# Supplementary material for: The Discovery of Novel Biomarkers Improves Breast Cancer Intrinsic Subtype Prediction and Reconciles the Labels in the METABRIC Data Set
Source: PLoS One. 2015 Jul 1;10(7):e0129711. doi: 10.1371/journal.pone.0129711 (PMC4488510; doi:10.1371/journal.pone.0129711)
Supplement: S1 Table — Table listing the CM1 score used to rank the set of 48803 probes for each of the five breast cancer subtypes in the METABRIC discovery data set. In each case, we selected the top 10 highly discriminative probes (5 with the greatest positive CM1 score values—indicating up-regulated probes relative to the other subtypes, and 5 with the smallest negative values—representing down-regulation). (XLSX) [file pone.0129711.s003.xlsx]

## Sheet: Legends
The tabs contain the CM1 scores for all probes and for each subtype as class of interest, computed in the discovery dataset.
Probes are ordered in increasing CM1 score value.
Each tab also contains a graph containing the full profile of CM1 scores, and another graph with the profile of the 25 topmost and 25 bottom-most CM1 scores.

## Sheet: CM1.LuminalA
Probe_ID	CM1 score		Graphs																	Top CM1 score, negative	Probe_ID	Top CM1 score, positive
ILMN_1684217	-0.202688																			-0.202688	ILMN_1684217
ILMN_1714730	-0.200129																			-0.200129	ILMN_1714730
ILMN_1683450	-0.196227																			-0.196227	ILMN_1683450
ILMN_2212909	-0.195657																			-0.195657	ILMN_2212909
ILMN_1747016	-0.19531																			-0.19531	ILMN_1747016
ILMN_2301083	-0.192876																			-0.192876	ILMN_2301083
ILMN_1753196	-0.19057																			-0.19057	ILMN_1753196
ILMN_2042771	-0.189154																			-0.189154	ILMN_2042771
ILMN_2202948	-0.185701																			-0.185701	ILMN_2202948
ILMN_1801257	-0.185185																			-0.185185	ILMN_1801257
ILMN_1663390	-0.184524																			-0.184524	ILMN_1663390
ILMN_1670238	-0.184086																			-0.184086	ILMN_1670238
ILMN_1801939	-0.183752																			-0.183752	ILMN_1801939
ILMN_1815184	-0.182105																			-0.182105	ILMN_1815184
ILMN_1751444	-0.181996																			-0.181996	ILMN_1751444
ILMN_1666305	-0.180861																			-0.180861	ILMN_1666305
ILMN_1673721	-0.180005																			-0.180005	ILMN_1673721
ILMN_1685916	-0.179461																			-0.179461	ILMN_1685916
ILMN_1731184	-0.178718																			-0.178718	ILMN_1731184
ILMN_1770678	-0.177481																			-0.177481	ILMN_1770678
ILMN_1796949	-0.177148																			-0.177148	ILMN_1796949
ILMN_2049021	-0.174417																			-0.174417	ILMN_2049021
ILMN_1720526	-0.173964																			-0.173964	ILMN_1720526
ILMN_1695658	-0.172892																			-0.172892	ILMN_1695658
ILMN_1713952	-0.172846																			-0.172846	ILMN_1713952
ILMN_2349459	-0.171083																				ILMN_1835913	0.164926
ILMN_2413898	-0.170529																				ILMN_1686562	0.165439
ILMN_1716279	-0.167635																				ILMN_1670099	0.166155
ILMN_1796589	-0.167481																				ILMN_2113490	0.166293
ILMN_1786125	-0.166497																				ILMN_1779416	0.166532
ILMN_1781943	-0.164268																				ILMN_1811014	0.167308
ILMN_1788166	-0.163931																				ILMN_1691884	0.168732
ILMN_1700337	-0.16383																				ILMN_2092077	0.169466
ILMN_1737184	-0.162242																				ILMN_1698885	0.17174
ILMN_2077550	-0.161543																				ILMN_2353862	0.171824
ILMN_1799667	-0.161118																				ILMN_2406656	0.175312
ILMN_1728934	-0.160996																				ILMN_1699665	0.177687
ILMN_2222008	-0.159111																				ILMN_1745501	0.181098
ILMN_1709294	-0.158228																				ILMN_2066088	0.182066
ILMN_1703906	-0.157873																				ILMN_1785570	0.182283
ILMN_1720373	-0.156362																				ILMN_1784783	0.186706
ILMN_1749829	-0.156085																				ILMN_1722489	0.189764
ILMN_1651237	-0.154633																				ILMN_1678535	0.195049
ILMN_1740291	-0.153315																				ILMN_1813607	0.197436
ILMN_1664630	-0.15105																				ILMN_1695397	0.20031
ILMN_1737728	-0.150812																				ILMN_1728787	0.202989
ILMN_2413650	-0.150333																				ILMN_1688071	0.214525
ILMN_1729801	-0.147643																				ILMN_1796059	0.215643
ILMN_1771039	-0.147143																				ILMN_2310814	0.221216
ILMN_1794539	-0.146214																				ILMN_1651329	0.221401
ILMN_2103107	-0.145615
ILMN_1789123	-0.145338
ILMN_2368718	-0.145096
ILMN_1726720	-0.143814
ILMN_1751776	-0.143784
ILMN_1711470	-0.142626
ILMN_2143155	-0.142574
ILMN_1777564	-0.142212
ILMN_2344971	-0.14208
ILMN_1739645	-0.141765
ILMN_1680955	-0.141048
ILMN_1766658	-0.140748
ILMN_2357438	-0.14071
ILMN_2196984	-0.140425
ILMN_1806040	-0.140279
ILMN_1750974	-0.1392
ILMN_1668814	-0.139108
ILMN_1692938	-0.138841
ILMN_1731070	-0.138134
ILMN_1708105	-0.137818
ILMN_1786065	-0.137714
ILMN_2409220	-0.137458
ILMN_2409298	-0.13681
ILMN_2392472	-0.136804
ILMN_1681503	-0.136682
ILMN_1728972	-0.136681
ILMN_1777233	-0.134935
ILMN_1749118	-0.134178
ILMN_1791759	-0.132612
ILMN_1747911	-0.132044
ILMN_1783333	-0.13192
ILMN_2148796	-0.131797
ILMN_1709484	-0.131584
ILMN_2048700	-0.131236
ILMN_1678300	-0.130579
ILMN_1808071	-0.130285
ILMN_1657796	-0.130148
ILMN_2368721	-0.129771
ILMN_2362549	-0.129148
ILMN_2139816	-0.128964
ILMN_2072296	-0.128722
ILMN_1762883	-0.127625
ILMN_1753063	-0.126943
ILMN_1735093	-0.126599
ILMN_1702197	-0.126448
ILMN_1814281	-0.126327
ILMN_1806037	-0.125888
ILMN_1670353	-0.125876
ILMN_1729115	-0.12569
ILMN_1664511	-0.125067
ILMN_1781942	-0.124817
ILMN_1724407	-0.124206
ILMN_1721868	-0.124001
ILMN_1673673	-0.123337
ILMN_1708101	-0.123159
ILMN_2080611	-0.12309
ILMN_1716400	-0.122886
ILMN_2404906	-0.122853
ILMN_1782403	-0.122548
ILMN_1745356	-0.122403
ILMN_2412384	-0.12229
ILMN_1772964	-0.121815
ILMN_2311537	-0.121784
ILMN_1737205	-0.121569
ILMN_1701195	-0.12131
ILMN_1811472	-0.121141
ILMN_1730825	-0.121119
ILMN_2412860	-0.120656
ILMN_1746673	-0.120609
ILMN_1758939	-0.120577
ILMN_2181432	-0.120382
ILMN_2338323	-0.120127
ILMN_1763907	-0.120062
ILMN_1808591	-0.119839
ILMN_1770725	-0.119648
ILMN_1783285	-0.11951
ILMN_1711005	-0.119477
ILMN_1771734	-0.119401
ILMN_1686097	-0.118705
ILMN_1747303	-0.118563
ILMN_1701882	-0.118081
ILMN_1761247	-0.118052
ILMN_1771224	-0.117871
ILMN_2148785	-0.117837
ILMN_1671906	-0.117747
ILMN_1667224	-0.117671
ILMN_2285996	-0.11763
ILMN_2051373	-0.117315
ILMN_2374425	-0.11726
ILMN_1674706	-0.116911
ILMN_1800091	-0.116824
ILMN_1724489	-0.116706
ILMN_1725260	-0.116582
ILMN_2235137	-0.116384
ILMN_1796074	-0.11631
ILMN_1665538	-0.116222
ILMN_2336781	-0.116076
ILMN_2401436	-0.116067
ILMN_1787280	-0.115774
ILMN_2225718	-0.11564
ILMN_2216852	-0.115537
ILMN_2109489	-0.115416
ILMN_1712452	-0.11505
ILMN_1727055	-0.114985
ILMN_1743620	-0.11434
ILMN_1664516	-0.114208
ILMN_1712803	-0.114137
ILMN_2172174	-0.114015
ILMN_1701114	-0.113499
ILMN_1704537	-0.113156
ILMN_1695414	-0.112787
ILMN_1742577	-0.112523
ILMN_1703324	-0.112224
ILMN_2203271	-0.112204
ILMN_1761486	-0.111691
ILMN_1742145	-0.11157
ILMN_1716909	-0.111551
ILMN_1798654	-0.111309
ILMN_1815169	-0.111267
ILMN_1663195	-0.111236
ILMN_1660654	-0.111093
ILMN_1782389	-0.111
ILMN_1802819	-0.110876
ILMN_2170814	-0.110502
ILMN_1736816	-0.110405
ILMN_1785756	-0.110376
ILMN_2364529	-0.109843
ILMN_1677765	-0.109195
ILMN_1744240	-0.108994
ILMN_1691364	-0.108803
ILMN_1758629	-0.108738
ILMN_1746517	-0.107954
ILMN_1690105	-0.107953
ILMN_2160929	-0.107905
ILMN_1773459	-0.107395
ILMN_1682336	-0.10737
ILMN_1687107	-0.107087
ILMN_2323508	-0.107051
ILMN_1754272	-0.106937
ILMN_1717173	-0.106858
ILMN_2196569	-0.106798
ILMN_1798804	-0.106723
ILMN_1815626	-0.106677
ILMN_2383383	-0.106608
ILMN_1715583	-0.106538
ILMN_2165867	-0.106439
ILMN_2388547	-0.106212
ILMN_1756326	-0.105904
ILMN_1671933	-0.105063
ILMN_1776490	-0.105001
ILMN_1759277	-0.104992
ILMN_1780667	-0.104723
ILMN_1803124	-0.10463
ILMN_1756572	-0.104625
ILMN_1736176	-0.104588
ILMN_1809931	-0.104556
ILMN_2041577	-0.104527
ILMN_1696713	-0.104474
ILMN_1732516	-0.10424
ILMN_1742779	-0.104222
ILMN_1709039	-0.104205
ILMN_1813338	-0.103993
ILMN_2413899	-0.103831
ILMN_1768662	-0.103781
ILMN_1789944	-0.103487
ILMN_2233783	-0.103458
ILMN_1811433	-0.103085
ILMN_2275248	-0.103059
ILMN_1760849	-0.102991
ILMN_2101832	-0.102856
ILMN_1659953	-0.102833
ILMN_1790537	-0.102692
ILMN_1805737	-0.102571
ILMN_1681737	-0.102351
ILMN_1740265	-0.102246
ILMN_1737514	-0.102035
ILMN_2094061	-0.101963
ILMN_2338038	-0.101833
ILMN_1707858	-0.101765
ILMN_1717056	-0.101304
ILMN_1777565	-0.101287
ILMN_1715068	-0.101154
ILMN_2242463	-0.10085
ILMN_2103720	-0.100699
ILMN_2038778	-0.100688
ILMN_1673962	-0.100642
ILMN_1658027	-0.100565
ILMN_1680196	-0.100364
ILMN_2219466	-0.100316
ILMN_2114568	-0.10027
ILMN_2405521	-0.100218
ILMN_1664855	-0.10007
ILMN_1715616	-0.099801
ILMN_1787477	-0.0997397
ILMN_1656452	-0.0997172
ILMN_2103685	-0.0996225
ILMN_2330861	-0.0992598
ILMN_1654268	-0.0991992
ILMN_1751079	-0.0988662
ILMN_1703092	-0.0988238
ILMN_1656185	-0.098716
ILMN_1660031	-0.0986031
ILMN_1810901	-0.098594
ILMN_1656310	-0.0985882
ILMN_2041293	-0.0983558
ILMN_2406501	-0.0982203
ILMN_1778321	-0.0981837
ILMN_1910908	-0.0981405
ILMN_2162972	-0.0980039
ILMN_2370365	-0.0979142
ILMN_1799516	-0.0978344
ILMN_1779711	-0.0978024
ILMN_1659285	-0.0976053
ILMN_2124769	-0.097602
ILMN_2407619	-0.0975961
ILMN_1696347	-0.0972764
ILMN_1652008	-0.0971513
ILMN_1678669	-0.0971277
ILMN_1777691	-0.0969843
ILMN_1688753	-0.0968257
ILMN_1741801	-0.0967596
ILMN_1681754	-0.0966063
ILMN_2141807	-0.0963757
ILMN_1666553	-0.0963141
ILMN_1798210	-0.0959994
ILMN_1710676	-0.0959143
ILMN_2043060	-0.095876
ILMN_1777519	-0.0958226
ILMN_2265654	-0.0957914
ILMN_1736042	-0.0956204
ILMN_1736510	-0.0955246
ILMN_1805828	-0.0953829
ILMN_1711314	-0.0951184
ILMN_1706706	-0.0951183
ILMN_1671257	-0.0950654
ILMN_1734827	-0.0950635
ILMN_1768293	-0.0948934
ILMN_1656718	-0.0946833
ILMN_1779813	-0.0946099
ILMN_1674231	-0.0945615
ILMN_1788462	-0.0944968
ILMN_1659960	-0.0943034
ILMN_1748352	-0.0942692
ILMN_1756676	-0.0941027
ILMN_1722127	-0.0940767
ILMN_1661622	-0.0939518
ILMN_2379599	-0.0938686
ILMN_2211003	-0.0937961
ILMN_1718297	-0.0937943
ILMN_1800261	-0.0937042
ILMN_2355738	-0.0936804
ILMN_2131336	-0.0935768
ILMN_1752899	-0.0935588
ILMN_1807277	-0.093508
ILMN_2152502	-0.0933861
ILMN_1695357	-0.0933525
ILMN_1792885	-0.0933265
ILMN_1798270	-0.0933159
ILMN_1737580	-0.0933144
ILMN_2161820	-0.0932781
ILMN_1810228	-0.0931739
ILMN_1813270	-0.0931612
ILMN_1662364	-0.0931446
ILMN_2374633	-0.0931195
ILMN_1736441	-0.0929465
ILMN_1674662	-0.092918
ILMN_1772241	-0.0928529
ILMN_1722622	-0.0928314
ILMN_1801928	-0.0928121
ILMN_2266595	-0.0928119
ILMN_2132161	-0.0928063
ILMN_1725612	-0.0927886
ILMN_1705814	-0.0927809
ILMN_1728225	-0.0927405
ILMN_1700031	-0.0926461
ILMN_1736597	-0.0926223
ILMN_1710740	-0.0926003
ILMN_1774028	-0.0925086
ILMN_1714759	-0.0923194
ILMN_1763540	-0.0921184
ILMN_1763487	-0.0920513
ILMN_1757697	-0.0919634
ILMN_1811650	-0.0918214
ILMN_1773119	-0.0917984
ILMN_1765880	-0.0917762
ILMN_1731640	-0.0917662
ILMN_2041046	-0.0917499
ILMN_1804601	-0.0912482
ILMN_1652913	-0.0911681
ILMN_2126706	-0.0911187
ILMN_2334204	-0.0910856
ILMN_1715905	-0.0910542
ILMN_1740512	-0.090854
ILMN_2381397	-0.0908472
ILMN_2364022	-0.0907815
ILMN_1753243	-0.0907706
ILMN_1684045	-0.0907193
ILMN_1673363	-0.0906161
ILMN_1737283	-0.0905795
ILMN_1747943	-0.0905524
ILMN_1707339	-0.0903785
ILMN_1737195	-0.0903511
ILMN_2368971	-0.0903092
ILMN_1768273	-0.0902082
ILMN_2351916	-0.0901248
ILMN_1751086	-0.0900587
ILMN_2373062	-0.0900014
ILMN_1804735	-0.0899693
ILMN_2109156	-0.0898004
ILMN_1704750	-0.0893394
ILMN_1681301	-0.089307
ILMN_1682792	-0.0892177
ILMN_1654319	-0.0891694
ILMN_2219712	-0.0891466
ILMN_1679195	-0.0891454
ILMN_1776577	-0.0889333
ILMN_1704294	-0.0889192
ILMN_1758418	-0.0888664
ILMN_1801442	-0.088847
ILMN_1669424	-0.0888128
ILMN_1653358	-0.0887389
ILMN_1653822	-0.0886586
ILMN_2138765	-0.088455
ILMN_1683475	-0.0884312
ILMN_1700268	-0.0879268
ILMN_1779264	-0.0879081
ILMN_1745420	-0.087849
ILMN_2044617	-0.0877457
ILMN_2311548	-0.0877418
ILMN_1704873	-0.0876309
ILMN_1704702	-0.0876066
ILMN_1708934	-0.0875846
ILMN_1761961	-0.0875802
ILMN_1737396	-0.0875085
ILMN_1746699	-0.0873924
ILMN_2205050	-0.0872165
ILMN_1796316	-0.0871959
ILMN_1777584	-0.0870996
ILMN_1786834	-0.0870731
ILMN_1713397	-0.0870558
ILMN_1676899	-0.0870493
ILMN_2283388	-0.086975
ILMN_1750518	-0.0869247
ILMN_1655642	-0.086921
ILMN_1755834	-0.0868988
ILMN_1655046	-0.0868162
ILMN_1664303	-0.086768
ILMN_1665583	-0.086756
ILMN_1726410	-0.0866725
ILMN_2066020	-0.0864934
ILMN_1807807	-0.0864799
ILMN_1667825	-0.0864527
ILMN_1719256	-0.0862985
ILMN_1711886	-0.0862937
ILMN_2222234	-0.0862765
ILMN_1719753	-0.0862745
ILMN_1695226	-0.0861926
ILMN_2332250	-0.0861662
ILMN_2317923	-0.0861239
ILMN_1655867	-0.0861088
ILMN_1759453	-0.0860481
ILMN_1765701	-0.0859329
ILMN_1679438	-0.0859229
ILMN_2073758	-0.0858626
ILMN_1720858	-0.0858296
ILMN_2387599	-0.085788
ILMN_1727459	-0.085768
ILMN_1692223	-0.0857494
ILMN_1691717	-0.0856853
ILMN_2066858	-0.0855995
ILMN_1775008	-0.0855564
ILMN_2162989	-0.0855339
ILMN_1783304	-0.0854415
ILMN_1714335	-0.0852331
ILMN_1797822	-0.0852041
ILMN_2373689	-0.0851622
ILMN_1703692	-0.0851146
ILMN_1755354	-0.0850121
ILMN_1684158	-0.0850076
ILMN_1669927	-0.0849609
ILMN_1704305	-0.0847935
ILMN_1805973	-0.08472
ILMN_1790100	-0.0847178
ILMN_2066756	-0.0847079
ILMN_1743711	-0.0846732
ILMN_1791726	-0.0846407
ILMN_1693014	-0.0845951
ILMN_1710756	-0.0845794
ILMN_1790692	-0.0845713
ILMN_2384785	-0.0845394
ILMN_1699603	-0.0844045
ILMN_1663119	-0.0843321
ILMN_2312340	-0.084298
ILMN_1708798	-0.0842204
ILMN_1670302	-0.0842154
ILMN_1795762	-0.0841576
ILMN_2395236	-0.0840982
ILMN_1729188	-0.0840322
ILMN_1671554	-0.0839792
ILMN_1701724	-0.083974
ILMN_1791366	-0.0839559
ILMN_1815039	-0.0839237
ILMN_1760143	-0.0838367
ILMN_1802252	-0.0838351
ILMN_1774661	-0.083775
ILMN_1791002	-0.0836105
ILMN_2101885	-0.0834775
ILMN_1652580	-0.0834422
ILMN_1744295	-0.0833936
ILMN_1716384	-0.0832763
ILMN_2364062	-0.0832308
ILMN_1803110	-0.0832061
ILMN_1661264	-0.0830968
ILMN_1806818	-0.0830763
ILMN_1694810	-0.0829262
ILMN_2334296	-0.082888
ILMN_2057479	-0.0826815
ILMN_1691508	-0.0825556
ILMN_1698733	-0.0824472
ILMN_1670723	-0.0823505
ILMN_1781155	-0.0823068
ILMN_1683120	-0.0822985
ILMN_1715636	-0.0821404
ILMN_2155272	-0.0821279
ILMN_2267787	-0.0820887
ILMN_2381257	-0.0820499
ILMN_1690911	-0.0820484
ILMN_2073604	-0.0820205
ILMN_1689665	-0.0819988
ILMN_2362545	-0.0819892
ILMN_1815205	-0.0818204
ILMN_1759330	-0.0818129
ILMN_2202915	-0.0817633
ILMN_1712532	-0.0817548
ILMN_1745397	-0.0816973
ILMN_2204876	-0.0816464
ILMN_1659913	-0.0815217
ILMN_1777325	-0.0814894
ILMN_1738530	-0.0814858
ILMN_1741133	-0.0814002
ILMN_1674243	-0.0813634
ILMN_1759495	-0.0813551
ILMN_2323933	-0.0813473
ILMN_1659888	-0.0812993
ILMN_1759743	-0.0812023
ILMN_2215881	-0.0810906
ILMN_1704398	-0.0810896
ILMN_1881909	-0.0810785
ILMN_1796409	-0.0810433
ILMN_1684114	-0.0809085
ILMN_1808661	-0.0808869
ILMN_2330243	-0.0808728
ILMN_1764850	-0.0808516
ILMN_1804530	-0.080794
ILMN_1663751	-0.0807846
ILMN_1666269	-0.0807638
ILMN_1711904	-0.080743
ILMN_1777322	-0.0807291
ILMN_1730491	-0.0807162
ILMN_1662184	-0.0805723
ILMN_1680274	-0.0805305
ILMN_1733270	-0.0805297
ILMN_1686989	-0.0804507
ILMN_1803686	-0.0804135
ILMN_1694177	-0.0803416
ILMN_1757627	-0.0803086
ILMN_1658995	-0.0802982
ILMN_1673073	-0.0802667
ILMN_1670218	-0.0801927
ILMN_1343295	-0.0801769
ILMN_2374352	-0.080169
ILMN_1778543	-0.0801496
ILMN_2255133	-0.0800668
ILMN_1806867	-0.0800256
ILMN_1810423	-0.0799369
ILMN_1728132	-0.0798838
ILMN_1783728	-0.0798756
ILMN_2184373	-0.0798264
ILMN_1729749	-0.0798137
ILMN_1747630	-0.0798055
ILMN_1731503	-0.0797674
ILMN_1678605	-0.0797658
ILMN_2162253	-0.0797315
ILMN_1727271	-0.0796497
ILMN_1685480	-0.0796418
ILMN_1784884	-0.0796264
ILMN_2221564	-0.0795397
ILMN_2414848	-0.079476
ILMN_1669502	-0.0794578
ILMN_1764794	-0.0793898
ILMN_1742074	-0.0792538
ILMN_1721732	-0.0792444
ILMN_2132599	-0.0791558
ILMN_2337655	-0.0791386
ILMN_1712432	-0.0790939
ILMN_2294431	-0.0790237
ILMN_1678493	-0.0790073
ILMN_2379469	-0.0789349
ILMN_1687768	-0.078928
ILMN_2120022	-0.0788988
ILMN_1785902	-0.0788495
ILMN_1657550	-0.0788281
ILMN_1690566	-0.0786741
ILMN_1675186	-0.0786518
ILMN_1783593	-0.0785767
ILMN_1713505	-0.0785664
ILMN_1671442	-0.0783937
ILMN_1804051	-0.0783507
ILMN_2043452	-0.0782901
ILMN_2199676	-0.0782884
ILMN_1787628	-0.07826
ILMN_1708672	-0.0781686
ILMN_2048636	-0.0781038
ILMN_1782504	-0.0780714
ILMN_2412564	-0.0780599
ILMN_1682015	-0.0780071
ILMN_1772521	-0.0780027
ILMN_1703314	-0.0779546
ILMN_2352216	-0.0779409
ILMN_2224143	-0.0779019
ILMN_2395240	-0.077854
ILMN_1759628	-0.0777439
ILMN_1795852	-0.0776298
ILMN_1742167	-0.0776085
ILMN_1770044	-0.0775907
ILMN_2306033	-0.0773883
ILMN_1748883	-0.0773731
ILMN_2364357	-0.0773433
ILMN_1768969	-0.0773264
ILMN_1792538	-0.0772185
ILMN_1667994	-0.0771996
ILMN_1652207	-0.0771555
ILMN_2379130	-0.0770526
ILMN_1658040	-0.0770419
ILMN_1677404	-0.0770137
ILMN_1694268	-0.0769669
ILMN_1804248	-0.0769057
ILMN_1716859	-0.0767545
ILMN_1716766	-0.0767452
ILMN_1662658	-0.0767222
ILMN_1748283	-0.0767221
ILMN_1753183	-0.0766543
ILMN_1745299	-0.0766462
ILMN_1653856	-0.0766335
ILMN_1699772	-0.0766185
ILMN_1793729	-0.076593
ILMN_1669376	-0.0764759
ILMN_1780188	-0.0764724
ILMN_1725139	-0.076436
ILMN_1815303	-0.0763794
ILMN_1774336	-0.0763313
ILMN_1865056	-0.0762481
ILMN_1761314	-0.0762078
ILMN_2328972	-0.0761467
ILMN_1789510	-0.0761074
ILMN_1662358	-0.0760303
ILMN_2154836	-0.0760202
ILMN_2389013	-0.0759444
ILMN_1757631	-0.0759272
ILMN_1780060	-0.0759123
ILMN_1793241	-0.0758974
ILMN_1707448	-0.0758504
ILMN_1761155	-0.0758418
ILMN_1721457	-0.0757664
ILMN_1717714	-0.0757208
ILMN_1692731	-0.0756945
ILMN_1815666	-0.0756321
ILMN_2366041	-0.0756241
ILMN_1727540	-0.0755276
ILMN_2044832	-0.075466
ILMN_1681249	-0.0754283
ILMN_1725276	-0.0754273
ILMN_1704055	-0.0753433
ILMN_2043816	-0.0752761
ILMN_1785037	-0.0752211
ILMN_1682165	-0.0751959
ILMN_1801077	-0.0751839
ILMN_1695271	-0.075182
ILMN_2355953	-0.0751784
ILMN_2155172	-0.0751359
ILMN_1815115	-0.0751141
ILMN_1748578	-0.0751136
ILMN_2141259	-0.0750672
ILMN_1700419	-0.0750326
ILMN_1657871	-0.0750056
ILMN_1812759	-0.0749385
ILMN_1674811	-0.0748943
ILMN_1695719	-0.0748663
ILMN_1796235	-0.0747702
ILMN_1731612	-0.0745222
ILMN_1810420	-0.0744478
ILMN_1768816	-0.0744369
ILMN_1674533	-0.0743981
ILMN_1798256	-0.0743806
ILMN_1789007	-0.0743131
ILMN_1771385	-0.0743123
ILMN_1671843	-0.0743066
ILMN_1775498	-0.0743016
ILMN_1812995	-0.0742658
ILMN_2166865	-0.0741897
ILMN_2353161	-0.0741601
ILMN_1784860	-0.0741164
ILMN_2395451	-0.0741072
ILMN_1766408	-0.0739673
ILMN_1664756	-0.0739613
ILMN_1746846	-0.0738074
ILMN_2106107	-0.0737963
ILMN_1692684	-0.0737748
ILMN_2330307	-0.0737613
ILMN_1796962	-0.0737478
ILMN_1702933	-0.0737271
ILMN_1713813	-0.0737223
ILMN_2061732	-0.0737209
ILMN_1738326	-0.0736974
ILMN_2374036	-0.0736563
ILMN_1760441	-0.0736483
ILMN_2152581	-0.0735938
ILMN_1751753	-0.0735615
ILMN_1660462	-0.0735033
ILMN_1779376	-0.0734867
ILMN_1748770	-0.0734745
ILMN_1809590	-0.0734696
ILMN_2085760	-0.0734493
ILMN_2388155	-0.07343
ILMN_1792138	-0.0733856
ILMN_1712386	-0.0733683
ILMN_2344120	-0.073363
ILMN_2285802	-0.0733228
ILMN_1708160	-0.0732965
ILMN_2351611	-0.0732676
ILMN_2375032	-0.0732469
ILMN_1814600	-0.07314
ILMN_2366391	-0.0731312
ILMN_1782070	-0.0731052
ILMN_1719870	-0.0730543
ILMN_1770623	-0.0730152
ILMN_1800619	-0.0730148
ILMN_1662198	-0.0729617
ILMN_1723912	-0.0729309
ILMN_1787461	-0.0729291
ILMN_1741054	-0.0728846
ILMN_1794692	-0.0728644
ILMN_1798014	-0.0728418
ILMN_1762275	-0.0728354
ILMN_1652082	-0.0728258
ILMN_1751656	-0.0728224
ILMN_1767658	-0.0728188
ILMN_1733421	-0.0727772
ILMN_1685112	-0.0727729
ILMN_1814823	-0.0727273
ILMN_1726064	-0.0726294
ILMN_2367010	-0.0726015
ILMN_2067890	-0.0725872
ILMN_1699695	-0.0725533
ILMN_1668012	-0.0725518
ILMN_1677376	-0.0725516
ILMN_1733259	-0.0724604
ILMN_1771026	-0.0724586
ILMN_1808219	-0.0724251
ILMN_1681221	-0.0724239
ILMN_1737484	-0.0724202
ILMN_1796417	-0.0723967
ILMN_2358540	-0.0723849
ILMN_1698996	-0.0723553
ILMN_1754332	-0.0723486
ILMN_1655733	-0.0723253
ILMN_1790757	-0.0722977
ILMN_1708743	-0.0722926
ILMN_1797307	-0.0722748
ILMN_1792672	-0.0722495
ILMN_1668766	-0.0721779
ILMN_1668861	-0.07197
ILMN_1679800	-0.0719633
ILMN_2219131	-0.0719424
ILMN_1797372	-0.07188
ILMN_1680129	-0.0718518
ILMN_2235283	-0.0717853
ILMN_1793517	-0.0717671
ILMN_1758728	-0.0717353
ILMN_2181191	-0.0717035
ILMN_1707493	-0.0717015
ILMN_1709953	-0.0716771
ILMN_1798204	-0.0716709
ILMN_1750051	-0.0716579
ILMN_1707475	-0.071642
ILMN_1655307	-0.0716132
ILMN_1761175	-0.0716041
ILMN_1677446	-0.0715875
ILMN_1810838	-0.071563
ILMN_2324421	-0.0715293
ILMN_1658010	-0.0714924
ILMN_1680104	-0.0714482
ILMN_1702806	-0.0713419
ILMN_1738093	-0.071334
ILMN_2200331	-0.0713336
ILMN_2278819	-0.0712536
ILMN_2112599	-0.071201
ILMN_1722491	-0.0711952
ILMN_1748923	-0.071176
ILMN_1797693	-0.0711632
ILMN_1706238	-0.0711417
ILMN_2257432	-0.0711343
ILMN_1730201	-0.0711025
ILMN_1708779	-0.0710942
ILMN_1676159	-0.0710577
ILMN_1745885	-0.0710379
ILMN_1750748	-0.0709894
ILMN_1732538	-0.0709451
ILMN_1677768	-0.0709076
ILMN_1793033	-0.0709021
ILMN_1726448	-0.0708735
ILMN_1778010	-0.0707098
ILMN_1685774	-0.0706722
ILMN_1660840	-0.0706112
ILMN_1828699	-0.0705599
ILMN_1714602	-0.0705494
ILMN_1777096	-0.0705456
ILMN_1680314	-0.0705413
ILMN_2074258	-0.0705366
ILMN_2092850	-0.0705285
ILMN_1697710	-0.0704918
ILMN_1763955	-0.0704691
ILMN_1715179	-0.0703711
ILMN_1815130	-0.0703459
ILMN_1703617	-0.070265
ILMN_2381138	-0.0702647
ILMN_1768020	-0.0702563
ILMN_1697998	-0.0702139
ILMN_1714623	-0.0701419
ILMN_1702691	-0.0701205
ILMN_1684699	-0.0700916
ILMN_1656287	-0.0700753
ILMN_1710906	-0.0699764
ILMN_2045729	-0.0699276
ILMN_1716276	-0.0698252
ILMN_2399893	-0.0697617
ILMN_1682008	-0.0697422
ILMN_1736568	-0.0696133
ILMN_1792681	-0.0696022
ILMN_1790819	-0.0695883
ILMN_1810275	-0.0695662
ILMN_1733374	-0.0695186
ILMN_1709085	-0.0694896
ILMN_1667561	-0.0694841
ILMN_1701966	-0.0694762
ILMN_1799024	-0.0694673
ILMN_2058782	-0.0693709
ILMN_1764362	-0.0693623
ILMN_1749243	-0.0693341
ILMN_1784655	-0.0692458
ILMN_1764927	-0.0692183
ILMN_1795183	-0.0691711
ILMN_2307903	-0.0691709
ILMN_2173451	-0.0691309
ILMN_1665797	-0.0690991
ILMN_1772369	-0.0690806
ILMN_1772189	-0.0690593
ILMN_1711988	-0.0690289
ILMN_1783469	-0.0690164
ILMN_1770515	-0.0690146
ILMN_1755974	-0.0689235
ILMN_1688971	-0.0689134
ILMN_1702783	-0.0688806
ILMN_2136495	-0.0688264
ILMN_1681802	-0.0688028
ILMN_1729051	-0.0688027
ILMN_2224657	-0.0687935
ILMN_1729197	-0.068765
ILMN_1794505	-0.068762
ILMN_2384591	-0.0687421
ILMN_2278729	-0.0687023
ILMN_2415439	-0.0686914
ILMN_1736760	-0.0686807
ILMN_1693218	-0.0686148
ILMN_1784300	-0.068497
ILMN_1810875	-0.0684666
ILMN_2108709	-0.0684171
ILMN_1764090	-0.0683313
ILMN_1658695	-0.0682429
ILMN_2054019	-0.0682196
ILMN_1726756	-0.0682167
ILMN_1790218	-0.0682137
ILMN_1710428	-0.0681991
ILMN_2193233	-0.0681836
ILMN_1737517	-0.0681801
ILMN_1680453	-0.0681475
ILMN_1664369	-0.0681321
ILMN_1717490	-0.0681275
ILMN_2219002	-0.0679514
ILMN_1684585	-0.0679081
ILMN_1671603	-0.0678953
ILMN_1677305	-0.0678622
ILMN_2212590	-0.0678114
ILMN_1701289	-0.0677628
ILMN_1652394	-0.0677248
ILMN_1771051	-0.0676175
ILMN_2161556	-0.0675845
ILMN_1762002	-0.0675749
ILMN_1765146	-0.067566
ILMN_1681679	-0.0675327
ILMN_1807491	-0.067496
ILMN_1799389	-0.0674576
ILMN_2131293	-0.0674568
ILMN_1770692	-0.0674393
ILMN_2166524	-0.0674187
ILMN_1748476	-0.0673946
ILMN_1781373	-0.0673923
ILMN_1756898	-0.0673636
ILMN_2228809	-0.0673538
ILMN_1682428	-0.0673268
ILMN_1794260	-0.0673111
ILMN_2098126	-0.0673105
ILMN_1769517	-0.0672277
ILMN_1745954	-0.0670909
ILMN_1767747	-0.0670874
ILMN_2376108	-0.0670616
ILMN_2099277	-0.066979
ILMN_1745271	-0.0669649
ILMN_1766010	-0.066907
ILMN_1690939	-0.0667699
ILMN_1726574	-0.0667681
ILMN_1660222	-0.0667674
ILMN_1761797	-0.0667334
ILMN_1675085	-0.0667312
ILMN_1673711	-0.0666637
ILMN_2347949	-0.0666214
ILMN_2196078	-0.0666209
ILMN_1749930	-0.0666176
ILMN_1651987	-0.0665443
ILMN_1787378	-0.0665383
ILMN_2392635	-0.066532
ILMN_2075065	-0.0664392
ILMN_1655694	-0.0664392
ILMN_1781983	-0.0664353
ILMN_1793410	-0.0664232
ILMN_1674302	-0.0664144
ILMN_1690371	-0.0664134
ILMN_1782633	-0.0664131
ILMN_1775587	-0.0664045
ILMN_1673026	-0.0663612
ILMN_2260392	-0.0663233
ILMN_2110908	-0.0662661
ILMN_1732066	-0.0661504
ILMN_1804851	-0.0661429
ILMN_1794711	-0.06614
ILMN_1680626	-0.0661378
ILMN_2049766	-0.0661372
ILMN_1658407	-0.0661313
ILMN_1813671	-0.0661231
ILMN_1757497	-0.0661193
ILMN_1781758	-0.0661182
ILMN_1798249	-0.0660834
ILMN_1809522	-0.066079
ILMN_2366330	-0.0660441
ILMN_1673769	-0.0660406
ILMN_1698019	-0.0660314
ILMN_1709747	-0.0660148
ILMN_1661428	-0.066003
ILMN_1737918	-0.0659957
ILMN_2148847	-0.0659543
ILMN_1701455	-0.0659409
ILMN_1756784	-0.065921
ILMN_2148819	-0.0657887
ILMN_1778890	-0.0657688
ILMN_1815313	-0.0657287
ILMN_2188374	-0.0656431
ILMN_1683774	-0.0656196
ILMN_1758497	-0.0656122
ILMN_2149494	-0.0655947
ILMN_2104924	-0.0655862
ILMN_2193980	-0.0655786
ILMN_1718071	-0.0655785
ILMN_1763491	-0.0655679
ILMN_1720048	-0.0655664
ILMN_2368530	-0.0655444
ILMN_1782444	-0.0655201
ILMN_1665559	-0.0654818
ILMN_2383484	-0.0654494
ILMN_2135984	-0.0654259
ILMN_2345015	-0.0653984
ILMN_1679995	-0.0653908
ILMN_1715476	-0.0653904
ILMN_1780940	-0.0653759
ILMN_1653205	-0.0653414
ILMN_1779258	-0.0653282
ILMN_1777740	-0.0652962
ILMN_1670134	-0.065266
ILMN_2366388	-0.0652537
ILMN_1746706	-0.0652486
ILMN_1733519	-0.0652472
ILMN_1670809	-0.065247
ILMN_1759184	-0.0652076
ILMN_1781791	-0.0652016
ILMN_1662843	-0.0651653
ILMN_1742569	-0.0651534
ILMN_2202423	-0.0651245
ILMN_1718866	-0.0650962
ILMN_1779381	-0.0650736
ILMN_1658247	-0.065068
ILMN_2098743	-0.0650599
ILMN_1782487	-0.0650262
ILMN_1766713	-0.0649862
ILMN_1705407	-0.0649688
ILMN_1796423	-0.0649365
ILMN_1718136	-0.0649144
ILMN_2330267	-0.0649113
ILMN_1740633	-0.0648889
ILMN_1756793	-0.0648867
ILMN_1676846	-0.0648464
ILMN_1673207	-0.0648399
ILMN_1660729	-0.0648375
ILMN_1797318	-0.0648037
ILMN_1712950	-0.0647845
ILMN_1691892	-0.0647821
ILMN_1695025	-0.0647561
ILMN_1802780	-0.0646733
ILMN_1776173	-0.0646261
ILMN_1677829	-0.0646183
ILMN_1735156	-0.0646138
ILMN_1659843	-0.0645988
ILMN_2183687	-0.0645937
ILMN_1787762	-0.0645689
ILMN_2333670	-0.0645637
ILMN_1723158	-0.0645499
ILMN_1653553	-0.0644712
ILMN_1705617	-0.0644651
ILMN_1752953	-0.0644572
ILMN_1692295	-0.0644372
ILMN_1727315	-0.0644208
ILMN_1795464	-0.0644163
ILMN_1813704	-0.0643797
ILMN_2112256	-0.0643637
ILMN_1747744	-0.0643529
ILMN_1727050	-0.0643471
ILMN_2114720	-0.0643221
ILMN_1726456	-0.0642476
ILMN_1799819	-0.0642463
ILMN_1786720	-0.0642003
ILMN_1693192	-0.06417
ILMN_1766955	-0.0641534
ILMN_1657153	-0.0640873
ILMN_1774272	-0.0640836
ILMN_1696601	-0.0640802
ILMN_1683916	-0.0640771
ILMN_1776038	-0.0640419
ILMN_1783610	-0.0640381
ILMN_2086064	-0.0640355
ILMN_1809245	-0.0640341
ILMN_1679428	-0.0640295
ILMN_1760062	-0.0639848
ILMN_2262444	-0.0639363
ILMN_2376205	-0.0638845
ILMN_1796130	-0.0638583
ILMN_2181060	-0.0638529
ILMN_1740430	-0.0638525
ILMN_1704785	-0.0638297
ILMN_1741599	-0.0638241
ILMN_1815134	-0.0637904
ILMN_1726388	-0.0637813
ILMN_2403994	-0.0637687
ILMN_1761828	-0.0637519
ILMN_1776047	-0.063683
ILMN_2342271	-0.0636614
ILMN_1671337	-0.0636604
ILMN_1661776	-0.0636349
ILMN_1812580	-0.0636248
ILMN_1668270	-0.0636122
ILMN_1734878	-0.0636015
ILMN_1763875	-0.0635556
ILMN_1778599	-0.0635543
ILMN_1710427	-0.0635486
ILMN_1682494	-0.0635335
ILMN_2389810	-0.0635206
ILMN_1724148	-0.0634775
ILMN_1763260	-0.0634378
ILMN_1727051	-0.0634054
ILMN_2056975	-0.0633971
ILMN_2038776	-0.06339
ILMN_1697363	-0.0633365
ILMN_1700428	-0.0633241
ILMN_2209748	-0.0632917
ILMN_1808566	-0.0632692
ILMN_1697559	-0.0632365
ILMN_1740938	-0.0632188
ILMN_1799848	-0.0632023
ILMN_1735679	-0.0631788
ILMN_1749180	-0.0631652
ILMN_1714278	-0.0631053
ILMN_1675501	-0.0630801
ILMN_1653529	-0.063064
ILMN_1669635	-0.0630471
ILMN_1708778	-0.0630391
ILMN_1657892	-0.0630276
ILMN_2231928	-0.0629747
ILMN_1742922	-0.0629648
ILMN_1782551	-0.0629495
ILMN_1738401	-0.0629483
ILMN_1659682	-0.0629433
ILMN_1742230	-0.0629425
ILMN_2316918	-0.0629081
ILMN_2371964	-0.0628862
ILMN_1802951	-0.0628811
ILMN_1798459	-0.0628036
ILMN_1684929	-0.0627934
ILMN_1668535	-0.0627794
ILMN_1772796	-0.0627289
ILMN_1654690	-0.0627111
ILMN_1794165	-0.0627067
ILMN_1798380	-0.0626554
ILMN_1708348	-0.0626454
ILMN_1740429	-0.0626017
ILMN_2112988	-0.062588
ILMN_2316540	-0.0625636
ILMN_1713037	-0.0625606
ILMN_1845037	-0.0625541
ILMN_1738712	-0.0625465
ILMN_1744604	-0.0625457
ILMN_1690806	-0.0625077
ILMN_1680727	-0.0625057
ILMN_2396982	-0.0625001
ILMN_2383693	-0.0624614
ILMN_1707720	-0.0624557
ILMN_1696311	-0.0624216
ILMN_1801216	-0.0623962
ILMN_1666733	-0.0623884
ILMN_2377669	-0.0623595
ILMN_2129505	-0.0622831
ILMN_2387395	-0.0622619
ILMN_1661337	-0.0622411
ILMN_2178226	-0.0622219
ILMN_1717403	-0.0622213
ILMN_1660533	-0.0621859
ILMN_1672496	-0.0621826
ILMN_1807501	-0.0621824
ILMN_2413808	-0.062182
ILMN_1715437	-0.0621675
ILMN_1780255	-0.0621451
ILMN_2397880	-0.0621329
ILMN_2089340	-0.0620361
ILMN_2104929	-0.0619812
ILMN_2195914	-0.0619387
ILMN_1659364	-0.0619345
ILMN_1749875	-0.0619254
ILMN_1654639	-0.0619241
ILMN_1713875	-0.0619142
ILMN_2349610	-0.0618745
ILMN_2246882	-0.0618544
ILMN_2131882	-0.06183
ILMN_1801377	-0.061784
ILMN_1740762	-0.0617768
ILMN_1757278	-0.0617564
ILMN_2085862	-0.061747
ILMN_1718552	-0.0616851
ILMN_1773352	-0.0616629
ILMN_2334693	-0.061624
ILMN_1780057	-0.0616123
ILMN_1714861	-0.0615754
ILMN_1774823	-0.0615512
ILMN_1782938	-0.0615092
ILMN_1716736	-0.0615023
ILMN_1777971	-0.0614724
ILMN_1717313	-0.0614442
ILMN_2228710	-0.0614169
ILMN_1690099	-0.0614095
ILMN_1662932	-0.0613836
ILMN_1755075	-0.0613594
ILMN_1789775	-0.0613574
ILMN_1875123	-0.0613528
ILMN_2345016	-0.0613368
ILMN_2207291	-0.061334
ILMN_1708805	-0.061286
ILMN_1786426	-0.0612857
ILMN_1760201	-0.0612532
ILMN_2046896	-0.0612469
ILMN_1755749	-0.0612436
ILMN_1674411	-0.0612271
ILMN_1747504	-0.0612265
ILMN_1704477	-0.0612233
ILMN_1676924	-0.0612171
ILMN_2082762	-0.0611924
ILMN_2335718	-0.0611908
ILMN_1663486	-0.0611769
ILMN_1674228	-0.061158
ILMN_1740917	-0.0611578
ILMN_1673548	-0.0611385
ILMN_1654072	-0.0611286
ILMN_1656628	-0.0611211
ILMN_1708340	-0.0611026
ILMN_2221006	-0.061074
ILMN_2311826	-0.0610513
ILMN_2412024	-0.0610476
ILMN_1669842	-0.0610316
ILMN_1737498	-0.0610276
ILMN_1892859	-0.0610189
ILMN_1775285	-0.0609306
ILMN_1666206	-0.0609016
ILMN_1767320	-0.0608719
ILMN_1762861	-0.0608633
ILMN_1772713	-0.0608414
ILMN_1659524	-0.0608332
ILMN_1671158	-0.0607985
ILMN_1733164	-0.0607918
ILMN_1796337	-0.0607239
ILMN_1802615	-0.0607026
ILMN_1781986	-0.0606871
ILMN_1759084	-0.0606696
ILMN_1721762	-0.0606232
ILMN_1696485	-0.0605783
ILMN_2377980	-0.0605765
ILMN_2347193	-0.0605715
ILMN_2407389	-0.0605543
ILMN_1676515	-0.0605369
ILMN_1799134	-0.0605315
ILMN_1685824	-0.060529
ILMN_1749403	-0.0604884
ILMN_2151817	-0.0604778
ILMN_1761147	-0.0604729
ILMN_1664682	-0.060469
ILMN_2328776	-0.0604081
ILMN_1804953	-0.0603502
ILMN_1761858	-0.0603469
ILMN_1777483	-0.0603212
ILMN_2072603	-0.0603114
ILMN_1794522	-0.0602838
ILMN_1726986	-0.0602247
ILMN_1700413	-0.0602171
ILMN_1689146	-0.0601223
ILMN_2101375	-0.0600945
ILMN_2358541	-0.0600605
ILMN_1678186	-0.0600472
ILMN_1718863	-0.0600245
ILMN_1779399	-0.0600031
ILMN_2124802	-0.0599738
ILMN_2325837	-0.0599562
ILMN_1674285	-0.0599429
ILMN_1697309	-0.059887
ILMN_1811006	-0.059868
ILMN_1674385	-0.0598495
ILMN_1749297	-0.0598287
ILMN_1680018	-0.05981
ILMN_2413508	-0.059775
ILMN_1691949	-0.0597392
ILMN_1740572	-0.0597304
ILMN_2367418	-0.0597119
ILMN_1716704	-0.0597054
ILMN_2358457	-0.0596818
ILMN_1658327	-0.0596681
ILMN_1653828	-0.059633
ILMN_2137084	-0.0596228
ILMN_1658143	-0.0595765
ILMN_1870111	-0.0595652
ILMN_1803194	-0.0595627
ILMN_1811480	-0.059562
ILMN_1683052	-0.0595568
ILMN_2415926	-0.0595126
ILMN_2041327	-0.0594648
ILMN_1674859	-0.0594482
ILMN_1667371	-0.0594395
ILMN_1739428	-0.0594339
ILMN_1710962	-0.0594165
ILMN_1665737	-0.0593859
ILMN_2103591	-0.0593854
ILMN_1743034	-0.0593031
ILMN_1746686	-0.0592984
ILMN_1703370	-0.059295
ILMN_2183510	-0.0592862
ILMN_1789732	-0.0592636
ILMN_1796305	-0.0591838
ILMN_1737972	-0.0591442
ILMN_2332964	-0.0591207
ILMN_1683859	-0.0591202
ILMN_1666739	-0.059101
ILMN_1716445	-0.0590989
ILMN_1735735	-0.0590819
ILMN_2261416	-0.0590746
ILMN_2335704	-0.0590543
ILMN_1678238	-0.0590508
ILMN_1746588	-0.0590393
ILMN_1703337	-0.0590183
ILMN_1804812	-0.0590167
ILMN_1692026	-0.0590144
ILMN_2186806	-0.0589901
ILMN_1663454	-0.058989
ILMN_1672128	-0.0589655
ILMN_1669113	-0.0589427
ILMN_1793474	-0.0589208
ILMN_1680390	-0.0589076
ILMN_1701789	-0.0588926
ILMN_1677747	-0.0588519
ILMN_2411559	-0.0588169
ILMN_2405254	-0.0588051
ILMN_1798543	-0.0588022
ILMN_2230683	-0.0587774
ILMN_1678841	-0.058776
ILMN_1690610	-0.0587684
ILMN_1736752	-0.0587631
ILMN_1682993	-0.0587575
ILMN_1655549	-0.0587543
ILMN_1715401	-0.0587532
ILMN_2096747	-0.0587512
ILMN_1668469	-0.0587389
ILMN_1707312	-0.0587298
ILMN_1776347	-0.0587186
ILMN_2228035	-0.0587055
ILMN_1654773	-0.0586672
ILMN_1906423	-0.0586609
ILMN_1703718	-0.0586586
ILMN_1727043	-0.0586466
ILMN_1783075	-0.0586018
ILMN_1657683	-0.058587
ILMN_2414399	-0.0585791
ILMN_1810433	-0.0585748
ILMN_1728199	-0.0585646
ILMN_2146761	-0.0585303
ILMN_1706779	-0.0585275
ILMN_2322935	-0.0585139
ILMN_1691466	-0.0584825
ILMN_1683562	-0.0584814
ILMN_1807423	-0.0584679
ILMN_1734198	-0.0584583
ILMN_1790062	-0.0584566
ILMN_1745242	-0.0584427
ILMN_1794677	-0.0584327
ILMN_1679912	-0.0584274
ILMN_1781479	-0.0583987
ILMN_1800897	-0.0583729
ILMN_1751500	-0.0582619
ILMN_1670638	-0.0582615
ILMN_1698001	-0.0582552
ILMN_1787410	-0.0582266
ILMN_1807016	-0.0582052
ILMN_1792455	-0.0581543
ILMN_1693826	-0.058148
ILMN_1697864	-0.0581423
ILMN_1672417	-0.0581335
ILMN_1800197	-0.0581075
ILMN_1844464	-0.0581014
ILMN_2203950	-0.0580745
ILMN_1748591	-0.0580713
ILMN_1782745	-0.05805
ILMN_2170209	-0.0580279
ILMN_2075334	-0.0580258
ILMN_1685403	-0.0580256
ILMN_2341793	-0.0580167
ILMN_1674640	-0.0579917
ILMN_1736729	-0.0579824
ILMN_2376204	-0.0579772
ILMN_1753370	-0.0579488
ILMN_1744914	-0.0579282
ILMN_1723004	-0.0579061
ILMN_1721605	-0.0578854
ILMN_1759350	-0.0578852
ILMN_1661733	-0.0578605
ILMN_1698166	-0.0578385
ILMN_1651262	-0.057831
ILMN_2404049	-0.0578214
ILMN_1658259	-0.0577821
ILMN_2261600	-0.0577732
ILMN_2090105	-0.0577373
ILMN_1708147	-0.0576456
ILMN_2105923	-0.0576281
ILMN_1699160	-0.0575792
ILMN_1711799	-0.0575705
ILMN_2170353	-0.0575641
ILMN_1731785	-0.0575614
ILMN_1810069	-0.0575551
ILMN_1660624	-0.0575403
ILMN_1682098	-0.0575379
ILMN_1722292	-0.0574685
ILMN_1667060	-0.0574348
ILMN_1763663	-0.0573914
ILMN_1667232	-0.057378
ILMN_1669142	-0.0573668
ILMN_1757387	-0.0573612
ILMN_1769849	-0.0573512
ILMN_1698404	-0.0573082
ILMN_1712413	-0.0573063
ILMN_2136133	-0.057276
ILMN_1775330	-0.0572696
ILMN_2177965	-0.0572689
ILMN_1671250	-0.0572374
ILMN_2169152	-0.0572271
ILMN_2232157	-0.0572256
ILMN_1782084	-0.0571913
ILMN_1697268	-0.0571535
ILMN_1741997	-0.0571416
ILMN_1812973	-0.0571349
ILMN_1692163	-0.0571203
ILMN_1698225	-0.0571199
ILMN_1813389	-0.0571158
ILMN_1739756	-0.0570888
ILMN_1765621	-0.0570858
ILMN_1773380	-0.0570852
ILMN_2123743	-0.057053
ILMN_1758906	-0.0570512
ILMN_2193591	-0.0569858
ILMN_1654068	-0.0569814
ILMN_1666757	-0.0569687
ILMN_1714809	-0.0569577
ILMN_1690241	-0.0568413
ILMN_1715908	-0.0567957
ILMN_1744963	-0.056734
ILMN_1716157	-0.0566991
ILMN_1738523	-0.0566925
ILMN_2112402	-0.0566587
ILMN_1709044	-0.0566484
ILMN_1651365	-0.0566404
ILMN_2128128	-0.0566274
ILMN_1722239	-0.0566208
ILMN_1706645	-0.0565311
ILMN_1677509	-0.056525
ILMN_1801205	-0.0565148
ILMN_2205211	-0.0565092
ILMN_1657347	-0.0565
ILMN_1661577	-0.0564757
ILMN_1765258	-0.0564725
ILMN_2232712	-0.0564465
ILMN_2286400	-0.0564245
ILMN_2289093	-0.0564219
ILMN_1792712	-0.0564106
ILMN_2193706	-0.0564028
ILMN_2275803	-0.0563643
ILMN_1657095	-0.0562947
ILMN_2221046	-0.0562895
ILMN_1755582	-0.0562834
ILMN_1792518	-0.056267
ILMN_2070300	-0.0562663
ILMN_2112357	-0.056256
ILMN_1782129	-0.0562468
ILMN_1654322	-0.0562419
ILMN_2067370	-0.0562417
ILMN_1796013	-0.0562384
ILMN_1656057	-0.0562312
ILMN_1767324	-0.0562252
ILMN_1809010	-0.0561887
ILMN_1761044	-0.0561785
ILMN_1747451	-0.0561598
ILMN_2368188	-0.0561489
ILMN_1779257	-0.056098
ILMN_1684349	-0.0560813
ILMN_1651506	-0.0560425
ILMN_1695276	-0.0560357
ILMN_1809047	-0.0560337
ILMN_1743032	-0.0560114
ILMN_1776674	-0.0560086
ILMN_1765532	-0.0559863
ILMN_1696975	-0.05598
ILMN_1784294	-0.0559749
ILMN_1813344	-0.0559705
ILMN_1673676	-0.05597
ILMN_1721116	-0.0559538
ILMN_1688178	-0.0559525
ILMN_1722186	-0.055934
ILMN_1721977	-0.0558879
ILMN_1804339	-0.055872
ILMN_1657949	-0.0558644
ILMN_1732967	-0.0558522
ILMN_1717868	-0.0558507
ILMN_2087528	-0.0558322
ILMN_1674063	-0.0558264
ILMN_1790136	-0.0558205
ILMN_1750805	-0.0558015
ILMN_1700671	-0.0557672
ILMN_1694596	-0.0557631
ILMN_1677693	-0.0557589
ILMN_1811049	-0.0557512
ILMN_1794560	-0.0557107
ILMN_2398107	-0.0556365
ILMN_2046073	-0.0556187
ILMN_2210129	-0.0556019
ILMN_2184640	-0.0555928
ILMN_2170949	-0.0555632
ILMN_1751572	-0.0555624
ILMN_1711573	-0.0555601
ILMN_1732150	-0.0555559
ILMN_2322996	-0.0554853
ILMN_1801378	-0.0554754
ILMN_2367070	-0.055455
ILMN_2375879	-0.0554213
ILMN_1693334	-0.0554086
ILMN_2330948	-0.0554039
ILMN_1779404	-0.0553827
ILMN_1651936	-0.0553599
ILMN_1706149	-0.0553352
ILMN_1664167	-0.0552753
ILMN_1812392	-0.0552624
ILMN_1769782	-0.0552466
ILMN_1682312	-0.0552406
ILMN_2082324	-0.0552351
ILMN_1727194	-0.0552265
ILMN_1811909	-0.0551842
ILMN_2176063	-0.0551575
ILMN_1659990	-0.0551381
ILMN_1815682	-0.0551029
ILMN_1690066	-0.0551019
ILMN_1760347	-0.0550582
ILMN_1774733	-0.0550053
ILMN_1664233	-0.0549879
ILMN_1908824	-0.0549824
ILMN_1727284	-0.0549808
ILMN_1712975	-0.054971
ILMN_2366334	-0.0549253
ILMN_1673682	-0.0549001
ILMN_1710216	-0.0548983
ILMN_1797975	-0.0548935
ILMN_1669303	-0.0548833
ILMN_2049536	-0.0548773
ILMN_1754860	-0.054856
ILMN_1750101	-0.054827
ILMN_1667295	-0.0548238
ILMN_1804415	-0.0547974
ILMN_2260991	-0.054789
ILMN_1682501	-0.0547835
ILMN_1704056	-0.0547387
ILMN_1898124	-0.0547034
ILMN_2164242	-0.0546999
ILMN_1661554	-0.0546938
ILMN_1684563	-0.0546699
ILMN_1758816	-0.0546691
ILMN_1702447	-0.0546651
ILMN_1654671	-0.0546569
ILMN_1742789	-0.0546543
ILMN_1694240	-0.0546464
ILMN_1771599	-0.0546403
ILMN_1807662	-0.0546359
ILMN_1658834	-0.0546068
ILMN_1705301	-0.0545608
ILMN_1709937	-0.0545586
ILMN_1784706	-0.0545149
ILMN_1691731	-0.0545079
ILMN_1796430	-0.0545028
ILMN_1729157	-0.0545013
ILMN_2346339	-0.0544891
ILMN_1815719	-0.0544876
ILMN_1712708	-0.0544571
ILMN_1663667	-0.0544325
ILMN_1795383	-0.054426
ILMN_2298511	-0.0544222
ILMN_1703593	-0.0544117
ILMN_1745593	-0.0543837
ILMN_1774432	-0.0543507
ILMN_1741165	-0.0543206
ILMN_2400030	-0.0543019
ILMN_1715863	-0.0542963
ILMN_1660661	-0.0542951
ILMN_1714515	-0.0542896
ILMN_1770768	-0.0542347
ILMN_2079004	-0.0542232
ILMN_2356895	-0.0542129
ILMN_1702171	-0.0541858
ILMN_1729832	-0.0541788
ILMN_1774836	-0.0541702
ILMN_1754643	-0.0541106
ILMN_1749213	-0.0540839
ILMN_1886655	-0.0540703
ILMN_2359887	-0.0540688
ILMN_2238928	-0.0540614
ILMN_1738552	-0.0540277
ILMN_1727840	-0.0540208
ILMN_2307883	-0.0540141
ILMN_1768814	-0.0540124
ILMN_1651433	-0.0539905
ILMN_1684802	-0.0539813
ILMN_1838313	-0.0539734
ILMN_1658437	-0.0539493
ILMN_1704253	-0.0539464
ILMN_1657884	-0.0539254
ILMN_1669553	-0.0539151
ILMN_2403965	-0.053907
ILMN_1679867	-0.0539063
ILMN_1696568	-0.0538945
ILMN_1715214	-0.0538654
ILMN_1684887	-0.0538568
ILMN_2227757	-0.0538533
ILMN_2329958	-0.0537389
ILMN_1725121	-0.0537271
ILMN_2115005	-0.0537183
ILMN_1670769	-0.0537026
ILMN_2148913	-0.0536858
ILMN_1695404	-0.0536814
ILMN_1715131	-0.0536628
ILMN_2375418	-0.0536354
ILMN_1689200	-0.0536236
ILMN_1734826	-0.0536091
ILMN_1738767	-0.0535883
ILMN_1654396	-0.0535819
ILMN_1741214	-0.0535799
ILMN_2359907	-0.0535655
ILMN_1668063	-0.0535573
ILMN_1710738	-0.0535511
ILMN_2286334	-0.0535487
ILMN_1803217	-0.0535486
ILMN_2101526	-0.0535467
ILMN_1771462	-0.0535419
ILMN_1706386	-0.0535264
ILMN_2192072	-0.0534763
ILMN_2349129	-0.0534702
ILMN_2349658	-0.0534672
ILMN_1687533	-0.0534577
ILMN_1797933	-0.0534479
ILMN_1690464	-0.053431
ILMN_2323491	-0.0534152
ILMN_1730391	-0.05341
ILMN_1713751	-0.0533916
ILMN_1656361	-0.0533499
ILMN_1744046	-0.0533467
ILMN_1772359	-0.0533301
ILMN_2175912	-0.0533254
ILMN_1659411	-0.0533247
ILMN_1719286	-0.0532985
ILMN_1679280	-0.0532294
ILMN_1730084	-0.0532019
ILMN_1758146	-0.0531906
ILMN_2368585	-0.0531192
ILMN_1805606	-0.0531153
ILMN_1724718	-0.0531085
ILMN_1652505	-0.0530779
ILMN_1675387	-0.0530741
ILMN_2170813	-0.0530699
ILMN_2179652	-0.0529934
ILMN_1708946	-0.0529678
ILMN_1773763	-0.0529629
ILMN_1667925	-0.0529407
ILMN_2328433	-0.0529336
ILMN_1686811	-0.0529299
ILMN_2410713	-0.0529189
ILMN_1762407	-0.0529164
ILMN_1692539	-0.0528714
ILMN_1733831	-0.0528542
ILMN_1660718	-0.0528487
ILMN_1796537	-0.0528486
ILMN_1677085	-0.0528354
ILMN_1720889	-0.0528256
ILMN_1782704	-0.0528125
ILMN_2407124	-0.0527956
ILMN_1716336	-0.0527889
ILMN_1711899	-0.0527817
ILMN_2366445	-0.0527714
ILMN_1775759	-0.0527481
ILMN_2124471	-0.0527161
ILMN_1785831	-0.0527071
ILMN_1711514	-0.0527054
ILMN_1659343	-0.0527037
ILMN_2186597	-0.0527012
ILMN_1772286	-0.0526991
ILMN_1733390	-0.0526986
ILMN_1729987	-0.0526844
ILMN_1805192	-0.0526834
ILMN_2232936	-0.0526673
ILMN_1815890	-0.0526599
ILMN_1796210	-0.0526579
ILMN_1684663	-0.0525809
ILMN_1765520	-0.0525412
ILMN_2357015	-0.0525182
ILMN_2408543	-0.0525045
ILMN_1787815	-0.0525031
ILMN_1770922	-0.0524971
ILMN_1790562	-0.0524863
ILMN_1719165	-0.0524729
ILMN_1734929	-0.0524567
ILMN_2345898	-0.0524518
ILMN_2112811	-0.0524358
ILMN_2318011	-0.0524277
ILMN_1803945	-0.0524266
ILMN_2050617	-0.0524139
ILMN_2038777	-0.0524138
ILMN_1860051	-0.0523804
ILMN_1776337	-0.0523654
ILMN_1813379	-0.0523488
ILMN_2348975	-0.0523439
ILMN_1788457	-0.0523434
ILMN_2365528	-0.0523388
ILMN_1779547	-0.0523362
ILMN_1712430	-0.052331
ILMN_1773337	-0.0523249
ILMN_1771652	-0.0523232
ILMN_1699887	-0.0523217
ILMN_1808110	-0.0523144
ILMN_1678833	-0.0523115
ILMN_1657204	-0.0523111
ILMN_2374340	-0.0522979
ILMN_1811114	-0.0522796
ILMN_2099783	-0.0522722
ILMN_1691341	-0.0522679
ILMN_1751072	-0.0522538
ILMN_1697554	-0.0522532
ILMN_2142284	-0.0522432
ILMN_1718558	-0.0522268
ILMN_1719660	-0.0522256
ILMN_1691156	-0.0522095
ILMN_2078599	-0.0522031
ILMN_1694084	-0.0521914
ILMN_1768393	-0.0521877
ILMN_1739345	-0.0521802
ILMN_1655312	-0.0521708
ILMN_1703246	-0.0521455
ILMN_1735792	-0.0521287
ILMN_1808305	-0.0521181
ILMN_2412214	-0.0520786
ILMN_1736940	-0.0520669
ILMN_1806908	-0.0520598
ILMN_1699082	-0.0520492
ILMN_1678966	-0.0520486
ILMN_1743797	-0.0520347
ILMN_1736847	-0.0520124
ILMN_1781360	-0.0520008
ILMN_1797988	-0.0519625
ILMN_1759341	-0.0519548
ILMN_1728168	-0.0519533
ILMN_1805658	-0.051953
ILMN_2251804	-0.0519499
ILMN_1752249	-0.0519454
ILMN_1724293	-0.0519255
ILMN_2388605	-0.0519094
ILMN_1726873	-0.0519093
ILMN_1680782	-0.0519053
ILMN_1707627	-0.0519047
ILMN_1713985	-0.0518923
ILMN_1684321	-0.0518848
ILMN_2310621	-0.0518814
ILMN_1725338	-0.0518722
ILMN_1798975	-0.0518328
ILMN_1682761	-0.0518136
ILMN_1745447	-0.0518126
ILMN_2082209	-0.0517967
ILMN_2379788	-0.0517788
ILMN_1768284	-0.0517744
ILMN_2269136	-0.0517503
ILMN_2408851	-0.0517229
ILMN_1699570	-0.0516599
ILMN_2367258	-0.0516308
ILMN_2411731	-0.0516306
ILMN_1743097	-0.0516114
ILMN_1734138	-0.0515971
ILMN_1768784	-0.0515962
ILMN_2328280	-0.0515944
ILMN_2347798	-0.0515798
ILMN_1735453	-0.0515727
ILMN_1686254	-0.0515574
ILMN_1715760	-0.0515508
ILMN_2061043	-0.0515496
ILMN_2208903	-0.0514976
ILMN_2406892	-0.0514972
ILMN_1815023	-0.0514969
ILMN_2410826	-0.0514956
ILMN_1773493	-0.0514774
ILMN_1677906	-0.0514621
ILMN_2066124	-0.0514326
ILMN_1713249	-0.0514099
ILMN_1779184	-0.0514049
ILMN_1810992	-0.0514031
ILMN_1773751	-0.0513209
ILMN_2370624	-0.0513036
ILMN_2055700	-0.0512737
ILMN_2071641	-0.0512374
ILMN_1701269	-0.0512299
ILMN_1776260	-0.0512233
ILMN_1714592	-0.0512099
ILMN_1723843	-0.0512072
ILMN_1880052	-0.0511586
ILMN_1804117	-0.0511549
ILMN_2045911	-0.0511465
ILMN_1724479	-0.0511427
ILMN_1738681	-0.0511361
ILMN_2261973	-0.0511303
ILMN_1720344	-0.0510945
ILMN_1779353	-0.051075
ILMN_1809477	-0.0510716
ILMN_1779324	-0.0510658
ILMN_1683664	-0.0509902
ILMN_1717393	-0.0509849
ILMN_1697614	-0.0509781
ILMN_1727740	-0.0509414
ILMN_1778152	-0.05094
ILMN_1707236	-0.0509313
ILMN_1735199	-0.0509284
ILMN_1685928	-0.0509209
ILMN_1750102	-0.0508871
ILMN_2401352	-0.0508354
ILMN_1791057	-0.0508072
ILMN_1703487	-0.0507817
ILMN_2360028	-0.0507796
ILMN_2313434	-0.0507782
ILMN_2334205	-0.0507587
ILMN_1757415	-0.0507376
ILMN_2261627	-0.050734
ILMN_1772132	-0.0507331
ILMN_1797704	-0.0507267
ILMN_1802646	-0.050714
ILMN_1699767	-0.0507076
ILMN_2221808	-0.0506941
ILMN_1813236	-0.0506817
ILMN_2211739	-0.0506783
ILMN_1808713	-0.0506574
ILMN_1698715	-0.0506562
ILMN_1732468	-0.0506385
ILMN_1812776	-0.0506276
ILMN_1652846	-0.0506172
ILMN_1681283	-0.050616
ILMN_1754121	-0.0505898
ILMN_1696316	-0.0505889
ILMN_1746864	-0.0505836
ILMN_1693210	-0.0505826
ILMN_2054392	-0.0505702
ILMN_2056479	-0.0505581
ILMN_1809003	-0.0505521
ILMN_1768394	-0.0505217
ILMN_1753790	-0.0504634
ILMN_1716195	-0.050455
ILMN_2367020	-0.0504419
ILMN_1676191	-0.0504224
ILMN_1716071	-0.050384
ILMN_2305225	-0.0503748
ILMN_1701058	-0.050364
ILMN_1651828	-0.0503583
ILMN_2321416	-0.0503534
ILMN_1700822	-0.0503482
ILMN_1775901	-0.0503368
ILMN_1761939	-0.0503314
ILMN_1720114	-0.0503255
ILMN_1722066	-0.0503252
ILMN_2059294	-0.0503141
ILMN_1708081	-0.0503062
ILMN_2176037	-0.0502877
ILMN_1764043	-0.0502875
ILMN_1739726	-0.0502516
ILMN_1727078	-0.0502393
ILMN_1753340	-0.0502234
ILMN_1764165	-0.0502047
ILMN_1673815	-0.0501977
ILMN_2319000	-0.0501968
ILMN_1785345	-0.0501851
ILMN_2149053	-0.0501681
ILMN_1679476	-0.0501488
ILMN_1674985	-0.0501391
ILMN_1662166	-0.0501328
ILMN_2362858	-0.05013
ILMN_1723287	-0.0501009
ILMN_1671557	-0.0500671
ILMN_1759117	-0.0500664
ILMN_2136089	-0.0500533
ILMN_1654812	-0.0500337
ILMN_1698072	-0.0500255
ILMN_1755077	-0.0499891
ILMN_1814998	-0.0499873
ILMN_2345908	-0.0499822
ILMN_2152131	-0.0499757
ILMN_1689624	-0.049946
ILMN_2360184	-0.0498774
ILMN_1687384	-0.0498604
ILMN_1785336	-0.0498535
ILMN_1775549	-0.049815
ILMN_1662097	-0.0497957
ILMN_1659895	-0.0497906
ILMN_1678629	-0.0497829
ILMN_1746633	-0.0497821
ILMN_2215545	-0.0497799
ILMN_2291619	-0.0497732
ILMN_2150802	-0.0497623
ILMN_1688279	-0.0497484
ILMN_1774062	-0.0497254
ILMN_1760635	-0.0497212
ILMN_1800976	-0.0497035
ILMN_1751120	-0.0497034
ILMN_1777721	-0.0496956
ILMN_2325763	-0.0496862
ILMN_2124352	-0.0496693
ILMN_1695418	-0.0496483
ILMN_1757660	-0.0496383
ILMN_2321064	-0.0496173
ILMN_1793220	-0.0496049
ILMN_1705985	-0.0495961
ILMN_1754865	-0.0495875
ILMN_2372974	-0.0495835
ILMN_2230672	-0.0495739
ILMN_2410540	-0.0495698
ILMN_1762529	-0.0495559
ILMN_2098325	-0.0495365
ILMN_1690420	-0.0495266
ILMN_1682264	-0.0495238
ILMN_1810680	-0.0494948
ILMN_1745005	-0.049486
ILMN_1686664	-0.0494819
ILMN_1761083	-0.0494222
ILMN_1750145	-0.049421
ILMN_2108357	-0.0493879
ILMN_1670158	-0.0493554
ILMN_1811593	-0.0493481
ILMN_1694502	-0.0493461
ILMN_1808395	-0.0493388
ILMN_1788108	-0.0493253
ILMN_1652199	-0.0493004
ILMN_1760741	-0.0492989
ILMN_1738173	-0.0492761
ILMN_1792497	-0.0492669
ILMN_1754178	-0.0492598
ILMN_1774083	-0.049183
ILMN_2197101	-0.0491625
ILMN_1704079	-0.049157
ILMN_1795703	-0.0491497
ILMN_1660270	-0.0491474
ILMN_1744830	-0.0491362
ILMN_1777913	-0.0491131
ILMN_2391976	-0.0491097
ILMN_1835092	-0.0491054
ILMN_2343048	-0.049099
ILMN_1727200	-0.0490976
ILMN_1784352	-0.0490936
ILMN_1731193	-0.0490882
ILMN_2198376	-0.0490778
ILMN_1758827	-0.0490769
ILMN_1694888	-0.0490718
ILMN_1718646	-0.0490574
ILMN_2263718	-0.0490572
ILMN_2066849	-0.0490343
ILMN_1776181	-0.0490166
ILMN_1775036	-0.0490082
ILMN_1765021	-0.0489978
ILMN_1653871	-0.0489912
ILMN_2119297	-0.048975
ILMN_2397294	-0.0489605
ILMN_2063168	-0.0489533
ILMN_1727809	-0.0489517
ILMN_2391912	-0.0489473
ILMN_1803236	-0.0489316
ILMN_1720771	-0.0489289
ILMN_1863994	-0.0489208
ILMN_1747412	-0.0489181
ILMN_2347592	-0.0488981
ILMN_1651692	-0.0488938
ILMN_1734231	-0.0488837
ILMN_2409318	-0.0488743
ILMN_2209515	-0.0488698
ILMN_1674694	-0.0488617
ILMN_1654571	-0.0488419
ILMN_1758674	-0.0488304
ILMN_1796923	-0.0487885
ILMN_2395981	-0.0487745
ILMN_1656145	-0.0487626
ILMN_2215631	-0.0487576
ILMN_1665290	-0.0487349
ILMN_1792072	-0.0487018
ILMN_1761113	-0.0486433
ILMN_1766539	-0.0486339
ILMN_1783621	-0.0486253
ILMN_1800390	-0.0486212
ILMN_1666599	-0.0486168
ILMN_2239774	-0.0486093
ILMN_1683441	-0.0485973
ILMN_1686573	-0.048578
ILMN_1809866	-0.0485636
ILMN_1759344	-0.0485595
ILMN_1775380	-0.0485561
ILMN_1760718	-0.0485309
ILMN_1783563	-0.0485238
ILMN_1776073	-0.0485152
ILMN_2298936	-0.0485046
ILMN_1874530	-0.0484953
ILMN_1809400	-0.04849
ILMN_1694780	-0.0484829
ILMN_2389114	-0.0484816
ILMN_1740160	-0.0484556
ILMN_1682197	-0.0484257
ILMN_1736527	-0.0484116
ILMN_1693552	-0.0483961
ILMN_1772690	-0.048388
ILMN_1673936	-0.0483715
ILMN_1826921	-0.0483579
ILMN_1666594	-0.0483514
ILMN_1789176	-0.0483481
ILMN_1712959	-0.0483266
ILMN_2317658	-0.048324
ILMN_1662741	-0.0483117
ILMN_1699489	-0.048311
ILMN_1674386	-0.0482976
ILMN_1802203	-0.0482876
ILMN_2151818	-0.0482826
ILMN_1769290	-0.0482763
ILMN_1739541	-0.0482682
ILMN_2384122	-0.0482619
ILMN_1705753	-0.0482532
ILMN_2351269	-0.0482484
ILMN_1673252	-0.0482072
ILMN_1652989	-0.048188
ILMN_1702585	-0.0481814
ILMN_2168217	-0.0481766
ILMN_2398489	-0.048174
ILMN_2371700	-0.0481576
ILMN_1684293	-0.0481427
ILMN_1799642	-0.0481366
ILMN_1793302	-0.0481132
ILMN_1686835	-0.048108
ILMN_1656670	-0.0480646
ILMN_1777528	-0.0480596
ILMN_1764201	-0.0480588
ILMN_1716876	-0.0480582
ILMN_1893633	-0.0480539
ILMN_1795561	-0.0480307
ILMN_1742507	-0.0480211
ILMN_1665761	-0.0480206
ILMN_1683658	-0.048011
ILMN_1725105	-0.0479875
ILMN_2342579	-0.0479659
ILMN_1665483	-0.0479628
ILMN_1743579	-0.0479413
ILMN_1738642	-0.0479409
ILMN_1724422	-0.0479212
ILMN_2352097	-0.047913
ILMN_1659800	-0.0479114
ILMN_1769634	-0.0479096
ILMN_2370772	-0.0478787
ILMN_1720124	-0.0478531
ILMN_2353732	-0.0478501
ILMN_1665943	-0.0478452
ILMN_1728435	-0.0478357
ILMN_1811579	-0.0478255
ILMN_1718354	-0.0478226
ILMN_1846922	-0.0478225
ILMN_2352380	-0.0477873
ILMN_1791771	-0.0477806
ILMN_2242937	-0.0477767
ILMN_1768035	-0.0477457
ILMN_1669550	-0.0477075
ILMN_1675852	-0.0476922
ILMN_2366212	-0.0476767
ILMN_1771801	-0.0476693
ILMN_2363498	-0.0476578
ILMN_2089458	-0.0476395
ILMN_2138589	-0.0476204
ILMN_1750008	-0.0476157
ILMN_1725320	-0.0476123
ILMN_1695420	-0.0475836
ILMN_1767135	-0.0475804
ILMN_2311796	-0.047578
ILMN_1687041	-0.0475573
ILMN_1657509	-0.0475555
ILMN_1788254	-0.0475537
ILMN_2282959	-0.0475508
ILMN_1696556	-0.047518
ILMN_1655645	-0.0475078
ILMN_1768016	-0.0475071
ILMN_1651354	-0.0474998
ILMN_1696266	-0.0474949
ILMN_1701911	-0.0474385
ILMN_1757995	-0.047438
ILMN_1657234	-0.0474363
ILMN_2092536	-0.0474151
ILMN_1785795	-0.0474078
ILMN_1690706	-0.0474017
[truncated: 46,804 more rows]

## Sheet: CM1.LuminalB
Probe_ID	CM1 score		Graphs																	Top CM1 score, negative	Probe_ID	Top CM1 score, positive
ILMN_2149164	-0.203283																			-0.203283	ILMN_2149164
ILMN_1666845	-0.186067																			-0.186067	ILMN_1666845
ILMN_1786720	-0.174297																			-0.174297	ILMN_1786720
ILMN_1753101	-0.153362																			-0.153362	ILMN_1753101
ILMN_1729216	-0.153051																			-0.153051	ILMN_1729216
ILMN_1665035	-0.149907																			-0.149907	ILMN_1665035
ILMN_1721354	-0.149746																			-0.149746	ILMN_1721354
ILMN_1766914	-0.145801																			-0.145801	ILMN_1766914
ILMN_1810978	-0.142295																			-0.142295	ILMN_1810978
ILMN_1738401	-0.141179																			-0.141179	ILMN_1738401
ILMN_1795325	-0.139051																			-0.139051	ILMN_1795325
ILMN_1660086	-0.138898																			-0.138898	ILMN_1660086
ILMN_1689146	-0.134035																			-0.134035	ILMN_1689146
ILMN_1723684	-0.132215																			-0.132215	ILMN_1723684
ILMN_2197128	-0.128266																			-0.128266	ILMN_2197128
ILMN_1651282	-0.127834																			-0.127834	ILMN_1651282
ILMN_1677920	-0.127248																			-0.127248	ILMN_1677920
ILMN_1770612	-0.126281																			-0.126281	ILMN_1770612
ILMN_1654072	-0.123542																			-0.123542	ILMN_1654072
ILMN_1801632	-0.121357																			-0.121357	ILMN_1801632
ILMN_1749868	-0.121156																			-0.121156	ILMN_1749868
ILMN_1752899	-0.120846																			-0.120846	ILMN_1752899
ILMN_2105441	-0.119806																			-0.119806	ILMN_2105441
ILMN_1655611	-0.119558																			-0.119558	ILMN_1655611
ILMN_2353054	-0.119215																			-0.119215	ILMN_2353054
ILMN_1690703	-0.118434																				ILMN_1686097	0.127365
ILMN_1752932	-0.118355																				ILMN_1668814	0.128325
ILMN_1741356	-0.118236																				ILMN_1753196	0.129514
ILMN_1717636	-0.117897																				ILMN_1786065	0.129794
ILMN_1778991	-0.117875																				ILMN_1794539	0.130391
ILMN_2114720	-0.117097																				ILMN_1777564	0.13042
ILMN_2223941	-0.116801																				ILMN_2368718	0.130597
ILMN_1715684	-0.115641																				ILMN_2387952	0.131208
ILMN_2163723	-0.115067																				ILMN_1673673	0.131374
ILMN_1720158	-0.11501																				ILMN_2409298	0.131984
ILMN_1702501	-0.114738																				ILMN_2301083	0.132376
ILMN_2304512	-0.113733																				ILMN_2285996	0.133371
ILMN_1679809	-0.112107																				ILMN_2051373	0.134741
ILMN_1778087	-0.111819																				ILMN_2077550	0.137497
ILMN_1738116	-0.108674																				ILMN_1735093	0.137539
ILMN_1758404	-0.108632																				ILMN_1809590	0.138122
ILMN_2076600	-0.108261																				ILMN_1714730	0.139259
ILMN_1740609	-0.108203																				ILMN_2143155	0.139509
ILMN_1706434	-0.108038																				ILMN_1711470	0.139957
ILMN_2326273	-0.107987																				ILMN_2362549	0.143252
ILMN_2410523	-0.107497																				ILMN_1728787	0.143769
ILMN_1670305	-0.107422																				ILMN_1747911	0.144276
ILMN_1668345	-0.107077																				ILMN_1666305	0.145847
ILMN_1704294	-0.106892																				ILMN_1798108	0.155244
ILMN_1723481	-0.10685																				ILMN_1678535	0.180623
ILMN_1654398	-0.106487
ILMN_1774602	-0.106461
ILMN_1793888	-0.106419
ILMN_1712075	-0.106212
ILMN_1652631	-0.105545
ILMN_1700248	-0.105206
ILMN_1754103	-0.10493
ILMN_1848552	-0.104851
ILMN_2304495	-0.104649
ILMN_1767934	-0.10432
ILMN_1685403	-0.104207
ILMN_1668766	-0.103763
ILMN_1782439	-0.1034
ILMN_2390338	-0.103302
ILMN_1782788	-0.103292
ILMN_1754795	-0.103258
ILMN_1651610	-0.102803
ILMN_1676822	-0.102751
ILMN_1780170	-0.102216
ILMN_1732158	-0.102186
ILMN_2193325	-0.102111
ILMN_1657766	-0.102096
ILMN_1664176	-0.102093
ILMN_2139970	-0.102039
ILMN_1767556	-0.101976
ILMN_1781626	-0.101951
ILMN_1653750	-0.101667
ILMN_2192072	-0.101496
ILMN_2305407	-0.101171
ILMN_1661443	-0.100877
ILMN_2063168	-0.100862
ILMN_2379560	-0.100832
ILMN_1672536	-0.100811
ILMN_1652065	-0.100723
ILMN_1790689	-0.100675
ILMN_1678215	-0.100479
ILMN_1688423	-0.100235
ILMN_1802808	-0.100103
ILMN_1755657	-0.100103
ILMN_1658356	-0.100056
ILMN_1671928	-0.100039
ILMN_1705247	-0.0998312
ILMN_1781149	-0.0991346
ILMN_1686573	-0.0989904
ILMN_1769129	-0.0988641
ILMN_1657145	-0.0987015
ILMN_1680874	-0.0983373
ILMN_1808590	-0.0981776
ILMN_1743445	-0.0981016
ILMN_1652199	-0.0980501
ILMN_2309848	-0.0979057
ILMN_2344120	-0.09784
ILMN_1804351	-0.0978387
ILMN_1785424	-0.0978367
ILMN_1801043	-0.0976624
ILMN_1704286	-0.0975068
ILMN_2390919	-0.0975008
ILMN_1803256	-0.0973893
ILMN_1752755	-0.0972606
ILMN_1770290	-0.0971101
ILMN_1754660	-0.0968263
ILMN_2283325	-0.0966247
ILMN_1714159	-0.0964142
ILMN_1715969	-0.0962602
ILMN_1708778	-0.0961429
ILMN_1712684	-0.0960814
ILMN_1666444	-0.0959842
ILMN_2150258	-0.0959706
ILMN_1779558	-0.0958807
ILMN_1664464	-0.0955183
ILMN_1695945	-0.0954843
ILMN_2380237	-0.095447
ILMN_2329914	-0.0953804
ILMN_1684554	-0.0949429
ILMN_1757552	-0.0947478
ILMN_1791226	-0.0945556
ILMN_1718731	-0.0944684
ILMN_1716407	-0.0943372
ILMN_1755173	-0.0942027
ILMN_2339266	-0.0941537
ILMN_1784749	-0.0940991
ILMN_1770800	-0.0940963
ILMN_1676449	-0.0938334
ILMN_1917341	-0.0937884
ILMN_1791447	-0.0937199
ILMN_1774982	-0.093637
ILMN_1738816	-0.0934351
ILMN_1666819	-0.0933606
ILMN_1753613	-0.093352
ILMN_1786598	-0.0926662
ILMN_1809099	-0.0926494
ILMN_2061435	-0.0924434
ILMN_1691860	-0.0921123
ILMN_1682775	-0.0920768
ILMN_1672504	-0.091656
ILMN_1664855	-0.0908978
ILMN_1743103	-0.0908756
ILMN_1686679	-0.0906947
ILMN_1667692	-0.0906187
ILMN_2072568	-0.0906172
ILMN_1801442	-0.0904552
ILMN_1756071	-0.0904153
ILMN_1679268	-0.0903546
ILMN_1708107	-0.0903475
ILMN_1673639	-0.0902028
ILMN_2112638	-0.0902019
ILMN_1788019	-0.0901602
ILMN_1789830	-0.0901509
ILMN_1793476	-0.0900978
ILMN_1813270	-0.0899531
ILMN_1709486	-0.0897875
ILMN_2128428	-0.0897658
ILMN_1787186	-0.0896724
ILMN_2089329	-0.0896247
ILMN_1700081	-0.0893823
ILMN_1713182	-0.0892437
ILMN_1661733	-0.0891972
ILMN_1800091	-0.0890602
ILMN_1773059	-0.0890268
ILMN_1745994	-0.0889697
ILMN_1655595	-0.0888383
ILMN_1672503	-0.0887791
ILMN_1767470	-0.0885677
ILMN_1798006	-0.088485
ILMN_2393765	-0.0882338
ILMN_1812926	-0.0880516
ILMN_1757604	-0.0880499
ILMN_1790160	-0.0880469
ILMN_1778668	-0.0878872
ILMN_2229877	-0.0878324
ILMN_1658835	-0.0878116
ILMN_1728197	-0.0874155
ILMN_1680390	-0.0873902
ILMN_1780255	-0.0870984
ILMN_1679391	-0.0870205
ILMN_1672486	-0.0869638
ILMN_1739508	-0.0869205
ILMN_2371169	-0.0868579
ILMN_2306540	-0.0866366
ILMN_2120695	-0.0865806
ILMN_1770338	-0.0863595
ILMN_1716246	-0.0862417
ILMN_1669553	-0.085971
ILMN_1878029	-0.0858665
ILMN_1741021	-0.0858165
ILMN_2232177	-0.0857584
ILMN_1724789	-0.0857486
ILMN_2184184	-0.0856093
ILMN_1701424	-0.0855216
ILMN_1730487	-0.0854254
ILMN_1805466	-0.0853983
ILMN_1802780	-0.0852773
ILMN_2385672	-0.0850377
ILMN_1796801	-0.0849809
ILMN_2201678	-0.0849672
ILMN_1800697	-0.0848787
ILMN_2396956	-0.0848669
ILMN_1693270	-0.0848347
ILMN_2313901	-0.0847235
ILMN_2346339	-0.0845174
ILMN_1854469	-0.0844343
ILMN_1790859	-0.0843061
ILMN_1699214	-0.084083
ILMN_1715748	-0.0839305
ILMN_1710495	-0.0838613
ILMN_2116299	-0.0838113
ILMN_1809291	-0.0837854
ILMN_1701603	-0.0837601
ILMN_1715647	-0.0837186
ILMN_1787691	-0.0834953
ILMN_1812618	-0.0834503
ILMN_1712046	-0.0834177
ILMN_1752075	-0.0834054
ILMN_2395451	-0.0833666
ILMN_1764309	-0.0832779
ILMN_1762260	-0.0831145
ILMN_1701875	-0.0831069
ILMN_1717990	-0.0831064
ILMN_1681949	-0.0830362
ILMN_1730229	-0.0830044
ILMN_1789196	-0.0828292
ILMN_1695959	-0.0827354
ILMN_1699545	-0.0826591
ILMN_2317580	-0.0826529
ILMN_1758128	-0.0825004
ILMN_1734276	-0.0824352
ILMN_1768425	-0.082418
ILMN_1674160	-0.0821661
ILMN_1714170	-0.0821646
ILMN_1759513	-0.0821585
ILMN_1671969	-0.081976
ILMN_1702073	-0.0818907
ILMN_1812902	-0.0818015
ILMN_2407879	-0.0817611
ILMN_1692223	-0.081713
ILMN_1743620	-0.0816928
ILMN_1769575	-0.0816106
ILMN_1775330	-0.0815635
ILMN_1657373	-0.0815632
ILMN_1751097	-0.0814531
ILMN_1737988	-0.0814331
ILMN_1845086	-0.0813978
ILMN_1654109	-0.0813763
ILMN_1803956	-0.0813639
ILMN_2129161	-0.0812134
ILMN_1807439	-0.0811279
ILMN_1761858	-0.0810907
ILMN_2255133	-0.0810727
ILMN_1730998	-0.0810125
ILMN_2059535	-0.0809996
ILMN_1721626	-0.0809718
ILMN_1659895	-0.0808973
ILMN_1726666	-0.0808916
ILMN_1725276	-0.0808352
ILMN_2167758	-0.0807386
ILMN_1767448	-0.0806963
ILMN_1699585	-0.0806736
ILMN_2205963	-0.0806379
ILMN_1734929	-0.0805692
ILMN_2161820	-0.0805215
ILMN_1781758	-0.0804938
ILMN_1913678	-0.0803395
ILMN_1791890	-0.0802832
ILMN_1703487	-0.0802761
ILMN_1806733	-0.0802167
ILMN_1741688	-0.0801552
ILMN_1805543	-0.080045
ILMN_2103547	-0.0800181
ILMN_1796762	-0.0800036
ILMN_2309245	-0.0798223
ILMN_1808707	-0.0796403
ILMN_2149226	-0.0795728
ILMN_1812795	-0.0794907
ILMN_1783909	-0.0793253
ILMN_1702226	-0.0792635
ILMN_2340259	-0.0792533
ILMN_1726245	-0.0792211
ILMN_2139761	-0.0791797
ILMN_1733851	-0.0791334
ILMN_1733288	-0.0790813
ILMN_1718565	-0.0790755
ILMN_2117171	-0.0790558
ILMN_2086470	-0.0789792
ILMN_1791545	-0.0789076
ILMN_1802615	-0.0789074
ILMN_1709590	-0.0788557
ILMN_1667295	-0.0787803
ILMN_1738684	-0.0787653
ILMN_1776936	-0.078555
ILMN_2367239	-0.0785303
ILMN_1703955	-0.0784524
ILMN_1689456	-0.0783399
ILMN_1791123	-0.0782865
ILMN_1703913	-0.0782348
ILMN_1806533	-0.0782166
ILMN_1806030	-0.0781621
ILMN_1694539	-0.0781024
ILMN_1781388	-0.0780251
ILMN_1692058	-0.078025
ILMN_1719236	-0.077981
ILMN_1801616	-0.0778819
ILMN_1672350	-0.0778803
ILMN_1732151	-0.0778716
ILMN_2138801	-0.0778611
ILMN_1671295	-0.0778597
ILMN_1691476	-0.0778398
ILMN_2065690	-0.0778318
ILMN_1704753	-0.0776978
ILMN_1732799	-0.0775308
ILMN_2326712	-0.0773843
ILMN_1760493	-0.0773503
ILMN_1797342	-0.0772649
ILMN_1775170	-0.0771793
ILMN_1769615	-0.0771762
ILMN_1772910	-0.0771732
ILMN_1814194	-0.0771652
ILMN_1795166	-0.0771624
ILMN_1675979	-0.0770749
ILMN_1795251	-0.0769363
ILMN_1675656	-0.0768965
ILMN_1671149	-0.0768378
ILMN_1729095	-0.0767701
ILMN_2218208	-0.0766232
ILMN_1900520	-0.0765817
ILMN_1803392	-0.0765791
ILMN_1764723	-0.0765331
ILMN_1752247	-0.0764378
ILMN_2161746	-0.076437
ILMN_1676088	-0.0764117
ILMN_1703558	-0.0762198
ILMN_1707434	-0.0761539
ILMN_1723847	-0.0761272
ILMN_1692938	-0.0761077
ILMN_1772869	-0.0760305
ILMN_1778681	-0.0759841
ILMN_1737025	-0.0759061
ILMN_1742382	-0.0758697
ILMN_2317581	-0.0757481
ILMN_2342271	-0.0756771
ILMN_2115125	-0.075597
ILMN_1705231	-0.0755503
ILMN_1798975	-0.0755054
ILMN_1665219	-0.0754572
ILMN_1803236	-0.0753616
ILMN_2170209	-0.0752929
ILMN_1726589	-0.0751676
ILMN_1697448	-0.0749978
ILMN_1778924	-0.0749096
ILMN_1679666	-0.0748932
ILMN_1772261	-0.074891
ILMN_1762899	-0.0748221
ILMN_1756501	-0.0747649
ILMN_1810054	-0.0747544
ILMN_1742332	-0.0747386
ILMN_1699489	-0.0746952
ILMN_1752510	-0.0746886
ILMN_1659936	-0.0746614
ILMN_1660806	-0.0745804
ILMN_1687971	-0.0745016
ILMN_1699829	-0.0743931
ILMN_1741632	-0.0743659
ILMN_1669323	-0.0743075
ILMN_2392274	-0.0741995
ILMN_2058251	-0.074192
ILMN_1808122	-0.0740743
ILMN_1747305	-0.0740658
ILMN_1693650	-0.0740472
ILMN_1751607	-0.0739901
ILMN_1697548	-0.073898
ILMN_2285817	-0.0738655
ILMN_2228180	-0.0737935
ILMN_1679838	-0.0737436
ILMN_1687768	-0.0737316
ILMN_1811921	-0.073598
ILMN_1808501	-0.0735504
ILMN_1809928	-0.0734544
ILMN_2377900	-0.0734133
ILMN_2078697	-0.0733547
ILMN_1671703	-0.0733496
ILMN_1784661	-0.073344
ILMN_1707727	-0.0733099
ILMN_1775587	-0.0732989
ILMN_1705570	-0.0732626
ILMN_1691747	-0.073249
ILMN_1715662	-0.0731684
ILMN_1673320	-0.0731353
ILMN_1715463	-0.0731163
ILMN_2366041	-0.0730936
ILMN_2415189	-0.073086
ILMN_1695290	-0.0730589
ILMN_1676563	-0.0730251
ILMN_1680453	-0.0730152
ILMN_2131177	-0.0729929
ILMN_1807969	-0.0729503
ILMN_1731783	-0.0729009
ILMN_1674228	-0.0728873
ILMN_1799026	-0.0727561
ILMN_1778136	-0.0726696
ILMN_2188264	-0.0726155
ILMN_1685714	-0.0726142
ILMN_1728923	-0.072514
ILMN_1679262	-0.0724318
ILMN_1803825	-0.0723084
ILMN_1805192	-0.0721476
ILMN_2400935	-0.0720292
ILMN_1664294	-0.0720257
ILMN_1687538	-0.0720058
ILMN_1767446	-0.0719622
ILMN_1705066	-0.0719612
ILMN_1730007	-0.0719307
ILMN_1812070	-0.0718473
ILMN_1774087	-0.0718333
ILMN_2088437	-0.0718085
ILMN_1793578	-0.0717578
ILMN_1812968	-0.0716934
ILMN_1713397	-0.0716785
ILMN_2404063	-0.0716745
ILMN_1711439	-0.0716744
ILMN_1728107	-0.0716703
ILMN_1653826	-0.0716592
ILMN_1744487	-0.0716541
ILMN_1713124	-0.0716484
ILMN_1720511	-0.0715474
ILMN_1752810	-0.0715418
ILMN_1711157	-0.0714983
ILMN_1742544	-0.071201
ILMN_1811972	-0.0711802
ILMN_2087692	-0.0711364
ILMN_2160727	-0.0710903
ILMN_2075927	-0.071037
ILMN_2234956	-0.0709873
ILMN_2384241	-0.0709402
ILMN_1745079	-0.0708962
ILMN_1709674	-0.0708947
ILMN_2271149	-0.0708788
ILMN_1777660	-0.0708713
ILMN_1773427	-0.0708609
ILMN_1704665	-0.0708556
ILMN_2229379	-0.0708098
ILMN_2388800	-0.0708094
ILMN_1745130	-0.0707782
ILMN_1700541	-0.070756
ILMN_1657803	-0.0706685
ILMN_2075603	-0.0704746
ILMN_1680339	-0.0704742
ILMN_1748751	-0.0704365
ILMN_1669831	-0.0704282
ILMN_2103761	-0.0704222
ILMN_1659845	-0.0703078
ILMN_1751326	-0.0702796
ILMN_1810852	-0.0702697
ILMN_1710075	-0.0702599
ILMN_2129234	-0.0702324
ILMN_1676897	-0.0702078
ILMN_1808713	-0.0700437
ILMN_1784459	-0.0700375
ILMN_1730101	-0.0699805
ILMN_2178587	-0.0698862
ILMN_1693338	-0.0698291
ILMN_1707124	-0.0698277
ILMN_1786197	-0.0698143
ILMN_1775405	-0.0697899
ILMN_2358540	-0.0697521
ILMN_1757872	-0.0697306
ILMN_1727479	-0.069705
ILMN_1801504	-0.0696238
ILMN_1791057	-0.06961
ILMN_1706483	-0.0695806
ILMN_1775016	-0.0695442
ILMN_2401978	-0.0695081
ILMN_1778723	-0.0694893
ILMN_2408683	-0.0694521
ILMN_1717934	-0.0694461
ILMN_1654319	-0.069439
ILMN_1855278	-0.0694327
ILMN_2066151	-0.0692897
ILMN_2366212	-0.0692696
ILMN_2412336	-0.0692423
ILMN_1763891	-0.0692193
ILMN_1796912	-0.0692037
ILMN_1811779	-0.0691902
ILMN_1671891	-0.0691269
ILMN_1775285	-0.0691232
ILMN_1724718	-0.0691101
ILMN_1670490	-0.0690545
ILMN_1794829	-0.0690543
ILMN_2402817	-0.0690521
ILMN_1736760	-0.0690309
ILMN_1675062	-0.0689888
ILMN_1810725	-0.068862
ILMN_1733333	-0.0687528
ILMN_1755822	-0.0687215
ILMN_1708580	-0.0687207
ILMN_2114422	-0.0686653
ILMN_2334210	-0.0685949
ILMN_1745570	-0.0684608
ILMN_1763127	-0.0684579
ILMN_1677092	-0.0684368
ILMN_1761968	-0.0683649
ILMN_1713813	-0.0683467
ILMN_1740005	-0.0682223
ILMN_1770673	-0.0681684
ILMN_1701551	-0.068119
ILMN_1807493	-0.0681059
ILMN_1661695	-0.0680661
ILMN_2357361	-0.0680524
ILMN_1671554	-0.0679607
ILMN_1708041	-0.0678661
ILMN_1735156	-0.0678635
ILMN_1731561	-0.0678196
ILMN_2383349	-0.0677366
ILMN_1751559	-0.0677309
ILMN_1694325	-0.0676939
ILMN_1726786	-0.0676054
ILMN_2092077	-0.0675461
ILMN_1664912	-0.0675266
ILMN_1743933	-0.0674981
ILMN_1671809	-0.0674671
ILMN_1752520	-0.0674073
ILMN_2309156	-0.0673762
ILMN_2332553	-0.0673578
ILMN_1728478	-0.0673419
ILMN_1787461	-0.0673375
ILMN_2324002	-0.0672976
ILMN_1748840	-0.0672685
ILMN_2054297	-0.0672532
ILMN_1808898	-0.0671732
ILMN_1713636	-0.0671339
ILMN_1783889	-0.0671184
ILMN_1724139	-0.0670858
ILMN_2228162	-0.0670836
ILMN_1773470	-0.0669254
ILMN_1727098	-0.0668985
ILMN_1726809	-0.0668681
ILMN_1779071	-0.0668286
ILMN_1694548	-0.0667949
ILMN_2387712	-0.0667075
ILMN_1810559	-0.0666738
ILMN_1749009	-0.0666569
ILMN_1815121	-0.0666545
ILMN_1709479	-0.0666309
ILMN_2188521	-0.0666244
ILMN_1652185	-0.0666122
ILMN_1707070	-0.0665613
ILMN_1750748	-0.066539
ILMN_2041788	-0.0664592
ILMN_1745299	-0.0664296
ILMN_1803213	-0.0663922
ILMN_1792384	-0.0663079
ILMN_1771688	-0.0662735
ILMN_1698605	-0.0662238
ILMN_1701347	-0.0662144
ILMN_1705685	-0.066179
ILMN_2367883	-0.0661628
ILMN_1775734	-0.0661377
ILMN_1698020	-0.0660868
ILMN_1681703	-0.0660201
ILMN_1802646	-0.0659864
ILMN_1677198	-0.0659855
ILMN_2238302	-0.0659752
ILMN_1790052	-0.0659647
ILMN_2056606	-0.0659468
ILMN_2341229	-0.0659408
ILMN_2401258	-0.0658977
ILMN_1810782	-0.0658817
ILMN_1734878	-0.0658698
ILMN_1691376	-0.0658587
ILMN_1721876	-0.065849
ILMN_2361862	-0.0658439
ILMN_1701007	-0.0657677
ILMN_1666502	-0.0657121
ILMN_1685005	-0.0656801
ILMN_1688630	-0.0656621
ILMN_1872404	-0.0655363
ILMN_1651254	-0.0654318
ILMN_1656951	-0.0654222
ILMN_1719753	-0.0653963
ILMN_1680774	-0.0653888
ILMN_2342579	-0.0653264
ILMN_2179083	-0.0652548
ILMN_1682332	-0.0652521
ILMN_1743034	-0.0652079
ILMN_2086077	-0.0651678
ILMN_1772612	-0.0651626
ILMN_1780799	-0.0651299
ILMN_1751576	-0.0650802
ILMN_1693594	-0.0650373
ILMN_1720829	-0.0650082
ILMN_1757338	-0.0649851
ILMN_1813275	-0.0649659
ILMN_1748538	-0.0648775
ILMN_1749372	-0.0647694
ILMN_1677429	-0.0647565
ILMN_1667966	-0.0647201
ILMN_1674533	-0.06467
ILMN_1766261	-0.0646437
ILMN_2387105	-0.064638
ILMN_1695924	-0.0646368
ILMN_1771800	-0.0646045
ILMN_1739222	-0.064563
ILMN_2357577	-0.0645504
ILMN_1726030	-0.0644791
ILMN_1721136	-0.0644319
ILMN_1664861	-0.0643686
ILMN_1718295	-0.0642785
ILMN_1666122	-0.064258
ILMN_1675939	-0.0642214
ILMN_2106902	-0.0642117
ILMN_1699980	-0.064141
ILMN_1696643	-0.0641242
ILMN_1773459	-0.0640997
ILMN_2116877	-0.0640805
ILMN_2150654	-0.064028
ILMN_1740010	-0.0639539
ILMN_2364768	-0.0639176
ILMN_1746676	-0.0639067
ILMN_1730223	-0.0638466
ILMN_2148527	-0.0638278
ILMN_1704730	-0.0638216
ILMN_1765557	-0.0638106
ILMN_1803398	-0.0638022
ILMN_2234187	-0.0637956
ILMN_1743373	-0.0637557
ILMN_2139125	-0.0637448
ILMN_2090351	-0.0637122
ILMN_1735438	-0.0637064
ILMN_1668039	-0.0636972
ILMN_1810797	-0.0635616
ILMN_1810172	-0.0635417
ILMN_1683980	-0.0635256
ILMN_1782538	-0.0635175
ILMN_1784287	-0.0634958
ILMN_1709683	-0.0634945
ILMN_1661537	-0.0634578
ILMN_1773006	-0.0634524
ILMN_1815719	-0.0634394
ILMN_2095133	-0.063425
ILMN_1678353	-0.0633921
ILMN_1698934	-0.0633196
ILMN_1713990	-0.0633166
ILMN_2412192	-0.0633034
ILMN_1653203	-0.0632757
ILMN_1802292	-0.0632706
ILMN_1776327	-0.0632408
ILMN_1736112	-0.0632306
ILMN_2309926	-0.0631925
ILMN_1911503	-0.0631819
ILMN_1911721	-0.0631502
ILMN_1687074	-0.063127
ILMN_2132809	-0.0631265
ILMN_1800787	-0.0631165
ILMN_1716815	-0.0631024
ILMN_1709101	-0.06308
ILMN_2335754	-0.0630598
ILMN_1692020	-0.0630534
ILMN_1712305	-0.0630367
ILMN_1687757	-0.0630332
ILMN_1808011	-0.0630139
ILMN_1729801	-0.0630075
ILMN_1658494	-0.0629981
ILMN_1815057	-0.0629027
ILMN_1861376	-0.0629007
ILMN_1732343	-0.0628737
ILMN_1758497	-0.0628343
ILMN_1776181	-0.0628061
ILMN_1739576	-0.0628043
ILMN_1671404	-0.0627793
ILMN_1733841	-0.0627485
ILMN_2332691	-0.0627181
ILMN_1900263	-0.062694
ILMN_1702829	-0.0626936
ILMN_1681103	-0.0626702
ILMN_2141482	-0.0626691
ILMN_1764228	-0.0626505
ILMN_1686555	-0.0626328
ILMN_1668092	-0.0626195
ILMN_1688152	-0.0626123
ILMN_1745077	-0.0625327
ILMN_2249920	-0.0625236
ILMN_1727633	-0.0624812
ILMN_1703477	-0.0624744
ILMN_1807169	-0.0624418
ILMN_2404065	-0.0624372
ILMN_2148668	-0.0624351
ILMN_1705258	-0.062426
ILMN_1671046	-0.0623965
ILMN_2373791	-0.0623954
ILMN_1683470	-0.0623429
ILMN_1680344	-0.0623336
ILMN_1661335	-0.0623231
ILMN_1764964	-0.0622682
ILMN_1744937	-0.0622512
ILMN_1655904	-0.0621829
ILMN_2415303	-0.0621822
ILMN_1751572	-0.0621438
ILMN_1702858	-0.0620404
ILMN_1750974	-0.0619581
ILMN_2347145	-0.0619371
ILMN_1735220	-0.0619297
ILMN_2352190	-0.061893
ILMN_1795495	-0.0617131
ILMN_1708098	-0.0616007
ILMN_1736078	-0.0615933
ILMN_2099301	-0.0615568
ILMN_1717046	-0.0615459
ILMN_1775708	-0.0614999
ILMN_1677505	-0.0614926
ILMN_2315979	-0.061483
ILMN_1799098	-0.0614538
ILMN_1654210	-0.0614425
ILMN_2174437	-0.0614224
ILMN_1772627	-0.0613927
ILMN_1865764	-0.0613814
ILMN_1782098	-0.0613385
ILMN_1731287	-0.0613181
ILMN_2111237	-0.0613008
ILMN_1678170	-0.061292
ILMN_1789639	-0.0612511
ILMN_2067269	-0.0612481
ILMN_1713561	-0.0611807
ILMN_1682778	-0.061136
ILMN_1662619	-0.0610777
ILMN_1653856	-0.0610562
ILMN_1677261	-0.0610444
ILMN_1802654	-0.0610391
ILMN_2051684	-0.0610008
ILMN_1691341	-0.0609719
ILMN_1702447	-0.0609718
ILMN_1716057	-0.0608862
ILMN_2389876	-0.0608831
ILMN_1796734	-0.0608607
ILMN_1789492	-0.060753
ILMN_1743199	-0.0605719
ILMN_1712112	-0.0605708
ILMN_1753312	-0.0605433
ILMN_1664094	-0.0605408
ILMN_1719759	-0.0605254
ILMN_2169761	-0.060517
ILMN_1729225	-0.0604746
ILMN_1679797	-0.0604723
ILMN_1698038	-0.0604045
ILMN_2396020	-0.0604029
ILMN_1775486	-0.0603976
ILMN_1760667	-0.0603877
ILMN_1903914	-0.0603859
ILMN_2396875	-0.0603719
ILMN_1743367	-0.0603687
ILMN_1713686	-0.0603221
ILMN_1865056	-0.0603182
ILMN_1714965	-0.0603104
ILMN_1760778	-0.0602754
ILMN_1739582	-0.0602503
ILMN_2142185	-0.0602403
ILMN_1788108	-0.0602157
ILMN_1685580	-0.060026
ILMN_1728785	-0.0600014
ILMN_1776678	-0.0599879
ILMN_1697971	-0.0597031
ILMN_1653494	-0.059645
ILMN_1731107	-0.059599
ILMN_1682781	-0.0595952
ILMN_2228938	-0.0595852
ILMN_1683194	-0.0595181
ILMN_1675448	-0.0594334
ILMN_1671365	-0.0593852
ILMN_1656248	-0.0593848
ILMN_1701998	-0.0593419
ILMN_2121068	-0.0593235
ILMN_1740426	-0.0593176
ILMN_2359698	-0.059305
ILMN_1760303	-0.0592984
ILMN_1766264	-0.0592879
ILMN_1716465	-0.059267
ILMN_1746888	-0.0592372
ILMN_1736911	-0.0591938
ILMN_1703412	-0.0591274
ILMN_2148944	-0.0590981
ILMN_1727577	-0.0590878
ILMN_1811313	-0.0590674
ILMN_1772702	-0.0590634
ILMN_1660114	-0.0590578
ILMN_1800412	-0.0590177
ILMN_1764970	-0.0589785
ILMN_1799105	-0.0589496
ILMN_1724686	-0.0589226
ILMN_1795930	-0.0589091
ILMN_1789596	-0.0589061
ILMN_1795835	-0.0588651
ILMN_1747160	-0.0588198
ILMN_1783276	-0.0588108
ILMN_1681526	-0.0587867
ILMN_1753931	-0.0587566
ILMN_2396672	-0.058744
ILMN_1683678	-0.0587326
ILMN_1734830	-0.0587185
ILMN_1768812	-0.0587082
ILMN_1788468	-0.0587051
ILMN_2075757	-0.0586684
ILMN_2170814	-0.0585884
ILMN_1749044	-0.0585785
ILMN_1684357	-0.0585544
ILMN_1658709	-0.0584885
ILMN_1728550	-0.0584697
ILMN_1788942	-0.0584625
ILMN_1776151	-0.0584513
ILMN_2219002	-0.0584343
ILMN_1678454	-0.0583933
ILMN_1773389	-0.0583521
ILMN_1780825	-0.0583197
ILMN_1660125	-0.0583179
ILMN_2073446	-0.0583122
ILMN_1722898	-0.0582963
ILMN_1722294	-0.0582879
ILMN_1732296	-0.0582607
ILMN_1666076	-0.0582209
ILMN_2343097	-0.0582178
ILMN_2330170	-0.0582143
ILMN_1746085	-0.0582081
ILMN_1818346	-0.0581934
ILMN_1729476	-0.058077
ILMN_1667081	-0.0580651
ILMN_2308582	-0.0580319
ILMN_1699695	-0.0580078
ILMN_2151281	-0.0579852
ILMN_1784294	-0.0579651
ILMN_2107613	-0.057929
ILMN_1806403	-0.0579094
ILMN_1779875	-0.0578994
ILMN_1671092	-0.057827
ILMN_1680948	-0.0578219
ILMN_1725534	-0.0577848
ILMN_1722713	-0.0577787
ILMN_2067656	-0.0577542
ILMN_1778240	-0.0577441
ILMN_1721283	-0.0577436
ILMN_1655468	-0.057728
ILMN_1778173	-0.0576996
ILMN_1748844	-0.0576583
ILMN_1690034	-0.0576539
ILMN_1680274	-0.0576464
ILMN_1805737	-0.0576354
ILMN_1787265	-0.0576151
ILMN_2230025	-0.0576018
ILMN_1741755	-0.0575852
ILMN_1768940	-0.0575844
ILMN_1750400	-0.0575621
ILMN_2113490	-0.0575547
ILMN_1703433	-0.0575486
ILMN_1659800	-0.057516
ILMN_1680424	-0.0574862
ILMN_1763207	-0.0574823
ILMN_1690846	-0.0574615
ILMN_2094875	-0.0574579
ILMN_1785891	-0.0574439
ILMN_1762764	-0.0573993
ILMN_1766000	-0.057377
ILMN_1734653	-0.0573676
ILMN_1702105	-0.0573499
ILMN_2413158	-0.0573377
ILMN_1788538	-0.057333
ILMN_2139396	-0.0573246
ILMN_2350183	-0.0572946
ILMN_2082244	-0.0572179
ILMN_1749792	-0.0572073
ILMN_1774265	-0.0572019
ILMN_2214098	-0.0571559
ILMN_1669523	-0.0571407
ILMN_2414568	-0.0571152
ILMN_2399300	-0.0571025
ILMN_2064606	-0.0570974
ILMN_2189027	-0.0570656
ILMN_1706643	-0.0570582
ILMN_1805448	-0.0570391
ILMN_1715173	-0.0569936
ILMN_2075189	-0.0569826
ILMN_1698258	-0.0569803
ILMN_1786823	-0.0569701
ILMN_1725241	-0.0569481
ILMN_1890614	-0.0569179
ILMN_2089752	-0.0569098
ILMN_1653283	-0.056909
ILMN_1798620	-0.0568892
ILMN_1673566	-0.0568742
ILMN_1723768	-0.0568736
ILMN_2120210	-0.0568702
ILMN_2135258	-0.0568691
ILMN_1705783	-0.056865
ILMN_1789600	-0.0568573
ILMN_1757129	-0.0568288
ILMN_1738075	-0.0567472
ILMN_1753547	-0.0567398
ILMN_2133996	-0.0566965
ILMN_1802708	-0.056696
ILMN_1689111	-0.0566535
ILMN_1741594	-0.0566162
ILMN_1748881	-0.0565979
ILMN_2211065	-0.0565962
ILMN_2343278	-0.0565738
ILMN_1684108	-0.0564903
ILMN_1782050	-0.0564364
ILMN_1695880	-0.056406
ILMN_2179717	-0.0563951
ILMN_1687652	-0.0563874
ILMN_1655137	-0.0563802
ILMN_1657683	-0.0563588
ILMN_1809101	-0.0563516
ILMN_1700428	-0.056305
ILMN_1725791	-0.0562955
ILMN_1720941	-0.0562922
ILMN_2344298	-0.0562912
ILMN_1797009	-0.0562871
ILMN_1714741	-0.0562854
ILMN_2175075	-0.0562823
ILMN_1679483	-0.0562666
ILMN_1796423	-0.0561823
ILMN_1663575	-0.0561719
ILMN_1677018	-0.0561247
ILMN_1714523	-0.0560973
ILMN_1723358	-0.0560776
ILMN_2345292	-0.0560645
ILMN_1798288	-0.0560431
ILMN_2334042	-0.0559395
ILMN_1864685	-0.0559154
ILMN_1705630	-0.0558355
ILMN_1856480	-0.0557826
ILMN_1808245	-0.0557719
ILMN_1655261	-0.0557638
ILMN_1839019	-0.0556549
ILMN_1791912	-0.0556514
ILMN_1652223	-0.0556339
ILMN_1814044	-0.0556284
ILMN_1768480	-0.0556123
ILMN_1704014	-0.0556089
ILMN_1765880	-0.055559
ILMN_1685387	-0.0555406
ILMN_1672605	-0.0555244
ILMN_2403247	-0.0555022
ILMN_1769383	-0.0554824
ILMN_1694840	-0.0554821
ILMN_1707312	-0.0554667
ILMN_1678692	-0.0554121
ILMN_1763036	-0.0554083
ILMN_1789733	-0.0554015
ILMN_1729161	-0.0553958
ILMN_2386008	-0.0553693
ILMN_1684391	-0.0553584
ILMN_2055523	-0.0552819
ILMN_1716678	-0.0552723
ILMN_1677038	-0.0552492
ILMN_1788184	-0.0552351
ILMN_1695299	-0.0552216
ILMN_1656378	-0.0552102
ILMN_1792363	-0.0552097
ILMN_1693192	-0.0552031
ILMN_1909770	-0.0552023
ILMN_2360415	-0.0551999
ILMN_1674817	-0.0551822
ILMN_1796180	-0.0551609
ILMN_1680579	-0.0551481
ILMN_1693218	-0.055082
ILMN_1799600	-0.0550695
ILMN_1685441	-0.0550667
ILMN_2396991	-0.0550646
ILMN_2060413	-0.0550387
ILMN_2061565	-0.0550359
ILMN_1653133	-0.0550017
ILMN_2317543	-0.0549437
ILMN_1678842	-0.054925
ILMN_1654552	-0.0548843
ILMN_1810910	-0.054859
ILMN_1726210	-0.0548416
ILMN_1660549	-0.0548044
ILMN_1700042	-0.0548018
ILMN_1705064	-0.0547972
ILMN_1858599	-0.0547676
ILMN_1758633	-0.0547473
ILMN_1789599	-0.0547272
ILMN_1695311	-0.0547159
ILMN_2348268	-0.0547
ILMN_2368834	-0.0546059
ILMN_1795442	-0.0545494
ILMN_1803429	-0.0545369
ILMN_1787526	-0.0545258
ILMN_1684051	-0.0545197
ILMN_2360784	-0.0545138
ILMN_1765363	-0.0545037
ILMN_1702973	-0.0545021
ILMN_1665040	-0.054433
ILMN_1805842	-0.0544146
ILMN_2381476	-0.0543861
ILMN_1753823	-0.0543792
ILMN_1798270	-0.0543755
ILMN_1803217	-0.0543703
ILMN_1773352	-0.0543578
ILMN_1778523	-0.0543484
ILMN_1667239	-0.0543233
ILMN_1782922	-0.0542855
ILMN_1695891	-0.0542742
ILMN_1880425	-0.0542705
ILMN_1736154	-0.0542078
ILMN_1796737	-0.0541919
ILMN_2369603	-0.0541851
ILMN_1717393	-0.0541585
ILMN_1735827	-0.0541193
ILMN_1668526	-0.0541103
ILMN_2415748	-0.0540524
ILMN_2182148	-0.0540149
ILMN_1698725	-0.0539664
ILMN_1795429	-0.0539625
ILMN_1741054	-0.0539607
ILMN_1686968	-0.0539092
ILMN_1694147	-0.0539015
ILMN_1703852	-0.0538949
ILMN_2052891	-0.0538284
ILMN_2401155	-0.0538047
ILMN_1745991	-0.0537788
ILMN_1736704	-0.0537687
ILMN_1776363	-0.0537283
ILMN_1699472	-0.0537203
ILMN_1765558	-0.0536902
ILMN_1696585	-0.0536692
ILMN_1755710	-0.0536479
ILMN_1702636	-0.053643
ILMN_2350122	-0.053636
ILMN_2194577	-0.0536109
ILMN_1785852	-0.0535798
ILMN_2162819	-0.0535242
ILMN_1824362	-0.0534874
ILMN_2216582	-0.0534564
ILMN_2257607	-0.0534537
ILMN_2128931	-0.0534524
ILMN_1809850	-0.0534042
ILMN_1787981	-0.0534017
ILMN_1677603	-0.053378
ILMN_1808777	-0.0533433
ILMN_1713156	-0.0533257
ILMN_1689431	-0.0532603
ILMN_2261784	-0.053247
ILMN_1810420	-0.0532087
ILMN_1765446	-0.0531771
ILMN_1795507	-0.0531706
ILMN_2174805	-0.0531521
ILMN_2206746	-0.0531475
ILMN_1727466	-0.0531446
ILMN_1759792	-0.0531122
ILMN_1697880	-0.0531038
ILMN_2275098	-0.0530954
ILMN_2357134	-0.0530531
ILMN_1718182	-0.0530519
ILMN_1778226	-0.0530228
ILMN_1671151	-0.0530159
ILMN_1657435	-0.0530112
ILMN_2082585	-0.0529909
ILMN_2089977	-0.0529074
ILMN_1811598	-0.0529002
ILMN_2400947	-0.052881
ILMN_1676099	-0.0528693
ILMN_1744212	-0.0528681
ILMN_1710906	-0.0528567
ILMN_1702691	-0.0528478
ILMN_1796712	-0.0528381
ILMN_2186983	-0.0527574
ILMN_1843330	-0.0527265
ILMN_1813179	-0.0527238
ILMN_1807050	-0.0527183
ILMN_1772876	-0.0527106
ILMN_1669362	-0.0526888
ILMN_1677885	-0.0526885
ILMN_1679194	-0.0526858
ILMN_1715452	-0.0525775
ILMN_1821176	-0.052519
ILMN_1715189	-0.0525187
ILMN_1760314	-0.0525147
ILMN_1705442	-0.0524929
ILMN_2307861	-0.0524884
ILMN_1715508	-0.0524861
ILMN_1803367	-0.0524787
ILMN_1655405	-0.0524761
ILMN_1726204	-0.0524639
ILMN_1769433	-0.0524537
ILMN_1781060	-0.0524484
ILMN_1782419	-0.0524455
ILMN_1741003	-0.0524373
ILMN_2052208	-0.0524237
ILMN_1741597	-0.0524178
ILMN_2367753	-0.052398
ILMN_1764109	-0.052394
ILMN_1679929	-0.0523925
ILMN_1668063	-0.0523138
ILMN_1739496	-0.0522868
ILMN_1685433	-0.0521991
ILMN_1683664	-0.0521848
ILMN_1763640	-0.0521808
ILMN_1688098	-0.0521776
ILMN_1907556	-0.0520888
ILMN_2361603	-0.0520491
ILMN_1721657	-0.0520103
ILMN_1795228	-0.0520067
ILMN_1774547	-0.0519859
ILMN_1899407	-0.0519718
ILMN_1800225	-0.0519694
ILMN_1715991	-0.0519528
ILMN_2098616	-0.0519494
ILMN_2311278	-0.0519319
ILMN_2131861	-0.0518776
ILMN_1706015	-0.0518755
ILMN_2197365	-0.0518712
ILMN_1738854	-0.051842
ILMN_1751161	-0.0517763
ILMN_2363658	-0.0517726
ILMN_1680111	-0.0517656
ILMN_1655563	-0.0517551
ILMN_2370882	-0.0517395
ILMN_1783805	-0.0517298
ILMN_1816251	-0.0516995
ILMN_2313851	-0.0516578
ILMN_1654324	-0.0516304
ILMN_1669046	-0.0516089
ILMN_2109416	-0.0515989
ILMN_1741768	-0.051556
ILMN_1750062	-0.051544
ILMN_1751062	-0.0514945
ILMN_1656373	-0.0514719
ILMN_1732197	-0.0514684
ILMN_1672102	-0.0514303
ILMN_2225548	-0.0514301
ILMN_1653934	-0.0513507
ILMN_1776723	-0.0513369
ILMN_1663032	-0.0513141
ILMN_2399769	-0.0513034
ILMN_1689251	-0.0512964
ILMN_2370825	-0.0512955
ILMN_1814526	-0.0512809
ILMN_1663538	-0.0512286
ILMN_1784178	-0.0512191
ILMN_1743241	-0.0512117
ILMN_2169966	-0.0512017
ILMN_1813139	-0.0512003
ILMN_1739393	-0.0511976
ILMN_1764571	-0.0511845
ILMN_1812640	-0.0510762
ILMN_1695276	-0.0510634
ILMN_1701655	-0.0510522
ILMN_1782292	-0.0509888
ILMN_1761322	-0.0509885
ILMN_1704554	-0.0509563
ILMN_1665761	-0.0509262
ILMN_1805606	-0.0509207
ILMN_1670539	-0.0509102
ILMN_1669772	-0.0508996
ILMN_2262444	-0.0508941
ILMN_1706505	-0.0508872
ILMN_2159859	-0.050876
ILMN_1809467	-0.050875
ILMN_1684699	-0.0508546
ILMN_2328378	-0.0508397
ILMN_2353202	-0.0508256
ILMN_1731714	-0.0508111
ILMN_1806023	-0.050732
ILMN_2056087	-0.0507101
ILMN_1795089	-0.0507089
ILMN_2350634	-0.0507039
ILMN_2057573	-0.0506274
ILMN_2056032	-0.050606
ILMN_2196078	-0.0505898
ILMN_1661137	-0.0505489
ILMN_1749846	-0.0505252
ILMN_1690454	-0.0505226
ILMN_1731206	-0.0505222
ILMN_1684155	-0.050517
ILMN_1785660	-0.0505136
ILMN_1762106	-0.0505041
ILMN_1802109	-0.0504815
ILMN_1780898	-0.0504769
ILMN_2320480	-0.0504544
ILMN_1662166	-0.0504049
ILMN_1700183	-0.0503846
ILMN_1733094	-0.0503801
ILMN_1770084	-0.0503765
ILMN_1730082	-0.0503162
ILMN_1687301	-0.0502961
ILMN_1765146	-0.0502922
ILMN_1682636	-0.0502732
ILMN_1745607	-0.0502729
ILMN_1707232	-0.0502703
ILMN_1737089	-0.0502695
ILMN_1699665	-0.0502688
ILMN_1777759	-0.0502278
ILMN_1690839	-0.0502193
ILMN_2327860	-0.0501926
ILMN_1714067	-0.0501897
ILMN_1783956	-0.0501836
ILMN_1691339	-0.0501559
ILMN_1886847	-0.0501084
ILMN_2371724	-0.0501062
ILMN_1658399	-0.050093
ILMN_1699265	-0.0500222
ILMN_1719696	-0.0500109
ILMN_1720501	-0.0500066
ILMN_1682226	-0.0499979
ILMN_2104141	-0.0499911
ILMN_2102330	-0.0499839
ILMN_1755897	-0.0499607
ILMN_1703246	-0.0499496
ILMN_1790338	-0.0499437
ILMN_2307032	-0.04988
ILMN_1663454	-0.0498521
ILMN_1810844	-0.0498466
ILMN_1802611	-0.0498238
ILMN_1706960	-0.0498208
ILMN_1811592	-0.0497645
ILMN_1779706	-0.0497478
ILMN_1684497	-0.0497478
ILMN_1728019	-0.0497378
ILMN_1709348	-0.0497178
ILMN_1656287	-0.0497058
ILMN_1758895	-0.0497027
ILMN_1776157	-0.0496875
ILMN_1768820	-0.0496812
ILMN_1802380	-0.0496358
ILMN_2174127	-0.0496139
ILMN_1843949	-0.0496108
ILMN_1671568	-0.0495834
ILMN_1750800	-0.0495641
ILMN_1763837	-0.0495564
ILMN_2117904	-0.0495496
ILMN_2302757	-0.0495444
ILMN_1719543	-0.0494967
ILMN_1671260	-0.0494618
ILMN_2405684	-0.0494437
ILMN_1701933	-0.0493699
ILMN_1711361	-0.0492722
ILMN_1669390	-0.0492716
ILMN_1782412	-0.0492699
ILMN_2358541	-0.0492689
ILMN_1714700	-0.0492309
ILMN_2380801	-0.0491793
ILMN_1692731	-0.0491624
ILMN_1708934	-0.0491355
ILMN_2376723	-0.0491014
ILMN_1732967	-0.0490582
ILMN_1669617	-0.0490523
ILMN_1664016	-0.0490497
ILMN_1719986	-0.0489789
ILMN_1703946	-0.0489737
ILMN_1720513	-0.0489152
ILMN_1900270	-0.0489087
ILMN_2329429	-0.0488972
ILMN_2374865	-0.048893
ILMN_1752478	-0.0488758
ILMN_1767665	-0.0488756
ILMN_2391150	-0.0488703
ILMN_1740487	-0.0488497
ILMN_1738578	-0.0488397
ILMN_1753525	-0.0488204
ILMN_1738147	-0.0487939
ILMN_1711566	-0.0487566
ILMN_1657361	-0.0486946
ILMN_2405009	-0.0486763
ILMN_2326512	-0.0486541
ILMN_2095610	-0.0486006
ILMN_1789244	-0.0485682
ILMN_1663119	-0.0485361
ILMN_1743130	-0.0485347
ILMN_1780132	-0.0485314
ILMN_1798458	-0.0485042
ILMN_2082314	-0.0484961
ILMN_1654262	-0.0484488
ILMN_1652826	-0.0484299
ILMN_1687501	-0.048413
ILMN_1794442	-0.0483597
ILMN_1661599	-0.0483565
ILMN_1706610	-0.0483399
ILMN_1768469	-0.0483315
ILMN_1668743	-0.0483262
ILMN_1674620	-0.0483187
ILMN_1770818	-0.0482881
ILMN_1790577	-0.0482753
ILMN_2415786	-0.0482661
ILMN_1768016	-0.0482579
ILMN_1673363	-0.0482495
ILMN_2362902	-0.0482303
ILMN_1758315	-0.0482223
ILMN_2205050	-0.0482201
ILMN_1746846	-0.0481992
ILMN_1680996	-0.0481957
ILMN_2353143	-0.0481895
ILMN_1907834	-0.0481329
ILMN_2390162	-0.0480879
ILMN_1703123	-0.0480767
ILMN_1687583	-0.0480747
ILMN_1785439	-0.048031
ILMN_1806908	-0.0479956
ILMN_1701877	-0.0479871
ILMN_1777906	-0.04798
ILMN_1688642	-0.0479748
ILMN_1699931	-0.047928
ILMN_1793859	-0.0479165
ILMN_1813836	-0.0478967
ILMN_1697409	-0.0478936
ILMN_1677829	-0.0478532
ILMN_1709227	-0.0478521
ILMN_1756541	-0.0478322
ILMN_1801441	-0.0477695
ILMN_1660451	-0.047758
ILMN_1735788	-0.0476904
ILMN_1811682	-0.0476878
ILMN_1688103	-0.0476607
ILMN_1815032	-0.0476584
ILMN_1800659	-0.0476576
ILMN_1680856	-0.0476543
ILMN_1753582	-0.0476472
ILMN_1711227	-0.0476301
ILMN_1714335	-0.0476042
ILMN_1844692	-0.0476031
ILMN_1651347	-0.0475916
ILMN_1692261	-0.0475847
ILMN_1671106	-0.0475511
ILMN_1678323	-0.04755
ILMN_2399304	-0.0475239
ILMN_1659599	-0.0475113
ILMN_1720850	-0.0475034
ILMN_1749118	-0.0474706
ILMN_1803094	-0.0474671
ILMN_1790555	-0.0474594
ILMN_1764577	-0.0474047
ILMN_1783149	-0.0473841
ILMN_1771139	-0.0473784
ILMN_1663618	-0.047374
ILMN_1699651	-0.0473604
ILMN_1749011	-0.0473258
ILMN_2189675	-0.0472972
ILMN_2368188	-0.0472865
ILMN_1773337	-0.0472779
ILMN_1658160	-0.0472702
ILMN_1665331	-0.0472677
ILMN_1680104	-0.0472659
ILMN_1651958	-0.0472601
ILMN_1708486	-0.0472493
ILMN_1658569	-0.0472246
ILMN_1773063	-0.0472239
ILMN_1807304	-0.0472179
ILMN_1796925	-0.0472026
ILMN_1686623	-0.047194
ILMN_1695590	-0.0471598
ILMN_1686610	-0.047157
ILMN_2225595	-0.047103
ILMN_1660364	-0.0470739
ILMN_1695947	-0.047066
ILMN_1752199	-0.0470514
ILMN_1766275	-0.0470509
ILMN_1674380	-0.0470274
ILMN_2122103	-0.047025
ILMN_1774077	-0.0470239
ILMN_1769394	-0.0469808
ILMN_2054213	-0.0469688
ILMN_1806752	-0.0469542
ILMN_2395156	-0.0469257
ILMN_1783424	-0.0469039
ILMN_1682139	-0.046896
ILMN_1785202	-0.0468807
ILMN_1801236	-0.0468778
ILMN_2046730	-0.0468621
ILMN_2079655	-0.0468235
ILMN_1723333	-0.046817
ILMN_1730504	-0.0468046
ILMN_1691249	-0.0468027
ILMN_1729288	-0.0467677
ILMN_1781700	-0.0467586
ILMN_1765310	-0.046727
ILMN_1653358	-0.0467263
ILMN_1752526	-0.0466996
ILMN_1676632	-0.0466972
ILMN_2375002	-0.0466729
ILMN_2410929	-0.0466505
ILMN_1698732	-0.0466377
ILMN_1790315	-0.0465364
ILMN_1687848	-0.0465106
ILMN_1770454	-0.0465048
ILMN_1746565	-0.0464767
ILMN_1765109	-0.0464494
ILMN_2071809	-0.046445
ILMN_1737972	-0.0463976
ILMN_1803483	-0.0463746
ILMN_1780334	-0.0463739
ILMN_1870041	-0.0463609
ILMN_1699887	-0.0463571
ILMN_1802023	-0.046345
ILMN_1739161	-0.0462981
ILMN_1679995	-0.0462911
ILMN_1843198	-0.0462851
ILMN_1801223	-0.0462592
ILMN_1814629	-0.0462386
ILMN_2407669	-0.0462258
ILMN_1668683	-0.0462232
ILMN_1651902	-0.0462208
ILMN_1762531	-0.0462018
ILMN_1798533	-0.0461845
ILMN_1760087	-0.0461839
ILMN_1665562	-0.0461768
ILMN_2410986	-0.046158
ILMN_1786429	-0.0461572
ILMN_1715417	-0.0461385
ILMN_2371433	-0.0460905
ILMN_1764266	-0.0460804
ILMN_1652280	-0.0460548
ILMN_1682993	-0.0460506
ILMN_2183856	-0.0460453
ILMN_1709613	-0.046041
ILMN_1737650	-0.046031
ILMN_1655612	-0.0460279
ILMN_1716359	-0.0459507
ILMN_2226917	-0.0459494
ILMN_2125346	-0.0459405
ILMN_2069322	-0.0459321
ILMN_1703866	-0.0459301
ILMN_1736184	-0.0459171
ILMN_2331205	-0.0459097
ILMN_2107184	-0.0459045
ILMN_2376847	-0.045896
ILMN_1892403	-0.0458845
ILMN_2182704	-0.0458837
ILMN_1774617	-0.0458599
ILMN_1663648	-0.0458313
ILMN_2129572	-0.0458162
ILMN_1722872	-0.0458067
ILMN_1667893	-0.0457974
ILMN_2282077	-0.0457669
ILMN_1659490	-0.0457653
ILMN_2098126	-0.0457552
ILMN_1762972	-0.0457368
ILMN_1677946	-0.0456991
ILMN_1721732	-0.045687
ILMN_2357781	-0.0456774
ILMN_1736178	-0.0456677
ILMN_1806408	-0.0456638
ILMN_1886655	-0.0456518
ILMN_1758146	-0.04562
ILMN_1704398	-0.0455963
ILMN_1652677	-0.0455952
ILMN_1674050	-0.0455808
ILMN_1722981	-0.045574
ILMN_1756573	-0.0455619
ILMN_2364272	-0.0455577
ILMN_1804007	-0.0455565
ILMN_1797822	-0.0455505
ILMN_1682799	-0.0455495
ILMN_1800642	-0.0455129
ILMN_2317457	-0.04544
ILMN_1668498	-0.0454277
ILMN_1710937	-0.0454125
ILMN_2077623	-0.0453694
ILMN_2383611	-0.0453689
ILMN_2210934	-0.0453112
ILMN_1684034	-0.045298
ILMN_1708987	-0.0452932
ILMN_1703565	-0.0452924
ILMN_2355831	-0.0452836
ILMN_1727402	-0.0452738
ILMN_1775743	-0.0452674
ILMN_1784320	-0.0452657
ILMN_1742866	-0.0452437
ILMN_1756784	-0.0452326
ILMN_1690064	-0.0452206
ILMN_2358560	-0.0451573
ILMN_1785265	-0.0451524
ILMN_1702487	-0.0451496
ILMN_1735499	-0.0451406
ILMN_1653504	-0.0451404
ILMN_2087080	-0.0451284
ILMN_2379644	-0.0451104
ILMN_1685170	-0.0450711
ILMN_2399264	-0.0450362
ILMN_1760027	-0.0450248
ILMN_1712088	-0.0450059
ILMN_1699925	-0.0450035
ILMN_2367070	-0.0449738
ILMN_1653026	-0.0449431
ILMN_1699574	-0.0449428
ILMN_1811364	-0.044929
ILMN_1682449	-0.0449247
ILMN_1706498	-0.0448987
ILMN_1769810	-0.044842
ILMN_1777378	-0.0448316
ILMN_1672547	-0.0447896
ILMN_1700967	-0.0447721
ILMN_1786168	-0.0447587
ILMN_1708743	-0.0447381
ILMN_1801307	-0.0447255
ILMN_1808114	-0.0446901
ILMN_1740717	-0.0446863
ILMN_1709937	-0.0446855
ILMN_2057479	-0.0446774
ILMN_1737394	-0.0446606
ILMN_1808374	-0.0446423
ILMN_1751656	-0.0446344
ILMN_1786079	-0.0446268
ILMN_1749070	-0.0445949
ILMN_1698259	-0.0445527
ILMN_1803338	-0.044531
ILMN_1815023	-0.0444983
ILMN_1718621	-0.0444975
ILMN_1788961	-0.0444968
ILMN_2062468	-0.044486
ILMN_2373106	-0.0444727
ILMN_2064860	-0.0444429
ILMN_1739847	-0.0444225
ILMN_1812297	-0.0444197
ILMN_1653824	-0.0443777
ILMN_1671154	-0.044363
ILMN_1690945	-0.0443534
ILMN_1683063	-0.044323
ILMN_1694213	-0.0443123
ILMN_1739001	-0.0443064
ILMN_2128967	-0.0442902
ILMN_1729430	-0.0442714
ILMN_1712026	-0.0442482
ILMN_2089616	-0.044246
ILMN_1833858	-0.0442201
ILMN_1689518	-0.0442177
ILMN_1665243	-0.0442083
ILMN_1740512	-0.0441743
ILMN_1740441	-0.0441567
ILMN_1737314	-0.0441483
ILMN_1762294	-0.0441466
ILMN_2212714	-0.0441394
ILMN_1751789	-0.0441259
ILMN_1786353	-0.0441046
ILMN_1743275	-0.0440779
ILMN_2232712	-0.0440502
ILMN_1672660	-0.0440119
ILMN_2110561	-0.0440003
ILMN_1852022	-0.0439136
ILMN_1702396	-0.0439088
ILMN_1678490	-0.0438941
ILMN_1769409	-0.0438814
ILMN_1800276	-0.0438806
ILMN_1781859	-0.0438768
ILMN_1677402	-0.0438474
ILMN_2376205	-0.0438251
ILMN_1790534	-0.0438081
ILMN_1769288	-0.0437859
ILMN_1689585	-0.043785
ILMN_1669033	-0.0437752
ILMN_1704537	-0.0437603
ILMN_1716397	-0.0437486
ILMN_1668592	-0.0437293
ILMN_2381257	-0.0437009
ILMN_1677723	-0.0436553
ILMN_1737611	-0.0436248
ILMN_1760490	-0.0436063
ILMN_2407434	-0.0435909
ILMN_1685052	-0.0435819
ILMN_2206188	-0.0435647
ILMN_1678841	-0.0435514
ILMN_2329773	-0.0435256
ILMN_1705153	-0.0434827
ILMN_1739813	-0.0434458
ILMN_1790098	-0.0434395
ILMN_1799487	-0.0434146
ILMN_1651557	-0.0433948
ILMN_2121408	-0.0433739
ILMN_1657129	-0.0433712
ILMN_2110167	-0.0433557
ILMN_1781155	-0.0433185
ILMN_2082209	-0.0432757
ILMN_2264029	-0.0432427
ILMN_2402392	-0.0432221
ILMN_1748473	-0.0432151
ILMN_2083066	-0.0432
ILMN_1805519	-0.0431813
ILMN_1813685	-0.0431807
ILMN_1765258	-0.04318
ILMN_1709795	-0.0431665
ILMN_1815130	-0.043155
ILMN_1729075	-0.0431329
ILMN_1764788	-0.0430949
ILMN_1665510	-0.0430878
ILMN_1658040	-0.0430852
ILMN_2163873	-0.0430719
ILMN_1669032	-0.0430633
ILMN_1789457	-0.0430516
ILMN_1783448	-0.0430452
ILMN_2087702	-0.0430346
ILMN_1877022	-0.0429777
ILMN_1742547	-0.0429395
ILMN_2136495	-0.0429009
ILMN_2195462	-0.0428995
ILMN_1704985	-0.0428949
ILMN_2317701	-0.0428788
ILMN_1653166	-0.0428671
ILMN_1691071	-0.0428622
ILMN_1735014	-0.0428593
ILMN_1660729	-0.0428407
ILMN_2173919	-0.0428263
ILMN_1676413	-0.0428097
ILMN_1693014	-0.0427988
ILMN_1779182	-0.0427976
ILMN_1684401	-0.0427799
ILMN_2046073	-0.0427772
ILMN_1695946	-0.0427639
ILMN_1674402	-0.0427557
ILMN_1808395	-0.0427556
ILMN_1709549	-0.0427307
ILMN_2078724	-0.0427125
ILMN_1755215	-0.042699
ILMN_1655167	-0.0426918
ILMN_1690476	-0.0426648
ILMN_1704154	-0.0426493
ILMN_1762725	-0.0426488
ILMN_2344650	-0.0426246
ILMN_1684982	-0.0426138
ILMN_1703327	-0.0426128
ILMN_1713751	-0.0425906
ILMN_1727495	-0.0425845
ILMN_1809384	-0.04256
ILMN_1696434	-0.0425508
ILMN_1804673	-0.0425253
ILMN_1651385	-0.0425246
ILMN_1666503	-0.0424906
ILMN_1773079	-0.0424833
ILMN_1709399	-0.0424736
ILMN_1742781	-0.0424645
ILMN_2289844	-0.0424579
ILMN_1656840	-0.0424552
ILMN_2194561	-0.0424498
ILMN_1685917	-0.042435
ILMN_1815679	-0.0424259
ILMN_1810712	-0.0423958
ILMN_1759075	-0.0423705
ILMN_1761409	-0.0423661
ILMN_1713550	-0.0423355
ILMN_2409754	-0.0423283
ILMN_2078995	-0.0423047
ILMN_1679632	-0.0422949
ILMN_1786444	-0.042272
ILMN_1676728	-0.0422444
ILMN_1789463	-0.0422413
ILMN_1722329	-0.0422363
ILMN_1815102	-0.0422327
ILMN_1681983	-0.0422249
ILMN_1800626	-0.0421968
ILMN_1690546	-0.0421889
ILMN_2311796	-0.0421842
ILMN_2087646	-0.0421838
ILMN_1653861	-0.0421705
ILMN_1751143	-0.0421303
ILMN_1802082	-0.0421135
ILMN_2278335	-0.0421106
ILMN_1793672	-0.0420964
ILMN_1675024	-0.0420838
ILMN_1746403	-0.0420645
ILMN_1659761	-0.0420476
ILMN_1900998	-0.0420399
ILMN_1656902	-0.0420377
ILMN_1771376	-0.0420308
ILMN_1716988	-0.0419975
ILMN_2232166	-0.0419674
ILMN_1677607	-0.041955
ILMN_1676663	-0.041953
ILMN_2347068	-0.0419183
ILMN_1718610	-0.041908
ILMN_1775163	-0.0419044
ILMN_1724040	-0.0418633
ILMN_1700762	-0.0418476
ILMN_1789338	-0.041845
ILMN_1788783	-0.0418431
ILMN_1783500	-0.0418176
ILMN_1769412	-0.0418026
ILMN_1695763	-0.0417974
ILMN_1684158	-0.0417883
ILMN_1710434	-0.0417768
ILMN_1726597	-0.0417688
ILMN_1677466	-0.0417652
ILMN_1718769	-0.0417532
ILMN_1759312	-0.0417233
ILMN_1657111	-0.0417201
ILMN_2405602	-0.0417046
ILMN_2326509	-0.0417032
ILMN_1724994	-0.0416862
ILMN_1788315	-0.0416755
ILMN_2302118	-0.0416001
ILMN_1736863	-0.0415933
ILMN_1752914	-0.0415889
ILMN_1656560	-0.0415646
ILMN_2411781	-0.041557
ILMN_1773388	-0.0415368
ILMN_1701308	-0.0415083
ILMN_1762308	-0.0415048
ILMN_1747593	-0.0415004
ILMN_2397954	-0.041474
ILMN_1803348	-0.041468
ILMN_1797375	-0.0414446
ILMN_1658498	-0.0414042
ILMN_1705151	-0.0413854
ILMN_1676213	-0.0413794
ILMN_1665943	-0.0413552
ILMN_1737604	-0.0413446
ILMN_1786834	-0.0413383
ILMN_1739170	-0.0413129
ILMN_1659106	-0.0412724
ILMN_1784083	-0.0412584
ILMN_2376455	-0.041244
ILMN_1732060	-0.0412413
ILMN_1765274	-0.0412243
ILMN_1855746	-0.0412082
ILMN_1773553	-0.0412008
ILMN_1677487	-0.0411764
ILMN_1803810	-0.0411747
ILMN_1699226	-0.0411573
ILMN_1805826	-0.0411548
ILMN_2345872	-0.0411341
ILMN_1694075	-0.0411316
ILMN_1694426	-0.0411243
ILMN_2334296	-0.0411032
ILMN_2377669	-0.0411013
ILMN_1730660	-0.0410814
ILMN_1854349	-0.0410708
ILMN_1713918	-0.0410634
ILMN_2256765	-0.0410594
ILMN_1783156	-0.0410579
ILMN_1655876	-0.0410576
ILMN_1655740	-0.0410418
ILMN_1764769	-0.0410316
ILMN_1688242	-0.041028
ILMN_1769282	-0.0410226
ILMN_1785732	-0.0410208
ILMN_1774761	-0.0410156
ILMN_1802167	-0.0410121
ILMN_1713732	-0.0409971
ILMN_2295518	-0.0409888
ILMN_1802799	-0.0409887
ILMN_1781819	-0.0409843
ILMN_1670379	-0.0409463
ILMN_2259119	-0.0409217
ILMN_2074477	-0.0409139
ILMN_2178226	-0.0409106
ILMN_1705210	-0.0408857
ILMN_1791569	-0.0408749
ILMN_1763442	-0.040873
ILMN_2183692	-0.040865
ILMN_2061950	-0.0408574
ILMN_1785444	-0.0408365
ILMN_1667519	-0.0408351
ILMN_1801303	-0.040831
ILMN_2319326	-0.0408296
ILMN_1712469	-0.0408293
ILMN_1709623	-0.0408006
ILMN_1781001	-0.0407984
ILMN_1663401	-0.0407794
ILMN_1773485	-0.0407763
ILMN_1702787	-0.0407675
ILMN_2201596	-0.0407603
ILMN_1780598	-0.0407292
ILMN_1802653	-0.0407145
ILMN_1813117	-0.0407131
ILMN_1654065	-0.0407129
ILMN_1797704	-0.0406833
ILMN_1668247	-0.0406714
ILMN_1807359	-0.0406588
ILMN_1716687	-0.0406441
ILMN_1765860	-0.0406343
ILMN_1652906	-0.0406158
ILMN_1729117	-0.0406105
ILMN_1681857	-0.0406058
ILMN_2155480	-0.0406007
ILMN_1769550	-0.0405953
ILMN_1651950	-0.0405603
ILMN_1664859	-0.0405566
ILMN_1659075	-0.0405453
ILMN_1815690	-0.0405339
ILMN_1807662	-0.0405334
ILMN_1740604	-0.040521
ILMN_1700147	-0.0405012
ILMN_1677814	-0.0404914
ILMN_1760556	-0.0404573
ILMN_1753789	-0.0404407
ILMN_1770963	-0.0404284
ILMN_1652952	-0.0404052
ILMN_1876470	-0.0403794
ILMN_1689037	-0.040379
ILMN_2188722	-0.040377
ILMN_2278152	-0.0403696
ILMN_2093343	-0.0403551
ILMN_1744968	-0.0403177
ILMN_2215862	-0.0403128
ILMN_1792679	-0.0403082
ILMN_1794598	-0.0402927
ILMN_1710017	-0.0402909
ILMN_1683700	-0.0402873
ILMN_1716797	-0.0402807
ILMN_1680738	-0.0402547
ILMN_1666986	-0.0402409
ILMN_2318725	-0.0402373
ILMN_2059549	-0.0402181
ILMN_1695851	-0.0402159
ILMN_1787567	-0.0402154
ILMN_1741404	-0.0402135
ILMN_1815203	-0.0402127
ILMN_2406304	-0.0402046
ILMN_1727790	-0.040166
ILMN_1800317	-0.0401598
ILMN_1752923	-0.0401577
ILMN_1785272	-0.0401256
ILMN_1779252	-0.0401125
ILMN_1732831	-0.0401118
ILMN_2338038	-0.0401063
ILMN_2334242	-0.040106
ILMN_1770824	-0.0401013
ILMN_1788955	-0.0400996
ILMN_1791678	-0.040089
ILMN_1819784	-0.0400888
ILMN_1797893	-0.0400478
ILMN_1815707	-0.0400261
ILMN_1721495	-0.0400047
ILMN_1704206	-0.0399961
ILMN_1688959	-0.0399866
ILMN_1663916	-0.03998
ILMN_1773650	-0.0399436
ILMN_1674983	-0.0399304
ILMN_1906437	-0.0399293
ILMN_1761812	-0.0399288
ILMN_2358919	-0.0399253
ILMN_1668411	-0.0399033
ILMN_1731358	-0.0398879
ILMN_1796772	-0.0398832
ILMN_1697629	-0.0398818
ILMN_1815035	-0.0398638
ILMN_1680814	-0.0398615
ILMN_1778319	-0.0398533
ILMN_2232854	-0.0398476
ILMN_1725787	-0.0398369
ILMN_2223903	-0.0398361
ILMN_2394250	-0.039826
ILMN_1713529	-0.0398085
ILMN_1738707	-0.0398037
ILMN_2058468	-0.0397961
ILMN_1793729	-0.0397955
ILMN_1685339	-0.0397939
ILMN_1712798	-0.039775
ILMN_1759487	-0.0397625
ILMN_1687035	-0.0397552
ILMN_1696027	-0.0397491
ILMN_2286014	-0.0397361
ILMN_1750181	-0.0397296
ILMN_1796628	-0.0397105
ILMN_1804277	-0.0397067
ILMN_1786893	-0.0397058
ILMN_1716547	-0.0396896
ILMN_1685431	-0.0396776
ILMN_1721344	-0.0396775
ILMN_1696380	-0.0396764
ILMN_1719433	-0.039675
ILMN_1728236	-0.0396582
ILMN_1793616	-0.0396525
ILMN_1682232	-0.0396287
ILMN_1826921	-0.0396162
ILMN_1710427	-0.0396151
ILMN_1732089	-0.0395982
ILMN_2347592	-0.0395964
ILMN_1696852	-0.0395964
ILMN_1700144	-0.0395942
ILMN_1660111	-0.0395693
ILMN_1684836	-0.0395534
ILMN_2410965	-0.039553
ILMN_2340919	-0.0395396
ILMN_1677122	-0.0395272
ILMN_1805175	-0.0395268
ILMN_2134039	-0.039505
ILMN_1662383	-0.0395033
ILMN_1690066	-0.0394933
ILMN_1740586	-0.0394877
ILMN_1732291	-0.0394719
ILMN_1660306	-0.0394691
ILMN_1783182	-0.0394657
ILMN_1651800	-0.0394639
ILMN_1684210	-0.0394527
ILMN_1777998	-0.0394521
ILMN_1768227	-0.0394513
ILMN_2161357	-0.0394232
ILMN_1792409	-0.0394226
ILMN_2151114	-0.0394184
ILMN_2375830	-0.0394103
ILMN_2327795	-0.039406
ILMN_1659952	-0.0393941
ILMN_1741648	-0.0393696
ILMN_1691410	-0.0393553
ILMN_1697491	-0.0393306
ILMN_1727360	-0.0393222
ILMN_1762167	-0.0393142
ILMN_1812091	-0.0393087
ILMN_1909156	-0.0392906
ILMN_1796094	-0.0392692
ILMN_1763688	-0.0392561
ILMN_1717714	-0.0392508
ILMN_2107991	-0.0392476
ILMN_1893633	-0.0392398
ILMN_1798706	-0.0392318
ILMN_1690921	-0.0392153
ILMN_1730117	-0.0392039
ILMN_1671326	-0.0392031
ILMN_1690566	-0.0392005
ILMN_2391264	-0.0391986
ILMN_1658926	-0.039176
ILMN_1727183	-0.039174
ILMN_1729980	-0.0391464
ILMN_1675331	-0.0391408
ILMN_1726986	-0.0391381
ILMN_1794490	-0.0391357
ILMN_1661708	-0.0391355
ILMN_2049184	-0.0391331
ILMN_1675677	-0.0391258
ILMN_2168217	-0.0391209
ILMN_1773901	-0.0391138
ILMN_1734543	-0.0390973
ILMN_1728898	-0.039085
ILMN_1804419	-0.0390832
ILMN_2363634	-0.0390782
ILMN_2339796	-0.0390685
ILMN_1741159	-0.0390237
ILMN_1652825	-0.0390174
ILMN_1807919	-0.0389949
ILMN_1749403	-0.0389911
ILMN_1683148	-0.0389701
ILMN_2096719	-0.038958
ILMN_2091123	-0.0389374
ILMN_1661466	-0.0389292
ILMN_1761242	-0.0389084
ILMN_1651832	-0.0389035
ILMN_2373099	-0.0388979
ILMN_2154287	-0.0388301
ILMN_2276758	-0.0388271
ILMN_1797372	-0.038825
ILMN_1668055	-0.0388161
ILMN_1730906	-0.0388138
ILMN_1732782	-0.0388098
ILMN_1703650	-0.0387858
ILMN_2360730	-0.03878
ILMN_2360710	-0.0387599
ILMN_1732538	-0.0387597
ILMN_1665696	-0.0387565
ILMN_1735367	-0.0387374
ILMN_2384770	-0.0387116
ILMN_2264011	-0.0386901
ILMN_1758816	-0.038689
ILMN_1758214	-0.038684
ILMN_1678087	-0.0386811
ILMN_1794470	-0.0386781
ILMN_1773148	-0.0386751
ILMN_1739876	-0.0386711
ILMN_2368318	-0.0386698
ILMN_1676924	-0.0386667
ILMN_1669599	-0.0386578
ILMN_1701017	-0.0386517
ILMN_1707339	-0.0386106
ILMN_2375003	-0.0385714
ILMN_1666594	-0.0385702
ILMN_1764320	-0.0385628
ILMN_1722089	-0.0385612
ILMN_1774427	-0.0385556
ILMN_2108709	-0.0385514
ILMN_1721022	-0.0385508
ILMN_2368068	-0.0385393
ILMN_1715069	-0.0385267
ILMN_1717163	-0.0385133
ILMN_1676893	-0.0385058
ILMN_2087303	-0.0385048
ILMN_1690209	-0.0384914
ILMN_2385178	-0.0384806
ILMN_1710482	-0.038473
ILMN_2402600	-0.0384603
ILMN_2354381	-0.0384482
ILMN_1739586	-0.0384464
ILMN_1798256	-0.0384146
ILMN_1683178	-0.0384077
ILMN_2351269	-0.0384008
ILMN_1751708	-0.0383936
ILMN_1751630	-0.0383877
ILMN_2415179	-0.0383849
ILMN_1781636	-0.0383591
ILMN_1671661	-0.0383477
ILMN_1657409	-0.0383423
ILMN_2110751	-0.0383387
ILMN_2368530	-0.0383301
ILMN_1691930	-0.0383283
ILMN_1715175	-0.0383254
ILMN_1740385	-0.0383077
ILMN_1661646	-0.0382883
ILMN_1660554	-0.0382854
[truncated: 46,804 more rows]

## Sheet: CM1.Her2-enriched
Probe_ID	CM1 score		Graphs																	Top CM1 score, negative	Probe_ID	Top CM1 score, positive
ILMN_1678535	-0.359546																			-0.359546	ILMN_1678535
ILMN_1728787	-0.314101																			-0.314101	ILMN_1728787
ILMN_1785570	-0.308281																			-0.308281	ILMN_1785570
ILMN_1788874	-0.258654																			-0.258654	ILMN_1788874
ILMN_1688071	-0.256282																			-0.256282	ILMN_1688071
ILMN_2246956	-0.253178																			-0.253178	ILMN_2246956
ILMN_1750394	-0.25094																			-0.25094	ILMN_1750394
ILMN_2143566	-0.245073																			-0.245073	ILMN_2143566
ILMN_1745501	-0.244526																			-0.244526	ILMN_1745501
ILMN_1898518	-0.244432																			-0.244432	ILMN_1898518
ILMN_1801119	-0.241818																			-0.241818	ILMN_1801119
ILMN_2334359	-0.237308																			-0.237308	ILMN_2334359
ILMN_1730612	-0.229651																			-0.229651	ILMN_1730612
ILMN_1746359	-0.228577																			-0.228577	ILMN_1746359
ILMN_1691884	-0.225268																			-0.225268	ILMN_1691884
ILMN_1844029	-0.225082																			-0.225082	ILMN_1844029
ILMN_1849013	-0.216121																			-0.216121	ILMN_1849013
ILMN_1888359	-0.214103																			-0.214103	ILMN_1888359
ILMN_1784783	-0.213135																			-0.213135	ILMN_1784783
ILMN_1722489	-0.211337																			-0.211337	ILMN_1722489
ILMN_1759910	-0.210503																			-0.210503	ILMN_1759910
ILMN_1779416	-0.205832																			-0.205832	ILMN_1779416
ILMN_1725678	-0.205225																			-0.205225	ILMN_1725678
ILMN_1654385	-0.204382																			-0.204382	ILMN_1654385
ILMN_1785711	-0.202511																			-0.202511	ILMN_1785711
ILMN_2406656	-0.202086																				ILMN_1748751	0.229269
ILMN_1772686	-0.199773																				ILMN_1781360	0.229853
ILMN_2283597	-0.198631																				ILMN_2405254	0.232818
ILMN_1775235	-0.197733																				ILMN_2347949	0.233796
ILMN_2311020	-0.196355																				ILMN_1758404	0.236221
ILMN_1803073	-0.195686																				ILMN_1653358	0.237357
ILMN_1835913	-0.195547																				ILMN_1713952	0.237495
ILMN_2310814	-0.191252																				ILMN_2352131	0.239395
ILMN_2269256	-0.187612																				ILMN_1750974	0.241142
ILMN_1703891	-0.185195																				ILMN_1737514	0.242267
ILMN_2217601	-0.183105																				ILMN_1749118	0.243893
ILMN_2387952	-0.180611																				ILMN_1770678	0.246558
ILMN_1791095	-0.179406																				ILMN_1746517	0.246716
ILMN_1709132	-0.178684																				ILMN_2368188	0.24754
ILMN_1698885	-0.176759																				ILMN_1740762	0.24977
ILMN_1708341	-0.174926																				ILMN_1869390	0.251892
ILMN_1720998	-0.174034																				ILMN_1661466	0.253598
ILMN_1655117	-0.172243																				ILMN_1728898	0.256849
ILMN_1801313	-0.17129																				ILMN_1729801	0.282127
ILMN_2050246	-0.170202																				ILMN_2410713	0.284081
ILMN_1826165	-0.167793																				ILMN_1773459	0.293263
ILMN_1785170	-0.166782																				ILMN_1674533	0.300316
ILMN_1716925	-0.165688																				ILMN_1803236	0.316077
ILMN_1764082	-0.165081																				ILMN_1810978	0.325769
ILMN_1711208	-0.164397																				ILMN_2161820	0.332681
ILMN_2363621	-0.163955
ILMN_1730622	-0.163171
ILMN_1699665	-0.163163
ILMN_1678086	-0.161752
ILMN_2281786	-0.161476
ILMN_1746948	-0.161118
ILMN_1718046	-0.160839
ILMN_1687235	-0.159404
ILMN_1743055	-0.159053
ILMN_1811014	-0.159049
ILMN_1755721	-0.158961
ILMN_2088437	-0.158734
ILMN_2203588	-0.158592
ILMN_2066088	-0.158106
ILMN_1731237	-0.157271
ILMN_1744023	-0.156087
ILMN_2120555	-0.155899
ILMN_1798108	-0.155708
ILMN_2216637	-0.155266
ILMN_1726743	-0.154721
ILMN_1669114	-0.153238
ILMN_1790350	-0.151812
ILMN_2358760	-0.15153
ILMN_1801658	-0.150849
ILMN_1794595	-0.150668
ILMN_1781400	-0.150109
ILMN_1814327	-0.150011
ILMN_1654287	-0.149626
ILMN_1759232	-0.148926
ILMN_1723709	-0.148918
ILMN_2098446	-0.147984
ILMN_2404256	-0.14793
ILMN_2191192	-0.147597
ILMN_1679632	-0.146818
ILMN_2382942	-0.146741
ILMN_1717477	-0.146673
ILMN_1737360	-0.146305
ILMN_1795839	-0.14604
ILMN_1788192	-0.145505
ILMN_1700518	-0.145445
ILMN_1756469	-0.14519
ILMN_2153485	-0.145033
ILMN_2341343	-0.1449
ILMN_1704065	-0.144832
ILMN_1659312	-0.143997
ILMN_1770085	-0.143656
ILMN_1701918	-0.143297
ILMN_1738989	-0.142902
ILMN_1728380	-0.142249
ILMN_1710903	-0.142061
ILMN_1684571	-0.141021
ILMN_1708402	-0.140558
ILMN_1809639	-0.140388
ILMN_1719599	-0.139995
ILMN_1795285	-0.139607
ILMN_2077952	-0.139095
ILMN_1664922	-0.13904
ILMN_2329569	-0.137344
ILMN_1740842	-0.137189
ILMN_2183692	-0.13718
ILMN_2405470	-0.137063
ILMN_2119123	-0.136642
ILMN_1711894	-0.13646
ILMN_1811330	-0.136251
ILMN_1746801	-0.136237
ILMN_1800354	-0.135942
ILMN_1784287	-0.135201
ILMN_1862217	-0.134497
ILMN_2212999	-0.133256
ILMN_1907649	-0.133149
ILMN_2302757	-0.132947
ILMN_1721170	-0.132915
ILMN_1685174	-0.132885
ILMN_1765459	-0.132802
ILMN_1719622	-0.1326
ILMN_1725773	-0.132517
ILMN_1651958	-0.132516
ILMN_1722811	-0.132384
ILMN_1693119	-0.132261
ILMN_1794707	-0.131637
ILMN_2408572	-0.131428
ILMN_2205896	-0.130678
ILMN_1755741	-0.130234
ILMN_2398408	-0.129707
ILMN_1700652	-0.129327
ILMN_1709043	-0.128094
ILMN_1755649	-0.127916
ILMN_1800993	-0.127604
ILMN_1769092	-0.127443
ILMN_2316955	-0.127411
ILMN_1747020	-0.127374
ILMN_1729112	-0.127266
ILMN_1741768	-0.127134
ILMN_1665123	-0.127024
ILMN_1723443	-0.127016
ILMN_1774974	-0.126714
ILMN_2179717	-0.126688
ILMN_1696254	-0.126677
ILMN_1768772	-0.12659
ILMN_1720604	-0.126449
ILMN_1716843	-0.126061
ILMN_1652826	-0.125951
ILMN_1669983	-0.125927
ILMN_1706687	-0.12588
ILMN_1774287	-0.125708
ILMN_1739274	-0.125438
ILMN_1772706	-0.125329
ILMN_2319414	-0.125251
ILMN_1682095	-0.124067
ILMN_1756928	-0.124028
ILMN_1797861	-0.12383
ILMN_1676749	-0.12373
ILMN_1684984	-0.123695
ILMN_1805765	-0.123674
ILMN_1662263	-0.123492
ILMN_1815705	-0.12346
ILMN_1763704	-0.123281
ILMN_2234697	-0.123121
ILMN_1800942	-0.122948
ILMN_1814557	-0.122946
ILMN_1750969	-0.122919
ILMN_2152429	-0.122716
ILMN_1795905	-0.122449
ILMN_2146372	-0.122367
ILMN_1692844	-0.122262
ILMN_1657632	-0.121859
ILMN_1701711	-0.121554
ILMN_1797735	-0.12122
ILMN_1724424	-0.121197
ILMN_2289924	-0.121109
ILMN_1667948	-0.120968
ILMN_1727087	-0.120815
ILMN_2355042	-0.120728
ILMN_1732143	-0.120574
ILMN_1667716	-0.120122
ILMN_1724480	-0.120067
ILMN_1695397	-0.119751
ILMN_1684211	-0.119642
ILMN_2125763	-0.119566
ILMN_1739233	-0.119317
ILMN_1654151	-0.119247
ILMN_1776724	-0.119114
ILMN_1691966	-0.11906
ILMN_2245676	-0.119038
ILMN_1696767	-0.118986
ILMN_1716468	-0.118983
ILMN_1659762	-0.11881
ILMN_1736533	-0.118717
ILMN_1755173	-0.118639
ILMN_1753440	-0.118596
ILMN_1728496	-0.118392
ILMN_2146418	-0.118289
ILMN_1700831	-0.118076
ILMN_1805104	-0.11805
ILMN_1749478	-0.117465
ILMN_1699989	-0.11733
ILMN_1677292	-0.117324
ILMN_1748625	-0.117314
ILMN_2151056	-0.117218
ILMN_2105960	-0.117088
ILMN_1655974	-0.117036
ILMN_1812073	-0.116848
ILMN_1767523	-0.116805
ILMN_1742109	-0.116802
ILMN_1688423	-0.116318
ILMN_1670925	-0.116144
ILMN_1688480	-0.116135
ILMN_1794825	-0.116117
ILMN_1740920	-0.11611
ILMN_1772588	-0.115882
ILMN_2406035	-0.115875
ILMN_1779735	-0.115766
ILMN_1738742	-0.115648
ILMN_1799150	-0.115558
ILMN_2071809	-0.115539
ILMN_1727360	-0.115414
ILMN_1672443	-0.115324
ILMN_2097793	-0.115323
ILMN_2087692	-0.115311
ILMN_1694533	-0.115149
ILMN_2354391	-0.115045
ILMN_2407168	-0.114841
ILMN_1651964	-0.11469
ILMN_1680618	-0.114659
ILMN_2311989	-0.114578
ILMN_2398403	-0.114468
ILMN_1813753	-0.114032
ILMN_1715789	-0.113939
ILMN_1691237	-0.113808
ILMN_1740772	-0.113788
ILMN_2397954	-0.113594
ILMN_1707464	-0.113573
ILMN_2372136	-0.113559
ILMN_1657451	-0.113497
ILMN_1713162	-0.113416
ILMN_1660372	-0.113342
ILMN_1676990	-0.112763
ILMN_1665865	-0.112654
ILMN_1672124	-0.112638
ILMN_1787691	-0.112447
ILMN_1659189	-0.112371
ILMN_1806634	-0.112285
ILMN_1791905	-0.112081
ILMN_1716790	-0.112069
ILMN_1667906	-0.112013
ILMN_1669631	-0.111879
ILMN_1864166	-0.111799
ILMN_1782069	-0.111748
ILMN_1677384	-0.111674
ILMN_1690487	-0.111471
ILMN_1665192	-0.111443
ILMN_1716465	-0.111424
ILMN_1663416	-0.111261
ILMN_2058795	-0.111254
ILMN_2122420	-0.110581
ILMN_2383097	-0.110406
ILMN_1808584	-0.110218
ILMN_2179726	-0.109998
ILMN_1691567	-0.109833
ILMN_1658283	-0.109535
ILMN_1795582	-0.109419
ILMN_2375484	-0.109234
ILMN_1803691	-0.1092
ILMN_1741477	-0.108733
ILMN_2405602	-0.108678
ILMN_1712305	-0.108639
ILMN_1690807	-0.108526
ILMN_2081883	-0.108523
ILMN_1759772	-0.108321
ILMN_1777221	-0.108265
ILMN_1753265	-0.108255
ILMN_1790315	-0.108251
ILMN_1803593	-0.108248
ILMN_1654609	-0.108152
ILMN_2401641	-0.108056
ILMN_2349600	-0.108024
ILMN_2129563	-0.107967
ILMN_1736939	-0.10787
ILMN_1672389	-0.107797
ILMN_2366972	-0.107777
ILMN_1708983	-0.107686
ILMN_1714599	-0.107553
ILMN_1786789	-0.107489
ILMN_2413323	-0.107479
ILMN_1660727	-0.107377
ILMN_1736670	-0.107172
ILMN_1796682	-0.107166
ILMN_1776602	-0.107161
ILMN_1732343	-0.107124
ILMN_1689456	-0.1071
ILMN_1730816	-0.107018
ILMN_2353862	-0.107015
ILMN_1656934	-0.106913
ILMN_1777342	-0.106893
ILMN_1655796	-0.106887
ILMN_1806456	-0.106842
ILMN_1725528	-0.106488
ILMN_1907042	-0.106463
ILMN_1836469	-0.106404
ILMN_1712577	-0.106043
ILMN_1714349	-0.105842
ILMN_1728742	-0.105831
ILMN_1701052	-0.105615
ILMN_1655469	-0.105508
ILMN_1789338	-0.105478
ILMN_1815346	-0.105306
ILMN_1725417	-0.105298
ILMN_1772605	-0.105123
ILMN_1720285	-0.104983
ILMN_1696657	-0.104694
ILMN_1735743	-0.104691
ILMN_1699644	-0.104553
ILMN_1797530	-0.104501
ILMN_1713491	-0.104489
ILMN_2341487	-0.104438
ILMN_1789879	-0.10435
ILMN_1658759	-0.104318
ILMN_1707137	-0.104181
ILMN_1767642	-0.104143
ILMN_1652371	-0.104128
ILMN_1752639	-0.104122
ILMN_1689774	-0.10406
ILMN_1791328	-0.104001
ILMN_2330341	-0.103931
ILMN_1751016	-0.103863
ILMN_1798164	-0.103854
ILMN_1669484	-0.103637
ILMN_1696243	-0.103458
ILMN_1757074	-0.103427
ILMN_1726352	-0.103297
ILMN_1745946	-0.103199
ILMN_2294978	-0.103186
ILMN_1655498	-0.103161
ILMN_1789112	-0.103042
ILMN_1762561	-0.103041
ILMN_1713803	-0.103035
ILMN_1696974	-0.103028
ILMN_2202940	-0.103009
ILMN_2083469	-0.102878
ILMN_1720513	-0.102849
ILMN_1734190	-0.102725
ILMN_1799487	-0.102637
ILMN_1743714	-0.102627
ILMN_1730347	-0.10251
ILMN_1878029	-0.102468
ILMN_1658351	-0.102467
ILMN_1684352	-0.102423
ILMN_1768534	-0.102263
ILMN_1742025	-0.102002
ILMN_2042595	-0.101833
ILMN_1659082	-0.101715
ILMN_2366703	-0.101664
ILMN_2406815	-0.101588
ILMN_1656801	-0.101498
ILMN_1800220	-0.101446
ILMN_1682567	-0.101274
ILMN_1757338	-0.100936
ILMN_1777199	-0.100872
ILMN_1683959	-0.100766
ILMN_2103295	-0.100677
ILMN_1718771	-0.100607
ILMN_1760574	-0.100455
ILMN_1671392	-0.100415
ILMN_1764207	-0.100385
ILMN_1811836	-0.100367
ILMN_1791147	-0.100279
ILMN_1795976	-0.100226
ILMN_1900110	-0.100197
ILMN_2320513	-0.100118
ILMN_2338997	-0.0999964
ILMN_1668582	-0.0998582
ILMN_2217935	-0.099777
ILMN_1804737	-0.0996426
ILMN_1683635	-0.0995541
ILMN_1686841	-0.0993322
ILMN_1751400	-0.0993318
ILMN_1792972	-0.0992314
ILMN_2183409	-0.0992035
ILMN_1788347	-0.0991078
ILMN_1707156	-0.0990763
ILMN_2147306	-0.0990604
ILMN_1652602	-0.0989866
ILMN_1677439	-0.0988152
ILMN_1745021	-0.0987827
ILMN_1674782	-0.0987584
ILMN_2180371	-0.0986676
ILMN_1687351	-0.0985288
ILMN_2225735	-0.0984803
ILMN_1669523	-0.0984782
ILMN_1799604	-0.0983982
ILMN_1811363	-0.0983942
ILMN_2185563	-0.0983106
ILMN_1685124	-0.098305
ILMN_1674032	-0.0982165
ILMN_1736527	-0.0981626
ILMN_1733627	-0.0981571
ILMN_1769219	-0.0981496
ILMN_1655422	-0.0980982
ILMN_1736054	-0.0980318
ILMN_1713668	-0.0980242
ILMN_2119692	-0.0979964
ILMN_1811648	-0.0979962
ILMN_1845086	-0.0979387
ILMN_1747655	-0.0979246
ILMN_2344650	-0.0978915
ILMN_2264681	-0.0978727
ILMN_1815086	-0.0978417
ILMN_2342437	-0.0977608
ILMN_1748529	-0.0977548
ILMN_1663171	-0.097728
ILMN_1750596	-0.0975868
ILMN_1711766	-0.0975319
ILMN_1673941	-0.0973456
ILMN_1783231	-0.0972999
ILMN_1664466	-0.0972929
ILMN_2191568	-0.0972538
ILMN_2294976	-0.0972163
ILMN_1782743	-0.0971698
ILMN_1786242	-0.097081
ILMN_1674522	-0.097022
ILMN_2156936	-0.0969798
ILMN_1768773	-0.0968954
ILMN_1679796	-0.0967719
ILMN_2196347	-0.0967043
ILMN_1901921	-0.0967
ILMN_1694535	-0.0966651
ILMN_1702835	-0.0966332
ILMN_1784753	-0.0966081
ILMN_1708482	-0.0966032
ILMN_2231911	-0.096546
ILMN_2332267	-0.0965454
ILMN_1801703	-0.0964426
ILMN_1783709	-0.0964374
ILMN_1804955	-0.0964162
ILMN_1662852	-0.0963752
ILMN_1749641	-0.0963748
ILMN_2360307	-0.0962948
ILMN_1750507	-0.0962918
ILMN_1808354	-0.0962331
ILMN_1702265	-0.0961983
ILMN_1764168	-0.0961374
ILMN_1703041	-0.0961169
ILMN_1658206	-0.0960192
ILMN_1683533	-0.0960081
ILMN_1688892	-0.0958886
ILMN_1793615	-0.095798
ILMN_1773063	-0.0957941
ILMN_1694259	-0.0957163
ILMN_1736242	-0.0955537
ILMN_1691611	-0.0955024
ILMN_1708303	-0.0953757
ILMN_1746378	-0.095194
ILMN_1794803	-0.0951864
ILMN_1773307	-0.0950848
ILMN_1749821	-0.0949988
ILMN_2375360	-0.0948627
ILMN_2184525	-0.0947682
ILMN_1788149	-0.0947432
ILMN_1713450	-0.0947312
ILMN_1655444	-0.0946056
ILMN_1726199	-0.094561
ILMN_2354547	-0.0945351
ILMN_1713031	-0.0944471
ILMN_1692340	-0.0944073
ILMN_2405797	-0.0942971
ILMN_1805228	-0.0940621
ILMN_1760727	-0.0940305
ILMN_1699362	-0.0938751
ILMN_2186678	-0.0938709
ILMN_1813695	-0.0938162
ILMN_1762747	-0.0937189
ILMN_1696701	-0.0936962
ILMN_2110908	-0.093629
ILMN_1661778	-0.0936269
ILMN_1736828	-0.0934912
ILMN_1792456	-0.0933179
ILMN_1675239	-0.0932571
ILMN_2309180	-0.0929739
ILMN_1764754	-0.0929336
ILMN_2230566	-0.0928449
ILMN_1808379	-0.0927966
ILMN_1789400	-0.0927775
ILMN_1810289	-0.0925416
ILMN_1803219	-0.092446
ILMN_1746704	-0.0924044
ILMN_2097858	-0.0924032
ILMN_1831106	-0.0922795
ILMN_2406468	-0.0921572
ILMN_1801822	-0.092111
ILMN_1768004	-0.0920168
ILMN_1747146	-0.0919658
ILMN_1800590	-0.0919626
ILMN_1769299	-0.0919277
ILMN_1681972	-0.0919023
ILMN_1705737	-0.0918291
ILMN_2215639	-0.0917859
ILMN_1719641	-0.0917709
ILMN_1668247	-0.0917592
ILMN_2094166	-0.0917079
ILMN_1802557	-0.0917006
ILMN_1770548	-0.0916515
ILMN_1653896	-0.0916235
ILMN_1691131	-0.0915824
ILMN_1792689	-0.0915637
ILMN_1794213	-0.0915599
ILMN_1748323	-0.0915158
ILMN_1778347	-0.0914942
ILMN_2168520	-0.0914827
ILMN_1653501	-0.0913986
ILMN_1719835	-0.0913732
ILMN_2079386	-0.0913512
ILMN_1684554	-0.0913357
ILMN_1675048	-0.0911757
ILMN_2394498	-0.0909466
ILMN_1753766	-0.0908487
ILMN_2354478	-0.0908279
ILMN_1669818	-0.0908116
ILMN_1752968	-0.0907828
ILMN_1757877	-0.0907752
ILMN_1766981	-0.0907379
ILMN_1797576	-0.0906845
ILMN_1715607	-0.0906817
ILMN_1689868	-0.0906713
ILMN_1729962	-0.0905849
ILMN_1742073	-0.0904658
ILMN_1776188	-0.0904005
ILMN_1706413	-0.0903955
ILMN_1730824	-0.0903724
ILMN_1722781	-0.0903487
ILMN_1695917	-0.090308
ILMN_1657864	-0.0902777
ILMN_1701753	-0.0902656
ILMN_1716583	-0.0902397
ILMN_1766425	-0.0901489
ILMN_1797660	-0.0900785
ILMN_1792587	-0.0900019
ILMN_1683065	-0.0899536
ILMN_1709237	-0.089832
ILMN_1700563	-0.0898269
ILMN_2081988	-0.0897996
ILMN_1657087	-0.0897848
ILMN_1810577	-0.0897798
ILMN_1761941	-0.0897138
ILMN_1788135	-0.0896396
ILMN_1758523	-0.0896333
ILMN_1749447	-0.0896293
ILMN_1706531	-0.0895887
ILMN_1781761	-0.0894604
ILMN_1713529	-0.089443
ILMN_1736078	-0.0894193
ILMN_1681780	-0.089265
ILMN_2395974	-0.0892101
ILMN_1657361	-0.0891702
ILMN_1740493	-0.089152
ILMN_1699440	-0.0891304
ILMN_1760982	-0.0889867
ILMN_1665876	-0.0889283
ILMN_1724497	-0.0888931
ILMN_1681890	-0.0887306
ILMN_1731546	-0.0886935
ILMN_1652456	-0.0886533
ILMN_1655663	-0.0886223
ILMN_1724495	-0.0885818
ILMN_1702637	-0.0884503
ILMN_1700257	-0.0884214
ILMN_1683576	-0.0882834
ILMN_2370464	-0.0882537
ILMN_2165354	-0.088249
ILMN_2218208	-0.0882431
ILMN_1800935	-0.0881648
ILMN_1655011	-0.0881382
ILMN_2274923	-0.0881047
ILMN_2200636	-0.0880959
ILMN_1814151	-0.0880157
ILMN_1675677	-0.0879841
ILMN_1703697	-0.0879795
ILMN_2067852	-0.0878898
ILMN_1733875	-0.0878219
ILMN_2055165	-0.0877878
ILMN_2359345	-0.0877766
ILMN_1732127	-0.0876819
ILMN_1661078	-0.0876664
ILMN_2400322	-0.0876542
ILMN_2379375	-0.0875989
ILMN_1712390	-0.0875386
ILMN_1706990	-0.087531
ILMN_1741219	-0.0874839
ILMN_1699728	-0.0874789
ILMN_1808765	-0.0874135
ILMN_1720531	-0.087261
ILMN_1710220	-0.0872495
ILMN_1690170	-0.0872474
ILMN_1698512	-0.0870875
ILMN_1652024	-0.087057
ILMN_1702247	-0.0870543
ILMN_1763852	-0.0870277
ILMN_1708131	-0.0870195
ILMN_1693762	-0.0869889
ILMN_1668619	-0.0868427
ILMN_2307450	-0.0868402
ILMN_1813955	-0.086779
ILMN_1720093	-0.0867519
ILMN_1674024	-0.0867348
ILMN_1874575	-0.0867332
ILMN_1797893	-0.0867019
ILMN_1767337	-0.0865952
ILMN_1796240	-0.0865576
ILMN_1812477	-0.0865118
ILMN_1751607	-0.0864951
ILMN_1736704	-0.0864896
ILMN_1700695	-0.0864284
ILMN_1686562	-0.0864086
ILMN_2365223	-0.0863622
ILMN_1852022	-0.0863154
ILMN_1803211	-0.0863125
ILMN_1683700	-0.0863017
ILMN_1772459	-0.0861617
ILMN_1739374	-0.0861599
ILMN_1783690	-0.0861593
ILMN_1698508	-0.086126
ILMN_1747067	-0.0861201
ILMN_1677385	-0.0860971
ILMN_1785646	-0.0860182
ILMN_2217630	-0.0860181
ILMN_2339705	-0.0860168
ILMN_1656369	-0.0859278
ILMN_1809971	-0.0858946
ILMN_2341690	-0.0858892
ILMN_2188966	-0.0858623
ILMN_2267535	-0.0858252
ILMN_1695110	-0.0857811
ILMN_1726928	-0.0857533
ILMN_2064898	-0.0857414
ILMN_2325506	-0.0856083
ILMN_2345142	-0.0855558
ILMN_1675191	-0.0855207
ILMN_1765644	-0.0854596
ILMN_2335604	-0.0854252
ILMN_1790549	-0.0853715
ILMN_2154052	-0.0853546
ILMN_2386530	-0.0853278
ILMN_1748983	-0.0852915
ILMN_2099586	-0.0852673
ILMN_2411076	-0.0851801
ILMN_1782688	-0.0851222
ILMN_1742881	-0.085093
ILMN_1695946	-0.0848894
ILMN_1749846	-0.0848892
ILMN_1728230	-0.0848245
ILMN_1697962	-0.0847916
ILMN_1677200	-0.084783
ILMN_1750511	-0.0847374
ILMN_1787718	-0.0847235
ILMN_1807211	-0.0847142
ILMN_1793598	-0.084702
ILMN_1810486	-0.0846774
ILMN_1815718	-0.0846505
ILMN_2377496	-0.0845981
ILMN_1795251	-0.0844275
ILMN_1742250	-0.0844268
ILMN_1775965	-0.0844242
ILMN_2225144	-0.0843988
ILMN_1754145	-0.0843837
ILMN_1746403	-0.0843249
ILMN_2134555	-0.0843083
ILMN_1743219	-0.0843058
ILMN_1748241	-0.0842958
ILMN_1739683	-0.0842419
ILMN_1771732	-0.0842264
ILMN_2094905	-0.0842039
ILMN_1687092	-0.0841886
ILMN_1805177	-0.0841807
ILMN_2406299	-0.0841201
ILMN_2357730	-0.0840607
ILMN_2038772	-0.0840136
ILMN_1708328	-0.083978
ILMN_1767129	-0.0838772
ILMN_1741782	-0.0838577
ILMN_1677483	-0.0837771
ILMN_2197128	-0.083755
ILMN_1784709	-0.0837477
ILMN_1814333	-0.0837277
ILMN_1661895	-0.0836799
ILMN_1782247	-0.0836705
ILMN_2174369	-0.0835831
ILMN_2209180	-0.0835364
ILMN_2201580	-0.0834058
ILMN_1661799	-0.083403
ILMN_2376859	-0.0833809
ILMN_1769319	-0.0833513
ILMN_1651364	-0.0833331
ILMN_1661346	-0.0833298
ILMN_1741200	-0.0833001
ILMN_1809292	-0.0831835
ILMN_1803094	-0.0831744
ILMN_1665035	-0.0831301
ILMN_2395969	-0.0831282
ILMN_1651680	-0.0830839
ILMN_1752741	-0.0830288
ILMN_2054607	-0.0830215
ILMN_1808059	-0.0829976
ILMN_1707342	-0.0829883
ILMN_1656940	-0.0829432
ILMN_2158336	-0.0827989
ILMN_1742534	-0.0827738
ILMN_1796146	-0.0827518
ILMN_1681008	-0.0827503
ILMN_2401927	-0.0826591
ILMN_2405324	-0.0826507
ILMN_1769277	-0.0826237
ILMN_1780444	-0.0826156
ILMN_1777344	-0.0825999
ILMN_2128795	-0.0824145
ILMN_1807994	-0.0824113
ILMN_1684054	-0.082402
ILMN_2116127	-0.0823928
ILMN_2370976	-0.0823819
ILMN_1863962	-0.0823714
ILMN_1691575	-0.0823469
ILMN_1714536	-0.0823236
ILMN_2277676	-0.0822834
ILMN_1698766	-0.0822283
ILMN_1654541	-0.0821647
ILMN_2301624	-0.0821557
ILMN_1684690	-0.0821175
ILMN_1712035	-0.0820887
ILMN_1689525	-0.0820457
ILMN_1673380	-0.0820176
ILMN_1689552	-0.0820043
ILMN_1781388	-0.081807
ILMN_1866954	-0.0818051
ILMN_1764871	-0.081769
ILMN_1712678	-0.0817421
ILMN_1657547	-0.0817357
ILMN_1684034	-0.0817354
ILMN_1772786	-0.0817299
ILMN_1805007	-0.081722
ILMN_2232157	-0.0816078
ILMN_1762712	-0.0816055
ILMN_1651705	-0.081598
ILMN_1718907	-0.0815977
ILMN_1810915	-0.0815278
ILMN_2391750	-0.0815005
ILMN_1702858	-0.0814918
ILMN_2311873	-0.0814447
ILMN_1746819	-0.0813528
ILMN_1721968	-0.0813338
ILMN_1748427	-0.0813045
ILMN_1727001	-0.081265
ILMN_1773200	-0.0812598
ILMN_1779014	-0.0811724
ILMN_1784985	-0.0811649
ILMN_1776993	-0.0810946
ILMN_1695034	-0.0810493
ILMN_1706764	-0.0809931
ILMN_1728581	-0.08094
ILMN_1744059	-0.0809323
ILMN_1683595	-0.080892
ILMN_1745788	-0.0808722
ILMN_1726460	-0.0808617
ILMN_1762899	-0.0808501
ILMN_1660864	-0.0808349
ILMN_1704196	-0.0808233
ILMN_2411282	-0.0808147
ILMN_2180677	-0.080754
ILMN_1807525	-0.0807498
ILMN_1725014	-0.0807398
ILMN_1676893	-0.0807143
ILMN_1777318	-0.080696
ILMN_1678546	-0.0806244
ILMN_2076940	-0.0805734
ILMN_1729175	-0.0805686
ILMN_1789505	-0.0805119
ILMN_1780141	-0.0804639
ILMN_1700231	-0.0804606
ILMN_1697561	-0.0804395
ILMN_2378100	-0.0802732
ILMN_1713561	-0.0802596
ILMN_1779600	-0.0802581
ILMN_1713449	-0.0802499
ILMN_1715647	-0.0802497
ILMN_2164081	-0.0802247
ILMN_1760256	-0.080111
ILMN_1792415	-0.0800593
ILMN_1727134	-0.0800496
ILMN_1811181	-0.0800151
ILMN_1746604	-0.0800079
ILMN_2150352	-0.0799719
ILMN_1803312	-0.0799261
ILMN_1791097	-0.0799095
ILMN_1783120	-0.0798889
ILMN_1762990	-0.0798871
ILMN_2325574	-0.0798811
ILMN_1812312	-0.0798624
ILMN_1745389	-0.0798417
ILMN_2095273	-0.0798209
ILMN_2174437	-0.0797833
ILMN_1814643	-0.0797704
ILMN_1744068	-0.0797577
ILMN_1808500	-0.0797278
ILMN_1735827	-0.0797162
ILMN_1720745	-0.079698
ILMN_2410772	-0.0796738
ILMN_1813091	-0.0796499
ILMN_1804328	-0.079647
ILMN_1693702	-0.079629
ILMN_1788019	-0.079537
ILMN_1703565	-0.0795248
ILMN_2354515	-0.0794899
ILMN_1738759	-0.079473
ILMN_1674661	-0.0794346
ILMN_1684210	-0.0793887
ILMN_1792508	-0.0793663
ILMN_1673478	-0.0793594
ILMN_1735038	-0.0793348
ILMN_1697317	-0.0793263
ILMN_1843949	-0.0793177
ILMN_1782954	-0.0791441
ILMN_1771233	-0.0790993
ILMN_1777449	-0.0790793
ILMN_1728799	-0.0790447
ILMN_2408987	-0.0790302
ILMN_1798659	-0.0790179
ILMN_2399174	-0.0789911
ILMN_2404539	-0.0789899
ILMN_2153837	-0.0789851
ILMN_1740234	-0.0789113
ILMN_1677968	-0.0789038
ILMN_1745154	-0.078883
ILMN_1667460	-0.0788075
ILMN_1717793	-0.0787968
ILMN_1709257	-0.0787842
ILMN_1695093	-0.0787585
ILMN_1674551	-0.078685
ILMN_1700515	-0.0786561
ILMN_1859946	-0.0786066
ILMN_1716246	-0.0785856
ILMN_2056975	-0.0785606
ILMN_2100815	-0.0785172
ILMN_1726359	-0.078457
ILMN_1771962	-0.0783763
ILMN_2288784	-0.0783732
ILMN_2285404	-0.0783359
ILMN_2400219	-0.0783057
ILMN_1774949	-0.0782709
ILMN_2214355	-0.0782681
ILMN_1775944	-0.0782179
ILMN_1665686	-0.0781161
ILMN_1729033	-0.0780327
ILMN_1799015	-0.0779891
ILMN_1744822	-0.0779549
ILMN_2374687	-0.0779379
ILMN_1656807	-0.077937
ILMN_1716797	-0.0779315
ILMN_1678781	-0.0779199
ILMN_2051867	-0.0779127
ILMN_2075847	-0.0778169
ILMN_1663519	-0.0778117
ILMN_1777765	-0.0778023
ILMN_1658053	-0.0777727
ILMN_2132809	-0.0777215
ILMN_1690386	-0.0777079
ILMN_1778161	-0.0776996
ILMN_1784110	-0.0776442
ILMN_1732074	-0.0776425
ILMN_1847334	-0.0774934
ILMN_1805996	-0.0774632
ILMN_1794612	-0.0774632
ILMN_2339266	-0.077434
ILMN_1762103	-0.0774265
ILMN_1745217	-0.0774186
ILMN_1785926	-0.0773821
ILMN_1733311	-0.0773365
ILMN_1654946	-0.0773206
ILMN_1665280	-0.0773039
ILMN_1719224	-0.0772917
ILMN_1813851	-0.0772791
ILMN_2327346	-0.077276
ILMN_1725312	-0.0772697
ILMN_1703110	-0.0772625
ILMN_2351795	-0.0772393
ILMN_2043809	-0.0772267
ILMN_2392189	-0.0772218
ILMN_1715324	-0.0771981
ILMN_1724668	-0.0771447
ILMN_1689712	-0.077137
ILMN_1732404	-0.0771263
ILMN_1795666	-0.0771253
ILMN_1713369	-0.0770985
ILMN_1778319	-0.0770951
ILMN_1651429	-0.0770859
ILMN_1784880	-0.0770713
ILMN_1803846	-0.0770389
ILMN_1674193	-0.0769299
ILMN_1776076	-0.0769295
ILMN_1699525	-0.0768767
ILMN_1681252	-0.0767152
ILMN_1681845	-0.0766549
ILMN_1806312	-0.0766412
ILMN_1742260	-0.0766149
ILMN_1724666	-0.0765942
ILMN_2410864	-0.0765875
ILMN_1672405	-0.0765479
ILMN_1793371	-0.0764747
ILMN_1777644	-0.076369
ILMN_1744574	-0.0762867
ILMN_2200659	-0.0762562
ILMN_2367165	-0.0762516
ILMN_1677043	-0.0762016
ILMN_2094313	-0.0760539
ILMN_1657857	-0.0760431
ILMN_2349444	-0.076024
ILMN_2127328	-0.0759913
ILMN_1744980	-0.0759705
ILMN_1691458	-0.0758788
ILMN_1680193	-0.0758459
ILMN_1720511	-0.0758408
ILMN_1694491	-0.0757917
ILMN_2186482	-0.0757903
ILMN_1687037	-0.0757713
ILMN_2376416	-0.0757528
ILMN_2343310	-0.0757388
ILMN_1793543	-0.0757237
ILMN_1761566	-0.075686
ILMN_1814622	-0.0756689
ILMN_1698478	-0.0756477
ILMN_1663640	-0.075639
ILMN_1701006	-0.0756037
ILMN_1749792	-0.0755955
ILMN_1685369	-0.0755758
ILMN_1727142	-0.0755481
ILMN_2197225	-0.0755259
ILMN_1768110	-0.0754969
ILMN_1665164	-0.0754753
ILMN_1674135	-0.0753391
ILMN_1658289	-0.07533
ILMN_2383489	-0.0753126
ILMN_1788053	-0.0753041
ILMN_2228732	-0.0752865
ILMN_1759252	-0.075265
ILMN_2321634	-0.0752565
ILMN_1713290	-0.0752198
ILMN_1664292	-0.075204
ILMN_1766499	-0.075136
ILMN_1679071	-0.0751153
ILMN_1795639	-0.0750765
ILMN_1723729	-0.0750589
ILMN_1781416	-0.0750348
ILMN_1660602	-0.0750016
ILMN_1723414	-0.074985
ILMN_1903159	-0.0749549
ILMN_2100689	-0.0749176
ILMN_1736965	-0.0749033
ILMN_1789567	-0.0748354
ILMN_1654583	-0.0747946
ILMN_1743345	-0.0747932
ILMN_1701173	-0.0747038
ILMN_1707649	-0.0746995
ILMN_1797172	-0.074692
ILMN_1740609	-0.0746528
ILMN_1670926	-0.0746384
ILMN_1809577	-0.0745865
ILMN_1660927	-0.0745781
ILMN_1668125	-0.0745471
ILMN_1658499	-0.0745262
ILMN_1802096	-0.0744559
ILMN_1680251	-0.0743662
ILMN_1723353	-0.0743471
ILMN_1791280	-0.0743057
ILMN_1670079	-0.074295
ILMN_1731941	-0.0742668
ILMN_1790555	-0.0742629
ILMN_2184612	-0.0742207
ILMN_1741869	-0.0742109
ILMN_1746368	-0.0741986
ILMN_1813846	-0.074188
ILMN_1689749	-0.074085
ILMN_1763147	-0.0740774
ILMN_1758642	-0.0739374
ILMN_1812557	-0.073912
ILMN_2412139	-0.0738771
ILMN_1655403	-0.0738474
ILMN_1736481	-0.0737985
ILMN_2090123	-0.0737876
ILMN_1676822	-0.0737798
ILMN_1772731	-0.0737531
ILMN_2413015	-0.0736858
ILMN_2327203	-0.0736187
ILMN_1714067	-0.0736134
ILMN_1755281	-0.0736068
ILMN_1809817	-0.0735153
ILMN_1773312	-0.0735146
ILMN_1754234	-0.0734958
ILMN_1736103	-0.0734815
ILMN_1772876	-0.0734679
ILMN_1766505	-0.0734228
ILMN_1680673	-0.0734123
ILMN_1712985	-0.0733807
ILMN_1788421	-0.0733633
ILMN_1763941	-0.0733589
ILMN_1761804	-0.0733081
ILMN_1755234	-0.0732964
ILMN_1769409	-0.0732962
ILMN_1813256	-0.073284
ILMN_1786278	-0.0732808
ILMN_1684795	-0.0732707
ILMN_1779882	-0.0732657
ILMN_1812191	-0.073229
ILMN_1715931	-0.073168
ILMN_1742069	-0.0731664
ILMN_1768097	-0.07313
ILMN_2365484	-0.0730959
ILMN_1670611	-0.0730632
ILMN_1781996	-0.0730603
ILMN_2335669	-0.073039
ILMN_1715555	-0.0730256
ILMN_1747577	-0.0729899
ILMN_1773006	-0.0729672
ILMN_1669456	-0.0729593
ILMN_1712027	-0.0729242
ILMN_2400922	-0.0729148
ILMN_1751338	-0.0729034
ILMN_1807095	-0.0728821
ILMN_1653750	-0.072865
ILMN_1718984	-0.0728292
ILMN_1695924	-0.0727781
ILMN_1733680	-0.072722
ILMN_1804679	-0.0727078
ILMN_1656537	-0.072682
ILMN_2147345	-0.072634
ILMN_1805395	-0.0725638
ILMN_1697503	-0.0725572
ILMN_1663160	-0.072544
ILMN_2186369	-0.0725047
ILMN_1911605	-0.0724863
ILMN_2391264	-0.0724406
ILMN_1692790	-0.0724281
ILMN_1762281	-0.0723855
ILMN_2141941	-0.0723578
ILMN_2410771	-0.0723523
ILMN_1721008	-0.0723475
ILMN_1762115	-0.0723472
ILMN_1755051	-0.0723356
ILMN_1763670	-0.0723267
ILMN_2208158	-0.0723067
ILMN_1666364	-0.0722989
ILMN_1784256	-0.0722183
ILMN_1798395	-0.0722043
ILMN_1779182	-0.0720658
ILMN_1761996	-0.0720621
ILMN_2379520	-0.0720534
ILMN_1687782	-0.0719762
ILMN_1711049	-0.0719433
ILMN_1677919	-0.0719399
ILMN_2200917	-0.0719262
ILMN_2181892	-0.0719156
ILMN_1667564	-0.0719076
ILMN_1726930	-0.0718884
ILMN_1859863	-0.0718598
ILMN_1704154	-0.0718369
ILMN_2396272	-0.0718349
ILMN_1689446	-0.0717853
ILMN_1807894	-0.0717813
ILMN_1698725	-0.0717784
ILMN_2143148	-0.0717662
ILMN_2152828	-0.0716668
ILMN_1679727	-0.0716506
ILMN_2323774	-0.0716
ILMN_1745343	-0.0715941
ILMN_2410986	-0.0715937
ILMN_1680110	-0.071564
ILMN_1801246	-0.0714512
ILMN_1665526	-0.0714489
ILMN_1672122	-0.0714422
ILMN_2394523	-0.0714344
ILMN_1700915	-0.071404
ILMN_1664798	-0.071397
ILMN_1767691	-0.0713946
ILMN_1813645	-0.0713768
ILMN_1764494	-0.0713711
ILMN_2153916	-0.0713217
ILMN_1691418	-0.0713002
ILMN_2145423	-0.0712753
ILMN_2337263	-0.0711696
ILMN_1740861	-0.0711531
ILMN_1700081	-0.0711478
ILMN_1682572	-0.0711443
ILMN_1705241	-0.0711166
ILMN_1673795	-0.0711064
ILMN_1773109	-0.0711011
ILMN_1808783	-0.0710979
ILMN_1752631	-0.0710482
ILMN_2219556	-0.071011
ILMN_2149566	-0.0709997
ILMN_1697153	-0.0709974
ILMN_1687518	-0.0709908
ILMN_2232520	-0.0709852
ILMN_1776788	-0.0709603
ILMN_2331082	-0.0709274
ILMN_1778836	-0.0709154
ILMN_2098947	-0.0708903
ILMN_1689070	-0.0708856
ILMN_1842582	-0.070876
ILMN_1687864	-0.0708742
ILMN_1902308	-0.0708677
ILMN_1758392	-0.0708249
ILMN_1661833	-0.0708063
ILMN_1782513	-0.0707741
ILMN_1726239	-0.0707662
ILMN_1698673	-0.0707444
ILMN_1670099	-0.0707436
ILMN_1789266	-0.0707306
ILMN_1660000	-0.0707106
ILMN_2328835	-0.070679
ILMN_1713402	-0.0706653
ILMN_1694325	-0.0706254
ILMN_1711414	-0.0705059
ILMN_1745256	-0.0705039
ILMN_2336647	-0.0705019
ILMN_1791949	-0.0704458
ILMN_1721167	-0.0704415
ILMN_2363250	-0.0704354
ILMN_1749838	-0.0704111
ILMN_1659599	-0.0703608
ILMN_1708516	-0.0703515
ILMN_1736940	-0.0703396
ILMN_1651628	-0.0703241
ILMN_2378868	-0.0703019
ILMN_1721704	-0.070282
ILMN_1729318	-0.0702525
ILMN_1665235	-0.070187
ILMN_1793894	-0.0701559
ILMN_2295518	-0.0701524
ILMN_1738854	-0.0701515
ILMN_1795298	-0.0701498
ILMN_1774350	-0.0701482
ILMN_2306077	-0.0701455
ILMN_2224833	-0.0701214
ILMN_1651329	-0.0701081
ILMN_1754727	-0.0700987
ILMN_1882764	-0.070068
ILMN_1815107	-0.0700329
ILMN_1666746	-0.0700262
ILMN_1715505	-0.0699977
ILMN_1693853	-0.0699661
ILMN_1769259	-0.0699661
ILMN_2222880	-0.0699244
ILMN_1700028	-0.0699089
ILMN_1695598	-0.0699059
ILMN_1756086	-0.0698866
ILMN_1680246	-0.0698463
ILMN_1681092	-0.0698361
ILMN_2163306	-0.0698342
ILMN_2341254	-0.0698215
ILMN_1709590	-0.0697811
ILMN_1682738	-0.0697298
ILMN_1770339	-0.0697016
ILMN_1737343	-0.0696972
ILMN_1669696	-0.0696154
ILMN_1767612	-0.0695316
ILMN_1796063	-0.0695186
ILMN_1758673	-0.0695029
ILMN_1811632	-0.069492
ILMN_1664773	-0.0694584
ILMN_1808824	-0.069458
ILMN_2215824	-0.0694496
ILMN_1705310	-0.0694379
ILMN_1790603	-0.0694064
ILMN_2391765	-0.0693573
ILMN_1660986	-0.0693538
ILMN_1672843	-0.0693475
ILMN_1780659	-0.0693455
ILMN_1655051	-0.0693079
ILMN_1767848	-0.0692815
ILMN_2203729	-0.0692646
ILMN_1725169	-0.0692127
ILMN_2073592	-0.0691679
ILMN_2398926	-0.069165
ILMN_1754757	-0.0691571
ILMN_2192693	-0.0691422
ILMN_1829845	-0.0691236
ILMN_1875342	-0.0690486
ILMN_2387712	-0.0690201
ILMN_1743361	-0.0690152
ILMN_1685042	-0.0689769
ILMN_2357855	-0.0689756
ILMN_1804988	-0.068962
ILMN_1745374	-0.0689608
ILMN_1734194	-0.0689304
ILMN_2290618	-0.0688774
ILMN_1765091	-0.0688657
ILMN_1657682	-0.0687941
ILMN_2363634	-0.0687613
ILMN_1752303	-0.0687587
ILMN_1781285	-0.0686857
ILMN_1795822	-0.0685941
ILMN_1815656	-0.0685904
ILMN_1759563	-0.0685889
ILMN_2409062	-0.0685688
ILMN_1719883	-0.0685403
ILMN_2163796	-0.0685208
ILMN_1659725	-0.0685202
ILMN_1654357	-0.068519
ILMN_1791467	-0.0684785
ILMN_2139035	-0.0684144
ILMN_1770245	-0.0684035
ILMN_1763539	-0.0683794
ILMN_2038774	-0.0683732
ILMN_1717524	-0.068347
ILMN_1795911	-0.0683221
ILMN_1698209	-0.0683154
ILMN_1714850	-0.0683133
ILMN_1753279	-0.06827
ILMN_2166831	-0.0682433
ILMN_2159290	-0.0681927
ILMN_1663037	-0.0681683
ILMN_1745826	-0.0681366
ILMN_2187830	-0.0681331
ILMN_2391861	-0.0680807
ILMN_1769449	-0.0680505
ILMN_1746396	-0.0680229
ILMN_2113490	-0.0679929
ILMN_2275297	-0.0679849
ILMN_1659786	-0.0679666
ILMN_1809511	-0.0679414
ILMN_2377174	-0.0679029
ILMN_1915188	-0.0678751
ILMN_1715680	-0.067839
ILMN_1763198	-0.0678297
ILMN_1766551	-0.067799
ILMN_1737644	-0.067792
ILMN_2370091	-0.0677654
ILMN_1691112	-0.0677544
ILMN_1666933	-0.0676999
ILMN_1689162	-0.0676773
ILMN_1769673	-0.0676716
ILMN_1654598	-0.0676592
ILMN_1757272	-0.0676549
ILMN_2295987	-0.0676492
ILMN_1689327	-0.0676166
ILMN_1714428	-0.0676154
ILMN_2124064	-0.0676128
ILMN_1717326	-0.0675957
ILMN_1755221	-0.0675871
ILMN_1725193	-0.0675637
ILMN_1705849	-0.0675238
ILMN_1744118	-0.067515
ILMN_2349006	-0.0674964
ILMN_1662964	-0.0674931
ILMN_1815154	-0.0674864
ILMN_1675617	-0.0674308
ILMN_1732071	-0.0674192
ILMN_1811387	-0.0674108
ILMN_1662848	-0.0673979
ILMN_1790160	-0.0673956
ILMN_1654217	-0.0673934
ILMN_1688022	-0.0673633
ILMN_2085236	-0.0673282
ILMN_1679324	-0.0672631
ILMN_1773427	-0.0672129
ILMN_2075643	-0.0671885
ILMN_2398274	-0.0671871
ILMN_1663399	-0.0671765
ILMN_1749962	-0.0671656
ILMN_1707810	-0.0671573
ILMN_2281734	-0.0671545
ILMN_1790859	-0.0671216
ILMN_2134974	-0.0671064
ILMN_1746031	-0.0670731
ILMN_1677314	-0.0670466
ILMN_1658743	-0.0670173
ILMN_2365479	-0.0669917
ILMN_2396292	-0.0669819
ILMN_1680781	-0.0669755
ILMN_1837219	-0.066972
ILMN_1705346	-0.0669527
ILMN_1809101	-0.066931
ILMN_1680208	-0.0669262
ILMN_1718198	-0.0669132
ILMN_2195821	-0.0668899
ILMN_2402416	-0.0668835
ILMN_1729691	-0.0668824
ILMN_1870303	-0.0668397
ILMN_1763433	-0.0668391
ILMN_1659206	-0.0668371
ILMN_1813607	-0.0668065
ILMN_1665492	-0.06676
ILMN_1799128	-0.0667455
ILMN_1755862	-0.0667402
ILMN_1714709	-0.0667271
ILMN_2306955	-0.0667195
ILMN_2357770	-0.0667123
ILMN_2215418	-0.0667105
ILMN_2128293	-0.0667043
ILMN_1800008	-0.066703
ILMN_2111918	-0.0666925
ILMN_1678490	-0.0666712
ILMN_1858599	-0.0666511
ILMN_1732053	-0.0666506
ILMN_1835847	-0.0666392
ILMN_1659923	-0.0666295
ILMN_1903049	-0.0666038
ILMN_1659371	-0.0665755
ILMN_2091310	-0.0665436
ILMN_1706598	-0.0665289
ILMN_1669366	-0.0664955
ILMN_2135321	-0.0664872
ILMN_1722056	-0.0664814
ILMN_1753868	-0.0664696
ILMN_1745813	-0.0664661
ILMN_2116366	-0.0664577
ILMN_1718988	-0.0664532
ILMN_1814215	-0.0664457
ILMN_2372398	-0.0664146
ILMN_1699357	-0.0664021
ILMN_1803423	-0.0663956
ILMN_1697820	-0.0663841
ILMN_1672000	-0.0662914
ILMN_1698668	-0.0662492
ILMN_1735045	-0.0662396
ILMN_1665148	-0.0662103
ILMN_1718629	-0.0661892
ILMN_1776515	-0.0661849
ILMN_2387105	-0.0661703
ILMN_1801664	-0.066164
ILMN_1687827	-0.0661562
ILMN_1798189	-0.066156
ILMN_1738707	-0.0661194
ILMN_1766200	-0.0661165
ILMN_1658861	-0.0661017
ILMN_1781906	-0.0660929
ILMN_1776967	-0.0660732
ILMN_1701165	-0.0659534
ILMN_1803813	-0.0659459
ILMN_1678423	-0.0659105
ILMN_2352580	-0.065893
ILMN_2402341	-0.0658567
ILMN_2341363	-0.0658445
ILMN_2044027	-0.0658401
ILMN_1665571	-0.065779
ILMN_1715926	-0.065772
ILMN_1715569	-0.0657581
ILMN_1673352	-0.0657507
ILMN_2229214	-0.0657268
ILMN_1705469	-0.0656875
ILMN_2193752	-0.0656688
ILMN_1780773	-0.0656493
ILMN_1738632	-0.0655677
ILMN_1769382	-0.0655535
ILMN_1792931	-0.0655507
ILMN_1696494	-0.0655474
ILMN_1675857	-0.0655386
ILMN_1767722	-0.0655378
ILMN_1687683	-0.0655294
ILMN_2125675	-0.0654813
ILMN_2351309	-0.065476
ILMN_1688639	-0.0654606
ILMN_1761762	-0.0654379
ILMN_1704476	-0.0654146
ILMN_1734428	-0.0654119
ILMN_1747395	-0.0654071
ILMN_1724832	-0.0653882
ILMN_1764230	-0.0653828
ILMN_1657679	-0.0653598
ILMN_1776723	-0.065317
ILMN_2354140	-0.0652809
ILMN_1822495	-0.0652805
ILMN_1699648	-0.0652766
ILMN_1698427	-0.0652727
ILMN_1695606	-0.0652714
ILMN_1664398	-0.0652553
ILMN_1794490	-0.0652405
ILMN_1698940	-0.0651111
ILMN_1721922	-0.0650565
ILMN_2384056	-0.065053
ILMN_2145396	-0.0649885
ILMN_2339863	-0.0649636
ILMN_1708936	-0.0649272
ILMN_1693664	-0.0649066
ILMN_2230016	-0.0649017
ILMN_1808041	-0.0648962
ILMN_1795257	-0.0648664
ILMN_1679134	-0.0648618
ILMN_1751452	-0.0648429
ILMN_1731044	-0.0648408
ILMN_1657373	-0.0647996
ILMN_1701441	-0.0647762
ILMN_1769116	-0.0647556
ILMN_1733305	-0.06473
ILMN_1702519	-0.0647096
ILMN_2263466	-0.064656
ILMN_1660186	-0.0646398
ILMN_1659550	-0.0646175
ILMN_2072541	-0.0645844
ILMN_1839019	-0.0645748
ILMN_2313378	-0.0645406
ILMN_2179533	-0.06453
ILMN_1691557	-0.0645238
ILMN_1713829	-0.0644468
ILMN_2274199	-0.0643727
ILMN_2143250	-0.064347
ILMN_1722276	-0.0643326
ILMN_2160388	-0.064324
ILMN_1697409	-0.0643223
ILMN_1668766	-0.064287
ILMN_2343105	-0.0642572
ILMN_1700144	-0.0642486
ILMN_1668507	-0.0642481
ILMN_1724207	-0.0642026
ILMN_1813766	-0.0641372
ILMN_1654212	-0.0640825
ILMN_2175894	-0.0640788
ILMN_1760246	-0.0640312
ILMN_1811729	-0.0640112
ILMN_2362245	-0.0639867
ILMN_1767894	-0.0639841
ILMN_2154053	-0.0639821
ILMN_1723123	-0.0639762
ILMN_1692020	-0.0639611
ILMN_2361643	-0.0639598
ILMN_1652128	-0.0639366
ILMN_1669703	-0.0639357
ILMN_1784630	-0.0638834
ILMN_1796059	-0.0638643
ILMN_1672006	-0.0638345
ILMN_1683328	-0.0638224
ILMN_1763638	-0.0637901
ILMN_1686804	-0.0637898
ILMN_1733904	-0.0637861
ILMN_1672961	-0.0637812
ILMN_1739497	-0.0637611
ILMN_1660577	-0.0637586
ILMN_1665601	-0.0637554
ILMN_1722894	-0.0637403
ILMN_2138435	-0.0637221
ILMN_1770850	-0.0636766
ILMN_2225577	-0.0636739
ILMN_1774229	-0.0636669
ILMN_1725760	-0.0636443
ILMN_1782015	-0.0636327
ILMN_1666258	-0.0636234
ILMN_2140990	-0.0636226
ILMN_1656920	-0.0636136
ILMN_1810810	-0.0635959
ILMN_2410965	-0.0635762
ILMN_1730639	-0.0635107
ILMN_1688295	-0.0634686
ILMN_2167416	-0.0634229
ILMN_2344120	-0.0634182
ILMN_1738955	-0.0634094
ILMN_2234758	-0.063374
ILMN_1680624	-0.0633674
ILMN_1753482	-0.0633513
ILMN_1747244	-0.0633277
ILMN_2196097	-0.0633066
ILMN_1666004	-0.0633012
ILMN_1788988	-0.0632993
ILMN_1678652	-0.0632494
ILMN_1758806	-0.0632388
ILMN_1764500	-0.0632038
ILMN_1715947	-0.0631989
ILMN_1743371	-0.0631902
ILMN_1656791	-0.0631544
ILMN_2358474	-0.0631424
ILMN_2365595	-0.0631257
ILMN_2148469	-0.0631188
ILMN_2166972	-0.0631131
ILMN_2124241	-0.0630599
ILMN_1766902	-0.0630417
ILMN_1735762	-0.063035
ILMN_1714461	-0.0630348
ILMN_1803720	-0.063034
ILMN_2407082	-0.0630281
ILMN_1741392	-0.0629511
ILMN_1791702	-0.0629442
ILMN_1705922	-0.0628954
ILMN_1797191	-0.0628897
ILMN_1729208	-0.0628308
ILMN_1792837	-0.0628147
ILMN_1688953	-0.0627978
ILMN_2313901	-0.0627792
ILMN_1700477	-0.0627655
ILMN_1796458	-0.0627302
ILMN_1662795	-0.0627227
ILMN_1806149	-0.0626841
ILMN_1752935	-0.0626823
ILMN_1781077	-0.0626731
ILMN_1757350	-0.062667
ILMN_2149782	-0.0626534
ILMN_1779423	-0.0626157
ILMN_1738402	-0.0626067
ILMN_1753490	-0.0625999
ILMN_1676075	-0.0625958
ILMN_2205032	-0.0625877
ILMN_1686948	-0.0625832
ILMN_1700728	-0.0625776
ILMN_1654497	-0.0625596
ILMN_1760245	-0.0625531
ILMN_1727526	-0.0625425
ILMN_1693293	-0.0625365
ILMN_2409642	-0.0625157
ILMN_1664348	-0.062472
ILMN_1668411	-0.0624571
ILMN_1811890	-0.0624568
ILMN_1661593	-0.0624163
ILMN_1697742	-0.0624151
ILMN_1729058	-0.0623851
ILMN_1704362	-0.0623644
ILMN_1705515	-0.0623564
ILMN_1708369	-0.0623501
ILMN_1729281	-0.0623471
ILMN_1755352	-0.0623232
ILMN_1659752	-0.0622645
ILMN_2398587	-0.0622513
ILMN_1782305	-0.0622323
ILMN_1779997	-0.0622184
ILMN_1655504	-0.0621962
ILMN_1658830	-0.0621872
ILMN_1673521	-0.0621789
ILMN_2400250	-0.0621415
ILMN_1741204	-0.062109
ILMN_2211065	-0.0620364
ILMN_2157510	-0.0620277
ILMN_1786893	-0.0620058
ILMN_2240597	-0.0620035
ILMN_1756590	-0.0619977
ILMN_1692511	-0.0619906
ILMN_1795104	-0.0619866
ILMN_2400644	-0.0619612
ILMN_1680130	-0.0619596
ILMN_1790412	-0.0619386
ILMN_1765208	-0.0619278
ILMN_1790953	-0.0619121
ILMN_1801121	-0.0618955
ILMN_1901769	-0.0618813
ILMN_1754149	-0.0618702
ILMN_1667577	-0.0618496
ILMN_1795845	-0.0618315
ILMN_1687921	-0.0618303
ILMN_1751569	-0.06183
ILMN_1685077	-0.0618013
ILMN_1693645	-0.0617987
ILMN_1698419	-0.0617635
ILMN_1790807	-0.0617585
ILMN_2406586	-0.0617136
ILMN_1752117	-0.0617076
ILMN_1738438	-0.0616937
ILMN_1724612	-0.0616855
ILMN_1796244	-0.0616829
ILMN_1798679	-0.0616824
ILMN_1789407	-0.0616601
ILMN_1771629	-0.0616578
ILMN_1715384	-0.061648
ILMN_2407824	-0.061646
ILMN_1809583	-0.0616142
ILMN_2373755	-0.0615987
ILMN_1775853	-0.0615912
ILMN_1746561	-0.061584
ILMN_1683377	-0.0615778
ILMN_2080684	-0.0615324
ILMN_1682857	-0.061516
ILMN_1688452	-0.0615112
ILMN_1761278	-0.0615008
ILMN_1765796	-0.0614893
ILMN_1815723	-0.0614637
ILMN_1739558	-0.0614554
ILMN_1687821	-0.0614551
ILMN_1761999	-0.0614113
ILMN_2354649	-0.0613861
ILMN_1851453	-0.061356
ILMN_1696317	-0.061355
ILMN_1701947	-0.0613427
ILMN_1871288	-0.061339
ILMN_1843932	-0.0613333
ILMN_1803772	-0.0613316
ILMN_2234709	-0.0613302
ILMN_1758229	-0.0613024
ILMN_1768732	-0.0613007
ILMN_1893764	-0.0612725
ILMN_2389528	-0.0612637
ILMN_2356311	-0.0612623
ILMN_2100437	-0.0612579
ILMN_1699674	-0.0612467
ILMN_1771326	-0.0612209
ILMN_2054461	-0.0612167
ILMN_1740571	-0.0611206
ILMN_1685854	-0.0610863
ILMN_1750785	-0.0610824
ILMN_1805750	-0.0610797
ILMN_1703301	-0.0610687
ILMN_1673543	-0.0610459
ILMN_1654064	-0.0610424
ILMN_1732534	-0.0610314
ILMN_1692486	-0.0610188
ILMN_1658071	-0.0609973
ILMN_2127477	-0.0609914
ILMN_1686645	-0.0609642
ILMN_1730039	-0.0609146
ILMN_1688404	-0.0609018
ILMN_1760049	-0.0609016
ILMN_2266309	-0.0608977
ILMN_1714952	-0.0608529
ILMN_1769601	-0.0608273
ILMN_1739170	-0.0607858
ILMN_1667429	-0.0607829
ILMN_2383305	-0.0607816
ILMN_1750373	-0.0607791
ILMN_2331729	-0.0607662
ILMN_1661653	-0.0607584
ILMN_1801302	-0.0607128
ILMN_1706958	-0.0606877
ILMN_2233878	-0.0606761
ILMN_1759023	-0.0606746
ILMN_1741391	-0.0606346
ILMN_1654851	-0.0606154
ILMN_2199439	-0.0606062
ILMN_2150187	-0.0606034
ILMN_1678037	-0.0606032
ILMN_2359306	-0.0605923
ILMN_1764127	-0.0605829
ILMN_1788356	-0.0605776
ILMN_2368535	-0.060566
ILMN_1718093	-0.0605637
ILMN_2404407	-0.0605594
ILMN_2050911	-0.0605461
ILMN_1685834	-0.0605378
ILMN_1718853	-0.0604834
ILMN_1736184	-0.0604326
ILMN_2223380	-0.0604169
ILMN_1685930	-0.0604129
ILMN_1787949	-0.0603877
ILMN_1698803	-0.0603846
ILMN_1869897	-0.0603514
ILMN_1753139	-0.0603438
ILMN_1694398	-0.0603097
ILMN_1728218	-0.0603054
ILMN_2311779	-0.0602922
ILMN_1661627	-0.0602267
ILMN_2371147	-0.0602161
ILMN_1676659	-0.0602055
ILMN_1705302	-0.0601944
ILMN_2064917	-0.0601744
ILMN_1690209	-0.0601726
ILMN_1685722	-0.0601647
ILMN_1759092	-0.0601596
ILMN_1679217	-0.0601416
ILMN_1805410	-0.0601339
ILMN_1686370	-0.0601029
ILMN_1707181	-0.0601022
ILMN_2203891	-0.060095
ILMN_2385672	-0.0600744
ILMN_2387471	-0.0600298
ILMN_1726842	-0.0600208
ILMN_1751956	-0.0600085
ILMN_1778803	-0.0600068
ILMN_1714805	-0.0599663
ILMN_1673522	-0.0599591
ILMN_1718807	-0.059949
ILMN_1751264	-0.059941
ILMN_1747162	-0.0599237
ILMN_1652003	-0.059918
ILMN_1726755	-0.0598475
ILMN_1719170	-0.0598416
ILMN_1664216	-0.059839
ILMN_1729533	-0.0598225
ILMN_1786598	-0.0598092
ILMN_2336186	-0.059772
ILMN_1708110	-0.0597703
ILMN_2371685	-0.0597526
ILMN_2365465	-0.0597436
ILMN_1653039	-0.0597421
ILMN_1664424	-0.0597253
ILMN_1660086	-0.0596991
ILMN_1672743	-0.0596867
ILMN_1777190	-0.0596589
ILMN_1651554	-0.0596573
ILMN_1747318	-0.0596546
ILMN_1670037	-0.0596178
ILMN_1782079	-0.0595832
ILMN_1853631	-0.0595647
ILMN_1861270	-0.0595528
ILMN_1769264	-0.0595397
ILMN_1706873	-0.0595367
ILMN_2344298	-0.0595363
ILMN_1774258	-0.0594932
ILMN_1713178	-0.0594831
ILMN_2149164	-0.0594795
ILMN_1774869	-0.059398
ILMN_1689088	-0.059348
ILMN_1722533	-0.0593471
ILMN_1812031	-0.0593437
ILMN_1718483	-0.0593078
ILMN_2373566	-0.0592761
ILMN_1790918	-0.0592562
ILMN_1908989	-0.05925
ILMN_1710885	-0.0592423
ILMN_1788878	-0.059237
ILMN_1722290	-0.0592013
ILMN_2169966	-0.0591882
ILMN_1652333	-0.0591712
ILMN_1665040	-0.0591653
ILMN_1664750	-0.0591578
ILMN_2376194	-0.0591529
ILMN_1701653	-0.0591464
ILMN_1744635	-0.0591364
ILMN_1761456	-0.0591216
ILMN_1798085	-0.0590838
ILMN_1666635	-0.0590678
ILMN_1780842	-0.0590665
ILMN_1784516	-0.0590585
ILMN_1787885	-0.0590235
ILMN_1790230	-0.058936
ILMN_1793201	-0.058931
ILMN_1759883	-0.0588821
ILMN_1758545	-0.0588428
ILMN_1810058	-0.0588342
ILMN_1810104	-0.0587967
ILMN_1719998	-0.0587863
ILMN_1679299	-0.0587747
ILMN_2314007	-0.0587439
ILMN_1696187	-0.0587373
ILMN_1797974	-0.0586867
ILMN_1707350	-0.0586442
ILMN_1776052	-0.0586341
ILMN_2398627	-0.0586307
ILMN_2399300	-0.0586221
ILMN_1713394	-0.0586173
ILMN_1675878	-0.0586109
ILMN_1687080	-0.0586051
ILMN_1693259	-0.0585764
ILMN_2319994	-0.0584931
ILMN_1743621	-0.0584851
ILMN_1759948	-0.0584058
ILMN_1710303	-0.0584012
ILMN_1662328	-0.0583461
ILMN_2050790	-0.0583393
ILMN_1688160	-0.0583295
ILMN_1690063	-0.0583259
ILMN_2064237	-0.0583219
ILMN_1700349	-0.0582982
ILMN_1728999	-0.0582828
ILMN_1754811	-0.0582504
ILMN_1717461	-0.0582409
ILMN_1682864	-0.0582397
ILMN_1741131	-0.058232
ILMN_1676523	-0.0581903
ILMN_2411116	-0.0581848
ILMN_1804834	-0.058161
ILMN_1692156	-0.058152
ILMN_1803773	-0.0580981
ILMN_1813456	-0.0580821
ILMN_1723886	-0.0580592
ILMN_2232084	-0.0580549
ILMN_2065745	-0.0580372
ILMN_1788184	-0.0580345
ILMN_2062754	-0.0580336
ILMN_1668795	-0.0580058
ILMN_2339955	-0.0580033
ILMN_1661802	-0.0579136
ILMN_1666633	-0.0579086
ILMN_1753515	-0.0578976
ILMN_1683854	-0.0578728
ILMN_1691559	-0.0578585
ILMN_1651735	-0.0578545
ILMN_1790650	-0.0578503
ILMN_1765076	-0.0578503
ILMN_1677440	-0.0578332
ILMN_2106449	-0.0578294
ILMN_1695413	-0.0578176
ILMN_2340052	-0.0578017
ILMN_1695092	-0.0577917
ILMN_1691702	-0.0577727
ILMN_1668351	-0.0577641
ILMN_1781098	-0.0577585
ILMN_2338116	-0.0577074
ILMN_1782385	-0.057694
ILMN_1772296	-0.0576908
ILMN_1774990	-0.0576899
ILMN_1699472	-0.0576768
ILMN_1796835	-0.0576692
ILMN_1666617	-0.0576523
ILMN_1779171	-0.0576501
ILMN_2203876	-0.0576478
ILMN_1766366	-0.0576425
ILMN_1691942	-0.0576412
ILMN_1697919	-0.0576293
ILMN_1725906	-0.057622
ILMN_1706539	-0.0576136
ILMN_1721801	-0.0576133
ILMN_1684726	-0.0575901
ILMN_1756541	-0.0575273
ILMN_1671693	-0.0575228
ILMN_1764980	-0.057501
ILMN_2393046	-0.0574978
ILMN_1795218	-0.057485
ILMN_1738604	-0.0574745
ILMN_1677824	-0.0574738
ILMN_1795247	-0.0574695
ILMN_1746494	-0.0574549
ILMN_1677951	-0.0574327
ILMN_1658460	-0.0574171
ILMN_1655497	-0.0573423
ILMN_1811261	-0.0573144
ILMN_1729142	-0.0573001
ILMN_1703108	-0.0572955
ILMN_1654671	-0.0572913
ILMN_1656420	-0.0572894
ILMN_1764087	-0.0572589
ILMN_1706397	-0.0572547
ILMN_1680659	-0.0572492
ILMN_1764827	-0.057243
ILMN_2273572	-0.0572342
ILMN_1652464	-0.0572249
ILMN_1739770	-0.0572036
ILMN_1728907	-0.0572017
ILMN_1690304	-0.0571516
ILMN_2324672	-0.0571433
ILMN_1802358	-0.0571383
ILMN_2293992	-0.0571379
ILMN_2194828	-0.0571336
ILMN_1671800	-0.0571188
ILMN_1763007	-0.0570931
ILMN_1689146	-0.0570928
ILMN_1729225	-0.0570523
ILMN_1689296	-0.0570185
ILMN_1844142	-0.0570074
ILMN_1675979	-0.0570038
ILMN_2052871	-0.056992
ILMN_1774617	-0.0569854
ILMN_1718961	-0.0569814
ILMN_1666706	-0.0569596
ILMN_1912417	-0.0569133
ILMN_1676091	-0.0569103
ILMN_1690844	-0.0569036
ILMN_1743095	-0.0568995
ILMN_1739161	-0.056892
ILMN_1752895	-0.0568686
ILMN_2047676	-0.0568657
ILMN_1758798	-0.0568536
ILMN_1736628	-0.0568316
ILMN_1772486	-0.0567194
ILMN_2358647	-0.0566987
ILMN_1836958	-0.0566977
ILMN_1738656	-0.056697
ILMN_1760294	-0.0566263
ILMN_1787923	-0.0566122
ILMN_1756723	-0.0566114
ILMN_1906727	-0.056607
ILMN_1696591	-0.0566046
ILMN_1669832	-0.056587
ILMN_1815063	-0.0565695
ILMN_1801236	-0.0565683
ILMN_1809027	-0.0565659
ILMN_1791580	-0.0565575
ILMN_2379240	-0.056553
ILMN_1797384	-0.05654
ILMN_1787808	-0.0565319
ILMN_1745887	-0.0565016
ILMN_1659415	-0.056498
ILMN_1681304	-0.0564729
ILMN_1665730	-0.0564653
ILMN_1717975	-0.0564345
ILMN_1660439	-0.0564238
ILMN_1672366	-0.0563995
ILMN_2175131	-0.0563784
ILMN_1782609	-0.0563711
ILMN_1736577	-0.0563616
ILMN_1662306	-0.0563591
ILMN_1697597	-0.0562976
ILMN_2327780	-0.0562942
ILMN_1710268	-0.0562901
ILMN_2112829	-0.0562853
ILMN_1723116	-0.0562577
ILMN_2395856	-0.0562488
ILMN_2083333	-0.0562293
ILMN_1690480	-0.056228
ILMN_1788017	-0.0562202
ILMN_1715482	-0.0562181
ILMN_2049303	-0.0561921
ILMN_2372199	-0.05616
ILMN_2229379	-0.056151
ILMN_1718808	-0.0561399
ILMN_1814924	-0.0561222
ILMN_1704024	-0.0561091
ILMN_2174805	-0.056098
ILMN_1689578	-0.0560975
ILMN_1700733	-0.0560768
ILMN_2224031	-0.0560709
ILMN_2180624	-0.0560682
ILMN_1696991	-0.0560513
ILMN_1711792	-0.0560465
ILMN_2149766	-0.056036
ILMN_2400326	-0.0560236
ILMN_1708627	-0.0560024
ILMN_1699606	-0.0559778
ILMN_1795063	-0.0559428
ILMN_1676002	-0.0559327
ILMN_1770412	-0.0559246
ILMN_2343278	-0.0559188
ILMN_1774427	-0.0558619
ILMN_1737857	-0.0558368
ILMN_2215119	-0.0558089
ILMN_1755134	-0.0558019
ILMN_2140700	-0.0557915
ILMN_1735822	-0.0557609
ILMN_2089167	-0.0557596
ILMN_1760714	-0.0557594
ILMN_1680348	-0.0557558
ILMN_1701244	-0.0557521
ILMN_1797155	-0.0557491
ILMN_2189458	-0.0557465
ILMN_1809433	-0.0557446
ILMN_2182531	-0.0557356
ILMN_1676503	-0.055711
ILMN_1697469	-0.0557097
ILMN_1753823	-0.055704
ILMN_2378048	-0.0556984
ILMN_2374683	-0.0556679
ILMN_1772064	-0.0556466
ILMN_1770911	-0.0556418
ILMN_2271149	-0.0556263
ILMN_1696419	-0.0556226
ILMN_1667796	-0.0556156
ILMN_2186061	-0.0556013
ILMN_1729368	-0.0555995
ILMN_1783956	-0.0555547
ILMN_1796801	-0.0555332
ILMN_1743939	-0.055527
ILMN_1722738	-0.0555172
ILMN_1703471	-0.0555039
ILMN_1701696	-0.0554978
ILMN_2078264	-0.0554878
ILMN_1810712	-0.0554711
ILMN_1745415	-0.0554606
ILMN_1737254	-0.0554602
ILMN_2392286	-0.055459
ILMN_2369924	-0.0554334
ILMN_1703316	-0.0554221
ILMN_1674855	-0.0554138
ILMN_1797875	-0.0553978
ILMN_1700238	-0.055391
ILMN_1675083	-0.0553783
ILMN_1728923	-0.0553732
ILMN_1682658	-0.0553684
ILMN_1683194	-0.0553375
ILMN_1723007	-0.0553287
ILMN_1665964	-0.0553268
ILMN_1815668	-0.0552941
ILMN_1693882	-0.0552922
ILMN_2369286	-0.0552592
ILMN_1749521	-0.055241
ILMN_1653646	-0.0552404
ILMN_1659273	-0.05523
ILMN_2351241	-0.0552237
ILMN_2326262	-0.05519
ILMN_1714567	-0.0551808
ILMN_1805132	-0.0551655
ILMN_1797701	-0.0551529
ILMN_2153466	-0.0551462
ILMN_1758825	-0.055142
ILMN_1655545	-0.0551093
ILMN_1768202	-0.0550883
ILMN_1715886	-0.0550821
ILMN_1694233	-0.0550818
ILMN_1676986	-0.0550814
ILMN_1745282	-0.0550706
ILMN_1679188	-0.0550446
ILMN_1728676	-0.0550422
ILMN_2326273	-0.0550295
ILMN_1672287	-0.0550193
ILMN_1694823	-0.0550046
ILMN_1653494	-0.0549328
ILMN_1762766	-0.0549243
ILMN_1773082	-0.0549152
ILMN_1788961	-0.0549152
ILMN_1785191	-0.0549068
ILMN_1735474	-0.0549046
ILMN_1823690	-0.0548964
ILMN_1756360	-0.0548891
ILMN_1743753	-0.0548768
ILMN_2174612	-0.0548658
ILMN_1670452	-0.0548564
ILMN_1699631	-0.0548351
ILMN_2111229	-0.0548014
ILMN_2053829	-0.054789
ILMN_1761084	-0.0547877
ILMN_1683682	-0.0547725
ILMN_1788223	-0.0547649
ILMN_1682929	-0.0547334
[truncated: 46,804 more rows]

## Sheet: CM1.Basal-like
Probe_ID	CM1 score		Graphs																	Top CM1 score, negative	Probe_ID	Top CM1 score, positive
ILMN_1811387	-0.520516																			-0.520516	ILMN_1811387
ILMN_1766650	-0.477997																			-0.477997	ILMN_1766650
ILMN_1728787	-0.461037																			-0.461037	ILMN_1728787
ILMN_1678535	-0.43992																			-0.43992	ILMN_1678535
ILMN_1796059	-0.390162																			-0.390162	ILMN_1796059
ILMN_1795342	-0.389517																			-0.389517	ILMN_1795342
ILMN_1703891	-0.383862																			-0.383862	ILMN_1703891
ILMN_2066088	-0.380935																			-0.380935	ILMN_2066088
ILMN_2161330	-0.374987																			-0.374987	ILMN_2161330
ILMN_1722489	-0.364004																			-0.364004	ILMN_1722489
ILMN_2365465	-0.356729																			-0.356729	ILMN_2365465
ILMN_1730977	-0.355652																			-0.355652	ILMN_1730977
ILMN_1697460	-0.355427																			-0.355427	ILMN_1697460
ILMN_1809433	-0.354515																			-0.354515	ILMN_1809433
ILMN_2406656	-0.353675																			-0.353675	ILMN_2406656
ILMN_1720998	-0.351027																			-0.351027	ILMN_1720998
ILMN_1745501	-0.345626																			-0.345626	ILMN_1745501
ILMN_2092077	-0.343202																			-0.343202	ILMN_2092077
ILMN_1688071	-0.341755																			-0.341755	ILMN_1688071
ILMN_1651329	-0.341647																			-0.341647	ILMN_1651329
ILMN_1719250	-0.340164																			-0.340164	ILMN_1719250
ILMN_1813607	-0.333205																			-0.333205	ILMN_1813607
ILMN_2310814	-0.323653																			-0.323653	ILMN_2310814
ILMN_1781745	-0.323389																			-0.323389	ILMN_1781745
ILMN_1755741	-0.320802																			-0.320802	ILMN_1755741
ILMN_1814151	-0.314643																				ILMN_1713813	0.319183
ILMN_1803073	-0.313486																				ILMN_1693218	0.319266
ILMN_2269256	-0.313289																				ILMN_1654319	0.319404
ILMN_1711894	-0.309206																				ILMN_1743620	0.320488
ILMN_1709634	-0.306049																				ILMN_1769849	0.321106
ILMN_1802205	-0.303382																				ILMN_1786720	0.326234
ILMN_1898518	-0.302015																				ILMN_1780255	0.329542
ILMN_1695397	-0.300714																				ILMN_1660654	0.332343
ILMN_1826165	-0.299695																				ILMN_2353054	0.336746
ILMN_1768772	-0.297623																				ILMN_1736760	0.338555
ILMN_1674661	-0.297355																				ILMN_1800091	0.341227
ILMN_1775235	-0.296081																				ILMN_1752899	0.34458
ILMN_2311020	-0.295383																				ILMN_1781758	0.352042
ILMN_1723333	-0.294442																				ILMN_1737184	0.35617
ILMN_1700733	-0.293929																				ILMN_1663119	0.357352
ILMN_2382942	-0.288622																				ILMN_2381257	0.361973
ILMN_1781400	-0.287457																				ILMN_1719753	0.371779
ILMN_2334359	-0.287316																				ILMN_2344120	0.384799
ILMN_1669456	-0.285663																				ILMN_1721354	0.384937
ILMN_1723709	-0.28511																				ILMN_1813270	0.385739
ILMN_2108735	-0.284394																				ILMN_1692938	0.390876
ILMN_1756469	-0.283203																				ILMN_1668766	0.404729
ILMN_1728799	-0.28262																				ILMN_1807423	0.40548
ILMN_1779416	-0.281964																				ILMN_1689146	0.414155
ILMN_1716925	-0.277353																				ILMN_1738401	0.443044
ILMN_2217601	-0.275961
ILMN_2329569	-0.275163
ILMN_1680757	-0.273043
ILMN_1755721	-0.272784
ILMN_2249018	-0.272212
ILMN_2143566	-0.271583
ILMN_1680110	-0.271417
ILMN_1677108	-0.270853
ILMN_1767662	-0.270337
ILMN_1713995	-0.270008
ILMN_1670099	-0.269305
ILMN_1750394	-0.267582
ILMN_1784985	-0.263445
ILMN_1767351	-0.263342
ILMN_1759023	-0.263128
ILMN_1701918	-0.261028
ILMN_1745256	-0.26102
ILMN_1794595	-0.259317
ILMN_1683576	-0.25786
ILMN_1717052	-0.257782
ILMN_1719622	-0.255528
ILMN_1764321	-0.254558
ILMN_1844029	-0.249556
ILMN_1784783	-0.249188
ILMN_1725678	-0.24902
ILMN_1837428	-0.248346
ILMN_1753139	-0.247787
ILMN_1771482	-0.247441
ILMN_1697317	-0.247391
ILMN_1662846	-0.24717
ILMN_1664068	-0.246298
ILMN_1785570	-0.24583
ILMN_1694106	-0.245817
ILMN_2224907	-0.244866
ILMN_1811272	-0.243795
ILMN_1777644	-0.243201
ILMN_1708983	-0.242361
ILMN_1806456	-0.242182
ILMN_1656920	-0.241521
ILMN_1713892	-0.240264
ILMN_1714536	-0.240076
ILMN_2145396	-0.239809
ILMN_1790317	-0.237525
ILMN_1733746	-0.237028
ILMN_1685703	-0.23604
ILMN_1669881	-0.23599
ILMN_2405470	-0.234835
ILMN_2372136	-0.234316
ILMN_1657679	-0.233616
ILMN_2198878	-0.233459
ILMN_2175317	-0.233302
ILMN_1684571	-0.227323
ILMN_1698885	-0.227296
ILMN_1749478	-0.227184
ILMN_2336609	-0.226769
ILMN_1888359	-0.226679
ILMN_1807894	-0.226363
ILMN_1720604	-0.225909
ILMN_2153373	-0.224341
ILMN_1804328	-0.224288
ILMN_1738989	-0.223816
ILMN_1849013	-0.22239
ILMN_2128795	-0.222344
ILMN_1758941	-0.221141
ILMN_2212999	-0.22067
ILMN_1736670	-0.219749
ILMN_1722056	-0.21928
ILMN_1734190	-0.218924
ILMN_1720857	-0.218745
ILMN_2050246	-0.217002
ILMN_1682288	-0.216945
ILMN_1795118	-0.216909
ILMN_1699357	-0.216856
ILMN_1797530	-0.216844
ILMN_1730622	-0.216661
ILMN_2359698	-0.216616
ILMN_1805228	-0.216537
ILMN_1665049	-0.21618
ILMN_1677292	-0.215705
ILMN_1753766	-0.215298
ILMN_1835913	-0.214703
ILMN_1652797	-0.214344
ILMN_1668619	-0.21318
ILMN_1655195	-0.212378
ILMN_1682929	-0.211918
ILMN_2130525	-0.211628
ILMN_2081883	-0.211574
ILMN_2120247	-0.211562
ILMN_2053103	-0.210811
ILMN_1681984	-0.210193
ILMN_1688228	-0.210078
ILMN_1756727	-0.20975
ILMN_1711766	-0.209529
ILMN_1662483	-0.209511
ILMN_1874575	-0.20852
ILMN_1718771	-0.208424
ILMN_2312194	-0.207197
ILMN_2052373	-0.206898
ILMN_1797154	-0.206867
ILMN_1659206	-0.206775
ILMN_1693119	-0.206511
ILMN_1654013	-0.206257
ILMN_1693594	-0.206223
ILMN_1707342	-0.205609
ILMN_1691884	-0.2055
ILMN_1692199	-0.205138
ILMN_1686562	-0.204407
ILMN_1759772	-0.204327
ILMN_1694778	-0.20392
ILMN_1763704	-0.203511
ILMN_1687652	-0.203284
ILMN_2216637	-0.202988
ILMN_2383455	-0.202698
ILMN_2102960	-0.202586
ILMN_1678086	-0.202506
ILMN_2387952	-0.202238
ILMN_1815203	-0.201749
ILMN_1672122	-0.201557
ILMN_2387471	-0.201175
ILMN_1740842	-0.200866
ILMN_2246956	-0.20081
ILMN_1767129	-0.200736
ILMN_2125763	-0.200424
ILMN_1800590	-0.20002
ILMN_1801119	-0.199905
ILMN_1702829	-0.199846
ILMN_1696243	-0.199662
ILMN_2401927	-0.199579
ILMN_1798108	-0.199293
ILMN_1756877	-0.19877
ILMN_1746359	-0.198376
ILMN_1664750	-0.197063
ILMN_1747546	-0.196924
ILMN_1696254	-0.196764
ILMN_2146372	-0.196615
ILMN_1714167	-0.196495
ILMN_1709287	-0.196433
ILMN_1712577	-0.196358
ILMN_1657760	-0.196316
ILMN_1788149	-0.196316
ILMN_2174369	-0.196149
ILMN_1791095	-0.196085
ILMN_1795839	-0.196081
ILMN_1776602	-0.19579
ILMN_1705310	-0.195652
ILMN_1685124	-0.195546
ILMN_1748124	-0.195124
ILMN_1773780	-0.19511
ILMN_1697962	-0.195004
ILMN_1803745	-0.194848
ILMN_1669114	-0.194793
ILMN_1761941	-0.194738
ILMN_2041222	-0.194091
ILMN_2408572	-0.193601
ILMN_1674782	-0.193371
ILMN_1677080	-0.193106
ILMN_1680652	-0.192938
ILMN_2337263	-0.192488
ILMN_1722726	-0.19245
ILMN_2371911	-0.191989
ILMN_1687235	-0.191206
ILMN_1780700	-0.191182
ILMN_1776121	-0.191167
ILMN_1762561	-0.19083
ILMN_1676990	-0.190812
ILMN_2398408	-0.19069
ILMN_2311873	-0.190523
ILMN_2183692	-0.190198
ILMN_1719599	-0.190115
ILMN_1659610	-0.190078
ILMN_1737398	-0.189409
ILMN_1785284	-0.189355
ILMN_1748625	-0.188922
ILMN_1800130	-0.188919
ILMN_1655610	-0.188908
ILMN_2133534	-0.188881
ILMN_1662852	-0.188837
ILMN_1652826	-0.188403
ILMN_1810441	-0.18829
ILMN_1759910	-0.18801
ILMN_1702835	-0.187853
ILMN_1800942	-0.187811
ILMN_1770245	-0.187649
ILMN_1803673	-0.187562
ILMN_1686082	-0.187233
ILMN_2398926	-0.18706
ILMN_1735762	-0.186851
ILMN_1810915	-0.186403
ILMN_1907042	-0.186077
ILMN_1761131	-0.186027
ILMN_2404256	-0.185695
ILMN_1779517	-0.184526
ILMN_2398403	-0.184397
ILMN_1739233	-0.184356
ILMN_1685174	-0.183926
ILMN_2199313	-0.183569
ILMN_1708341	-0.183529
ILMN_2353862	-0.183032
ILMN_1710903	-0.182998
ILMN_1728550	-0.182959
ILMN_2093231	-0.18289
ILMN_1705991	-0.182498
ILMN_1667577	-0.182419
ILMN_1672124	-0.1819
ILMN_1812031	-0.181506
ILMN_1746917	-0.181471
ILMN_1708328	-0.181457
ILMN_1700515	-0.181404
ILMN_1811632	-0.181301
ILMN_1718488	-0.180294
ILMN_1709032	-0.18023
ILMN_1752793	-0.180059
ILMN_1742534	-0.179893
ILMN_1687921	-0.179796
ILMN_1731237	-0.179774
ILMN_1862217	-0.179657
ILMN_1704369	-0.179567
ILMN_1677574	-0.1795
ILMN_2196097	-0.179405
ILMN_1791232	-0.17938
ILMN_1766505	-0.178674
ILMN_1757388	-0.178484
ILMN_2113490	-0.17846
ILMN_1741422	-0.178342
ILMN_1677919	-0.17794
ILMN_2119123	-0.177678
ILMN_2119692	-0.177445
ILMN_2413323	-0.177308
ILMN_1722738	-0.177308
ILMN_1708110	-0.177163
ILMN_1802053	-0.176894
ILMN_1733875	-0.176878
ILMN_2191192	-0.176565
ILMN_2358760	-0.176169
ILMN_1772686	-0.176065
ILMN_1794863	-0.176054
ILMN_1667551	-0.175953
ILMN_1731073	-0.175778
ILMN_2281786	-0.175628
ILMN_1743055	-0.175602
ILMN_1771261	-0.175594
ILMN_1725773	-0.175462
ILMN_1687351	-0.175445
ILMN_1712985	-0.175234
ILMN_2185339	-0.175196
ILMN_1740234	-0.175084
ILMN_1693311	-0.174513
ILMN_1743065	-0.174231
ILMN_1803850	-0.173945
ILMN_1699665	-0.173914
ILMN_1749738	-0.173783
ILMN_1805796	-0.173729
ILMN_2185563	-0.173372
ILMN_1717477	-0.173143
ILMN_1677314	-0.173074
ILMN_1753426	-0.173041
ILMN_1903021	-0.172945
ILMN_1772786	-0.172941
ILMN_1696767	-0.172745
ILMN_2384536	-0.172728
ILMN_1749834	-0.172425
ILMN_1808789	-0.17213
ILMN_1811014	-0.172101
ILMN_1805104	-0.172017
ILMN_1706301	-0.17186
ILMN_1701413	-0.171849
ILMN_1673795	-0.171636
ILMN_1796113	-0.17161
ILMN_1772706	-0.171545
ILMN_1737993	-0.171064
ILMN_1663351	-0.171064
ILMN_2352090	-0.171029
ILMN_1654287	-0.171006
ILMN_1810274	-0.170671
ILMN_2330341	-0.170499
ILMN_1738718	-0.170355
ILMN_1651628	-0.170297
ILMN_2413833	-0.16985
ILMN_1735415	-0.16972
ILMN_1736965	-0.169584
ILMN_1795582	-0.169434
ILMN_1721170	-0.169201
ILMN_1697561	-0.168971
ILMN_1675483	-0.168794
ILMN_1758404	-0.168781
ILMN_1654151	-0.168606
ILMN_1711171	-0.168584
ILMN_1712583	-0.168542
ILMN_1880983	-0.16836
ILMN_1711124	-0.168277
ILMN_1712522	-0.168237
ILMN_1769264	-0.168223
ILMN_2283597	-0.168179
ILMN_1708402	-0.168074
ILMN_1700257	-0.16795
ILMN_1670926	-0.16782
ILMN_1797557	-0.1675
ILMN_1717165	-0.167455
ILMN_1729563	-0.167296
ILMN_1771057	-0.167169
ILMN_1803219	-0.167037
ILMN_1704065	-0.167014
ILMN_1761540	-0.166966
ILMN_1768534	-0.166906
ILMN_1736939	-0.166885
ILMN_1714599	-0.1668
ILMN_1658469	-0.166675
ILMN_1755281	-0.166596
ILMN_1740900	-0.166395
ILMN_1659312	-0.166381
ILMN_1667906	-0.166338
ILMN_1655117	-0.166154
ILMN_1713008	-0.165837
ILMN_2120555	-0.165764
ILMN_1663080	-0.165699
ILMN_1661778	-0.165684
ILMN_1725193	-0.165343
ILMN_1756992	-0.16532
ILMN_1728380	-0.165061
ILMN_1779015	-0.164716
ILMN_2105960	-0.164601
ILMN_1679632	-0.16436
ILMN_1707137	-0.164073
ILMN_1769092	-0.163837
ILMN_1783985	-0.163768
ILMN_2136147	-0.163644
ILMN_1770085	-0.163605
ILMN_1907649	-0.163481
ILMN_1726352	-0.163468
ILMN_1666746	-0.16344
ILMN_1692865	-0.163208
ILMN_1758392	-0.163135
ILMN_1687821	-0.162954
ILMN_1748057	-0.162879
ILMN_1671263	-0.162639
ILMN_1814327	-0.162539
ILMN_2228732	-0.162462
ILMN_2365595	-0.162401
ILMN_1879480	-0.162306
ILMN_1766551	-0.16229
ILMN_2097858	-0.162237
ILMN_1718629	-0.162201
ILMN_1788347	-0.162077
ILMN_1713449	-0.161835
ILMN_1783690	-0.161635
ILMN_1765076	-0.161522
ILMN_1772459	-0.16152
ILMN_1730734	-0.16142
ILMN_1772074	-0.161302
ILMN_1689774	-0.161255
ILMN_1733042	-0.161096
ILMN_1894057	-0.161066
ILMN_1777765	-0.161053
ILMN_1790350	-0.160899
ILMN_2151056	-0.160832
ILMN_1705116	-0.160079
ILMN_2375360	-0.160078
ILMN_1713803	-0.159764
ILMN_1680925	-0.159527
ILMN_1700563	-0.159422
ILMN_1751346	-0.159401
ILMN_1688480	-0.159387
ILMN_2375484	-0.159139
ILMN_1758049	-0.159118
ILMN_1670925	-0.158827
ILMN_1662263	-0.158809
ILMN_1668593	-0.158788
ILMN_1684690	-0.158783
ILMN_1745807	-0.158771
ILMN_1659082	-0.158742
ILMN_1766499	-0.158543
ILMN_1734366	-0.158269
ILMN_2179726	-0.158154
ILMN_1777318	-0.158105
ILMN_1718483	-0.157984
ILMN_1681310	-0.157906
ILMN_1736184	-0.157898
ILMN_2341343	-0.157745
ILMN_1693090	-0.157589
ILMN_1686841	-0.157533
ILMN_1813191	-0.157169
ILMN_1713744	-0.157083
ILMN_1790315	-0.156938
ILMN_1687037	-0.156856
ILMN_1808391	-0.156767
ILMN_1738438	-0.156617
ILMN_2094905	-0.156427
ILMN_1795704	-0.156359
ILMN_1720531	-0.156167
ILMN_2188862	-0.156112
ILMN_1713561	-0.155901
ILMN_2087692	-0.155887
ILMN_2054121	-0.155748
ILMN_1771126	-0.155673
ILMN_1802027	-0.155357
ILMN_1662587	-0.155215
ILMN_1732127	-0.15487
ILMN_1801658	-0.154851
ILMN_1804988	-0.154818
ILMN_2183784	-0.154777
ILMN_2199389	-0.154651
ILMN_1652309	-0.154619
ILMN_1703041	-0.154602
ILMN_2153916	-0.15436
ILMN_1813753	-0.154223
ILMN_1726743	-0.154043
ILMN_1658759	-0.153779
ILMN_1726928	-0.153676
ILMN_1660343	-0.153646
ILMN_1656934	-0.153548
ILMN_1707464	-0.153535
ILMN_1715324	-0.153426
ILMN_2220729	-0.153404
ILMN_2140559	-0.153348
ILMN_1712705	-0.153206
ILMN_1729237	-0.153181
ILMN_2225577	-0.153107
ILMN_1903159	-0.152927
ILMN_1684984	-0.152886
ILMN_1759232	-0.152818
ILMN_1665775	-0.152763
ILMN_1785330	-0.152718
ILMN_1672004	-0.152688
ILMN_2205896	-0.152627
ILMN_1755051	-0.152033
ILMN_1700652	-0.152017
ILMN_1746408	-0.151995
ILMN_2387214	-0.151947
ILMN_1674135	-0.151772
ILMN_1776724	-0.151679
ILMN_1675878	-0.15155
ILMN_1771962	-0.151524
ILMN_1732775	-0.151481
ILMN_1815705	-0.151392
ILMN_1738742	-0.15129
ILMN_1670870	-0.151256
ILMN_1684211	-0.151219
ILMN_1666471	-0.15114
ILMN_1811330	-0.151082
ILMN_1712305	-0.151023
ILMN_1712312	-0.15091
ILMN_2376403	-0.150765
ILMN_1689046	-0.15049
ILMN_1679217	-0.150414
ILMN_1769547	-0.150374
ILMN_1757736	-0.150131
ILMN_1684873	-0.150004
ILMN_1665865	-0.149962
ILMN_1669781	-0.149912
ILMN_1701006	-0.149886
ILMN_1728907	-0.149721
ILMN_1652602	-0.149472
ILMN_1657515	-0.149336
ILMN_1814787	-0.149307
ILMN_2206272	-0.149246
ILMN_1724211	-0.149164
ILMN_2245676	-0.148891
ILMN_1658206	-0.148851
ILMN_1734596	-0.148638
ILMN_1825249	-0.148562
ILMN_1664283	-0.14848
ILMN_1705849	-0.148478
ILMN_2214197	-0.148387
ILMN_2095273	-0.148381
ILMN_2064917	-0.148306
ILMN_1760412	-0.148218
ILMN_1782305	-0.148211
ILMN_1790455	-0.148211
ILMN_1708728	-0.148191
ILMN_1747067	-0.148148
ILMN_1659762	-0.14779
ILMN_1683148	-0.147772
ILMN_1718934	-0.147729
ILMN_1690040	-0.147559
ILMN_1687247	-0.147531
ILMN_1800220	-0.147413
ILMN_1797181	-0.147114
ILMN_1749962	-0.147071
ILMN_1718023	-0.147056
ILMN_1726108	-0.146888
ILMN_1705346	-0.146853
ILMN_1797191	-0.146764
ILMN_2325506	-0.146682
ILMN_1801703	-0.146639
ILMN_1741780	-0.146468
ILMN_1743767	-0.1463
ILMN_1797735	-0.146292
ILMN_1700831	-0.146151
ILMN_2256953	-0.146106
ILMN_2329927	-0.146061
ILMN_2356654	-0.145994
ILMN_1690223	-0.145979
ILMN_1743232	-0.145869
ILMN_1693538	-0.145679
ILMN_1781536	-0.145615
ILMN_1693762	-0.145228
ILMN_1690807	-0.14508
ILMN_1758523	-0.145021
ILMN_2316955	-0.145016
ILMN_1738300	-0.144978
ILMN_1759297	-0.144769
ILMN_1659572	-0.144661
ILMN_1684591	-0.144645
ILMN_2338997	-0.144574
ILMN_1693853	-0.144562
ILMN_1716790	-0.14453
ILMN_1690695	-0.144375
ILMN_1727589	-0.144141
ILMN_1682095	-0.144069
ILMN_2106449	-0.144023
ILMN_1807095	-0.143776
ILMN_2324574	-0.143753
ILMN_1699989	-0.143452
ILMN_2319414	-0.143417
ILMN_1701173	-0.143406
ILMN_1740920	-0.143205
ILMN_1728163	-0.143019
ILMN_1784880	-0.142784
ILMN_1754757	-0.142498
ILMN_1892608	-0.14246
ILMN_2055165	-0.14237
ILMN_1714567	-0.142278
ILMN_2043306	-0.142231
ILMN_1663171	-0.141988
ILMN_1757877	-0.141982
ILMN_1769018	-0.141965
ILMN_1719835	-0.141816
ILMN_1669465	-0.1418
ILMN_1669983	-0.141777
ILMN_1808379	-0.141762
ILMN_1694432	-0.141593
ILMN_1672000	-0.141523
ILMN_1730117	-0.141413
ILMN_1752935	-0.141293
ILMN_1678619	-0.141022
ILMN_2382505	-0.140982
ILMN_1663035	-0.140853
ILMN_2379520	-0.140848
ILMN_2157421	-0.140763
ILMN_1676631	-0.140739
ILMN_1715505	-0.140554
ILMN_1777342	-0.14046
ILMN_1681437	-0.140458
ILMN_1724207	-0.14035
ILMN_1777199	-0.140208
ILMN_1768510	-0.140199
ILMN_1728496	-0.140126
ILMN_2156936	-0.140126
ILMN_1709132	-0.140118
ILMN_1744023	-0.139997
ILMN_1661078	-0.139973
ILMN_1807649	-0.139952
ILMN_2399463	-0.139685
ILMN_2400500	-0.139597
ILMN_1676611	-0.139494
ILMN_1714108	-0.139457
ILMN_2372543	-0.139452
ILMN_1773082	-0.139297
ILMN_2289844	-0.139224
ILMN_2191568	-0.139164
ILMN_1691966	-0.139153
ILMN_2414786	-0.139132
ILMN_1691436	-0.13903
ILMN_2126344	-0.138999
ILMN_1660577	-0.138998
ILMN_1651964	-0.138993
ILMN_1669338	-0.138904
ILMN_1656501	-0.138845
ILMN_2365881	-0.138624
ILMN_2378952	-0.138615
ILMN_1805765	-0.138516
ILMN_1749115	-0.138498
ILMN_1765636	-0.138494
ILMN_1667711	-0.138227
ILMN_1696974	-0.138007
ILMN_1651496	-0.13799
ILMN_1757467	-0.137861
ILMN_1746368	-0.137861
ILMN_2158336	-0.137839
ILMN_2405797	-0.137827
ILMN_1727080	-0.137764
ILMN_1739683	-0.137761
ILMN_1789400	-0.137664
ILMN_1701613	-0.137597
ILMN_1660864	-0.137552
ILMN_1746948	-0.137539
ILMN_1772731	-0.137537
ILMN_2049303	-0.137451
ILMN_1676256	-0.13744
ILMN_1749636	-0.137233
ILMN_1700915	-0.137215
ILMN_1711049	-0.137113
ILMN_2122420	-0.137102
ILMN_2294978	-0.137102
ILMN_1760727	-0.137071
ILMN_1736078	-0.137029
ILMN_1789505	-0.136762
ILMN_1792363	-0.136467
ILMN_1670037	-0.136158
ILMN_1748970	-0.136148
ILMN_1779882	-0.136145
ILMN_1749838	-0.136086
ILMN_1672443	-0.135996
ILMN_1669366	-0.135958
ILMN_1755234	-0.135935
ILMN_1746704	-0.135886
ILMN_1750969	-0.135871
ILMN_2088437	-0.135862
ILMN_1738207	-0.135812
ILMN_1679158	-0.135798
ILMN_1808059	-0.135768
ILMN_2240221	-0.135724
ILMN_1729453	-0.135673
ILMN_1813695	-0.13551
ILMN_1660727	-0.135492
ILMN_1779997	-0.135432
ILMN_1767337	-0.13541
ILMN_1656940	-0.135292
ILMN_1744118	-0.135243
ILMN_2152828	-0.135145
ILMN_1809639	-0.135097
ILMN_2134555	-0.134783
ILMN_2370464	-0.134751
ILMN_1692517	-0.134741
ILMN_1739274	-0.134694
ILMN_1715543	-0.134689
ILMN_1716843	-0.134565
ILMN_2203588	-0.134544
ILMN_1664922	-0.134286
ILMN_1729691	-0.134264
ILMN_1751016	-0.13422
ILMN_1733904	-0.134101
ILMN_1654118	-0.134057
ILMN_1653896	-0.133852
ILMN_2096985	-0.133738
ILMN_2378100	-0.133725
ILMN_1796180	-0.133656
ILMN_1812567	-0.133656
ILMN_1761833	-0.133654
ILMN_2294976	-0.133538
ILMN_1805177	-0.1334
ILMN_1700888	-0.133287
ILMN_2365569	-0.133276
ILMN_1698185	-0.133258
ILMN_1740559	-0.133232
ILMN_1713756	-0.133035
ILMN_2147306	-0.132832
ILMN_1699728	-0.132683
ILMN_1734353	-0.132598
ILMN_1674551	-0.132403
ILMN_1778377	-0.132394
ILMN_1801313	-0.132349
ILMN_1728540	-0.132299
ILMN_2160005	-0.132197
ILMN_1676749	-0.131926
ILMN_1805665	-0.131906
ILMN_1695107	-0.131906
ILMN_2075847	-0.131836
ILMN_1752968	-0.131789
ILMN_1683127	-0.131664
ILMN_1669631	-0.131563
ILMN_1804955	-0.131479
ILMN_1813645	-0.131408
ILMN_2327346	-0.13089
ILMN_1656904	-0.130853
ILMN_1755990	-0.130685
ILMN_1807767	-0.130666
ILMN_1732398	-0.130612
ILMN_1685156	-0.130507
ILMN_2328986	-0.13049
ILMN_1737343	-0.130402
ILMN_1656801	-0.130372
ILMN_1768004	-0.130339
ILMN_1752582	-0.130304
ILMN_1796737	-0.130236
ILMN_2307740	-0.130232
ILMN_1768505	-0.130166
ILMN_1674236	-0.130067
ILMN_1698478	-0.129991
ILMN_1737992	-0.129986
ILMN_1703153	-0.129853
ILMN_1720282	-0.129841
ILMN_1720093	-0.129591
ILMN_1791328	-0.129568
ILMN_2397188	-0.129497
ILMN_1664348	-0.129463
ILMN_2298818	-0.12939
ILMN_1653501	-0.12933
ILMN_2186482	-0.129252
ILMN_1772588	-0.129192
ILMN_1738759	-0.129109
ILMN_1703074	-0.129089
ILMN_1762466	-0.129004
ILMN_1668194	-0.128951
ILMN_1689070	-0.128725
ILMN_1653200	-0.128541
ILMN_1720996	-0.128468
ILMN_1654609	-0.128428
ILMN_1677043	-0.128421
ILMN_1796244	-0.128309
ILMN_1736577	-0.128251
ILMN_1797861	-0.128229
ILMN_1717793	-0.128207
ILMN_1651838	-0.1282
ILMN_1781623	-0.128083
ILMN_1748116	-0.127898
ILMN_1793572	-0.127872
ILMN_1753472	-0.127793
ILMN_1741391	-0.127592
ILMN_2353358	-0.127579
ILMN_2402341	-0.12752
ILMN_1762990	-0.12751
ILMN_1743714	-0.127461
ILMN_1740772	-0.127392
ILMN_1697793	-0.127344
ILMN_1771233	-0.127335
ILMN_1768640	-0.127292
ILMN_1786722	-0.127266
ILMN_1667319	-0.127194
ILMN_2230902	-0.12712
ILMN_1760574	-0.12692
ILMN_2127477	-0.126741
ILMN_1682599	-0.126701
ILMN_1723847	-0.126579
ILMN_1789112	-0.126568
ILMN_2167758	-0.126485
ILMN_1651428	-0.126428
ILMN_1761764	-0.126406
ILMN_1749846	-0.126391
ILMN_1764230	-0.126316
ILMN_2165354	-0.126298
ILMN_1742705	-0.126204
ILMN_1704290	-0.126189
ILMN_1701711	-0.126106
ILMN_1733627	-0.126055
ILMN_1653039	-0.12604
ILMN_2281734	-0.125996
ILMN_1755023	-0.125936
ILMN_1799604	-0.125894
ILMN_1798395	-0.125594
ILMN_1737847	-0.125566
ILMN_1806387	-0.12555
ILMN_2364088	-0.125542
ILMN_1730039	-0.125527
ILMN_1732404	-0.125513
ILMN_1730572	-0.12548
ILMN_1863962	-0.125406
ILMN_1746378	-0.125388
ILMN_1764549	-0.125308
ILMN_1706413	-0.12528
ILMN_1725707	-0.125194
ILMN_1656691	-0.125105
ILMN_2135258	-0.124966
ILMN_2331082	-0.124892
ILMN_1815086	-0.124802
ILMN_2297765	-0.124749
ILMN_1751452	-0.12462
ILMN_1771689	-0.124561
ILMN_1655498	-0.124477
ILMN_1682717	-0.124431
ILMN_2406815	-0.124417
ILMN_1683277	-0.1244
ILMN_1840316	-0.12438
ILMN_2384857	-0.124233
ILMN_1813400	-0.124211
ILMN_1657451	-0.124173
ILMN_1758623	-0.124154
ILMN_1779347	-0.124095
ILMN_1709334	-0.124082
ILMN_1754811	-0.124053
ILMN_2365223	-0.124039
ILMN_1663640	-0.123966
ILMN_1693882	-0.123927
ILMN_1747577	-0.12387
ILMN_1717461	-0.123754
ILMN_2243308	-0.123731
ILMN_2193315	-0.123722
ILMN_1682658	-0.123711
ILMN_1779448	-0.123633
ILMN_2401779	-0.123573
ILMN_1799815	-0.12356
ILMN_1737561	-0.123535
ILMN_1719471	-0.123517
ILMN_1774287	-0.123405
ILMN_1705737	-0.123222
ILMN_1756126	-0.123179
ILMN_1756541	-0.123137
ILMN_1789502	-0.122952
ILMN_2189859	-0.12284
ILMN_1657302	-0.122809
ILMN_1711208	-0.122614
ILMN_2220735	-0.122607
ILMN_1814856	-0.122547
ILMN_2301677	-0.122501
ILMN_2157510	-0.12242
ILMN_1776993	-0.122369
ILMN_1679071	-0.122301
ILMN_2335669	-0.122261
ILMN_2197225	-0.122121
ILMN_1684461	-0.122081
ILMN_1667839	-0.122029
ILMN_1690304	-0.122017
ILMN_1658499	-0.1219
ILMN_2391141	-0.121857
ILMN_1910550	-0.121831
ILMN_1815718	-0.121829
ILMN_1656537	-0.121779
ILMN_1799589	-0.121741
ILMN_1791905	-0.121516
ILMN_1710000	-0.121458
ILMN_1773407	-0.121435
ILMN_1766425	-0.121434
ILMN_1668374	-0.121311
ILMN_1796755	-0.121234
ILMN_1670807	-0.121171
ILMN_2184612	-0.121124
ILMN_1672405	-0.121054
ILMN_1801934	-0.121029
ILMN_1784871	-0.121029
ILMN_2290618	-0.121028
ILMN_2224486	-0.120937
ILMN_1660372	-0.120925
ILMN_1683146	-0.120921
ILMN_2098418	-0.120902
ILMN_2218208	-0.120871
ILMN_1658830	-0.120672
ILMN_2290118	-0.120659
ILMN_1774066	-0.120635
ILMN_1754660	-0.120535
ILMN_2124386	-0.120481
ILMN_2351241	-0.120473
ILMN_1652371	-0.120408
ILMN_2186678	-0.120306
ILMN_1785988	-0.120277
ILMN_1700238	-0.120236
ILMN_1911605	-0.12019
ILMN_1669484	-0.120188
ILMN_1674908	-0.120139
ILMN_1795905	-0.120117
ILMN_1656042	-0.120013
ILMN_1742250	-0.120006
ILMN_1813100	-0.120003
ILMN_1882764	-0.120003
ILMN_1745813	-0.119993
ILMN_1725014	-0.119961
ILMN_1790807	-0.119912
ILMN_1782069	-0.119898
ILMN_1762993	-0.119877
ILMN_1803772	-0.119859
ILMN_1804329	-0.119858
ILMN_2215639	-0.119798
ILMN_1658373	-0.119687
ILMN_1677098	-0.119662
ILMN_1714461	-0.119575
ILMN_2047354	-0.119538
ILMN_1784516	-0.119424
ILMN_1662359	-0.119343
ILMN_1816713	-0.119327
ILMN_1788095	-0.119316
ILMN_1723116	-0.119247
ILMN_1651364	-0.119228
ILMN_1719975	-0.119116
ILMN_1807981	-0.119081
ILMN_1800425	-0.119017
ILMN_2169801	-0.11896
ILMN_1677384	-0.118874
ILMN_1702065	-0.118817
ILMN_1716973	-0.118799
ILMN_1692620	-0.118689
ILMN_1694533	-0.118668
ILMN_1658486	-0.118652
ILMN_1673478	-0.118635
ILMN_1712035	-0.118634
ILMN_1726930	-0.118604
ILMN_1779515	-0.118583
ILMN_1711414	-0.118534
ILMN_2214355	-0.118519
ILMN_1763228	-0.118436
ILMN_1669310	-0.118388
ILMN_2397602	-0.118384
ILMN_1666882	-0.118332
ILMN_1801553	-0.118252
ILMN_2090123	-0.118163
ILMN_1831106	-0.11806
ILMN_1700202	-0.118057
ILMN_1776998	-0.11805
ILMN_2129015	-0.118042
ILMN_1742069	-0.118015
ILMN_1689831	-0.1179
ILMN_1801118	-0.117865
ILMN_1772946	-0.117824
ILMN_1687827	-0.117797
ILMN_1795976	-0.117734
ILMN_1800354	-0.117722
ILMN_1866887	-0.117667
ILMN_1722858	-0.117659
ILMN_1729123	-0.117622
ILMN_1672717	-0.117583
ILMN_1657087	-0.11756
ILMN_1762747	-0.117557
ILMN_1676563	-0.117516
ILMN_1770505	-0.117492
ILMN_1713807	-0.117432
ILMN_2175236	-0.117396
ILMN_1662038	-0.117322
ILMN_2147345	-0.117254
ILMN_1769601	-0.11725
ILMN_1738095	-0.117112
ILMN_1665571	-0.117101
ILMN_1685854	-0.117034
ILMN_2256359	-0.116843
ILMN_1775814	-0.116819
ILMN_1748983	-0.11656
ILMN_1793522	-0.116535
ILMN_1671893	-0.116398
ILMN_1769433	-0.116225
ILMN_2052871	-0.116139
ILMN_1654542	-0.116108
ILMN_1866954	-0.116036
ILMN_2064898	-0.11603
ILMN_1728535	-0.115921
ILMN_2406299	-0.115839
ILMN_1730612	-0.115833
ILMN_1767722	-0.115791
ILMN_1732615	-0.115772
ILMN_1809101	-0.11576
ILMN_2184525	-0.115737
ILMN_1789136	-0.115734
ILMN_2103295	-0.115701
ILMN_1726288	-0.115683
ILMN_1787718	-0.115549
ILMN_1678729	-0.115433
ILMN_2187718	-0.115406
ILMN_1689874	-0.115389
ILMN_1764764	-0.115389
ILMN_1682919	-0.115249
ILMN_1761915	-0.115227
ILMN_1714397	-0.11509
ILMN_1728698	-0.115034
ILMN_1714952	-0.115004
ILMN_1652753	-0.114939
ILMN_2084073	-0.114857
ILMN_2217630	-0.114839
ILMN_1798189	-0.114711
ILMN_1670377	-0.114612
ILMN_1806710	-0.114572
ILMN_1880280	-0.114562
ILMN_1778683	-0.114502
ILMN_2397954	-0.114488
ILMN_1715674	-0.114475
ILMN_2201580	-0.114427
ILMN_1702696	-0.114369
ILMN_1813091	-0.114367
ILMN_2350801	-0.114255
ILMN_2138435	-0.114247
ILMN_1736481	-0.114061
ILMN_1780773	-0.114049
ILMN_1683883	-0.113921
ILMN_2069224	-0.113898
ILMN_1660000	-0.113859
ILMN_1700477	-0.113834
ILMN_1731374	-0.113814
ILMN_1744635	-0.113789
ILMN_1742109	-0.113751
ILMN_2399392	-0.113568
ILMN_2349600	-0.113475
ILMN_1754421	-0.11346
ILMN_2320513	-0.113439
ILMN_1761820	-0.113436
ILMN_1813682	-0.113432
ILMN_1747244	-0.113418
ILMN_1803528	-0.113399
ILMN_1912417	-0.113394
ILMN_1719826	-0.113293
ILMN_1715789	-0.11329
ILMN_1682567	-0.113264
ILMN_2396272	-0.113264
ILMN_1713290	-0.113194
ILMN_2052163	-0.112918
ILMN_1741564	-0.112898
ILMN_2289924	-0.112889
ILMN_1820244	-0.112839
ILMN_2187830	-0.112785
ILMN_1794213	-0.112784
ILMN_1725726	-0.112693
ILMN_1658289	-0.112676
ILMN_1724832	-0.112644
ILMN_2387799	-0.112587
ILMN_1735822	-0.112572
ILMN_1714805	-0.112564
ILMN_2273572	-0.112535
ILMN_1810431	-0.112532
ILMN_2043079	-0.112528
ILMN_1814643	-0.112499
ILMN_1700276	-0.112426
ILMN_1658746	-0.112368
ILMN_1701487	-0.112241
ILMN_1655913	-0.112218
ILMN_1770936	-0.112186
ILMN_1797776	-0.112133
ILMN_1795822	-0.112098
ILMN_1735827	-0.11207
ILMN_2356284	-0.112058
ILMN_1811363	-0.112057
ILMN_1809859	-0.112028
ILMN_1811836	-0.112021
ILMN_1800626	-0.111957
ILMN_1768818	-0.111936
ILMN_1657409	-0.111904
ILMN_2097793	-0.111837
ILMN_1694759	-0.111817
ILMN_1799710	-0.111736
ILMN_2321634	-0.111611
ILMN_1690392	-0.111579
ILMN_1783337	-0.111506
ILMN_2246661	-0.111426
ILMN_1858599	-0.111417
ILMN_1750785	-0.111147
ILMN_1701457	-0.111087
ILMN_1814106	-0.111058
ILMN_1785071	-0.111044
ILMN_1781996	-0.111043
ILMN_1718046	-0.111009
ILMN_2187533	-0.110876
ILMN_2183728	-0.110863
ILMN_1783815	-0.11079
ILMN_2372082	-0.110649
ILMN_1900110	-0.110645
ILMN_1656826	-0.11056
ILMN_1767377	-0.110523
ILMN_1793894	-0.11048
ILMN_1769720	-0.110443
ILMN_1724424	-0.110426
ILMN_1812191	-0.110325
ILMN_1778876	-0.110285
ILMN_1656368	-0.110281
ILMN_2373266	-0.110233
ILMN_1786893	-0.110221
ILMN_2378868	-0.110165
ILMN_1713088	-0.110098
ILMN_2198239	-0.110071
ILMN_2311674	-0.110025
ILMN_2064150	-0.109995
ILMN_2162819	-0.10988
ILMN_1685540	-0.109856
ILMN_1659215	-0.109844
ILMN_1787885	-0.109783
ILMN_1651745	-0.109764
ILMN_1697503	-0.109725
ILMN_1793290	-0.109725
ILMN_2050911	-0.109681
ILMN_2363880	-0.109577
ILMN_2344298	-0.109519
ILMN_2234758	-0.109519
ILMN_1799150	-0.109497
ILMN_1651554	-0.109324
ILMN_1808508	-0.10928
ILMN_1788135	-0.109248
ILMN_2311166	-0.109194
ILMN_1715703	-0.109143
ILMN_1792094	-0.109121
ILMN_2091310	-0.109022
ILMN_1695475	-0.108987
ILMN_1746012	-0.108965
ILMN_2060115	-0.108907
ILMN_2352131	-0.108843
ILMN_1676665	-0.108819
ILMN_1709237	-0.108681
ILMN_1654060	-0.108664
ILMN_1663407	-0.108633
ILMN_2331087	-0.10859
ILMN_1712400	-0.108529
ILMN_1763666	-0.108524
ILMN_1769219	-0.108514
ILMN_1794190	-0.108514
ILMN_1795911	-0.108427
ILMN_1668125	-0.1084
ILMN_1725079	-0.108301
ILMN_1759818	-0.108257
ILMN_1688295	-0.108226
ILMN_1805996	-0.108158
ILMN_1803564	-0.108155
ILMN_1778755	-0.10815
ILMN_1765326	-0.108116
ILMN_2376194	-0.108114
ILMN_1800634	-0.108086
ILMN_1694259	-0.108032
ILMN_1742379	-0.108023
ILMN_1781416	-0.108018
ILMN_1667298	-0.10795
ILMN_1727526	-0.107949
ILMN_1683462	-0.107939
ILMN_1671392	-0.107907
ILMN_1676799	-0.107869
ILMN_1665887	-0.107823
ILMN_1776519	-0.107805
ILMN_1762003	-0.107765
ILMN_1703330	-0.107671
ILMN_1795251	-0.107578
ILMN_1675130	-0.107446
ILMN_2149782	-0.107432
ILMN_1657064	-0.107399
ILMN_2375973	-0.107392
ILMN_1758924	-0.107264
ILMN_1765371	-0.107216
ILMN_1727805	-0.107173
ILMN_1701361	-0.10712
ILMN_1671600	-0.107041
ILMN_2374687	-0.107029
ILMN_1727087	-0.107028
ILMN_1665876	-0.106989
ILMN_1676014	-0.106949
ILMN_1739374	-0.106948
ILMN_1784292	-0.106928
ILMN_1800451	-0.106826
ILMN_1758034	-0.106704
ILMN_1719641	-0.106575
ILMN_1747655	-0.10656
ILMN_1683959	-0.106557
ILMN_1806721	-0.106488
ILMN_1797974	-0.106435
ILMN_2403906	-0.106434
ILMN_2391861	-0.106433
ILMN_1807031	-0.106425
ILMN_2313730	-0.106347
ILMN_1690621	-0.10628
ILMN_1758038	-0.106238
ILMN_1703573	-0.106199
ILMN_1698508	-0.106172
ILMN_1727309	-0.106157
ILMN_2370685	-0.106148
ILMN_1653599	-0.10614
ILMN_2383489	-0.106041
ILMN_2111237	-0.106033
ILMN_1668247	-0.106018
ILMN_1758337	-0.106014
ILMN_1804642	-0.105961
ILMN_2194828	-0.105853
ILMN_1729650	-0.105841
ILMN_1737644	-0.105807
ILMN_1654629	-0.105782
ILMN_1901921	-0.105739
ILMN_2050790	-0.105726
ILMN_2077952	-0.105588
ILMN_2059452	-0.105562
ILMN_1683857	-0.105491
ILMN_1670272	-0.105456
ILMN_1687785	-0.105422
ILMN_1704139	-0.105219
ILMN_1813955	-0.10511
ILMN_1808824	-0.105003
ILMN_1768097	-0.104988
ILMN_1787843	-0.10498
ILMN_1742224	-0.104903
ILMN_2149766	-0.104893
ILMN_1812557	-0.104825
ILMN_1705464	-0.104815
ILMN_2111932	-0.104782
ILMN_1690923	-0.104779
ILMN_2373755	-0.104713
ILMN_1781691	-0.104693
ILMN_1681845	-0.104684
ILMN_1809971	-0.104636
ILMN_1756590	-0.104626
ILMN_1665289	-0.104594
ILMN_2127328	-0.104566
ILMN_2285375	-0.104501
ILMN_1792076	-0.10449
ILMN_1797793	-0.10439
ILMN_1741204	-0.104307
ILMN_1699362	-0.104307
ILMN_1812312	-0.104267
ILMN_1773620	-0.104248
ILMN_1791580	-0.104237
ILMN_1665526	-0.104233
ILMN_2276290	-0.1042
ILMN_1693341	-0.104181
ILMN_1780170	-0.10408
ILMN_1780698	-0.104057
ILMN_1681008	-0.103987
ILMN_1726893	-0.103932
ILMN_1680673	-0.103858
ILMN_1723123	-0.103731
ILMN_2139035	-0.103722
ILMN_1658301	-0.103721
ILMN_1668351	-0.103718
ILMN_1809347	-0.103711
ILMN_1695093	-0.10368
ILMN_2405400	-0.10368
ILMN_2081398	-0.10364
ILMN_1746801	-0.103593
ILMN_1729962	-0.103555
ILMN_1682938	-0.103547
ILMN_1667948	-0.103518
ILMN_1695645	-0.103517
ILMN_1736628	-0.103486
ILMN_1810729	-0.103447
ILMN_1725169	-0.103447
ILMN_2148469	-0.103395
ILMN_2397024	-0.10329
ILMN_1737164	-0.103289
ILMN_1671971	-0.103285
ILMN_1791306	-0.103198
ILMN_1794782	-0.103084
ILMN_1788237	-0.103056
ILMN_1675701	-0.103035
ILMN_1802642	-0.102966
ILMN_1747395	-0.102941
ILMN_1664051	-0.10294
ILMN_1683755	-0.102935
ILMN_1808584	-0.102933
ILMN_1723020	-0.102892
ILMN_1667260	-0.102888
ILMN_1755536	-0.10281
ILMN_1761999	-0.102749
ILMN_1702247	-0.102697
ILMN_1727001	-0.102685
ILMN_2173740	-0.10258
ILMN_1770800	-0.102552
ILMN_1698441	-0.102499
ILMN_2188966	-0.102498
ILMN_1725510	-0.102423
ILMN_1811754	-0.102398
ILMN_2344204	-0.102308
ILMN_1653480	-0.102281
ILMN_1777190	-0.10212
ILMN_1670472	-0.102115
ILMN_1720235	-0.102099
ILMN_2339955	-0.102088
ILMN_1913336	-0.102065
ILMN_1664440	-0.102033
ILMN_1753584	-0.102003
ILMN_1654541	-0.10194
ILMN_1731014	-0.101822
ILMN_1793201	-0.101783
ILMN_1808769	-0.101782
ILMN_1891067	-0.101771
ILMN_1692276	-0.101759
ILMN_2108339	-0.101752
ILMN_1700001	-0.101723
ILMN_1738322	-0.101715
ILMN_1766560	-0.101653
ILMN_2381064	-0.10162
ILMN_1760303	-0.101595
ILMN_1687315	-0.101589
ILMN_1763657	-0.101551
ILMN_1720513	-0.101535
ILMN_1697469	-0.101499
ILMN_1742073	-0.101495
ILMN_1695576	-0.101387
ILMN_1654370	-0.101293
ILMN_1813846	-0.101291
ILMN_1697544	-0.101278
ILMN_1770498	-0.101242
ILMN_1767816	-0.1012
ILMN_2210601	-0.101192
ILMN_2332267	-0.101163
ILMN_1714349	-0.101132
ILMN_1674032	-0.101131
ILMN_1758806	-0.101104
ILMN_2173291	-0.101079
ILMN_2094360	-0.101009
ILMN_1751431	-0.100987
ILMN_1736704	-0.100965
ILMN_1655985	-0.100955
ILMN_1680781	-0.100926
ILMN_1737360	-0.100916
ILMN_1791147	-0.100835
ILMN_1805636	-0.100808
ILMN_1701696	-0.100795
ILMN_1721087	-0.100779
ILMN_1761996	-0.100737
ILMN_1804384	-0.100625
ILMN_1708303	-0.100624
ILMN_1756685	-0.100616
ILMN_2082273	-0.100608
ILMN_1781356	-0.10059
ILMN_2151241	-0.100589
ILMN_1780141	-0.100474
ILMN_1712913	-0.100441
ILMN_1654064	-0.100441
ILMN_2390472	-0.100431
ILMN_2381296	-0.100348
ILMN_2079386	-0.100345
ILMN_1666633	-0.100183
ILMN_1693515	-0.100183
ILMN_1652409	-0.100104
ILMN_1723443	-0.100092
ILMN_1689552	-0.100091
ILMN_1762606	-0.100064
ILMN_1794825	-0.100046
ILMN_1733927	-0.100035
ILMN_1856634	-0.0999939
ILMN_1707943	-0.0999912
ILMN_2354391	-0.0999836
ILMN_1687867	-0.0999658
ILMN_1788540	-0.0999233
ILMN_1704351	-0.0998554
ILMN_1750373	-0.0998378
ILMN_1671427	-0.0998373
ILMN_1796682	-0.0998138
ILMN_1713978	-0.0998127
ILMN_1746819	-0.0998111
ILMN_1687092	-0.0997641
ILMN_2358714	-0.0997591
ILMN_1742881	-0.0997357
ILMN_1764754	-0.0997299
ILMN_2051867	-0.0997287
ILMN_1677636	-0.0997204
ILMN_1689817	-0.0997194
ILMN_1661439	-0.099696
ILMN_2186858	-0.0996894
ILMN_2379240	-0.0996594
ILMN_1656369	-0.0995864
ILMN_1785177	-0.0995742
ILMN_2392189	-0.0995652
ILMN_1780444	-0.099552
ILMN_1724666	-0.0995131
ILMN_1773109	-0.0995004
ILMN_1750674	-0.0994164
ILMN_1685042	-0.0994045
ILMN_1693401	-0.0992727
ILMN_2140700	-0.0992504
ILMN_1758164	-0.0992252
ILMN_1664012	-0.0992225
ILMN_1672776	-0.0991726
ILMN_1745154	-0.0991193
ILMN_1752741	-0.0990698
ILMN_1669177	-0.0990153
ILMN_1669281	-0.0989438
ILMN_1903049	-0.0989424
ILMN_1721106	-0.0989217
ILMN_1778917	-0.0989103
ILMN_1771120	-0.0988613
ILMN_2255382	-0.0987935
ILMN_2376416	-0.0987811
ILMN_1771728	-0.0987779
ILMN_2226304	-0.0987602
ILMN_1682818	-0.098746
ILMN_1740493	-0.098721
ILMN_1801697	-0.0986955
ILMN_1792456	-0.0986409
ILMN_1748323	-0.0986346
ILMN_2395969	-0.0986275
ILMN_1756311	-0.0986225
ILMN_1801664	-0.0985986
ILMN_1802557	-0.0985323
ILMN_2124241	-0.0985066
ILMN_1654385	-0.0984834
ILMN_1755954	-0.0984404
ILMN_1669064	-0.0984216
ILMN_1805853	-0.0984141
ILMN_1675936	-0.0983305
ILMN_1656111	-0.09829
ILMN_1807515	-0.0982809
ILMN_2173294	-0.0981908
ILMN_1733311	-0.0981765
ILMN_2258774	-0.0981697
ILMN_1695110	-0.0981413
ILMN_1725166	-0.0981234
ILMN_1758173	-0.0980792
ILMN_2116127	-0.0979577
ILMN_1743367	-0.0979572
ILMN_1799082	-0.0978532
ILMN_2408430	-0.0978394
ILMN_1744822	-0.0978358
ILMN_1651498	-0.0978273
ILMN_2047599	-0.0978248
ILMN_1655545	-0.0977985
ILMN_1699525	-0.0977961
ILMN_1807211	-0.0977556
ILMN_1711608	-0.0977535
ILMN_1695413	-0.0977398
ILMN_1796734	-0.0976287
ILMN_1797660	-0.0976157
ILMN_1790782	-0.0975781
ILMN_2366177	-0.0975776
ILMN_1732071	-0.0975599
ILMN_1723886	-0.0975356
ILMN_2333440	-0.0975217
ILMN_1764851	-0.0974262
ILMN_1893511	-0.0973554
ILMN_1908989	-0.0972707
ILMN_2153485	-0.0972574
ILMN_1740165	-0.0971861
ILMN_1745887	-0.0971553
ILMN_1728923	-0.0971496
ILMN_1807152	-0.0971258
ILMN_2395974	-0.0970375
ILMN_1789186	-0.0969654
ILMN_1727142	-0.0968903
ILMN_1693717	-0.0968707
ILMN_1711928	-0.0968686
ILMN_1653429	-0.0968067
ILMN_1687782	-0.0967964
ILMN_1681777	-0.0967948
ILMN_1689704	-0.0967885
ILMN_1724668	-0.0967623
ILMN_1683328	-0.0967588
ILMN_1700549	-0.0967504
ILMN_1901532	-0.0966996
ILMN_1736888	-0.0966174
ILMN_1805992	-0.0965541
ILMN_1666258	-0.0965503
ILMN_1843932	-0.0965283
ILMN_1684746	-0.0964418
ILMN_1744713	-0.0964099
ILMN_1746403	-0.0963885
ILMN_2341254	-0.0963803
ILMN_1739770	-0.0963673
ILMN_1716674	-0.0963409
ILMN_1788874	-0.0962085
ILMN_1687519	-0.0961653
ILMN_1685397	-0.0961556
ILMN_1764361	-0.0961213
ILMN_1756928	-0.096106
ILMN_2337336	-0.0960827
ILMN_1882519	-0.096064
ILMN_1790881	-0.0960499
ILMN_1666314	-0.0959983
ILMN_1730888	-0.0959599
ILMN_1690063	-0.0959499
ILMN_1711792	-0.0959078
ILMN_1732885	-0.0958635
ILMN_2224031	-0.0958617
ILMN_2100815	-0.0958057
ILMN_1718303	-0.0957708
ILMN_1675239	-0.09577
ILMN_1814333	-0.095753
ILMN_2341487	-0.0957352
ILMN_1754179	-0.0956624
ILMN_1699243	-0.0956185
ILMN_1652024	-0.0955943
ILMN_2398995	-0.0955939
ILMN_1688997	-0.0955809
ILMN_1831943	-0.0955506
ILMN_2400219	-0.0955143
ILMN_1777170	-0.095494
ILMN_1853631	-0.0954547
ILMN_1708382	-0.095402
ILMN_1685057	-0.0953894
ILMN_1763091	-0.0953481
ILMN_2248589	-0.0953418
ILMN_1688565	-0.0953337
ILMN_1810978	-0.095309
ILMN_1652379	-0.095289
ILMN_1789233	-0.0952879
ILMN_1713679	-0.0952433
ILMN_1736340	-0.0952264
ILMN_1724612	-0.0952081
ILMN_2305407	-0.0951735
ILMN_1662848	-0.0951483
ILMN_1725312	-0.0950929
ILMN_1793934	-0.0950616
ILMN_1691567	-0.0950526
ILMN_2234697	-0.0950474
ILMN_1663037	-0.0950399
ILMN_1797189	-0.0950079
ILMN_1695745	-0.0949368
ILMN_1700109	-0.0948506
ILMN_2231298	-0.0948258
ILMN_1684795	-0.094814
ILMN_2329735	-0.094807
ILMN_1658706	-0.0948053
ILMN_1720287	-0.0947963
ILMN_2179533	-0.0947743
ILMN_1806312	-0.0946945
ILMN_1669928	-0.0946744
ILMN_1694535	-0.0946232
ILMN_1725760	-0.0945458
ILMN_2185884	-0.0945376
ILMN_1702265	-0.0945036
ILMN_2251225	-0.0944548
ILMN_1729495	-0.0943612
ILMN_1721741	-0.0941615
ILMN_1787539	-0.0941531
ILMN_2341595	-0.0941358
ILMN_1764619	-0.0940765
ILMN_1659415	-0.0940641
ILMN_1790859	-0.0940168
ILMN_2284744	-0.0940112
ILMN_2175112	-0.093947
ILMN_1674817	-0.0938896
ILMN_1792508	-0.0938647
ILMN_1730307	-0.0937969
ILMN_1753507	-0.0937772
ILMN_1699852	-0.0937231
ILMN_1782417	-0.0936313
ILMN_1661424	-0.0936089
ILMN_1692826	-0.093583
ILMN_1733603	-0.093546
ILMN_2411794	-0.0934983
ILMN_1774427	-0.0934739
ILMN_1791867	-0.093463
ILMN_1900661	-0.0934493
ILMN_2390227	-0.0934293
ILMN_1835847	-0.0933919
ILMN_1751984	-0.0933832
ILMN_2303669	-0.0933815
ILMN_1788363	-0.0932715
ILMN_1794844	-0.0932458
ILMN_2231911	-0.0931019
ILMN_1712944	-0.0930471
ILMN_1674394	-0.0930432
ILMN_1677951	-0.0930416
ILMN_1763852	-0.0929977
ILMN_1703110	-0.0929839
ILMN_1652407	-0.092978
ILMN_1692219	-0.0929493
ILMN_1678037	-0.0927814
ILMN_1676302	-0.0927048
ILMN_2347068	-0.0926847
ILMN_1806328	-0.0926644
ILMN_1755649	-0.0926358
ILMN_2404539	-0.0926056
ILMN_1702592	-0.0925782
ILMN_1808587	-0.0925296
ILMN_2328835	-0.0924918
ILMN_2074044	-0.0924658
ILMN_1725992	-0.0924409
ILMN_1779423	-0.0924357
ILMN_1809259	-0.0924171
ILMN_2399174	-0.0923775
ILMN_1728742	-0.0923065
ILMN_1709590	-0.0922839
ILMN_1665686	-0.0922362
ILMN_1665601	-0.092213
ILMN_1813131	-0.0921857
ILMN_1697820	-0.0921814
ILMN_1804652	-0.0920635
ILMN_1783675	-0.0920093
ILMN_1759252	-0.0918559
ILMN_1686291	-0.091801
ILMN_1813423	-0.0917117
ILMN_1784641	-0.0915196
ILMN_1810712	-0.0915163
ILMN_1763638	-0.0914699
ILMN_2064655	-0.0914529
ILMN_1738784	-0.0914328
ILMN_1697694	-0.0913843
ILMN_1690487	-0.0913493
ILMN_1875510	-0.0913488
ILMN_1684755	-0.0913401
ILMN_1745623	-0.0913237
ILMN_2220739	-0.0913067
ILMN_1743371	-0.091247
ILMN_1804332	-0.0911972
ILMN_2104967	-0.0911935
ILMN_2224444	-0.0911856
ILMN_1717706	-0.0911805
ILMN_1745112	-0.0911663
ILMN_1677910	-0.0911628
ILMN_1706426	-0.0911549
ILMN_2172755	-0.0911173
ILMN_1661299	-0.0911153
ILMN_1665280	-0.0911071
ILMN_1725043	-0.0910412
ILMN_1673521	-0.0909488
ILMN_2357730	-0.0909463
ILMN_1680239	-0.0909145
ILMN_1806017	-0.0908559
ILMN_1743427	-0.0908455
ILMN_1728898	-0.0908165
ILMN_2386179	-0.0908053
ILMN_2211950	-0.0907563
ILMN_1721167	-0.0906806
ILMN_1694514	-0.0906572
ILMN_1745217	-0.0906485
ILMN_1879326	-0.0905872
ILMN_2219134	-0.0905692
ILMN_1732143	-0.0905386
ILMN_2168347	-0.0905173
ILMN_1720034	-0.0904936
ILMN_1735930	-0.0904794
ILMN_2325574	-0.0904725
ILMN_1765159	-0.0904622
ILMN_2323801	-0.0904462
ILMN_1672135	-0.0904385
ILMN_2374683	-0.0903494
ILMN_1752728	-0.0903374
ILMN_1665909	-0.0903243
ILMN_1730816	-0.0902866
ILMN_1788878	-0.0902422
ILMN_1776967	-0.090215
ILMN_2075800	-0.0901646
ILMN_1726239	-0.0901518
ILMN_1685289	-0.0901446
ILMN_1778803	-0.0901431
ILMN_1733680	-0.0901148
ILMN_2104784	-0.0900746
ILMN_1814402	-0.0900678
ILMN_1683905	-0.0900495
ILMN_2364674	-0.0900464
ILMN_1782045	-0.0900384
ILMN_1692844	-0.0899769
ILMN_1721968	-0.0899646
ILMN_2266948	-0.0899211
ILMN_1807455	-0.0898803
ILMN_1792689	-0.0898534
ILMN_1692107	-0.0897824
ILMN_2231299	-0.0897193
ILMN_1695092	-0.0896867
ILMN_2307450	-0.0896399
ILMN_1813746	-0.0896377
ILMN_1691131	-0.0896097
ILMN_1882311	-0.0896095
ILMN_2074773	-0.0895297
ILMN_2274923	-0.0895264
ILMN_1717855	-0.0895029
ILMN_1843081	-0.0895012
ILMN_1695917	-0.0894849
ILMN_2142353	-0.0894504
ILMN_1806149	-0.0894038
ILMN_1696466	-0.0893922
ILMN_1740685	-0.0893763
ILMN_1803094	-0.0892853
ILMN_2375830	-0.0892599
ILMN_1728581	-0.0892381
ILMN_1813456	-0.0891651
ILMN_1781388	-0.0891528
ILMN_2095506	-0.0891486
ILMN_1662328	-0.0891222
ILMN_1658333	-0.0891186
ILMN_1661466	-0.0890735
ILMN_1794492	-0.0890382
ILMN_1761566	-0.0890164
ILMN_2111918	-0.0890006
ILMN_1713162	-0.0889869
ILMN_1679401	-0.0889671
ILMN_1797828	-0.088938
ILMN_2200917	-0.0889312
ILMN_1728230	-0.0889261
ILMN_1677607	-0.0889239
ILMN_1760087	-0.0889081
ILMN_1753440	-0.0888966
ILMN_2225537	-0.0888577
ILMN_1699674	-0.088851
ILMN_1696099	-0.0888294
ILMN_1718961	-0.0888281
ILMN_1651949	-0.0888262
ILMN_1767612	-0.0888135
ILMN_1789567	-0.0888089
ILMN_1769382	-0.088786
ILMN_1814557	-0.0886597
ILMN_1672843	-0.0885187
ILMN_1777487	-0.0885079
ILMN_1789909	-0.0884935
ILMN_1804854	-0.0884917
ILMN_2327795	-0.0884699
ILMN_1749410	-0.0883812
ILMN_1787923	-0.0883558
ILMN_1658917	-0.0883477
ILMN_1710863	-0.0882968
ILMN_1696757	-0.0882939
ILMN_1795697	-0.0882853
ILMN_1790761	-0.088282
ILMN_1742025	-0.0881614
ILMN_2412922	-0.088154
ILMN_1915188	-0.0880996
ILMN_1784523	-0.0880985
ILMN_1796629	-0.0880867
ILMN_2047112	-0.0880866
ILMN_1668876	-0.088056
ILMN_1748093	-0.0880477
ILMN_1741005	-0.0880077
ILMN_1819608	-0.0880071
ILMN_1684956	-0.0880061
ILMN_1654851	-0.087995
ILMN_1679641	-0.0879892
ILMN_1788421	-0.087943
ILMN_1813175	-0.0879037
ILMN_1785095	-0.0879007
ILMN_1744211	-0.0878268
ILMN_1676659	-0.0876913
ILMN_2310253	-0.0876129
ILMN_1791280	-0.087594
ILMN_1770412	-0.087578
ILMN_1738402	-0.0875416
ILMN_2346727	-0.0875033
ILMN_1779171	-0.0874964
ILMN_1659029	-0.0874892
ILMN_1702279	-0.0874615
ILMN_1847334	-0.0874404
ILMN_1850238	-0.0874274
ILMN_2395204	-0.0874033
ILMN_1768050	-0.0873588
ILMN_1688702	-0.0873454
ILMN_1678423	-0.0872429
ILMN_1751099	-0.0872405
ILMN_2343310	-0.0872148
ILMN_1706531	-0.0872053
ILMN_1736180	-0.0871816
ILMN_1758750	-0.0871213
ILMN_2164081	-0.0871152
ILMN_2042595	-0.0871034
ILMN_1773312	-0.0870358
ILMN_1722898	-0.0870306
ILMN_1745152	-0.0870256
ILMN_1707783	-0.0870215
ILMN_1679322	-0.0869679
ILMN_1880406	-0.0869618
ILMN_1778144	-0.0869419
ILMN_1693259	-0.08694
ILMN_1729281	-0.0868847
ILMN_1772486	-0.0868817
ILMN_1768773	-0.0868615
ILMN_1665123	-0.0868584
ILMN_1779014	-0.0868418
ILMN_1701052	-0.0868411
ILMN_2216918	-0.0867888
ILMN_2373377	-0.0867559
ILMN_1678805	-0.0867105
ILMN_1664030	-0.0866792
ILMN_1713369	-0.0866781
ILMN_2333766	-0.0866234
ILMN_1662174	-0.086615
ILMN_1748616	-0.0866126
ILMN_1728517	-0.0865744
ILMN_1769575	-0.0865691
ILMN_1746031	-0.086551
ILMN_1773006	-0.0865028
ILMN_1733581	-0.0864993
ILMN_1802380	-0.0864959
ILMN_1768925	-0.0864474
ILMN_2141118	-0.0864347
ILMN_1809577	-0.0864135
ILMN_1718093	-0.0864031
ILMN_1813851	-0.0863814
ILMN_1747020	-0.0863581
ILMN_1727332	-0.0863117
ILMN_1695853	-0.086308
ILMN_2339202	-0.0862982
ILMN_1763891	-0.0862609
ILMN_1676897	-0.0862578
ILMN_1677439	-0.0862181
ILMN_1782753	-0.0861883
ILMN_1706118	-0.0861704
ILMN_1794803	-0.0861589
ILMN_1663042	-0.0861207
ILMN_1796146	-0.0861041
ILMN_1705984	-0.0860921
ILMN_1768202	-0.0860673
ILMN_2400583	-0.0860637
ILMN_1766762	-0.0860501
ILMN_1724825	-0.0859194
ILMN_1690443	-0.0858713
ILMN_2152429	-0.0858349
ILMN_1704531	-0.085834
ILMN_1671281	-0.0858323
ILMN_1698766	-0.0857965
ILMN_1663592	-0.0857782
ILMN_1839750	-0.0857454
ILMN_1742330	-0.0857318
ILMN_1689786	-0.0856891
ILMN_1673305	-0.0856675
ILMN_2201533	-0.0856245
ILMN_1761450	-0.0856029
ILMN_1714216	-0.0855915
ILMN_1686227	-0.0855898
ILMN_1789266	-0.0855844
ILMN_1789639	-0.0855838
ILMN_1659857	-0.0855582
ILMN_1805271	-0.0855508
ILMN_2189936	-0.085527
ILMN_1757085	-0.0855191
ILMN_2401641	-0.08551
ILMN_2210482	-0.085463
ILMN_1724480	-0.08542
ILMN_2159453	-0.0853595
ILMN_2142185	-0.0852819
ILMN_2230035	-0.0852362
ILMN_1769633	-0.0852256
ILMN_2379375	-0.08522
ILMN_1874323	-0.0851984
ILMN_2351795	-0.0851547
ILMN_1756358	-0.0851217
ILMN_1801105	-0.0851076
ILMN_1795906	-0.0850955
ILMN_2113535	-0.0850856
ILMN_1726755	-0.0850708
ILMN_1671800	-0.0850586
ILMN_1683234	-0.0850309
ILMN_1755504	-0.0850247
ILMN_1697153	-0.0849962
ILMN_1869087	-0.084993
ILMN_1722953	-0.0849247
ILMN_1686804	-0.0849056
ILMN_1762666	-0.0848344
ILMN_2394296	-0.0848313
ILMN_1772876	-0.0848102
ILMN_1749641	-0.0848032
ILMN_2339266	-0.0847919
ILMN_1656621	-0.0847607
ILMN_1792110	-0.0847104
ILMN_1686645	-0.0846695
ILMN_1773741	-0.0846662
ILMN_1727444	-0.0845943
ILMN_1800465	-0.0845742
ILMN_1789879	-0.084547
ILMN_1794187	-0.0844346
ILMN_1685834	-0.0843776
ILMN_2337941	-0.0843164
ILMN_1724306	-0.0842834
ILMN_1678652	-0.0842707
ILMN_1705861	-0.0842636
ILMN_1746135	-0.0842348
ILMN_2102670	-0.0842299
ILMN_1784753	-0.0842248
ILMN_1773200	-0.0842145
ILMN_1770676	-0.0841896
ILMN_1666096	-0.0841861
ILMN_1683065	-0.0841024
ILMN_1716468	-0.0840872
ILMN_1739297	-0.0840762
ILMN_1694491	-0.084014
ILMN_1691143	-0.0839459
ILMN_1802631	-0.0839296
ILMN_1669523	-0.0839185
ILMN_1702235	-0.083879
ILMN_1753498	-0.0838646
ILMN_1873278	-0.0838232
ILMN_2246510	-0.0838189
ILMN_1761301	-0.0838156
ILMN_1710523	-0.0838138
ILMN_1776153	-0.083787
ILMN_1725906	-0.0837809
ILMN_2341548	-0.0837401
ILMN_1689868	-0.0837236
ILMN_1750324	-0.0837194
ILMN_1759008	-0.083712
ILMN_2058512	-0.0837059
ILMN_2124361	-0.0836024
ILMN_1661802	-0.0835937
ILMN_1754149	-0.083582
ILMN_1678546	-0.0835556
ILMN_2377496	-0.0835158
ILMN_1738346	-0.0835092
ILMN_1705922	-0.0835071
ILMN_1666109	-0.0834985
ILMN_1783120	-0.083455
ILMN_1805603	-0.0834369
ILMN_1680109	-0.0834347
ILMN_2085722	-0.0833568
ILMN_1715823	-0.0833494
ILMN_1760294	-0.0833352
ILMN_1784206	-0.0833103
ILMN_1730799	-0.083259
ILMN_1699676	-0.0832253
ILMN_1667162	-0.083208
ILMN_1696701	-0.0831055
ILMN_1687824	-0.0830986
ILMN_1738383	-0.0830977
ILMN_2189458	-0.0830655
ILMN_1693004	-0.083049
ILMN_1721842	-0.0830345
ILMN_1688022	-0.0830315
ILMN_1729058	-0.0830068
ILMN_1661994	-0.0829988
ILMN_1657744	-0.0829785
ILMN_2062381	-0.0829424
ILMN_1788607	-0.0829339
ILMN_1815519	-0.0828941
ILMN_1654112	-0.0828674
ILMN_2394381	-0.0828648
ILMN_1668179	-0.0828557
ILMN_2400292	-0.082855
ILMN_1741613	-0.0828512
ILMN_1739805	-0.082812
ILMN_1725417	-0.0827583
ILMN_1687279	-0.0827138
ILMN_1708482	-0.0825449
ILMN_1704154	-0.0825363
ILMN_1717909	-0.0824501
ILMN_1664398	-0.0824472
ILMN_1765001	-0.0823737
ILMN_1681890	-0.0823734
ILMN_1673024	-0.082319
ILMN_1766405	-0.0823041
ILMN_1764861	-0.0822807
ILMN_1806293	-0.0822435
ILMN_1741148	-0.0822364
ILMN_1884750	-0.0821938
ILMN_1684352	-0.0821875
ILMN_1693293	-0.0821718
ILMN_1782861	-0.0821704
ILMN_1671265	-0.0821546
ILMN_1741597	-0.0820786
ILMN_1746604	-0.0819616
ILMN_1684289	-0.0819603
ILMN_1743131	-0.0818555
ILMN_1801366	-0.0817627
ILMN_1651315	-0.0817444
ILMN_2387105	-0.0817206
ILMN_1701386	-0.0816914
ILMN_1682864	-0.0816675
ILMN_1797155	-0.0816602
ILMN_1894388	-0.0816469
ILMN_1757837	-0.0816377
ILMN_1666384	-0.0816158
ILMN_1663816	-0.0815739
ILMN_1701832	-0.0815733
ILMN_1735495	-0.0815434
ILMN_1814464	-0.0814642
ILMN_1684205	-0.0814236
ILMN_2162358	-0.0813884
ILMN_1811264	-0.0813781
ILMN_1732060	-0.0813601
ILMN_1659727	-0.0813404
ILMN_2333107	-0.0812956
ILMN_1678004	-0.0812938
ILMN_1763842	-0.0812777
ILMN_1668134	-0.0812765
ILMN_1717326	-0.0812676
ILMN_1713491	-0.0812295
ILMN_2367172	-0.0811814
ILMN_1769911	-0.0811473
ILMN_1813775	-0.0811171
ILMN_1779735	-0.0810934
ILMN_2351638	-0.0810602
ILMN_1766951	-0.0810392
ILMN_1684726	-0.0810295
ILMN_1654692	-0.0810076
ILMN_1724897	-0.0809894
ILMN_1805614	-0.0809766
ILMN_1652649	-0.080971
ILMN_1682738	-0.08097
ILMN_2359306	-0.0809513
ILMN_1716089	-0.0809288
ILMN_1672589	-0.0809266
ILMN_1768399	-0.0808867
ILMN_2196328	-0.0807988
ILMN_2395856	-0.0807608
ILMN_1726729	-0.0807594
ILMN_1781638	-0.0807444
ILMN_1695706	-0.0807196
ILMN_1778347	-0.0806864
ILMN_2374076	-0.0806181
ILMN_1658351	-0.0805639
ILMN_1794157	-0.0804833
ILMN_1731206	-0.0804724
ILMN_1753515	-0.0804057
ILMN_1669966	-0.0803989
ILMN_1680353	-0.0802955
ILMN_1782743	-0.0802819
ILMN_1745343	-0.0802621
ILMN_1767805	-0.0802612
ILMN_2323385	-0.0802517
ILMN_1748827	-0.0802407
ILMN_2380938	-0.0802004
[truncated: 46,804 more rows]

## Sheet: CM1.Normal-like
Probe_ID	CM1 score		Graphs																	Top CM1 score, negative	Probe_ID	Top CM1 score, positive
ILMN_1655915	-0.166231																			-0.166231	ILMN_1655915
ILMN_1687235	-0.157279																			-0.157279	ILMN_1687235
ILMN_1789507	-0.155214																			-0.155214	ILMN_1789507
ILMN_2358760	-0.151687																			-0.151687	ILMN_2358760
ILMN_1711470	-0.145009																			-0.145009	ILMN_1711470
ILMN_1809590	-0.140538																			-0.140538	ILMN_1809590
ILMN_1678535	-0.14031																			-0.14031	ILMN_1678535
ILMN_1654151	-0.137484																			-0.137484	ILMN_1654151
ILMN_2217601	-0.137314																			-0.137314	ILMN_2217601
ILMN_1726108	-0.135271																			-0.135271	ILMN_1726108
ILMN_1701918	-0.134929																			-0.134929	ILMN_1701918
ILMN_1664516	-0.134054																			-0.134054	ILMN_1664516
ILMN_2387471	-0.129806																			-0.129806	ILMN_2387471
ILMN_1751444	-0.129662																			-0.129662	ILMN_1751444
ILMN_1729533	-0.12955																			-0.12955	ILMN_1729533
ILMN_1815184	-0.129089																			-0.129089	ILMN_1815184
ILMN_2329569	-0.128662																			-0.128662	ILMN_2329569
ILMN_1728934	-0.128516																			-0.128516	ILMN_1728934
ILMN_2143566	-0.128347																			-0.128347	ILMN_2143566
ILMN_1755721	-0.12776																			-0.12776	ILMN_1755721
ILMN_2051373	-0.127534																			-0.127534	ILMN_2051373
ILMN_1711124	-0.127324																			-0.127324	ILMN_1711124
ILMN_1686097	-0.127148																			-0.127148	ILMN_1686097
ILMN_1688071	-0.127046																			-0.127046	ILMN_1688071
ILMN_1835913	-0.124963																			-0.124963	ILMN_1835913
ILMN_1801313	-0.124683																				ILMN_1665035	0.193632
ILMN_1673673	-0.124515																				ILMN_2075603	0.196045
ILMN_2405470	-0.124387																				ILMN_1709486	0.196695
ILMN_1712803	-0.123884																				ILMN_1655611	0.197155
ILMN_2392803	-0.123097																				ILMN_1796801	0.197167
ILMN_1782045	-0.122822																				ILMN_1751607	0.200657
ILMN_2400500	-0.122627																				ILMN_2367883	0.201401
ILMN_1756705	-0.122406																				ILMN_1809291	0.203673
ILMN_1786065	-0.12219																				ILMN_1677092	0.204069
ILMN_1695658	-0.120727																				ILMN_1660086	0.207282
ILMN_1768772	-0.120713																				ILMN_2105441	0.207289
ILMN_1723709	-0.120612																				ILMN_2120695	0.20821
ILMN_2143155	-0.120083																				ILMN_2076600	0.210945
ILMN_1726743	-0.119598																				ILMN_2197128	0.211552
ILMN_1826165	-0.118345																				ILMN_1764309	0.21341
ILMN_2285996	-0.11816																				ILMN_1766914	0.213582
ILMN_2072296	-0.117238																				ILMN_1676822	0.213856
ILMN_1714730	-0.117012																				ILMN_1658356	0.218605
ILMN_2412384	-0.116755																				ILMN_1664464	0.232274
ILMN_1730777	-0.11667																				ILMN_1810978	0.23238
ILMN_1780667	-0.116647																				ILMN_2149164	0.244059
ILMN_1808824	-0.115642																				ILMN_1651282	0.244094
ILMN_2398995	-0.114867																				ILMN_1740609	0.251829
ILMN_2077550	-0.114567																				ILMN_1723684	0.255488
ILMN_2096322	-0.114252																				ILMN_1809099	0.274505
ILMN_1754051	-0.113841
ILMN_1808769	-0.113409
ILMN_1695576	-0.112982
ILMN_1728787	-0.112767
ILMN_1717173	-0.112617
ILMN_2409220	-0.112387
ILMN_1790317	-0.112154
ILMN_1712636	-0.111926
ILMN_1683120	-0.111569
ILMN_2125763	-0.111373
ILMN_2362549	-0.110446
ILMN_2367743	-0.110293
ILMN_1779711	-0.110283
ILMN_2301083	-0.109865
ILMN_2402930	-0.109668
ILMN_1794539	-0.109581
ILMN_1683576	-0.109563
ILMN_1766658	-0.109421
ILMN_1764321	-0.109208
ILMN_1888359	-0.109113
ILMN_1681503	-0.109081
ILMN_1690484	-0.108347
ILMN_1747016	-0.108237
ILMN_1793360	-0.108074
ILMN_1673721	-0.108022
ILMN_1706413	-0.107952
ILMN_2406656	-0.107761
ILMN_1735822	-0.107717
ILMN_1683450	-0.107652
ILMN_1722489	-0.107334
ILMN_1723092	-0.107283
ILMN_1796949	-0.10714
ILMN_2330861	-0.107007
ILMN_1716925	-0.107001
ILMN_2222008	-0.10677
ILMN_1723123	-0.106753
ILMN_1789123	-0.106664
ILMN_1790461	-0.106417
ILMN_1656452	-0.105936
ILMN_1759772	-0.105883
ILMN_1727080	-0.105878
ILMN_2212909	-0.105651
ILMN_1699015	-0.105643
ILMN_1652017	-0.105616
ILMN_2047354	-0.105592
ILMN_2151488	-0.105585
ILMN_1680925	-0.105487
ILMN_1726720	-0.105026
ILMN_1738093	-0.104987
ILMN_1748093	-0.104986
ILMN_2106331	-0.104944
ILMN_1781680	-0.10486
ILMN_1859946	-0.104654
ILMN_1735093	-0.104648
ILMN_2129563	-0.104583
ILMN_1656082	-0.104397
ILMN_1781374	-0.104377
ILMN_2349459	-0.104302
ILMN_2052373	-0.104288
ILMN_1686871	-0.104232
ILMN_2043079	-0.104189
ILMN_1774066	-0.104142
ILMN_1729509	-0.103947
ILMN_1820244	-0.103699
ILMN_1705861	-0.103651
ILMN_1743747	-0.103558
ILMN_1806037	-0.103518
ILMN_1801664	-0.103157
ILMN_2194828	-0.102909
ILMN_2041222	-0.102636
ILMN_1658499	-0.102623
ILMN_2143685	-0.102522
ILMN_1791826	-0.102447
ILMN_1740571	-0.102401
ILMN_2212878	-0.102337
ILMN_1718771	-0.102305
ILMN_1809208	-0.102298
ILMN_1671207	-0.102104
ILMN_2348090	-0.101845
ILMN_1708402	-0.101812
ILMN_1809566	-0.101637
ILMN_1700337	-0.101465
ILMN_1750130	-0.101152
ILMN_2334359	-0.101079
ILMN_1669052	-0.101052
ILMN_1790537	-0.101028
ILMN_1712719	-0.100933
ILMN_2412139	-0.100927
ILMN_1799667	-0.100822
ILMN_2405680	-0.100731
ILMN_1749738	-0.10067
ILMN_2048700	-0.100518
ILMN_1773119	-0.100424
ILMN_1709257	-0.1004
ILMN_1799150	-0.100248
ILMN_1684217	-0.100201
ILMN_1700811	-0.100146
ILMN_1784985	-0.0999275
ILMN_1695731	-0.0997268
ILMN_1783287	-0.0997001
ILMN_1750394	-0.0995735
ILMN_2412860	-0.099539
ILMN_1781942	-0.0995358
ILMN_1687867	-0.0995039
ILMN_1677968	-0.0994688
ILMN_1748427	-0.0993683
ILMN_1685928	-0.0991091
ILMN_1676191	-0.0990708
ILMN_1686748	-0.0989343
ILMN_2368718	-0.0987546
ILMN_1739645	-0.098601
ILMN_1671971	-0.098366
ILMN_1728471	-0.0983152
ILMN_1755354	-0.0982044
ILMN_1706301	-0.0981638
ILMN_2049303	-0.0981209
ILMN_1666305	-0.0980696
ILMN_1670238	-0.0979908
ILMN_1735762	-0.0978601
ILMN_2391522	-0.0977663
ILMN_1756326	-0.09774
ILMN_2191192	-0.09771
ILMN_1773760	-0.0975327
ILMN_1724832	-0.0974832
ILMN_1801697	-0.0973861
ILMN_1672776	-0.0973333
ILMN_1669781	-0.0973071
ILMN_1722738	-0.0972484
ILMN_2216815	-0.0972083
ILMN_1788166	-0.0971264
ILMN_2202948	-0.0969434
ILMN_1810915	-0.0968902
ILMN_1725678	-0.0967738
ILMN_1801939	-0.0967721
ILMN_1718619	-0.0966782
ILMN_1753584	-0.0966735
ILMN_1761010	-0.0966027
ILMN_1655610	-0.0965985
ILMN_1790202	-0.0965544
ILMN_1694778	-0.0965282
ILMN_1746801	-0.0965248
ILMN_1660864	-0.0964343
ILMN_1712705	-0.0963783
ILMN_1747911	-0.0963288
ILMN_1758750	-0.0962847
ILMN_1751776	-0.0962617
ILMN_1698185	-0.0961643
ILMN_2066756	-0.0961628
ILMN_1751338	-0.0960427
ILMN_1687998	-0.0960196
ILMN_1772207	-0.0958249
ILMN_1713803	-0.0957672
ILMN_1711894	-0.0957085
ILMN_1753196	-0.0956203
ILMN_1790350	-0.0956096
ILMN_1765636	-0.0955589
ILMN_1695414	-0.0955432
ILMN_1811472	-0.0954768
ILMN_2179726	-0.0953656
ILMN_1743055	-0.0952191
ILMN_2337263	-0.0952072
ILMN_1785711	-0.0949972
ILMN_1770505	-0.0949423
ILMN_1709294	-0.0949083
ILMN_2130525	-0.0948797
ILMN_1766650	-0.0948738
ILMN_1728496	-0.0948579
ILMN_1694126	-0.0944994
ILMN_1782897	-0.0944404
ILMN_2392546	-0.0942805
ILMN_1706553	-0.0941947
ILMN_2359014	-0.0940891
ILMN_1691237	-0.0940876
ILMN_1761540	-0.0938966
ILMN_2409298	-0.0938609
ILMN_1664922	-0.0936059
ILMN_1796589	-0.0934831
ILMN_1765770	-0.0934066
ILMN_1803691	-0.0933981
ILMN_1731184	-0.0933205
ILMN_1690442	-0.0930951
ILMN_1673820	-0.0929437
ILMN_1801658	-0.0929355
ILMN_1732516	-0.0929249
ILMN_1800530	-0.0929046
ILMN_1749829	-0.0928635
ILMN_1728972	-0.0928163
ILMN_1701413	-0.0927839
ILMN_1703906	-0.0926916
ILMN_1727540	-0.0925941
ILMN_1723117	-0.0924707
ILMN_1800220	-0.0924636
ILMN_1798210	-0.0924354
ILMN_1737205	-0.0923119
ILMN_1763884	-0.0922645
ILMN_2195482	-0.0919505
ILMN_1762561	-0.0919439
ILMN_1768751	-0.0918297
ILMN_1688322	-0.0917204
ILMN_1880983	-0.0917075
ILMN_1684690	-0.0916933
ILMN_1806502	-0.0916434
ILMN_2413650	-0.0916354
ILMN_1728914	-0.0916171
ILMN_1803593	-0.0916149
ILMN_1800739	-0.0916138
ILMN_1685916	-0.091559
ILMN_1664283	-0.091532
ILMN_2054121	-0.0915261
ILMN_1725183	-0.0914511
ILMN_1753139	-0.0914489
ILMN_1801118	-0.0914224
ILMN_1747078	-0.0911786
ILMN_1713088	-0.091066
ILMN_1685709	-0.0909213
ILMN_1771593	-0.0908985
ILMN_1803219	-0.0908008
ILMN_1741406	-0.0907713
ILMN_1662483	-0.0906201
ILMN_1727618	-0.0904275
ILMN_2328986	-0.0904257
ILMN_1793201	-0.0904223
ILMN_1791905	-0.0902915
ILMN_1777564	-0.0902697
ILMN_2311020	-0.0902564
ILMN_1690170	-0.0899988
ILMN_1695397	-0.0899777
ILMN_1751346	-0.0898245
ILMN_1803073	-0.0897962
ILMN_2095704	-0.0897324
ILMN_1813817	-0.0897129
ILMN_1759766	-0.0895076
ILMN_1784783	-0.0894553
ILMN_1700831	-0.0894384
ILMN_1796663	-0.0894096
ILMN_1662334	-0.0893796
ILMN_1758523	-0.0893648
ILMN_1712583	-0.0893323
ILMN_1651343	-0.0892856
ILMN_1686516	-0.0892081
ILMN_1814557	-0.0891022
ILMN_1810901	-0.0890238
ILMN_1740291	-0.0889352
ILMN_1670807	-0.088817
ILMN_1718354	-0.0888013
ILMN_2045911	-0.0887789
ILMN_1662470	-0.0887243
ILMN_1723035	-0.0886441
ILMN_1767722	-0.0886334
ILMN_1653129	-0.0883917
ILMN_1651828	-0.0883847
ILMN_1756669	-0.0882507
ILMN_1759495	-0.0881569
ILMN_1779517	-0.0881458
ILMN_1676555	-0.08811
ILMN_1725260	-0.0879245
ILMN_1799589	-0.0879222
ILMN_1735908	-0.0878199
ILMN_2060145	-0.0878086
ILMN_1791095	-0.0877275
ILMN_1705849	-0.0877073
ILMN_1788135	-0.0876942
ILMN_1651964	-0.0876835
ILMN_1668814	-0.087522
ILMN_1691884	-0.087465
ILMN_1811729	-0.0874404
ILMN_1656934	-0.0874391
ILMN_1710954	-0.0874068
ILMN_1657682	-0.0874035
ILMN_1750674	-0.0874
ILMN_1686841	-0.0873921
ILMN_1660343	-0.0873452
ILMN_2281786	-0.0873137
ILMN_1784678	-0.0872852
ILMN_2134555	-0.087239
ILMN_2074044	-0.087182
ILMN_1753766	-0.0871021
ILMN_1799860	-0.0869916
ILMN_1668351	-0.0869852
ILMN_2140559	-0.0869674
ILMN_1750969	-0.0868987
ILMN_1659610	-0.0868343
ILMN_1677292	-0.0868219
ILMN_1769634	-0.0866686
ILMN_1707137	-0.0866437
ILMN_2269256	-0.0865269
ILMN_1810514	-0.0865161
ILMN_1801257	-0.0863617
ILMN_2196984	-0.0863033
ILMN_2411116	-0.0862465
ILMN_1716279	-0.0862336
ILMN_1805474	-0.0861823
ILMN_1749180	-0.086171
ILMN_1724811	-0.0860986
ILMN_2358041	-0.0859538
ILMN_1863962	-0.0859454
ILMN_1787280	-0.0859452
ILMN_1775235	-0.0859325
ILMN_2185339	-0.0859131
ILMN_1897310	-0.0859095
ILMN_1680955	-0.0859077
ILMN_1766425	-0.0858182
ILMN_1901921	-0.0856525
ILMN_2049021	-0.0855342
ILMN_1665384	-0.0855235
ILMN_2344971	-0.0854691
ILMN_1656826	-0.0854546
ILMN_1801476	-0.0853874
ILMN_1737631	-0.0853459
ILMN_2145396	-0.085336
ILMN_1808071	-0.0853198
ILMN_1684571	-0.0851707
ILMN_1661778	-0.0851577
ILMN_1687037	-0.0851409
ILMN_1808783	-0.0851133
ILMN_2137208	-0.0850778
ILMN_1767662	-0.0850762
ILMN_1907042	-0.0850405
ILMN_2089875	-0.0850083
ILMN_1695334	-0.0850031
ILMN_1709132	-0.0848871
ILMN_2413898	-0.084873
ILMN_2246661	-0.0848076
ILMN_1676075	-0.0847372
ILMN_1812262	-0.0846111
ILMN_1737728	-0.0845848
ILMN_1777528	-0.0845112
ILMN_2409793	-0.0844814
ILMN_2371053	-0.0843736
ILMN_1711904	-0.0843511
ILMN_1693410	-0.0843309
ILMN_2349129	-0.0841986
ILMN_1746171	-0.0840355
ILMN_2406084	-0.0840093
ILMN_1704452	-0.0839582
ILMN_2050246	-0.0839359
ILMN_2214355	-0.083903
ILMN_1749297	-0.0838992
ILMN_1667670	-0.0838627
ILMN_1663035	-0.0838099
ILMN_1666109	-0.0837338
ILMN_2285375	-0.0836874
ILMN_1676990	-0.0836861
ILMN_1671843	-0.083676
ILMN_2334989	-0.0836624
ILMN_1658301	-0.0836405
ILMN_1685978	-0.0835969
ILMN_1776993	-0.0835763
ILMN_1800935	-0.0835614
ILMN_1664630	-0.083552
ILMN_1781943	-0.0834615
ILMN_1692276	-0.0834404
ILMN_1755677	-0.0833536
ILMN_1811014	-0.0833382
ILMN_1798108	-0.0832936
ILMN_1797566	-0.0832033
ILMN_1708416	-0.0831702
ILMN_1699859	-0.0831193
ILMN_1775677	-0.0829564
ILMN_2195665	-0.0829021
ILMN_1741133	-0.0828317
ILMN_1780700	-0.0827536
ILMN_1718046	-0.0827526
ILMN_1801348	-0.0826668
ILMN_1722726	-0.08264
ILMN_1789349	-0.0826082
ILMN_1725906	-0.0825874
ILMN_1653822	-0.0825854
ILMN_1748770	-0.0825458
ILMN_1772731	-0.08252
ILMN_1738207	-0.0824266
ILMN_1688772	-0.0823156
ILMN_1746241	-0.0821836
ILMN_1668619	-0.0820747
ILMN_1894057	-0.082073
ILMN_1783712	-0.082043
ILMN_2407619	-0.0819439
ILMN_1668507	-0.0819268
ILMN_1776490	-0.0819056
ILMN_1655720	-0.0818956
ILMN_2081883	-0.0818955
ILMN_1669881	-0.0816768
ILMN_1803673	-0.0816448
ILMN_1784467	-0.0815391
ILMN_1729237	-0.081469
ILMN_1808591	-0.0814172
ILMN_2164081	-0.0814129
ILMN_1785570	-0.0814089
ILMN_1694177	-0.081356
ILMN_1671766	-0.0812756
ILMN_1734814	-0.0812404
ILMN_1751328	-0.081184
ILMN_1711171	-0.0811793
ILMN_1773780	-0.0811722
ILMN_1786125	-0.0811315
ILMN_1874575	-0.0810355
ILMN_1788099	-0.0810231
ILMN_1811121	-0.0810089
ILMN_2161330	-0.0809715
ILMN_2042771	-0.0808024
ILMN_2111932	-0.0807798
ILMN_2194649	-0.0807411
ILMN_1686082	-0.0806618
ILMN_1728048	-0.0805632
ILMN_1688154	-0.0805214
ILMN_1804329	-0.0804943
ILMN_1661490	-0.0804743
ILMN_1655498	-0.0804682
ILMN_2177413	-0.0804189
ILMN_2320964	-0.0804064
ILMN_1751016	-0.0804045
ILMN_1790410	-0.0803729
ILMN_1719392	-0.0802283
ILMN_1779855	-0.0802057
ILMN_1667222	-0.0800577
ILMN_1716895	-0.0800084
ILMN_1681777	-0.0799752
ILMN_1738347	-0.0799612
ILMN_1807525	-0.0799549
ILMN_2357438	-0.0798515
ILMN_1707372	-0.0798078
ILMN_1814281	-0.0797394
ILMN_1711208	-0.0797225
ILMN_1667906	-0.0796512
ILMN_1660793	-0.079644
ILMN_2120555	-0.0795992
ILMN_1795839	-0.0795982
ILMN_1720531	-0.0795911
ILMN_1793712	-0.0795289
ILMN_1761762	-0.0794963
ILMN_1796113	-0.079455
ILMN_1755051	-0.0794177
ILMN_2399208	-0.0793966
ILMN_1669718	-0.0793137
ILMN_1797191	-0.0792577
ILMN_1747504	-0.0792437
ILMN_1774990	-0.0792422
ILMN_1806387	-0.079231
ILMN_1810392	-0.0791869
ILMN_1768293	-0.0791081
ILMN_2105960	-0.0790993
ILMN_1738027	-0.0790899
ILMN_1717052	-0.0790851
ILMN_2108735	-0.0790712
ILMN_1800261	-0.0790554
ILMN_1809818	-0.0790052
ILMN_2193315	-0.078986
ILMN_2350266	-0.0789455
ILMN_1673991	-0.0789105
ILMN_2323366	-0.0789071
ILMN_2124386	-0.0788935
ILMN_1749834	-0.078811
ILMN_1814151	-0.0787018
ILMN_2353358	-0.0786953
ILMN_1724407	-0.0786116
ILMN_1859787	-0.0785792
ILMN_1682938	-0.0784477
ILMN_1782954	-0.0784274
ILMN_2176502	-0.078427
ILMN_1912417	-0.0784066
ILMN_1716468	-0.0784014
ILMN_1726928	-0.078325
ILMN_1715896	-0.0782923
ILMN_1802203	-0.0782775
ILMN_1656920	-0.078216
ILMN_2413833	-0.0781949
ILMN_1712628	-0.0781313
ILMN_1780465	-0.0781162
ILMN_1724497	-0.0780717
ILMN_1756727	-0.0780385
ILMN_1723139	-0.0780152
ILMN_1689046	-0.0779057
ILMN_2146372	-0.0778514
ILMN_1737398	-0.0778063
ILMN_1812776	-0.0778037
ILMN_1813131	-0.077785
ILMN_1765621	-0.0776615
ILMN_1797933	-0.0776486
ILMN_2364529	-0.0776283
ILMN_1785900	-0.077586
ILMN_1661000	-0.0775845
ILMN_1780887	-0.0775594
ILMN_1678781	-0.0775322
ILMN_1728380	-0.0775243
ILMN_2120340	-0.0775211
ILMN_1674231	-0.0774296
ILMN_1768640	-0.0774076
ILMN_1907649	-0.0773006
ILMN_1700822	-0.0772539
ILMN_1685661	-0.0772474
ILMN_1805104	-0.0772259
ILMN_2334204	-0.0772148
ILMN_1689097	-0.0771943
ILMN_1808059	-0.0771481
ILMN_1806040	-0.0771036
ILMN_1663390	-0.0770943
ILMN_1800130	-0.0770688
ILMN_1654013	-0.0769969
ILMN_1719763	-0.0769636
ILMN_1729115	-0.0769258
ILMN_2371055	-0.0769142
ILMN_1780769	-0.0768885
ILMN_1737195	-0.0768299
ILMN_1758392	-0.0768236
ILMN_1778917	-0.0768174
ILMN_2156936	-0.0767089
ILMN_1672080	-0.0766996
ILMN_2347380	-0.0766928
ILMN_1795976	-0.0766845
ILMN_1675852	-0.0766798
ILMN_2405797	-0.0766586
ILMN_1802843	-0.0766235
ILMN_1669310	-0.0765968
ILMN_1733875	-0.0765827
ILMN_1797209	-0.0765198
ILMN_1763704	-0.0765147
ILMN_2151818	-0.0764885
ILMN_1746699	-0.0764196
ILMN_1852159	-0.0764116
ILMN_1670353	-0.0764089
ILMN_1783337	-0.0763922
ILMN_1700888	-0.0763918
ILMN_1753449	-0.0763741
ILMN_1688853	-0.0763144
ILMN_1771734	-0.0762857
ILMN_1714805	-0.0762625
ILMN_1682288	-0.0762485
ILMN_2057566	-0.0762347
ILMN_1710523	-0.0761991
ILMN_1809139	-0.0761967
ILMN_2160210	-0.0761921
ILMN_1703891	-0.0761824
ILMN_1681324	-0.0761805
ILMN_1727073	-0.0761241
ILMN_1777318	-0.0761121
ILMN_1732404	-0.0760785
ILMN_1652929	-0.0760537
ILMN_1692511	-0.0760057
ILMN_2354269	-0.075996
ILMN_1661189	-0.0759915
ILMN_1659364	-0.0759545
ILMN_2357730	-0.0759333
ILMN_2317348	-0.075929
ILMN_1672662	-0.0759103
ILMN_2362545	-0.0758595
ILMN_1679209	-0.0758056
ILMN_2186678	-0.0757981
ILMN_1739233	-0.0757763
ILMN_1656540	-0.0757714
ILMN_2351466	-0.0757478
ILMN_1767523	-0.0757144
ILMN_1733519	-0.0757125
ILMN_2371911	-0.0756081
ILMN_2309534	-0.0755304
ILMN_1651237	-0.075506
ILMN_1748926	-0.0755044
ILMN_2245305	-0.0754972
ILMN_1696133	-0.0754782
ILMN_1795704	-0.0754665
ILMN_1737993	-0.0754531
ILMN_1808789	-0.0754065
ILMN_2368575	-0.0753749
ILMN_1727553	-0.0753725
ILMN_1657760	-0.0753611
ILMN_1671906	-0.0753549
ILMN_1757644	-0.0753336
ILMN_1654851	-0.075298
ILMN_2344130	-0.0752423
ILMN_1670640	-0.0752378
ILMN_1700955	-0.0752189
ILMN_1796074	-0.075163
ILMN_1734096	-0.0751332
ILMN_1752665	-0.0751295
ILMN_1653613	-0.0750654
ILMN_1693119	-0.0750206
ILMN_1674302	-0.075
ILMN_1716843	-0.074979
ILMN_1790987	-0.0749599
ILMN_1718023	-0.0749006
ILMN_1811515	-0.0748928
ILMN_1726603	-0.0748917
ILMN_1733746	-0.0748889
ILMN_1718934	-0.074873
ILMN_1686319	-0.0747041
ILMN_2306066	-0.0747013
ILMN_1720093	-0.074667
ILMN_1776487	-0.0745295
ILMN_1660727	-0.0745082
ILMN_1684591	-0.0744866
ILMN_2311089	-0.0744536
ILMN_1774287	-0.0744444
ILMN_2316955	-0.0744161
ILMN_1694514	-0.0744086
ILMN_2198878	-0.0742617
ILMN_1849494	-0.0740988
ILMN_1696243	-0.0740692
ILMN_2374633	-0.0740518
ILMN_1718972	-0.0740435
ILMN_1731073	-0.0740159
ILMN_1697317	-0.0739805
ILMN_1665559	-0.0739795
ILMN_1781987	-0.0739766
ILMN_2156267	-0.0739741
ILMN_1661809	-0.0739253
ILMN_1681249	-0.0738518
ILMN_2367681	-0.0738008
ILMN_1825275	-0.0737897
ILMN_1724941	-0.0737539
ILMN_1743911	-0.0737409
ILMN_1708105	-0.0737033
ILMN_1811387	-0.0736953
ILMN_2067709	-0.0736115
ILMN_2142353	-0.0735489
ILMN_1804090	-0.0735361
ILMN_1703593	-0.0735301
ILMN_1721138	-0.0735089
ILMN_1654653	-0.0735042
ILMN_1675927	-0.0734614
ILMN_2219712	-0.0734434
ILMN_2392080	-0.0734289
ILMN_1728199	-0.0733981
ILMN_2325506	-0.0733858
ILMN_1700887	-0.0732934
ILMN_1654268	-0.073293
ILMN_2153373	-0.0732732
ILMN_1747119	-0.0731597
ILMN_1672122	-0.073159
ILMN_2175236	-0.0731311
ILMN_1796923	-0.0731169
ILMN_1800942	-0.0731109
ILMN_1732127	-0.073095
ILMN_2400297	-0.0730877
ILMN_1688480	-0.073003
ILMN_1783610	-0.0729804
ILMN_1746368	-0.0729241
ILMN_2210482	-0.0729119
ILMN_1725417	-0.072903
ILMN_1664369	-0.0728706
ILMN_1813027	-0.0728596
ILMN_2346856	-0.0728147
ILMN_1836744	-0.0728054
ILMN_1683234	-0.0728013
ILMN_1774844	-0.0727828
ILMN_1736816	-0.07277
ILMN_1708341	-0.0727158
ILMN_2408938	-0.0726969
ILMN_1780298	-0.0726467
ILMN_2067708	-0.0726459
ILMN_1757736	-0.0725978
ILMN_2105923	-0.0725844
ILMN_2349006	-0.0725531
ILMN_2333440	-0.0725495
ILMN_1771149	-0.0724974
ILMN_2133534	-0.0724558
ILMN_2127477	-0.0724521
ILMN_1674236	-0.0724475
ILMN_1651628	-0.0723876
ILMN_1727809	-0.072385
ILMN_1654385	-0.0723669
ILMN_2276290	-0.0723518
ILMN_1660582	-0.0723268
ILMN_1756352	-0.0722555
ILMN_1753063	-0.0722206
ILMN_1812096	-0.0722199
ILMN_1727288	-0.0721582
ILMN_1660372	-0.0721052
ILMN_1803850	-0.072095
ILMN_2181060	-0.0720848
ILMN_1704065	-0.0720811
ILMN_1760779	-0.0720763
ILMN_1815668	-0.0720751
ILMN_1720965	-0.0720168
ILMN_1730202	-0.0719657
ILMN_1718831	-0.0719464
ILMN_1700728	-0.071935
ILMN_2316599	-0.0719327
ILMN_1804263	-0.0718635
ILMN_1778796	-0.0717976
ILMN_1741585	-0.071746
ILMN_1653501	-0.0717348
ILMN_1678300	-0.071733
ILMN_2330382	-0.0717074
ILMN_1772074	-0.0716035
ILMN_1706118	-0.071586
ILMN_1773200	-0.0715737
ILMN_1789112	-0.0715604
ILMN_1732688	-0.0715547
ILMN_1771689	-0.0714786
ILMN_2328280	-0.0714713
ILMN_1669631	-0.0714709
ILMN_1875510	-0.0714602
ILMN_1812567	-0.0714318
ILMN_1751431	-0.0714259
ILMN_1759277	-0.0713608
ILMN_1658206	-0.0713544
ILMN_1679438	-0.071348
ILMN_1714461	-0.0713461
ILMN_1680193	-0.0713404
ILMN_1756550	-0.0712999
ILMN_1733110	-0.0712593
ILMN_2365465	-0.0712308
ILMN_1718488	-0.0712073
ILMN_1758728	-0.0711905
ILMN_2382083	-0.0711707
ILMN_1733861	-0.0711147
ILMN_1653896	-0.0710615
ILMN_1783815	-0.0710431
ILMN_2187718	-0.0710186
ILMN_1808379	-0.0710161
ILMN_1912997	-0.0710154
ILMN_1746175	-0.0710016
ILMN_1706238	-0.0709805
ILMN_2370464	-0.0709765
ILMN_1910330	-0.0709591
ILMN_1742109	-0.0708931
ILMN_1700349	-0.0708719
ILMN_2139816	-0.0708632
ILMN_1806818	-0.0707141
ILMN_1807074	-0.0707082
ILMN_1715674	-0.0706902
ILMN_1737847	-0.0706793
ILMN_1680727	-0.0706763
ILMN_1866887	-0.0706566
ILMN_1836218	-0.0706505
ILMN_1754912	-0.0706229
ILMN_2356654	-0.0706017
ILMN_1723211	-0.0705926
ILMN_1785756	-0.0705863
ILMN_1662846	-0.0705704
ILMN_1760954	-0.0705665
ILMN_1792168	-0.0705549
ILMN_1691966	-0.0705504
ILMN_2275803	-0.0705184
ILMN_1720526	-0.070454
ILMN_2072603	-0.0704356
ILMN_1770053	-0.0704061
ILMN_1674032	-0.0703808
ILMN_2064150	-0.0703761
ILMN_1763539	-0.0703753
ILMN_1686804	-0.0703733
ILMN_1795937	-0.0703647
ILMN_2312498	-0.0703349
ILMN_1670752	-0.0703037
ILMN_2066088	-0.0702835
ILMN_1801928	-0.0702472
ILMN_1724424	-0.0702187
ILMN_1720604	-0.0702171
ILMN_2072357	-0.0701532
ILMN_1729167	-0.0701369
ILMN_1682929	-0.0701359
ILMN_1688022	-0.0701339
ILMN_2311674	-0.0701259
ILMN_1718483	-0.070122
ILMN_1685156	-0.0701027
ILMN_1803018	-0.0701018
ILMN_2092693	-0.0700866
ILMN_2368721	-0.0700739
ILMN_1730809	-0.0700432
ILMN_1700384	-0.0700296
ILMN_2064898	-0.0700205
ILMN_1808712	-0.0700111
ILMN_1663667	-0.0700063
ILMN_1868572	-0.0699924
ILMN_2398926	-0.0699857
ILMN_1693108	-0.0699588
ILMN_1740234	-0.0699313
ILMN_1783636	-0.0699141
ILMN_2379520	-0.0698934
ILMN_1738819	-0.0698923
ILMN_1784436	-0.0698118
ILMN_1815666	-0.0698071
ILMN_1764082	-0.0697901
ILMN_2182198	-0.0697569
ILMN_1718303	-0.0697561
ILMN_1653292	-0.0697319
ILMN_2175112	-0.0696873
ILMN_1756402	-0.0696776
ILMN_1692517	-0.0695985
ILMN_1715616	-0.0695899
ILMN_2160929	-0.0695873
ILMN_2401436	-0.0695871
ILMN_1694012	-0.0695718
ILMN_2154671	-0.0695341
ILMN_1813191	-0.0695244
ILMN_1719622	-0.0694971
ILMN_1671800	-0.0694552
ILMN_2056975	-0.0694491
ILMN_1761922	-0.0694101
ILMN_1796013	-0.0693851
ILMN_1812503	-0.0693832
ILMN_1764163	-0.0693793
ILMN_1806149	-0.0693665
ILMN_1741422	-0.0693633
ILMN_1750658	-0.069359
ILMN_1750262	-0.0693487
ILMN_1699357	-0.0693297
ILMN_1678423	-0.0693205
ILMN_1672443	-0.0692952
ILMN_2116127	-0.0692584
ILMN_1810891	-0.069237
ILMN_1725014	-0.0692055
ILMN_1711005	-0.0691898
ILMN_1708983	-0.0691351
ILMN_1706764	-0.0691205
ILMN_1675239	-0.0691188
ILMN_2373495	-0.0691021
ILMN_1696330	-0.0690691
ILMN_1790603	-0.0690164
ILMN_1756992	-0.0689555
ILMN_1728355	-0.0689498
ILMN_1783023	-0.0689432
ILMN_2398388	-0.06894
ILMN_1723871	-0.0689037
ILMN_1727444	-0.0688614
ILMN_2412564	-0.0688063
ILMN_1696657	-0.0687799
ILMN_2234412	-0.0686989
ILMN_1765574	-0.0686874
ILMN_2096012	-0.0686109
ILMN_1814589	-0.0685791
ILMN_2330948	-0.068573
ILMN_1682957	-0.0685498
ILMN_1798588	-0.0685438
ILMN_1726893	-0.0685297
ILMN_1674135	-0.0684592
ILMN_1778543	-0.0684437
ILMN_1776121	-0.0684193
ILMN_1725193	-0.068403
ILMN_1703284	-0.068353
ILMN_2157951	-0.0683336
ILMN_2364864	-0.0683238
ILMN_1712522	-0.0682866
ILMN_2191436	-0.068278
ILMN_1736234	-0.0682695
ILMN_1695687	-0.0682549
ILMN_1655195	-0.0682336
ILMN_1669983	-0.0682271
ILMN_2223805	-0.068226
ILMN_2382942	-0.0682163
ILMN_2047112	-0.0682127
ILMN_1687827	-0.0681823
ILMN_1753426	-0.0681685
ILMN_1706779	-0.0681541
ILMN_1776777	-0.068146
ILMN_1701457	-0.0681191
ILMN_1802627	-0.0680908
ILMN_2187533	-0.0680666
ILMN_1752843	-0.0680612
ILMN_1665622	-0.0680379
ILMN_1684271	-0.0680268
ILMN_1788416	-0.0680007
ILMN_2147345	-0.0679849
ILMN_1696556	-0.0679753
ILMN_1665797	-0.0679676
ILMN_1811373	-0.0679255
ILMN_1702363	-0.0678748
ILMN_2200503	-0.0678744
ILMN_1793829	-0.067865
ILMN_1813423	-0.0678625
ILMN_1728024	-0.0678523
ILMN_1898518	-0.0678085
ILMN_2123567	-0.0677959
ILMN_1799642	-0.0677655
ILMN_1752303	-0.0677175
ILMN_2372136	-0.0677096
ILMN_1682599	-0.0676798
ILMN_1809433	-0.0676265
ILMN_2392472	-0.0676245
ILMN_1805410	-0.0675465
ILMN_2306565	-0.0675446
ILMN_1721868	-0.0675421
ILMN_1659437	-0.06753
ILMN_2123431	-0.0675156
ILMN_2220187	-0.0674206
ILMN_1682095	-0.0674067
ILMN_1684439	-0.067401
ILMN_1704672	-0.0673806
ILMN_1710903	-0.0673804
ILMN_1702124	-0.067356
ILMN_1723042	-0.0673435
ILMN_1676322	-0.0673359
ILMN_1664012	-0.0673266
ILMN_1658821	-0.0673052
ILMN_1767129	-0.0672918
ILMN_1721623	-0.0672755
ILMN_1664511	-0.0672429
ILMN_2395043	-0.0672232
ILMN_1674386	-0.0671958
ILMN_1813260	-0.0671855
ILMN_1771224	-0.0671701
ILMN_1683082	-0.0670738
ILMN_1662158	-0.0670353
ILMN_1783690	-0.0670111
ILMN_2373755	-0.067007
ILMN_1800465	-0.0669964
ILMN_2098446	-0.0669357
ILMN_1729691	-0.0669266
ILMN_1769720	-0.0669014
ILMN_1789400	-0.066879
ILMN_1728887	-0.0668312
ILMN_1664682	-0.0668215
ILMN_1701487	-0.0668122
ILMN_1720857	-0.0668113
ILMN_2374352	-0.0668061
ILMN_2404629	-0.0667631
ILMN_1662952	-0.0667487
ILMN_1806634	-0.0667191
ILMN_2188966	-0.0667129
ILMN_1684984	-0.0666995
ILMN_1719250	-0.0666649
ILMN_1681998	-0.0666427
ILMN_2337740	-0.0666334
ILMN_2392356	-0.0666265
ILMN_1888988	-0.0666096
ILMN_1713846	-0.0666014
ILMN_2102960	-0.0665885
ILMN_1699206	-0.0665675
ILMN_1778764	-0.0665493
ILMN_1768393	-0.0665379
ILMN_1676036	-0.0665231
ILMN_2406299	-0.0664921
ILMN_1793966	-0.0664886
ILMN_1655403	-0.0664757
ILMN_1745501	-0.0664277
ILMN_1692198	-0.0664261
ILMN_1753482	-0.0664142
ILMN_1730977	-0.0663858
ILMN_1774708	-0.0663855
ILMN_1700563	-0.0663839
ILMN_1747546	-0.0663465
ILMN_1798379	-0.0662412
ILMN_1740559	-0.0662018
ILMN_1739374	-0.0661769
ILMN_1672000	-0.0660381
ILMN_1803889	-0.0660374
ILMN_1770911	-0.0660251
ILMN_2353862	-0.0660206
ILMN_1802819	-0.0660052
ILMN_1704385	-0.0660027
ILMN_1777233	-0.0659549
ILMN_2379931	-0.0658902
ILMN_1652445	-0.0658876
ILMN_2380938	-0.0658499
ILMN_1684352	-0.0658151
ILMN_1784655	-0.0658148
ILMN_1731237	-0.0658098
ILMN_1721651	-0.065765
ILMN_1750100	-0.0657576
ILMN_2115340	-0.0657247
ILMN_1701006	-0.0657019
ILMN_2382121	-0.0656859
ILMN_2131336	-0.0656743
ILMN_1726752	-0.0656721
ILMN_1774589	-0.0656707
ILMN_2342841	-0.0656652
ILMN_1787256	-0.0655751
ILMN_1803408	-0.0655525
ILMN_1670925	-0.0655435
ILMN_1755727	-0.0655408
ILMN_1712718	-0.0655227
ILMN_1779416	-0.065522
ILMN_1787815	-0.0655042
ILMN_1677314	-0.0655017
ILMN_1795342	-0.0655011
ILMN_1684929	-0.0654875
ILMN_1751425	-0.0654788
ILMN_2347888	-0.0654476
ILMN_1673521	-0.0654456
ILMN_2405156	-0.0654429
ILMN_1850338	-0.0654151
ILMN_1671494	-0.0653649
ILMN_2152828	-0.0653213
ILMN_1809971	-0.0653164
ILMN_1696615	-0.0652893
ILMN_1779353	-0.0652799
ILMN_1769018	-0.0652636
ILMN_1804822	-0.065218
ILMN_1651428	-0.0651964
ILMN_2341548	-0.065184
ILMN_1693853	-0.0651759
ILMN_2106994	-0.0651713
ILMN_1685079	-0.0651555
ILMN_1720998	-0.0651532
ILMN_1692620	-0.0651199
ILMN_1719403	-0.0651141
ILMN_2307740	-0.065114
ILMN_1730825	-0.0650965
ILMN_2413899	-0.0650837
ILMN_1801105	-0.0650833
ILMN_1745779	-0.0650659
ILMN_1776522	-0.0650597
ILMN_1757467	-0.0650342
ILMN_1736940	-0.0650335
ILMN_1679520	-0.0649911
ILMN_1801383	-0.0649477
ILMN_2375360	-0.064872
ILMN_1757317	-0.0648555
ILMN_1789839	-0.0648313
ILMN_1814856	-0.0648141
ILMN_1726352	-0.0648077
ILMN_1671933	-0.0647557
ILMN_1693941	-0.0647217
ILMN_1733927	-0.064702
ILMN_1757697	-0.0646912
ILMN_2172269	-0.0646804
ILMN_1741564	-0.0646626
ILMN_1733811	-0.0646595
ILMN_1789233	-0.0646544
ILMN_1808636	-0.0646366
ILMN_2148796	-0.0646312
ILMN_1788223	-0.0645612
ILMN_1662852	-0.0645103
ILMN_2220184	-0.0644975
ILMN_1720844	-0.0644643
ILMN_1689070	-0.0644492
ILMN_1691487	-0.0644455
ILMN_1745154	-0.0644389
ILMN_1719170	-0.0644321
ILMN_1673711	-0.0644252
ILMN_1714433	-0.0644071
ILMN_1748827	-0.064402
ILMN_1687864	-0.0643875
ILMN_1708328	-0.0643863
ILMN_1742145	-0.064379
ILMN_1758629	-0.064365
ILMN_1736340	-0.0643586
ILMN_1773493	-0.064352
ILMN_1801216	-0.0643433
ILMN_2075800	-0.064316
ILMN_1762095	-0.0643
ILMN_1742089	-0.0642925
ILMN_1758164	-0.0642797
ILMN_1814106	-0.0642687
ILMN_1691843	-0.064262
ILMN_2331735	-0.0642412
ILMN_1668861	-0.0642033
ILMN_2084073	-0.0642001
ILMN_1681221	-0.0641999
ILMN_1724489	-0.0641828
ILMN_1792931	-0.0641622
ILMN_1748970	-0.0641295
ILMN_1693145	-0.0641281
ILMN_2103685	-0.0641222
ILMN_1724668	-0.0641135
ILMN_1781198	-0.0640666
ILMN_1694323	-0.0640526
ILMN_1690523	-0.0640458
ILMN_1881526	-0.0640312
ILMN_1756878	-0.0640174
ILMN_1805796	-0.0640161
ILMN_2398903	-0.06397
ILMN_1671885	-0.0639479
ILMN_1666004	-0.0639468
ILMN_1714956	-0.0639428
ILMN_1754458	-0.0639398
ILMN_1766185	-0.0639107
ILMN_2132161	-0.0639049
ILMN_2104784	-0.0638941
ILMN_1655913	-0.0638773
ILMN_2325394	-0.0638687
ILMN_2065606	-0.0638353
ILMN_1789240	-0.0638188
ILMN_2364700	-0.0638001
ILMN_2255382	-0.0637881
ILMN_2086064	-0.0637858
ILMN_1673252	-0.0637691
ILMN_1683127	-0.0637475
ILMN_1660436	-0.0637365
ILMN_1899317	-0.0637359
ILMN_2401344	-0.0637341
ILMN_1746917	-0.0637182
ILMN_1741475	-0.0636979
ILMN_1764609	-0.0636429
ILMN_1699112	-0.0636263
ILMN_1696028	-0.0636116
ILMN_2227968	-0.0636032
ILMN_2092664	-0.0635925
ILMN_1752935	-0.0635878
ILMN_1809013	-0.0635866
ILMN_1717434	-0.0635734
ILMN_2310814	-0.0635632
ILMN_1813746	-0.0635571
ILMN_1792076	-0.0635542
ILMN_1799710	-0.0635103
ILMN_2074258	-0.0634683
ILMN_2050790	-0.0634436
ILMN_1776147	-0.0634323
ILMN_1772286	-0.0633992
ILMN_1742073	-0.0633975
ILMN_1749478	-0.0633906
ILMN_2054392	-0.0633795
ILMN_1734827	-0.0633685
ILMN_1676005	-0.0633403
ILMN_1709717	-0.063331
ILMN_1688464	-0.0633295
ILMN_2075440	-0.0632911
ILMN_1756445	-0.0632848
ILMN_1798172	-0.0632796
ILMN_2083333	-0.0632711
ILMN_2103591	-0.063268
ILMN_2151277	-0.0632651
ILMN_1740842	-0.0632377
ILMN_1668795	-0.0632344
ILMN_1694533	-0.0631683
ILMN_1663113	-0.063168
ILMN_2184612	-0.0631599
ILMN_1801866	-0.0631273
ILMN_1704873	-0.0630348
ILMN_1651329	-0.0629386
ILMN_1742507	-0.0629176
ILMN_1702197	-0.0628839
ILMN_1728298	-0.0628666
ILMN_1693311	-0.0628623
ILMN_1735415	-0.0628601
ILMN_1657446	-0.0628429
ILMN_1692665	-0.0628325
ILMN_1910550	-0.0628076
ILMN_2386100	-0.0627737
ILMN_1715625	-0.062755
ILMN_1660602	-0.0627424
ILMN_1800634	-0.062679
ILMN_1752589	-0.0626726
ILMN_1793543	-0.0626541
ILMN_1717403	-0.0626509
ILMN_1749014	-0.0626494
ILMN_2210129	-0.0626376
ILMN_1808095	-0.0625711
ILMN_1769517	-0.0625066
ILMN_1730523	-0.0624484
ILMN_2137084	-0.0624315
ILMN_1784380	-0.0624122
ILMN_1785177	-0.0624108
ILMN_1774336	-0.0623886
ILMN_2089167	-0.0623847
ILMN_2220735	-0.0623748
ILMN_2402392	-0.0623686
ILMN_1747067	-0.0623562
ILMN_1661622	-0.0623199
ILMN_1777644	-0.0623175
ILMN_1732537	-0.0623013
ILMN_1770653	-0.0622816
ILMN_1712773	-0.0622795
ILMN_1704139	-0.0622498
ILMN_2099594	-0.0622187
ILMN_1681812	-0.0622003
ILMN_2142117	-0.0621901
ILMN_1726667	-0.0621536
ILMN_1706817	-0.0621393
ILMN_1728349	-0.0621123
ILMN_1759411	-0.0620892
ILMN_2249288	-0.0620879
ILMN_1789342	-0.0620375
ILMN_1734596	-0.0620295
ILMN_1700001	-0.0620163
ILMN_1730612	-0.0620098
ILMN_1808568	-0.061981
ILMN_1742461	-0.0619711
ILMN_1732885	-0.0619653
ILMN_1741350	-0.0619418
ILMN_1750661	-0.0619052
ILMN_1794046	-0.0619018
ILMN_1813100	-0.0619011
ILMN_1695110	-0.0618742
ILMN_1717294	-0.0618561
ILMN_1764207	-0.0618282
ILMN_1768818	-0.0618192
ILMN_1725510	-0.061817
ILMN_2196588	-0.0617983
ILMN_1728799	-0.0617893
ILMN_2116075	-0.0617552
ILMN_1796461	-0.061749
ILMN_1748057	-0.0617436
ILMN_1789627	-0.061741
ILMN_1703370	-0.0617401
ILMN_1657237	-0.0617015
ILMN_1724406	-0.0616891
ILMN_1666372	-0.0616431
ILMN_2126239	-0.0616387
ILMN_1850238	-0.0616202
ILMN_1805992	-0.0616159
ILMN_1673073	-0.0615987
ILMN_1720442	-0.0615854
ILMN_1706531	-0.0615583
ILMN_2384807	-0.0615493
ILMN_2399503	-0.0615434
ILMN_1707493	-0.0615239
ILMN_1814789	-0.0614835
ILMN_1809889	-0.061458
ILMN_1734190	-0.0614459
ILMN_1806463	-0.0613796
ILMN_2342033	-0.0613665
ILMN_1742779	-0.061361
ILMN_1765082	-0.061359
ILMN_1776047	-0.0613535
ILMN_1768181	-0.0613532
ILMN_1784206	-0.0613276
ILMN_2224833	-0.0613107
ILMN_2336609	-0.0613045
ILMN_1703153	-0.0613041
ILMN_2362457	-0.0612993
ILMN_1768662	-0.0612991
ILMN_1652913	-0.0612743
ILMN_2336728	-0.0612739
ILMN_2286400	-0.0612571
ILMN_1794912	-0.0612294
ILMN_2115591	-0.0612191
ILMN_1670517	-0.0612151
ILMN_1677910	-0.0612096
ILMN_1670000	-0.0611846
ILMN_1659027	-0.0611762
ILMN_1733863	-0.0611726
ILMN_1862521	-0.0611495
ILMN_1666314	-0.0611307
ILMN_1685174	-0.0611245
ILMN_1715505	-0.0610888
ILMN_1690807	-0.0610528
ILMN_2189605	-0.0610089
ILMN_1815874	-0.0610004
ILMN_1704500	-0.0609787
ILMN_1664231	-0.0609719
ILMN_1789990	-0.0609662
ILMN_1658695	-0.0609416
ILMN_1669456	-0.0609285
ILMN_2281069	-0.0609267
ILMN_2312386	-0.0609073
ILMN_2337835	-0.0608985
ILMN_1808779	-0.0608841
ILMN_1779381	-0.0608664
ILMN_1756674	-0.0608464
ILMN_1748241	-0.0608448
ILMN_1770940	-0.0608241
ILMN_2396948	-0.060801
ILMN_1736054	-0.0607673
ILMN_1727055	-0.0607669
ILMN_2062381	-0.0607638
ILMN_2404256	-0.0607502
ILMN_2179018	-0.0607383
ILMN_1709814	-0.060734
ILMN_1736888	-0.0607239
ILMN_1765945	-0.0606942
ILMN_2038778	-0.0606721
ILMN_1742705	-0.0606693
ILMN_1681741	-0.0606328
ILMN_2351611	-0.0606312
ILMN_1694950	-0.0606147
ILMN_1680692	-0.0606118
ILMN_1679158	-0.0606022
ILMN_1755741	-0.0606008
ILMN_1683562	-0.060594
ILMN_1787595	-0.0605867
ILMN_2318685	-0.0605819
ILMN_2173524	-0.0605746
ILMN_1807649	-0.0605138
ILMN_1752476	-0.0605083
ILMN_1785324	-0.0605047
ILMN_1795341	-0.0604917
ILMN_1687626	-0.0604843
ILMN_1709334	-0.0604445
ILMN_1702696	-0.0603993
ILMN_1770035	-0.0603918
ILMN_1797813	-0.0603838
ILMN_1772302	-0.0603824
ILMN_1667857	-0.060363
ILMN_1674706	-0.0603285
ILMN_1651496	-0.0603056
ILMN_1745256	-0.060301
ILMN_1735180	-0.0602989
ILMN_1814643	-0.0602902
ILMN_1759910	-0.0602894
ILMN_1881081	-0.0602791
ILMN_1702177	-0.0602689
ILMN_1755281	-0.0602492
ILMN_1805177	-0.0602431
ILMN_2258268	-0.0602305
ILMN_2075820	-0.0602265
ILMN_1660654	-0.0602118
ILMN_1665300	-0.0602108
ILMN_1668639	-0.0602048
ILMN_2214197	-0.0602019
ILMN_1791770	-0.0601969
ILMN_1783695	-0.0601949
ILMN_2389582	-0.0601576
ILMN_1806456	-0.0601572
ILMN_1765401	-0.0601437
ILMN_1763011	-0.0601405
ILMN_1781795	-0.0601403
ILMN_1757837	-0.0601326
ILMN_2286870	-0.0601209
ILMN_1683959	-0.0601161
ILMN_1757660	-0.0600895
ILMN_1732775	-0.0600844
ILMN_1660305	-0.0600834
ILMN_2404906	-0.0600734
ILMN_1712291	-0.0600684
ILMN_1742330	-0.0600671
ILMN_2222651	-0.060057
ILMN_1805228	-0.0600098
ILMN_1799280	-0.0599622
ILMN_1670931	-0.0599462
ILMN_1679880	-0.0599159
ILMN_1806601	-0.0599061
ILMN_1763404	-0.059896
ILMN_1717975	-0.0598589
ILMN_2346769	-0.0598457
ILMN_1698733	-0.0598258
ILMN_2373515	-0.0598092
ILMN_2256953	-0.0597966
ILMN_1785731	-0.059782
ILMN_1729123	-0.0597814
ILMN_1791580	-0.0597781
ILMN_2043109	-0.0597714
ILMN_2298511	-0.0597389
ILMN_1808404	-0.059725
ILMN_1776674	-0.0597134
ILMN_1811330	-0.0596963
ILMN_2126706	-0.0596682
ILMN_2365686	-0.0596447
ILMN_1797557	-0.0596429
ILMN_1701512	-0.0596185
ILMN_2162328	-0.059601
ILMN_1757631	-0.0595863
ILMN_1738263	-0.0595705
ILMN_1655642	-0.0595447
ILMN_1721170	-0.0595321
ILMN_2096985	-0.0595235
ILMN_1693985	-0.0595117
ILMN_1652602	-0.0595009
ILMN_1724612	-0.0594981
ILMN_2369826	-0.0594966
ILMN_1741954	-0.0594882
ILMN_1713884	-0.0594868
ILMN_2136147	-0.0594633
ILMN_1697561	-0.0594456
ILMN_1698470	-0.0594423
ILMN_1696485	-0.0594394
ILMN_1670542	-0.0594328
ILMN_1693664	-0.0594177
ILMN_2340065	-0.0593757
ILMN_1773262	-0.0593259
ILMN_1655663	-0.0593185
ILMN_2336647	-0.0593165
ILMN_1773407	-0.0593084
ILMN_1698885	-0.0593064
ILMN_2338116	-0.0593003
ILMN_1825773	-0.0592883
ILMN_1738989	-0.0592585
ILMN_1745813	-0.059244
ILMN_1655614	-0.0592383
ILMN_2355738	-0.0592014
ILMN_1713521	-0.0591953
ILMN_2366388	-0.0591878
ILMN_1683905	-0.0591806
ILMN_1719599	-0.059159
ILMN_1810225	-0.0591489
ILMN_1797307	-0.0591479
ILMN_1687384	-0.0591469
ILMN_1730639	-0.0591283
ILMN_1735996	-0.0591111
ILMN_1790100	-0.0591039
ILMN_1701882	-0.0590886
ILMN_1701077	-0.0590838
ILMN_2330845	-0.0590817
ILMN_1740493	-0.0590351
ILMN_1725773	-0.0590268
ILMN_1679555	-0.0590239
ILMN_1793932	-0.0590222
ILMN_1687279	-0.0590218
ILMN_2363361	-0.0590145
ILMN_2235137	-0.0589781
ILMN_1865055	-0.0589725
ILMN_1734479	-0.0589527
ILMN_1715113	-0.0589515
ILMN_1839750	-0.0589499
ILMN_1789436	-0.0589413
ILMN_2085922	-0.05894
ILMN_2351241	-0.0589299
ILMN_1701293	-0.0589262
ILMN_1759453	-0.0589047
ILMN_1887174	-0.0588888
ILMN_1657631	-0.0588767
ILMN_1741224	-0.0588763
ILMN_2337336	-0.0588639
ILMN_1708151	-0.0588547
ILMN_1723480	-0.0588526
ILMN_1716400	-0.0588503
ILMN_1736974	-0.0587958
ILMN_1754655	-0.0587825
ILMN_1687958	-0.0587781
ILMN_1719471	-0.0587405
ILMN_1651262	-0.0587349
ILMN_2294431	-0.0587193
ILMN_1660775	-0.0587033
ILMN_1771057	-0.0587028
ILMN_1765159	-0.0587027
ILMN_1736628	-0.0586744
ILMN_1730622	-0.0586558
ILMN_1714759	-0.0586355
ILMN_1652472	-0.0586302
ILMN_1809951	-0.0585985
ILMN_1683462	-0.058578
ILMN_1769264	-0.0585653
ILMN_1916292	-0.0585641
ILMN_2252136	-0.0585581
ILMN_1674703	-0.058556
ILMN_1707156	-0.0585451
ILMN_1680507	-0.0585405
ILMN_2136635	-0.0585253
ILMN_2240221	-0.0585221
ILMN_2404512	-0.0585147
ILMN_1713163	-0.0585119
ILMN_1778677	-0.0585049
ILMN_2253300	-0.0584863
ILMN_2402936	-0.0584747
ILMN_1773247	-0.0584286
ILMN_1789074	-0.0584134
ILMN_1758229	-0.058382
ILMN_1682301	-0.0583531
ILMN_1687484	-0.0583453
ILMN_1698330	-0.0583315
ILMN_1751984	-0.0583094
ILMN_1748578	-0.0583039
ILMN_1683441	-0.0582965
ILMN_1767894	-0.0582841
ILMN_1712312	-0.0582719
ILMN_1707858	-0.0582629
ILMN_1869087	-0.0582449
ILMN_1655985	-0.058229
ILMN_1684045	-0.0581844
ILMN_1680652	-0.0581517
ILMN_1722858	-0.0581471
ILMN_1683475	-0.0581391
ILMN_1776967	-0.0581043
ILMN_1714952	-0.0580867
ILMN_1775573	-0.0580828
ILMN_1671392	-0.0580447
ILMN_1806266	-0.0580432
ILMN_1669607	-0.0580366
ILMN_1761882	-0.0580278
ILMN_1758293	-0.0580249
ILMN_1777483	-0.0580124
ILMN_1697546	-0.0580117
ILMN_1843403	-0.0580045
ILMN_1670377	-0.057953
ILMN_1677567	-0.0579398
ILMN_1708101	-0.0579152
ILMN_1754600	-0.0578986
ILMN_1763842	-0.0578902
ILMN_1794782	-0.0578864
ILMN_1842426	-0.057855
ILMN_1756086	-0.0578018
ILMN_1742881	-0.0577895
ILMN_1772686	-0.0577719
ILMN_1748767	-0.0577619
ILMN_1708204	-0.0577547
ILMN_2181432	-0.0577281
ILMN_2374115	-0.0577232
ILMN_1784860	-0.0577148
ILMN_1763568	-0.0576938
ILMN_2401779	-0.0576922
ILMN_1685540	-0.0576909
ILMN_1800993	-0.0576257
ILMN_1741148	-0.0576241
ILMN_2387952	-0.0576157
ILMN_1660222	-0.0576157
ILMN_1792383	-0.0576111
ILMN_1811754	-0.0576108
ILMN_1739683	-0.0576044
ILMN_1667839	-0.0575797
ILMN_1805342	-0.0575461
ILMN_1744023	-0.0575421
ILMN_2314244	-0.0575143
ILMN_1681467	-0.0575029
ILMN_2191568	-0.0574974
ILMN_2070013	-0.0574913
ILMN_1746031	-0.0574352
ILMN_1724666	-0.0574292
ILMN_2055700	-0.0574286
ILMN_1759023	-0.057397
ILMN_1810228	-0.0573941
ILMN_1812477	-0.0573809
ILMN_1774661	-0.057378
ILMN_1779015	-0.0573678
ILMN_1806328	-0.0573628
ILMN_1670532	-0.0573596
ILMN_1745021	-0.0573541
ILMN_1773576	-0.0573499
ILMN_2126344	-0.057346
ILMN_2194627	-0.0573358
ILMN_2075065	-0.0573273
ILMN_1680010	-0.0573054
ILMN_1804328	-0.0572913
ILMN_2209180	-0.0572827
ILMN_2311537	-0.0572726
ILMN_1747506	-0.0572494
ILMN_2307744	-0.0572423
ILMN_1742166	-0.0572272
ILMN_2402766	-0.0572048
ILMN_1814966	-0.057182
ILMN_1755383	-0.0571757
ILMN_1795582	-0.0571614
ILMN_1748529	-0.057141
ILMN_1678619	-0.0571366
ILMN_1687419	-0.0571353
ILMN_1695588	-0.0571244
ILMN_1758924	-0.0571185
ILMN_1709484	-0.0571151
ILMN_1778187	-0.0571044
ILMN_1802642	-0.0571014
ILMN_1804597	-0.0570867
ILMN_1733407	-0.0570829
ILMN_1789593	-0.0570777
ILMN_2221408	-0.0570665
ILMN_1759206	-0.0570347
ILMN_1675479	-0.057033
ILMN_1663132	-0.0570237
ILMN_1765796	-0.0570143
ILMN_2364110	-0.0570053
ILMN_1749327	-0.0569888
ILMN_1786036	-0.056982
ILMN_1659206	-0.0569799
ILMN_1741005	-0.0569669
ILMN_2354617	-0.0569267
ILMN_2059797	-0.0569194
ILMN_1784256	-0.0569077
ILMN_1780268	-0.0568853
ILMN_1727526	-0.0568811
ILMN_1710668	-0.0568335
ILMN_1861270	-0.0568255
ILMN_1714108	-0.0568243
ILMN_1714417	-0.0568238
ILMN_1688639	-0.0568158
ILMN_1700515	-0.056797
ILMN_2366864	-0.0567882
ILMN_2223130	-0.056757
ILMN_1804834	-0.0567194
ILMN_1804988	-0.0567097
ILMN_1697694	-0.0567017
ILMN_1768816	-0.0566917
ILMN_1757627	-0.0566886
ILMN_1849033	-0.0566831
ILMN_1723632	-0.0566439
ILMN_1692896	-0.0566415
ILMN_2104967	-0.0566377
ILMN_1717477	-0.0566082
ILMN_2374778	-0.0566019
ILMN_1659082	-0.0565825
ILMN_1777342	-0.0565751
ILMN_1693882	-0.0565654
ILMN_2404407	-0.0565613
ILMN_1756826	-0.0565558
ILMN_1743402	-0.0565538
ILMN_1700306	-0.0565413
ILMN_1732071	-0.056539
ILMN_2232157	-0.0565344
ILMN_1719835	-0.0565188
ILMN_2075436	-0.056507
ILMN_1791052	-0.0564977
ILMN_1777449	-0.0564631
ILMN_1654064	-0.0564543
ILMN_1748651	-0.0564293
ILMN_2366177	-0.0564235
ILMN_2065299	-0.0564197
ILMN_1814967	-0.056409
ILMN_2265654	-0.0564051
ILMN_2343624	-0.0563853
ILMN_1722218	-0.0563843
ILMN_1708728	-0.0563714
ILMN_1769532	-0.056371
ILMN_1721167	-0.0563601
ILMN_1722648	-0.0563506
ILMN_1755405	-0.0563474
ILMN_1723443	-0.0563387
ILMN_1685480	-0.0563379
ILMN_2273572	-0.0563297
ILMN_1653553	-0.0562941
ILMN_1742976	-0.0562777
ILMN_2181883	-0.0562656
ILMN_1857897	-0.0562571
ILMN_1678730	-0.0562558
ILMN_2155172	-0.0562304
ILMN_2225718	-0.0562252
ILMN_2058070	-0.056225
ILMN_2096654	-0.0562222
ILMN_2412101	-0.0562185
ILMN_2372040	-0.0561792
ILMN_1658425	-0.0561616
ILMN_1672149	-0.0561549
ILMN_1778255	-0.0561391
ILMN_1678814	-0.0561375
ILMN_1738784	-0.056136
ILMN_2175114	-0.05612
ILMN_1738369	-0.0561046
ILMN_2202423	-0.0561024
ILMN_1693538	-0.0560907
ILMN_1707337	-0.0560628
ILMN_2349600	-0.0560471
ILMN_2333319	-0.0560282
ILMN_2177832	-0.056018
ILMN_1702635	-0.0560078
ILMN_1763144	-0.0559545
ILMN_2336186	-0.0559461
ILMN_1737862	-0.0559389
ILMN_1814173	-0.0559378
ILMN_2221006	-0.0559342
ILMN_1756469	-0.0559313
ILMN_1730291	-0.0559163
ILMN_1693340	-0.0558958
ILMN_1795666	-0.0558953
ILMN_2354237	-0.0558401
ILMN_1657204	-0.0558216
ILMN_1750967	-0.0557566
ILMN_2344204	-0.0557513
ILMN_1683992	-0.0557459
ILMN_1785191	-0.0557456
ILMN_2226415	-0.0557299
ILMN_1790973	-0.0556958
ILMN_1715905	-0.0556849
ILMN_2106167	-0.0556721
ILMN_1770412	-0.0556628
ILMN_1806951	-0.0556582
ILMN_1776483	-0.0556508
ILMN_1800975	-0.0556415
ILMN_2218648	-0.055632
ILMN_1651315	-0.0556164
ILMN_1760855	-0.0556107
ILMN_1656904	-0.0556059
ILMN_1697377	-0.0555802
ILMN_1761486	-0.0555717
ILMN_1850277	-0.0554786
ILMN_2144116	-0.0554783
ILMN_1685413	-0.0554273
ILMN_1659343	-0.0554144
ILMN_2224031	-0.0553961
ILMN_1703092	-0.0553881
ILMN_1655545	-0.0553793
ILMN_1758173	-0.0553751
ILMN_1724907	-0.0553703
ILMN_2321975	-0.0553514
ILMN_1838863	-0.0553496
ILMN_1666384	-0.0553124
ILMN_1741674	-0.0553107
ILMN_2041046	-0.0553035
ILMN_1745946	-0.0553009
ILMN_1654287	-0.0552905
ILMN_1741200	-0.0552815
ILMN_1781638	-0.0552588
ILMN_1745116	-0.0552494
ILMN_1675219	-0.0552464
ILMN_1657746	-0.0552376
ILMN_2168449	-0.055234
ILMN_1904619	-0.055232
ILMN_1707021	-0.0552308
ILMN_1728984	-0.0552277
ILMN_1675483	-0.0552243
ILMN_1712432	-0.055224
ILMN_1814787	-0.0552136
ILMN_2086417	-0.0552102
ILMN_1659620	-0.0551987
ILMN_1783285	-0.0551878
ILMN_2326071	-0.0551872
ILMN_1815124	-0.0551734
ILMN_2135798	-0.0551533
ILMN_1732143	-0.0551437
ILMN_1691430	-0.0551377
ILMN_1681437	-0.0551175
ILMN_1810441	-0.0551017
ILMN_1680353	-0.0550763
ILMN_1682792	-0.0550457
ILMN_1815718	-0.055031
ILMN_1755321	-0.0550298
ILMN_1755123	-0.0550117
ILMN_2098726	-0.0549735
ILMN_2394296	-0.0549551
ILMN_2411282	-0.0549358
ILMN_2091792	-0.0549327
ILMN_2288784	-0.0549076
ILMN_1674633	-0.0548888
ILMN_1776516	-0.0548837
ILMN_2382558	-0.0548826
ILMN_2381064	-0.0548822
ILMN_1759297	-0.0548545
ILMN_1661424	-0.0548497
ILMN_1756043	-0.0548285
ILMN_1802951	-0.0548029
ILMN_1735445	-0.0547948
ILMN_1676749	-0.0547948
ILMN_1747412	-0.0547748
ILMN_1678095	-0.0547727
ILMN_2224143	-0.054766
ILMN_1704431	-0.0547421
ILMN_1695868	-0.0547333
ILMN_1689445	-0.0546916
ILMN_1666552	-0.0546911
ILMN_1676731	-0.0546729
ILMN_2329927	-0.0546625
ILMN_2110532	-0.0546555
ILMN_1798380	-0.0546555
ILMN_1831342	-0.0546524
ILMN_2393994	-0.0546523
ILMN_1667319	-0.0546477
ILMN_1801905	-0.05461
ILMN_2113362	-0.0545872
ILMN_1684385	-0.0545682
ILMN_1664718	-0.0545632
ILMN_2363498	-0.0545437
ILMN_1834856	-0.0545387
ILMN_1677032	-0.0545161
ILMN_1672042	-0.0545158
ILMN_2092536	-0.0545157
ILMN_1659725	-0.0545156
ILMN_1666632	-0.0545082
ILMN_1886595	-0.0545035
ILMN_1752802	-0.054496
ILMN_1671600	-0.0544861
ILMN_1675085	-0.0544705
ILMN_2392352	-0.0544583
ILMN_1710962	-0.054433
ILMN_2379240	-0.0544258
ILMN_1695847	-0.0544253
ILMN_2350801	-0.054417
ILMN_1711368	-0.0544138
ILMN_1654421	-0.0543719
ILMN_1734366	-0.0543558
ILMN_1722102	-0.054351
ILMN_1756877	-0.0543438
ILMN_1708160	-0.0543308
ILMN_1802628	-0.0543155
ILMN_1680591	-0.0543122
ILMN_1803647	-0.0542946
ILMN_1678086	-0.0542771
ILMN_1764314	-0.054275
ILMN_1736176	-0.0542725
ILMN_1708081	-0.0542481
ILMN_1695357	-0.0542132
ILMN_1731612	-0.0542056
ILMN_1773312	-0.0541977
ILMN_1847822	-0.0541899
ILMN_1742379	-0.0541844
ILMN_1702806	-0.0541458
ILMN_1761083	-0.0541246
ILMN_2097858	-0.0541043
ILMN_1686387	-0.0541012
ILMN_1667791	-0.0540937
ILMN_1781281	-0.0540914
ILMN_1686920	-0.0540853
ILMN_1660277	-0.0540722
ILMN_2387799	-0.0540657
ILMN_1662184	-0.0540626
ILMN_1690923	-0.0540454
ILMN_2115991	-0.0540412
ILMN_2411190	-0.0540323
ILMN_2068991	-0.0540173
ILMN_1685703	-0.054012
ILMN_1669928	-0.0540108
ILMN_2228453	-0.0539891
ILMN_2344455	-0.0539883
ILMN_1718629	-0.0539779
ILMN_1709177	-0.0539573
ILMN_1673270	-0.0539569
ILMN_1705922	-0.0539549
ILMN_1662964	-0.0539344
ILMN_2383455	-0.0539325
ILMN_2383489	-0.0539209
ILMN_1803036	-0.0539169
ILMN_1745262	-0.0539166
ILMN_1771732	-0.053907
ILMN_1658472	-0.0539034
ILMN_1800750	-0.0538989
ILMN_2095273	-0.0538833
ILMN_1883298	-0.0538762
ILMN_1693367	-0.0538709
ILMN_2298860	-0.0538549
ILMN_1733042	-0.0538369
ILMN_1707077	-0.0538348
ILMN_1715392	-0.0538316
ILMN_1779341	-0.0538256
ILMN_1694502	-0.053802
ILMN_1725946	-0.0537965
ILMN_1711543	-0.0537715
ILMN_1811615	-0.0537633
ILMN_2382505	-0.0537521
ILMN_1730464	-0.0537479
ILMN_1786347	-0.0537345
ILMN_2161832	-0.0537308
ILMN_1752967	-0.0537293
ILMN_1743427	-0.0537194
ILMN_1789001	-0.0537178
ILMN_1805800	-0.0537027
ILMN_1755335	-0.0536942
ILMN_1719870	-0.0536732
ILMN_1786843	-0.0536551
ILMN_2331636	-0.0536392
ILMN_1702519	-0.0536324
ILMN_2128639	-0.0536048
ILMN_1662438	-0.0535842
ILMN_1688565	-0.0535744
ILMN_1685289	-0.0535734
ILMN_2067370	-0.0535704
ILMN_2355042	-0.0535595
ILMN_1773109	-0.0535549
ILMN_1804652	-0.0535495
ILMN_1752837	-0.053547
ILMN_1692168	-0.0535176
ILMN_2272708	-0.0535152
ILMN_1758642	-0.053507
ILMN_1731518	-0.053507
ILMN_1711314	-0.0534792
ILMN_1753498	-0.053465
ILMN_1795474	-0.053435
ILMN_1669842	-0.0534151
ILMN_1762407	-0.0534082
ILMN_1722127	-0.0533665
ILMN_1681310	-0.0533604
ILMN_1719256	-0.0533408
ILMN_1751816	-0.0533371
ILMN_1733115	-0.0533361
ILMN_1708059	-0.053326
ILMN_1796177	-0.0533145
ILMN_2093231	-0.0533046
ILMN_1653438	-0.0532892
ILMN_1802377	-0.0532795
ILMN_1751378	-0.0532407
ILMN_1803124	-0.0532368
ILMN_1811470	-0.0532107
ILMN_1804539	-0.0532101
ILMN_1716336	-0.0532016
ILMN_2220729	-0.0532002
ILMN_2256359	-0.0531807
ILMN_1673941	-0.0531509
ILMN_1754547	-0.0531417
ILMN_1714401	-0.0531366
ILMN_2186482	-0.0531096
ILMN_1782633	-0.0531076
ILMN_1664030	-0.0531057
ILMN_1680132	-0.0531033
ILMN_1705774	-0.0530957
ILMN_1674859	-0.0530932
ILMN_1678766	-0.0530905
ILMN_1813938	-0.0530852
ILMN_1780188	-0.0530785
ILMN_2406532	-0.0530519
ILMN_2159453	-0.0530287
ILMN_1769388	-0.0530085
ILMN_1715705	-0.0529711
ILMN_1756998	-0.0529577
ILMN_1712806	-0.0529125
ILMN_2360307	-0.0528992
ILMN_1771962	-0.052894
ILMN_1676026	-0.0528778
ILMN_1785831	-0.0528764
ILMN_1813607	-0.0528742
ILMN_1655485	-0.0528518
ILMN_2273609	-0.0528464
ILMN_1665311	-0.0528402
ILMN_1719826	-0.0528044
ILMN_2335718	-0.0528016
ILMN_1805024	-0.0527816
ILMN_1673522	-0.0527581
ILMN_1756126	-0.0527508
ILMN_1722056	-0.0527495
ILMN_1789642	-0.0527468
ILMN_1670472	-0.0527426
ILMN_1683243	-0.0527348
ILMN_1795454	-0.0527261
ILMN_1806963	-0.0527179
ILMN_1682336	-0.0527153
ILMN_1813645	-0.0526903
ILMN_1694268	-0.0526888
ILMN_1773751	-0.0526772
ILMN_1757995	-0.0526627
ILMN_1672565	-0.0526538
ILMN_1691926	-0.0526171
ILMN_1652160	-0.0526072
ILMN_1663195	-0.0526029
ILMN_2153679	-0.0525961
ILMN_1729495	-0.0525505
ILMN_2111187	-0.0525408
ILMN_1743095	-0.0525395
ILMN_2105966	-0.0525352
ILMN_1700896	-0.0525274
ILMN_1701653	-0.0525192
ILMN_1701724	-0.0525117
ILMN_2141259	-0.0524982
ILMN_1847334	-0.0524909
ILMN_2352326	-0.0524665
ILMN_1704476	-0.0524542
ILMN_1716674	-0.0524418
ILMN_2151817	-0.052437
ILMN_1728907	-0.0524125
ILMN_1795609	-0.0523987
ILMN_2183784	-0.052396
ILMN_1725188	-0.0523954
ILMN_2310589	-0.0523883
ILMN_1779512	-0.0523838
ILMN_1713247	-0.0523604
ILMN_2298958	-0.052348
ILMN_2281734	-0.0523383
ILMN_1709634	-0.0523298
ILMN_1721628	-0.0523255
ILMN_2389528	-0.0523082
ILMN_1746252	-0.0523025
ILMN_1690487	-0.0523001
ILMN_1769545	-0.0522895
ILMN_2215881	-0.0522743
ILMN_2355971	-0.0522718
ILMN_1799389	-0.0522537
ILMN_1664440	-0.0522477
ILMN_1748923	-0.0522398
ILMN_1799579	-0.0522295
ILMN_1729546	-0.0522132
ILMN_1788874	-0.0521767
ILMN_1760506	-0.0521746
ILMN_2332990	-0.0521609
ILMN_1677439	-0.0521447
ILMN_1710000	-0.0521349
ILMN_2352216	-0.0521077
ILMN_1739497	-0.0521032
ILMN_1773369	-0.0521006
ILMN_2041293	-0.0520981
ILMN_1797181	-0.0520919
ILMN_1770676	-0.0520851
ILMN_1888609	-0.0520765
ILMN_1873621	-0.0520757
ILMN_1670948	-0.0520752
ILMN_1740960	-0.0520653
ILMN_1803254	-0.0520604
ILMN_1798804	-0.0520404
ILMN_1728230	-0.0520063
ILMN_1669317	-0.0519986
ILMN_2327974	-0.0519973
ILMN_1666471	-0.0519729
ILMN_1710170	-0.0519507
ILMN_1658027	-0.0519458
ILMN_1693394	-0.0519131
ILMN_2090123	-0.0519114
ILMN_2341487	-0.0519108
ILMN_1790518	-0.0519038
ILMN_2248725	-0.0518916
ILMN_1795927	-0.0518659
ILMN_1840294	-0.0518633
ILMN_1799103	-0.0518616
ILMN_1737943	-0.051834
ILMN_1661078	-0.0518278
ILMN_1761301	-0.051808
ILMN_1746359	-0.0518074
ILMN_1669366	-0.0517717
ILMN_2282959	-0.0517668
ILMN_1683204	-0.0517642
ILMN_2396947	-0.0517473
[truncated: 46,804 more rows]
