# Supplementary material for: The Discovery of Novel Biomarkers Improves Breast Cancer Intrinsic Subtype Prediction and Reconciles the Labels in the METABRIC Data Set
Source: PLoS One. 2015 Jul 1;10(7):e0129711. doi: 10.1371/journal.pone.0129711 (PMC4488510; doi:10.1371/journal.pone.0129711)
Supplement: S2 Table — Table describing the performance of each classifier on the METABRIC discovery and validation sets, and ROCK test set using the CM1 list. It shows the percentage of correctly, incorrectly and not classified samples, Fleiss Kappa index, Cramer’s V, Average Sensitivity, and other values for classification. The 24 classifiers from the Weka software suite are also listed. The labels predicted by each classifier for all samples using CM1 list are defined as: 1—luminal A, 2—luminal B, 3—HER2-enriched, 4—normal-like, 5—basal-like. Count of predicted labels was obtained with the consensus of the majority of classifiers. (XLSX) [file pone.0129711.s004.xlsx]

## Sheet: Legends
Sheet	Content
Perf METABRIC Discovery CM1	Performance of each classifier on the discovery and validation datasets, for the CM1 list. Columns are: pctCorrect, pctIncorrect, pctUnclassified: Percentage of correctly, incorrectly and not classified samples, respectively. kappa: Fleiss Kappa index. meanAbsoluteError, rootMeanSquaredError, relativeAbsoluteError, rootRelativeSquaredError: values for the classification. cramerV: Cramer's V avera…
Perf METABRIC Validation CM1
Perf ROCK CM1
Pred METABRIC Discovery CM1	Label predicted by each classifier for all samples in discovery and validation datasets, for CM1 list. 1: luminal A, 2: luminal B, 3: HER2-enriched, 4: normal-like, 5: basal-like.
Pred METABRIC Validation CM1
Pred ROCK CM1
Label METABRIC Discovery CM1	Count of predicted labels used to obtain the majority of classifiers predicted label, for the discovery and validation dataset, for the CM1 list. There are 24 classifiers in the Weka suite.
Label METABRIC Validation CM1
Label ROCK CM1

## Sheet: Perf METABRIC Discovery CM1
classifier	type	pctCorrect	pctIncorrect	pctUnclassified	kappa	meanAbsoluteError	rootMeanSquaredError	relativeAbsoluteError	rootRelativeSquaredError	cramerV	averageSensitivity
BayesNet	bayes	84.7543	15.2457	0	0.781845	0.0616558	0.231394	22.5046	62.5479	0.774466	0.835491
NaiveBayes	bayes	84.654	15.346	0	0.781444	0.0623164	0.233257	22.7458	63.0518	0.782705	0.842259
NaiveBayesUpdateable	bayes	84.3531	15.6469	0	0.777114	0.0637497	0.237147	23.2689	64.1035	0.772639	0.845304
Logistic	functions	83.1494	16.8506	0	0.754995	0.0690465	0.2475	25.2023	66.9018	0.707572	0.779392
MultilayerPerceptron	functions	87.2618	12.7382	0	0.812941	0.0537176	0.207021	19.6071	55.9597	0.779501	0.815941
SimpleLogistic	functions	88.666	11.334	0	0.833064	0.064056	0.183107	23.3807	49.4959	0.81234	0.84165
SMO	functions	87.8636	12.1364	0	0.820088	0.245657	0.324845	89.6659	87.809	0.795633	0.807006
IBk	lazy	78.7362	21.2638	0	0.686409	0.0863571	0.290841	31.5207	78.6175	0.682751	0.723351
KStar	lazy	79.2377	20.7623	0	0.685188	0.0838018	0.279782	30.588	75.6279	0.672587	0.68779
AttributeSelectedClassifier	meta	78.8365	21.1635	0	0.691664	0.0876506	0.281669	31.9928	76.1378	0.686399	0.716695
Bagging	meta	84.5537	15.4463	0	0.769496	0.0992709	0.21255	36.2343	57.4544	0.745309	0.76948
ClassificationViaRegression	meta	86.2588	13.7412	0	0.796274	0.0899005	0.206962	32.8141	55.9439	0.764287	0.7437
LogitBoost	meta	84.9549	15.0451	0	0.777823	0.0818036	0.210322	29.8587	56.8521	0.744636	0.769871
MultiClassClassifier	meta	84.1525	15.8475	0	0.764142	0.292689	0.366719	106.833	99.1282	0.722087	0.723135
RandomCommittee	meta	85.1555	14.8445	0	0.776998	0.0953661	0.210487	34.8091	56.8969	0.753881	0.775242
DecisionTable	rules	74.0221	25.9779	0	0.604494	0.16725	0.273149	61.0471	73.835	0.587166	0.634073
JRip	rules	78.9368	21.0632	0	0.68778	0.106037	0.26721	38.7042	72.2298	0.663773	0.696705
PART	rules	81.9458	18.0542	0	0.734932	0.0754862	0.264272	27.5529	71.4356	0.7246	0.75845
HoeffdingTree	trees	84.8546	15.1454	0	0.784441	0.062635	0.23474	22.8621	63.4527	0.78233	0.837862
J48	trees	80.341	19.659	0	0.712408	0.0814397	0.270006	29.7258	72.9852	0.697131	0.717809
LMT	trees	88.2648	11.7352	0	0.827044	0.0623027	0.182375	22.7408	49.2978	0.805494	0.833841
RandomForest	trees	84.8546	15.1454	0	0.772051	0.0992177	0.210344	36.2149	56.8583	0.753339	0.74435
RandomTree	trees	75.7272	24.2728	0	0.646299	0.0970913	0.311595	35.4388	84.2273	0.629718	0.675636
REPTree	trees	80.6419	19.3581	0	0.714018	0.103785	0.251039	37.8819	67.8586	0.703935	0.729651

## Sheet: Perf METABRIC Validation CM1
classifier	type	pctCorrect	pctIncorrect	pctUnclassified	kappa	meanAbsoluteError	rootMeanSquaredError	relativeAbsoluteError	rootRelativeSquaredError	cramerV	average sensitivity
BayesNet	bayes	72.1941	27.8059	0	0.644407	0.111165	0.320224	35.1454	80.5252	0.674634	0.692459
NaiveBayes	bayes	73.2053	26.7947	0	0.657772	0.108574	0.31816	34.3261	80.006	0.685765	0.703736
NaiveBayesUpdateable	bayes	73.2053	26.7947	0	0.657772	0.108574	0.31816	34.3261	80.006	0.685765	0.703736
Logistic	functions	70.273	29.727	0	0.617175	0.119191	0.335415	37.6828	84.3452	0.647073	0.659749
MultilayerPerceptron	functions	70.6775	29.3225	0	0.622128	0.116582	0.32643	36.8578	82.0858	0.655901	0.665001
SimpleLogistic	functions	70.5763	29.4237	0	0.621039	0.120873	0.299886	38.2144	75.4107	0.660542	0.66521
SMO	functions	70.1719	29.8281	0	0.615563	0.256663	0.34127	81.1453	85.8174	0.656211	0.660255
IBk	lazy	66.9363	33.0637	0	0.574089	0.133192	0.362766	42.1091	91.2228	0.620306	0.627844
KStar	lazy	61.274	38.726	0	0.498162	0.155368	0.387325	49.1202	97.3987	0.566229	0.566648
AttributeSelectedClassifier	meta	66.7341	33.2659	0	0.571803	0.134225	0.356321	42.4358	89.6022	0.614959	0.631259
Bagging	meta	68.0485	31.9515	0	0.586554	0.149647	0.31133	47.3116	78.2885	0.630418	0.632458
ClassificationViaRegression	meta	69.2619	30.7381	0	0.602997	0.138596	0.302347	43.8177	76.0296	0.649369	0.649646
LogitBoost	meta	68.453	31.547	0	0.593386	0.132411	0.308783	41.8624	77.648	0.631198	0.639348
MultiClassClassifier	meta	68.7563	31.2437	0	0.595961	0.297318	0.373073	93.9984	93.8148	0.628684	0.636839
RandomCommittee	meta	67.1385	32.8615	0	0.575185	0.143134	0.305904	45.2526	76.9242	0.625124	0.626233
DecisionTable	rules	60.7685	39.2315	0	0.491905	0.197444	0.329673	62.4228	82.9011	0.563838	0.556659
JRip	rules	66.7341	33.2659	0	0.570266	0.159609	0.346198	50.461	87.0566	0.603891	0.619279
PART	rules	65.723	34.277	0	0.559647	0.137739	0.367746	43.5469	92.4754	0.595837	0.617779
HoeffdingTree	trees	73.1041	26.8959	0	0.656466	0.108598	0.318164	34.3337	80.0072	0.684925	0.702843
J48	trees	65.8241	34.1759	0	0.560122	0.13748	0.362164	43.4651	91.0717	0.606566	0.622182
LMT	trees	70.5763	29.4237	0	0.621039	0.120873	0.299886	38.2144	75.4107	0.660542	0.66521
RandomForest	trees	65.723	34.277	0	0.556226	0.152073	0.310047	48.0785	77.9661	0.609053	0.610151
RandomTree	trees	64.004	35.996	0	0.535653	0.143984	0.379452	45.5211	95.4189	0.578497	0.59542
REPTree	trees	67.4419	32.5581	0	0.577946	0.147424	0.331267	46.6086	83.3021	0.625219	0.626641

## Sheet: Perf ROCK CM1
classifier	type	pctCorrect	pctIncorrect	pctUnclassified	kappa	meanAbsoluteError	rootMeanSquaredError	relativeAbsoluteError	rootRelativeSquaredError	cramerV	average sensitivity
BayesNet	bayes	74.586	25.414	0	0.654285	0.103155	0.30172	35.9612	79.6838	0.650776	0.769905
NaiveBayes	bayes	73.2484	26.7516	0	0.640528	0.106395	0.313577	37.0905	82.8153	0.64492	0.782333
NaiveBayesUpdateable	bayes	73.2484	26.7516	0	0.640528	0.106395	0.313577	37.0905	82.8153	0.64492	0.782333
Logistic	functions	68.8535	31.1465	0	0.579698	0.126555	0.33852	44.1186	89.4029	0.619217	0.752076
MultilayerPerceptron	functions	67.1338	32.8662	0	0.550233	0.131662	0.342539	45.899	90.4642	0.580057	0.646167
SimpleLogistic	functions	69.2994	30.7006	0	0.577521	0.12731	0.312681	44.3818	82.5787	0.593361	0.638735
SMO	functions	71.9745	28.0255	0	0.61471	0.256382	0.340648	89.3782	89.9647	0.617499	0.707871
IBk	lazy	67.1338	32.8662	0	0.548232	0.132406	0.361681	46.1584	95.5195	0.578638	0.688796
KStar	lazy	56.1783	43.8217	0	0.375242	0.174804	0.400954	60.9389	105.891	0.432802	0.462215
AttributeSelectedClassifier	meta	68.7898	31.2102	0	0.562466	0.1298	0.346583	45.25	91.5322	0.560962	0.677813
Bagging	meta	64.7134	35.2866	0	0.511127	0.167318	0.314304	58.3293	83.0073	0.544815	0.683024
ClassificationViaRegression	meta	65.2229	34.7771	0	0.515142	0.144408	0.333029	50.3427	87.9526	0.540591	0.661691
LogitBoost	meta	66.1783	33.8217	0	0.532624	0.144391	0.311651	50.3366	82.3067	0.56246	0.66037
MultiClassClassifier	meta	70.2548	29.7452	0	0.584252	0.293541	0.369083	102.332	97.4744	0.579237	0.639503
RandomCommittee	meta	68.2803	31.7197	0	0.562744	0.167439	0.302369	58.3716	79.8552	0.592041	0.727051
DecisionTable	rules	60.5732	39.4268	0	0.455953	0.190033	0.311921	66.2479	82.3781	0.519116	0.65444
JRip	rules	50.7643	49.2357	0	0.34462	0.19473	0.393439	67.8855	103.907	0.482358	0.619572
PART	rules	68.535	31.465	0	0.565096	0.130129	0.349669	45.3646	92.3471	0.582371	0.678978
HoeffdingTree	trees	73.6306	26.3694	0	0.645456	0.105531	0.312093	36.7895	82.4234	0.649764	0.786194
J48	trees	68.7261	31.2739	0	0.561463	0.130168	0.346968	45.3783	91.634	0.560377	0.677255
LMT	trees	69.2994	30.7006	0	0.577521	0.12731	0.312681	44.3818	82.5787	0.593361	0.638735
RandomForest	trees	66.6879	33.3121	0	0.533984	0.172739	0.3026	60.2191	79.9164	0.573139	0.66882
RandomTree	trees	48.9172	51.0828	0	0.310959	0.204331	0.45203	71.2326	119.381	0.434949	0.512254
REPTree	trees	59.4904	40.5096	0	0.42654	0.169428	0.37736	59.0649	99.6602	NA	0.633364

## Sheet: Pred METABRIC Discovery CM1
	Class	BayesNet	NaiveBayes	NaiveBayesUpdateable	Logistic	MultilayerPerceptron	SimpleLogistic	SMO	IBk	KStar	AttributeSelectedClassifier	Bagging	ClassificationViaRegression	LogitBoost	MultiClassClassifier	RandomCommittee	DecisionTable	JRip	PART	HoeffdingTree	J48	LMT	RandomForest	RandomTree	REPTree
MB-0362	1	1	1	1	1	1	1	1	1	1	1	1	1	1	1	1	2	2	1	1	2	1	1	2	2
MB-0346	3	3	3	3	3	3	3	3	3	2	3	3	3	3	3	3	3	3	3	3	3	3	3	3	3
MB-0386	1	1	1	1	2	2	1	1	2	2	1	2	2	1	1	1	2	1	1	1	1	1	2	2	1
MB-0574	1	1	1	1	1	1	1	1	1	1	2	1	1	1	1	1	2	1	2	1	1	1	1	1	1
MB-0185	2	2	2	2	2	2	2	2	2	2	2	2	2	2	2	2	2	2	2	2	2	2	2	2	2
MB-0503	1	1	1	1	1	1	1	1	1	1	1	1	1	1	1	1	1	1	2	1	1	1	1	1	1
MB-0641	4	4	4	4	4	4	4	4	4	1	1	4	4	4	4	4	1	4	1	4	4	4	1	4	4
MB-0201	3	3	3	3	5	5	5	3	3	3	5	5	3	3	5	3	3	3	3	3	5	3	3	3	5
MB-0218	2	2	2	2	2	2	2	2	2	2	2	2	2	2	2	2	2	2	2	2	2	2	2	2	2
MB-0316	5	5	5	5	4	5	5	5	5	5	5	5	5	5	5	5	5	5	5	5	5	5	5	5	5
MB-0189	1	4	4	4	1	4	4	1	1	1	1	1	1	1	1	4	3	1	1	4	1	4	1	1	1
MB-0891	1	1	1	1	1	1	1	1	1	1	1	1	1	1	1	1	1	1	1	1	1	1	1	1	1
MB-0658	5	5	5	5	5	5	5	5	5	5	5	5	5	5	5	5	5	5	5	5	5	5	5	5	5
MB-0899	1	1	1	1	1	1	1	1	1	1	1	1	1	1	1	1	1	1	1	1	1	1	1	1	1
MB-0605	1	1	1	1	1	1	1	1	1	1	1	1	1	1	1	1	1	1	1	1	1	1	1	1	1
MB-0258	1	1	1	1	1	1	1	1	1	1	2	1	1	1	1	1	1	1	1	1	1	1	1	1	1
MB-0506	3	3	3	3	3	3	3	3	5	2	3	3	3	3	5	3	3	3	5	3	3	3	3	5	3
MB-0420	5	5	5	5	5	5	5	5	5	5	5	5	5	5	5	5	5	5	5	5	5	5	5	5	5
MB-0223	1	1	1	1	1	1	1	1	1	1	4	1	1	1	1	1	1	1	4	1	1	1	1	4	1
MB-0445	1	1	1	1	1	1	1	1	1	1	1	1	1	1	1	1	1	1	1	1	1	1	1	1	1
MB-0199	1	1	1	1	1	1	1	1	1	1	1	1	1	1	1	1	1	1	1	1	1	1	1	1	1
MB-0517	1	1	1	1	1	1	1	1	1	1	1	1	1	1	1	1	1	1	1	1	1	1	1	1	1
MB-0155	4	4	4	4	4	4	4	4	1	1	1	1	4	4	1	1	1	4	4	4	1	4	4	1	1
MB-0428	1	1	1	1	1	1	1	1	1	1	1	1	1	1	1	1	1	1	1	1	1	1	1	1	1
MB-0117	1	1	1	1	1	1	1	1	1	1	1	1	1	1	1	1	1	1	1	1	1	1	1	1	1
MB-0906	3	3	3	3	4	5	4	3	3	3	4	5	3	3	5	3	3	3	3	3	5	4	4	4	5
MB-0249	3	3	3	3	3	3	3	3	3	3	5	3	3	3	3	3	5	3	5	3	3	3	5	5	3
MB-0660	3	3	3	3	3	3	3	3	3	3	3	3	3	3	5	3	3	3	3	3	3	3	3	4	5
MB-0497	1	1	1	1	1	1	1	1	1	2	1	1	1	1	1	1	1	1	1	1	1	1	1	1	1
MB-0434	2	2	2	2	2	2	2	2	2	2	2	2	2	2	2	2	1	2	2	2	2	2	2	2	2
MB-0143	1	1	1	1	2	1	1	1	1	2	1	1	1	1	1	1	1	1	1	1	1	1	1	1	2
MB-0513	1	1	2	2	1	1	1	1	2	1	1	1	1	1	1	1	1	1	2	2	2	1	1	2	1
MB-0541	2	2	2	2	1	2	2	1	1	1	2	2	2	1	1	1	2	1	2	2	1	2	1	1	2
MB-0653	3	3	3	3	3	2	2	3	3	2	3	3	3	2	2	3	1	2	1	3	3	2	3	2	3
MB-0455	2	2	2	2	2	2	2	2	2	2	2	2	2	2	2	2	2	2	2	2	2	2	2	2	2
MB-0540	4	4	4	4	5	4	4	5	5	4	1	4	3	5	4	4	1	1	4	4	4	4	4	4	4
MB-0384	INC	2	2	2	1	1	2	1	1	1	2	2	1	2	2	1	2	1	2	2	1	1	1	2	1
MB-0637	2	2	2	2	2	2	2	2	2	2	2	2	2	2	2	2	2	2	2	2	2	2	2	2	2
MB-0157	5	5	5	5	5	5	5	5	5	5	5	5	5	5	5	5	3	5	5	5	5	5	5	5	5
MB-0443	1	1	1	1	1	1	1	1	2	2	1	1	1	1	2	2	1	2	1	1	1	1	2	2	2
MB-0584	2	2	2	2	2	2	2	2	2	2	2	2	2	2	2	2	2	2	2	2	2	2	2	2	2
MB-0292	3	3	3	3	3	3	3	3	3	3	3	3	3	3	5	3	3	3	3	3	3	3	3	3	3
MB-0322	1	1	1	1	1	1	1	1	1	1	1	1	1	1	1	1	1	3	1	1	1	1	1	1	1
MB-0501	1	1	1	1	1	1	1	1	1	1	1	1	1	1	1	1	1	1	1	1	1	1	1	1	1
MB-0401	5	5	5	5	5	5	5	5	5	5	5	5	5	5	5	5	5	5	5	5	5	5	5	5	5
MB-0140	1	1	1	1	2	1	1	1	1	2	1	1	2	1	2	1	1	1	1	1	2	1	1	1	1
MB-0606	2	2	2	2	2	2	2	2	1	1	2	2	2	2	2	2	1	2	2	2	2	2	2	2	2
MB-0666	2	2	2	2	2	2	2	2	2	1	2	2	2	1	2	1	2	1	1	2	1	2	2	1	2
MB-0598	2	2	2	2	2	2	2	2	2	2	2	2	2	2	2	2	1	1	2	2	1	1	2	1	2
MB-0453	3	3	3	3	3	3	3	3	2	2	1	3	3	3	2	3	3	2	1	3	3	3	2	1	3
MB-0138	1	1	1	1	1	1	1	1	1	1	1	1	1	1	1	1	1	1	1	1	1	1	1	1	1
MB-0579	2	2	2	2	2	2	2	2	1	1	1	1	2	2	1	1	1	2	2	2	2	2	2	1	2
MB-0405	2	2	2	2	2	2	2	2	1	2	2	2	2	2	2	2	2	2	2	2	2	2	2	2	2
MB-0471	2	2	2	2	2	2	2	2	2	2	1	1	1	2	1	1	1	2	2	2	2	2	1	1	2
MB-0347	3	3	3	3	2	3	3	3	3	2	2	3	5	3	3	2	2	5	5	3	2	3	2	2	3
MB-0619	1	1	1	1	1	1	1	1	4	1	1	1	1	1	1	1	1	1	1	1	1	1	1	1	1
MB-0171	4	4	4	4	4	1	4	4	4	1	1	4	1	4	1	4	1	1	4	4	4	4	1	1	4
MB-0310	1	1	1	1	1	1	1	1	1	1	1	1	1	1	1	1	1	1	1	1	1	1	1	1	1
MB-0621	1	4	4	4	4	1	1	1	1	4	1	1	1	1	1	1	1	1	1	4	1	1	1	4	4
MB-0614	2	1	2	2	2	2	2	1	2	1	1	2	1	2	1	2	1	1	1	2	2	2	2	1	2
MB-0372	5	5	5	5	5	5	5	5	5	5	5	5	5	5	5	5	5	5	5	5	5	5	5	5	5
MB-0374	2	2	2	2	2	2	2	2	2	2	2	2	2	2	2	2	2	1	2	2	1	2	2	3	2
MB-0382	1	1	1	4	1	1	1	1	1	1	1	1	1	1	1	1	1	1	4	4	1	1	1	1	1
MB-0327	1	1	1	1	1	1	1	1	1	1	1	1	1	1	1	1	1	1	1	1	1	1	1	1	1
MB-0066	2	2	2	2	2	2	2	2	2	2	2	2	2	2	2	1	2	2	2	2	1	2	2	2	2
MB-0144	1	1	1	1	2	1	1	1	1	1	1	1	1	1	1	1	1	1	1	1	1	1	1	2	2
MB-0596	1	1	1	1	1	1	1	1	1	1	1	1	1	1	1	1	1	1	1	1	1	1	1	1	1
MB-0164	5	5	5	5	5	5	5	5	5	5	5	5	5	5	5	5	5	5	5	5	5	5	5	5	5
MB-0215	2	2	2	2	2	1	1	2	2	1	2	1	2	1	2	2	2	2	1	2	1	2	1	2	1
MB-0146	2	2	2	2	2	2	2	2	2	2	1	2	2	2	2	2	1	2	2	2	1	2	2	2	2
MB-0229	1	1	1	1	1	1	1	1	1	1	1	1	1	2	1	1	2	1	1	1	2	1	1	1	1
MB-0505	1	1	1	1	1	1	1	1	1	1	1	1	1	1	1	1	1	1	1	1	1	1	1	1	1
MB-0102	2	2	2	2	2	2	2	2	1	2	2	2	2	2	2	2	1	2	2	2	2	2	2	2	2
MB-0569	2	2	2	2	2	2	2	2	2	2	2	2	2	2	2	2	2	2	2	2	2	2	2	2	2
MB-0516	5	5	5	5	5	5	5	5	5	5	5	5	5	5	5	5	5	5	5	5	5	5	5	5	5
MB-0272	2	2	2	2	2	2	2	2	2	2	2	2	2	2	2	2	2	2	2	2	2	2	2	2	2
MB-0585	2	2	2	2	2	2	2	2	1	1	2	1	2	1	2	1	1	1	2	2	2	2	1	2	2
MB-0494	3	3	3	3	3	3	3	3	5	5	3	5	3	3	5	5	3	3	5	3	5	3	3	5	3
MB-0306	1	1	1	1	2	1	1	1	1	1	1	1	1	1	1	1	2	2	2	1	1	1	1	1	1
MB-0463	1	1	1	1	1	1	1	1	1	1	1	1	1	1	1	1	1	1	1	1	1	1	1	1	1
MB-0198	2	2	2	2	2	2	2	2	2	2	2	2	2	2	2	2	2	2	2	2	2	2	2	2	2
MB-0203	1	1	1	1	1	1	1	1	1	1	1	1	1	1	1	1	1	2	1	1	1	1	1	1	1
MB-0607	1	1	1	1	4	1	1	1	1	1	1	1	1	1	1	1	1	1	1	1	1	1	1	4	1
MB-0631	1	1	1	1	1	1	1	1	1	1	1	1	1	1	1	1	1	1	2	1	1	1	1	1	1
MB-0363	2	2	2	2	2	2	2	2	2	2	2	2	2	2	2	2	2	2	2	2	2	2	2	2	2
MB-0427	INC	1	1	1	1	2	2	1	2	2	2	2	1	2	2	2	1	1	1	1	2	2	1	3	2
MB-0519	4	4	4	4	4	4	4	4	4	4	4	4	1	4	4	4	1	4	4	4	4	4	1	4	1
MB-0371	INC	2	1	1	2	2	2	2	2	2	1	1	1	2	2	1	1	5	2	1	1	2	1	2	3
MB-0380	2	2	2	2	2	2	2	2	2	2	2	2	2	2	2	2	2	2	2	2	2	2	2	2	2
MB-0221	3	3	3	3	3	3	3	3	3	3	3	3	3	3	3	3	3	2	3	3	3	3	3	1	3
MB-0348	1	1	1	1	1	1	1	1	1	1	1	1	1	1	1	1	1	1	1	1	1	1	1	1	1
MB-0261	2	1	2	2	2	2	2	1	1	1	2	1	1	1	2	1	2	2	1	2	1	2	2	2	2
MB-0576	2	2	2	2	2	2	2	2	2	2	2	2	2	2	2	2	1	2	3	2	1	2	2	2	1
MB-0385	2	2	2	2	2	2	2	2	2	2	1	2	1	2	2	2	1	2	1	2	2	2	1	2	1
MB-0659	INC	4	5	5	5	4	5	4	4	4	4	5	5	5	4	4	1	5	1	5	4	5	4	4	5
MB-0270	2	2	2	2	2	2	2	2	2	2	2	2	2	2	2	2	2	2	2	2	2	2	2	3	2
MB-0379	1	1	1	1	1	1	1	1	1	1	1	1	1	1	1	1	1	1	1	1	1	1	1	1	1
MB-0432	INC	4	4	4	4	5	5	5	5	5	5	3	3	1	5	5	3	1	3	4	5	5	4	5	3
MB-0527	1	1	1	1	1	1	1	1	1	1	1	1	1	1	1	1	1	1	1	1	1	1	1	1	1
MB-0624	1	4	4	4	1	1	1	1	1	1	1	1	4	1	1	1	1	1	1	4	1	1	1	1	1
MB-0273	1	1	1	1	1	1	1	1	1	1	1	1	1	1	1	1	1	1	1	1	1	1	1	1	1
MB-0050	4	4	4	4	4	4	4	4	4	4	4	1	4	4	1	1	4	1	4	4	4	1	1	1	1
MB-0460	1	4	4	4	1	1	4	1	4	1	1	1	4	4	1	4	1	4	1	4	1	4	1	1	1
MB-0654	1	1	1	1	1	1	1	1	2	1	1	1	1	1	1	1	1	1	1	1	1	1	1	1	1
MB-0454	1	1	1	1	1	1	1	1	1	2	2	1	1	1	1	1	1	1	1	1	1	1	1	1	1
MB-0392	4	4	4	4	4	4	4	4	1	4	3	1	1	4	4	1	1	1	4	4	2	4	4	4	1
MB-0336	2	2	2	2	2	2	2	2	2	2	2	2	2	2	2	2	2	2	2	2	2	2	2	2	2
MB-0467	3	3	3	3	3	3	3	3	3	3	3	3	3	3	3	3	3	3	3	3	3	3	3	5	3
MB-0349	2	2	2	2	2	2	2	2	2	1	2	1	2	2	2	1	2	2	2	2	1	2	2	2	2
MB-0378	3	3	3	3	3	3	3	3	3	3	3	3	3	3	3	3	3	3	3	3	3	3	3	3	3
MB-0176	1	1	4	4	4	1	1	1	1	1	1	1	1	4	1	1	1	1	1	4	4	1	1	4	1
MB-0429	2	2	2	2	2	2	2	2	2	2	2	2	2	2	2	2	1	2	2	2	2	2	2	2	2
MB-0397	1	1	1	1	1	1	1	1	1	1	1	1	1	1	1	1	1	1	1	1	1	1	1	1	1
MB-0571	1	2	2	2	1	1	1	1	1	1	1	2	1	2	1	2	2	1	2	2	1	1	1	2	1
MB-0426	1	4	4	4	1	1	1	1	1	1	1	4	1	1	1	1	4	1	4	4	4	1	1	1	1
MB-0135	2	2	2	2	2	2	2	2	2	2	2	2	2	2	2	2	2	2	2	2	2	2	2	2	2
MB-0112	1	1	1	1	1	1	1	1	1	1	1	1	1	1	1	1	1	1	1	1	1	1	1	1	1
MB-0352	3	3	3	3	1	3	3	3	5	4	1	3	1	3	3	4	4	3	4	3	4	3	4	3	3
MB-0644	1	4	1	1	1	1	1	1	1	1	1	1	1	1	1	1	1	4	1	1	1	1	1	4	4
MB-0601	2	2	2	2	3	2	2	2	2	2	2	2	2	2	2	2	2	2	2	2	2	2	2	2	2
MB-0568	1	1	1	1	1	1	1	1	1	1	1	1	1	1	1	1	1	1	1	1	1	1	1	1	1
MB-0328	2	2	2	2	2	2	2	2	2	2	2	2	2	2	2	2	2	2	2	2	2	2	2	2	2
MB-0325	2	2	2	2	2	2	2	2	2	2	2	2	2	2	2	2	2	3	2	2	2	2	2	2	2
MB-0358	1	4	4	4	1	1	1	1	1	1	1	1	1	1	1	1	1	1	2	4	1	1	1	2	1
MB-0413	1	1	1	1	1	1	1	1	1	2	2	1	1	1	1	1	2	1	1	1	1	1	1	2	1
MB-0158	3	3	3	3	5	3	3	3	3	3	5	3	3	3	3	3	5	5	3	3	3	3	3	3	3
MB-0636	1	1	1	1	1	1	1	1	1	1	1	1	1	1	2	1	2	1	1	1	1	1	1	2	2
MB-0145	1	1	4	1	1	1	1	1	1	1	1	1	1	1	1	1	1	1	1	1	1	1	1	1	1
MB-0195	2	2	2	2	2	2	2	2	2	2	2	2	2	2	2	2	2	2	2	2	2	2	2	2	2
MB-0422	1	1	1	1	1	1	1	1	1	1	1	1	1	1	1	1	1	1	1	1	1	1	1	1	2
MB-0483	2	2	2	2	2	2	2	2	1	1	1	1	2	1	2	1	1	1	1	2	2	2	1	2	2
MB-0317	1	1	1	1	1	1	1	1	1	1	1	1	1	1	1	1	1	1	1	1	1	1	1	1	1
MB-0486	1	1	1	1	1	1	1	1	1	1	1	1	1	1	1	1	1	1	1	1	2	1	1	1	1
MB-0139	1	4	4	4	4	1	4	4	1	1	1	1	1	4	1	1	1	4	1	4	1	4	1	4	1
MB-0257	1	1	1	1	2	1	1	1	2	2	1	1	1	1	1	1	1	1	1	1	1	1	1	1	2
MB-0345	1	1	1	1	1	1	1	1	1	1	1	1	1	1	1	1	1	1	1	1	1	1	1	1	1
MB-0375	INC	4	4	4	5	5	4	5	5	1	4	1	1	5	5	4	1	4	4	4	4	4	4	5	1
MB-0419	1	1	1	1	1	1	1	1	1	1	1	1	1	1	1	1	1	1	1	1	1	1	1	1	1
MB-0480	1	1	1	1	1	1	1	1	1	1	1	1	1	1	1	1	1	1	1	1	1	1	1	1	1
MB-0311	2	2	2	2	2	2	2	2	2	2	2	2	2	2	2	2	2	2	2	2	2	2	2	2	2
MB-0324	2	2	2	2	2	2	2	1	2	1	1	1	1	2	2	1	2	2	1	2	2	2	1	1	1
MB-0368	2	2	2	2	2	2	2	2	2	2	2	2	2	2	2	2	2	2	2	2	2	2	2	2	2
MB-0389	2	2	2	2	2	2	2	2	2	2	2	2	2	2	2	2	2	2	2	2	2	2	2	2	2
MB-0248	1	1	1	1	1	1	1	1	1	1	2	1	1	1	1	1	1	2	1	1	2	1	1	1	1
MB-0035	INC	3	3	3	2	3	3	3	3	2	1	3	1	2	3	2	1	2	1	3	5	3	2	2	3
MB-0667	2	2	2	2	2	2	2	2	2	2	2	2	2	2	2	2	2	2	2	2	2	2	2	2	2
MB-0423	1	4	1	1	1	1	1	1	1	1	1	1	1	1	1	1	1	4	1	1	1	1	1	1	1
MB-0904	1	1	1	1	1	1	1	1	1	1	1	1	1	1	1	1	1	1	1	1	1	1	1	1	1
MB-0119	2	2	2	2	2	2	2	2	1	1	1	2	2	2	2	2	1	2	2	2	2	2	2	2	2
MB-0650	1	1	1	1	1	1	1	1	1	1	1	1	1	1	2	1	1	1	1	1	1	1	1	1	1
MB-0204	1	1	1	1	1	1	1	1	1	1	1	1	1	1	1	1	1	1	1	1	1	1	1	1	1
MB-0184	1	1	1	1	1	1	1	1	2	1	1	1	1	1	1	1	1	1	1	1	1	1	1	1	1
MB-0600	2	2	2	2	2	2	2	2	2	1	1	1	1	2	2	2	1	1	2	2	1	2	1	2	1
MB-0400	5	5	5	5	5	5	5	5	5	5	5	5	5	5	5	5	3	3	5	5	5	5	5	5	5
MB-0511	1	1	1	1	1	1	1	1	1	1	1	1	1	1	1	1	1	1	1	1	1	1	1	1	1
MB-0059	2	1	2	2	2	1	2	1	2	2	2	2	1	1	2	1	1	1	1	2	1	2	2	2	2
MB-0500	5	5	5	5	5	5	5	5	5	5	5	5	5	5	5	5	5	5	5	5	5	5	5	5	5
MB-0150	5	5	5	5	5	5	5	5	5	5	5	5	5	5	5	5	1	5	5	5	5	5	5	5	5
MB-0895	2	2	2	2	2	2	2	2	2	1	2	2	2	2	2	2	2	1	2	2	2	2	1	2	2
MB-0366	1	1	1	1	1	1	1	1	1	1	1	1	1	1	1	1	1	1	1	1	2	1	1	1	1
MB-0173	2	2	2	2	2	2	2	2	2	2	2	2	2	2	2	2	2	2	2	2	2	2	2	2	2
MB-0131	1	1	1	1	1	1	1	1	1	1	1	1	1	1	1	1	1	1	1	1	1	1	1	1	1
MB-0206	5	5	5	5	5	5	5	5	5	5	5	5	5	5	5	5	5	5	5	5	5	5	5	5	5
MB-0315	1	1	1	1	1	1	1	1	1	1	1	1	1	1	1	1	1	1	1	1	1	1	1	1	1
MB-0361	3	3	3	3	5	3	3	3	3	3	3	3	3	3	5	3	5	3	3	3	3	3	3	3	3
MB-0545	4	4	4	4	4	4	4	4	1	4	4	1	1	4	4	2	1	1	4	4	1	4	2	4	2
MB-0370	2	2	2	2	2	2	2	2	2	2	2	2	2	2	2	2	2	2	2	2	2	2	2	1	2
MB-0642	1	1	1	1	1	1	1	1	1	1	1	1	1	1	1	1	1	1	1	1	1	1	1	1	1
MB-0431	1	1	1	1	1	1	1	1	1	1	1	1	1	1	1	1	1	1	1	1	1	1	1	1	1
MB-0181	1	1	1	1	1	1	1	1	1	1	1	1	1	1	1	1	1	1	1	1	1	1	1	4	1
MB-0603	1	1	1	1	1	1	1	1	1	1	1	1	1	1	1	1	1	1	1	1	1	1	1	1	1
MB-0295	1	1	1	1	1	1	1	1	1	1	1	1	1	1	1	1	1	1	1	1	1	1	1	1	1
MB-0618	1	1	2	2	1	1	1	1	1	2	1	1	1	1	1	1	2	1	1	2	1	1	1	1	1
MB-0496	4	4	4	4	1	1	4	4	4	1	1	1	1	4	1	4	1	1	4	4	4	4	1	1	4
MB-0411	1	1	1	1	1	1	1	1	1	1	1	1	1	1	1	1	1	1	1	1	1	1	1	1	1
MB-0285	4	4	4	4	4	4	4	4	1	1	4	1	1	4	1	4	4	4	1	4	1	4	4	4	1
MB-0360	2	2	2	2	2	2	2	2	2	2	2	2	2	2	2	2	2	2	2	2	2	2	2	2	2
MB-0359	1	1	1	1	1	1	1	1	4	1	1	1	1	1	1	1	1	1	1	1	4	1	1	1	4
MB-0344	4	4	4	4	4	4	4	4	1	1	4	4	4	4	1	4	4	1	1	4	1	4	4	1	1
MB-0583	1	1	1	1	1	1	1	1	1	1	1	1	1	1	1	1	1	1	1	1	1	1	1	1	1
MB-0202	1	2	1	1	2	1	1	1	1	1	2	1	2	1	2	1	2	1	1	1	1	1	2	1	1
MB-0485	1	1	1	1	1	1	1	1	1	1	1	1	1	1	1	1	1	1	4	1	1	1	1	4	1
MB-0609	1	1	1	1	1	1	1	1	1	1	1	1	1	1	1	1	2	1	1	1	1	1	1	1	1
MB-0538	1	1	1	1	1	1	1	1	1	1	1	1	1	1	1	1	1	1	1	1	1	1	1	1	1
MB-0197	2	2	2	2	2	2	2	2	2	1	2	2	2	2	2	2	2	2	2	2	2	2	2	1	1
MB-0410	1	1	1	1	1	1	1	1	1	1	1	1	1	1	1	1	1	1	1	1	1	1	1	4	1
MB-0528	1	1	1	1	1	1	1	1	1	1	1	1	1	1	1	1	1	1	1	1	1	1	1	1	1
MB-0165	INC	3	3	3	1	1	1	1	3	3	2	1	3	3	1	1	1	1	1	3	2	4	1	2	1
MB-0152	3	3	3	3	3	3	3	3	3	3	4	3	3	3	3	3	3	3	3	3	3	3	3	3	3
MB-0546	1	4	4	4	1	1	1	1	1	1	1	1	1	1	1	1	1	1	1	4	1	1	1	1	1
MB-0148	3	3	3	3	3	3	5	3	3	3	3	3	3	3	3	3	5	3	2	3	3	5	3	3	3
MB-0594	1	1	1	2	1	1	1	2	1	2	1	1	1	2	2	1	1	2	1	1	1	1	1	1	2
MB-0521	1	4	4	4	1	1	1	4	4	1	4	1	1	1	1	1	1	1	4	4	4	1	1	1	1
MB-0532	2	2	2	2	2	2	2	2	2	2	2	2	2	2	2	2	2	2	2	2	2	2	2	3	2
MB-0536	2	2	2	2	5	2	2	2	2	2	2	2	2	2	2	2	2	2	2	2	2	2	2	2	2
MB-0319	2	2	2	2	2	2	2	2	2	2	2	2	2	2	2	2	2	2	2	2	2	2	2	1	2
MB-0491	1	1	1	1	1	1	1	1	1	1	1	1	1	1	1	1	2	1	1	1	1	1	1	1	1
MB-0404	1	1	1	1	1	1	1	1	1	1	1	1	1	1	1	1	1	2	1	1	1	1	1	1	1
MB-0243	1	1	1	1	1	1	1	1	1	1	1	1	1	1	1	1	1	1	1	1	1	1	1	1	2
MB-0580	1	1	1	1	1	1	1	1	1	1	2	1	1	1	1	1	1	2	1	1	1	1	1	2	1
MB-0312	2	2	2	2	2	2	2	2	2	2	2	2	2	2	2	2	2	2	2	2	2	2	2	2	2
MB-0060	2	3	2	2	2	2	2	2	2	2	3	3	3	2	2	2	1	2	5	2	2	2	3	2	3
MB-0635	4	4	4	4	5	4	4	4	4	4	4	3	4	4	4	4	4	1	5	4	4	4	4	4	3
MB-0649	1	1	1	1	1	1	1	1	1	1	1	1	1	1	1	1	1	1	1	1	1	1	1	1	1
MB-0643	3	3	3	3	3	3	3	3	3	3	3	3	3	3	5	3	3	3	3	3	3	3	5	3	3
MB-0581	3	3	3	3	3	3	3	3	5	3	3	3	3	3	3	5	5	3	3	3	3	3	3	5	3
MB-0383	2	2	2	2	2	2	2	2	2	2	2	2	2	2	2	1	1	2	2	2	1	2	1	2	1
MB-0142	1	1	1	1	1	1	1	1	1	1	1	1	1	1	1	1	1	1	1	1	1	1	1	1	1
MB-0320	1	4	4	4	4	1	1	1	4	1	1	1	1	1	1	1	1	1	1	1	1	1	1	4	1
MB-0207	1	1	1	1	1	1	1	1	1	1	1	1	1	1	1	1	1	1	1	1	1	1	1	1	1
MB-0167	2	2	2	2	2	2	2	2	2	2	2	2	2	2	2	2	2	2	2	2	2	2	2	3	2
MB-0591	2	2	2	2	2	2	2	2	1	1	2	2	2	2	2	2	1	2	2	2	1	2	2	2	2
MB-0613	5	3	5	5	4	5	5	3	3	3	5	5	5	5	5	3	3	3	5	5	3	3	5	5	5
MB-0313	2	2	2	2	2	2	2	2	2	2	2	2	2	2	2	2	2	2	2	2	2	2	2	2	2
MB-0599	1	1	1	1	1	1	1	1	1	1	1	3	1	1	1	1	4	1	1	1	1	1	1	1	3
MB-0286	1	4	4	4	1	1	1	1	1	1	1	1	1	1	1	1	1	1	1	4	4	1	1	1	1
MB-0575	1	1	1	1	1	1	1	1	1	1	1	1	1	1	1	1	1	1	1	1	1	1	1	1	1
MB-0549	2	2	2	2	2	2	2	2	2	2	2	2	2	1	2	2	2	2	2	2	2	2	2	2	2
MB-0214	5	5	5	5	5	5	5	5	5	2	5	5	5	5	5	5	5	5	5	5	5	5	5	3	5
MB-0589	1	1	1	1	1	1	1	2	1	1	2	2	1	1	2	1	1	1	1	1	1	1	2	1	2
MB-0406	2	2	2	2	2	2	2	2	2	2	2	2	2	2	2	2	2	2	2	2	2	2	2	2	2
MB-0452	2	2	2	2	2	2	2	2	1	1	2	2	2	2	2	2	2	2	2	2	2	2	2	2	2
MB-0524	1	4	4	4	4	1	1	1	1	1	4	4	1	4	1	1	4	1	4	4	1	1	1	1	4
MB-0880	1	1	1	1	1	1	1	1	1	1	1	1	1	1	1	1	1	1	1	1	1	1	1	1	1
MB-0573	1	1	1	1	1	1	1	1	1	1	1	1	1	1	1	1	1	1	2	1	1	1	1	1	1
MB-0664	5	5	5	5	5	5	5	5	5	5	5	5	5	5	5	5	5	5	5	5	5	5	5	5	5
MB-0446	5	5	5	5	5	5	5	5	5	5	5	5	5	5	5	5	5	5	5	5	5	5	5	5	5
MB-0008	2	2	2	2	2	2	2	2	2	2	2	2	2	2	2	2	2	2	1	2	2	2	2	3	2
MB-0656	5	5	5	5	5	5	5	5	5	5	5	5	5	5	5	5	5	4	5	5	5	5	5	5	5
MB-0154	1	1	1	1	1	1	1	1	1	1	1	1	1	1	1	1	1	1	1	1	1	1	1	1	1
MB-0597	4	4	4	4	4	4	4	4	4	4	4	1	1	4	4	1	1	4	4	4	1	4	1	1	4
MB-0550	2	2	2	2	2	2	2	2	2	2	2	2	2	2	2	2	2	2	2	2	2	2	2	2	2
MB-0616	2	2	2	2	2	2	2	2	2	2	2	2	2	2	2	2	1	2	2	2	2	2	2	2	2
MB-0448	2	2	2	2	2	2	2	1	2	2	2	1	1	2	1	2	1	1	1	2	2	2	1	2	2
MB-0412	2	2	2	2	2	2	2	2	2	2	2	2	2	2	2	2	2	2	2	2	2	2	2	2	2
MB-0122	1	1	1	1	1	1	1	1	1	1	1	1	1	1	1	1	1	1	1	1	1	1	1	1	1
MB-0425	1	1	1	1	1	1	1	1	1	1	1	1	1	1	1	1	1	1	1	1	1	1	1	1	1
MB-0314	3	3	3	3	3	3	3	3	3	3	3	3	3	3	3	3	3	3	3	3	3	3	3	3	3
MB-0356	1	1	1	1	1	1	1	1	1	1	1	1	1	1	1	1	2	2	1	1	1	1	1	1	1
MB-0440	2	2	2	2	2	2	2	2	2	2	2	2	2	2	2	2	2	2	2	2	2	2	2	2	2
MB-0398	2	2	2	2	2	2	2	2	2	2	2	2	2	1	1	2	2	2	2	2	1	2	2	2	2
MB-0438	3	3	3	3	3	3	3	3	3	3	3	3	3	3	3	3	1	3	3	3	3	3	3	3	3
MB-0449	1	1	1	1	1	1	1	1	1	1	1	1	1	1	1	1	1	1	1	1	1	1	1	1	1
MB-0162	1	1	1	1	1	1	1	1	1	1	1	1	1	1	1	1	1	1	1	1	1	1	1	1	1
MB-0593	5	5	5	5	4	5	5	5	5	5	4	5	5	4	4	5	3	1	5	5	3	5	5	5	3
MB-0301	1	1	1	1	1	1	1	1	1	1	1	1	1	1	1	1	1	1	1	1	1	1	1	1	1
MB-0628	1	1	4	4	4	1	1	1	1	1	4	1	1	1	1	1	1	1	1	4	1	1	1	1	1
MB-0283	2	2	2	2	2	2	2	2	2	2	2	2	2	2	2	2	1	2	2	2	2	2	2	3	2
MB-0106	1	1	1	1	1	1	1	1	1	1	1	1	1	1	1	1	1	1	1	1	1	1	1	1	1
MB-0341	1	1	1	1	1	1	1	1	1	1	1	1	1	1	1	1	1	1	4	1	1	1	1	1	1
MB-0474	2	2	2	2	2	2	2	2	2	1	2	2	2	2	2	2	2	2	2	2	2	2	2	2	2
MB-0394	1	1	1	1	1	1	1	1	2	1	1	1	1	1	1	1	1	1	1	1	1	1	1	1	1
MB-0373	2	2	2	2	2	2	2	2	2	2	2	2	3	2	2	2	2	2	1	2	2	2	2	2	2
MB-0247	1	4	1	1	1	1	1	1	1	1	1	1	1	1	1	1	1	1	4	1	1	1	1	1	1
MB-0225	2	2	2	2	2	2	2	2	2	2	2	2	2	2	2	2	3	2	1	2	2	2	2	2	2
MB-0424	4	4	4	4	5	4	4	4	4	4	4	4	4	4	5	4	4	4	4	4	4	4	4	4	4
MB-0209	4	4	4	4	4	4	4	4	5	1	4	4	4	5	4	4	1	4	4	4	4	4	4	4	1
MB-0115	5	5	5	5	5	5	5	5	5	5	5	5	5	5	5	5	5	5	5	5	5	5	5	5	5
MB-0136	1	1	1	1	1	1	1	1	1	1	1	1	1	1	1	1	1	1	1	1	1	1	1	1	1
MB-0542	1	4	4	4	4	4	4	1	1	1	1	1	1	1	1	1	1	1	1	4	1	1	1	1	1
MB-0354	INC	3	3	3	5	5	5	3	1	1	3	3	4	3	1	5	3	5	4	3	5	5	5	4	3
MB-0151	1	1	1	1	1	1	1	1	1	1	2	1	1	2	1	2	1	2	1	1	1	1	1	2	2
MB-0590	2	2	2	2	2	2	2	2	2	2	2	2	2	2	2	2	2	2	2	2	2	2	2	2	2
MB-0608	5	5	5	5	5	5	5	5	5	5	5	5	5	5	5	5	5	5	5	5	5	5	5	5	5
MB-0657	4	4	4	4	4	4	4	4	4	4	4	4	4	4	4	4	1	4	4	4	1	4	1	1	4
MB-0559	1	1	1	1	1	1	1	1	2	1	1	1	1	1	1	1	1	1	1	1	1	1	1	2	1
MB-0893	4	4	4	4	4	5	4	4	4	5	4	3	4	4	5	4	1	5	5	4	3	4	4	3	3
MB-0514	2	2	2	2	2	2	2	2	2	1	2	2	2	2	2	2	2	2	2	2	2	2	2	2	2
MB-0395	3	3	3	3	3	3	3	3	3	3	3	3	3	3	3	3	3	3	4	3	3	3	3	4	3
MB-0294	INC	4	4	4	5	1	4	1	1	3	1	4	1	1	1	1	4	1	4	4	1	4	1	1	4
MB-0439	2	2	2	2	2	2	2	2	2	2	2	2	2	2	2	2	2	2	2	2	2	2	2	2	2
MB-0481	5	5	5	5	5	5	5	5	5	5	5	5	5	5	5	5	5	5	5	5	5	5	5	5	5
MB-0529	1	1	1	1	1	1	1	1	1	1	1	1	1	1	1	1	1	1	1	1	1	1	1	1	1
MB-0224	1	1	1	1	1	1	1	1	1	1	1	1	1	1	1	1	1	1	1	1	1	1	1	1	1
MB-0302	1	4	4	4	4	1	1	1	1	1	1	1	1	4	1	1	1	1	1	4	1	1	1	1	4
MB-0126	1	1	1	1	1	1	1	1	1	1	1	1	1	1	2	1	1	2	1	1	1	1	1	1	1
MB-0220	4	4	4	4	4	4	4	4	4	4	4	4	4	4	4	4	3	4	4	4	4	4	4	1	3
MB-0192	4	4	4	4	4	4	4	4	4	1	1	1	1	4	4	1	1	1	4	4	2	4	1	1	1
MB-0121	1	1	1	1	1	1	1	1	1	1	1	1	1	1	1	1	1	1	1	1	1	1	1	1	1
MB-0239	1	1	1	1	1	1	1	1	1	1	1	1	1	1	1	1	1	1	1	1	1	1	1	1	1
MB-0364	1	1	1	1	1	1	1	1	1	1	1	1	1	1	1	1	1	1	1	1	1	1	1	1	1
MB-0232	1	1	1	1	1	1	1	1	1	1	1	1	1	1	1	1	1	1	1	1	1	1	1	1	1
MB-0884	2	2	2	2	2	2	2	2	2	2	2	2	2	2	2	2	2	2	2	2	2	2	2	2	2
MB-0238	5	5	5	5	5	5	5	5	5	5	5	5	5	5	5	5	5	5	5	5	5	5	5	5	5
MB-0194	1	4	4	4	1	1	1	1	1	1	1	1	1	1	1	1	1	1	1	4	1	1	1	1	1
MB-0882	2	2	2	2	2	2	2	2	2	2	2	2	2	2	2	2	2	2	2	2	2	2	2	2	2
MB-0010	2	2	2	2	2	2	2	2	2	2	2	2	2	2	2	2	2	2	2	2	2	2	2	2	2
MB-0236	1	1	1	1	1	1	1	1	1	1	1	1	1	1	1	1	2	1	1	1	1	1	1	1	1
MB-0377	4	4	4	4	4	4	1	1	4	4	4	4	4	4	1	1	1	4	4	4	4	4	1	1	4
MB-0123	1	2	1	1	2	2	2	2	1	1	1	1	1	1	2	1	1	1	1	1	1	2	1	2	1
MB-0504	1	1	1	1	1	1	1	1	1	1	1	1	1	1	1	1	1	1	1	1	1	1	1	1	1
MB-0564	3	3	3	3	3	4	4	3	5	3	5	1	3	3	3	3	1	3	5	3	3	4	1	4	3
MB-0475	INC	1	2	2	1	1	1	1	1	1	3	3	4	1	1	2	3	1	2	2	3	1	1	2	3
MB-0321	1	1	2	2	1	1	2	2	2	2	1	1	1	1	1	1	1	1	1	2	1	1	1	3	1
MB-0482	INC	4	4	4	5	5	4	5	5	5	3	5	5	3	3	5	3	3	3	4	5	4	5	5	5
MB-0101	1	1	1	1	1	1	1	1	1	1	1	1	1	1	1	1	1	1	1	1	1	1	1	1	1
MB-0662	1	4	1	1	3	1	1	1	1	1	1	1	3	1	1	1	1	1	1	1	1	1	1	1	1
MB-0291	2	2	2	2	2	2	2	2	2	2	2	2	2	2	2	2	2	1	2	2	2	2	2	2	2
MB-0465	2	2	2	2	4	2	2	2	1	1	2	2	2	2	2	2	2	2	1	2	2	2	2	2	2
MB-0630	2	2	2	2	2	2	2	2	2	2	2	2	2	2	2	2	2	2	2	2	2	2	2	2	2
MB-0036	1	1	1	1	1	1	1	1	1	1	1	1	1	1	1	1	1	1	1	1	1	1	1	1	1
MB-0166	1	1	1	1	1	1	1	1	1	1	1	1	1	1	1	1	1	1	1	1	1	1	1	1	1
MB-0180	1	1	1	1	1	1	1	1	1	1	1	1	1	1	1	1	2	1	1	1	1	1	1	1	1
MB-0525	5	3	3	3	5	5	5	5	5	3	3	5	5	3	5	3	3	5	3	3	5	3	5	5	5
MB-0307	4	4	4	4	1	4	4	1	4	1	3	4	1	1	1	4	4	1	4	4	4	1	1	4	4
MB-0002	1	1	1	1	2	2	1	1	1	1	2	2	2	2	1	1	1	1	1	1	2	1	1	2	1
MB-0408	1	1	1	1	1	1	1	1	1	1	1	1	1	1	1	1	1	1	1	1	1	1	1	1	1
MB-0466	1	1	1	1	1	1	1	1	1	1	1	1	1	1	1	1	1	1	1	1	1	4	1	1	1
MB-0632	1	1	1	1	1	1	1	1	3	1	3	3	1	1	1	1	3	5	1	1	1	1	1	1	3
MB-0120	2	2	2	2	1	1	2	2	1	2	2	2	1	3	1	1	2	1	2	2	2	2	1	1	1
MB-0507	1	1	1	1	1	1	1	1	1	1	1	1	1	1	1	1	1	1	1	1	1	1	1	1	1
MB-0287	2	2	2	2	2	2	2	2	2	1	1	1	3	2	2	1	1	1	2	2	2	2	2	1	1
MB-0869	5	5	5	5	5	5	5	5	5	5	5	5	5	5	5	5	5	5	5	5	5	5	5	5	5
MB-4633	1	1	1	1	1	1	1	1	1	1	1	1	1	1	1	1	1	1	1	1	1	1	1	1	1
MB-4627	1	1	1	1	1	1	1	1	1	1	1	1	1	1	1	1	1	1	1	1	1	1	1	1	1
MB-4004	2	2	2	2	2	2	2	2	2	2	1	2	1	1	2	1	1	1	2	2	2	2	1	1	2
MB-4708	1	1	1	1	1	1	1	1	1	1	1	1	1	1	1	1	1	1	1	1	1	1	1	1	1
MB-4618	2	2	2	2	2	2	2	2	2	2	1	2	1	2	2	2	2	2	1	2	2	2	2	2	2
MB-4641	1	1	1	1	1	1	1	1	1	1	1	1	1	1	1	1	1	1	1	1	1	1	1	1	1
MB-4622	5	5	5	5	5	5	5	5	5	5	5	5	5	5	5	5	5	5	5	5	5	5	5	5	5
MB-4634	1	1	1	1	1	1	1	1	1	1	1	1	1	1	1	1	1	1	1	1	1	1	1	1	1
MB-4688	2	2	2	2	2	2	2	2	2	2	2	2	2	2	2	2	2	2	2	2	2	2	2	2	2
MB-4665	1	1	1	1	1	1	1	1	1	1	1	1	1	1	1	1	1	1	1	1	1	1	1	1	1
MB-4666	1	1	1	1	1	1	1	1	1	1	4	1	1	1	1	1	2	1	1	1	2	1	1	1	1
MB-4640	3	3	3	3	3	3	3	3	3	2	5	3	5	3	3	3	3	5	3	3	3	3	3	1	3
MB-4691	1	1	1	1	1	1	1	1	1	1	1	1	1	1	1	1	1	1	1	1	1	1	1	1	1
MB-4671	2	2	2	2	2	2	1	2	1	1	2	2	2	2	1	2	2	1	2	2	1	2	2	2	2
MB-4667	3	3	3	3	3	3	3	3	3	1	1	3	3	3	3	3	1	3	4	3	1	3	3	3	3
MB-4721	1	1	1	1	1	1	1	1	1	1	1	1	1	1	1	1	1	1	1	1	1	1	1	1	1
MB-4723	2	2	2	2	2	2	2	2	1	1	2	2	2	2	2	2	2	2	2	2	2	2	2	2	2
MB-4718	4	4	4	4	4	1	1	1	4	4	1	4	4	4	1	4	1	4	4	4	4	4	1	4	4
MB-4716	1	1	1	1	1	1	1	1	1	1	1	1	1	1	1	1	1	1	1	1	1	1	1	4	1
MB-4729	1	3	3	3	3	3	1	1	3	1	4	1	1	3	1	1	1	3	1	3	1	1	1	2	1
MB-4717	5	5	5	5	5	5	5	5	5	5	5	5	5	5	5	5	5	5	5	5	5	5	5	5	5
MB-4724	3	3	3	3	3	3	3	3	3	3	3	3	3	3	3	3	3	3	3	3	3	3	3	3	3
MB-4770	3	3	3	3	3	3	3	3	3	3	3	3	3	3	5	3	3	3	3	3	3	3	3	3	3
MB-4752	1	1	1	1	1	1	1	1	1	1	1	1	1	1	1	1	1	1	1	1	1	1	1	1	1
MB-4762	1	1	1	1	1	1	1	1	1	1	1	1	1	1	1	1	1	1	1	1	1	1	1	1	1
MB-5169	2	2	2	2	2	2	2	1	2	1	2	2	2	1	1	2	1	1	1	2	1	1	2	1	2
MB-4796	2	2	2	2	2	2	2	2	2	2	2	2	2	2	2	2	2	2	2	2	2	2	2	2	2
MB-4790	1	1	1	1	1	1	1	1	1	1	1	1	1	1	1	1	1	1	4	1	1	1	1	1	1
MB-4797	1	1	1	1	1	1	1	1	1	1	2	1	1	1	1	1	1	2	1	1	2	1	1	1	1
MB-4800	1	1	1	1	1	1	1	1	1	1	1	1	1	1	1	1	1	1	1	1	1	1	1	1	1
MB-5541	1	4	4	4	1	1	1	1	4	1	4	1	1	4	4	1	4	1	4	4	1	1	1	1	1
MB-5549	3	3	3	3	3	3	3	3	3	3	3	3	3	3	3	3	3	3	3	3	3	3	3	3	3
MB-5519	2	2	2	2	2	2	2	2	2	2	2	2	2	2	2	2	2	2	1	2	2	2	2	1	2
MB-5495	1	1	1	1	1	1	1	1	1	1	1	1	1	1	1	1	1	1	1	1	1	1	1	1	1
MB-4832	1	1	1	1	1	1	1	1	1	1	1	1	1	1	1	1	1	1	1	1	1	1	1	1	1
MB-4745	3	3	3	3	5	3	3	3	3	3	5	3	5	3	5	5	3	1	4	3	5	3	5	5	5
MB-4825	2	2	2	2	2	2	2	2	1	1	1	1	1	2	2	1	1	2	1	2	1	2	2	2	1
MB-4814	4	4	4	4	4	4	4	4	4	1	4	1	1	1	4	4	1	1	4	4	4	4	1	1	1
MB-4757	5	5	5	5	5	5	5	5	5	5	5	5	5	5	5	5	5	5	5	5	5	5	5	5	5
MB-4694	5	5	5	5	5	5	5	5	5	5	2	2	2	5	5	5	1	5	4	5	4	5	5	5	1
MB-4698	1	1	1	1	1	1	1	1	1	1	1	1	1	1	1	1	1	1	1	1	1	1	1	1	1
MB-4715	5	5	5	5	5	5	5	5	5	5	5	5	5	5	5	5	5	5	5	5	5	5	5	5	5
MB-4685	2	2	2	2	2	2	2	2	2	2	2	2	2	2	2	2	1	2	2	2	2	2	2	2	2
MB-4712	3	3	3	3	4	4	4	4	4	3	3	3	3	3	4	3	3	5	1	3	3	4	3	3	3
MB-4672	INC	2	2	2	1	1	1	1	1	1	2	2	2	2	1	1	2	2	2	2	3	1	2	1	1
MB-4704	1	4	4	4	1	4	1	1	1	1	1	1	1	1	1	1	1	1	1	4	1	1	1	1	1
MB-4655	1	1	1	1	1	1	1	1	1	1	1	1	1	4	1	1	1	1	3	1	1	1	1	2	1
MB-4651	2	2	2	2	2	2	2	2	2	1	2	2	2	2	2	2	2	2	2	2	2	2	2	2	2
MB-4661	1	1	1	1	1	1	1	1	1	1	1	1	1	1	1	1	1	2	1	1	1	1	1	1	1
MB-4649	2	2	2	2	2	2	2	2	2	2	1	2	2	2	2	2	2	2	1	2	2	2	2	2	2
MB-4642	2	2	2	2	2	2	2	2	2	1	1	2	2	2	2	2	2	2	2	2	2	2	2	2	2
MB-4674	1	1	1	1	1	1	1	1	1	1	2	1	1	1	1	1	1	1	1	1	1	1	1	1	1
MB-4648	2	2	2	2	2	2	2	2	2	2	2	2	2	2	2	2	2	2	2	2	2	2	2	2	2
MB-5197	1	2	1	2	1	1	1	1	1	2	1	1	1	2	1	1	2	1	1	2	1	1	1	2	1
MB-5152	1	1	2	2	1	1	1	2	1	1	2	1	2	1	2	2	1	2	1	2	1	1	1	1	2
MB-5201	1	1	1	1	1	1	1	1	1	1	1	1	1	1	1	1	1	1	1	1	1	1	1	1	1
MB-5189	1	1	1	1	1	1	1	1	1	1	1	1	1	1	1	1	1	1	1	1	1	1	1	1	1
MB-5281	3	3	3	3	3	1	3	3	3	3	3	3	3	1	3	1	1	3	1	3	3	3	3	3	3
MB-5212	2	2	2	2	2	2	2	2	2	2	2	2	2	2	1	2	2	2	2	2	2	2	2	2	2
MB-5172	3	3	3	3	3	3	3	3	2	2	3	3	3	3	2	3	3	5	3	3	3	3	2	3	3
MB-5183	1	1	1	1	1	1	1	1	1	1	1	1	1	1	1	1	1	1	1	1	1	1	1	1	1
MB-5185	1	1	1	1	1	1	1	1	1	1	1	1	1	1	1	1	1	2	1	1	2	1	1	2	1
MB-5022	3	3	3	3	2	3	3	1	1	1	4	3	1	1	3	3	3	3	3	3	3	3	1	1	3
MB-5014	2	2	2	2	2	2	2	2	2	2	1	2	2	2	2	2	2	2	2	2	2	2	2	2	2
MB-4994	2	2	2	2	2	1	2	2	2	2	1	2	1	2	2	2	1	2	2	2	2	2	2	2	2
MB-5017	1	1	1	1	2	3	3	1	1	1	1	1	2	1	1	1	1	1	1	1	2	3	1	1	1
MB-4982	3	3	3	3	3	3	3	3	3	3	4	5	5	3	3	3	1	2	3	3	3	3	3	4	5
MB-5004	INC	1	2	2	5	3	3	1	1	1	2	2	5	2	1	2	2	5	2	2	3	3	2	1	3
MB-4986	1	2	1	1	4	4	4	4	2	1	1	1	1	1	1	2	1	1	1	1	1	4	1	1	1
MB-5327	3	3	3	3	3	3	3	3	3	3	3	3	3	3	3	3	3	3	3	3	3	3	3	3	3
MB-5341	INC	2	2	2	1	1	1	1	2	1	2	2	1	2	1	2	1	1	2	2	2	1	1	3	1
MB-5323	5	5	5	5	5	5	5	5	5	5	5	5	5	5	5	5	5	5	5	5	5	5	5	5	5
MB-5328	2	2	2	2	2	2	2	2	1	2	2	2	2	2	2	2	2	2	2	2	2	2	2	2	2
MB-5318	INC	4	1	1	4	5	2	2	2	1	2	2	2	2	2	1	1	1	1	1	2	2	1	4	1
MB-5287	1	1	1	1	1	1	1	1	1	1	1	1	1	1	1	1	1	1	1	1	1	1	1	1	1
MB-5324	1	1	1	1	1	1	1	1	1	1	1	1	1	1	1	1	1	1	1	1	1	1	1	1	1
MB-4682	1	1	2	2	1	1	1	1	1	1	1	1	1	1	1	1	1	1	1	1	1	1	1	1	1
MB-4710	1	1	4	4	4	1	1	1	1	1	1	1	1	1	1	1	1	1	1	4	1	1	1	1	1
MB-4701	1	1	1	1	1	1	1	1	1	1	1	1	1	1	1	1	1	1	1	1	1	1	1	1	1
MB-4709	1	1	1	1	1	1	1	1	1	1	1	1	1	1	1	1	1	1	1	1	1	1	1	1	1
MB-4686	1	1	1	1	1	1	1	1	1	1	1	1	1	1	1	1	1	1	1	1	1	1	1	1	1
MB-4706	1	1	1	1	1	1	1	1	1	1	1	1	1	1	1	1	1	1	1	1	1	1	1	1	1
MB-4719	1	1	1	1	1	1	1	1	1	1	1	1	1	1	1	1	1	1	1	1	1	1	1	1	1
MB-4702	2	2	2	2	2	2	2	2	2	1	2	2	2	2	2	2	2	2	2	2	2	2	2	2	2
MB-4908	2	2	2	2	2	2	2	2	2	2	2	2	2	2	2	2	2	2	2	2	2	2	2	2	2
MB-4871	3	3	3	3	5	5	5	3	3	3	3	5	5	3	5	5	3	3	3	3	5	5	3	5	5
MB-4906	1	1	1	1	1	1	1	1	1	1	2	1	1	1	1	1	1	1	1	1	1	1	1	1	1
MB-4911	5	5	5	5	5	5	5	5	5	5	5	5	5	5	5	5	5	5	5	5	5	5	5	5	5
MB-4866	1	1	1	1	3	1	1	1	1	1	1	1	1	1	1	1	1	1	1	1	1	1	1	1	1
MB-4858	1	1	3	3	1	1	1	1	3	1	1	1	1	3	1	1	1	3	1	3	2	1	1	1	1
MB-4862	2	2	2	2	2	2	2	2	2	2	2	2	2	2	2	2	2	2	2	2	2	2	2	2	2
MB-4872	1	1	1	1	1	1	1	1	1	1	4	1	1	1	1	1	1	1	1	1	1	1	1	1	1
MB-4887	1	4	4	4	3	1	1	1	1	1	1	1	4	4	1	1	1	1	1	4	1	1	1	4	1
MB-4867	1	1	1	1	1	1	1	1	1	1	1	1	1	1	1	1	1	1	1	1	1	1	1	1	1
MB-4888	5	5	5	5	5	5	5	5	5	5	5	5	5	5	5	5	5	5	5	5	5	5	5	5	5
MB-4929	3	3	3	3	3	3	3	3	3	1	1	3	3	3	3	3	3	1	3	3	3	3	3	3	3
MB-4945	5	5	5	5	5	5	5	5	5	5	5	5	5	5	5	5	5	4	5	5	5	5	5	5	5
MB-4930	2	2	2	2	2	2	2	2	3	2	2	2	2	2	2	2	2	2	2	2	3	2	2	2	2
MB-4894	2	2	2	2	2	2	2	2	1	1	2	2	2	2	2	2	2	1	1	2	1	2	2	2	2
MB-4898	1	1	1	1	1	1	1	1	1	1	1	1	1	1	1	1	1	1	1	1	1	1	1	1	1
MB-4670	1	1	1	1	1	1	1	1	1	1	1	1	1	1	1	1	1	1	1	1	1	1	1	1	1
MB-5013	1	1	1	1	1	1	1	1	1	1	1	1	1	1	1	1	1	1	1	1	1	1	1	1	1
MB-4977	1	1	1	1	1	1	1	1	1	1	1	1	1	1	1	1	1	1	1	1	1	1	1	1	1
MB-4967	1	1	1	1	1	1	1	1	1	1	1	1	1	1	1	1	1	1	1	1	1	1	1	1	1
MB-4981	1	1	1	1	1	1	1	1	1	1	1	1	1	1	1	1	1	1	1	1	1	1	1	1	1
MB-4003	2	2	2	2	2	2	2	2	1	2	2	2	2	2	2	2	1	2	2	2	2	2	2	2	2
MB-4968	1	1	1	1	1	1	1	1	1	1	1	1	1	1	1	1	1	1	1	1	1	1	1	1	1
MB-5052	3	3	3	3	3	3	3	3	3	3	3	3	3	3	3	3	3	5	3	3	4	3	3	5	3
MB-5049	2	2	2	2	2	2	2	2	1	1	1	2	2	2	1	2	2	2	2	2	2	2	2	2	2
MB-5041	3	3	3	3	3	3	3	3	3	2	3	3	3	3	3	3	3	3	3	3	3	3	3	2	2
MB-5044	2	2	2	2	2	2	2	2	2	2	2	2	2	2	2	2	2	2	2	2	2	2	2	2	2
MB-5072	3	3	3	3	4	3	3	3	3	3	3	3	3	3	4	3	3	1	3	3	3	3	3	3	3
MB-4171	1	1	2	2	1	1	1	1	1	1	3	2	2	2	1	1	1	2	1	2	2	1	1	2	2
MB-5053	1	1	1	1	1	1	1	1	1	1	1	1	1	1	1	1	1	1	1	1	1	1	1	1	1
MB-5045	1	2	3	3	1	1	1	1	3	1	1	1	1	2	1	1	2	2	1	3	1	1	1	1	1
MB-5116	2	2	2	2	2	2	2	2	2	2	2	2	2	2	2	2	2	2	2	2	2	2	2	2	2
MB-5120	3	3	3	3	3	3	3	3	3	3	3	3	3	3	3	3	3	3	3	3	3	3	3	3	3
MB-5074	1	1	1	1	1	1	2	2	1	1	2	2	1	1	1	1	1	1	1	1	2	2	1	1	2
MB-5119	1	1	1	1	1	1	1	1	1	1	1	1	1	1	1	1	1	1	1	1	1	1	1	1	1
MB-5114	5	3	5	5	3	5	5	5	5	5	3	5	5	5	5	3	1	5	5	3	5	5	5	3	3
MB-4230	1	1	1	1	1	1	1	1	1	1	1	1	1	1	1	1	1	1	2	1	1	1	2	4	1
MB-4154	2	2	2	2	3	2	2	2	1	2	2	2	2	2	2	2	2	5	2	2	2	2	2	2	2
MB-5115	5	5	5	5	5	5	5	5	5	5	5	5	5	5	5	5	5	5	5	5	5	5	5	5	5
MB-4737	2	2	2	2	2	2	2	2	2	2	2	2	2	2	2	2	2	2	2	2	2	2	2	2	2
MB-4764	1	1	1	1	1	1	1	1	1	1	1	1	1	1	1	1	1	1	1	1	4	1	1	1	1
MB-4735	1	1	1	1	1	1	1	1	1	1	1	1	1	1	1	1	1	1	1	1	1	1	1	1	1
MB-4730	1	1	1	1	1	1	1	1	1	1	1	1	1	1	1	1	1	1	1	1	1	1	1	1	1
MB-4733	5	5	5	5	5	5	5	5	5	5	5	5	5	5	5	5	3	5	5	5	5	5	5	5	5
MB-4758	5	5	5	5	4	5	5	5	5	5	5	5	5	5	4	5	5	5	5	5	5	5	5	5	5
MB-5033	1	2	2	2	1	1	1	1	1	1	1	1	1	1	1	1	1	1	1	2	1	1	1	1	1
MB-4741	1	1	1	1	2	2	2	1	2	2	2	2	2	1	2	1	1	1	1	1	1	2	1	2	1
MB-4732	5	5	5	5	5	5	5	5	5	5	5	5	5	5	5	5	1	5	5	5	5	5	5	5	5
MB-5305	1	1	1	1	1	1	1	1	1	1	1	1	1	1	1	1	1	1	1	1	1	1	1	1	1
MB-5256	1	1	1	1	1	1	1	1	1	1	1	1	1	1	1	1	1	1	1	1	1	1	1	1	1
MB-5273	2	2	2	2	2	2	2	2	2	2	2	2	2	2	2	2	2	2	2	2	2	2	2	2	2
MB-5236	5	5	5	5	5	5	5	5	5	5	5	5	5	5	5	5	5	5	5	5	5	5	5	5	5
MB-5238	4	4	4	4	4	4	4	4	4	4	4	4	4	4	4	4	4	4	4	4	4	4	4	4	4
MB-5233	2	2	2	2	2	2	2	2	2	2	2	2	2	2	2	2	2	2	2	2	2	2	2	2	2
MB-5244	2	2	2	2	2	2	2	2	2	2	2	2	2	2	2	2	1	2	2	2	2	2	2	2	2
MB-5253	1	1	1	1	1	1	1	1	1	1	1	1	1	1	1	1	1	1	1	1	1	1	1	1	1
MB-5260	2	2	2	2	2	2	2	2	2	2	2	2	2	2	2	2	1	2	2	2	2	2	2	2	2
MB-4998	1	2	1	1	2	1	2	1	1	2	2	1	1	2	1	2	1	2	2	1	2	1	1	2	1
MB-4993	INC	3	3	3	3	4	3	3	3	3	4	5	5	5	3	5	4	1	4	3	4	3	3	4	5
MB-5001	1	1	1	1	1	1	1	1	4	1	1	1	1	3	4	1	1	5	1	1	1	1	1	1	1
MB-5084	1	1	1	1	1	1	1	1	1	1	1	1	1	1	1	1	1	1	1	1	1	1	1	1	1
MB-4969	1	1	1	1	1	1	1	1	1	1	1	1	1	1	1	1	1	1	1	1	1	1	1	1	1
MB-4999	1	1	1	1	4	1	1	1	1	1	1	1	1	1	1	1	1	1	1	1	1	1	1	1	4
MB-5011	1	1	1	1	1	1	1	1	1	1	1	1	1	1	1	1	1	1	1	1	1	1	1	1	1
MB-4959	1	1	1	1	1	1	1	1	1	1	1	1	1	1	1	1	1	1	1	1	1	1	1	1	1
MB-4599	1	1	1	1	1	1	1	1	1	1	1	1	1	1	1	1	1	1	1	1	1	1	1	1	1
MB-4616	1	1	1	1	1	1	1	1	1	1	1	1	1	1	1	1	1	1	1	1	1	1	1	1	1
MB-4623	1	1	1	1	1	1	1	1	1	1	1	1	1	1	1	1	1	2	1	1	2	1	1	1	2
MB-4644	2	2	2	2	2	2	2	2	2	2	2	2	2	2	2	2	2	2	3	2	2	2	2	2	2
MB-4869	1	1	1	1	1	1	1	1	1	1	1	1	1	1	1	1	1	1	1	1	1	1	1	1	1
MB-4878	1	1	1	1	1	1	1	1	1	1	4	1	1	1	1	1	1	1	1	1	4	1	1	1	1
MB-4851	1	2	1	1	1	1	1	1	2	2	1	1	1	1	1	1	1	2	1	1	2	1	1	1	2
MB-4233	2	2	2	2	2	2	2	2	2	2	2	2	2	2	2	2	2	2	2	2	2	2	2	3	2
MB-4937	2	2	2	2	2	2	1	2	1	2	1	2	2	1	1	2	2	2	2	2	2	2	2	3	2
MB-4934	2	2	2	2	2	2	2	1	2	2	1	2	2	1	2	2	2	1	2	2	1	2	2	2	1
MB-4899	1	1	1	1	1	1	1	1	1	1	1	1	1	1	1	1	1	1	1	1	1	1	1	1	1
MB-4912	2	2	2	2	2	2	2	2	2	2	2	2	2	2	2	2	2	2	2	2	2	2	2	2	1
MB-4935	3	3	3	3	3	3	3	3	3	3	5	3	3	5	5	3	3	3	5	3	3	3	3	2	3
MB-4933	2	2	2	2	3	2	2	2	2	1	2	2	2	1	3	2	1	1	2	2	3	3	2	3	2
MB-4900	2	2	2	2	2	2	2	2	3	3	2	2	2	2	2	2	2	2	2	2	2	2	2	2	2
MB-4941	1	1	1	1	1	1	1	1	1	1	1	1	1	1	1	1	1	1	1	1	1	1	1	1	1
MB-5221	1	1	1	1	1	1	1	1	2	1	1	1	1	1	1	1	1	1	1	1	1	1	1	1	1
MB-5139	2	2	2	2	1	1	1	1	1	2	1	2	2	2	2	1	1	2	2	2	2	1	2	1	1
MB-5222	INC	3	5	3	5	3	5	3	3	3	3	5	3	5	5	5	5	3	5	5	5	5	3	3	3
MB-5097	1	2	2	2	1	1	1	2	1	1	2	2	2	1	2	2	1	1	1	2	1	1	1	1	2
MB-5338	2	2	2	2	2	2	2	2	2	2	2	2	2	2	2	2	2	2	2	2	2	2	2	2	2
MB-5315	3	3	3	3	3	3	3	3	3	3	4	5	5	3	3	3	5	4	3	3	3	3	5	3	5
MB-5195	2	2	2	2	2	2	2	2	2	2	1	2	2	2	2	2	2	2	3	2	2	2	2	1	2
MB-5226	2	2	2	2	2	2	2	2	2	1	2	2	2	2	2	1	2	1	2	2	2	2	2	2	2
MB-5232	5	5	5	5	5	5	5	5	5	5	5	5	5	5	5	5	1	5	5	5	5	5	5	5	5
MB-5160	2	2	2	2	2	2	2	2	2	2	2	2	2	2	2	2	2	2	2	2	2	2	2	2	2
MB-5126	5	5	5	5	5	5	5	5	5	5	5	5	5	5	5	5	5	5	5	5	5	5	5	5	5
MB-5124	2	2	2	2	2	2	2	2	2	2	2	2	2	2	2	2	2	2	2	2	2	2	2	2	2
MB-4855	1	1	1	1	1	1	1	1	1	1	1	1	1	1	1	1	1	1	1	1	1	1	1	2	1
MB-5279	1	1	1	1	1	1	1	1	1	2	2	1	1	2	1	1	1	2	2	1	2	1	1	1	2
MB-4173	1	1	1	1	1	1	1	1	1	1	1	1	1	1	1	1	1	1	1	1	1	1	1	1	1
MB-5145	4	4	5	5	5	5	4	4	5	4	4	4	4	4	4	4	4	4	4	5	4	4	4	5	5
MB-4944	2	2	2	2	2	2	2	2	2	2	2	2	2	2	2	2	2	2	2	2	2	2	2	2	2
MB-4961	1	1	1	1	1	1	1	1	1	1	1	1	2	1	1	1	2	2	1	1	1	1	1	2	1
MB-5121	2	2	2	2	2	2	2	2	2	2	2	2	2	2	2	2	2	2	2	2	2	2	2	2	2
MB-4956	2	2	2	2	2	2	2	2	2	1	2	2	2	2	2	2	1	1	2	2	2	2	2	2	1
MB-4886	3	3	3	3	5	3	3	3	5	3	4	3	3	3	3	3	3	3	5	3	3	3	3	3	3
MB-4950	1	1	1	1	1	1	1	1	1	1	1	1	1	1	1	1	2	1	1	1	1	1	1	1	1
MB-4965	1	1	2	2	1	1	1	1	1	1	2	1	1	1	1	1	1	2	1	2	1	1	1	1	1
MB-4962	1	1	1	1	1	1	1	1	1	1	1	1	1	1	1	1	1	1	1	1	1	1	1	1	1
MB-4952	3	3	3	3	3	3	3	3	3	3	3	3	3	3	3	3	3	5	3	3	3	3	3	3	3
MB-5267	1	1	4	4	1	1	1	1	1	1	4	1	1	1	1	1	4	4	4	4	4	1	1	1	1
MB-5266	2	2	2	2	3	2	2	2	2	2	2	2	2	2	2	2	2	2	2	2	2	2	2	3	2
MB-5396	2	2	2	2	2	2	2	2	2	2	2	2	2	2	2	2	2	2	2	2	2	2	2	2	2
MB-4938	5	5	5	5	5	5	5	5	5	5	5	5	5	5	5	5	5	5	5	5	5	5	5	5	5
MB-5351	4	4	4	4	4	4	4	4	4	4	1	4	4	4	4	4	4	4	4	4	4	4	4	4	1
MB-5347	2	2	2	2	2	2	2	2	2	2	2	2	2	2	2	2	2	2	2	2	2	2	2	2	2
MB-5312	3	3	3	3	5	5	5	5	5	1	5	3	3	3	3	3	5	5	3	3	5	5	3	3	3
MB-5311	1	1	1	1	1	1	1	1	1	1	1	1	1	1	1	1	1	1	1	1	1	1	1	1	4
MB-5284	1	1	1	1	1	1	1	1	1	1	1	1	1	1	1	1	1	1	1	1	1	1	1	1	1
MB-4148	2	2	2	2	1	1	2	2	2	2	2	2	2	2	1	2	2	2	2	2	2	2	2	2	2
MB-5078	INC	2	3	3	1	3	3	3	3	1	1	1	2	2	3	2	3	3	2	3	1	3	2	3	1
MB-5088	1	1	2	2	1	1	1	1	1	1	1	1	1	1	1	1	2	2	1	2	1	1	1	2	2
MB-5064	1	1	1	1	1	1	1	1	1	1	1	1	1	1	1	1	1	1	1	1	1	1	1	1	1
MB-5107	2	2	2	2	2	2	2	2	2	2	2	2	2	2	2	2	2	2	2	2	2	2	2	2	2
MB-5066	1	1	1	1	1	1	1	1	1	1	1	1	1	1	1	1	1	1	1	1	1	1	1	1	1
MB-5068	1	1	1	1	1	1	1	1	1	1	1	1	1	1	1	1	1	1	1	1	1	1	1	1	1
MB-5061	2	2	2	2	2	2	2	2	2	2	2	2	2	2	2	2	2	2	1	2	1	2	2	2	2
MB-5070	5	5	5	5	5	5	5	5	5	5	5	5	5	5	5	5	5	5	5	5	5	5	5	5	5
MB-5059	1	1	1	1	1	1	1	1	1	1	1	1	1	1	1	1	1	1	1	1	1	1	1	1	1
MB-4266	INC	2	1	2	1	3	3	1	2	1	4	1	3	3	1	2	2	1	1	2	1	3	1	1	3
MB-4276	INC	3	3	3	1	3	3	3	1	1	2	2	2	2	3	2	2	2	2	3	1	3	2	2	2
MB-4771	1	1	1	1	1	1	1	1	1	1	1	1	1	1	1	1	1	1	1	1	1	1	1	1	1
MB-4739	1	1	1	1	1	1	1	1	1	1	1	1	1	1	1	1	1	1	1	1	1	1	1	1	1
MB-5331	1	1	1	1	1	1	1	1	1	1	1	1	1	1	1	1	1	1	1	1	1	1	1	3	1
MB-4743	1	4	4	4	1	1	4	1	1	1	4	4	1	1	1	4	1	4	4	4	1	1	1	1	4
MB-4785	1	2	2	2	1	1	1	1	1	1	1	1	1	1	1	1	1	2	2	2	1	1	1	2	1
MB-4778	1	1	1	1	1	1	1	1	1	1	1	1	1	1	1	1	1	1	1	1	1	1	1	1	1
MB-4763	3	3	3	3	3	3	3	3	3	3	3	3	3	3	3	3	3	3	3	3	3	3	3	3	3
MB-4779	1	1	1	1	1	1	1	1	1	1	1	1	1	1	1	1	1	1	1	1	1	1	1	1	1
MB-4849	1	2	2	2	1	2	1	1	2	1	1	1	1	1	1	2	2	1	1	2	1	2	2	2	1
MB-4787	1	1	1	1	1	1	1	1	1	1	1	1	1	1	1	1	1	1	1	1	1	1	1	1	1
MB-4767	2	2	2	2	2	2	2	2	1	2	1	2	2	1	2	2	1	2	1	2	1	2	2	1	2
MB-4784	1	1	1	1	1	1	1	1	1	1	1	1	1	1	1	1	1	1	1	1	1	1	1	1	1
MB-5043	1	1	1	1	1	1	1	1	1	1	1	1	1	1	1	1	1	1	1	1	1	1	1	1	1
MB-4992	1	1	1	1	3	1	1	1	3	1	1	1	1	1	3	1	1	1	1	1	4	1	1	3	3
MB-5020	1	1	1	1	1	1	1	1	1	1	1	1	1	1	1	1	1	1	1	1	1	1	1	1	1
MB-5019	3	3	3	3	3	4	5	3	4	3	5	5	4	3	3	3	5	1	3	3	5	4	3	3	3
MB-5015	1	1	1	1	1	1	1	1	1	1	1	1	1	1	1	1	1	1	1	1	1	1	1	1	2
MB-5048	1	1	1	1	1	1	1	1	1	1	1	1	1	1	1	1	1	1	1	1	1	1	1	1	1
MB-5035	1	1	1	1	1	1	1	1	1	1	4	1	1	1	1	1	1	1	1	1	4	1	1	1	1
MB-5398	1	1	1	1	1	1	1	1	1	1	1	1	1	1	1	1	1	1	1	1	1	1	1	1	1
MB-5377	1	1	1	1	1	1	1	1	1	1	1	1	1	1	1	1	2	2	2	1	1	1	1	1	1
MB-5291	2	2	2	2	2	2	2	2	1	2	2	2	2	2	2	2	2	2	2	2	2	2	2	1	2
MB-5403	1	1	1	1	1	1	1	1	1	1	1	1	1	1	1	1	1	1	1	1	1	1	1	1	1
MB-5224	1	1	1	1	1	1	1	1	1	1	1	1	1	1	1	1	1	1	1	1	1	1	1	1	1
MB-5369	1	1	1	1	1	1	1	1	1	1	1	1	1	1	1	1	1	1	1	1	1	1	1	1	1
MB-5404	1	1	1	1	1	1	1	1	1	1	1	1	1	1	1	1	1	1	1	1	1	1	1	1	2
MB-5397	1	1	2	2	1	1	1	1	1	1	2	2	2	1	1	1	1	1	1	2	2	1	1	1	1
MB-5378	5	5	5	5	5	5	5	5	5	5	5	5	5	5	5	5	5	5	5	5	5	5	5	5	5
MB-5388	1	1	1	1	1	1	1	1	1	1	1	1	1	1	1	1	1	1	1	1	1	1	1	1	1
MB-5395	1	1	1	1	1	1	1	1	1	1	1	1	1	1	1	1	1	1	1	1	1	1	1	1	1
MB-5365	1	1	1	1	1	1	1	1	1	1	1	1	1	1	1	1	2	1	1	1	1	1	1	1	1
MB-5389	1	1	2	2	1	1	1	1	1	1	1	1	1	2	2	1	1	1	2	2	1	1	1	2	1
MB-5385	1	1	1	1	2	2	1	1	2	2	1	1	1	1	2	1	1	1	1	1	1	1	1	1	1
MB-5393	1	1	1	1	2	1	1	1	1	1	1	1	1	1	1	1	1	1	1	1	1	1	1	1	1
MB-5289	1	1	1	1	1	1	1	1	1	1	1	1	1	1	1	1	1	1	1	1	1	1	1	1	1
MB-5361	2	2	2	2	2	2	1	1	2	1	2	1	2	1	2	2	2	2	2	2	2	2	1	1	1
MB-5392	3	3	3	3	3	3	3	3	5	5	3	3	3	3	3	3	3	3	3	3	3	3	3	3	3
MB-5147	1	1	1	1	3	1	1	1	1	1	1	3	1	1	1	1	1	1	4	1	3	1	1	1	3
MB-4140	1	1	1	1	1	1	1	1	1	1	1	1	1	1	1	1	1	1	1	1	1	1	1	1	1
MB-5138	5	5	5	5	5	3	5	5	3	3	5	5	5	5	2	5	5	5	5	5	5	5	5	5	5
MB-5123	1	1	1	1	1	1	1	1	1	1	1	1	1	1	1	1	1	1	1	1	1	1	1	1	1
MB-5065	5	5	5	5	5	5	5	5	5	5	5	5	5	5	5	5	3	5	5	5	5	5	5	5	5
MB-4127	3	3	3	3	3	3	3	3	3	2	3	3	3	3	3	3	3	3	3	3	3	3	3	3	3
MB-5058	3	3	3	3	3	3	4	3	3	1	3	3	3	3	3	1	3	3	3	3	3	3	1	4	3
MB-5050	1	1	1	1	1	1	1	1	1	1	1	1	1	1	1	1	1	1	1	1	1	1	1	1	1
MB-5027	1	1	1	1	1	1	1	1	1	1	1	1	1	1	1	1	1	1	1	1	1	1	1	1	1
MB-5060	2	2	2	2	2	2	2	2	2	2	2	2	2	2	2	2	2	2	2	2	2	2	2	2	2
MB-5062	2	2	2	2	2	2	2	2	2	2	2	2	2	2	2	2	2	2	2	2	2	2	2	3	2
MB-5383	2	2	2	2	1	2	2	2	1	1	1	1	1	2	1	1	1	2	1	2	2	2	2	2	1
MB-5101	2	2	2	2	2	2	2	2	1	2	2	2	2	2	2	2	2	2	2	2	2	2	2	2	2
MB-5258	5	5	5	5	5	5	5	5	5	5	5	5	5	5	5	5	5	5	5	5	5	5	5	5	5
MB-5268	1	1	1	1	1	1	1	1	1	1	1	1	1	1	1	1	1	1	1	1	1	1	1	1	1
MB-5261	2	2	2	2	2	2	2	2	2	2	2	2	2	2	2	2	1	2	2	2	2	2	2	2	1
MB-5272	INC	3	4	4	5	4	5	3	2	5	5	3	4	4	5	5	5	1	3	4	4	5	3	3	2
MB-5264	1	1	1	1	1	1	1	1	1	1	1	1	1	1	1	1	1	1	1	1	1	1	1	1	1
MB-5259	3	3	3	3	3	3	3	3	3	3	5	3	3	5	3	3	3	3	3	3	3	3	3	3	3
MB-5306	INC	2	2	2	1	1	1	1	1	1	2	2	1	2	1	2	2	1	1	2	1	1	2	2	2
MB-5270	2	2	2	2	2	2	2	2	2	1	1	1	1	2	2	2	1	1	1	2	2	2	1	2	1
MB-5411	3	3	3	3	3	3	3	3	3	3	3	3	3	3	3	3	5	3	3	3	3	3	3	2	3
MB-5490	1	1	1	1	1	1	1	1	1	1	2	1	1	1	1	1	1	1	1	1	1	1	1	1	1
MB-5421	5	5	5	5	5	5	5	5	5	5	5	5	5	5	5	5	5	4	5	5	5	5	5	5	5
MB-5348	5	5	5	5	5	5	5	5	5	5	5	5	5	5	5	5	5	5	5	5	5	5	5	5	5
MB-5429	1	1	1	1	1	1	1	1	1	1	1	1	1	1	1	1	1	1	1	1	1	1	1	1	1
MB-5405	2	2	2	2	2	2	2	2	2	2	2	2	2	2	2	2	2	2	2	2	2	2	2	2	2
MB-5414	2	3	3	3	1	2	2	2	2	2	2	2	2	3	1	2	2	1	1	3	2	2	2	1	2
MB-5489	1	1	1	1	1	1	1	1	1	1	1	1	1	1	1	1	1	1	1	1	1	1	1	1	1
MB-5417	3	3	3	3	5	3	3	3	3	3	3	3	3	3	5	3	1	3	3	3	3	3	3	5	3
MB-5481	2	2	2	2	2	2	2	2	2	2	2	2	2	2	2	2	1	2	2	2	2	2	2	1	2
MB-5409	3	3	3	3	3	3	3	3	3	3	3	3	3	3	5	3	3	3	3	3	3	3	3	3	3
MB-5413	1	1	1	1	1	1	1	1	1	1	1	1	1	1	1	1	1	1	1	1	1	1	1	1	1
MB-5299	5	5	5	5	5	5	5	5	5	5	5	5	5	5	5	5	5	5	5	5	5	5	5	5	5
MB-5408	3	3	4	4	4	3	3	3	1	1	3	3	3	3	5	3	3	3	4	3	3	4	1	5	4
MB-5475	2	2	2	2	2	2	2	2	2	2	1	1	2	2	2	2	1	1	2	2	1	2	1	1	2
MB-5505	2	2	2	2	2	2	2	2	2	2	2	2	2	2	2	2	2	2	2	2	1	2	2	2	2
MB-5100	5	5	5	5	5	5	5	5	5	5	5	5	5	5	5	5	5	5	5	5	5	5	5	5	5
MB-5325	5	5	5	5	4	5	5	5	5	5	5	5	5	5	5	5	5	5	5	5	5	5	5	5	5
MB-5502	2	2	2	2	2	2	2	2	2	2	2	2	2	2	2	2	2	2	2	2	2	2	2	2	2
MB-5485	2	2	2	2	2	2	2	2	2	2	1	2	2	2	2	2	2	2	4	2	1	2	2	2	2
MB-4293	1	1	1	1	1	1	1	1	1	1	1	1	1	1	1	1	1	1	1	1	1	1	1	1	1
MB-4289	2	2	2	2	3	2	2	2	2	2	1	1	2	1	1	1	1	2	2	2	1	2	2	1	1
MB-5293	1	1	1	1	1	1	1	1	1	1	2	2	2	1	1	2	2	1	1	1	2	1	1	1	2
MB-5381	3	3	3	3	3	3	3	3	3	3	3	3	3	3	5	3	1	5	3	3	3	3	3	3	3
MB-4834	2	2	2	2	2	2	2	2	2	2	2	2	2	2	2	2	1	2	2	2	2	2	2	2	2
MB-5498	INC	2	3	3	1	3	5	2	4	2	2	2	2	2	5	2	1	2	1	3	2	3	2	1	2
MB-4749	1	1	1	1	1	1	1	1	1	1	1	1	1	1	1	1	1	1	1	1	1	1	1	1	2
MB-4818	1	2	2	2	2	1	1	2	1	1	1	1	1	2	2	1	1	2	1	2	1	1	1	2	2
MB-4805	1	1	1	1	1	1	1	1	1	1	1	1	1	1	1	1	2	1	2	1	1	1	1	1	1
MB-4809	5	5	5	5	5	5	5	5	5	5	5	5	5	5	5	5	5	5	5	5	5	5	5	5	5
MB-5418	2	2	2	2	2	2	2	2	2	2	2	2	2	2	2	2	2	2	2	2	2	2	2	2	2
MB-5441	INC	4	3	3	3	3	3	1	1	1	3	1	1	1	4	1	1	4	4	3	1	4	1	1	3
MB-5424	1	1	1	1	1	1	1	1	1	1	1	1	1	1	1	1	1	1	1	1	1	1	1	1	1
MB-5296	3	3	4	4	3	3	3	3	4	3	3	3	5	3	3	3	5	1	4	3	3	3	3	4	5
MB-5446	3	3	3	3	1	3	3	3	1	3	3	3	3	3	3	3	3	3	1	3	3	3	3	3	3
MB-5137	5	5	5	5	5	5	5	5	5	5	5	5	5	5	5	5	5	5	5	5	5	5	5	5	5
MB-5219	1	1	1	1	1	1	1	1	1	1	1	1	1	1	1	1	1	1	1	1	1	1	1	1	1
MB-5093	2	2	2	2	2	2	2	2	2	2	1	2	2	2	2	2	1	2	2	2	2	2	1	2	1
MB-5350	INC	1	2	2	3	2	2	2	1	1	2	1	3	2	2	2	1	1	1	2	3	2	1	2	1
MB-5230	1	1	1	1	1	1	1	1	1	1	1	1	1	1	1	1	4	1	1	1	1	1	1	1	1
MB-5206	1	1	1	1	4	1	1	1	1	1	1	1	1	1	1	1	1	4	1	1	1	1	1	1	1
MB-4687	1	4	4	3	4	1	1	1	4	1	1	1	1	1	1	2	1	1	1	4	3	1	1	1	1
MB-5433	1	1	2	2	1	1	1	1	1	1	1	1	1	1	1	1	1	1	1	2	2	1	2	1	1
MB-5442	5	5	5	5	5	5	5	5	5	5	5	5	5	5	5	5	5	5	5	5	5	5	5	5	5
MB-5427	5	5	5	5	5	5	5	5	5	5	5	5	5	5	5	5	1	5	5	5	5	5	5	5	5
MB-5491	2	2	2	2	1	1	2	2	2	1	2	2	2	1	2	2	2	2	2	2	2	2	2	1	1
MB-5493	2	2	2	2	2	2	2	2	1	1	1	2	2	2	1	2	2	2	2	2	2	2	2	1	2
MB-5451	1	1	1	1	1	1	1	1	1	1	1	1	1	1	1	1	1	1	1	1	1	1	1	2	1
MB-5454	INC	3	3	3	3	3	3	3	5	2	2	2	2	2	3	2	3	2	2	3	2	3	2	1	2
MB-5360	1	1	1	1	1	1	1	1	1	1	1	1	1	1	1	1	1	1	1	1	1	1	1	1	1
MB-5229	3	3	3	3	3	4	3	3	4	4	3	3	4	3	3	5	3	4	5	3	4	3	3	4	3
MB-4827	1	1	1	1	1	1	1	1	1	1	1	1	1	1	1	1	1	1	1	1	1	1	1	1	1
MB-5455	1	1	1	1	3	1	1	1	4	1	1	1	1	1	1	1	1	1	1	1	1	1	1	1	1
MB-5349	1	1	1	1	1	1	1	1	1	1	1	1	1	1	1	1	1	1	2	1	1	1	1	1	1
MB-5370	2	2	2	2	2	2	2	2	2	2	2	2	2	2	2	2	2	2	2	2	2	2	2	2	2
MB-5290	1	1	1	1	1	1	1	1	1	1	1	1	1	1	1	1	1	1	1	1	1	1	1	1	1
MB-5366	INC	3	3	3	3	3	3	3	3	3	2	2	2	2	2	2	2	2	2	3	2	3	2	4	2
MB-5382	1	1	1	1	1	1	1	1	1	1	1	1	1	1	1	1	1	1	1	1	1	1	1	1	1
MB-5402	1	2	2	2	1	1	1	1	1	1	1	1	1	1	1	1	1	2	1	2	1	1	1	1	1
MB-5288	2	1	2	2	2	2	2	1	2	2	2	1	2	1	2	1	2	2	2	2	1	2	2	2	2
MB-5384	1	2	1	1	1	1	1	1	1	1	1	1	1	1	1	1	2	1	1	1	1	1	1	1	1
MB-5358	1	1	1	1	1	1	1	1	1	1	1	1	1	1	1	1	1	1	1	1	1	1	1	1	1
MB-4357	1	1	3	3	3	3	3	1	2	3	1	1	1	1	3	1	1	1	1	3	1	3	1	1	1
MB-4991	2	2	2	2	2	2	2	2	2	2	2	2	2	2	2	2	2	2	2	2	2	2	2	2	2
MB-5401	1	1	1	1	1	1	1	1	1	1	1	1	1	1	1	1	1	1	1	1	1	1	1	1	1
MB-5387	5	5	5	5	5	5	5	5	5	5	5	5	5	5	5	5	5	5	5	5	5	5	5	5	5
MB-5390	5	5	5	5	5	5	5	5	5	5	5	5	5	5	5	5	5	5	5	5	5	5	5	5	5
MB-5412	1	1	1	1	1	1	1	1	1	1	1	1	1	1	1	1	1	1	1	1	1	1	1	1	1
MB-5193	1	1	2	2	1	2	2	1	1	2	1	1	2	1	1	1	2	1	1	2	1	2	1	1	2
MB-5182	1	1	1	1	1	1	1	1	1	1	1	1	1	1	1	1	1	1	1	1	1	1	1	1	1
MB-5157	3	3	3	3	4	3	3	3	5	1	3	3	3	1	5	3	3	3	3	3	3	3	3	3	3
MB-5205	5	5	5	5	4	5	5	5	5	5	5	5	5	5	2	5	5	5	5	5	5	5	5	5	5
MB-5161	4	4	4	4	4	4	4	4	4	1	4	4	1	4	1	4	4	4	4	4	4	4	4	1	1
MB-5292	2	2	2	2	2	2	2	2	2	2	2	2	2	2	2	2	2	2	2	2	2	2	2	2	2
MB-5211	2	2	2	2	2	2	2	2	2	2	2	2	2	2	2	2	2	2	2	2	2	2	2	2	2
MB-5218	2	2	2	2	2	2	2	2	2	2	2	2	2	2	2	2	2	2	2	2	2	2	2	2	2
MB-5209	5	3	5	5	3	3	3	3	5	2	4	5	5	5	3	5	5	4	5	5	5	3	5	4	5
MB-5227	1	1	2	2	1	1	1	1	3	1	1	1	1	1	1	1	1	1	1	2	1	1	1	1	1
MB-5213	3	3	3	3	5	3	3	3	3	3	3	3	3	3	3	3	3	3	3	3	3	3	3	3	3
MB-5166	2	2	2	2	2	2	2	2	2	2	2	2	2	2	2	2	2	2	2	2	2	2	2	2	2
MB-5163	1	1	1	1	1	1	1	1	1	2	1	1	2	1	1	1	1	1	1	1	1	1	1	1	2
MB-5188	5	5	5	5	4	5	5	5	5	3	3	5	5	3	5	5	5	5	3	5	5	5	5	3	5
MB-5143	1	1	1	1	1	1	1	1	1	1	1	1	1	1	1	1	1	1	1	1	1	1	1	1	1
MB-5329	INC	3	3	3	5	3	3	1	4	4	1	1	1	3	5	1	1	1	1	3	2	1	1	3	2
MB-5322	1	1	1	1	1	1	1	1	1	2	1	1	1	1	1	2	1	1	1	1	1	1	1	1	1
MB-5310	1	1	1	1	1	1	1	1	1	1	1	1	1	1	1	1	1	1	1	1	1	1	1	1	2
MB-4000	1	1	1	1	1	1	1	1	1	1	1	1	1	1	1	1	1	1	1	1	1	1	1	1	1
MB-5240	1	1	1	1	1	1	1	1	1	1	1	1	1	1	1	1	1	1	1	1	1	1	1	1	1
MB-5228	2	2	2	2	2	2	2	2	2	2	2	2	2	2	2	1	2	2	1	2	2	2	2	2	2
MB-5136	1	1	1	1	1	1	1	1	1	1	1	1	1	1	1	1	1	1	1	1	4	1	1	1	1
MB-5140	2	2	2	2	1	2	2	2	1	1	2	2	2	2	2	2	1	2	2	2	2	2	2	2	2
MB-5106	2	2	2	2	2	2	2	2	2	2	2	2	2	2	2	2	1	2	2	2	2	2	2	2	2
MB-5117	1	1	1	1	1	1	1	1	1	1	2	1	1	1	1	1	2	1	5	1	1	1	1	1	1
MB-5104	1	1	1	1	1	1	1	1	1	1	1	1	1	1	1	1	1	1	1	1	1	1	1	1	1
MB-5131	1	1	1	1	1	1	1	1	1	1	1	1	1	1	1	1	1	1	1	1	1	1	1	1	1
MB-5109	1	4	4	4	3	4	1	1	4	1	1	4	1	1	3	1	1	1	4	4	1	1	1	1	1
MB-5176	2	2	2	2	2	2	2	2	1	1	1	2	2	2	2	1	1	1	2	2	3	2	1	2	2
MB-5158	1	1	1	1	1	1	1	1	1	1	1	1	1	1	1	1	1	1	1	1	1	1	1	1	1
MB-5076	5	5	5	5	5	5	5	5	5	5	5	5	5	5	5	5	5	5	5	5	5	5	5	5	5
MB-5215	2	2	2	2	1	1	2	1	2	2	2	2	1	2	1	1	1	1	2	2	2	2	1	2	1
MB-5223	5	4	5	5	5	4	4	5	5	4	5	5	5	5	5	5	1	5	5	5	5	4	5	5	4
MB-5179	1	1	1	1	1	1	1	1	1	1	1	1	1	1	1	1	1	1	1	1	1	1	1	1	1
MB-5330	1	1	1	1	1	1	1	1	1	1	1	1	1	1	1	1	1	1	1	1	1	1	1	1	1
MB-5144	2	2	2	2	2	2	2	2	2	2	1	2	2	2	2	2	1	1	2	2	1	2	2	3	2
MB-5196	2	2	2	2	2	2	2	2	1	2	1	2	2	2	2	2	1	1	1	2	1	2	1	1	2
MB-5200	2	2	2	2	2	2	2	2	2	2	2	2	2	2	2	2	2	2	2	2	2	2	2	2	2
MB-5583	1	1	1	1	1	1	1	1	1	1	1	1	1	1	1	1	1	1	1	1	1	1	1	1	1
MB-5601	1	1	1	1	1	1	1	1	2	1	2	1	1	1	1	1	1	1	1	1	2	1	1	1	1
MB-5632	2	2	2	2	2	2	2	2	2	2	2	2	2	2	2	2	1	2	2	2	2	2	2	2	2
MB-5616	5	5	5	5	5	5	5	5	5	5	5	5	5	5	5	5	3	5	5	5	5	5	5	5	5
MB-5604	2	2	2	2	2	2	2	2	2	2	2	2	2	2	2	2	2	2	2	2	2	2	2	2	2
MB-5589	1	1	1	1	1	1	1	1	1	1	1	1	1	1	1	1	1	1	1	1	1	1	1	1	1
MB-5582	1	1	1	1	1	1	1	1	1	1	1	1	1	1	1	1	1	1	1	1	1	1	1	1	1
MB-5625	5	5	5	5	5	5	5	5	5	5	5	5	5	5	5	5	5	5	5	5	5	5	5	5	5
MB-5571	1	1	2	2	2	1	1	1	1	1	1	1	1	1	1	1	1	2	1	2	1	1	1	1	1
MB-5596	1	1	1	1	1	1	1	1	1	1	1	1	1	1	1	1	1	1	1	1	1	1	1	1	1
MB-5590	2	2	2	2	2	2	2	2	2	1	2	2	2	2	2	2	1	2	2	2	2	2	2	2	2
MB-5599	1	1	1	1	1	1	1	1	1	1	1	1	1	1	1	1	1	1	1	1	1	1	1	1	1
MB-5629	1	2	2	1	1	1	1	1	1	1	1	2	2	2	1	1	1	1	2	2	1	1	2	1	2
MB-5579	1	1	1	1	1	1	1	1	1	1	1	1	1	1	1	1	1	1	1	1	1	1	1	1	1
MB-5623	2	2	2	2	2	1	1	1	2	2	2	2	2	2	1	1	2	2	2	2	1	1	1	2	2
MB-5654	2	2	2	2	2	1	2	2	1	1	1	2	2	1	1	1	1	2	2	2	1	2	1	1	2
MB-5617	1	1	1	1	1	1	1	1	1	1	1	1	1	1	1	1	1	1	1	1	1	1	1	1	1
MB-5638	1	2	1	1	1	1	1	1	1	1	3	1	1	1	1	1	1	1	2	1	2	1	1	2	1
MB-5635	1	1	1	1	3	1	1	1	3	2	1	1	1	1	3	1	2	1	1	1	1	3	1	4	3
MB-5642	1	1	1	1	1	1	1	1	1	1	1	1	1	1	1	1	1	1	1	1	1	1	1	1	1
MB-5647	1	1	1	1	1	1	1	1	2	2	1	1	1	1	1	1	1	1	1	1	1	1	1	1	1
MB-4018	1	1	1	1	1	1	1	1	1	1	1	1	1	1	1	1	1	1	1	1	1	1	1	1	1
MB-5584	2	2	2	2	2	2	2	2	2	2	2	2	2	2	2	2	3	2	2	2	2	2	2	2	2
MB-5626	1	1	1	1	1	1	1	1	1	1	1	1	1	1	1	1	1	1	1	1	1	1	1	1	1
MB-5602	3	5	3	3	3	3	3	3	3	3	3	3	3	3	3	3	3	3	3	3	3	3	3	3	3
MB-5653	2	2	2	2	1	1	1	2	2	2	1	1	1	1	1	1	1	2	2	2	2	2	2	2	1
MB-5576	2	2	2	2	2	2	2	2	2	2	3	2	2	2	2	2	1	2	2	2	2	2	2	2	2
MB-5575	2	2	2	2	2	2	2	2	2	2	2	2	2	2	2	2	1	2	2	2	2	2	2	2	2
MB-5646	1	2	2	2	2	1	1	2	1	1	2	1	1	1	2	1	1	1	2	2	1	2	1	2	1
MB-5634	5	5	5	5	5	5	5	5	5	5	5	5	5	5	5	5	5	5	5	5	5	5	5	5	5
MB-5591	1	1	1	1	1	1	1	1	1	1	2	1	1	1	1	1	1	1	1	1	1	1	1	1	1
MB-5567	1	1	1	1	1	1	1	1	1	1	1	1	1	1	1	1	1	1	1	1	1	1	1	1	2
MB-5651	5	5	5	5	5	5	5	5	5	5	5	5	5	5	5	3	3	5	5	5	5	5	5	5	3
MB-5603	1	1	1	1	1	1	1	1	1	1	1	1	1	1	1	1	1	1	1	1	1	1	1	1	1
MB-5622	2	2	2	2	2	2	2	2	2	2	2	1	2	2	2	2	1	1	1	2	1	2	1	1	1
MB-5597	1	1	1	1	1	1	1	1	1	1	1	1	1	1	1	1	1	1	1	1	1	1	1	1	1
MB-5613	2	2	2	2	2	2	2	2	2	2	2	2	2	2	2	2	3	2	2	2	2	2	2	2	2
MB-5580	1	1	1	1	1	1	1	1	1	1	1	1	1	1	1	1	1	1	1	1	1	1	1	1	1
MB-5645	1	1	1	1	1	1	1	1	2	1	1	1	1	1	2	1	2	1	1	1	2	1	1	2	1
MB-5548	5	5	5	5	5	5	5	5	5	5	5	5	5	5	5	5	5	5	5	5	5	5	5	5	5
MB-5526	5	5	5	5	5	5	5	5	5	5	5	5	5	5	5	5	5	5	5	5	5	5	5	5	5
MB-5531	5	5	5	5	5	5	5	5	5	5	5	5	5	5	5	5	5	5	5	5	5	5	5	5	5
MB-5468	5	5	5	5	5	5	5	5	5	5	5	5	5	5	5	5	5	3	5	5	5	5	5	5	5
MB-5474	INC	4	3	3	5	4	5	5	5	5	3	5	5	5	5	4	3	1	4	3	3	5	5	4	3
MB-5514	1	1	1	1	1	1	1	1	1	1	1	1	1	2	1	1	1	1	1	1	1	1	1	1	1
MB-5302	INC	1	4	4	4	1	4	1	1	2	4	1	1	4	1	1	1	1	4	4	2	4	5	2	4
MB-5510	1	1	1	1	1	1	1	1	1	1	1	1	1	1	1	1	1	1	1	1	1	1	1	1	1
MB-5473	1	1	1	1	1	1	1	1	1	1	1	1	1	1	1	1	1	1	1	1	1	1	1	1	1
MB-5484	1	1	1	1	1	1	1	1	1	1	1	1	1	1	1	1	1	1	1	1	1	1	1	1	1
MB-5432	1	1	1	1	1	1	1	1	1	1	1	1	1	1	1	1	1	1	1	1	1	1	1	1	1
MB-5525	2	2	2	2	2	2	2	2	1	2	2	2	2	2	2	2	2	2	2	2	2	2	2	2	2
MB-5562	2	2	2	2	1	2	1	1	2	1	2	2	1	2	2	2	2	1	1	2	1	1	2	2	2
MB-5497	2	2	2	2	2	2	2	2	2	2	2	2	2	2	2	2	1	2	2	2	1	2	2	1	1
MB-5551	5	5	5	5	5	5	5	5	5	5	5	5	5	5	5	5	5	5	5	5	5	5	5	5	5
MB-5300	1	1	1	1	1	1	1	1	1	1	1	1	1	1	1	1	1	1	1	1	1	1	1	1	1
MB-5560	5	5	5	5	5	5	5	5	5	5	5	5	5	5	5	5	5	3	5	5	5	5	5	5	5
MB-5550	1	1	1	1	1	1	1	1	1	1	1	1	1	1	1	1	1	1	1	1	2	1	1	2	1
MB-5520	1	2	2	2	2	1	1	1	2	2	1	2	1	2	1	2	1	1	1	2	1	1	1	1	1
MB-5529	5	5	5	5	5	5	5	5	5	5	5	5	5	5	5	5	5	5	5	5	5	5	5	5	5
MB-5554	1	1	1	1	1	1	1	1	2	2	1	1	1	1	2	1	1	2	1	1	2	1	1	2	2
MB-5301	3	3	3	3	3	3	3	3	3	3	3	3	3	1	3	1	1	1	3	3	3	3	3	3	4
MB-4421	1	1	1	1	1	1	1	1	1	1	1	1	1	1	1	1	1	1	1	1	2	1	1	2	2
MB-4408	5	5	5	5	5	5	5	5	5	5	5	5	5	5	5	5	3	5	5	5	5	5	5	5	5
MB-4146	5	5	5	5	5	5	5	5	5	5	5	5	5	5	5	5	1	5	5	5	5	5	5	4	5
MB-5534	2	3	3	3	2	2	2	2	1	2	1	2	2	2	4	2	1	1	2	3	1	2	2	2	1
MB-5521	1	1	2	2	1	2	1	2	2	1	2	2	2	1	1	1	1	1	1	2	1	1	1	1	2
MB-5482	5	5	5	5	5	5	5	5	5	5	5	5	5	5	5	5	5	5	5	5	5	5	5	5	5
MB-5483	3	3	3	3	3	3	3	3	3	3	3	3	3	3	3	3	3	1	3	3	3	3	3	5	3
MB-5532	1	2	2	2	1	1	1	1	2	1	1	1	1	1	1	1	2	1	1	2	1	2	2	2	2
MB-5556	2	2	2	2	2	2	2	2	1	2	2	2	2	2	2	2	2	2	2	2	2	2	2	2	2
MB-5518	2	2	2	2	2	2	2	2	1	1	2	2	2	2	2	2	2	2	2	2	2	2	2	2	2
MB-5486	2	2	2	2	2	2	2	2	1	1	2	2	2	2	2	2	1	2	2	2	1	2	2	2	2
MB-5511	3	3	3	3	3	3	3	3	3	3	1	3	3	3	3	3	5	3	3	3	3	3	3	3	3
MB-5422	1	1	1	1	1	1	1	1	1	1	1	1	1	1	1	1	1	1	1	1	1	1	1	1	1
MB-5535	3	3	3	3	3	3	3	3	3	3	3	3	3	3	3	3	5	3	5	3	3	3	3	3	3
MB-5477	2	2	2	2	2	2	2	2	2	2	2	2	2	2	2	2	2	2	2	2	2	2	2	2	2
MB-5472	1	1	1	1	1	1	1	1	1	1	1	1	1	1	1	1	1	1	1	1	1	1	1	1	1
MB-5540	2	2	2	2	2	2	2	2	2	2	2	2	2	2	2	2	2	2	2	2	2	2	2	2	2
MB-5184	1	1	1	1	1	1	1	1	1	1	1	1	1	1	1	1	1	4	1	1	1	1	1	1	1
MB-5294	5	5	5	5	5	5	5	5	5	5	5	5	5	5	4	5	5	5	5	5	5	5	5	5	5
MB-5565	5	5	5	5	5	5	5	5	5	5	5	5	5	5	5	5	5	5	5	5	5	5	5	5	5
MB-5040	2	2	2	2	2	2	2	2	2	1	2	2	2	2	2	2	2	1	2	2	2	2	2	1	2
MB-4801	1	1	1	1	1	1	1	1	1	1	1	1	1	1	1	1	1	1	1	1	1	1	1	1	1
MB-5499	1	1	1	1	1	1	1	1	1	1	1	1	1	1	1	1	1	1	1	1	1	1	1	1	1
MB-5459	2	2	2	2	2	2	2	2	2	2	2	2	2	2	2	2	2	2	2	2	2	2	2	2	2
MB-5243	1	2	1	1	1	1	1	1	1	2	1	2	1	1	1	2	2	1	1	1	1	2	2	2	2
MB-4120	1	1	1	1	1	1	1	1	1	1	1	1	1	1	1	1	1	1	1	1	1	1	1	1	1
MB-4966	1	1	1	1	1	1	1	1	1	1	1	1	1	1	1	1	3	1	4	1	1	1	1	1	1
MB-5457	1	1	1	1	1	1	1	1	1	1	1	1	1	1	1	1	1	1	1	1	1	1	1	1	1
MB-4011	1	1	2	2	1	1	1	1	1	1	1	1	1	1	1	1	1	1	1	2	1	1	1	3	1
MB-5478	1	1	1	1	1	1	1	1	1	1	1	1	1	1	1	1	1	1	1	1	1	1	1	1	1
MB-4822	1	1	1	1	1	1	1	1	1	1	1	1	1	1	1	1	1	1	1	1	1	1	1	1	1
MB-4017	2	2	2	2	2	2	2	2	2	2	2	2	2	2	2	2	2	2	2	2	2	2	2	2	2
MB-5018	1	2	1	1	1	1	1	1	2	1	1	1	1	1	1	1	1	2	1	1	2	1	1	1	1
MB-4791	2	2	2	2	2	2	2	2	2	2	2	2	1	2	1	2	2	2	1	2	2	2	2	2	2
MB-5118	1	1	1	1	1	1	1	1	1	1	1	1	1	1	1	1	1	1	1	1	1	1	1	1	1
MB-4806	1	1	1	1	1	1	1	1	1	1	1	1	1	1	1	1	1	1	1	1	1	1	1	1	1
MB-4970	2	2	2	2	2	2	2	2	2	2	2	2	2	2	2	2	1	2	2	2	1	2	2	2	2
MB-2964	1	3	3	3	1	1	1	1	1	1	1	1	1	1	1	1	1	3	3	3	1	1	1	3	2
MB-2963	1	1	1	1	1	2	1	2	1	1	5	4	1	3	5	1	3	1	3	1	4	1	1	2	3
MB-2957	5	5	5	5	5	5	5	5	5	5	5	5	5	5	5	5	5	5	5	5	5	5	5	5	5
MB-2954	2	2	2	2	2	2	2	2	2	2	1	1	1	2	2	1	2	2	1	2	1	2	1	2	1
MB-2916	1	1	1	1	1	1	1	1	1	1	1	1	1	1	1	1	1	1	1	1	1	1	1	1	1
MB-2725	1	1	4	4	1	1	1	1	1	4	1	1	1	1	1	1	1	1	4	4	1	4	1	4	1
MB-2711	1	1	1	1	1	1	1	1	1	1	1	1	1	1	1	1	1	1	1	1	1	1	1	1	1
MB-2730	2	2	2	2	2	2	2	2	2	2	2	2	2	2	2	2	2	2	2	2	2	2	2	1	2
MB-2669	1	1	1	1	1	1	1	1	4	1	4	1	1	1	1	1	1	1	1	1	1	1	1	1	3
MB-2705	2	2	2	2	2	2	2	2	2	2	2	2	2	2	2	2	2	2	2	2	2	2	2	1	2
MB-2728	2	2	2	2	2	2	2	2	2	2	2	2	2	2	2	2	2	2	1	2	1	2	2	2	2
MB-2708	2	2	2	2	2	2	2	2	2	1	2	2	2	2	2	2	2	2	2	2	2	2	2	2	1
MB-2735	2	2	2	2	2	3	3	1	2	2	2	1	2	3	1	2	2	2	2	2	1	2	2	1	2
MB-3035	1	1	1	1	1	1	1	1	1	1	1	1	1	1	1	1	1	1	1	1	1	1	1	1	1
MB-3064	1	4	4	4	1	1	1	1	1	1	1	1	1	1	1	1	1	1	4	4	1	1	1	1	1
MB-3060	2	2	2	2	2	2	2	2	2	2	1	2	2	2	2	2	2	2	2	2	2	2	2	2	2
MB-3049	1	1	1	1	1	1	1	1	1	1	1	1	1	1	1	1	1	1	1	1	2	1	1	1	1
MB-3037	1	1	1	1	1	1	1	1	1	1	1	1	1	1	1	1	1	1	1	1	1	1	1	1	1
MB-3063	5	5	5	5	5	5	5	5	5	5	5	5	5	5	5	5	5	5	5	5	5	5	5	5	5
MB-3083	2	2	2	2	2	2	2	2	2	2	2	2	2	2	2	2	2	2	2	2	2	2	2	2	2
MB-3046	5	5	5	5	5	5	5	5	5	5	5	5	5	5	5	5	5	5	5	5	5	5	5	5	5
MB-3067	5	5	5	5	5	5	5	5	5	5	5	5	5	5	5	5	5	5	5	5	5	5	5	5	5
MB-3351	1	1	1	1	1	1	1	1	1	1	1	1	1	1	1	1	1	2	1	1	1	1	1	1	1
MB-3367	5	5	5	5	5	5	5	5	5	3	5	5	5	5	5	5	5	5	5	5	5	5	5	5	5
MB-3361	2	2	2	2	2	2	2	2	2	2	2	2	2	2	2	2	2	2	2	2	2	2	2	2	2
MB-3412	1	1	1	1	1	1	1	1	1	1	1	1	1	1	1	1	1	1	1	1	2	1	1	1	1
MB-3371	2	2	2	2	2	2	2	2	1	1	2	1	2	2	2	2	1	2	2	2	2	2	2	2	2
MB-3429	4	4	4	4	4	4	4	4	4	4	4	4	4	4	4	4	4	4	4	4	4	4	4	4	1
MB-3360	2	2	2	2	2	2	2	2	2	2	2	2	2	2	2	2	1	2	2	2	2	2	2	2	2
MB-3403	1	2	1	1	1	1	1	1	1	1	1	1	1	2	1	1	2	2	1	1	2	1	1	1	2
MB-3350	2	2	2	2	2	2	2	2	1	2	2	2	2	2	2	2	1	1	2	2	2	2	2	2	2
MB-3355	3	3	3	3	3	3	3	3	3	3	3	3	3	3	3	3	3	3	3	3	3	3	3	5	3
MB-3329	3	3	3	3	3	3	3	3	3	3	3	3	3	3	3	3	3	3	2	3	3	3	5	3	3
MB-3467	3	3	3	3	3	3	3	3	5	3	3	3	3	3	1	3	1	3	3	3	3	3	3	3	3
MB-3341	1	2	2	2	1	1	1	1	1	1	2	1	1	1	1	1	1	1	2	2	1	1	2	1	1
MB-3298	1	1	1	1	1	1	1	1	1	1	1	1	1	1	1	1	1	1	1	1	1	1	1	2	1
MB-3357	2	2	2	2	2	2	2	2	2	2	2	2	2	2	2	2	2	2	2	2	2	2	2	2	2
MB-3388	2	2	2	2	2	2	2	2	2	2	2	2	2	2	2	2	2	2	2	2	2	2	2	2	2
MB-3365	1	1	1	1	1	1	1	1	1	1	1	1	1	1	1	1	1	1	1	1	1	1	1	1	1
MB-2749	1	1	1	1	1	1	1	1	1	1	1	1	1	1	1	1	1	4	1	1	1	1	1	1	1
MB-2754	4	4	4	4	4	4	4	4	4	1	3	3	3	4	4	4	3	3	4	4	5	4	1	3	3
MB-2752	1	1	1	1	1	1	1	1	4	1	1	1	1	1	1	1	1	1	1	1	1	1	1	1	1
MB-2745	1	2	1	1	1	1	1	1	1	1	1	1	1	1	1	1	1	1	1	1	1	1	1	1	1
MB-2747	1	2	2	2	1	2	1	1	1	1	1	1	1	1	1	1	1	1	1	2	1	1	1	1	2
MB-2760	1	1	1	1	2	1	1	1	1	1	1	1	1	1	2	1	1	2	1	1	2	1	2	1	2
MB-2742	5	5	5	5	3	5	5	5	5	3	4	3	3	3	5	5	5	3	3	5	4	5	5	3	3
MB-2750	1	1	1	1	1	1	1	1	1	1	1	1	1	1	1	1	1	1	1	1	1	1	1	1	1
MB-2753	5	5	5	5	5	5	5	5	5	5	5	5	5	5	5	5	5	3	5	5	5	5	5	5	5
MB-2966	1	1	1	1	1	1	1	1	1	1	1	1	2	1	1	1	1	1	1	1	2	1	2	1	2
MB-2953	2	2	2	3	2	2	2	2	1	1	2	2	2	1	2	1	1	2	2	2	2	2	2	2	2
MB-2969	1	1	1	1	1	1	1	1	1	1	1	1	1	1	1	1	1	1	2	1	1	1	1	1	2
MB-3014	5	5	5	5	5	5	5	5	5	5	5	5	5	5	5	5	5	5	5	5	5	5	5	5	5
MB-2947	1	1	1	1	1	1	1	1	1	1	1	1	1	1	1	1	1	4	1	1	1	1	1	1	1
MB-2951	1	1	4	4	4	1	1	1	1	1	1	1	1	4	4	1	1	4	1	4	1	1	1	1	1
MB-2960	1	1	1	1	1	1	1	1	1	1	2	1	1	1	1	1	1	2	1	1	1	1	1	1	1
MB-2970	1	4	4	4	1	1	1	1	1	1	1	1	1	1	1	1	1	1	1	4	1	1	1	1	1
MB-2971	1	1	1	1	1	1	1	1	1	1	1	1	1	1	1	1	1	1	1	1	1	1	1	1	1
MB-2933	1	1	1	1	1	1	1	1	1	1	1	1	1	1	1	1	1	1	1	1	1	1	1	4	1
MB-3479	4	4	4	4	4	4	4	4	4	4	4	4	4	4	4	4	4	4	4	4	4	4	4	4	4
MB-3490	2	2	2	2	2	2	2	2	2	2	2	2	2	2	2	2	2	2	2	2	2	2	2	2	2
MB-3487	2	2	2	2	2	2	2	2	2	2	2	2	2	2	2	2	2	2	2	2	1	2	2	2	2
MB-3459	2	2	2	2	2	2	2	2	2	2	2	2	2	2	2	2	2	2	1	2	2	2	2	1	2
MB-3476	5	5	5	5	5	5	5	5	5	2	5	5	5	5	5	5	5	5	5	5	5	5	5	5	3
MB-3492	2	2	2	2	2	2	2	2	1	1	2	1	2	1	1	1	1	1	2	2	1	2	1	2	2
MB-3452	1	1	1	1	3	1	1	1	3	1	1	1	1	1	1	1	1	1	1	1	2	1	1	3	1
MB-3303	2	2	2	2	2	2	2	2	2	2	1	2	2	2	2	2	2	2	1	2	2	2	1	1	2
MB-3328	1	1	1	1	1	1	1	1	1	1	1	1	1	1	1	1	1	1	1	1	1	1	1	1	1
MB-3300	1	2	2	2	2	2	2	2	1	1	1	1	1	1	1	1	1	1	1	2	1	1	2	1	1
MB-3277	5	5	5	5	5	5	5	5	5	5	5	5	5	5	5	5	5	5	5	5	5	5	5	5	5
MB-3254	1	1	1	1	1	1	1	1	1	1	1	1	1	1	1	1	1	1	1	1	1	1	1	1	1
MB-3275	2	2	2	2	2	2	2	2	2	2	2	2	2	2	2	2	2	2	2	2	2	2	2	2	2
MB-3272	2	2	2	2	1	2	1	1	1	2	1	2	2	2	1	1	2	2	2	2	1	2	2	2	2
MB-3271	5	5	5	5	5	5	5	5	5	5	5	5	5	5	5	5	5	5	5	5	5	5	5	5	5
MB-3292	5	5	5	5	5	5	5	5	5	5	5	5	5	5	5	5	5	5	5	5	5	5	5	5	5
MB-3840	2	2	2	2	2	2	2	2	2	2	2	2	2	2	2	2	2	2	2	2	2	2	2	2	2
MB-2536	1	1	1	1	1	1	1	1	1	1	1	1	1	1	1	1	1	1	1	1	1	1	1	1	1
MB-2564	1	1	1	1	1	1	1	1	1	1	1	1	1	1	1	1	1	1	1	1	1	1	1	1	1
MB-2513	3	3	3	3	3	3	3	3	5	3	3	3	3	3	3	3	3	3	3	3	3	3	3	3	3
MB-2617	2	2	2	2	2	2	2	2	2	2	1	2	2	2	2	1	2	2	2	2	2	2	2	2	2
MB-2614	1	1	1	1	1	1	1	1	1	1	1	1	1	1	1	1	1	1	1	1	1	1	1	2	2
MB-2632	3	3	3	3	4	3	3	3	3	3	3	3	3	3	3	3	5	3	3	3	3	3	3	3	3
MB-2556	4	4	4	4	4	4	4	4	4	4	4	4	4	5	4	4	1	4	4	4	4	4	4	5	4
MB-2624	1	1	1	1	1	1	1	1	1	1	1	1	1	1	1	1	1	1	1	1	1	1	1	1	1
MB-2867	1	4	4	4	1	1	1	1	1	1	1	1	1	4	1	1	4	4	4	4	4	1	1	1	1
MB-2922	3	3	3	3	3	3	3	3	3	3	3	3	3	3	3	3	3	3	3	3	3	3	3	3	3
MB-2917	5	5	5	5	5	5	5	5	5	5	5	5	5	5	5	5	5	5	5	5	5	5	5	5	5
MB-2858	2	2	2	2	2	2	2	2	2	2	2	2	2	2	2	2	2	2	2	2	2	2	2	2	2
MB-2854	1	1	1	1	1	1	1	1	1	1	1	1	1	1	1	1	1	1	1	1	1	1	1	1	1
MB-2853	2	2	2	2	2	2	2	2	1	2	2	1	2	2	2	2	1	2	1	2	1	2	2	1	2
MB-3235	2	2	3	2	2	2	2	2	2	2	2	2	2	2	2	2	2	2	2	2	3	2	2	2	2
MB-3165	3	3	3	3	3	3	3	3	3	3	3	3	3	3	3	3	5	3	3	3	3	3	3	3	3
MB-3171	1	1	1	1	1	1	1	1	1	1	1	1	1	1	1	1	1	1	1	1	1	1	1	1	1
MB-3167	1	2	2	2	1	1	2	1	2	1	1	1	1	1	2	1	1	2	2	2	1	2	2	1	1
MB-3222	1	1	1	1	1	1	1	1	1	1	1	1	1	1	1	1	1	1	1	1	1	1	1	1	1
MB-3706	5	5	5	5	5	5	5	5	5	5	5	5	5	5	5	5	5	5	5	5	5	5	5	5	5
MB-3497	3	3	3	3	3	3	3	3	3	3	1	3	3	1	3	3	1	3	3	3	4	3	3	1	3
MB-3488	3	3	3	3	4	3	3	3	4	1	4	3	3	3	1	3	3	2	3	3	4	3	3	3	3
MB-3711	1	1	1	1	1	1	1	1	1	1	1	1	1	1	1	1	1	1	1	1	1	1	1	2	1
MB-3548	1	1	1	1	1	1	2	1	2	2	1	1	2	2	1	2	1	2	1	1	1	1	2	1	2
MB-3506	2	2	2	2	2	2	2	2	2	2	2	2	2	2	2	2	2	2	2	2	2	2	2	2	2
MB-3525	2	2	2	2	2	2	2	2	2	2	2	2	2	2	2	2	2	2	2	2	2	2	2	2	2
MB-3606	3	3	3	3	3	3	3	3	3	3	4	3	3	3	3	3	3	3	3	3	3	3	3	3	3
MB-3453	3	3	3	3	3	5	4	3	4	3	3	3	3	5	4	3	5	1	3	3	4	4	3	3	5
MB-3545	1	4	4	4	1	1	1	1	1	1	1	1	1	1	1	1	1	4	1	4	1	1	1	4	1
MB-3470	3	3	3	3	3	3	5	3	4	1	3	3	3	3	3	3	5	3	5	3	4	4	3	4	3
MB-2765	1	1	1	1	1	1	1	1	1	1	1	1	1	1	1	1	1	1	2	1	1	1	1	1	1
MB-2763	INC	1	2	2	2	2	2	2	1	1	1	1	2	1	2	1	1	1	2	2	2	2	1	1	1
MB-2767	2	2	2	2	2	2	2	2	2	2	2	2	2	2	2	2	2	2	2	2	2	2	2	2	2
MB-2790	1	2	1	1	1	1	1	1	1	1	1	2	1	1	1	1	2	1	1	1	1	1	1	1	2
MB-2769	2	1	1	1	2	2	2	2	2	2	2	2	1	2	2	2	2	2	1	1	2	2	2	2	2
MB-2842	5	5	5	5	5	5	5	5	5	5	5	5	5	5	5	5	3	5	5	5	5	5	5	5	5
MB-2772	2	2	2	2	2	2	2	2	2	2	2	2	2	2	2	2	1	2	2	2	1	2	2	2	2
MB-2779	1	1	1	1	1	1	1	1	1	1	1	1	1	1	1	1	2	1	1	1	1	1	1	1	1
MB-2774	2	2	2	1	2	1	2	1	1	2	2	2	1	2	2	2	2	2	2	2	1	2	1	1	2
MB-2983	2	2	2	2	2	2	2	2	2	2	2	2	2	2	2	2	2	2	2	2	2	2	2	2	2
MB-3005	1	1	1	1	1	1	1	1	1	1	1	1	1	1	1	1	1	1	1	1	1	1	1	1	1
MB-2977	1	1	1	1	1	1	1	1	1	1	1	1	1	1	1	1	1	1	1	1	1	1	1	1	1
MB-2996	1	1	1	1	1	1	1	1	2	2	1	1	1	1	1	1	1	2	1	1	1	1	1	1	1
MB-2999	2	2	2	2	1	1	1	1	2	1	2	2	2	2	1	1	1	2	2	2	2	1	1	1	2
MB-2994	1	1	1	1	1	1	1	1	1	1	1	1	1	1	1	1	2	2	1	1	1	1	1	4	1
MB-3025	3	3	3	3	3	3	3	3	3	3	3	3	3	3	3	3	3	3	3	3	3	3	3	3	3
MB-2984	2	2	2	2	2	2	2	2	2	2	2	2	2	2	2	2	2	2	3	2	2	2	2	2	2
MB-3002	1	4	4	1	2	1	1	1	1	1	2	1	2	1	2	1	1	1	1	4	1	1	1	1	1
MB-2845	1	4	4	4	1	1	1	1	1	1	1	1	1	1	1	1	1	1	1	4	1	1	1	1	1
MB-2912	5	5	5	5	5	5	5	5	5	5	5	5	5	5	5	5	5	5	5	5	5	5	5	5	5
MB-2844	2	2	2	2	3	2	2	2	2	2	2	2	2	2	2	2	2	2	2	2	2	2	2	2	2
MB-2847	3	3	3	3	3	3	3	3	3	2	3	3	3	3	3	3	5	3	3	3	3	3	3	2	3
MB-2849	INC	3	3	3	5	5	4	5	3	4	5	5	5	5	5	3	3	5	5	3	3	5	5	4	3
MB-2851	1	1	1	1	1	1	1	1	1	1	1	1	1	1	5	1	1	1	2	1	1	1	1	1	1
MB-2848	1	1	1	1	1	1	1	1	1	2	1	1	1	1	1	1	1	1	1	1	1	1	1	1	1
MB-2863	1	1	1	1	1	1	1	1	1	1	4	1	1	1	1	1	1	3	1	1	1	1	1	2	1
MB-2840	1	1	1	1	1	1	1	1	1	1	1	1	1	1	1	1	1	1	1	1	1	1	1	1	1
MB-2843	1	1	1	1	1	1	1	1	1	1	1	1	1	1	1	1	1	1	1	1	1	1	1	1	1
MB-3013	1	1	1	1	1	1	1	1	1	1	1	1	1	1	1	1	1	1	1	1	1	1	1	1	1
MB-3058	5	5	5	5	5	5	5	5	5	5	5	5	5	5	5	5	1	5	5	5	4	5	5	5	5
MB-3016	2	2	2	2	2	2	2	2	2	2	2	2	2	2	2	2	2	2	2	2	2	2	2	1	2
MB-3057	5	5	5	5	5	5	5	5	5	5	5	5	5	5	5	5	5	5	5	5	5	5	5	5	5
MB-3008	1	1	1	1	1	1	1	1	1	1	1	1	1	1	1	1	1	1	1	1	1	1	1	1	1
MB-3021	1	1	1	1	1	1	1	1	1	1	1	2	1	1	1	1	3	2	1	1	1	1	1	1	1
MB-3032	1	1	1	1	1	1	1	1	1	1	4	1	1	1	1	1	1	4	1	1	2	1	1	1	1
MB-3007	2	2	2	2	2	2	2	2	2	2	1	2	2	2	2	2	1	2	1	2	2	2	2	2	2
MB-3033	1	1	1	1	1	1	1	1	1	1	1	1	1	1	1	1	1	1	1	1	1	1	1	1	1
MB-3026	1	1	2	2	1	2	1	1	2	2	2	1	1	1	2	1	1	2	1	2	1	1	1	1	1
MB-3006	4	4	4	4	4	4	4	4	4	4	1	4	4	4	4	4	4	4	1	4	2	4	1	4	1
MB-3439	1	1	1	1	1	1	1	1	1	1	1	1	1	1	1	1	1	1	1	1	1	1	1	1	1
MB-3437	2	2	2	2	1	1	1	1	2	2	1	1	2	2	1	2	2	1	2	2	2	1	1	2	2
MB-3395	5	5	5	5	5	5	5	5	5	5	5	5	4	5	5	5	1	4	5	5	5	5	5	5	5
MB-3386	3	3	3	3	5	3	3	3	3	3	3	3	3	3	5	3	3	3	3	3	3	3	3	3	3
MB-3382	2	2	2	2	2	2	2	2	2	2	2	2	2	2	2	2	2	2	2	2	2	2	2	3	1
MB-3379	1	1	1	1	1	1	1	1	1	1	1	1	1	1	1	1	1	1	1	1	1	1	1	1	1
MB-3430	1	1	1	1	1	1	1	1	1	1	1	1	1	1	1	1	1	1	1	1	1	1	1	1	1
MB-3389	2	2	2	2	2	2	2	2	2	2	3	2	2	2	2	2	2	2	2	2	2	2	2	2	2
MB-3378	1	1	1	1	1	1	1	1	1	1	1	1	1	1	1	1	1	1	1	1	1	1	1	1	1
MB-3110	1	1	1	1	1	1	1	1	1	1	1	1	1	1	1	1	1	1	1	1	1	1	1	1	1
MB-3079	1	1	1	1	1	1	1	1	1	1	1	1	1	1	1	1	1	1	1	1	1	1	1	1	1
MB-3103	2	2	2	2	2	2	2	2	2	2	2	2	2	2	2	2	1	2	1	2	2	2	2	2	2
MB-3102	1	2	2	2	1	1	2	2	1	1	2	2	1	2	1	1	1	1	1	2	2	1	1	1	1
MB-3085	4	4	4	4	4	4	4	4	4	4	4	4	1	1	1	4	4	4	1	4	4	4	4	4	4
MB-3122	INC	3	3	3	3	3	3	3	3	2	2	2	2	3	3	2	2	2	2	3	2	3	2	2	2
MB-3104	1	1	1	1	4	1	1	1	1	1	4	1	1	1	1	1	1	1	1	1	1	1	1	5	1
MB-3123	5	5	5	5	5	5	5	5	5	5	5	5	5	5	5	5	3	5	5	5	5	5	5	5	5
MB-3121	1	1	1	1	1	2	1	1	1	1	1	1	1	1	1	1	1	1	1	1	1	1	1	2	1
MB-2835	1	1	1	1	1	1	1	1	1	1	1	1	1	1	1	1	1	1	1	1	2	1	1	1	1
MB-2838	1	1	1	1	1	1	1	1	1	1	1	1	1	1	1	1	1	1	1	1	1	1	2	2	1
MB-2801	1	2	1	1	1	1	1	1	1	1	1	1	1	1	2	1	1	1	2	1	3	1	1	1	1
MB-2834	3	3	3	3	3	3	3	3	3	3	3	3	3	3	3	3	3	3	3	3	3	3	3	3	3
MB-2796	2	2	1	1	2	2	2	2	1	1	2	2	2	1	2	1	2	2	2	1	2	2	2	2	1
MB-2857	5	5	5	5	5	5	5	5	5	5	5	5	5	5	5	5	5	5	5	5	5	5	5	5	5
MB-2819	1	1	1	1	1	1	1	1	2	1	1	1	1	1	1	1	1	1	1	1	1	1	1	1	1
MB-2781	INC	2	2	2	1	1	1	1	2	2	2	1	1	2	1	2	1	1	2	2	4	1	2	1	2
MB-2793	1	1	2	2	1	2	2	2	1	1	1	1	1	2	2	1	2	1	2	2	1	2	1	1	1
MB-2827	5	5	5	5	5	5	5	5	5	5	5	5	5	5	5	5	5	5	5	5	5	5	5	5	5
MB-2814	2	2	2	2	2	2	2	2	1	1	2	2	2	2	2	2	2	2	2	2	2	2	2	2	2
MB-2791	1	1	1	1	1	1	1	1	1	1	1	1	1	1	1	1	1	1	1	1	1	1	1	1	1
MB-2803	2	2	2	2	2	2	2	2	2	2	2	2	2	2	2	2	2	2	2	2	2	2	2	2	2
MB-2797	1	1	1	1	1	1	1	1	1	2	4	1	1	1	1	1	4	1	1	1	1	1	1	1	1
MB-2795	1	1	1	1	1	1	2	1	1	1	2	1	1	1	2	1	1	4	2	1	1	1	1	1	1
MB-2786	1	1	1	1	1	1	1	1	1	1	2	1	1	1	1	1	1	1	1	1	1	1	1	1	1
MB-3850	1	1	1	1	1	1	1	1	1	1	1	1	1	1	1	1	1	1	1	1	1	1	1	1	1
MB-3556	3	3	3	3	3	3	3	3	3	3	3	3	3	3	3	3	3	3	3	3	3	3	3	3	3
MB-3838	2	2	2	2	2	2	2	2	1	2	1	2	2	2	2	2	2	2	2	2	2	2	2	2	2
MB-3707	1	1	1	1	1	1	1	2	1	2	1	1	2	1	1	1	1	1	1	1	1	2	1	4	1
MB-3600	2	2	2	2	2	2	2	2	2	2	2	2	2	2	2	2	2	2	2	2	2	2	2	2	2
MB-3824	2	2	2	2	2	2	2	2	2	2	2	2	2	2	2	2	2	2	2	2	2	2	2	2	2
MB-3823	1	1	1	1	1	1	1	1	1	1	1	1	1	1	1	1	1	1	1	1	1	1	1	1	1
MB-3781	1	1	1	1	1	1	1	1	1	2	2	1	1	1	1	1	1	1	1	1	1	1	1	2	1
MB-2642	2	2	2	2	2	2	2	2	2	2	2	2	2	2	2	2	2	2	2	2	2	2	2	2	2
MB-2686	2	2	3	2	3	2	2	2	2	2	2	2	2	2	2	2	2	2	2	3	2	2	2	2	2
MB-2616	4	4	4	4	4	4	4	4	4	1	4	4	4	4	4	4	4	4	4	4	4	4	4	4	4
MB-2634	2	2	2	2	2	2	2	2	2	2	2	2	2	2	2	2	2	2	2	2	2	2	2	2	2
MB-2613	2	2	2	2	2	2	2	2	2	2	2	2	2	2	2	2	2	2	2	2	2	2	2	2	2
MB-3842	2	2	2	2	4	2	2	2	2	2	2	2	2	2	2	2	2	2	2	2	2	2	2	2	2
MB-3866	3	3	3	3	3	3	3	3	3	3	3	3	3	3	3	3	3	3	3	3	3	3	3	3	3
MB-3874	1	1	1	1	1	1	1	1	1	1	1	2	2	1	1	1	2	1	1	1	2	1	1	1	1
MB-3871	1	1	1	1	1	1	1	1	1	1	1	1	1	1	1	1	1	1	1	1	1	1	1	1	1
MB-3702	5	4	5	5	4	4	5	5	4	4	5	5	5	5	4	5	5	5	5	5	3	5	5	5	5
MB-3105	1	1	1	1	1	1	1	1	1	1	1	1	1	1	1	1	1	1	1	1	1	1	1	1	1
MB-3852	INC	2	2	2	2	2	2	1	1	2	1	2	1	1	2	1	1	1	1	2	2	2	1	1	1
MB-3854	1	4	1	1	1	1	1	1	1	1	1	1	1	1	1	1	4	1	1	1	1	1	1	4	1
MB-3865	1	4	1	1	1	1	1	1	1	1	1	1	1	1	1	1	1	4	1	1	1	1	1	1	1
MB-3228	1	1	1	1	1	1	1	1	1	1	1	1	1	1	1	1	1	1	1	1	1	1	1	1	1
MB-3028	INC	2	3	3	2	2	2	1	2	1	1	3	2	1	1	1	1	1	1	3	1	3	1	2	3
MB-3502	5	5	5	5	5	5	5	5	5	5	5	5	5	5	5	5	5	5	5	5	5	5	5	5	5
MB-3567	5	5	5	5	5	5	5	5	5	5	5	5	5	5	5	5	5	5	5	5	5	5	5	5	5
MB-3752	5	5	5	5	5	5	5	5	5	5	5	5	5	5	5	5	5	5	5	5	5	5	5	5	5
MB-3450	1	1	1	1	1	1	1	1	1	1	1	1	1	1	1	1	1	1	1	1	1	1	1	1	1
MB-0444	2	2	2	2	2	2	1	1	1	1	1	2	2	1	2	2	2	1	2	2	1	1	1	2	1
MB-0476	4	4	4	4	4	4	4	4	4	4	4	4	4	4	1	4	4	4	4	4	4	4	4	4	3
MB-0610	1	1	1	1	1	1	1	1	1	1	1	1	1	1	1	1	1	1	1	1	1	1	1	4	1
MB-0451	1	4	4	4	1	1	1	1	1	1	1	1	1	1	1	1	1	1	1	4	1	1	1	1	1
MB-0133	1	1	4	4	1	1	1	1	1	1	1	1	1	1	1	1	1	1	1	4	1	1	1	1	1

## Sheet: Pred METABRIC Validation CM1
	Class	BayesNet	NaiveBayes	NaiveBayesUpdateable	Logistic	MultilayerPerceptron	SimpleLogistic	SMO	IBk	KStar	AttributeSelectedClassifier	Bagging	ClassificationViaRegression	LogitBoost	MultiClassClassifier	RandomCommittee	DecisionTable	JRip	PART	HoeffdingTree	J48	LMT	RandomForest	RandomTree	REPTree
MB-0005	2	2	2	2	2	2	2	2	2	1	1	2	1	2	2	2	2	2	1	2	1	2	1	2	2
MB-0048	4	4	4	4	2	5	4	4	5	1	3	4	1	4	4	1	1	4	4	4	3	4	1	4	1
MB-0025	2	2	2	2	2	2	2	2	2	2	2	2	2	2	2	2	2	2	2	2	2	2	2	2	2
MB-0083	1	1	1	1	2	1	1	1	1	1	2	1	1	1	2	1	1	1	1	1	2	1	1	1	1
MB-0053	2	2	2	2	2	2	2	2	2	2	2	2	2	2	2	2	2	2	2	2	2	2	2	2	2
MB-0056	2	2	2	2	2	2	2	2	2	1	2	2	2	2	2	2	2	2	2	2	2	2	2	2	2
MB-0068	1	1	1	1	1	1	1	1	1	1	1	1	1	1	1	1	1	1	1	1	1	1	1	1	1
MB-0093	2	2	2	2	2	2	2	2	1	2	2	2	2	2	2	2	1	2	4	2	2	2	1	1	1
MB-0079	3	3	3	3	3	2	3	3	3	3	3	3	3	3	3	3	3	3	3	3	3	3	3	3	3
MB-0108	2	2	2	2	2	2	2	2	1	2	2	2	2	4	2	2	1	1	4	2	2	2	2	1	1
MB-0006	1	2	2	2	1	1	1	2	1	1	1	1	1	2	2	1	2	2	2	2	1	1	1	1	1
MB-0014	1	1	1	1	1	1	1	1	1	1	1	1	1	1	1	1	1	2	1	1	1	1	1	1	1
MB-0022	1	1	1	1	2	1	1	1	1	1	1	1	1	1	2	1	1	2	1	1	1	1	1	1	1
MB-0039	2	2	2	2	2	2	2	2	2	2	1	1	1	2	2	2	2	2	1	2	1	2	1	1	1
MB-0062	5	5	5	5	4	5	5	5	5	5	5	5	5	5	2	5	5	5	5	5	5	5	5	5	5
MB-0054	2	2	2	2	2	2	2	2	2	2	1	2	2	2	2	2	2	2	2	2	1	2	1	2	1
MB-0081	1	4	4	4	2	2	1	1	1	1	4	1	1	2	2	1	1	1	5	4	4	1	1	1	1
MB-0071	2	3	2	2	2	2	2	2	2	2	2	2	2	2	2	2	1	2	2	2	2	2	2	2	2
MB-0099	1	1	1	1	2	2	2	2	1	1	2	1	1	2	2	1	1	1	2	1	2	2	1	1	1
MB-0064	2	2	2	2	2	2	2	2	2	2	1	2	2	2	2	2	2	2	2	2	1	2	2	2	2
MB-0107	2	2	2	2	2	2	2	2	2	2	2	2	2	2	2	2	2	2	2	2	2	2	2	2	2
MB-4681	1	1	1	1	1	1	1	1	1	1	1	1	1	1	1	1	1	1	1	1	1	1	1	1	1
MB-4626	1	1	1	1	1	1	1	1	1	1	1	1	1	1	1	1	2	1	1	1	1	1	1	1	1
MB-4639	2	2	2	2	2	1	2	2	1	1	2	2	2	2	2	2	1	1	2	2	2	2	2	2	2
MB-4673	2	2	2	2	2	2	2	2	2	2	2	2	1	2	2	2	2	2	2	2	2	2	1	1	2
MB-4711	3	3	3	3	3	3	3	3	5	5	5	5	3	3	5	3	3	3	5	3	5	3	1	3	3
MB-4607	1	1	1	1	1	1	1	1	1	1	1	1	1	1	1	1	1	1	1	1	1	1	1	1	1
MB-4669	2	2	2	2	2	2	2	2	2	2	2	2	2	2	2	2	2	2	2	2	2	2	2	2	2
MB-4015	3	3	3	3	5	3	3	3	3	3	3	3	3	5	5	3	3	3	3	3	3	3	3	3	5
MB-2931	1	1	1	1	1	1	1	1	1	1	1	1	1	1	1	1	1	2	1	1	1	1	1	1	1
MB-2927	1	1	1	1	1	1	1	1	1	1	1	1	1	1	1	1	1	1	1	1	1	1	1	1	1
MB-2919	1	1	1	1	1	1	1	1	1	1	1	1	1	1	1	1	1	1	1	1	1	1	1	1	1
MB-2944	1	1	1	1	1	1	1	1	2	1	1	1	1	1	1	1	1	1	1	1	1	1	1	1	1
MB-2929	3	3	3	3	3	3	3	3	3	1	3	3	3	3	3	3	3	3	3	3	3	3	1	3	3
MB-2932	2	2	2	2	2	2	2	2	2	2	2	2	2	2	2	2	2	2	2	2	2	2	2	2	2
MB-2724	4	4	4	4	4	4	5	5	4	4	4	4	5	4	4	4	1	4	3	4	4	5	4	5	5
MB-2712	1	1	1	1	1	1	1	1	1	1	1	1	1	1	1	1	1	1	1	1	1	1	1	1	1
MB-2720	1	2	2	2	1	1	1	1	1	2	2	1	2	2	1	1	1	2	2	2	1	1	1	1	1
MB-3062	5	5	5	5	5	5	5	5	5	5	5	5	5	5	5	5	5	5	5	5	5	5	5	5	5
MB-3050	2	2	2	2	1	2	2	2	2	1	2	1	2	2	2	2	2	2	2	2	2	2	2	1	2
MB-4722	1	1	1	1	1	1	1	1	1	1	1	1	1	1	1	1	1	1	1	1	1	1	1	1	1
MB-4731	3	3	3	3	3	3	3	3	3	3	3	3	3	3	3	3	1	3	3	3	3	3	3	3	3
MB-4725	2	2	2	2	1	1	2	2	2	2	2	2	2	2	2	2	2	2	2	2	2	2	3	2	2
MB-4707	5	5	5	5	5	5	5	5	5	5	5	5	5	5	5	5	5	5	5	5	5	5	5	5	5
MB-4643	3	3	3	3	3	3	3	3	3	3	3	3	3	3	3	3	3	3	3	3	3	3	3	3	3
MB-3363	5	5	5	5	3	5	5	5	5	2	5	5	5	5	2	5	3	5	5	5	5	5	3	3	5
MB-3383	5	5	5	5	5	5	5	5	5	5	5	5	5	5	5	5	3	5	5	5	5	5	5	5	5
MB-3344	1	1	1	1	1	1	1	1	1	1	1	1	1	1	1	1	1	1	1	1	1	1	1	1	1
MB-3381	1	1	1	1	1	1	1	1	1	1	1	1	1	1	1	1	1	1	1	1	1	1	1	1	1
MB-3297	5	5	5	5	5	5	5	5	5	5	5	5	5	5	4	5	3	5	5	5	5	5	5	5	5
MB-3301	INC	2	2	2	1	2	1	1	1	1	2	2	1	1	2	1	2	1	4	2	2	1	1	1	2
MB-3088	1	1	1	1	1	1	1	1	1	1	1	1	1	1	1	1	1	1	1	1	2	1	1	1	1
MB-2764	4	4	4	4	4	4	4	4	4	4	4	4	4	4	4	4	4	4	4	4	4	4	4	4	4
MB-2744	4	4	4	4	4	4	4	4	4	4	4	4	4	1	4	4	4	4	4	4	4	4	4	4	4
MB-7114	5	5	5	5	5	5	5	5	5	5	5	5	5	5	5	5	5	5	5	5	5	5	5	5	5
MB-7118	1	1	1	1	1	1	1	1	1	1	1	1	1	1	1	1	1	1	1	1	1	1	1	1	1
MB-7113	1	1	1	1	1	1	1	1	1	1	1	1	1	1	1	1	1	1	1	1	1	1	1	1	1
MB-7130	2	2	2	2	2	2	2	2	2	2	2	2	2	2	2	2	2	2	2	2	2	2	2	2	2
MB-7149	2	2	2	2	2	2	2	2	2	2	1	2	2	2	2	2	2	2	2	2	1	2	2	2	2
MB-7140	2	2	2	2	2	2	2	2	2	2	2	2	2	2	2	2	2	2	2	2	2	2	2	2	2
MB-7148	1	1	1	1	1	1	1	1	1	1	1	1	1	1	1	1	1	1	1	1	1	1	1	1	1
MB-7208	3	3	3	3	3	3	3	3	3	3	3	3	3	3	3	3	3	3	3	3	3	3	3	3	3
MB-7170	1	1	1	1	1	1	1	1	1	1	1	1	1	1	1	1	2	1	1	1	1	1	1	1	2
MB-7174	2	2	2	2	2	2	2	2	2	2	2	2	2	2	2	2	2	2	2	2	2	2	2	2	2
MB-7252	3	3	3	3	3	3	3	3	3	3	3	3	3	3	3	3	3	3	3	3	3	3	3	5	3
MB-7244	1	1	1	1	1	1	1	1	1	1	1	1	1	1	1	1	1	1	1	1	1	1	1	1	1
MB-7187	4	4	4	4	4	4	4	4	4	4	4	4	4	4	4	4	4	4	4	4	4	4	4	1	4
MB-7251	3	3	3	3	3	3	3	3	3	3	3	3	3	3	5	3	5	3	1	3	3	3	3	5	3
MB-7173	1	1	1	1	1	1	1	1	1	1	1	1	1	1	1	1	1	1	1	1	1	1	1	1	1
MB-3001	5	5	5	5	5	5	5	5	5	5	5	5	5	5	5	5	5	5	5	5	5	5	5	5	5
MB-2952	1	1	1	1	1	1	1	1	1	1	1	1	1	1	1	1	1	1	1	1	1	1	1	1	1
MB-7097	1	2	1	1	1	1	1	1	1	1	1	1	1	1	1	1	2	1	1	1	1	1	1	1	1
MB-7104	2	2	3	3	2	2	2	2	2	2	2	2	2	2	2	2	2	2	2	3	2	2	2	2	2
MB-7099	2	2	2	2	2	2	2	2	2	2	2	2	2	2	2	2	2	2	2	2	2	2	2	1	2
MB-7069	3	3	3	3	3	3	3	3	3	3	3	3	3	3	3	3	3	3	3	3	3	3	3	3	3
MB-7066	INC	4	4	4	4	1	1	1	4	4	1	1	3	1	1	4	4	3	1	4	1	1	1	1	3
MB-7100	2	2	2	2	2	2	2	2	1	1	2	2	1	2	2	2	2	2	2	2	2	2	2	2	2
MB-7067	3	3	3	3	5	5	3	3	3	3	3	5	3	3	5	3	3	3	5	3	3	3	3	3	5
MB-7073	3	3	3	3	3	3	3	3	3	3	5	3	5	3	5	3	5	3	3	3	5	3	3	3	3
MB-7063	1	1	1	1	1	1	1	1	1	1	1	1	1	1	1	1	1	1	1	1	1	1	1	1	1
MB-7102	2	2	2	2	2	2	2	2	2	1	2	2	2	2	1	2	1	2	1	2	2	2	1	2	1
MB-7068	2	2	2	2	3	2	2	2	2	2	2	2	2	2	2	2	2	2	2	2	2	2	2	2	2
MB-7075	2	2	2	2	2	2	2	2	2	2	2	2	2	2	2	2	2	2	2	2	2	2	2	2	2
MB-7053	1	1	1	1	1	1	1	1	1	1	1	1	1	1	1	1	1	1	1	1	1	1	1	1	1
MB-7074	1	1	1	1	1	1	1	1	1	1	1	1	1	1	1	1	1	4	1	1	1	1	1	1	1
MB-7057	4	4	4	4	4	4	4	4	4	4	4	4	4	4	4	4	5	4	4	4	4	4	4	4	4
MB-7109	2	2	2	2	2	2	2	2	2	2	2	2	2	2	2	2	2	2	2	2	2	2	2	2	2
MB-7051	2	2	2	2	2	2	2	2	2	1	2	2	2	2	2	2	2	2	2	2	2	2	2	2	2
MB-7071	2	2	2	2	2	1	2	2	2	1	2	1	2	1	2	2	2	1	2	2	2	2	1	1	2
MB-7106	1	1	1	1	1	1	1	1	1	1	1	1	1	1	1	1	1	1	1	1	1	1	1	1	1
MB-7059	3	3	3	3	3	3	3	3	3	3	3	3	3	3	3	3	3	3	3	3	3	3	3	3	3
MB-7107	1	1	1	1	1	1	1	1	1	2	2	1	1	2	1	1	2	1	1	1	2	1	1	2	1
MB-7076	1	2	1	1	2	2	1	1	2	1	1	1	1	1	1	1	2	1	2	1	1	1	1	1	1
MB-7111	INC	4	4	4	4	5	5	4	5	4	1	1	1	4	1	4	1	1	4	4	1	5	5	1	1
MB-7015	2	2	2	2	2	2	2	2	1	2	2	2	2	2	2	2	2	2	2	2	2	2	2	2	2
MB-7026	1	1	1	1	1	1	1	1	1	1	1	1	1	1	1	1	1	1	1	1	1	1	1	1	1
MB-7013	1	1	1	1	1	1	1	1	1	1	1	1	1	1	1	1	1	1	1	1	1	1	1	1	1
MB-7023	5	5	5	5	5	5	5	5	5	5	5	5	5	5	5	5	5	5	5	5	5	5	5	5	5
MB-7024	2	2	2	2	2	2	2	2	2	2	2	2	2	2	2	2	2	2	2	2	2	2	2	2	2
MB-7014	INC	3	3	3	2	2	2	2	1	1	1	1	3	3	2	1	2	1	1	3	1	2	1	1	1
MB-7017	5	5	5	5	5	5	5	5	5	5	5	5	5	5	5	5	5	5	5	5	5	5	5	5	5
MB-7019	1	1	1	1	1	1	1	1	1	1	1	1	1	1	1	1	1	1	1	1	1	1	1	1	1
MB-3510	1	1	1	1	1	1	1	1	1	1	1	1	1	1	1	1	1	1	1	1	1	1	1	1	1
MB-3500	5	5	5	5	5	5	5	5	5	5	5	5	5	5	5	5	5	5	5	5	5	5	5	5	5
MB-3396	3	3	3	3	5	3	3	3	3	3	3	3	5	3	5	3	3	3	3	3	5	3	3	3	5
MB-3435	3	3	3	3	3	3	3	3	3	2	3	3	3	3	3	3	3	3	3	3	3	3	3	3	3
MB-7186	2	2	2	2	2	2	2	2	2	2	2	2	2	2	2	2	2	2	2	2	2	2	2	2	2
MB-7142	2	2	2	2	2	2	2	2	1	2	1	2	2	2	2	2	2	1	2	2	1	2	2	3	2
MB-7196	2	2	2	2	2	2	2	2	2	2	2	2	2	2	2	2	2	2	2	2	2	2	2	2	2
MB-7171	2	2	2	2	2	2	2	2	2	2	1	2	2	2	2	2	2	2	2	2	1	2	1	2	2
MB-7145	5	5	5	5	5	5	5	5	5	5	5	5	5	5	5	5	5	5	5	5	5	5	5	5	5
MB-7132	1	1	1	1	1	2	1	1	1	2	1	1	1	1	1	1	2	1	1	1	2	1	1	2	1
MB-7189	2	2	2	2	2	2	2	2	2	2	2	2	2	2	2	2	2	2	2	2	2	2	2	2	2
MB-7137	1	1	1	1	1	1	1	1	1	1	1	1	1	1	1	1	1	1	1	1	1	1	1	1	1
MB-7181	2	2	2	2	2	2	2	2	2	1	1	1	2	2	2	1	1	1	1	2	1	2	1	2	1
MB-7155	5	5	5	5	5	5	5	5	5	5	5	5	5	5	5	5	5	5	5	5	5	5	5	5	5
MB-7138	2	2	2	2	2	2	2	2	2	2	2	2	2	2	2	2	2	2	2	2	2	2	2	2	2
MB-3295	4	4	4	4	4	4	4	4	4	1	4	1	4	1	4	1	1	1	4	4	4	4	4	1	1
MB-3218	5	5	5	5	5	5	5	5	5	5	5	5	5	5	5	5	5	5	5	5	5	5	5	5	5
MB-7232	1	1	1	1	1	1	1	1	1	1	1	1	1	1	1	1	1	1	1	1	1	1	1	1	1
MB-7281	3	3	3	3	3	3	3	3	3	3	3	3	3	3	3	3	3	3	4	3	3	3	3	3	4
MB-7270	3	3	3	3	5	3	3	3	3	3	3	3	3	3	5	3	5	3	3	3	3	3	3	5	3
MB-7231	1	1	1	1	1	1	1	1	1	1	1	1	1	1	1	1	1	1	1	1	1	1	1	1	1
MB-7220	1	1	1	1	1	1	1	1	1	1	1	1	1	1	1	1	1	1	1	1	1	1	1	1	1
MB-7277	1	1	1	1	1	1	1	1	1	1	1	1	1	1	1	1	1	1	1	1	1	1	1	1	1
MB-7269	5	5	5	5	4	5	5	5	5	5	5	5	5	5	5	5	5	5	5	5	5	5	5	5	5
MB-7280	1	1	1	1	1	1	1	1	1	1	1	1	1	1	1	1	1	1	1	1	1	1	1	1	1
MB-7227	1	1	4	4	1	1	1	1	3	3	1	1	1	1	4	1	1	1	1	4	1	1	1	1	1
MB-7278	1	1	1	1	1	1	1	1	1	1	1	1	1	1	1	1	1	1	1	1	1	1	1	1	1
MB-2610	1	1	1	1	1	1	1	1	1	1	1	1	1	1	1	1	1	1	1	1	1	1	1	1	1
MB-2517	3	3	3	3	3	3	3	3	3	3	3	3	3	3	3	3	3	3	5	3	3	3	3	3	3
MB-2896	1	1	1	1	1	1	1	1	1	1	1	1	1	1	1	1	1	1	1	1	1	1	1	1	1
MB-2901	2	2	2	2	2	2	2	2	2	2	2	2	2	2	2	2	2	2	2	2	2	2	2	2	2
MB-2895	3	3	3	3	4	3	5	3	5	3	5	3	3	3	3	3	3	3	5	3	3	5	3	3	3
MB-2900	4	4	4	4	4	4	4	4	4	4	4	4	4	4	4	4	1	4	4	4	4	4	4	4	4
MB-2939	2	2	2	2	2	2	2	2	2	2	2	2	2	2	2	2	2	2	2	2	2	2	2	2	2
MB-7008	4	4	4	4	4	4	4	3	3	3	1	4	3	4	4	4	3	4	4	4	1	4	4	3	3
MB-7002	1	1	1	1	1	1	1	1	2	1	1	1	1	1	1	1	1	2	1	1	1	1	2	2	1
MB-7000	2	2	2	2	2	2	2	2	2	1	2	1	2	2	2	2	2	2	2	2	2	2	2	2	1
MB-7006	1	1	1	1	1	1	1	1	1	1	1	1	1	1	1	1	1	1	1	1	1	1	1	1	1
MB-7007	5	5	5	5	5	5	5	5	3	3	5	5	5	5	5	5	5	5	3	5	5	5	5	3	5
MB-7011	2	2	2	2	2	2	2	2	2	2	2	2	2	2	2	2	2	2	2	2	2	2	2	2	2
MB-7001	1	1	1	1	1	1	1	1	1	1	2	1	1	1	1	1	1	1	1	1	2	1	1	1	1
MB-7009	5	5	5	5	5	5	5	5	5	5	5	5	5	5	5	5	5	5	5	5	5	5	5	5	5
MB-7003	1	1	1	1	1	1	1	1	1	1	2	1	1	1	1	1	1	1	1	1	2	1	1	1	1
MB-7005	1	1	1	1	1	1	1	1	1	1	1	1	1	1	1	1	1	1	1	1	1	1	1	1	1
MB-7010	1	1	1	1	1	1	1	1	1	1	1	1	1	1	1	1	1	1	1	1	1	1	1	1	1
MB-3153	3	3	3	3	5	3	3	3	3	3	3	5	3	3	3	3	3	3	3	3	3	3	3	5	5
MB-3211	5	5	5	5	5	5	5	5	5	5	5	5	5	5	5	5	5	5	5	5	5	5	5	5	5
MB-3181	2	2	2	2	2	2	2	2	1	2	2	2	2	2	2	2	2	2	2	2	2	2	2	2	2
MB-3252	1	4	1	1	1	1	1	1	1	4	1	1	1	1	1	1	1	1	1	1	1	1	1	1	1
MB-3266	1	2	1	1	1	1	1	1	1	2	1	2	2	1	1	2	2	2	1	1	1	1	2	2	2
MB-7082	3	3	3	3	3	3	3	3	3	3	3	3	3	3	3	3	3	3	3	3	3	3	3	5	3
MB-7081	5	5	5	5	5	5	5	5	5	5	5	5	5	5	5	5	5	5	5	5	5	5	5	5	5
MB-7093	1	1	1	1	1	1	1	1	1	1	1	1	1	1	1	1	1	1	1	1	1	1	1	1	1
MB-7083	2	2	2	2	2	2	2	2	2	2	2	2	2	2	2	2	2	2	2	2	2	2	2	2	2
MB-7091	1	1	1	1	1	1	1	1	1	1	1	1	1	1	1	1	1	1	1	1	1	1	1	1	1
MB-7065	1	1	2	2	1	1	1	1	1	2	1	1	1	1	1	1	2	1	2	2	1	1	1	2	2
MB-7085	1	1	1	1	1	1	1	1	1	1	1	1	1	1	1	1	1	1	1	1	1	1	1	1	1
MB-7096	1	1	1	1	1	1	1	1	1	1	1	1	1	1	1	1	1	1	1	1	1	1	1	1	1
MB-7018	1	1	1	1	2	1	1	1	1	1	1	1	1	1	1	1	1	2	1	1	1	1	1	1	1
MB-7088	3	3	3	3	2	2	2	3	3	2	3	3	3	3	3	3	3	5	3	3	3	2	2	3	3
MB-7055	5	3	5	5	5	5	5	5	3	3	5	3	5	3	5	3	5	3	2	5	5	5	3	3	5
MB-7080	1	1	1	1	1	1	1	1	1	1	1	1	1	1	1	1	1	1	1	1	1	1	1	1	1
MB-7161	1	1	1	1	1	1	1	1	1	1	1	1	1	1	1	1	1	1	1	1	1	1	1	1	1
MB-7115	2	2	3	3	3	2	2	2	3	2	2	2	2	2	2	2	2	2	2	3	2	2	2	2	2
MB-7123	1	1	1	1	1	1	1	1	1	1	1	1	1	1	1	1	1	1	1	1	1	1	1	1	1
MB-7176	2	2	2	2	2	1	1	1	1	2	2	1	1	1	1	2	2	1	2	2	2	1	2	2	1
MB-7121	5	5	5	5	5	5	5	5	5	5	5	5	5	5	5	5	5	4	5	5	5	5	5	5	5
MB-7172	1	2	2	2	2	1	1	1	1	1	2	1	1	1	1	2	1	2	4	2	2	1	1	1	2
MB-7164	1	1	1	1	1	1	1	1	1	1	1	1	1	1	1	1	1	1	1	1	1	1	1	1	1
MB-7127	1	1	1	1	1	1	1	1	1	1	1	1	1	1	1	1	1	1	1	1	1	1	1	1	1
MB-7128	1	1	1	1	1	1	1	1	1	1	1	1	1	1	1	1	1	1	1	1	1	1	1	1	1
MB-7157	2	2	2	2	2	2	2	2	2	2	1	2	2	2	2	2	2	2	1	2	1	2	2	2	2
MB-7092	2	2	2	2	2	2	2	2	2	2	2	2	2	2	2	2	2	2	2	2	2	2	2	2	2
MB-7135	3	3	3	3	3	3	3	3	3	3	3	3	3	3	3	3	3	3	3	3	3	3	3	3	3
MB-3754	2	2	2	2	2	2	2	2	2	2	1	2	2	2	2	1	2	1	4	2	1	2	1	2	1
MB-3536	1	1	4	4	1	1	1	1	3	1	1	1	1	1	1	1	1	1	1	4	1	1	1	1	1
MB-3748	1	1	1	1	1	1	1	1	1	1	1	1	1	1	1	1	1	1	1	1	2	1	1	1	1
MB-3530	2	2	2	2	2	2	2	2	1	2	2	2	2	2	1	1	2	2	2	2	1	2	2	1	2
MB-3582	4	4	4	4	4	4	4	4	4	1	4	4	4	1	4	4	1	1	4	4	4	4	4	1	1
MB-3528	3	3	3	3	3	3	3	3	3	3	3	3	3	3	3	3	3	3	3	3	3	3	3	3	3
MB-3547	1	1	1	1	1	1	1	1	1	1	4	1	1	1	1	1	1	1	4	1	4	1	1	1	1
MB-3576	2	2	2	2	2	2	2	2	2	2	2	2	2	2	2	2	2	2	2	2	2	2	2	2	2
MB-2770	1	1	1	1	1	1	1	1	1	1	1	1	1	1	1	1	1	1	1	1	1	1	1	1	1
MB-2758	INC	3	3	3	5	5	5	3	5	5	3	3	3	5	5	5	1	3	4	3	3	5	5	3	5
MB-2771	5	5	5	5	5	5	5	5	5	5	5	5	5	5	5	5	5	5	5	5	5	5	5	5	5
MB-7152	2	2	2	2	2	2	2	2	2	1	2	2	2	2	2	2	2	2	2	2	2	2	2	2	2
MB-7143	3	3	3	3	3	3	3	3	3	3	3	3	3	3	3	3	3	3	3	3	3	3	5	3	3
MB-7197	1	1	2	2	1	1	1	1	1	1	1	1	1	1	1	1	2	1	1	2	1	1	1	1	1
MB-7153	INC	3	3	3	2	1	3	3	1	2	1	2	3	3	3	2	1	2	1	3	1	3	1	1	1
MB-7144	2	2	2	2	2	2	2	2	1	1	2	2	2	2	2	2	2	2	2	2	2	2	2	2	2
MB-7185	1	1	1	1	1	1	1	1	1	1	1	1	1	1	1	1	1	1	1	1	1	1	1	1	1
MB-7199	2	2	2	2	2	2	2	2	2	2	2	2	2	2	2	2	2	2	2	2	2	2	2	2	2
MB-7158	5	5	5	5	5	5	5	5	5	5	4	5	5	5	5	5	3	5	5	5	4	5	5	4	5
MB-7163	1	1	1	1	1	1	1	1	1	1	1	1	1	1	1	1	1	1	1	1	1	1	1	1	1
MB-7215	1	1	1	1	1	1	1	1	1	1	1	1	1	1	1	1	1	1	1	1	1	1	1	1	1
MB-7200	1	1	1	1	1	1	1	1	1	1	1	1	1	1	1	1	2	2	1	1	1	1	1	1	1
MB-7193	2	2	2	2	2	2	2	2	2	2	2	2	2	2	2	2	2	2	2	2	2	2	2	2	2
MB-7188	1	1	1	1	1	1	1	1	1	1	1	1	1	1	1	1	1	1	1	1	1	1	1	1	1
MB-7198	INC	3	3	3	3	5	4	4	2	1	1	1	1	4	2	1	1	1	4	3	1	4	1	1	1
MB-7256	3	3	3	3	5	4	3	3	5	1	3	3	3	3	5	3	3	3	3	3	3	3	1	3	3
MB-7258	5	5	5	5	5	5	5	5	5	5	5	5	5	5	5	5	5	5	5	5	5	5	5	5	5
MB-7194	2	2	2	2	2	2	2	2	2	1	2	2	2	2	2	2	2	2	2	2	2	2	2	2	2
MB-7254	1	1	1	1	1	1	1	1	1	1	1	1	1	1	1	1	1	1	1	1	1	1	1	1	1
MB-7262	2	2	3	3	3	2	2	3	2	2	2	2	2	2	2	2	2	2	2	3	2	2	2	2	2
MB-2990	1	1	1	1	1	1	1	1	1	1	1	1	1	1	1	1	1	1	1	1	1	1	1	1	1
MB-2993	5	5	5	5	5	5	5	5	5	5	5	5	5	5	5	5	5	5	5	5	5	5	5	5	5
MB-3031	3	3	3	3	3	3	2	3	3	2	1	3	3	3	2	3	3	3	3	3	1	2	3	3	3
MB-2904	5	5	5	5	5	5	5	5	5	5	5	5	5	5	5	5	3	5	5	5	5	5	5	5	5
MB-2846	4	4	4	4	4	4	4	4	4	1	1	1	3	3	4	1	1	4	4	4	1	4	3	1	1
MB-7154	5	5	5	5	5	5	5	5	5	5	5	5	5	5	5	5	5	5	5	5	5	5	5	5	5
MB-7229	1	2	1	1	1	1	1	1	1	1	1	1	1	2	1	1	2	1	2	1	1	1	1	1	1
MB-7151	5	5	5	5	5	5	5	5	5	5	5	5	5	5	5	5	5	5	5	5	5	5	5	5	5
MB-7228	1	1	1	1	1	1	1	1	1	1	4	1	1	1	1	1	1	1	1	1	4	1	1	1	4
MB-7218	1	1	1	1	1	1	1	1	1	1	1	1	1	1	1	1	1	1	1	1	1	1	1	1	1
MB-7147	2	2	2	2	2	2	2	2	2	2	2	2	2	2	2	2	2	2	2	2	2	2	2	2	2
MB-7219	1	1	1	1	1	1	1	1	1	1	1	1	1	1	1	1	1	1	1	1	1	1	1	1	1
MB-7165	5	5	5	5	5	5	5	5	5	5	5	5	5	5	5	5	5	5	5	5	5	5	5	5	5
MB-7150	2	2	2	2	2	2	2	2	1	2	2	2	2	2	2	2	2	2	2	2	2	2	2	2	1
MB-3436	2	2	2	2	2	2	2	2	2	2	2	2	2	2	2	2	2	2	2	2	2	2	1	2	1
MB-3462	1	1	1	1	1	1	1	1	1	1	1	1	1	1	1	1	1	1	1	1	1	1	1	1	1
MB-3417	2	2	2	2	2	1	2	2	2	1	1	1	2	2	2	1	2	2	2	2	1	2	2	1	1
MB-2721	1	1	1	1	1	1	1	1	1	1	1	1	1	1	1	1	1	1	1	1	2	1	1	1	1
MB-3092	2	2	2	2	1	2	2	2	2	2	1	1	1	2	2	2	2	2	1	2	1	2	1	1	2
MB-2821	INC	4	4	4	5	5	5	4	4	4	5	4	5	5	5	3	3	4	5	4	5	5	4	5	5
MB-2850	5	5	5	5	5	5	5	5	5	5	5	5	5	5	5	5	5	5	5	5	5	5	5	5	5
MB-2820	1	1	1	1	1	1	1	1	1	1	1	1	1	1	1	1	1	1	1	1	1	1	1	1	1
MB-2823	4	4	4	4	4	4	4	4	1	4	1	1	1	1	1	1	1	4	4	4	1	4	4	1	1
MB-2792	2	2	2	2	2	2	2	2	3	3	2	2	2	2	2	1	1	2	4	2	2	2	2	3	2
MB-7273	3	3	3	3	3	3	3	3	3	3	3	3	3	3	3	3	3	3	3	3	3	3	3	3	3
MB-7283	1	1	1	1	2	2	1	2	2	1	1	1	2	2	1	1	1	1	1	1	1	1	1	1	1
MB-7284	1	1	1	1	1	1	1	1	1	1	1	1	1	1	1	1	1	1	1	1	1	1	1	1	1
MB-7279	2	2	2	2	2	3	3	3	2	2	2	2	3	2	3	2	2	2	2	2	2	3	2	3	3
MB-7233	1	1	1	1	1	1	1	1	1	1	1	1	1	1	1	1	1	1	2	1	1	1	1	1	1
MB-7287	2	2	2	2	2	2	2	2	2	2	2	2	2	2	2	2	2	2	2	2	2	2	2	2	2
MB-7250	3	3	3	3	3	3	3	3	3	3	3	3	3	3	3	3	4	3	3	3	3	3	3	3	3
MB-7238	2	2	2	2	2	2	2	2	2	2	2	2	2	2	2	2	2	2	2	2	2	2	2	2	2
MB-7285	1	1	1	1	1	2	1	1	1	2	2	2	1	1	2	2	1	1	1	1	2	1	2	1	2
MB-7260	2	2	2	2	3	2	2	2	2	2	2	2	2	2	2	2	2	2	2	2	2	2	2	3	2
MB-7264	1	1	1	1	1	1	1	1	1	1	4	1	1	4	1	1	1	1	1	1	4	1	1	1	1
MB-7268	1	1	1	1	1	1	1	1	1	1	1	1	1	1	1	1	1	1	4	1	1	1	1	1	1
MB-7276	1	1	1	1	1	1	1	1	1	1	1	1	1	1	1	1	1	1	1	1	1	1	1	1	1
MB-7212	1	4	4	4	1	1	1	1	4	4	4	1	1	1	1	4	1	1	4	4	4	1	4	1	1
MB-7267	5	5	5	5	5	5	5	5	5	5	5	5	5	5	5	5	5	5	5	5	5	5	5	5	5
MB-7266	1	1	1	1	2	2	2	2	1	1	1	1	1	1	2	1	2	2	2	1	1	2	1	1	1
MB-7216	1	1	1	1	1	1	1	1	1	1	1	1	1	1	1	1	1	1	1	1	1	1	1	1	1
MB-7195	1	1	1	1	1	1	1	1	1	1	1	1	1	1	1	1	1	1	1	1	1	1	1	1	1
MB-7201	3	4	4	4	3	3	3	3	3	3	3	3	3	4	3	3	3	4	3	4	3	3	4	3	4
MB-7217	1	1	1	1	1	1	1	1	1	1	1	1	1	1	1	1	1	1	1	1	1	1	1	1	1
MB-2815	1	4	4	4	1	1	1	1	4	4	4	1	1	1	1	1	1	1	4	4	4	1	1	1	1
MB-2833	5	5	5	5	4	5	5	5	5	5	5	5	5	5	4	5	1	4	5	5	5	5	5	3	5
MB-3614	2	2	2	2	2	2	2	2	2	2	2	2	2	2	2	2	2	2	2	2	2	2	2	2	2
MB-7052	5	5	5	5	5	5	5	5	5	2	3	5	5	5	5	5	5	5	5	5	3	5	3	5	5
MB-7124	1	1	1	1	1	1	1	1	1	1	1	1	1	1	1	1	2	2	1	1	1	1	1	1	1
MB-7122	INC	3	3	3	3	3	3	1	1	1	1	1	3	3	3	4	1	2	1	3	1	3	3	2	1
MB-7133	2	2	2	2	2	1	2	2	2	1	2	2	2	2	2	2	2	1	1	2	2	2	2	2	2
MB-7084	5	5	5	5	5	5	5	5	5	5	5	5	5	5	5	5	5	5	5	5	5	5	5	5	5
MB-7101	1	1	1	1	1	1	1	1	1	1	1	1	1	1	1	1	1	1	1	1	1	1	1	1	1
MB-7116	2	2	2	2	2	2	2	2	1	1	3	1	1	1	2	1	2	1	2	2	3	2	1	2	2
MB-7131	2	2	2	2	2	2	2	2	2	2	2	2	2	2	2	2	2	2	2	2	2	2	2	2	2
MB-7090	5	3	5	5	5	5	5	5	5	3	3	5	5	3	3	5	5	3	3	5	3	5	5	5	3
MB-7095	1	1	2	2	2	2	1	1	2	1	1	1	1	1	1	1	1	2	1	2	1	1	1	1	1
MB-7094	2	2	2	2	2	2	2	2	2	2	2	2	2	2	2	2	2	1	2	2	2	2	2	3	3
MB-7087	5	5	5	5	5	5	5	5	5	5	5	5	5	5	5	5	5	5	5	5	5	5	5	5	5
MB-7077	1	1	1	1	1	1	1	1	1	1	1	1	1	1	1	1	1	1	1	1	1	1	1	1	1
MB-7072	2	2	2	2	2	2	2	2	2	2	2	2	2	2	2	2	2	2	2	2	2	2	2	2	2
MB-7041	1	1	1	1	1	1	1	1	1	1	1	1	1	1	1	1	1	1	1	1	1	1	1	1	1
MB-7044	4	4	4	4	4	4	4	4	4	4	4	4	4	4	4	4	1	4	4	4	4	4	1	4	4
MB-7022	1	2	2	2	2	1	1	1	2	2	1	1	1	1	1	1	2	1	1	2	1	1	1	1	1
MB-7070	1	3	3	3	1	1	1	1	2	1	1	1	2	1	1	1	1	2	1	3	1	1	2	1	1
MB-7079	4	4	4	4	4	4	4	4	4	4	4	1	4	4	4	4	1	4	4	4	4	4	4	1	4
MB-7035	3	3	3	3	3	3	3	2	3	2	4	3	5	5	5	3	3	3	3	3	4	3	2	3	3
MB-7025	5	5	5	5	5	5	5	5	5	5	5	5	5	5	5	5	3	5	5	5	5	5	5	5	5
MB-7062	1	1	1	1	1	1	1	1	1	1	1	1	1	1	1	1	1	1	1	1	1	1	1	1	1
MB-7036	5	5	5	5	5	5	5	5	5	5	5	5	5	5	5	5	5	5	5	5	5	5	5	5	5
MB-7046	2	2	2	2	2	2	2	2	2	1	2	2	2	2	2	2	2	2	2	2	2	2	2	2	2
MB-4839	1	1	1	1	1	1	1	1	2	1	1	1	1	1	1	1	1	1	4	1	1	1	1	1	1
MB-5559	INC	5	4	4	5	4	4	4	5	5	4	5	5	5	4	5	5	1	4	4	4	4	5	5	5
MB-5463	1	1	2	2	1	1	1	1	2	1	1	1	1	1	1	1	2	1	2	2	1	1	2	2	2
MB-4744	2	2	2	2	2	2	2	2	2	2	2	2	2	2	2	2	2	2	2	2	2	2	2	2	2
MB-4769	5	5	5	5	5	5	5	5	5	5	5	5	5	5	5	5	5	5	5	5	5	5	5	5	5
MB-4484	1	1	4	4	4	1	4	1	1	1	1	1	1	1	1	1	1	1	1	4	1	4	1	1	1
MB-5558	4	4	4	4	4	4	4	4	4	1	4	3	4	4	4	4	1	4	3	4	4	4	5	5	5
MB-4750	2	2	2	2	2	2	2	2	1	2	1	2	1	1	1	1	2	2	1	2	1	2	1	2	1
MB-4793	5	5	5	5	5	5	5	5	5	5	5	5	5	5	5	5	5	5	5	5	5	5	5	5	5
MB-4843	1	1	1	1	1	1	1	1	1	1	1	1	1	1	1	1	1	1	1	1	1	1	1	1	1
MB-5563	1	1	1	1	1	1	1	1	1	1	1	1	1	1	1	1	1	1	1	1	1	1	1	1	1
MB-5546	1	1	1	1	1	1	1	1	1	1	1	1	1	1	1	1	1	4	1	1	1	1	1	1	1
MB-5513	2	3	3	3	3	2	2	2	1	1	2	2	2	3	2	2	2	2	2	3	2	2	2	2	2
MB-5656	1	4	4	4	1	1	1	1	4	4	4	1	1	1	1	4	1	1	4	4	4	1	1	4	1
MB-5530	INC	4	4	4	4	1	1	4	4	1	3	1	4	1	1	1	2	1	2	4	3	1	1	4	1
MB-5553	1	1	1	1	1	2	1	1	2	2	1	1	1	1	1	1	1	2	1	1	1	1	2	1	2
MB-4836	2	2	2	2	2	2	2	2	2	2	2	2	2	3	2	2	2	2	2	2	2	2	5	2	1
MB-4828	2	2	2	2	2	2	2	2	2	2	2	2	2	2	2	2	1	2	2	2	2	2	2	2	2
MB-4679	5	5	5	5	5	5	5	5	5	5	5	5	5	5	5	5	3	5	5	5	5	5	5	5	5
MB-4033	1	1	1	1	1	1	1	1	1	1	1	1	1	1	1	1	1	1	1	1	1	1	1	1	1
MB-4692	1	1	1	1	1	1	1	1	1	1	1	1	1	1	1	1	2	1	1	1	1	1	1	2	1
MB-4675	1	1	1	1	1	1	1	1	1	1	1	1	1	1	1	1	1	1	1	1	1	1	1	1	1
MB-4653	INC	4	4	4	4	4	4	4	1	1	4	1	1	1	1	1	1	1	4	4	4	4	1	1	1
MB-4663	INC	5	3	3	5	5	5	5	3	3	3	5	5	5	5	3	3	3	3	3	3	5	5	3	5
MB-4660	5	5	5	5	5	5	5	5	5	5	5	5	5	5	5	5	5	5	5	5	5	5	5	5	5
MB-5275	1	1	1	1	1	1	1	1	1	1	1	1	2	1	1	1	2	1	1	1	1	1	2	2	2
MB-4654	2	2	2	2	2	2	1	1	2	1	1	2	2	2	1	1	2	2	2	2	1	1	1	2	1
MB-2618	2	2	2	2	2	2	2	2	2	2	2	2	2	2	2	2	2	2	2	2	2	2	2	2	2
MB-2718	5	5	5	5	5	5	5	5	5	5	5	5	5	5	5	5	5	5	5	5	5	5	5	5	5
MB-2643	5	5	4	4	5	5	5	5	4	4	3	5	5	5	5	5	3	5	5	4	3	5	3	3	5
MB-2629	2	2	2	2	2	2	2	2	2	1	2	2	2	2	2	2	2	2	3	2	2	2	2	1	1
MB-2645	2	3	3	3	2	2	2	2	2	2	3	2	2	3	2	2	2	2	2	3	3	2	2	2	2
MB-2626	1	1	1	1	2	2	1	1	2	1	1	1	1	1	1	1	1	1	1	1	1	1	1	1	1
MB-6263	1	1	1	1	1	1	1	1	1	1	2	1	1	1	1	1	1	1	2	1	1	1	1	1	1
MB-6305	5	5	5	5	5	5	5	5	5	3	5	5	5	5	5	5	3	5	5	5	5	5	5	5	5
MB-6185	1	1	1	1	1	1	1	1	1	1	1	1	1	1	1	1	1	1	1	1	1	1	1	1	1
MB-6187	4	4	4	4	4	4	4	4	4	4	4	4	4	4	4	4	4	4	4	4	4	4	4	4	4
MB-6248	5	5	5	5	5	5	5	5	5	5	5	5	5	5	5	5	5	5	5	5	5	5	5	5	5
MB-6330	3	3	3	3	3	1	3	1	3	3	3	3	3	3	3	3	5	3	4	3	3	3	3	3	3
MB-6184	2	2	2	2	2	2	2	2	2	2	2	2	2	2	2	2	2	2	2	2	2	2	2	2	2
MB-6329	2	2	2	2	2	2	2	2	2	2	2	2	2	2	2	2	2	2	2	2	2	2	2	2	2
MB-6283	1	1	1	1	1	2	1	1	1	1	1	1	1	1	1	1	1	1	1	1	1	1	1	1	1
MB-6359	1	1	2	2	1	1	1	1	1	1	1	1	1	1	1	1	2	1	1	2	1	1	1	1	1
MB-6337	3	3	3	3	3	3	3	3	3	3	3	3	3	3	3	3	3	3	3	3	3	3	3	3	3
MB-6256	1	1	1	1	1	1	1	1	1	1	1	1	1	1	1	1	1	1	1	1	1	1	1	1	1
MB-6201	1	1	1	1	1	1	1	1	2	2	2	1	1	1	1	1	2	1	1	1	1	1	1	1	1
MB-6207	1	1	1	1	1	1	1	1	1	1	1	1	1	1	1	1	1	1	1	1	1	1	1	1	1
MB-6194	1	1	1	1	4	1	1	1	1	1	4	4	1	1	1	1	3	3	4	1	4	1	1	3	3
MB-6281	2	2	2	2	2	2	2	2	1	1	2	2	2	1	2	2	2	2	2	2	2	2	2	2	1
MB-6322	1	1	1	1	1	1	1	1	1	1	1	1	2	2	1	1	1	1	2	1	1	1	1	1	1
MB-6223	3	5	5	5	3	3	3	3	3	3	3	3	3	3	3	3	3	3	3	5	3	3	3	5	3
MB-6190	1	1	1	1	1	1	1	1	1	1	1	1	1	1	1	1	1	1	1	1	1	1	1	1	1
MB-6306	2	2	2	2	2	2	2	2	2	2	2	2	2	2	2	2	2	2	2	2	2	2	2	2	2
MB-6188	5	5	5	5	5	5	5	5	5	5	5	5	5	5	5	5	5	5	5	5	5	5	5	5	5
MB-6318	3	3	3	3	3	3	3	3	3	3	3	3	3	3	3	3	3	3	3	3	3	3	3	3	3
MB-6228	INC	4	4	4	5	4	4	4	5	5	5	5	4	4	5	5	3	4	5	4	5	4	5	3	4
MB-6226	INC	2	2	2	1	1	2	1	1	1	1	2	2	1	1	2	1	2	1	2	1	2	2	2	1
MB-6225	1	1	1	1	1	1	1	1	1	1	1	1	1	1	1	1	1	1	1	1	1	1	1	1	1
MB-6280	5	5	5	5	5	5	5	5	5	5	5	5	5	5	5	5	5	5	5	5	5	5	5	5	5
MB-6253	1	1	1	1	1	1	1	1	1	1	1	1	1	1	1	1	1	1	1	1	1	1	1	1	1
MB-6098	5	5	5	5	5	5	5	5	5	5	5	5	5	5	5	5	5	5	5	5	5	5	5	5	5
MB-6017	1	1	1	1	1	1	1	1	1	1	1	1	1	1	1	1	1	1	1	1	1	1	1	1	1
MB-6019	1	4	4	4	1	4	4	1	4	1	1	1	1	4	1	1	1	1	1	4	1	4	1	1	1
MB-6163	1	1	1	1	1	1	1	1	1	1	1	1	1	1	1	1	1	1	1	1	1	1	1	1	1
MB-6157	INC	3	3	3	1	3	2	2	2	1	1	2	2	1	2	1	1	2	2	3	1	2	1	4	1
MB-6179	1	1	2	2	2	1	1	1	2	1	1	2	1	1	1	1	2	1	2	2	1	1	1	1	2
MB-6105	1	1	1	1	1	1	1	1	1	1	1	1	1	1	1	1	2	1	1	1	1	1	1	1	1
MB-6047	2	2	2	2	2	2	2	2	2	2	2	2	2	2	2	2	2	2	2	2	2	2	2	2	2
MB-6001	1	1	1	1	1	1	1	1	1	1	1	1	1	1	1	1	1	1	1	1	1	1	1	1	1
MB-6050	1	1	1	1	1	1	1	1	1	1	1	1	1	1	1	1	1	1	1	1	1	1	1	1	1
MB-6169	3	3	3	3	5	3	3	3	4	4	3	3	5	3	5	3	3	3	3	3	3	3	3	3	5
MB-4548	3	3	3	3	3	3	3	3	3	2	5	5	4	5	3	3	1	5	3	3	5	3	3	1	5
MB-4564	1	1	1	1	1	1	1	1	1	1	1	1	1	1	1	1	1	1	1	1	1	1	1	1	1
MB-4591	2	2	2	2	2	2	2	2	2	1	1	2	2	2	2	2	2	2	2	2	1	2	2	2	2
MB-4557	1	1	1	1	1	1	1	1	1	1	1	1	1	1	1	1	1	1	1	1	1	1	1	1	1
MB-4601	3	3	3	3	5	3	3	3	5	3	3	3	3	3	5	3	3	3	5	3	3	3	3	3	3
MB-4598	2	2	2	2	2	2	2	2	2	2	2	2	2	2	2	2	2	2	2	2	2	2	2	2	2
MB-4578	1	1	1	1	1	1	1	1	1	1	1	1	1	1	1	1	1	1	1	1	1	1	1	1	1
MB-4593	1	1	1	1	1	1	1	1	1	1	1	1	1	1	1	1	1	1	1	1	1	1	1	1	1
MB-5186	1	1	1	1	1	1	1	1	1	1	1	1	1	1	1	1	1	1	1	1	1	1	1	1	1
MB-4974	5	5	5	5	5	5	5	5	5	5	5	5	5	5	5	5	5	5	5	5	5	5	5	5	5
MB-4978	INC	4	4	4	4	4	4	4	1	1	1	1	1	1	4	1	1	4	1	4	1	4	1	4	1
MB-5086	1	1	1	1	1	1	1	1	1	1	1	1	1	1	1	1	1	1	1	1	1	1	1	1	1
MB-5150	1	1	1	1	1	1	1	1	1	1	1	1	1	1	1	1	1	1	1	1	1	1	1	1	1
MB-5345	1	1	1	1	1	1	1	1	1	1	1	1	1	1	1	1	1	1	1	1	1	1	1	1	1
MB-4696	5	5	5	5	5	5	5	5	5	2	5	5	5	5	5	5	3	5	5	5	5	5	5	5	5
MB-4695	1	4	4	4	4	4	1	4	4	1	1	1	4	4	1	1	1	4	1	4	1	1	1	1	1
MB-4714	5	5	5	5	5	5	5	5	5	5	5	5	5	5	5	5	5	5	5	5	5	5	5	5	5
MB-4705	1	1	4	4	1	1	1	1	1	1	4	1	1	1	1	1	1	1	4	4	4	1	1	1	1
MB-4882	1	1	1	1	1	1	1	1	1	1	1	1	1	1	1	1	1	1	2	1	1	1	1	1	1
MB-4879	3	3	3	3	3	3	3	3	3	3	3	3	3	3	3	3	3	3	3	3	3	3	3	3	3
MB-4881	5	5	5	5	5	5	5	5	5	5	5	5	5	5	5	5	5	5	5	5	5	5	5	5	5
MB-4846	2	2	2	2	2	2	2	2	2	2	2	2	2	2	2	2	2	2	2	2	2	2	2	2	2
MB-4870	1	1	1	1	1	1	1	1	4	1	1	1	1	1	1	1	1	1	1	1	2	1	1	1	1
MB-4845	1	1	1	1	1	1	1	1	1	1	2	1	1	1	1	1	1	1	1	1	1	1	1	1	1
MB-4904	3	3	3	3	3	3	3	3	3	3	3	3	3	5	3	3	3	3	3	3	3	3	3	3	3
MB-4865	5	5	5	5	5	5	5	5	5	5	5	5	5	5	5	5	5	5	5	5	5	5	5	5	5
MB-4876	2	4	4	4	2	2	2	2	1	1	1	2	2	2	2	1	1	2	2	4	4	2	2	2	1
MB-4860	1	1	1	1	1	1	1	1	1	1	1	1	1	1	1	1	1	1	1	1	1	1	1	1	1
MB-5081	1	1	1	1	1	1	1	1	1	1	4	1	1	1	1	1	1	1	1	1	1	1	1	1	1
MB-4897	4	4	4	4	4	4	4	4	4	4	4	4	4	4	4	4	4	4	4	4	4	4	4	4	1
MB-4925	1	2	1	1	1	2	1	1	1	2	2	1	1	1	1	1	1	2	1	1	1	1	1	1	1
MB-4883	1	1	1	1	1	1	1	1	1	1	1	1	1	1	1	1	1	1	1	1	1	1	1	1	1
MB-4896	3	3	3	3	5	3	3	3	4	3	5	3	3	3	5	3	3	3	2	3	3	3	3	3	3
MB-4987	1	1	1	1	1	1	1	1	1	1	1	1	1	1	1	1	1	1	1	1	1	1	1	1	1
MB-4416	5	5	5	5	5	5	5	5	5	5	5	5	5	5	5	5	3	5	5	5	5	5	5	5	5
MB-4374	1	1	1	1	1	1	1	1	1	1	1	1	1	1	1	1	1	1	4	1	2	1	1	1	1
MB-4407	5	5	5	5	5	5	5	5	5	5	5	5	5	5	5	5	5	5	5	5	5	5	5	5	5
MB-5039	2	2	2	2	2	2	2	2	2	2	2	2	2	2	2	2	2	1	1	2	2	2	1	1	2
MB-4119	1	1	2	2	1	1	1	1	1	1	1	1	1	1	1	1	2	1	2	2	1	1	1	2	1
MB-4091	1	1	1	1	1	1	1	1	2	1	1	1	1	1	1	1	1	1	1	1	1	1	1	1	1
MB-5079	1	1	1	1	1	1	1	1	1	1	1	1	1	1	1	1	1	1	1	1	1	1	1	1	1
MB-5073	1	1	1	1	1	1	1	1	1	1	1	1	1	1	1	1	1	1	1	1	1	1	1	1	1
MB-5105	1	1	1	1	1	1	1	1	1	1	1	1	1	1	1	1	1	1	1	1	1	1	1	1	1
MB-4254	5	5	5	5	5	5	5	5	5	5	5	5	5	5	5	5	5	5	5	5	5	5	5	5	5
MB-5174	INC	2	2	2	2	3	3	3	3	1	2	2	2	3	3	2	2	1	1	2	2	3	1	2	3
MB-4742	1	1	1	1	1	1	1	1	1	1	1	1	1	1	1	1	1	1	1	1	1	1	1	1	1
MB-5239	2	2	2	2	2	2	2	2	2	2	2	2	1	1	2	2	2	2	2	2	2	2	2	2	2
MB-5251	1	1	1	1	1	1	1	1	1	1	1	1	1	1	1	1	1	1	1	1	1	1	1	1	1
MB-4996	1	1	1	1	1	1	1	1	1	1	1	1	1	1	1	1	1	1	1	1	1	1	1	1	1
MB-4282	1	1	1	1	1	1	1	1	1	1	1	1	1	1	1	1	2	1	1	1	2	1	1	1	1
MB-4603	1	1	1	1	1	1	1	1	1	1	1	1	1	1	1	1	1	1	1	1	1	1	1	1	1
MB-4621	5	5	5	5	5	5	5	5	5	2	5	5	5	5	5	5	5	5	5	5	5	5	5	3	5
MB-4853	1	1	1	1	1	1	1	1	1	1	1	1	1	1	1	1	1	1	1	1	1	1	1	1	1
MB-4362	1	1	1	1	1	1	1	1	1	1	1	1	1	1	1	1	1	1	1	1	1	1	1	1	1
MB-4602	2	2	2	2	2	2	2	2	2	2	2	2	2	2	2	2	2	2	2	2	2	2	2	2	2
MB-4222	2	2	2	2	2	1	3	3	2	2	2	1	3	1	3	2	1	2	2	2	2	3	1	2	1
MB-4893	5	5	5	5	5	5	5	5	5	5	5	5	5	5	5	5	5	4	5	5	5	5	5	5	5
MB-4859	4	4	4	4	4	4	4	4	4	4	4	4	4	4	4	4	4	4	4	4	4	4	4	4	5
MB-4212	1	1	1	1	1	1	1	1	1	1	1	1	1	1	1	1	1	1	1	1	1	1	1	1	1
MB-4873	1	1	1	1	1	1	1	1	1	1	2	2	2	1	1	1	2	1	1	1	2	1	1	2	2
MB-4942	5	5	5	5	5	5	5	5	5	5	5	5	5	5	5	5	5	5	5	5	5	5	5	5	5
MB-4949	2	2	2	2	2	2	2	2	2	2	2	2	2	2	2	2	2	2	2	2	2	2	2	2	2
MB-4928	3	3	3	3	3	3	3	3	2	2	3	3	3	5	2	3	3	5	3	3	3	3	2	5	3
MB-5098	1	1	1	1	1	1	1	1	1	1	1	1	1	1	1	1	1	1	1	1	1	1	1	1	1
MB-5313	INC	3	3	3	4	1	1	1	1	1	2	2	3	1	1	1	1	2	2	3	2	1	2	2	2
MB-4145	1	2	2	2	1	1	1	1	2	1	2	1	1	1	1	1	2	1	1	2	1	1	1	1	1
MB-5122	1	1	1	1	1	1	1	1	1	1	1	1	1	1	1	1	1	1	1	1	1	1	1	1	1
MB-5278	1	4	4	4	1	1	1	1	1	1	4	1	1	1	1	1	4	1	4	4	4	1	4	4	1
MB-4213	1	1	1	1	1	1	1	1	1	1	2	1	1	1	1	1	2	2	2	1	1	1	1	1	1
MB-4126	3	3	3	3	3	3	3	3	3	1	3	1	3	1	3	1	1	1	4	3	3	3	3	1	1
MB-4957	2	2	2	2	2	1	2	2	2	1	2	1	2	2	2	1	2	1	3	2	2	2	2	3	3
MB-5470	1	2	1	1	2	1	2	1	1	1	2	2	2	2	1	2	1	1	2	1	2	2	1	1	1
MB-5317	2	2	2	2	2	2	2	2	2	1	1	2	1	2	2	2	2	2	3	2	1	2	2	2	1
MB-5308	4	4	4	4	1	4	4	4	4	1	4	4	4	1	1	4	1	1	4	4	4	4	4	1	1
MB-4976	1	1	1	1	1	1	1	1	1	1	1	1	1	1	1	1	1	1	1	1	1	1	1	1	1
MB-5277	1	4	4	4	1	1	1	1	1	1	1	1	1	4	1	1	1	1	1	4	1	1	1	1	1
MB-5110	4	4	4	4	4	4	4	4	4	4	1	1	4	4	4	4	1	4	1	4	1	4	4	1	1
MB-4046	1	1	2	2	1	1	1	1	3	3	1	1	2	3	1	1	1	1	1	2	1	1	1	2	3
MB-4012	3	3	3	3	3	1	3	3	3	1	3	3	3	3	3	3	1	3	3	3	3	3	3	3	3
MB-4141	1	1	1	1	1	1	1	1	1	1	2	1	1	1	1	1	1	1	2	1	2	1	1	4	1
MB-4001	1	1	1	1	1	1	1	1	1	1	1	1	1	1	1	1	1	1	1	1	1	1	1	1	1
MB-4792	5	5	5	5	5	5	5	5	5	5	5	5	5	5	5	5	5	5	5	5	5	5	5	5	5
MB-4738	1	4	4	4	1	1	1	1	4	4	4	1	1	1	1	4	1	1	4	4	4	1	4	1	1
MB-4264	1	1	1	1	1	1	1	1	1	2	4	1	2	1	1	4	1	1	4	1	4	1	1	1	3
MB-4794	1	1	1	1	1	1	1	1	1	1	1	1	1	1	1	1	1	1	1	1	1	1	1	1	2
MB-4782	4	4	4	4	4	4	4	4	4	1	4	4	4	4	4	4	4	4	4	4	4	4	4	4	4
MB-5008	3	3	3	3	2	3	3	3	5	2	3	3	3	2	2	3	1	3	3	3	3	3	3	3	3
MB-4426	1	1	1	1	4	1	1	1	1	3	1	1	1	4	1	1	1	1	1	1	1	1	1	1	1
MB-4390	1	1	1	1	1	1	1	1	1	1	1	1	1	1	1	1	1	1	1	1	1	1	1	1	1
MB-4434	1	1	1	1	1	1	1	1	2	1	1	1	1	1	1	1	2	1	2	1	1	1	1	1	1
MB-4368	1	1	1	1	1	1	1	1	1	1	1	1	1	1	1	1	2	1	2	1	1	1	1	2	1
MB-4442	1	1	1	1	1	1	1	1	1	1	1	1	1	1	1	1	1	1	5	1	1	1	1	1	1
MB-4418	1	1	1	1	1	1	1	1	1	1	1	1	1	1	1	1	2	1	2	1	1	1	1	1	1
MB-4381	1	1	1	1	1	1	1	1	3	1	1	1	1	1	1	1	1	1	1	1	1	1	1	1	1
MB-4395	2	2	2	2	2	3	2	2	1	2	2	2	2	2	1	2	2	2	2	2	2	2	2	2	2
MB-4630	2	2	2	2	2	2	2	2	1	1	2	2	2	2	2	2	2	2	2	2	2	2	2	3	3
MB-6010	2	2	2	2	2	2	2	2	2	2	2	2	2	2	2	2	2	2	2	2	2	2	2	2	2
MB-6021	1	1	1	1	1	1	1	1	1	1	1	1	1	1	1	1	1	1	1	1	1	1	1	1	1
MB-6059	1	1	1	1	1	1	1	1	1	1	1	1	1	1	1	1	1	1	1	1	1	1	1	1	1
MB-6154	2	2	2	2	2	2	2	2	1	2	2	2	2	2	1	2	2	2	2	2	2	2	2	2	1
MB-6097	1	1	1	1	1	1	1	1	1	1	1	1	1	1	1	1	2	1	1	1	1	1	1	3	1
MB-6107	1	1	4	4	1	1	1	1	1	1	1	1	4	1	1	1	1	1	1	4	1	1	1	1	1
MB-6023	1	1	1	1	1	1	1	1	1	1	1	1	2	1	1	1	1	1	1	1	1	1	1	1	1
MB-6152	3	3	3	3	5	3	3	3	3	3	3	3	3	3	3	3	3	3	3	3	3	3	3	3	3
MB-6018	1	1	1	1	1	1	1	1	1	1	1	1	1	1	1	1	1	1	1	1	1	1	1	1	1
MB-6082	1	4	4	4	4	4	1	1	1	1	1	1	1	1	1	1	1	1	1	4	1	1	1	1	1
MB-6029	1	1	1	1	1	1	1	1	1	1	1	1	1	1	1	1	1	1	1	1	1	1	1	1	1
MB-5295	5	5	5	5	5	5	5	5	5	5	5	5	5	5	5	5	5	5	5	5	5	5	5	5	5
MB-5386	2	2	2	2	2	2	2	2	1	2	1	1	1	2	2	1	2	2	1	2	1	2	1	1	2
MB-5092	1	4	1	1	1	1	1	1	1	1	1	1	1	1	1	1	1	1	1	1	1	1	1	1	1
MB-6068	5	5	5	5	5	5	4	5	5	5	5	5	5	5	5	5	5	5	4	5	5	4	5	5	5
MB-6039	2	2	2	2	2	2	2	2	1	1	2	2	2	2	2	2	2	2	2	2	2	2	2	2	2
MB-6022	2	2	2	2	2	2	2	2	2	2	1	1	1	2	2	2	2	1	2	2	1	2	1	1	1
MB-6125	1	1	1	1	1	1	1	1	1	1	1	1	1	1	1	1	1	1	1	1	1	1	1	1	1
MB-6053	2	2	2	2	1	1	2	2	2	1	2	1	2	1	2	1	2	1	2	2	2	2	1	1	2
MB-6135	2	2	2	2	2	2	2	2	2	2	2	2	2	2	2	2	2	2	2	2	2	2	2	2	2
MB-6042	1	1	1	1	1	1	1	1	1	1	1	1	1	1	1	1	1	1	1	1	1	1	1	1	1
MB-6058	5	5	5	5	5	5	5	5	5	5	5	5	5	5	5	5	5	5	5	5	5	5	5	5	5
MB-6052	4	4	4	4	4	4	4	4	5	3	4	4	4	4	4	4	1	5	4	4	4	4	4	4	5
MB-5368	1	1	1	1	4	1	1	1	1	1	1	1	1	1	1	1	1	1	1	1	1	1	1	1	1
MB-4189	INC	1	2	2	3	3	3	1	2	1	2	1	2	5	3	2	1	2	2	2	2	3	1	2	1
MB-5335	5	5	5	5	5	5	5	5	5	5	5	5	5	5	5	5	5	5	5	5	5	5	5	5	5
MB-4008	2	2	2	2	2	2	2	2	2	2	2	2	2	2	2	1	2	2	2	2	2	2	2	1	2
MB-5134	1	1	1	1	1	1	1	1	1	1	1	1	1	1	1	1	1	1	1	1	1	1	1	1	1
MB-4139	2	2	2	2	2	2	2	2	2	2	2	2	2	2	2	2	2	2	2	2	2	2	2	2	2
MB-5130	1	1	1	1	1	1	1	1	1	1	1	1	1	1	1	1	1	1	1	1	1	1	1	1	1
MB-5135	5	5	5	5	5	5	5	5	5	5	5	5	5	5	5	5	5	5	5	5	5	5	5	5	5
MB-4880	5	5	5	5	5	5	5	5	5	5	5	5	5	5	5	5	5	5	5	5	5	5	5	5	5
MB-5054	3	3	3	3	3	4	4	3	5	5	3	3	3	4	3	3	3	3	1	3	3	4	3	3	5
MB-5057	5	5	5	5	5	5	5	5	5	5	5	5	5	5	5	5	5	5	5	5	5	5	5	5	5
MB-4098	1	1	1	1	1	1	1	1	1	1	1	1	1	1	3	1	1	1	1	1	1	1	1	1	1
MB-4760	1	1	1	1	1	1	1	1	1	1	1	1	1	1	1	1	1	1	1	1	1	1	1	1	1
MB-5102	5	5	5	5	3	5	5	3	5	5	5	5	3	3	3	5	5	5	5	5	5	5	5	5	5
MB-5420	4	4	4	4	4	4	4	4	4	4	1	1	4	4	4	4	1	4	1	4	1	4	4	4	1
MB-5458	3	3	3	3	3	3	3	3	3	3	3	3	3	3	3	3	3	3	4	3	3	3	3	3	3
MB-5492	1	1	1	1	1	1	1	1	1	1	1	1	1	1	1	1	1	1	1	1	1	1	1	1	1
MB-5407	1	1	1	1	1	1	1	1	1	1	1	1	1	1	1	1	1	1	1	1	1	1	1	1	1
MB-5394	3	3	3	3	3	3	3	3	3	3	3	3	3	3	3	3	3	3	3	3	3	3	3	3	3
MB-5410	1	1	1	1	1	1	1	1	1	1	1	1	1	1	1	1	1	1	1	1	1	1	1	1	1
MB-5435	2	2	2	2	2	2	2	2	2	2	2	2	2	2	2	2	2	2	2	2	2	2	2	2	2
MB-5406	2	2	2	2	2	2	2	2	1	2	2	2	2	2	2	2	2	2	2	2	2	2	2	2	2
MB-4329	1	1	1	1	1	1	1	1	1	1	1	1	1	1	1	1	1	1	1	1	1	1	1	1	1
MB-4005	INC	1	1	1	1	1	2	2	1	2	2	2	2	1	2	1	1	2	4	1	2	2	2	1	1
MB-6288	1	2	2	2	1	1	1	2	1	1	1	1	2	1	1	1	2	2	1	2	1	1	2	2	2
MB-6272	5	5	5	5	5	5	5	5	5	5	5	5	5	5	5	5	5	5	5	5	5	5	5	5	5
MB-6218	1	1	1	1	1	1	1	1	1	1	1	1	1	1	1	1	1	1	1	1	1	1	1	1	1
MB-6246	3	3	3	3	3	3	2	3	2	2	3	3	3	2	2	3	3	5	3	3	3	2	3	5	3
MB-6217	2	2	2	2	2	2	2	2	1	1	2	2	2	2	2	2	2	2	2	2	2	2	2	2	2
MB-6206	1	1	1	1	1	1	1	1	1	1	1	1	1	1	1	1	1	1	1	1	1	1	1	1	1
MB-6308	1	1	1	1	1	1	1	1	1	1	1	1	1	1	1	1	1	1	1	1	1	1	1	1	1
MB-6271	1	1	1	1	1	1	1	1	1	1	1	1	1	1	1	1	1	1	1	1	1	1	1	1	1
MB-6245	5	5	5	5	5	5	5	5	5	5	5	5	5	5	5	5	5	5	5	5	5	5	5	5	5
MB-6233	1	1	1	1	1	1	1	1	2	2	1	2	2	2	1	1	1	2	2	1	1	1	1	2	2
MB-4343	3	3	3	3	3	3	3	3	3	3	4	1	1	3	3	1	2	1	1	3	1	3	1	1	1
MB-4281	2	2	2	2	2	2	2	2	2	2	2	2	2	2	2	2	2	2	2	2	2	2	2	3	3
MB-4283	1	1	1	1	1	1	1	1	1	1	1	1	1	1	1	1	1	1	1	1	1	1	1	1	1
MB-4341	3	3	3	3	3	3	3	3	3	3	3	3	3	3	3	3	3	3	3	3	3	3	3	3	3
MB-4303	3	3	3	3	3	3	3	3	3	3	5	5	5	3	3	3	3	5	5	3	5	3	3	3	5
MB-4274	1	1	1	1	1	1	1	1	2	1	1	1	1	1	1	1	2	2	2	1	1	1	1	1	1
MB-4292	1	1	1	1	1	1	1	1	1	1	1	1	1	1	1	1	2	1	1	1	1	1	1	1	1
MB-4278	INC	1	2	2	1	1	1	1	2	1	1	2	2	1	1	2	2	1	2	2	1	1	2	2	3
MB-5399	1	1	1	1	1	1	1	1	1	1	1	1	1	1	1	1	1	1	1	1	1	1	1	1	1
MB-5364	1	4	4	4	1	1	1	1	1	1	1	1	1	1	1	1	1	1	1	4	1	1	1	1	1
MB-3526	1	4	4	4	4	1	1	1	1	1	4	1	4	1	1	1	1	1	1	4	4	1	1	1	4
MB-6138	1	1	1	1	1	1	1	1	1	1	1	1	1	1	1	1	1	1	1	1	1	1	1	1	1
MB-6049	2	2	2	2	3	2	2	2	2	2	2	2	2	2	2	2	2	2	2	2	2	2	2	2	2
MB-6055	5	5	5	5	5	5	5	5	5	5	5	5	5	5	5	5	5	5	5	5	5	5	5	5	5
MB-6108	1	1	4	4	1	1	1	1	1	1	1	1	1	1	1	1	1	1	1	4	1	1	1	1	1
MB-6044	1	3	3	3	1	3	1	1	2	1	2	1	3	1	1	1	1	1	1	3	2	1	1	4	1
MB-6181	1	1	1	1	1	1	1	1	1	1	1	1	1	1	1	1	1	1	1	1	1	1	1	1	1
MB-6100	3	3	3	3	3	3	3	3	3	3	3	3	3	3	3	3	1	3	3	3	3	3	3	3	3
MB-6085	3	3	3	3	3	3	3	3	3	3	3	3	3	3	3	3	3	3	3	3	3	3	3	3	3
MB-6113	1	3	4	4	4	1	1	1	4	1	1	1	1	1	1	1	1	1	1	4	1	1	1	1	1
MB-6079	1	1	1	1	1	2	1	1	1	1	1	1	2	1	1	1	1	2	1	1	1	1	1	2	2
MB-6103	1	1	1	1	4	1	1	1	1	1	1	1	1	1	1	1	1	4	1	1	1	1	1	1	1
MB-6016	1	1	1	1	1	1	1	1	1	1	1	1	1	1	1	1	1	1	1	1	1	1	1	1	1
MB-6149	1	1	1	1	1	1	1	1	1	1	1	1	1	1	1	1	1	1	2	1	1	1	1	1	1
MB-6131	3	3	3	3	3	3	3	3	3	3	3	3	3	3	3	3	3	3	3	3	3	3	3	3	3
MB-6007	1	1	2	2	1	1	1	1	1	1	1	1	1	1	1	1	2	1	1	2	1	1	1	1	2
MB-6147	4	4	4	4	4	4	4	4	4	1	4	4	1	4	4	1	1	4	1	4	4	4	1	4	4
MB-6114	INC	3	3	3	1	1	3	3	4	2	2	1	2	3	4	1	1	1	2	3	2	3	1	4	1
MB-6167	1	1	1	1	1	1	1	1	1	1	1	1	1	1	1	1	1	1	1	1	1	1	1	1	1
MB-6146	2	3	2	2	3	2	2	2	2	1	2	2	2	3	2	2	2	2	2	2	2	2	2	1	2
MB-6092	1	1	1	1	1	1	1	1	4	1	1	1	1	1	1	1	1	1	1	1	1	1	1	1	1
MB-6160	3	3	3	3	3	3	3	3	3	3	3	3	3	3	3	3	5	3	3	3	3	3	3	3	3
MB-6075	2	2	2	2	2	2	2	2	2	2	2	2	2	1	2	2	2	1	2	2	2	2	2	1	1
MB-6011	2	2	2	2	2	2	2	2	2	2	2	2	2	2	2	2	2	2	2	2	2	2	2	2	2
MB-6071	1	1	1	1	1	1	1	1	1	1	1	1	1	1	1	1	1	1	1	1	1	1	1	1	1
MB-6214	1	1	1	1	1	1	1	1	1	1	1	1	1	1	1	1	1	1	1	1	1	1	1	1	1
MB-6334	2	2	2	2	2	2	2	2	2	2	2	2	2	2	2	2	2	2	2	2	2	2	2	2	2
MB-6346	1	2	2	2	1	1	1	1	2	1	1	1	1	1	1	1	2	1	1	2	1	1	1	2	1
MB-6319	1	1	1	1	1	1	1	1	1	1	1	1	1	1	1	1	1	1	1	1	1	1	1	1	1
MB-6200	1	2	1	1	1	2	1	1	2	1	2	1	2	1	1	1	2	1	1	1	2	1	1	1	1
MB-6336	5	5	5	5	5	5	5	5	5	5	5	5	5	5	5	5	5	5	5	5	5	5	5	5	5
MB-6211	1	1	1	1	1	1	1	1	1	1	1	1	1	1	1	1	1	1	1	1	1	1	1	1	1
MB-6232	1	1	1	1	1	1	1	1	1	1	1	1	1	1	1	1	1	1	1	1	1	1	1	1	1
MB-6234	1	4	4	4	1	1	1	1	1	1	4	1	1	1	1	4	1	1	4	4	4	1	4	4	1
MB-6300	1	1	1	1	1	1	1	1	2	1	1	1	1	1	1	1	2	1	1	1	2	1	1	1	1
MB-5533	1	4	4	4	1	1	1	1	1	1	1	1	1	1	1	1	1	1	1	4	1	1	1	1	1
MB-5543	1	1	1	1	1	1	1	1	1	1	1	1	1	1	1	1	2	1	1	1	1	1	1	1	1
MB-4236	1	1	1	1	1	1	1	1	3	1	3	1	1	1	1	1	2	1	2	1	3	1	1	1	1
MB-4234	1	1	1	1	1	1	1	1	1	1	1	1	1	1	1	1	1	1	1	1	1	1	1	1	1
MB-4270	2	2	2	2	2	2	2	2	2	2	2	2	2	2	2	2	2	2	2	2	2	2	2	2	2
MB-4235	INC	5	4	4	5	5	5	5	5	1	4	1	2	5	5	4	1	1	4	4	4	5	5	4	1
MB-4250	1	1	1	1	1	1	1	1	1	1	1	1	1	1	1	1	1	1	1	1	1	1	1	1	1
MB-5467	4	4	4	4	4	4	4	4	1	1	4	4	1	1	4	1	1	1	4	4	4	4	1	1	1
MB-4323	1	1	1	1	1	1	1	1	1	1	1	1	1	1	1	1	2	1	1	1	1	1	1	1	1
MB-4318	2	2	2	2	2	2	2	2	2	1	2	2	2	2	2	2	2	2	2	2	2	2	2	2	2
MB-4333	1	1	1	1	1	1	1	1	1	1	1	1	1	1	1	1	1	1	1	1	1	1	1	1	1
MB-4339	1	1	2	2	1	1	1	1	1	1	1	1	1	1	1	1	2	1	1	2	1	1	1	3	3
MB-4322	1	1	1	1	1	1	1	1	1	1	1	1	1	1	1	1	1	1	1	1	1	1	1	1	1
MB-4351	3	3	3	3	3	3	3	3	3	1	3	3	3	3	3	3	1	5	3	3	3	3	3	3	3
MB-5063	3	3	3	3	4	3	3	3	3	3	3	3	3	3	3	3	3	3	3	3	3	3	3	4	3
MB-4360	5	3	5	5	5	5	3	5	5	3	4	5	3	3	5	5	3	5	5	5	4	3	3	3	5
MB-4375	1	1	1	1	4	1	1	1	1	1	4	1	4	1	1	1	1	1	1	1	1	1	1	1	4
MB-4798	1	1	1	1	1	1	1	1	1	1	1	1	1	1	1	1	1	1	1	1	1	1	1	1	1
MB-4746	1	1	1	1	1	2	1	1	1	1	1	1	2	1	1	1	1	1	1	1	1	1	1	1	1
MB-4838	2	2	2	2	2	2	2	2	2	2	2	2	2	2	2	2	2	2	2	2	2	2	2	2	2
MB-4829	1	2	1	1	1	1	1	1	1	1	1	1	1	1	1	2	1	1	1	1	1	1	2	1	1
MB-4802	2	2	2	2	2	2	2	2	2	2	2	2	2	2	2	2	2	2	2	2	2	2	2	2	2
MB-5426	5	3	5	5	5	5	5	5	5	5	5	3	5	4	5	3	5	4	3	5	5	5	5	5	5
MB-5444	1	1	1	1	1	1	1	1	1	1	1	1	1	1	1	1	1	1	1	1	1	1	1	1	1
MB-5431	4	5	4	4	5	4	4	4	5	5	4	4	4	4	5	4	1	1	4	4	4	4	5	4	1
MB-5447	2	2	2	2	2	2	2	2	2	2	2	2	2	2	2	2	2	2	2	2	2	2	2	2	2
MB-5434	2	2	2	2	2	2	2	2	1	1	1	2	2	1	2	2	2	2	2	2	1	2	2	1	1
MB-5255	4	4	4	4	4	4	4	4	4	4	4	4	4	4	4	4	4	4	4	4	4	4	4	5	5
MB-5231	3	3	3	3	3	3	3	3	5	3	3	3	3	3	3	3	3	3	3	3	3	3	3	3	3
MB-5208	5	5	5	5	5	5	5	5	5	5	5	5	5	5	5	5	5	5	5	5	5	5	5	5	5
MB-5428	1	1	1	1	1	1	1	1	1	1	1	1	1	1	1	1	1	1	1	1	1	1	1	1	1
MB-5440	5	5	5	5	5	5	5	5	5	5	5	5	5	5	2	5	5	5	5	5	5	5	5	5	5
MB-5425	1	1	1	1	1	1	1	1	1	1	1	1	1	1	1	1	2	1	1	1	1	1	1	2	2
MB-5298	5	5	5	5	5	5	5	5	5	5	5	5	5	5	5	5	5	5	5	5	5	5	5	5	5
MB-5334	1	1	1	1	1	1	1	1	1	1	2	1	1	1	1	1	2	1	1	1	1	1	1	1	1
MB-5326	1	1	4	4	1	1	1	1	1	1	1	1	1	1	1	1	1	1	1	4	1	1	1	1	1
MB-4059	1	1	1	1	1	1	1	1	1	1	1	1	1	1	1	1	1	1	1	1	1	1	1	1	1
MB-6230	1	1	1	1	1	1	1	1	1	1	1	1	1	1	1	1	1	1	1	1	1	1	1	1	1
MB-6150	2	2	2	2	2	2	2	2	2	2	2	2	2	1	2	2	1	2	2	2	2	2	2	2	1
MB-6014	4	4	4	4	1	4	4	4	1	1	4	1	1	4	1	1	4	1	4	4	4	4	4	4	1
MB-6145	2	2	2	2	2	2	2	2	2	2	2	2	2	2	2	2	2	2	2	2	2	2	2	2	2
MB-6012	1	1	1	1	1	1	1	1	1	1	1	1	1	1	1	1	1	1	1	1	1	1	1	1	1
MB-6024	1	1	1	1	1	1	1	1	1	1	1	1	1	1	1	1	1	1	1	1	1	1	1	1	1
MB-6124	1	2	2	2	2	1	1	2	1	1	1	1	2	2	2	2	2	1	1	2	1	1	1	1	1
MB-6171	1	1	1	1	1	1	1	1	1	1	1	1	1	1	1	1	1	1	1	1	1	1	1	1	1
MB-6060	2	2	2	2	2	2	2	2	2	2	2	2	2	2	2	2	2	2	2	2	2	2	2	2	2
MB-6008	2	2	2	2	2	2	2	2	2	2	2	2	2	2	2	2	2	2	2	2	2	2	2	2	2
MB-6036	5	5	5	5	5	5	5	5	5	5	5	5	5	5	5	5	5	5	5	5	5	5	5	5	5
MB-6144	5	5	5	5	5	5	5	5	5	5	5	5	5	5	5	5	3	5	5	5	5	5	5	5	5
MB-5346	5	5	5	5	5	5	5	5	5	5	5	5	5	5	5	5	3	5	5	5	5	5	5	5	5
MB-5373	1	1	1	1	1	1	1	1	1	1	1	1	1	1	2	1	2	1	1	1	2	1	1	2	1
MB-6178	5	5	5	5	5	5	5	5	5	5	5	5	5	5	5	5	5	5	5	5	5	5	5	5	5
MB-6063	INC	3	3	3	5	4	4	4	5	3	3	4	1	3	5	1	4	5	4	3	3	4	1	5	3
MB-6020	2	2	2	2	2	2	2	2	1	2	1	1	2	1	2	2	2	2	1	2	1	2	2	2	1
MB-6062	5	5	5	5	3	5	5	5	5	2	5	5	5	5	2	5	5	5	3	5	5	5	5	5	5
MB-6069	1	1	1	1	1	1	1	1	1	1	1	1	1	1	1	1	1	1	1	1	1	1	1	1	1
MB-6141	1	1	1	1	1	1	1	1	1	1	2	2	2	2	1	2	1	2	2	1	2	1	1	2	2
MB-6118	1	1	1	1	1	1	1	1	1	1	1	1	1	1	1	1	1	1	1	1	1	1	1	1	1
MB-6065	1	1	1	1	1	1	1	1	1	1	1	1	1	1	1	1	1	1	1	1	1	1	1	1	1
MB-6006	1	1	1	1	1	1	1	1	2	2	1	1	1	1	1	1	1	2	1	1	1	1	1	1	1
MB-6048	2	2	2	2	2	2	2	2	2	2	1	2	1	2	2	2	2	1	2	2	1	2	2	1	2
MB-6116	2	2	2	2	2	2	2	2	3	2	2	2	2	2	2	2	2	2	2	2	2	2	2	2	2
MB-4310	1	1	1	1	1	1	1	1	2	1	1	1	1	1	1	1	1	1	2	1	1	1	1	1	1
MB-4300	3	3	3	3	3	3	3	3	1	3	3	1	3	3	3	1	1	1	1	3	3	3	1	1	1
MB-4298	1	1	2	2	1	1	1	1	2	2	1	1	1	2	2	1	2	1	2	2	1	1	1	2	2
MB-4417	5	5	5	5	5	5	5	5	5	5	5	5	5	5	5	5	3	5	5	5	5	5	5	5	5
MB-4079	INC	2	2	2	1	3	3	1	3	3	2	1	3	2	3	2	2	2	4	2	2	3	1	3	3
MB-4317	INC	3	2	2	1	1	3	3	2	1	1	1	3	4	1	3	2	1	2	2	4	3	3	4	3
MB-4350	3	3	3	3	5	4	3	3	3	3	5	5	3	3	5	5	1	5	3	3	5	3	3	5	5
MB-4332	5	5	5	5	5	5	5	5	5	5	5	5	5	5	5	5	3	5	5	5	5	5	5	5	5
MB-4324	2	2	2	2	2	1	2	2	1	1	3	2	2	2	2	2	2	1	2	2	3	2	2	3	3
MB-4306	1	1	1	1	1	1	1	1	1	1	1	1	1	1	1	1	1	1	1	1	1	1	1	1	1
MB-7226	2	2	2	2	2	2	2	2	2	2	2	2	2	2	2	2	2	2	2	2	2	2	2	1	2
MB-7205	5	5	5	5	5	5	5	5	5	5	5	5	5	5	5	5	5	5	5	5	5	5	5	5	5
MB-7160	1	2	2	2	1	1	1	1	2	1	1	2	1	2	1	1	2	1	1	2	1	1	2	2	2
MB-7159	5	5	5	5	5	5	5	5	5	5	5	5	5	5	5	5	5	5	5	5	5	5	5	5	5
MB-7167	1	2	2	2	1	1	1	1	1	1	2	2	2	2	1	1	1	1	5	2	2	1	2	1	1
MB-7207	3	3	3	3	3	3	3	3	3	3	3	3	3	3	3	3	3	3	3	3	3	3	3	3	3
MB-7241	1	1	1	1	1	1	1	1	1	1	2	1	1	1	1	1	1	1	2	1	1	1	2	2	2
MB-7236	1	1	2	2	1	1	1	1	1	1	1	1	1	1	1	1	1	1	1	1	1	1	1	1	1
MB-7168	1	1	4	4	1	1	1	1	1	1	1	1	1	1	1	1	1	1	1	4	1	1	1	4	1
MB-7162	1	1	1	1	1	1	1	1	1	1	1	1	1	1	1	1	1	1	1	1	1	1	1	1	1
MB-7235	1	1	1	1	1	1	1	1	1	1	1	1	1	1	1	1	1	1	1	1	1	1	1	1	1
MB-4331	2	2	2	2	2	2	2	2	2	2	2	2	2	2	2	2	2	2	2	2	2	2	2	2	2
MB-4353	2	2	2	2	2	2	2	1	1	2	2	2	2	2	1	2	2	1	2	2	2	2	1	2	2
MB-4354	3	3	3	3	3	3	3	3	3	3	1	3	3	3	3	3	3	5	3	3	1	3	3	3	3
MB-4328	2	1	2	2	2	2	2	1	2	2	2	1	1	1	2	1	2	2	2	2	1	2	1	1	1
MB-4348	2	3	2	2	3	3	2	2	2	2	2	2	2	2	2	2	2	2	2	2	2	2	2	2	2
MB-6030	1	1	1	1	1	1	1	1	1	1	1	1	1	1	1	1	1	1	1	1	1	1	1	1	1
MB-6133	1	1	1	1	1	1	1	1	1	1	1	1	1	1	1	1	1	1	1	1	1	1	1	1	1
MB-6083	1	1	1	1	1	1	1	1	1	1	1	1	1	1	1	1	1	1	1	1	1	1	1	1	1
MB-6026	2	2	2	2	2	2	2	2	2	2	2	2	2	2	2	2	2	2	2	2	2	2	2	2	2
MB-6168	1	1	1	1	1	1	1	1	1	1	1	1	1	1	1	1	1	1	1	1	1	1	1	1	1
MB-6101	1	1	4	4	1	1	1	1	1	1	1	1	1	1	5	1	1	1	4	4	1	1	1	1	1
MB-6156	2	2	2	2	2	2	2	2	2	2	2	2	2	2	2	2	2	2	3	2	2	2	2	2	2
MB-6051	1	1	1	1	1	1	1	1	1	1	1	1	1	1	1	1	1	1	1	1	1	1	1	1	1
MB-6182	3	3	3	3	3	3	3	3	3	3	3	3	3	3	3	3	3	3	3	3	3	3	3	3	3
MB-6080	2	2	2	2	2	2	2	2	2	2	3	2	2	2	2	2	2	2	2	2	3	2	2	2	2
MB-6143	5	5	5	5	5	5	5	5	5	5	5	5	5	5	5	5	1	5	5	5	5	5	5	3	5
MB-6164	2	2	2	2	2	2	2	2	1	1	2	2	2	2	2	2	2	2	2	2	2	2	2	2	2
MB-0551	4	4	4	4	4	4	4	4	4	1	4	4	4	4	4	4	4	4	4	4	4	4	4	4	4
MB-0391	3	3	3	3	3	3	3	3	3	3	3	3	3	3	4	3	1	3	4	3	3	3	3	3	3
MB-0367	1	4	4	4	1	1	1	1	4	1	1	1	1	1	1	1	1	1	4	4	1	1	1	1	1
MB-5171	4	4	4	4	4	4	4	4	4	4	4	4	4	4	4	4	4	4	4	4	4	4	4	4	1
MB-5199	INC	3	4	4	3	4	4	4	3	3	5	5	1	3	4	1	3	3	1	4	3	4	4	4	5
MB-5177	2	2	2	2	2	2	2	2	1	2	2	2	2	2	2	2	2	2	2	2	2	2	2	4	2
MB-5178	1	1	1	1	1	1	1	1	1	1	1	1	1	1	1	1	1	1	1	1	1	1	1	1	1
MB-5280	1	1	1	1	1	1	1	1	1	1	1	1	1	1	1	1	1	1	1	1	1	1	1	1	1
MB-5148	4	4	4	4	4	4	4	4	4	4	1	1	4	1	4	4	4	3	4	4	1	4	4	4	3
MB-4342	1	1	1	1	1	1	1	1	1	1	1	1	1	1	1	1	1	1	1	1	1	1	1	1	1
MB-5225	5	5	5	5	5	5	5	5	5	5	5	5	5	5	5	5	5	5	5	5	5	5	5	5	5
MB-4024	5	5	5	5	5	5	4	5	5	5	5	5	5	5	5	5	5	5	5	5	5	4	5	5	5
MB-6314	2	2	2	2	2	2	2	2	2	2	2	2	2	2	2	2	2	2	2	2	2	2	2	2	2
MB-6257	2	2	2	2	2	2	2	2	2	1	2	2	2	2	2	2	2	2	1	2	2	2	2	1	2
MB-6358	3	3	3	3	2	3	2	3	3	2	1	3	3	3	5	3	5	3	3	3	1	2	2	5	3
MB-6242	5	5	5	5	5	5	5	5	5	5	5	5	5	5	5	5	3	5	5	5	5	5	5	5	5
MB-6237	5	5	5	5	5	5	5	5	5	5	5	5	5	5	5	5	5	5	5	5	5	5	5	5	5
MB-6183	2	2	2	2	1	1	2	1	1	2	1	2	2	2	1	2	2	1	2	2	1	2	2	1	2
MB-6254	1	1	1	1	1	1	1	1	1	1	1	1	1	1	1	1	1	1	2	1	1	1	1	1	1
MB-6231	1	1	1	1	1	1	1	1	1	1	1	1	1	1	1	1	1	1	1	1	1	1	1	1	1
MB-6204	1	1	1	1	1	1	1	1	1	1	1	1	1	1	1	1	1	1	1	1	1	1	1	4	1
MB-6229	1	1	1	1	1	1	1	1	1	1	1	1	1	1	1	1	1	1	1	1	1	1	1	1	1
MB-5154	4	4	4	4	4	4	4	4	4	1	4	4	4	4	4	4	5	4	4	4	4	4	4	3	4
MB-5175	1	1	1	1	1	1	1	1	4	1	4	1	1	4	1	1	1	1	4	1	4	1	1	1	1
MB-5173	5	5	5	5	5	5	5	5	5	5	5	5	5	5	5	5	5	5	5	5	5	5	5	5	5
MB-5162	4	4	4	4	5	4	4	5	5	4	4	5	4	5	5	4	3	5	4	4	4	4	4	4	5
MB-5164	4	4	4	4	4	4	4	4	1	1	4	1	4	4	1	1	1	1	1	4	4	4	1	4	1
MB-7253	2	2	2	2	2	2	2	2	2	2	2	2	2	2	2	2	2	2	2	2	2	2	2	2	2
MB-7298	2	2	2	2	2	2	2	2	2	2	2	2	2	2	2	2	2	2	2	2	2	2	2	2	2
MB-7299	2	2	2	2	2	2	2	2	2	2	2	2	2	2	2	2	2	2	2	2	2	2	2	2	1
MB-7293	1	1	1	1	1	1	1	1	1	1	1	1	1	1	1	1	1	1	1	1	1	1	1	1	1
MB-3978	3	3	3	3	2	3	2	3	3	2	3	3	3	2	2	3	5	3	2	3	3	2	3	3	3
MB-7288	2	2	2	2	2	2	2	2	2	2	2	2	2	2	2	2	2	2	2	2	2	2	2	1	2
MB-2923	3	3	3	3	3	3	3	3	3	2	3	3	3	3	3	3	3	3	3	3	3	3	3	3	3
MB-0402	4	4	4	4	1	4	4	4	4	4	4	4	4	4	1	4	4	4	4	4	4	4	4	4	4
MB-0381	2	2	3	3	2	2	2	2	2	2	2	2	2	2	2	2	2	2	1	3	2	2	1	2	2
MB-0592	1	1	1	1	2	2	2	1	2	2	1	1	1	2	1	2	1	2	2	1	1	2	1	1	1
MB-5271	2	2	2	2	2	2	2	2	2	2	2	2	2	2	2	2	2	2	2	2	2	2	2	2	2
MB-5235	5	5	5	5	4	5	5	5	5	5	5	5	5	5	5	5	5	4	5	5	5	5	5	5	5
MB-4931	5	5	5	5	5	5	5	5	5	5	5	5	5	5	5	5	5	5	5	5	5	5	5	5	5
MB-5332	2	2	2	2	2	2	2	2	2	1	2	2	2	2	2	2	2	1	2	2	2	2	2	2	2
MB-7045	3	3	3	3	2	3	3	3	3	3	1	3	3	3	3	1	3	3	4	3	1	3	3	5	3
MB-7049	5	5	5	5	5	5	5	5	5	5	5	5	5	5	5	5	3	5	5	5	5	5	5	3	5
MB-7031	5	5	5	5	5	5	5	5	5	5	5	5	5	5	5	5	5	5	5	5	5	5	5	5	5
MB-7061	1	1	1	1	1	1	1	1	1	1	1	1	1	1	1	1	1	1	1	1	1	1	1	1	1
MB-7050	1	3	3	3	1	1	1	1	3	1	1	1	1	1	1	1	2	2	1	3	1	1	1	2	1
MB-7078	5	5	5	5	5	5	5	5	5	2	5	5	5	5	5	5	3	5	5	5	5	5	5	5	5
MB-7054	5	5	5	5	5	5	5	5	5	2	4	5	5	5	5	5	3	5	5	5	4	5	5	5	5
MB-7048	1	1	1	1	1	1	1	1	1	1	1	1	1	1	1	1	1	1	1	1	1	1	1	1	1
MB-7058	1	1	1	1	1	1	1	1	1	1	1	1	1	1	1	1	1	1	1	1	1	1	1	1	1
MB-7056	1	1	1	1	1	1	1	1	1	1	1	1	1	1	1	1	1	1	1	1	1	1	1	1	1
MB-7038	5	5	5	5	5	5	5	5	5	5	5	5	5	5	5	5	5	5	5	5	5	5	5	5	5
MB-7086	2	2	2	2	2	2	2	2	2	2	1	2	1	2	2	1	1	2	2	2	1	2	2	1	2
MB-0177	1	1	1	1	1	1	1	1	1	1	1	1	1	1	1	1	1	1	1	1	1	1	1	1	1
MB-0435	5	4	4	4	5	5	5	5	4	4	5	5	5	4	5	5	3	4	5	4	5	5	1	4	5
MB-0159	INC	4	4	4	5	4	4	3	5	5	5	4	4	4	5	4	5	3	4	4	3	4	5	3	5
MB-0399	3	3	3	3	3	3	3	3	3	3	3	3	3	3	3	3	3	3	3	3	3	3	3	3	3
MB-0388	1	4	4	4	1	1	1	1	1	1	4	1	4	4	1	1	1	1	1	4	4	1	1	4	4
MB-0351	1	1	1	1	1	1	1	1	1	1	1	1	1	1	1	1	1	1	1	1	2	1	1	1	1
MB-0615	4	4	4	4	4	4	4	4	1	5	5	3	4	4	4	4	5	4	4	4	3	4	4	3	4
MB-0265	4	4	4	4	4	4	4	4	4	4	5	4	4	4	4	4	1	4	4	4	5	4	4	4	4
MB-0116	1	1	1	1	1	1	1	1	1	1	1	1	1	1	1	1	1	1	1	1	1	1	1	1	1
MB-0472	2	2	2	2	2	1	2	2	1	1	2	2	2	2	2	2	2	2	2	2	2	2	2	2	2
MB-0330	4	4	4	4	5	5	4	2	4	4	4	1	2	4	4	1	1	1	4	4	4	4	1	1	1
MB-0191	5	5	5	5	5	5	5	5	5	5	3	5	5	5	5	5	5	5	5	5	3	5	5	5	5
MB-0231	1	1	1	1	1	1	1	1	1	1	1	1	1	1	1	1	1	1	1	1	1	1	1	1	1
MB-0558	5	5	5	5	5	5	5	5	5	5	5	5	5	5	5	5	5	5	5	5	5	5	5	5	5
MB-0393	4	4	4	4	4	4	4	4	4	4	1	1	1	4	4	1	1	1	4	4	1	4	2	4	1
MB-0553	1	1	1	1	1	1	1	1	1	1	1	1	1	1	1	1	2	1	1	1	1	1	1	1	1
MB-0587	1	1	2	2	1	1	1	1	1	1	1	1	1	1	1	1	2	1	1	2	1	1	1	2	2
MB-0611	1	2	1	1	1	1	1	1	1	1	1	1	1	1	1	1	2	1	1	1	1	1	1	1	1
MB-0640	1	1	1	1	1	1	1	1	1	1	1	1	1	1	1	1	1	1	1	1	1	1	1	1	1
MB-0114	1	1	1	1	1	1	1	1	1	1	1	1	1	1	1	1	1	1	1	1	1	1	1	1	1
MB-0222	1	4	1	1	1	1	1	1	1	1	4	1	1	1	1	1	1	1	1	1	4	1	1	4	4
MB-0284	5	5	5	5	5	5	5	5	5	5	5	5	5	5	5	5	1	5	5	5	5	5	5	5	5
MB-0459	2	2	2	2	2	2	2	2	2	2	1	2	2	2	2	1	2	1	2	2	1	2	1	2	2
MB-0128	1	1	1	1	1	1	1	1	1	1	1	1	1	1	1	1	1	1	1	1	1	1	1	1	1
MB-0639	5	5	5	5	5	5	5	5	5	5	5	5	5	5	5	5	5	5	5	5	5	5	5	5	5
MB-0318	4	4	4	4	4	4	4	4	4	4	4	4	4	5	4	4	1	5	4	4	4	4	4	4	5
MB-0417	1	1	1	1	1	1	2	1	2	1	1	1	1	1	1	1	1	1	1	1	1	2	1	2	1
MB-6238	1	1	1	1	1	1	1	1	1	1	1	1	1	1	1	1	1	1	1	1	1	1	1	1	1
MB-6286	1	1	1	1	1	1	1	1	1	1	1	1	1	1	1	1	1	1	1	1	1	1	1	1	1
MB-6328	1	1	2	2	1	1	1	1	2	2	2	1	1	1	1	1	1	2	1	2	2	1	1	2	2
MB-6284	2	2	2	2	2	2	2	2	2	2	2	2	2	2	2	2	2	2	2	2	2	2	2	2	2
MB-6363	3	3	3	3	1	3	3	3	3	3	5	3	3	3	3	3	3	3	2	3	3	3	3	3	5
MB-6224	3	3	3	3	3	3	3	3	3	3	3	3	3	3	3	3	3	3	3	3	3	3	3	3	3
MB-6297	1	1	1	1	1	1	1	1	1	1	1	1	1	1	1	1	1	1	1	1	1	1	1	1	1
MB-6239	1	1	1	1	1	1	1	1	1	1	1	1	1	1	1	1	1	1	1	1	1	1	1	1	1
MB-6208	1	1	1	1	1	1	1	1	1	1	1	1	1	1	1	1	1	1	1	1	1	1	1	1	1
MB-6273	1	1	1	1	1	1	1	1	1	1	1	1	1	1	1	1	1	1	1	1	1	1	1	1	1
MB-6344	2	2	2	2	2	2	2	2	2	1	2	2	2	2	2	2	2	2	1	2	1	2	2	2	2
MB-6312	2	2	2	2	2	2	2	2	1	1	2	2	1	2	2	2	2	2	2	2	2	2	2	2	2
MB-6212	1	1	1	1	1	1	1	1	1	1	1	1	1	1	1	1	1	1	1	1	1	1	1	1	1
MB-6302	2	2	2	2	2	2	2	2	2	2	2	2	2	2	2	2	2	2	2	2	2	2	2	2	2
MB-6327	1	1	2	2	2	2	1	2	1	1	1	2	1	2	2	1	2	1	1	2	1	1	1	1	1
MB-6287	2	2	2	2	2	2	2	2	2	2	2	2	2	2	2	2	2	2	2	2	2	2	2	1	2
MB-6213	1	1	1	1	1	1	1	1	1	1	1	1	1	1	1	1	1	1	1	1	1	1	1	1	1
MB-6251	5	5	5	5	5	5	5	5	5	5	5	5	5	5	5	5	5	5	5	5	5	5	5	5	5
MB-0489	4	4	4	4	4	4	4	4	4	4	4	4	4	4	4	4	4	4	4	4	4	4	4	4	5
MB-0335	INC	2	2	2	2	2	2	1	1	1	1	2	1	2	1	1	2	1	2	2	1	2	1	1	1
MB-0407	1	1	1	1	1	1	1	1	1	1	1	1	1	1	1	1	1	4	1	1	1	1	1	1	1
MB-0876	4	4	4	4	4	4	4	4	4	5	4	4	4	4	4	4	4	4	4	4	4	4	4	1	5
MB-0342	4	4	4	4	4	4	4	4	4	4	4	4	4	4	1	4	1	4	4	4	4	4	1	4	4
MB-7289	4	4	4	4	4	4	4	4	4	4	4	4	4	4	4	4	4	4	4	4	4	4	4	4	4
MB-3253	2	2	2	2	2	2	2	2	2	2	2	2	2	2	2	2	2	2	2	2	2	2	2	2	2
MB-7291	3	3	3	3	5	5	3	3	5	2	4	3	3	3	5	3	5	3	3	3	4	3	3	3	3
MB-7243	1	1	1	1	1	1	1	1	2	2	1	1	1	1	1	1	1	1	1	1	1	1	1	1	1
MB-3466	2	2	2	2	2	2	2	2	2	2	2	2	2	2	2	2	2	2	2	2	2	2	2	2	2
MB-7286	2	2	2	2	2	2	2	2	2	2	2	2	2	2	2	2	2	2	2	2	2	2	2	1	2
MB-7292	2	2	2	2	2	2	2	2	2	2	2	2	2	2	2	2	2	2	2	2	2	2	2	2	2
MB-7275	2	1	2	2	2	2	2	2	2	2	3	3	1	2	2	2	3	3	3	2	3	2	1	3	3
MB-7249	1	1	1	1	1	1	1	1	1	1	1	1	1	1	1	1	1	1	1	1	1	1	1	1	1
MB-7295	1	1	1	1	1	1	1	1	1	1	1	1	1	1	1	1	1	1	1	1	1	1	1	1	1
MB-7297	2	2	2	2	2	2	2	2	2	2	2	2	2	2	2	2	2	2	2	2	2	2	2	2	2
MB-7294	2	2	2	2	2	2	2	2	2	1	2	2	1	2	2	2	1	2	2	2	2	2	2	2	2
MB-7296	2	2	2	2	2	2	2	2	2	2	2	2	2	2	2	2	2	2	2	2	2	2	2	2	2
MB-3402	2	2	2	2	2	2	2	2	2	1	2	1	1	2	2	2	2	2	1	2	2	2	2	1	1
MB-5113	1	1	1	1	1	1	1	1	1	1	1	1	1	4	1	1	1	1	1	1	1	1	1	1	1
MB-5450	5	5	5	5	5	5	5	5	5	5	5	5	5	5	5	5	5	5	5	5	5	5	5	5	5
MB-7032	1	1	1	1	1	1	1	1	1	1	1	1	1	1	1	1	1	1	1	1	1	1	1	1	1
MB-7037	1	1	1	1	1	1	1	1	1	1	1	1	1	1	1	1	1	1	1	1	1	1	1	1	1
MB-7040	1	1	1	1	1	1	1	1	1	1	1	1	1	1	1	1	1	1	1	1	1	1	1	1	1
MB-7020	3	3	3	3	3	3	3	3	3	3	5	3	3	3	3	3	5	3	3	3	3	3	3	3	3
MB-7042	2	2	2	2	2	2	2	2	1	2	2	2	2	1	2	2	2	2	2	2	2	2	1	2	2
MB-7043	1	1	1	1	1	1	1	1	3	1	1	1	1	1	1	1	1	1	1	1	1	1	1	1	1
MB-7028	2	2	2	2	2	2	2	2	2	2	2	2	1	2	2	2	2	2	2	2	2	2	2	2	1
MB-7029	1	1	1	1	1	1	1	1	1	1	1	1	1	1	1	1	1	1	1	1	1	1	1	1	1
MB-7027	5	5	5	5	5	5	5	5	3	3	5	5	5	5	3	5	3	5	5	5	5	5	5	3	5
MB-7060	1	1	1	1	1	1	1	1	1	1	1	1	1	1	1	1	1	1	1	1	1	1	1	1	1
MB-7034	1	1	1	1	1	1	1	1	2	2	1	1	1	2	1	1	1	1	1	1	1	1	1	1	1
MB-5191	1	1	1	1	1	1	1	1	1	1	1	1	1	1	1	1	1	1	1	1	1	1	1	1	1
MB-5214	1	4	4	4	4	4	4	4	4	1	1	1	1	4	1	1	1	1	1	4	1	4	1	1	1
MB-5204	1	1	1	1	1	1	1	1	1	1	1	1	1	1	1	1	1	1	1	1	1	1	1	1	1
MB-5155	4	4	4	4	4	4	1	1	1	1	4	4	1	1	5	1	4	3	4	4	4	1	1	4	4
MB-5190	5	3	4	4	5	4	4	5	4	3	5	5	5	3	5	5	3	5	5	4	5	4	5	5	5
MB-5614	1	1	1	1	1	1	1	1	1	1	1	1	1	1	1	1	1	1	1	1	1	1	1	1	1
MB-5592	INC	1	2	2	1	1	1	1	1	1	2	2	2	2	1	2	1	2	2	2	2	1	1	1	2
MB-0437	2	2	2	2	2	2	2	2	2	2	2	2	2	2	2	2	2	2	2	2	2	2	2	2	2
MB-0028	2	2	2	2	2	2	2	2	2	2	2	2	2	2	2	2	2	2	2	2	2	2	2	2	2
MB-0309	1	1	1	1	1	1	1	1	1	1	1	1	1	1	1	1	1	1	1	1	1	1	1	1	1
MB-0100	5	5	5	5	5	5	5	5	5	5	5	5	5	5	5	5	5	5	5	5	5	5	5	5	5
MB-5648	1	1	1	1	1	1	1	1	1	1	1	1	1	1	1	1	1	1	1	1	1	1	1	1	1
MB-5572	5	5	5	5	5	5	5	5	5	5	5	5	5	5	5	5	3	5	5	5	5	5	5	5	5
MB-5655	5	5	5	5	5	5	5	5	5	5	5	5	5	5	5	5	5	5	5	5	5	5	5	5	5
MB-5577	3	3	3	3	2	3	3	1	2	2	3	3	3	2	3	2	1	3	3	3	3	3	2	1	3
MB-5585	1	1	1	1	1	1	1	1	1	1	1	1	1	1	1	1	1	1	1	1	1	1	1	1	1
MB-5620	1	1	1	1	1	1	1	1	1	2	1	1	1	1	1	1	1	1	1	1	1	1	1	1	1
MB-5652	4	4	4	4	4	4	4	4	4	4	4	4	4	4	4	4	4	4	4	4	4	4	4	4	4
MB-0537	4	4	4	4	4	4	4	4	4	4	4	4	1	4	4	4	1	4	4	4	4	4	4	4	4
MB-0544	INC	1	2	2	1	1	1	1	2	1	1	2	1	2	2	2	2	2	1	2	1	1	2	2	1
MB-0468	1	1	1	1	1	1	1	1	1	1	1	1	1	1	1	1	1	1	1	1	1	1	1	1	1
MB-0333	5	5	5	5	5	5	5	5	5	2	5	5	5	5	5	5	3	5	5	5	5	5	5	5	5
MB-0205	4	4	4	4	4	4	4	4	4	1	4	4	4	4	4	4	4	4	4	4	4	4	4	4	4
MB-0233	1	1	1	1	1	1	1	1	1	1	1	1	1	1	1	1	1	1	1	1	1	1	1	1	1
MB-0210	5	5	5	5	5	5	5	5	4	4	4	5	5	5	5	5	3	5	5	5	4	5	3	5	5
MB-0200	5	5	5	5	5	5	5	5	5	5	5	5	5	5	5	5	3	5	5	5	5	5	5	5	5
MB-0244	1	1	1	1	1	1	1	1	1	1	1	1	1	1	1	1	1	1	1	1	1	1	1	1	1
MB-5588	4	4	4	4	4	4	4	4	4	1	4	4	4	4	4	4	1	1	2	4	4	4	1	1	1
MB-5628	2	2	2	2	2	2	2	2	2	2	2	2	2	2	2	2	2	2	2	2	2	2	2	2	2
MB-5633	5	3	3	3	5	5	5	5	4	3	5	5	5	5	5	5	3	5	5	3	5	5	3	3	5
MB-0169	4	4	4	4	4	4	4	4	4	4	4	4	4	4	4	4	1	4	4	4	4	4	4	1	4
MB-0253	1	1	1	1	1	1	1	1	1	1	1	1	1	1	1	1	1	1	1	1	1	1	1	1	1
MB-0226	1	1	1	1	1	1	1	1	1	1	1	1	1	1	1	1	1	1	1	1	1	1	1	1	1
MB-0278	5	5	5	5	5	5	5	5	5	5	5	5	5	5	4	5	5	5	5	5	5	5	5	5	5
MB-0266	1	1	1	1	1	1	1	1	1	1	1	1	1	1	1	1	1	1	1	1	1	1	1	1	1
MB-0577	2	2	2	2	2	2	2	2	2	2	2	2	2	2	2	2	2	2	2	2	2	2	2	2	2
MB-0156	4	4	4	4	4	4	4	4	4	4	4	4	4	4	4	4	4	4	4	4	4	4	4	4	5
MB-0531	4	4	4	4	4	4	4	4	4	4	4	4	4	4	4	4	4	4	4	4	4	4	4	4	4
MB-0245	1	1	1	1	1	1	1	1	1	1	1	1	1	1	1	1	1	1	1	1	1	1	1	1	1
MB-5641	2	2	2	2	2	2	2	2	2	2	2	2	2	2	2	2	2	2	2	2	2	2	2	2	2
MB-5640	1	1	1	1	1	1	1	1	1	1	1	1	1	1	1	1	1	1	1	1	1	1	1	1	1
MB-0534	4	4	4	4	4	4	4	4	4	4	4	4	4	4	4	4	4	4	4	4	4	4	4	4	4
MB-0230	3	3	3	3	4	3	3	3	5	3	3	3	3	3	3	3	3	3	3	3	3	3	3	5	3
MB-0433	INC	4	4	4	1	1	4	1	4	1	4	1	1	1	1	4	1	1	4	4	4	4	4	1	1
MB-0109	2	2	2	2	2	2	2	2	2	1	2	2	2	2	2	2	2	2	2	2	2	2	2	2	2
MB-0304	2	2	2	2	2	2	2	2	2	2	2	2	2	2	2	2	2	2	2	2	2	2	2	2	2
MB-0369	2	2	2	2	2	2	2	2	2	2	2	2	2	2	2	2	2	2	2	2	2	2	2	2	2
MB-0627	3	3	3	3	3	5	5	3	3	2	3	3	5	4	3	3	3	3	3	3	3	5	3	3	3
MB-0492	2	2	2	2	2	2	2	2	1	2	2	2	2	2	2	2	1	2	2	2	2	2	2	2	1
MB-0147	1	1	1	1	1	1	1	1	2	1	1	1	1	1	1	1	2	1	1	1	1	1	1	1	1
MB-0442	1	4	4	4	1	1	1	1	4	1	4	1	1	4	1	1	1	4	4	4	4	1	1	1	1
MB-0111	1	1	1	1	1	1	1	1	1	1	1	1	1	1	1	1	1	1	1	1	1	1	1	1	1
MB-0634	4	4	4	4	4	4	4	4	4	4	4	4	4	4	4	4	4	4	4	4	4	4	4	4	5
MB-0329	1	2	1	1	2	1	1	1	1	2	1	1	2	1	1	1	2	1	1	1	1	1	1	1	1
MB-0280	1	1	1	1	1	1	1	1	1	1	1	1	1	1	1	1	1	1	1	1	1	1	1	1	1
MB-0490	1	1	1	1	1	1	1	1	1	1	1	1	1	1	1	1	1	1	1	1	1	1	1	1	1
MB-0885	4	4	4	4	5	4	4	4	4	4	4	4	4	4	5	4	4	4	4	4	4	4	5	5	5
MB-0178	2	2	2	2	2	2	2	2	2	2	2	2	2	2	2	2	2	2	2	2	2	2	2	2	2
MB-0242	1	1	1	1	1	1	1	1	1	1	1	1	1	1	1	1	2	1	1	1	1	1	1	2	1
MB-5624	5	5	5	5	5	5	5	5	5	5	5	5	5	5	5	5	5	5	5	5	5	5	5	5	5
MB-5593	3	3	3	3	3	3	3	3	3	3	3	3	3	3	3	3	1	3	3	3	3	3	3	3	3
MB-4010	INC	2	2	2	1	1	1	2	1	1	3	2	1	1	1	2	2	2	2	2	3	1	1	1	2
MB-5605	2	2	2	2	2	2	2	2	2	1	2	2	2	2	2	2	1	2	2	2	2	2	2	2	2
MB-5636	2	2	2	2	2	2	2	2	2	2	2	2	2	2	2	2	2	2	2	2	2	2	2	2	2
MB-4529	1	1	1	1	1	1	1	1	1	1	1	1	1	1	1	1	1	1	1	1	1	1	1	1	1
MB-5566	5	5	5	5	5	5	5	5	5	5	5	5	5	5	5	5	5	5	5	5	5	5	5	5	5
MB-0268	2	2	2	2	2	2	2	2	1	2	2	2	2	2	2	2	2	1	2	2	2	2	2	2	1
MB-0160	4	4	4	4	4	4	4	4	4	4	4	4	4	4	4	4	4	5	4	4	4	4	4	4	4
MB-0275	1	4	4	4	4	1	4	1	1	1	1	1	1	4	1	4	1	4	1	4	1	4	1	1	1
MB-0127	4	4	4	4	4	4	4	4	4	1	4	4	1	1	1	4	4	3	4	4	4	4	1	5	3
MB-0045	4	4	4	4	5	4	4	5	4	4	5	5	5	4	5	5	5	4	5	4	5	4	4	4	5
MB-0414	5	5	5	5	5	5	5	5	5	5	5	5	5	5	5	5	5	5	5	5	5	5	5	5	5
MB-0259	5	5	5	5	5	5	5	5	5	5	5	5	5	5	5	5	5	5	5	5	5	5	5	5	5
MB-0396	5	5	5	5	5	5	5	5	5	5	5	5	5	5	5	5	5	5	5	5	5	5	5	5	5
MB-0874	5	5	5	5	5	5	5	5	5	5	5	5	5	5	5	5	3	5	5	5	5	5	5	5	5
MB-0179	4	4	4	4	5	4	4	4	4	4	4	5	4	4	5	4	5	4	4	4	4	4	4	3	5
MB-0526	2	2	2	2	2	2	2	2	2	2	2	2	2	2	2	2	2	2	2	2	2	2	2	2	2
MB-0586	1	1	1	1	1	1	1	1	1	1	1	1	1	1	1	1	1	1	1	1	1	1	1	1	1
MB-0508	1	1	1	1	1	1	1	1	1	1	1	1	1	1	1	1	1	1	1	1	1	1	1	1	1
MB-0288	1	1	1	1	1	1	1	1	1	1	1	1	1	1	1	1	1	1	1	1	1	1	1	1	1
MB-0269	5	3	5	5	5	5	5	5	4	4	5	5	5	5	5	5	3	5	5	5	5	5	5	5	5
MB-0582	5	5	5	5	5	5	5	5	5	5	5	5	5	5	5	5	5	5	5	5	5	5	5	5	5
MB-0901	5	5	5	5	5	5	5	5	5	5	5	5	5	5	5	5	5	5	5	5	5	5	5	5	5
MB-0000	4	4	4	4	4	4	4	4	4	4	4	4	4	4	4	4	4	4	4	4	4	4	4	4	4
MB-0535	1	1	1	1	1	1	1	1	1	1	2	1	1	1	1	1	1	1	1	1	2	1	1	1	1
MB-0469	2	2	2	2	2	2	2	2	2	2	1	2	2	2	2	2	2	2	3	2	1	2	2	2	2
MB-0478	1	4	4	4	1	1	1	1	4	4	1	1	1	4	1	1	1	1	1	4	1	1	1	1	1
MB-0547	1	1	1	1	2	1	2	1	1	1	1	2	1	2	2	1	1	2	1	1	1	2	1	1	1
MB-0499	4	4	4	4	5	4	4	4	4	4	4	4	5	4	5	4	1	4	4	4	4	4	4	4	5
MB-0170	1	1	1	1	1	1	1	1	1	1	1	1	1	1	1	1	1	1	1	1	1	1	1	1	1
MB-0403	4	4	4	4	4	4	4	4	5	4	4	4	4	4	5	4	4	4	4	4	4	4	4	4	5
MB-0464	3	3	3	3	3	3	3	3	5	3	3	3	3	3	3	3	3	4	2	3	3	3	3	3	3
MB-0421	2	2	2	2	2	2	2	2	2	2	2	2	2	2	2	2	2	2	2	2	2	2	2	1	2
MB-0623	1	1	1	1	1	1	1	1	1	1	1	1	1	1	1	1	1	1	1	1	1	1	1	1	1
MB-0241	INC	3	3	3	3	5	5	2	1	1	3	3	5	4	5	4	3	5	3	3	3	5	2	3	5
MB-0163	5	5	5	5	5	5	5	5	5	5	5	5	5	5	5	5	5	5	5	5	5	5	5	5	5
MB-0149	5	5	5	5	5	5	5	5	5	5	5	5	5	5	5	5	5	5	5	5	5	5	5	5	5
MB-0153	5	3	5	5	5	5	5	5	4	4	4	5	4	5	5	5	1	5	4	5	4	5	5	3	5
MB-0350	5	5	5	5	5	5	5	5	5	5	5	5	5	5	5	5	5	5	3	5	5	5	5	3	5
MB-0512	1	1	1	1	1	1	1	1	1	1	1	1	1	1	1	1	1	1	1	1	1	1	1	1	1
MB-0020	4	4	4	4	4	4	4	4	4	4	1	4	1	4	4	4	5	4	4	4	1	4	4	4	4
MB-0046	1	2	1	1	1	1	2	1	1	1	1	1	1	1	1	1	1	1	1	1	1	2	2	1	1
MB-0134	1	1	1	1	1	1	1	1	2	1	1	1	1	1	1	1	1	1	1	1	2	1	1	1	1
MB-0495	3	3	3	3	4	3	3	3	3	3	4	3	1	5	1	3	1	5	3	3	4	3	3	3	5
MB-0470	4	4	4	4	4	4	4	4	5	4	4	4	4	5	4	4	4	5	4	4	4	4	4	4	5
MB-0872	1	4	4	4	1	1	1	1	4	1	1	1	1	1	1	1	1	1	1	4	1	1	1	1	1
MB-0661	1	1	1	1	1	1	1	1	1	2	2	1	1	1	1	1	1	1	1	1	1	1	1	1	1
MB-0339	1	1	1	1	1	1	1	1	1	1	1	1	1	1	1	1	1	1	1	1	1	1	1	1	1
MB-0264	1	1	1	1	1	1	1	1	1	1	1	1	1	1	1	1	1	1	1	1	2	1	1	1	1
MB-0175	1	1	1	1	1	1	1	1	2	1	1	1	1	1	1	2	1	2	2	1	1	1	1	2	1
MB-0303	5	5	5	5	5	5	5	5	5	5	5	5	5	5	5	5	5	5	5	5	5	5	5	5	5
MB-0172	1	1	1	1	1	1	1	1	1	1	1	1	1	1	1	1	1	1	1	1	1	1	1	1	1
MB-0125	1	1	1	1	1	1	1	1	1	1	1	1	1	1	1	1	1	1	1	1	1	1	1	1	1
MB-0340	5	5	5	5	5	5	5	5	5	2	4	5	5	5	5	5	3	5	5	5	4	5	3	5	5
MB-0234	2	2	2	2	1	2	2	1	1	1	2	2	2	1	2	1	2	2	1	2	2	2	1	1	1
MB-0487	4	4	4	4	4	4	4	4	4	4	4	4	4	1	1	1	4	1	4	4	4	4	4	1	1
MB-0305	1	1	1	1	4	1	1	1	1	1	1	1	1	1	1	1	1	1	1	1	1	1	1	1	1
MB-0390	3	3	3	3	3	3	3	3	3	2	3	3	5	5	3	3	5	3	3	3	3	3	3	3	5
MB-0502	5	4	5	5	5	5	5	5	4	5	4	4	5	5	5	5	1	5	5	5	4	5	4	5	5
MB-0663	3	3	3	3	3	3	3	3	3	3	3	3	3	3	5	3	3	3	3	3	3	3	3	3	3
MB-0130	1	1	1	1	1	1	1	1	1	1	1	1	1	1	1	1	1	1	1	1	1	1	1	1	1
MB-0289	5	4	4	4	4	5	4	4	5	5	5	4	5	5	4	5	5	5	5	4	5	4	5	3	5
MB-0129	3	3	3	3	5	5	5	3	5	3	3	5	5	3	5	3	3	3	4	3	3	5	1	3	5
MB-0343	1	1	1	1	1	1	1	1	1	1	1	1	1	1	1	1	1	1	1	1	1	1	1	1	1
MB-0458	4	4	4	4	4	4	4	4	4	4	4	4	4	4	4	4	4	4	4	4	4	4	4	4	4
MB-0570	2	2	2	2	2	2	2	2	2	2	2	2	2	2	2	2	2	2	2	2	2	2	2	2	2
MB-0281	4	4	4	4	4	4	4	4	4	4	4	4	4	4	4	4	4	4	4	4	4	4	4	4	4
MB-0488	4	4	4	4	4	4	4	4	4	4	4	5	4	4	4	5	1	4	4	4	4	4	4	5	5
MB-0655	1	1	1	1	1	1	1	1	1	1	1	1	1	4	1	1	1	1	1	1	1	1	1	1	1
MB-0235	1	1	1	1	1	1	1	1	1	1	1	1	1	1	1	1	1	1	1	1	1	1	1	1	1
MB-0484	2	2	2	2	1	1	2	2	2	2	2	2	2	2	2	1	2	2	2	2	2	2	2	2	1
MB-0436	3	3	3	3	3	3	3	3	3	3	5	3	3	3	3	3	1	5	3	3	5	3	3	3	3
MB-0299	5	5	5	5	5	5	5	5	5	5	5	5	5	5	5	5	5	5	5	5	5	5	5	5	5
MB-0877	2	2	2	2	2	2	2	2	2	2	2	2	2	2	2	2	2	2	2	2	2	2	2	2	2
MB-0097	1	1	1	1	1	1	1	1	1	1	1	1	1	1	1	1	1	1	1	1	1	1	1	1	1
MB-0897	1	1	4	4	1	1	1	1	1	1	1	1	1	1	1	1	1	4	1	4	1	1	1	1	1
MB-0095	2	2	2	2	2	2	2	2	2	2	2	2	2	2	2	2	2	2	2	2	2	2	2	2	2
MB-0227	1	1	1	1	1	1	1	1	1	1	1	1	1	1	1	1	1	1	1	1	1	1	1	1	1
MB-0353	1	1	1	1	1	1	1	1	1	1	1	1	1	1	1	1	1	2	1	1	1	1	1	1	1
MB-0522	3	3	3	3	4	3	1	1	3	3	3	3	3	1	3	3	3	4	3	3	3	1	3	4	4
MB-0543	2	3	3	3	2	5	2	3	2	2	2	2	2	3	2	2	2	2	4	3	2	2	2	2	2
MB-0196	1	4	4	4	4	1	1	4	4	1	1	1	1	1	1	1	1	1	5	4	1	1	1	4	1
MB-0646	1	2	2	2	1	1	1	1	1	1	1	1	1	2	1	1	2	2	1	2	1	1	2	1	1
MB-0293	4	4	4	4	4	4	4	4	4	4	4	4	4	4	4	4	4	4	4	4	4	4	4	4	4
MB-0552	3	3	3	3	3	3	3	1	3	3	1	3	3	4	5	1	3	5	4	3	1	3	3	3	3
MB-0260	1	1	1	1	1	1	1	1	1	1	1	1	1	1	1	1	1	1	1	1	1	1	1	1	1
MB-0326	1	1	1	1	1	1	1	1	4	1	1	1	1	1	1	1	1	1	1	1	1	1	1	1	1
MB-0256	1	1	1	1	1	1	1	1	1	1	1	1	1	1	1	1	1	1	1	1	1	1	1	1	1
MB-0539	5	3	5	5	4	5	5	5	5	5	4	3	3	5	4	5	3	4	5	5	4	5	5	5	5
MB-0626	2	2	2	2	2	2	2	2	2	2	2	2	2	2	2	2	2	2	2	2	2	2	2	2	2
MB-0355	1	1	1	1	1	2	1	1	2	1	1	1	1	1	1	1	1	2	2	1	1	1	1	2	1
MB-0211	INC	3	3	3	3	5	3	3	3	2	5	5	3	5	3	5	1	5	5	3	5	3	1	5	5
MB-0124	1	1	1	1	1	1	1	1	2	2	1	1	1	1	1	1	1	1	1	1	1	1	1	1	1
MB-0510	1	1	1	1	1	1	1	1	4	4	1	1	1	1	1	1	1	1	1	1	1	1	1	1	1
MB-0365	2	3	3	3	2	3	2	2	1	2	2	2	2	2	2	2	2	2	2	3	2	2	2	2	2
MB-0290	1	1	1	1	1	1	1	1	1	1	1	1	1	1	1	1	1	1	1	1	1	1	1	1	1
MB-0113	3	3	3	3	3	3	3	3	3	3	3	3	3	3	3	3	3	3	3	3	3	3	3	3	3
MB-0620	4	4	4	4	4	4	4	4	4	4	4	4	4	4	4	4	4	4	4	4	4	4	4	4	4
MB-0282	1	4	4	4	1	4	4	4	4	1	1	1	1	1	1	1	1	1	1	4	1	4	1	1	1
MB-0228	4	4	4	4	4	4	4	4	1	4	4	4	4	4	4	4	1	1	4	4	4	4	4	4	1
MB-0578	4	4	4	4	4	4	4	4	1	1	4	4	4	4	4	4	1	1	4	4	4	4	4	4	1
MB-0479	3	3	3	3	3	3	3	3	3	3	3	3	3	3	3	3	3	3	3	3	3	3	3	3	3
MB-0263	1	1	1	1	1	1	1	1	1	1	1	1	1	1	1	1	1	1	1	1	1	1	1	1	1
MB-0509	2	2	1	1	2	2	2	2	1	1	1	2	2	2	2	2	1	2	4	1	1	2	2	1	1
MB-0110	4	4	4	4	4	4	4	4	4	4	4	4	1	5	5	4	4	4	4	4	4	4	5	4	5
MB-0279	4	4	4	4	4	4	4	4	1	1	4	1	4	4	4	1	1	1	1	4	4	4	1	4	4
MB-0168	1	1	1	1	1	1	1	1	1	1	4	1	1	1	1	1	1	1	1	1	1	1	1	4	4
MB-0588	4	4	4	4	4	4	4	4	4	4	5	3	4	4	4	4	4	3	4	4	3	4	4	1	4
MB-0462	3	3	3	3	3	3	3	3	5	2	3	3	3	4	3	3	3	3	4	3	3	3	1	5	3
MB-0262	2	2	2	2	2	2	2	2	2	2	2	2	2	2	2	2	2	2	2	2	2	2	2	2	2
MB-0907	4	4	4	4	4	4	4	4	4	4	4	4	4	4	4	4	4	4	4	4	4	4	4	1	4
MB-0554	1	1	1	1	1	1	1	1	1	1	1	1	1	1	1	1	1	1	1	1	1	1	1	1	1
MB-0418	2	2	2	2	2	2	2	2	2	2	2	2	2	2	2	2	2	2	2	2	2	2	2	2	2
MB-0193	INC	2	2	2	2	1	1	1	2	2	1	1	1	1	1	2	2	1	2	2	1	1	2	1	2
MB-0652	2	1	2	2	2	2	2	2	2	2	2	1	3	2	2	1	1	1	2	2	1	2	1	1	1
MB-0638	4	4	4	4	1	1	1	1	4	1	4	4	4	4	1	1	1	4	1	4	4	1	1	4	4
MB-0188	3	3	3	3	2	2	2	3	2	2	3	3	2	3	3	3	3	3	3	3	3	2	3	3	3
MB-0617	4	4	4	4	4	4	4	4	4	4	4	4	1	4	4	4	4	4	4	4	4	4	5	4	5
MB-7225	5	5	5	5	5	5	5	5	5	5	5	5	5	5	5	5	5	5	5	5	5	5	5	5	5
MB-7141	1	1	1	1	1	1	1	1	1	1	1	1	1	1	1	1	1	1	1	1	1	1	1	1	1
MB-7234	1	1	1	1	1	2	1	1	1	1	2	2	2	1	1	1	1	2	2	1	2	1	1	1	1
MB-7089	5	5	5	5	5	5	5	5	5	5	5	5	5	5	5	5	3	5	5	5	5	5	5	5	5
MB-7030	5	5	5	5	5	5	5	5	5	5	4	4	5	5	5	4	1	5	4	5	4	5	5	5	5
MB-7004	1	1	1	1	1	1	1	1	1	1	1	1	1	1	1	1	1	1	1	1	2	1	1	1	1
MB-7119	5	5	5	5	5	5	5	5	5	5	5	5	5	5	5	5	5	5	5	5	5	5	5	5	5
MB-7263	2	2	2	2	2	2	2	2	2	2	2	2	2	2	2	2	2	2	2	2	2	2	2	2	2
MB-7012	5	5	5	5	5	5	5	5	5	5	5	5	5	5	5	5	5	5	5	5	5	5	5	5	5
MB-0174	5	5	5	5	5	5	5	5	5	5	5	5	5	5	5	5	5	5	5	5	5	5	5	5	5
MB-7182	2	2	2	2	2	2	2	2	2	2	2	2	2	2	2	2	2	2	2	2	2	2	2	2	2
MB-7039	4	4	4	4	4	4	4	4	1	1	4	4	1	1	4	1	3	3	4	4	4	4	1	4	4
MB-3797	INC	1	2	2	1	1	2	1	1	2	1	1	1	1	2	2	2	2	2	2	1	2	2	1	1
MB-7112	2	2	2	2	2	2	2	2	1	1	1	2	2	2	2	2	1	2	3	2	1	2	2	1	1
MB-0308	1	4	1	1	1	1	1	1	1	1	1	1	1	1	1	1	1	1	1	1	1	1	1	1	1
MB-7230	1	1	1	1	1	1	1	1	1	1	1	1	1	1	1	1	1	1	1	1	1	1	1	1	1
MB-5452	1	1	1	1	1	1	1	1	1	1	1	1	1	1	1	1	1	1	1	1	1	1	1	1	1
MB-6195	1	1	1	1	1	1	1	1	1	1	1	1	1	1	1	1	1	1	1	1	1	1	1	1	1
MB-6317	2	2	2	2	2	2	2	2	2	2	2	2	2	2	2	2	2	2	2	2	2	2	2	2	2
MB-5460	1	2	4	4	1	1	2	1	1	1	1	1	1	1	5	1	1	1	1	4	1	2	1	1	1
MB-5464	1	1	1	1	1	1	1	1	1	1	1	1	1	1	1	1	1	1	1	1	1	1	1	1	1
MB-5552	2	2	2	2	2	2	2	2	2	2	2	2	2	2	2	2	2	2	2	2	2	2	2	2	2
MB-5547	5	5	5	5	5	5	5	5	5	5	5	5	5	5	5	5	3	5	5	5	5	5	5	5	5
MB-6189	2	2	2	2	2	2	2	2	2	2	2	2	2	2	2	2	2	2	2	2	2	2	2	2	2
MB-6122	INC	3	4	4	5	4	4	4	1	3	4	1	4	4	5	4	1	1	4	4	1	4	1	1	1
MB-6192	2	2	2	2	2	2	2	2	2	2	2	2	2	2	2	2	2	1	3	2	2	2	2	2	2
MB-4820	1	1	1	1	1	1	1	1	2	1	1	1	1	1	1	1	1	1	1	1	1	1	1	1	1
MB-5527	3	3	3	3	3	3	3	3	3	3	4	5	3	5	3	3	3	5	5	3	4	3	3	3	3
MB-5167	2	2	2	2	2	2	2	2	2	2	2	2	2	2	2	2	2	2	2	2	2	2	2	2	2
MB-5465	5	5	5	5	5	5	5	5	5	5	5	5	5	5	5	5	5	5	5	5	5	5	5	5	5
MB-5453	4	4	4	4	4	4	4	4	4	4	4	4	4	4	4	4	4	4	4	4	4	4	4	4	4
MB-5471	1	1	1	1	1	1	1	1	1	1	2	1	1	1	1	1	1	1	1	1	2	1	1	1	2
MB-5127	2	2	2	2	2	2	2	2	1	2	2	1	2	1	2	1	2	2	2	2	2	2	1	1	1
MB-4313	1	1	1	1	4	1	1	1	1	1	1	1	1	1	1	1	1	1	1	1	1	1	1	1	1
MB-4823	3	3	3	3	4	4	3	3	3	3	3	3	3	3	3	3	3	4	3	3	3	3	3	3	3

## Sheet: Pred ROCK CM1
	Class	BayesNet	NaiveBayes	NaiveBayesUpdateable	Logistic	MultilayerPerceptron	SimpleLogistic	SMO	IBk	KStar	AttributeSelectedClassifier	Bagging	ClassificationViaRegression	LogitBoost	MultiClassClassifier	RandomCommittee	DecisionTable	JRip	PART	HoeffdingTree	J48	LMT	RandomForest	RandomTree	REPTree
GSM107072	1	1	1	1	2	1	1	1	1	2	1	1	1	2	2	1	2	1	2	1	1	1	1	1	1
GSM107073	2	2	2	2	2	2	2	2	2	2	2	2	2	2	2	2	2	2	2	2	2	2	2	2	2
GSM107075	1	1	4	4	1	1	1	1	1	2	2	1	1	1	1	1	1	2	1	4	2	1	1	2	1
GSM107076	INC	1	1	1	2	2	2	2	2	2	1	2	1	1	2	1	1	2	2	1	1	2	1	2	1
GSM107077	2	2	2	2	2	2	2	2	2	2	2	2	2	2	2	2	2	2	2	2	2	2	2	2	2
GSM107078	1	1	1	1	2	2	2	2	1	2	1	1	1	1	2	1	2	2	2	1	1	2	1	2	1
GSM107079	1	1	1	1	1	1	1	1	1	1	1	1	1	1	1	1	1	1	4	1	1	1	1	1	1
GSM107080	5	5	5	5	5	5	5	5	5	3	5	5	5	5	5	5	5	5	5	5	5	5	5	5	5
GSM107081	INC	4	4	4	4	4	1	1	4	3	2	1	1	1	1	1	1	4	4	4	2	1	1	1	1
GSM107082	5	5	5	5	5	5	5	5	5	5	5	5	5	5	5	5	5	5	5	5	5	5	5	5	5
GSM107083	1	1	1	1	1	1	1	1	1	1	1	1	1	1	1	1	2	1	1	1	1	1	1	1	1
GSM107084	2	2	2	2	2	2	2	2	2	2	2	2	2	2	2	2	2	2	2	2	2	2	2	2	1
GSM107085	2	2	2	2	2	2	2	2	2	2	2	2	2	2	2	2	2	2	2	2	2	2	2	2	2
GSM107086	1	1	1	1	1	1	1	1	1	1	1	1	1	1	1	1	1	2	1	1	1	1	1	2	1
GSM107087	2	2	2	2	2	2	2	2	2	2	2	2	2	2	2	2	2	2	2	2	2	2	2	2	1
GSM107088	2	2	2	2	2	2	2	2	2	2	2	2	2	2	2	2	2	2	2	2	2	2	2	2	1
GSM107089	2	2	1	1	2	2	2	2	2	2	2	2	1	1	2	2	2	1	2	1	2	2	2	2	1
GSM107090	5	5	5	5	5	5	5	4	5	5	4	2	2	5	5	5	1	5	5	5	4	5	5	2	1
GSM107091	1	1	1	1	1	1	1	1	1	1	1	1	1	1	1	1	2	2	1	1	1	1	1	2	1
GSM107092	2	2	2	2	2	2	2	1	1	2	1	2	1	2	2	2	2	2	1	2	1	2	1	2	1
GSM107093	2	2	2	2	2	2	2	2	2	2	2	2	2	2	2	2	2	2	2	2	2	2	2	2	2
GSM107094	2	2	2	2	2	2	2	2	1	2	2	2	2	2	2	2	2	2	2	2	2	2	2	2	1
GSM107095	1	1	1	1	2	2	1	1	2	2	2	1	1	1	1	1	1	2	1	1	2	1	1	2	1
GSM107096	1	1	1	1	1	1	1	1	1	1	1	1	1	1	1	1	1	1	1	1	1	1	1	1	1
GSM107097	2	2	2	2	2	2	2	2	2	2	2	2	1	2	2	2	2	1	2	2	2	2	2	2	1
GSM107098	1	1	1	1	1	1	1	1	1	1	1	1	1	1	1	1	1	1	1	1	1	1	1	1	1
GSM107099	2	2	2	2	2	2	2	2	2	2	2	2	2	2	2	2	2	2	2	2	2	2	2	2	2
GSM107100	4	4	4	4	4	4	4	4	4	1	4	1	4	1	4	4	1	1	1	4	4	4	4	1	1
GSM107101	3	3	3	3	5	3	3	3	3	2	4	3	3	3	5	3	5	3	4	3	4	3	3	5	3
GSM107102	3	3	3	3	3	2	3	3	3	2	3	5	3	3	2	3	3	5	3	3	3	3	5	5	3
GSM107103	1	1	1	1	1	1	1	1	1	1	1	1	1	1	1	1	2	1	1	1	1	1	1	1	1
GSM107104	1	1	1	1	1	1	1	1	1	1	1	1	1	1	1	1	1	1	1	1	1	1	1	2	1
GSM107105	1	1	1	1	1	1	1	1	1	1	1	1	1	1	1	1	1	1	1	1	1	1	1	2	1
GSM107106	1	1	1	1	2	2	1	1	1	1	1	1	1	2	1	1	1	1	1	1	1	1	1	2	1
GSM107107	2	2	2	2	2	2	2	2	2	2	2	2	2	2	2	2	2	2	2	2	2	2	2	2	2
GSM107108	1	1	1	1	1	1	1	1	1	1	1	1	1	2	1	1	2	2	1	1	1	1	1	2	1
GSM107109	3	2	3	3	2	3	2	3	3	2	3	3	3	3	2	3	5	3	3	3	3	2	3	5	3
GSM107110	2	2	2	2	2	2	2	2	2	2	2	2	2	2	2	2	2	2	2	2	2	2	2	2	2
GSM107111	1	1	1	1	1	1	1	1	1	1	1	1	1	1	1	1	1	1	1	1	1	1	1	1	1
GSM107112	1	1	1	1	2	2	1	1	2	2	1	1	1	1	1	1	1	2	1	1	1	1	1	2	1
GSM107113	2	2	2	2	2	2	2	2	2	2	2	2	2	2	2	2	1	2	1	2	2	2	2	2	1
GSM107114	1	1	1	1	1	1	1	1	1	1	1	1	1	1	1	1	1	1	1	1	1	1	1	2	1
GSM107115	5	5	5	5	5	5	5	5	5	5	4	5	5	5	5	5	5	5	4	5	4	5	5	5	5
GSM107117	1	1	1	1	1	1	1	1	1	1	1	1	1	1	1	1	1	1	1	1	1	1	1	1	1
GSM107118	1	1	1	1	1	1	1	1	1	1	1	1	1	1	1	1	1	1	1	1	1	1	1	1	1
GSM107119	INC	1	2	2	2	2	2	2	1	1	1	1	1	2	2	1	1	2	1	2	1	2	1	2	1
GSM107120	INC	1	1	1	2	2	2	2	2	2	2	1	1	1	2	1	1	2	1	1	2	2	1	2	1
GSM107121	2	1	1	1	2	2	2	2	2	1	2	2	2	2	2	2	1	2	1	1	2	2	2	2	2
GSM107122	4	4	4	4	4	4	4	4	4	1	1	1	4	4	1	1	1	5	4	4	1	4	1	4	1
GSM107123	2	2	2	2	2	2	2	2	2	2	2	2	2	2	2	2	2	2	2	2	2	2	2	2	2
GSM107124	1	4	4	4	1	1	1	1	1	1	1	1	1	1	1	1	1	1	1	4	1	1	1	1	1
GSM107125	INC	3	3	3	2	2	2	3	3	2	1	3	3	3	1	1	5	3	4	3	1	2	1	5	3
GSM107126	1	1	1	1	1	1	1	1	1	1	1	1	1	1	1	1	1	1	1	1	1	1	1	1	1
GSM107127	1	1	1	1	1	1	1	1	1	1	1	1	1	1	1	1	2	2	2	1	1	1	1	1	1
GSM107128	1	1	1	1	1	1	1	1	1	2	2	1	1	1	1	1	1	1	1	1	2	1	1	1	1
GSM107129	5	5	5	5	5	5	5	5	5	5	5	5	5	5	5	5	5	5	5	5	5	5	5	5	5
GSM107130	1	1	1	1	1	1	1	1	1	1	1	1	1	1	1	1	1	1	1	1	1	1	1	1	1
GSM107131	5	5	5	5	5	2	5	3	5	2	3	5	5	5	5	5	5	3	3	5	3	5	5	3	5
GSM107132	1	1	1	1	1	1	1	1	1	1	1	1	1	1	1	1	1	1	1	1	1	1	1	1	1
GSM107133	2	1	2	2	2	2	2	2	1	1	1	1	1	1	2	1	2	2	2	2	1	2	1	2	1
GSM107134	2	2	2	2	2	2	2	2	2	2	2	2	2	2	2	2	2	2	2	2	1	2	2	2	1
GSM107135	4	4	4	4	4	4	4	4	4	1	4	4	1	4	1	4	4	5	4	4	4	4	4	4	3
GSM107136	1	4	4	4	4	1	1	1	1	1	2	1	1	1	1	1	1	1	1	4	2	1	1	1	1
GSM107137	1	1	1	1	1	1	1	1	1	1	1	1	1	1	1	1	1	2	1	1	1	1	1	1	1
GSM107138	1	1	1	1	2	1	2	2	2	2	2	1	2	2	1	1	1	1	1	1	2	2	1	1	1
GSM107139	1	4	4	4	1	1	1	1	1	1	1	1	1	1	1	1	1	1	1	4	1	1	1	1	1
GSM107141	5	5	5	5	5	5	5	5	5	5	5	5	5	5	5	5	5	5	5	5	5	5	5	5	5
GSM107142	1	1	1	1	2	1	2	1	1	2	1	1	1	1	1	1	1	1	1	1	1	2	1	1	1
GSM107143	1	1	1	1	1	1	1	1	1	1	1	1	1	1	1	1	1	1	1	1	1	1	1	1	1
GSM107144	4	4	4	4	4	4	4	4	4	1	4	4	1	1	4	4	1	1	1	4	4	4	4	1	1
GSM107145	1	1	1	1	2	1	1	1	1	2	2	1	1	1	1	1	1	2	1	1	2	1	1	2	1
GSM107146	1	3	3	3	1	1	1	1	2	1	2	1	1	2	1	1	2	1	2	3	2	1	1	1	1
GSM107147	1	1	1	1	1	1	1	1	1	1	1	1	1	1	1	1	1	1	1	1	1	1	1	1	1
GSM107148	1	1	1	1	1	1	1	1	1	1	2	1	1	1	1	1	1	1	1	1	2	1	1	1	1
GSM107149	2	2	2	2	2	2	2	2	2	2	1	2	2	2	2	1	2	2	1	2	1	2	1	2	1
GSM107150	1	1	1	1	1	1	1	1	1	1	1	1	1	1	1	1	1	1	1	1	1	1	1	1	1
GSM107151	2	2	2	2	2	2	2	2	2	2	2	2	2	2	2	2	2	2	2	2	2	2	2	2	2
GSM107152	2	2	2	2	2	2	2	2	2	2	2	2	2	2	2	2	2	2	2	2	2	2	2	1	2
GSM107153	1	1	1	1	1	1	1	1	1	1	1	1	1	1	1	1	1	2	1	1	1	1	1	2	1
GSM107155	1	1	1	1	1	1	1	1	1	1	1	1	1	1	1	1	1	2	1	1	1	1	1	2	1
GSM107156	1	1	4	4	1	1	1	1	1	1	1	1	1	1	1	1	1	1	1	4	1	1	1	2	1
GSM107157	2	2	2	2	2	2	2	2	1	1	1	2	1	2	2	2	1	2	1	2	1	2	1	2	1
GSM107158	2	2	2	2	2	2	2	2	2	2	1	1	2	2	2	2	2	2	2	2	1	2	1	2	1
GSM107159	1	4	4	4	1	1	1	1	1	1	2	1	1	1	1	1	1	1	1	4	2	1	1	1	1
GSM107160	2	2	2	2	2	2	2	2	2	2	2	2	2	2	2	2	2	2	2	2	2	2	2	2	2
GSM107161	1	1	1	1	1	1	1	1	1	1	2	1	1	1	1	1	1	1	1	1	2	1	1	1	1
GSM107162	INC	1	1	1	2	2	2	1	1	2	1	1	1	2	2	2	2	2	2	1	1	2	1	2	1
GSM107163	2	2	3	3	2	2	2	2	1	2	2	2	2	2	2	2	2	2	2	3	2	2	3	2	2
GSM107164	1	1	1	1	1	1	1	1	1	1	2	1	1	1	1	1	1	1	1	1	2	1	1	1	1
GSM107165	1	1	1	1	1	1	1	1	1	1	1	1	1	1	1	1	1	1	1	1	1	1	1	1	1
GSM107166	5	5	4	4	5	5	5	5	5	2	4	5	5	2	5	5	5	3	4	4	4	5	3	5	5
GSM107167	1	1	1	1	1	1	1	1	1	1	1	1	1	1	1	1	1	1	1	1	1	1	1	1	1
GSM107168	2	2	2	2	2	2	2	2	2	2	2	2	2	2	2	2	2	1	2	2	2	2	2	2	1
GSM107169	1	1	4	4	1	1	1	1	1	1	1	1	1	1	1	1	1	1	1	4	1	1	1	1	1
GSM107171	1	1	1	1	1	1	1	1	1	1	1	1	1	1	1	1	1	2	1	1	1	1	1	2	1
GSM107172	1	1	1	1	1	1	1	1	1	1	1	1	1	1	1	1	1	2	1	1	1	1	1	1	1
GSM107173	1	1	1	1	1	1	1	1	1	1	1	1	1	1	1	1	2	1	1	1	1	1	1	1	1
GSM107174	1	1	1	1	2	2	1	1	1	1	1	1	1	1	1	1	1	1	1	1	1	1	1	2	1
GSM107175	4	4	4	4	4	4	4	4	4	4	4	4	1	4	4	4	1	4	4	4	4	4	4	4	1
GSM107176	1	4	4	4	1	1	1	1	1	1	1	1	1	1	1	1	1	1	1	4	1	1	1	1	1
GSM107178	2	2	2	2	2	2	2	2	2	2	2	2	2	2	2	2	2	2	2	2	2	2	2	2	2
GSM107179	2	2	2	2	2	1	2	2	1	2	1	1	1	2	2	2	2	2	1	2	1	2	2	2	1
GSM107180	1	1	1	1	1	1	1	1	1	1	1	1	1	1	1	1	2	1	1	1	1	1	1	1	1
GSM107181	1	1	1	1	2	2	2	1	1	2	1	1	1	1	1	1	1	2	1	1	1	2	1	1	1
GSM107182	1	1	1	1	1	1	1	1	1	1	2	1	1	1	1	1	1	1	1	1	2	1	1	1	1
GSM107184	1	1	1	1	1	1	1	1	1	1	1	1	1	1	1	1	1	1	1	1	1	1	1	1	1
GSM107185	1	4	4	4	1	1	1	1	1	1	1	1	1	1	1	1	1	1	1	4	1	1	1	1	1
GSM107186	4	4	4	4	4	4	4	4	5	1	4	4	1	4	4	4	4	5	4	4	4	4	1	1	5
GSM107187	1	1	1	1	1	1	1	1	1	1	1	1	1	1	1	1	1	1	1	1	1	1	1	2	1
GSM107188	1	1	1	1	1	1	1	1	1	1	1	1	1	1	1	1	1	1	1	1	1	1	1	1	1
GSM107189	1	1	1	1	1	1	1	1	1	1	1	1	1	1	1	1	1	2	1	1	1	1	1	2	1
GSM107190	1	1	1	1	1	1	1	1	1	1	1	1	1	1	1	1	1	1	1	1	1	1	1	1	1
GSM107191	5	5	5	5	5	5	5	5	5	2	5	5	5	5	5	5	5	5	5	5	5	5	5	5	5
GSM107192	2	2	2	2	2	2	2	2	2	2	2	2	2	2	2	2	2	2	2	2	2	2	2	2	2
GSM107194	2	2	2	2	2	2	2	2	2	2	2	2	2	2	2	2	2	2	2	2	2	2	2	2	2
GSM107195	3	3	3	3	3	2	3	3	3	3	3	3	3	3	2	3	3	3	4	3	3	3	2	3	3
GSM107196	5	5	5	5	5	5	5	5	5	3	5	5	5	5	5	5	5	5	5	5	5	5	5	5	5
GSM107197	2	2	2	2	2	2	2	2	2	2	2	2	2	2	2	2	2	2	2	2	2	2	2	1	1
GSM107198	5	5	5	5	5	5	5	5	5	2	5	5	5	5	5	5	5	5	5	5	5	5	5	5	5
GSM107199	2	2	2	2	2	2	2	2	2	2	2	2	1	2	2	2	2	2	2	2	2	2	2	2	1
GSM107200	2	2	2	2	2	2	2	2	1	1	1	1	1	1	2	1	2	2	1	2	1	2	1	2	1
GSM107201	2	2	2	2	2	2	2	2	1	1	1	2	2	2	2	2	2	2	2	2	1	2	1	2	1
GSM107202	1	1	1	1	2	1	1	1	2	2	1	1	1	2	2	1	2	2	2	1	1	1	1	2	1
GSM107203	2	2	2	2	2	2	2	2	2	2	2	2	2	2	2	2	2	2	2	2	2	2	2	1	1
GSM107204	5	5	5	5	5	5	5	5	5	5	4	2	2	5	5	5	5	5	5	5	4	5	5	5	1
GSM107205	INC	1	3	3	2	2	2	1	1	2	4	3	3	3	1	3	3	3	3	3	4	2	1	5	3
GSM107206	3	3	3	3	2	2	3	3	3	3	3	3	3	3	2	3	3	3	3	3	3	3	3	5	3
GSM107207	1	1	1	1	1	1	1	1	1	1	1	1	1	1	1	1	1	1	1	1	1	1	1	2	1
GSM107208	2	2	3	3	2	2	2	2	1	2	1	2	2	2	2	2	2	1	2	3	1	2	2	1	1
GSM107209	1	1	1	1	1	1	1	1	1	1	1	1	1	1	1	1	1	1	1	1	1	1	1	1	1
GSM107210	2	2	2	2	2	2	2	2	1	2	1	2	2	2	2	1	2	2	1	2	1	2	2	2	2
GSM107211	2	2	2	2	2	2	2	2	1	2	1	2	2	2	2	2	2	2	2	2	2	2	2	1	2
GSM107212	1	1	1	1	1	1	1	1	2	1	1	1	1	1	1	1	1	1	1	1	1	1	1	1	1
GSM107213	1	1	1	1	1	1	1	1	1	1	1	1	1	1	1	1	1	1	1	1	1	1	1	2	1
GSM107214	1	1	1	1	1	1	1	1	1	1	1	1	1	1	1	1	1	1	1	1	1	1	1	1	1
GSM107215	5	5	5	5	5	5	5	4	5	1	4	5	5	5	5	5	3	5	4	5	4	5	5	5	5
GSM107216	1	1	1	1	1	1	1	1	4	1	1	1	1	1	1	1	1	1	1	1	1	1	1	1	1
GSM107217	5	5	5	5	5	5	5	5	5	2	3	5	3	5	5	5	3	3	3	5	3	5	5	5	5
GSM107218	5	5	5	5	5	5	5	5	5	5	5	5	5	4	5	5	3	5	5	5	5	5	5	5	5
GSM107219	3	3	3	3	3	3	3	3	3	2	4	3	3	3	3	3	3	3	3	3	4	3	1	5	3
GSM107220	2	2	2	2	2	2	2	2	2	1	1	2	1	2	2	2	2	2	2	2	1	2	1	1	2
GSM107221	1	1	1	1	1	1	1	1	1	1	1	1	1	1	1	1	1	1	1	1	1	1	1	1	1
GSM107222	2	2	2	2	2	2	2	2	1	2	1	2	1	2	2	2	2	2	2	2	1	2	2	2	1
GSM107223	INC	4	4	4	4	4	4	4	1	1	2	1	1	4	1	1	1	1	1	4	2	4	1	1	1
GSM107224	2	2	2	2	2	2	2	2	2	1	2	2	2	1	2	2	2	2	2	2	2	2	2	2	1
GSM107225	1	1	1	1	2	2	2	2	1	1	1	1	1	2	2	1	1	1	1	1	1	2	1	2	1
GSM107226	2	2	2	2	2	2	2	2	2	2	2	2	2	2	2	2	2	2	2	2	2	2	2	2	2
GSM107227	2	2	2	2	2	2	2	2	1	1	1	2	1	1	2	1	2	2	2	2	1	2	2	2	1
GSM107228	2	2	2	2	2	2	2	2	2	2	2	2	2	2	2	2	2	3	2	2	2	2	2	2	2
GSM107229	5	5	5	5	5	5	5	5	5	2	5	2	5	5	5	5	1	5	1	5	5	5	5	5	1
GSM107230	1	1	1	1	1	1	1	1	1	2	1	1	1	1	1	1	1	2	1	1	1	1	1	2	1
GSM107231	2	2	2	2	2	2	2	2	2	2	1	2	2	2	2	2	1	2	1	2	1	2	2	2	1
GSM136326	5	5	5	5	5	5	5	5	5	2	5	5	5	5	5	5	5	5	5	5	5	5	5	3	5
GSM136327	4	4	4	4	4	4	4	4	1	4	2	1	1	4	4	4	1	1	4	4	2	4	1	1	1
GSM136328	INC	1	1	1	4	2	2	2	2	2	1	1	2	2	2	1	1	5	1	1	1	2	1	2	1
GSM136329	4	4	4	4	4	4	4	4	4	4	4	4	1	5	4	5	5	5	4	4	4	4	4	1	5
GSM136330	4	4	4	4	4	4	4	4	4	4	4	5	5	4	2	4	3	5	4	4	4	4	4	5	5
GSM136331	5	5	5	5	5	5	5	5	5	3	5	5	5	5	5	5	5	5	5	5	5	5	5	5	5
GSM136335	5	5	5	5	5	5	5	5	5	5	5	5	5	5	5	5	5	5	5	5	5	5	5	5	5
GSM136337	4	4	4	4	4	4	4	4	4	4	1	1	1	4	4	1	1	5	4	4	1	4	1	4	1
GSM136338	5	5	5	5	5	5	5	5	5	5	5	5	5	5	5	5	5	5	5	5	5	5	5	3	5
GSM136339	INC	2	4	4	5	2	3	3	4	1	4	4	3	2	2	5	3	3	3	4	4	3	1	5	5
GSM136340	5	5	4	4	5	2	5	5	5	1	4	5	5	5	5	5	5	5	3	4	4	5	1	5	5
GSM136341	4	4	4	4	4	4	4	4	4	1	4	4	1	4	4	4	5	5	4	4	4	4	4	2	5
GSM136342	1	1	1	1	1	1	1	1	2	2	1	1	1	1	1	1	1	2	1	1	1	1	1	2	1
GSM136343	5	5	5	5	5	5	5	5	5	2	2	2	3	5	5	5	1	5	1	4	2	5	1	2	2
GSM136344	1	1	4	4	4	1	1	1	1	1	1	1	1	1	1	1	1	5	1	4	1	1	1	2	1
GSM136345	1	1	1	1	1	1	1	1	1	1	1	1	1	1	1	2	2	1	2	1	1	1	1	2	1
GSM136346	INC	2	4	4	5	2	5	5	3	2	2	2	2	5	5	1	5	5	5	4	2	5	5	2	1
GSM136347	2	2	2	2	2	2	2	2	2	2	2	2	2	2	2	2	2	2	2	2	2	2	2	2	1
GSM136348	2	2	3	3	2	2	2	2	2	2	2	2	2	2	2	2	1	2	2	3	2	2	2	1	2
GSM136349	INC	4	4	4	4	4	4	4	4	1	1	1	1	1	4	4	1	5	1	4	1	4	1	2	1
GSM136350	2	1	2	2	2	2	2	2	1	2	2	2	2	2	2	1	1	1	2	2	2	2	2	2	1
GSM136351	2	1	1	1	1	2	2	2	2	2	2	2	2	2	2	2	1	2	1	1	2	2	2	1	2
GSM136352	5	5	5	5	5	2	5	5	5	2	4	5	3	2	5	3	3	3	4	5	4	5	5	3	5
GSM136353	2	2	3	3	2	2	2	2	2	2	2	2	2	2	2	2	2	3	2	3	2	2	2	3	2
GSM136354	1	1	1	1	1	1	1	1	1	2	1	1	1	1	1	1	1	1	1	1	1	1	1	1	1
GSM136355	1	1	1	1	1	2	1	1	1	1	1	2	1	1	1	1	2	2	1	1	1	1	1	2	1
GSM136356	4	4	4	4	4	4	4	4	5	1	4	4	5	5	4	4	5	5	1	4	4	4	1	3	5
GSM136357	4	4	4	4	4	4	4	4	4	1	2	1	4	4	4	1	5	5	4	4	2	4	1	2	1
GSM136358	4	4	4	4	4	4	4	1	4	1	4	4	4	3	4	3	5	5	4	4	4	4	1	3	3
GSM136359	1	1	1	1	1	1	1	1	1	2	1	1	1	1	1	1	1	1	1	1	1	1	1	2	1
GSM136360	INC	2	3	3	4	3	2	2	3	2	3	5	3	5	2	4	3	3	4	3	3	2	1	3	3
GSM136361	1	4	4	4	1	1	1	1	1	1	2	1	1	1	1	1	1	2	1	4	2	1	1	1	1
GSM136362	1	4	4	4	4	1	1	1	1	1	1	1	1	1	1	1	1	1	1	4	1	1	1	4	1
GSM136363	1	1	4	4	1	1	1	1	1	1	2	2	2	1	1	1	1	2	1	4	2	1	1	2	1
GSM136364	4	4	4	4	4	4	4	4	5	4	4	5	5	2	2	5	3	5	3	4	4	4	4	5	5
GSM136365	5	5	5	5	5	2	5	5	5	5	5	2	5	4	5	5	5	5	1	5	5	5	1	4	1
GSM136366	1	1	1	1	2	2	2	1	2	2	1	2	1	2	2	1	1	2	1	1	1	2	1	2	1
GSM136367	INC	4	4	4	5	4	4	4	4	1	2	1	4	4	5	1	5	5	1	4	2	4	1	2	1
GSM136368	5	5	5	5	5	5	5	5	5	5	5	5	5	5	5	5	5	5	5	5	5	5	5	5	5
GSM136369	3	3	3	3	3	3	3	3	3	2	1	5	3	3	2	3	3	3	3	3	1	3	1	5	3
GSM136370	4	4	4	4	4	4	4	4	4	4	5	1	1	4	4	4	5	4	4	4	5	4	4	4	1
GSM136371	3	3	3	3	4	3	3	3	1	2	4	5	3	5	2	3	3	3	4	3	4	3	1	3	5
GSM136372	INC	1	4	4	4	2	2	1	3	1	2	2	2	1	2	1	1	5	1	4	2	2	1	2	1
GSM136373	1	4	4	4	4	4	4	4	3	1	1	1	1	1	1	1	1	1	1	4	1	4	1	1	1
GSM136374	5	5	5	5	5	5	5	5	5	2	5	5	5	5	5	5	5	5	5	5	5	5	5	3	5
GSM136375	INC	4	4	4	4	4	4	4	1	1	1	1	1	4	1	1	1	4	4	4	1	4	1	1	1
GSM136376	2	1	2	2	4	2	2	2	1	2	2	1	2	1	2	1	2	1	2	2	2	2	1	2	1
GSM136377	5	5	5	5	5	2	5	4	5	2	5	5	5	5	5	5	3	5	5	5	5	5	5	3	5
GSM136378	4	4	4	4	4	5	4	4	4	2	4	4	5	5	2	5	3	5	4	4	4	4	1	5	5
GSM136379	5	5	5	5	5	5	5	5	5	2	5	5	5	5	5	5	5	5	5	5	5	5	5	3	5
GSM136381	2	1	2	2	2	2	2	1	1	2	1	2	1	1	2	1	2	2	1	2	1	2	1	2	2
GSM136382	1	1	1	1	1	1	1	1	1	1	1	1	1	1	1	1	1	1	1	1	1	1	1	1	1
GSM136383	5	5	5	5	5	5	5	5	5	5	5	5	5	5	5	5	5	5	5	5	5	5	5	3	5
GSM136384	INC	4	4	4	4	2	2	4	2	1	4	4	3	1	2	2	5	5	4	4	4	2	5	3	3
GSM136386	5	3	4	4	5	4	5	5	4	2	5	5	5	5	5	5	3	5	5	4	5	5	5	5	5
GSM136387	5	5	5	5	5	2	5	5	5	2	5	5	5	5	5	5	5	5	5	5	5	5	5	5	5
GSM136388	1	1	1	1	2	2	1	1	1	1	1	1	1	1	1	1	1	2	1	1	1	1	1	2	1
GSM136389	4	4	4	4	4	4	4	4	4	4	4	5	5	4	4	4	5	5	4	4	4	4	4	2	5
GSM136390	1	1	1	1	1	1	1	1	1	1	1	1	1	1	1	1	1	1	1	1	1	1	1	1	1
GSM136391	5	5	5	5	5	5	5	5	5	2	2	2	3	5	5	5	1	5	1	5	2	5	5	3	1
GSM136392	1	1	1	1	1	1	1	1	1	1	1	1	1	1	1	1	1	2	1	1	1	1	1	1	1
GSM136393	1	1	1	1	2	2	2	1	1	1	1	1	1	1	1	1	1	2	1	1	1	2	2	2	1
GSM136394	INC	4	4	4	5	2	2	4	5	2	2	2	3	4	5	4	1	5	5	4	2	2	1	2	1
GSM136395	2	2	2	2	2	2	2	2	2	2	1	2	2	2	2	2	2	2	2	2	1	2	2	2	2
GSM136396	2	2	2	2	2	2	2	2	2	2	2	2	3	2	2	2	2	2	2	2	2	2	3	2	2
GSM136397	1	1	1	1	1	1	1	1	1	1	1	1	1	1	1	1	1	2	1	1	1	1	1	2	1
GSM136398	2	2	2	2	2	2	2	2	2	2	1	2	2	2	2	2	2	2	2	2	1	2	2	1	2
GSM136399	1	1	1	1	2	1	2	1	1	2	2	2	1	1	1	1	1	1	1	1	2	2	1	2	1
GSM136401	2	2	3	3	2	2	2	2	2	2	2	2	2	2	2	2	2	2	2	3	2	2	2	2	2
GSM136402	1	1	1	1	1	1	1	1	1	1	1	1	1	1	1	1	1	1	1	1	1	1	1	1	1
GSM136403	1	1	1	1	2	2	2	1	1	2	1	2	1	1	2	1	2	2	2	1	1	2	1	2	1
GSM136404	4	4	4	4	4	4	4	4	4	1	4	4	5	5	5	5	3	5	3	4	4	4	1	5	5
GSM136405	INC	4	4	4	4	4	4	4	1	1	2	1	1	4	1	1	1	2	1	4	2	4	1	2	1
GSM136406	INC	4	4	4	4	4	3	3	1	2	1	5	4	3	1	4	3	2	4	4	1	3	3	3	5
GSM136407	1	1	1	1	1	2	1	1	2	2	1	1	1	2	1	2	2	2	2	1	1	1	1	2	1
GSM136408	3	3	3	3	4	4	3	3	3	2	3	5	4	5	2	3	3	3	4	3	3	3	1	3	3
GSM136409	4	4	4	4	4	4	4	4	4	1	2	1	1	4	4	1	1	4	1	4	2	4	1	1	1
GSM136410	1	1	2	2	1	1	1	1	1	2	1	1	1	2	1	2	2	1	2	2	1	1	2	2	1
GSM136411	1	1	4	4	1	1	1	1	1	1	1	1	2	1	1	1	1	2	1	4	1	1	1	1	1
GSM136412	4	4	4	4	4	4	4	4	5	4	4	5	5	5	2	4	3	5	3	4	4	4	5	5	5
GSM136413	INC	4	5	5	5	5	4	4	5	1	4	1	4	1	5	4	1	5	4	5	4	4	1	2	1
GSM136414	2	2	2	2	2	2	2	2	2	2	1	2	1	2	2	2	2	2	2	2	1	2	2	2	2
GSM136415	INC	4	4	4	5	5	5	4	4	3	4	5	5	5	5	4	5	5	4	4	4	5	5	3	5
GSM136416	5	5	5	5	5	5	5	5	5	5	5	5	5	5	5	5	5	5	5	5	5	5	5	5	5
GSM136417	3	3	3	3	3	2	2	3	3	2	1	3	3	3	3	1	3	3	3	3	1	2	3	5	3
GSM136418	5	5	5	5	5	5	5	5	5	5	5	5	5	5	5	5	5	5	5	5	5	5	5	3	5
GSM136419	3	3	3	3	3	2	2	3	3	2	1	3	5	3	2	3	3	5	3	3	1	2	3	3	5
GSM136420	2	2	3	3	3	2	2	2	2	2	2	2	2	2	2	2	2	2	2	3	2	2	2	2	1
GSM150794	1	1	1	1	1	1	1	1	1	2	1	1	1	1	1	1	1	1	1	1	1	1	1	2	1
GSM150795	4	4	4	4	4	4	4	4	4	1	4	1	1	1	4	4	4	1	1	4	4	4	1	1	1
GSM150796	INC	3	3	3	2	2	2	3	1	2	1	3	3	1	1	1	3	3	3	3	1	2	1	5	3
GSM150797	4	4	4	4	4	4	4	4	4	4	4	4	1	4	4	4	1	5	4	4	4	4	1	4	1
GSM150798	4	4	4	4	4	4	4	4	4	4	4	4	4	1	4	4	4	1	4	4	4	4	1	4	1
GSM150799	1	1	1	1	1	1	1	1	1	1	1	1	1	1	1	1	1	1	1	1	1	1	1	1	1
GSM150800	4	4	4	4	4	4	4	4	4	4	4	4	4	4	4	4	1	1	4	4	4	4	1	4	1
GSM150801	4	4	4	4	4	4	4	4	4	1	4	1	1	1	4	4	1	5	1	4	4	4	4	1	1
GSM150802	2	2	2	2	2	2	2	1	1	1	1	2	2	1	1	2	2	2	1	2	1	2	1	1	1
GSM150803	1	4	4	4	4	4	1	4	4	4	1	1	1	1	1	1	1	4	1	4	1	1	1	1	1
GSM150804	3	3	3	3	4	4	3	3	3	3	3	3	5	3	1	3	3	3	4	3	3	3	1	3	5
GSM150805	3	3	3	3	3	3	3	3	3	3	1	3	3	3	3	3	3	3	3	3	1	3	3	3	3
GSM150943	1	4	4	4	4	4	1	1	1	1	4	1	1	1	4	1	1	1	1	4	4	1	1	1	1
GSM150944	1	4	4	4	4	4	1	1	1	1	1	1	1	1	1	1	1	2	1	4	1	1	1	1	1
GSM150945	2	2	2	2	2	2	2	2	2	2	2	2	1	2	2	2	2	2	2	2	2	2	2	2	1
GSM150946	2	2	2	2	2	2	2	2	2	2	2	2	2	2	2	2	2	2	2	2	2	2	2	2	2
GSM150947	1	1	1	1	1	1	1	1	1	1	2	1	1	1	1	1	1	2	1	1	2	1	1	2	1
GSM150948	1	1	1	1	2	2	1	1	1	2	1	1	1	1	1	1	1	2	1	1	1	1	1	2	1
GSM150949	2	1	2	2	2	2	2	1	2	2	1	1	1	2	2	2	1	2	1	2	1	2	1	2	1
GSM150950	2	2	2	2	2	2	2	2	2	2	2	2	2	2	2	2	2	2	2	2	2	2	2	2	2
GSM150951	2	2	2	2	2	2	2	2	2	2	1	2	1	1	2	1	2	2	2	2	1	2	2	1	1
GSM150952	1	1	1	1	1	1	1	1	1	1	2	1	1	1	1	1	1	2	1	1	2	1	1	2	1
GSM150953	1	1	1	1	1	1	1	1	1	1	1	1	1	1	1	1	1	1	1	1	1	1	1	1	1
GSM150954	1	4	4	4	4	4	1	1	4	1	4	4	1	1	1	1	1	1	1	4	4	1	1	1	1
GSM150955	1	1	1	1	2	2	2	1	2	2	1	1	1	1	1	1	1	2	1	1	1	2	1	2	1
GSM150956	2	2	2	2	2	2	2	2	2	2	2	2	2	2	2	2	2	2	2	2	2	2	2	2	2
GSM150957	2	2	4	4	2	1	2	2	2	2	2	1	2	2	2	1	1	2	3	4	2	2	2	2	1
GSM150958	1	1	1	1	1	1	1	1	1	1	1	1	1	1	1	1	1	2	1	1	1	1	1	1	1
GSM150959	2	2	2	2	2	2	2	2	2	2	1	2	1	2	2	2	2	2	1	2	1	2	1	2	1
GSM150960	2	2	2	2	2	2	2	2	2	2	2	2	2	2	2	2	2	2	2	2	2	2	2	2	2
GSM150961	2	2	2	2	2	2	2	2	2	2	2	2	2	2	2	2	2	5	2	2	2	2	2	2	1
GSM150962	2	2	2	2	2	2	2	2	2	2	2	2	2	2	2	2	2	2	2	2	2	2	2	2	1
GSM150963	1	1	1	1	1	1	1	1	1	1	2	1	1	1	1	1	1	2	1	1	2	1	1	2	1
GSM150964	2	2	2	2	2	2	2	2	2	1	1	2	1	2	2	2	2	2	2	2	1	2	2	2	1
GSM150965	1	1	1	1	1	1	1	1	1	2	2	1	1	1	1	1	1	2	1	1	2	1	1	1	1
GSM150966	1	1	2	2	2	2	2	1	1	2	1	1	1	2	2	1	2	1	1	2	1	2	1	1	1
GSM150967	2	2	2	2	2	2	2	2	2	2	2	2	2	2	2	2	1	2	3	2	2	2	2	2	1
GSM150968	1	1	1	1	1	1	1	1	1	1	1	1	1	1	1	1	1	1	1	1	1	1	1	1	1
GSM150969	2	2	2	2	2	2	2	2	1	1	2	2	2	2	2	1	2	2	1	2	2	2	2	2	1
GSM150970	2	2	2	2	2	2	2	2	1	1	2	2	1	2	2	2	2	2	2	2	2	2	2	2	1
GSM150971	2	2	2	2	2	2	2	2	2	2	2	2	2	2	2	2	2	2	2	2	2	2	2	2	2
GSM150972	2	2	2	2	2	2	2	2	2	2	2	1	2	2	2	2	1	2	3	2	2	2	2	2	1
GSM150973	1	1	1	1	2	2	1	1	2	1	2	1	1	1	1	1	1	2	2	1	2	1	1	2	1
GSM150974	1	1	1	1	1	1	1	1	1	1	2	1	1	1	1	1	2	1	1	1	2	1	1	1	1
GSM150975	2	2	2	2	2	2	2	2	1	1	2	2	1	1	2	2	2	2	2	2	2	2	2	2	1
GSM150976	2	2	2	2	2	2	2	2	2	2	2	2	2	2	2	2	2	2	2	2	2	2	2	2	2
GSM150977	2	2	2	2	2	2	2	2	1	1	1	2	2	2	2	2	2	2	2	2	1	2	2	2	1
GSM150978	1	1	1	1	1	1	1	1	1	1	1	1	1	1	1	1	1	1	1	1	1	1	1	2	1
GSM150979	1	1	1	1	2	2	1	1	1	2	1	1	1	1	1	1	1	1	1	1	1	1	1	1	1
GSM150980	1	1	1	1	1	1	1	1	1	1	1	1	1	1	1	1	1	2	1	1	1	1	1	2	1
GSM150981	1	1	1	1	2	2	2	2	1	1	1	1	1	1	2	1	2	2	2	1	1	2	1	2	1
GSM150982	2	2	2	2	2	2	2	2	2	2	2	2	1	2	2	2	2	2	2	2	2	2	2	2	1
GSM150983	2	2	2	2	2	2	2	2	2	2	2	2	2	2	2	2	2	2	2	2	2	2	2	2	1
GSM150984	2	2	2	2	2	2	2	2	1	1	2	2	1	2	2	2	2	2	2	2	2	2	2	2	1
GSM150985	2	1	1	1	2	2	2	2	2	2	1	1	2	2	2	2	1	2	1	1	1	2	1	2	1
GSM150986	1	1	1	1	2	2	2	1	1	1	1	1	1	1	2	1	1	5	1	1	1	2	1	2	1
GSM150987	1	1	1	1	1	2	1	1	1	2	1	1	1	1	1	1	2	2	1	1	1	1	1	2	1
GSM150988	2	2	2	2	2	2	2	2	1	1	1	2	1	2	2	2	2	2	2	2	1	2	2	2	1
GSM150989	2	2	2	2	2	2	2	2	2	2	1	2	2	2	2	2	2	2	2	2	1	2	1	2	1
GSM150990	1	1	1	1	1	2	1	1	1	2	1	1	1	1	2	1	2	2	2	1	1	1	1	2	1
GSM150991	1	1	1	1	2	2	2	1	2	2	1	1	1	1	2	1	2	2	1	1	1	2	1	2	1
GSM150992	INC	4	4	4	4	4	2	4	1	1	2	2	2	3	1	1	5	2	1	4	2	2	3	2	1
GSM150993	2	1	2	2	2	2	2	2	1	2	1	1	1	2	2	2	1	2	1	2	1	2	1	2	1
GSM150994	INC	1	2	2	2	2	2	2	2	1	1	1	1	1	2	1	1	2	1	2	1	2	1	2	1
GSM150995	1	1	4	4	4	2	1	1	1	1	2	1	1	1	1	1	1	2	4	4	2	1	1	1	1
GSM150996	2	2	2	2	2	2	2	2	1	2	2	2	2	2	2	2	2	2	2	2	2	2	2	2	2
GSM150997	1	3	3	3	4	2	1	1	2	1	2	1	1	1	1	1	1	1	4	3	2	1	1	1	1
GSM150998	2	1	2	2	2	2	2	2	2	2	1	2	2	2	2	2	2	2	1	2	2	2	1	1	1
GSM150999	2	2	2	2	2	2	2	2	2	2	2	2	2	2	2	2	2	2	2	2	2	2	2	2	2
GSM151000	1	1	1	1	1	2	1	1	1	2	1	1	1	1	1	1	1	1	1	1	1	1	1	2	1
GSM151001	2	2	2	2	2	2	2	2	2	2	2	2	2	2	2	2	1	2	1	2	2	2	2	2	1
GSM151002	2	2	2	2	2	2	2	2	2	2	1	1	1	1	2	1	1	2	2	2	1	2	1	2	1
GSM151003	1	1	1	1	2	2	1	1	1	1	1	1	1	1	1	1	1	2	1	1	1	1	1	2	1
GSM151004	1	1	2	2	2	2	2	1	1	1	1	1	1	1	1	1	1	2	1	2	1	2	1	2	1
GSM151005	1	1	1	1	1	2	1	1	1	1	1	1	1	1	1	1	1	2	1	1	1	1	1	2	1
GSM151006	1	1	1	1	1	2	1	1	1	1	1	1	1	1	1	1	2	1	1	1	1	1	1	1	1
GSM151007	1	1	1	1	1	2	2	1	1	1	2	1	1	1	1	1	1	2	1	1	2	2	1	2	1
GSM151008	2	3	2	2	2	2	2	2	2	2	2	1	2	1	2	1	2	2	3	2	2	2	1	1	1
GSM151009	1	1	1	1	1	1	1	1	1	2	2	1	1	1	1	1	2	1	1	1	2	1	1	2	1
GSM151010	1	1	1	1	1	2	1	1	1	2	2	1	2	1	1	1	1	1	1	1	2	1	1	2	1
GSM151011	2	1	2	2	2	2	2	2	2	1	1	1	1	2	2	2	2	2	1	2	1	2	1	2	1
GSM151012	5	5	5	5	5	5	5	5	5	5	5	5	5	5	5	5	5	5	5	5	5	5	5	5	5
GSM151013	2	1	2	2	2	2	2	2	2	2	1	2	1	1	2	1	1	2	1	2	1	2	2	2	1
GSM151014	1	1	1	1	1	1	1	1	1	1	1	1	1	1	1	1	1	1	1	1	1	1	1	1	1
GSM151015	3	3	3	3	3	3	3	3	3	3	4	3	3	3	2	3	3	3	4	3	4	3	3	5	3
GSM151016	4	4	4	4	4	4	4	4	4	1	4	1	1	4	4	1	1	2	4	4	4	4	1	4	1
GSM151017	1	1	1	1	2	1	1	1	1	1	1	1	1	1	1	1	1	2	1	1	1	1	1	2	1
GSM151018	1	1	1	1	1	1	1	1	1	1	2	1	1	2	1	1	2	1	1	1	2	1	2	1	1
GSM151019	2	2	2	2	2	2	2	2	2	2	2	2	2	2	2	2	2	2	2	2	2	2	2	2	1
GSM151020	2	2	2	2	2	2	2	2	1	2	2	2	1	1	2	2	2	2	2	2	2	2	2	2	2
GSM151021	1	1	1	1	1	1	1	1	1	1	1	1	1	1	1	1	1	1	1	1	1	1	1	1	1
GSM151022	2	1	2	2	2	2	2	2	1	2	1	2	1	1	2	2	2	2	1	1	1	2	2	2	1
GSM151023	2	1	2	2	2	2	2	1	2	1	1	2	1	2	1	2	2	2	2	2	1	2	2	2	2
GSM151024	1	1	1	1	1	1	1	1	1	2	1	1	1	1	1	1	1	1	1	1	1	1	1	1	1
GSM151025	1	1	1	1	1	1	1	1	1	2	1	1	1	2	1	1	2	1	1	1	1	1	1	2	1
GSM151026	2	2	2	2	2	2	2	2	2	2	2	2	2	2	2	2	2	2	2	2	2	2	2	2	2
GSM151027	1	4	4	4	1	1	1	1	1	1	1	1	1	1	1	1	1	1	1	4	1	1	1	4	1
GSM151028	1	1	1	1	1	1	1	1	1	1	1	1	1	2	2	1	1	1	1	1	1	1	1	2	1
GSM151029	2	2	2	2	2	2	2	2	2	2	1	2	1	2	2	2	2	2	2	2	1	2	1	2	2
GSM151030	3	3	3	3	2	3	3	3	3	2	3	3	5	3	3	3	3	3	3	3	3	3	3	3	3
GSM151031	2	2	2	2	2	2	2	2	2	2	2	2	2	2	2	2	2	2	2	2	2	2	2	2	2
GSM151032	INC	1	4	4	4	2	3	3	4	1	4	5	3	1	2	3	3	3	3	4	4	3	1	3	3
GSM151033	1	1	1	1	1	1	1	1	1	1	1	1	1	1	1	1	1	1	1	1	1	1	1	4	1
GSM151034	1	4	4	4	4	1	1	1	1	1	1	1	1	1	1	1	1	1	1	4	1	1	1	1	1
GSM151035	1	1	1	1	1	1	1	1	1	1	1	1	1	1	1	1	1	1	1	1	1	1	1	1	1
GSM151036	1	1	1	1	1	1	1	1	1	2	1	2	1	1	1	1	1	1	1	1	1	1	1	2	1
GSM151037	2	2	2	2	2	2	2	2	2	2	2	2	2	2	2	2	2	2	2	2	2	2	2	2	2
GSM151038	2	2	2	2	2	2	2	2	2	2	2	2	2	2	2	2	2	2	2	2	2	2	2	1	2
GSM151039	2	2	2	2	2	2	2	2	2	1	2	2	2	1	2	2	2	2	2	2	2	2	2	2	1
GSM151040	INC	3	3	3	5	5	3	3	4	3	5	5	5	3	5	5	5	5	4	3	5	3	3	5	3
GSM151041	1	1	1	1	1	1	1	1	1	2	1	1	1	1	1	1	1	2	1	1	1	1	1	1	1
GSM151042	2	2	2	2	2	2	2	2	2	2	2	2	2	2	2	2	2	2	2	2	2	2	2	1	1
GSM151043	INC	1	1	1	2	2	2	1	2	2	2	2	1	1	1	1	1	2	2	1	2	2	1	2	1
GSM151044	1	1	1	1	1	1	1	1	1	1	1	1	1	1	1	1	1	1	1	1	1	1	1	1	1
GSM151045	3	3	3	3	3	2	3	3	3	2	5	3	3	3	3	3	3	3	3	3	5	3	3	5	3
GSM151046	3	3	3	3	5	3	3	3	3	3	1	3	3	3	5	3	5	3	4	3	1	3	3	5	3
GSM151047	1	1	1	1	1	1	1	1	1	1	1	1	1	1	1	1	1	1	1	1	1	1	1	1	1
GSM151048	1	1	1	1	1	1	1	1	1	1	1	1	1	1	1	1	1	1	1	1	1	1	1	1	1
GSM151049	3	3	3	3	3	3	3	3	3	3	3	3	3	3	2	3	1	3	3	3	3	3	3	3	3
GSM151050	2	1	2	2	2	2	2	1	1	1	1	1	1	2	2	2	2	2	2	2	1	2	1	2	1
GSM151051	4	4	4	4	4	4	4	4	4	1	4	3	3	4	4	3	5	4	4	4	4	4	1	3	3
GSM151052	2	1	2	2	2	2	1	1	1	2	2	2	1	2	1	2	2	2	2	2	2	1	1	2	1
GSM151053	1	1	1	1	1	1	1	1	1	1	1	1	1	1	1	1	1	1	1	1	1	1	1	1	1
GSM151054	1	1	1	1	1	1	1	1	1	1	1	1	1	1	1	1	1	2	1	1	1	1	1	2	1
GSM151055	1	1	1	1	1	1	1	1	1	2	2	1	1	2	1	1	2	1	1	1	2	1	1	1	1
GSM151056	2	2	2	2	2	1	2	1	2	2	2	2	1	2	1	1	2	2	2	2	2	2	2	2	2
GSM151057	2	2	2	2	2	2	2	2	1	2	2	2	1	2	2	2	2	2	2	2	2	2	2	2	1
GSM151058	1	4	4	4	4	1	1	1	1	1	1	1	1	1	1	1	1	1	1	4	1	1	1	1	1
GSM151059	1	1	1	1	1	1	1	1	1	1	1	1	1	1	1	1	1	2	1	1	1	1	1	2	1
GSM151060	1	1	1	1	1	1	1	1	1	1	1	1	1	1	1	1	1	2	1	1	1	1	1	2	1
GSM151061	3	3	3	3	3	3	3	3	2	2	3	3	3	3	3	3	3	3	3	3	3	3	3	5	3
GSM151062	1	1	1	1	2	1	1	1	1	1	1	1	1	1	1	1	1	2	1	1	1	1	1	2	1
GSM151063	1	1	1	1	4	1	1	1	1	1	1	1	1	1	1	1	1	2	1	1	1	1	1	2	1
GSM151064	2	2	2	2	2	2	2	2	2	2	2	2	2	2	2	2	2	2	2	2	2	2	2	1	2
GSM151065	2	2	2	2	2	1	2	2	1	2	1	2	1	2	2	2	2	1	1	2	1	2	1	1	1
GSM151066	2	2	2	2	2	2	2	2	2	2	2	2	1	1	2	2	2	2	2	2	2	2	1	2	2
GSM151067	2	2	2	2	2	2	2	2	2	1	2	2	1	2	2	1	2	1	3	2	2	2	2	2	1
GSM151068	1	1	1	1	1	1	1	1	2	2	1	1	1	1	1	1	1	2	1	1	1	1	1	2	1
GSM177885	3	3	3	3	3	2	2	3	3	2	4	5	3	3	2	3	5	3	4	3	4	2	3	5	3
GSM177886	2	2	2	2	2	2	2	2	2	2	2	2	2	2	2	2	2	2	2	2	2	2	2	2	2
GSM177887	5	5	5	5	5	5	5	5	5	5	4	5	5	5	5	5	5	5	4	5	4	5	5	5	5
GSM177888	2	2	2	2	2	2	2	2	2	2	2	2	2	2	2	2	2	2	2	2	2	2	2	2	2
GSM177889	2	2	2	2	2	2	2	2	2	2	2	2	2	2	2	2	2	1	2	2	2	2	2	1	1
GSM177890	1	1	4	4	4	1	1	1	4	2	2	1	1	1	1	1	1	2	4	4	2	1	1	1	1
GSM177891	5	5	5	5	5	5	5	5	5	5	5	5	5	5	5	5	5	5	5	5	5	5	5	5	5
GSM177892	1	1	1	1	1	1	1	1	1	1	1	1	1	1	1	1	1	2	1	1	1	1	1	1	1
GSM177893	2	2	2	2	2	2	2	2	2	1	1	2	2	2	2	2	2	2	2	2	1	2	2	2	1
GSM177894	1	1	4	4	4	2	1	1	2	2	1	1	1	1	1	1	1	1	1	4	1	1	1	1	1
GSM177895	2	2	2	2	2	2	2	2	2	2	2	2	2	2	2	2	1	2	2	2	2	2	2	2	2
GSM177896	1	1	1	1	2	2	1	1	1	1	1	1	1	1	1	1	1	1	1	1	1	1	1	1	1
GSM177897	5	5	5	5	5	5	5	5	5	5	5	5	5	5	5	5	5	5	5	5	5	5	5	5	5
GSM177898	INC	4	4	4	4	2	1	1	3	1	4	3	3	1	1	3	5	3	4	4	4	1	3	5	3
GSM177899	3	3	3	3	4	5	3	3	3	1	3	5	3	5	5	3	5	3	3	3	3	3	3	5	5
GSM177900	2	2	2	2	2	2	2	2	2	2	1	2	2	2	2	2	1	2	1	2	1	2	2	2	1
GSM177901	INC	3	3	3	4	2	2	2	2	2	2	2	2	1	2	3	1	5	4	3	2	2	3	2	1
GSM177902	3	3	3	3	3	2	2	3	3	2	3	3	2	2	2	3	3	3	3	3	3	2	2	3	3
GSM177903	3	3	3	3	3	3	3	3	3	2	4	3	2	3	2	3	3	3	3	3	4	3	3	3	5
GSM177904	1	1	1	1	2	2	1	1	1	2	1	1	2	1	1	2	1	1	1	1	1	1	1	1	1
GSM177905	1	1	1	1	2	2	1	1	1	1	2	1	1	1	1	1	1	1	1	1	2	1	1	1	1
GSM177906	5	5	5	5	5	5	5	5	5	2	5	5	5	5	5	5	5	5	5	5	5	5	5	5	5
GSM177907	1	1	4	4	4	1	1	1	1	1	1	1	1	1	1	1	1	1	1	4	1	1	1	1	1
GSM177908	2	2	2	2	2	2	2	2	2	2	2	2	2	2	2	2	2	2	2	2	2	2	2	2	2
GSM177909	5	5	5	5	5	5	5	5	5	2	5	5	5	5	5	5	5	5	5	5	5	5	5	5	5
GSM177910	2	2	2	2	2	2	2	1	1	1	2	2	1	2	2	2	2	2	2	2	1	2	2	1	1
GSM177911	1	1	1	1	1	1	1	1	1	1	1	1	1	1	1	1	1	1	1	1	1	1	1	1	1
GSM177913	5	5	5	5	5	5	5	5	5	5	5	5	5	5	5	5	5	5	5	5	5	5	5	5	5
GSM177914	1	1	1	1	1	1	1	1	1	1	1	1	1	1	1	1	1	1	1	1	1	1	1	1	1
GSM177915	2	2	2	2	2	2	2	2	2	1	2	2	2	2	2	2	2	1	2	2	2	2	2	1	1
GSM177916	2	2	2	2	2	2	2	2	2	2	2	2	2	2	2	2	2	2	2	2	2	2	2	2	1
GSM177917	2	2	2	2	2	2	2	2	1	2	1	2	1	2	2	1	2	2	2	2	1	2	2	2	1
GSM177918	3	3	3	3	3	3	3	3	3	1	4	3	1	3	3	3	5	3	3	3	4	3	1	3	3
GSM177919	1	1	1	1	1	2	1	1	1	1	1	1	1	1	1	1	1	2	1	1	1	1	1	2	1
GSM177920	2	2	2	2	2	2	2	2	2	2	2	2	2	2	2	2	2	2	2	2	2	2	2	1	2
GSM177921	1	1	1	1	1	1	1	1	1	1	1	1	1	1	1	1	1	2	1	1	1	1	1	2	1
GSM177922	1	1	1	1	1	1	1	1	1	1	1	1	1	1	1	1	1	1	1	1	1	1	1	2	1
GSM177923	5	5	5	5	5	5	5	5	5	5	5	5	5	5	5	5	5	5	5	5	5	5	5	5	5
GSM177924	1	1	1	1	1	2	1	1	1	1	1	1	1	1	2	1	2	2	1	1	1	1	1	2	1
GSM177925	5	5	5	5	5	5	5	5	5	3	5	5	5	5	5	5	5	5	5	5	5	5	5	5	5
GSM177926	2	2	2	2	2	2	2	2	2	2	2	2	2	2	2	2	2	2	2	2	2	2	2	2	2
GSM177927	3	3	3	3	3	3	3	3	3	2	3	3	3	3	3	3	3	3	3	3	3	3	3	5	3
GSM177928	1	1	1	1	1	2	1	1	1	2	1	1	1	1	1	1	2	2	1	1	1	1	1	1	1
GSM177929	2	2	2	2	2	2	2	2	2	2	2	2	2	2	2	2	2	3	2	2	2	2	2	2	2
GSM177930	1	1	1	1	1	1	1	1	1	1	1	1	1	1	1	1	1	1	1	1	1	1	1	1	1
GSM177931	1	1	1	1	1	1	1	1	1	2	1	1	1	1	1	1	1	1	1	1	1	1	1	4	1
GSM177932	1	1	1	1	4	1	1	1	1	1	2	1	1	1	1	1	1	2	4	1	2	1	1	2	1
GSM177933	2	2	2	2	2	2	2	2	2	2	2	2	2	2	2	2	2	1	2	2	2	2	2	2	1
GSM177934	2	2	2	2	2	2	2	2	2	2	2	2	2	2	2	2	2	2	2	2	2	2	2	2	2
GSM177935	5	5	5	5	5	5	5	5	5	3	3	5	5	5	5	5	5	5	4	5	3	5	5	5	5
GSM177936	1	1	1	1	1	1	1	1	1	1	1	1	1	1	1	1	1	2	1	1	1	1	1	2	1
GSM177937	5	5	5	5	5	5	5	5	5	2	3	5	5	5	5	5	3	3	3	5	3	5	5	5	5
GSM177938	1	4	4	4	4	1	1	1	1	1	4	1	1	1	1	1	1	1	4	4	4	1	1	1	1
GSM177939	3	3	3	3	3	3	3	3	3	2	3	3	3	3	2	3	5	3	3	3	3	3	3	5	3
GSM177940	1	1	1	1	2	2	1	2	1	2	1	1	1	1	2	1	2	1	1	1	1	1	1	1	1
GSM177941	1	1	1	1	1	1	1	1	2	2	1	1	1	1	1	1	1	2	1	1	1	1	1	2	1
GSM177942	2	2	2	2	2	2	2	2	2	2	2	2	2	2	2	2	2	2	2	2	2	2	2	2	2
GSM177943	5	5	5	5	5	5	5	5	5	5	5	5	5	5	5	5	5	5	5	5	5	5	5	5	5
GSM177944	5	3	5	5	5	5	5	5	3	2	5	5	5	5	5	5	3	5	5	5	5	5	5	5	5
GSM177945	2	2	2	2	2	2	2	2	1	2	1	2	1	1	2	1	1	2	2	2	1	2	2	2	1
GSM177946	2	2	2	2	2	2	2	2	2	2	2	2	2	2	2	2	2	2	2	2	2	2	2	2	2
GSM177947	1	1	1	1	2	2	1	1	1	1	2	2	2	2	1	1	1	2	1	1	2	1	1	1	1
GSM177948	1	1	1	1	1	2	1	1	1	1	2	1	2	1	1	1	1	2	2	1	2	1	1	1	1
GSM177950	2	1	2	2	2	2	2	2	1	2	1	1	2	2	2	2	2	1	2	2	1	2	1	2	1
GSM177952	1	1	1	1	2	2	2	2	1	2	1	2	1	1	2	2	2	1	2	1	1	2	1	1	1
GSM177953	2	2	2	2	2	2	2	2	1	1	2	2	2	2	2	2	2	2	2	2	2	2	2	1	1
GSM177954	5	5	5	5	5	5	5	5	5	5	5	5	5	5	5	5	5	5	5	5	5	5	5	5	5
GSM177955	1	1	1	1	2	1	1	1	1	1	1	1	1	1	1	1	1	1	1	1	1	1	1	2	1
GSM177956	5	3	5	5	5	5	5	5	5	2	5	5	5	5	5	5	3	5	5	5	5	5	5	5	5
GSM177957	1	1	4	4	2	2	2	1	1	1	2	1	2	1	2	1	1	1	1	4	2	2	1	1	1
GSM177958	2	2	2	2	2	2	2	2	2	2	2	2	2	2	2	2	2	2	2	2	2	2	2	2	2
GSM177959	3	3	3	3	3	2	2	5	3	2	3	3	3	3	2	3	5	3	4	3	3	2	3	5	3
GSM177960	2	2	2	2	2	2	2	2	2	2	1	2	2	2	2	2	2	2	2	2	1	2	2	2	2
GSM177961	1	1	1	1	4	1	1	1	1	1	2	1	1	1	1	1	1	1	1	1	2	1	1	1	1
GSM177963	5	5	4	4	5	5	5	5	5	5	5	5	5	5	5	5	5	5	5	5	5	5	5	5	5
GSM177965	1	1	1	1	1	1	1	1	1	1	1	1	1	1	1	1	1	2	1	1	1	1	1	2	1
GSM177966	5	5	5	5	5	5	5	5	5	5	5	5	5	5	5	5	5	5	5	5	5	5	5	5	5
GSM177967	1	1	1	1	1	1	1	1	1	1	1	1	1	1	1	1	1	1	1	1	1	1	1	2	1
GSM177968	INC	5	4	4	4	5	2	5	2	2	4	2	2	3	2	1	1	5	5	4	4	2	1	2	1
GSM177969	1	1	1	1	1	1	1	1	1	2	1	1	1	1	1	1	1	2	1	1	1	1	1	2	1
GSM177970	5	5	5	5	5	5	5	5	5	5	5	5	5	5	5	5	5	5	5	5	5	5	5	5	5
GSM177971	2	2	2	2	2	2	2	2	2	1	1	2	2	2	2	2	2	2	1	2	1	2	2	2	1
GSM177972	1	4	4	4	4	4	1	1	1	1	2	1	1	1	1	1	1	1	4	4	2	1	1	2	1
GSM177973	2	2	2	2	2	2	2	2	2	1	2	2	2	2	2	2	2	2	2	2	2	2	2	2	2
GSM177974	2	2	2	2	2	2	2	2	1	2	2	1	1	1	2	1	1	2	1	2	2	2	1	2	1
GSM177975	5	5	5	5	5	5	5	5	5	5	5	5	5	5	5	5	5	5	5	5	5	5	5	3	5
GSM177976	1	1	4	4	4	2	1	1	1	1	4	1	1	1	1	1	1	1	1	4	4	1	1	1	1
GSM177977	3	3	3	3	3	3	3	5	3	2	5	3	3	3	2	3	3	3	3	3	5	3	3	5	3
GSM177978	5	5	5	5	5	5	5	5	5	2	5	5	5	5	5	5	5	5	5	5	5	5	5	3	5
GSM177979	3	3	3	3	3	5	3	3	3	3	3	5	3	5	5	5	5	3	3	3	3	3	3	3	5
GSM177980	5	5	5	5	5	5	5	5	5	2	5	5	5	5	5	5	5	5	5	5	5	5	5	3	5
GSM177981	2	2	2	2	2	2	2	2	2	2	2	2	2	2	2	2	2	2	2	2	2	2	2	2	2
GSM177982	1	1	4	4	4	2	1	1	4	2	1	1	2	1	1	2	1	1	1	4	1	1	1	1	1
GSM177983	2	2	2	2	2	2	2	2	2	2	2	2	2	2	2	2	2	2	2	2	2	2	2	2	2
GSM177984	1	1	1	1	1	1	1	1	1	1	2	1	1	1	1	1	1	1	1	1	2	1	1	1	1
GSM177985	5	5	5	5	5	5	5	5	5	5	4	5	5	5	5	5	5	5	3	5	4	5	5	5	5
GSM177986	2	3	3	3	2	2	2	2	3	2	2	2	2	2	2	2	5	2	1	3	2	2	2	1	2
GSM177988	INC	2	4	4	4	2	3	3	4	2	4	5	3	2	2	3	3	3	3	4	4	3	3	5	5
GSM177989	1	1	1	1	1	2	1	1	1	1	1	1	1	1	1	1	1	2	1	1	1	1	1	1	1
GSM177990	2	2	2	2	2	2	2	2	2	1	1	2	1	2	2	2	2	2	2	2	1	2	2	2	1
GSM177991	4	4	4	4	4	4	4	4	4	1	4	4	1	1	4	4	1	1	1	4	4	4	1	1	1
GSM177992	1	1	1	1	1	1	1	1	1	1	1	1	1	1	1	1	1	2	1	1	1	1	1	2	1
GSM177993	5	5	5	5	5	5	5	5	4	1	4	5	5	5	5	4	5	5	4	5	4	5	5	5	5
GSM177995	2	2	2	2	2	2	2	2	2	2	1	2	1	2	2	1	2	2	2	2	1	2	1	2	1
GSM177996	1	1	1	1	1	1	1	1	1	1	1	1	1	1	1	1	1	1	1	1	1	1	1	1	1
GSM177997	1	1	2	2	1	1	1	2	2	2	1	2	1	1	1	1	2	1	1	2	1	1	1	1	1
GSM177998	1	1	2	2	1	2	2	1	1	1	1	2	1	1	1	1	2	2	1	2	1	2	1	1	1
GSM177999	5	5	5	5	5	5	5	5	5	3	5	5	5	5	5	5	5	5	5	5	5	5	5	5	5
GSM178000	1	1	1	1	2	2	2	1	1	2	1	1	1	1	1	1	1	1	1	1	1	2	1	1	1
GSM178001	5	5	5	5	5	5	5	5	5	5	5	5	5	5	5	5	5	5	5	5	5	5	5	5	5
GSM178002	1	1	1	1	1	1	1	1	1	1	2	1	1	1	1	1	1	2	1	1	2	1	1	1	1
GSM178003	5	5	4	4	5	5	5	5	5	2	4	5	5	5	5	5	5	5	4	4	4	5	5	5	5
GSM178004	2	2	4	4	2	2	2	2	1	2	2	2	2	1	1	2	1	2	3	4	2	2	2	2	1
GSM178005	2	2	2	2	2	2	2	2	2	2	2	2	2	2	2	2	2	2	2	2	2	2	2	1	1
GSM178006	3	3	3	3	3	5	3	3	3	3	3	5	3	3	3	3	3	3	4	3	3	3	5	5	5
GSM178007	1	1	1	1	2	2	1	1	1	2	1	1	1	1	1	1	1	1	1	1	1	1	1	1	1
GSM178008	2	2	2	2	2	2	2	2	2	2	1	2	1	1	2	1	1	2	2	2	1	2	2	2	2
GSM178009	3	3	3	3	4	3	3	3	3	2	3	5	3	3	5	5	3	3	3	3	3	3	2	5	5
GSM178010	3	3	3	3	3	2	2	3	3	2	3	3	3	2	2	3	3	3	3	3	3	2	2	5	3
GSM178011	INC	5	4	4	5	5	4	4	4	4	5	5	5	4	5	4	5	5	5	4	5	4	4	3	5
GSM178012	5	5	5	5	5	5	5	5	5	5	5	5	5	5	5	5	5	5	5	5	5	5	5	5	5
GSM178013	5	5	5	5	5	5	5	5	5	5	5	5	5	5	5	5	5	5	5	5	5	5	5	5	5
GSM178014	2	2	2	2	2	2	2	2	1	1	1	2	1	2	2	2	2	2	1	2	1	2	2	1	2
GSM178015	1	1	1	1	1	1	1	1	1	1	2	1	1	1	1	1	1	1	1	1	2	1	1	1	1
GSM178016	1	1	1	1	1	1	1	1	1	2	1	1	1	1	1	1	1	1	1	1	1	1	1	1	1
GSM178017	2	3	3	3	3	2	2	3	3	2	2	2	2	2	2	2	2	2	2	3	2	2	2	2	2
GSM178018	2	2	2	2	2	2	2	2	2	2	1	2	1	2	2	2	2	2	2	2	1	2	1	2	1
GSM178019	1	1	1	1	1	1	1	1	1	1	1	1	1	1	1	1	1	1	1	1	1	1	1	1	1
GSM178020	2	2	3	3	2	2	2	2	2	2	2	2	2	2	2	2	2	2	2	3	2	2	2	2	2
GSM178021	5	5	5	5	4	2	5	5	5	2	4	2	2	5	2	5	5	5	1	5	4	5	5	1	2
GSM178022	1	1	1	1	1	1	1	1	1	1	1	1	1	1	1	2	1	1	1	1	1	1	1	2	1
GSM178024	1	4	4	4	4	4	1	1	4	1	4	1	1	1	1	1	1	4	4	4	4	1	1	1	1
GSM178025	2	2	2	2	2	2	2	2	2	2	2	2	2	2	2	2	2	2	2	2	2	2	2	2	2
GSM178026	2	2	2	2	2	2	2	2	1	2	2	2	1	2	2	2	2	2	1	2	2	2	1	2	1
GSM178027	1	1	1	1	2	2	2	1	1	1	1	1	1	1	1	1	1	1	1	1	1	2	1	1	1
GSM178028	3	3	3	3	4	4	3	3	3	3	5	3	5	3	5	5	5	5	4	3	5	3	3	5	3
GSM178029	1	4	4	4	4	2	1	1	1	1	1	1	1	1	1	1	1	1	1	4	1	1	1	1	1
GSM178030	1	1	1	1	1	2	1	1	1	2	2	1	1	1	1	1	1	2	1	1	2	1	1	2	1
GSM178031	2	2	2	2	2	2	2	2	2	2	1	2	1	2	2	2	2	2	2	2	1	2	1	2	1
GSM178032	1	1	1	1	1	1	1	1	1	1	1	1	1	1	1	1	1	1	1	1	1	1	1	1	1
GSM178034	5	5	5	5	5	5	5	5	5	5	5	5	5	5	5	5	5	5	5	5	5	5	5	5	5
GSM178035	5	5	5	5	5	5	5	5	5	5	5	5	5	5	5	5	5	5	5	5	5	5	5	5	5
GSM178036	1	1	1	1	1	2	1	1	1	2	1	1	1	1	1	1	1	1	1	1	1	1	1	1	1
GSM178037	2	1	2	2	2	1	2	2	1	2	1	1	1	2	2	2	2	1	2	2	1	2	2	2	1
GSM178038	2	2	2	2	2	2	2	2	1	1	2	2	2	2	2	2	2	2	2	2	2	2	2	1	2
GSM178039	1	1	1	1	1	1	1	1	1	1	1	1	1	1	1	1	1	1	1	1	1	1	1	1	1
GSM178040	1	1	1	1	1	1	1	1	1	1	1	1	1	1	1	1	1	1	1	1	1	1	1	2	1
GSM178041	1	1	1	1	1	1	1	1	1	1	1	1	1	1	1	1	1	2	1	1	1	1	1	1	1
GSM178042	1	1	1	1	1	2	1	1	1	2	1	2	1	1	1	1	1	2	1	1	1	1	1	2	1
GSM178043	1	1	1	1	4	1	1	1	1	1	1	1	1	1	1	1	1	5	1	1	1	1	1	1	1
GSM178044	1	1	1	1	1	1	1	1	1	2	1	1	1	1	1	1	1	1	1	1	1	1	1	2	1
GSM178045	1	1	1	1	1	1	1	1	1	2	1	1	1	1	1	1	1	1	1	1	1	1	1	2	1
GSM178046	2	2	2	2	2	2	2	2	2	2	1	2	1	2	2	2	2	2	2	2	1	2	2	2	1
GSM178047	1	1	1	1	1	1	1	1	1	2	1	1	1	1	1	1	1	1	1	1	1	1	1	2	1
GSM178049	1	1	1	1	2	2	2	1	2	2	1	1	1	2	1	1	1	2	1	1	1	2	1	2	1
GSM178050	2	2	2	2	2	2	2	2	2	2	2	2	2	2	2	2	2	2	2	2	2	2	2	2	2
GSM178051	1	4	4	4	4	4	1	1	1	1	1	1	1	1	1	1	1	4	1	4	1	1	1	1	1
GSM178052	3	3	3	3	3	2	3	3	3	3	1	3	3	3	2	3	3	3	3	3	1	3	1	5	3
GSM178053	2	2	2	2	2	2	2	2	2	2	2	2	2	2	2	2	2	2	2	2	2	2	3	1	1
GSM178054	1	1	1	1	1	1	1	1	1	1	1	1	1	1	1	1	1	1	1	1	1	1	1	1	1
GSM178055	5	5	5	5	5	5	5	5	5	2	3	5	5	5	5	5	3	3	3	5	3	5	5	3	5
GSM178056	2	2	2	2	2	2	2	2	2	2	2	2	2	2	2	2	2	2	2	2	2	2	2	1	1
GSM178057	2	2	2	2	2	2	2	2	2	2	1	2	2	2	2	2	2	2	2	2	1	2	2	2	1
GSM178058	2	2	2	2	2	2	2	2	2	2	2	2	2	2	2	2	2	3	3	2	2	2	3	5	2
GSM178059	5	5	5	5	5	5	5	5	5	2	5	5	5	5	5	5	3	5	5	5	5	5	5	5	5
GSM178060	2	2	2	2	2	2	2	2	2	2	2	2	2	2	2	2	2	2	2	2	2	2	2	2	2
GSM178061	2	2	1	1	2	2	2	2	2	2	2	2	2	2	2	1	1	2	1	1	2	2	1	2	1
GSM178062	1	1	1	1	4	1	1	1	2	1	1	1	1	1	1	1	1	1	3	1	1	1	1	2	1
GSM178063	3	3	3	3	3	5	2	3	3	3	3	3	5	5	5	3	3	3	3	3	3	2	3	5	3
GSM178064	2	2	2	2	2	2	2	2	2	2	2	2	2	1	2	2	2	2	2	2	2	2	2	2	1
GSM178065	3	3	3	3	3	3	3	3	3	2	5	3	3	3	2	3	3	3	3	3	5	3	3	5	3
GSM178066	3	3	3	3	3	2	2	3	3	2	1	3	3	2	2	3	5	3	3	3	1	2	1	5	3
GSM178068	2	2	2	2	2	2	2	2	2	2	2	2	2	2	2	2	2	2	2	2	2	2	2	2	2
GSM178069	2	2	2	2	2	2	2	2	2	2	2	2	2	2	2	2	2	2	2	2	2	2	2	2	2
GSM178070	2	1	2	2	1	2	1	1	1	2	2	2	2	2	1	2	2	2	1	2	1	1	1	2	1
GSM178071	1	1	1	1	2	2	1	1	1	1	1	1	1	1	1	1	1	1	1	1	1	1	1	2	1
GSM178072	2	1	1	1	2	2	2	2	2	2	2	2	2	2	2	1	1	2	1	1	2	2	1	1	1
GSM178073	3	3	3	3	3	3	3	5	5	2	3	3	3	3	2	3	3	3	3	3	3	3	3	5	3
GSM178074	2	2	2	2	2	2	2	2	2	2	2	2	2	2	2	2	2	2	2	2	2	2	2	1	1
GSM178075	5	5	5	5	5	5	5	5	5	2	5	5	5	5	5	5	3	5	5	5	5	5	5	3	5
GSM178076	1	1	1	1	2	2	1	1	1	1	1	1	1	2	1	1	1	5	1	1	1	1	1	1	1
GSM178077	1	1	1	1	2	2	2	1	1	1	2	1	1	1	2	1	1	2	1	1	2	2	1	1	1
GSM178078	5	5	5	5	5	5	5	5	5	5	5	5	5	5	5	5	5	5	5	5	5	5	5	5	5
GSM178079	5	5	5	5	5	5	5	5	5	5	5	5	5	5	5	5	5	5	5	5	5	5	5	5	5
GSM178080	2	2	2	2	2	2	2	2	2	2	2	2	1	2	2	2	2	2	2	2	2	2	2	2	1
GSM178081	1	1	4	4	4	1	1	1	1	1	1	1	1	1	1	1	1	5	1	4	1	1	1	1	1
GSM178082	5	5	5	5	5	5	5	5	5	1	4	5	5	5	5	5	5	4	4	5	4	5	5	5	5
GSM26804	2	2	2	2	2	2	2	2	2	2	2	2	2	2	2	2	2	2	2	2	2	2	2	2	2
GSM26867	2	2	2	2	2	2	2	2	2	2	2	2	2	2	2	2	2	2	2	2	2	2	2	2	2
GSM26868	2	2	2	2	2	2	2	2	2	2	1	2	2	2	2	2	2	2	2	2	1	2	2	2	2
GSM26869	1	1	1	1	1	1	1	1	1	2	1	1	1	1	1	1	1	1	1	1	1	1	1	2	1
GSM26871	5	5	5	5	5	5	5	5	5	5	5	5	5	5	5	5	5	5	5	5	5	5	5	5	5
GSM26872	2	2	2	2	2	2	2	2	1	1	1	2	1	2	2	1	2	2	2	2	1	2	1	2	2
GSM26873	1	1	2	2	2	2	2	2	1	2	1	1	1	1	1	1	1	2	1	2	1	2	1	1	1
GSM26874	1	2	1	1	1	1	1	1	1	2	1	1	1	2	2	2	2	2	1	1	1	1	1	2	1
GSM26875	2	2	2	2	2	2	2	2	2	2	2	2	2	2	2	2	2	2	2	2	2	2	2	2	2
GSM26876	2	2	1	1	2	2	2	2	1	2	1	1	2	2	2	2	1	2	1	1	1	2	2	2	1
GSM26877	2	2	2	2	2	2	2	1	2	1	1	2	1	1	1	2	2	2	2	2	1	2	1	1	1
GSM26878	3	3	3	3	3	2	2	3	3	2	1	3	3	3	2	3	3	3	3	3	1	2	3	3	3
GSM26879	2	2	2	2	2	2	2	2	2	2	2	2	2	2	2	2	2	2	2	2	2	2	2	2	2
GSM26880	INC	3	3	3	5	2	2	3	3	3	1	3	5	3	5	5	5	5	4	3	1	2	3	3	5
GSM26881	2	2	2	2	2	2	2	2	2	2	2	2	2	2	2	2	1	2	2	2	2	2	2	2	2
GSM26882	5	5	4	4	5	5	5	5	5	1	5	5	5	5	5	5	5	5	5	4	5	5	5	5	5
GSM26883	3	3	3	3	2	2	3	3	2	2	1	3	3	3	3	3	3	3	3	3	1	3	3	3	3
GSM26884	5	5	5	5	5	5	5	5	5	5	5	5	5	5	5	5	5	5	5	5	5	5	5	5	5
GSM26885	1	1	1	1	1	1	1	1	1	1	1	1	1	1	1	1	1	1	1	1	1	1	1	1	1
GSM26887	INC	3	3	3	3	2	2	3	3	2	5	2	2	2	2	2	5	2	1	3	5	2	3	2	2
GSM26888	5	5	4	4	5	5	5	5	5	1	5	5	5	5	5	5	5	5	5	4	5	5	5	5	5
GSM26889	5	5	4	4	5	5	5	5	5	5	5	5	5	5	5	5	5	5	5	4	5	5	5	5	5
GSM26890	2	2	2	2	2	2	2	2	2	2	2	2	2	2	2	2	2	3	2	2	2	2	2	2	1
GSM26891	2	2	2	2	2	2	2	2	2	2	1	2	2	2	2	2	2	2	2	2	1	2	2	2	2
GSM26892	INC	5	4	4	5	2	5	5	5	2	5	2	5	2	5	2	1	5	1	4	5	5	5	2	1
GSM26893	5	5	5	5	5	5	5	5	5	2	5	5	5	5	5	5	5	5	5	5	5	5	5	5	5
GSM26894	2	2	2	2	2	2	2	2	2	2	2	2	2	2	2	2	1	3	2	2	2	2	2	2	2
GSM26895	5	5	5	5	5	5	5	5	5	3	5	5	5	5	5	5	5	5	5	5	5	5	5	3	5
GSM26896	INC	4	4	4	4	2	2	1	1	1	1	1	2	1	2	1	1	2	1	4	1	2	1	2	1
GSM26897	2	2	2	2	2	2	2	2	2	1	2	2	1	2	2	2	2	2	2	2	2	2	2	1	1
GSM26898	5	5	5	5	5	5	5	5	5	5	5	5	5	5	5	5	5	5	5	5	5	5	5	5	5
GSM26900	3	3	3	3	5	2	2	3	3	3	1	3	3	5	5	5	3	3	3	3	1	2	1	5	3
GSM26901	2	2	2	2	2	2	2	2	2	2	2	2	2	2	2	2	2	2	2	2	2	2	2	2	2
GSM26902	5	5	5	5	5	5	5	5	5	5	5	5	5	5	5	5	5	5	5	5	5	5	5	3	5
GSM26903	3	3	3	3	3	2	2	3	3	1	4	3	3	3	2	3	3	3	3	3	4	2	3	3	3
GSM26904	2	2	2	2	2	2	2	2	2	2	2	2	2	2	2	2	2	2	2	2	2	2	2	2	2
GSM26905	5	5	5	5	5	5	5	5	5	5	5	5	5	5	5	5	5	5	5	5	5	5	5	3	5
GSM26906	5	5	5	5	5	5	5	5	5	2	5	5	5	5	5	5	5	5	5	5	5	5	5	5	5
GSM26907	2	2	2	2	2	2	2	2	2	2	2	2	2	2	2	2	1	2	2	2	2	2	2	2	1
GSM26908	5	5	4	4	5	5	5	5	5	2	3	5	3	5	5	5	3	3	3	4	3	5	2	5	5
GSM26909	INC	2	2	2	2	1	2	1	1	1	1	1	1	1	2	1	2	2	2	2	1	2	1	2	1
GSM26910	3	3	3	3	3	3	3	3	3	2	1	3	3	3	3	3	3	3	3	3	1	3	3	3	3
GSM26911	2	2	2	2	2	2	2	2	2	2	2	2	2	2	2	2	2	2	2	2	2	2	2	2	2
GSM26912	INC	5	4	4	5	5	5	5	5	2	2	2	2	5	5	2	5	5	1	4	2	5	5	2	2
GSM26913	1	1	1	1	1	1	1	1	1	1	1	1	1	1	1	1	1	2	1	1	1	1	1	1	1
GSM26914	2	2	2	2	2	2	2	2	2	2	1	2	2	2	2	2	1	2	1	2	1	2	2	2	1
GSM282373	3	3	3	3	3	3	2	3	3	2	3	3	3	3	2	3	3	3	3	3	3	2	3	3	3
GSM282374	2	2	2	2	2	2	2	2	2	2	1	1	2	2	2	2	2	2	1	2	1	2	2	2	1
GSM282375	1	1	1	1	1	1	1	1	1	1	1	1	1	1	1	1	1	1	1	1	1	1	1	1	1
GSM282376	1	1	1	1	2	1	1	1	2	1	1	1	1	1	1	1	1	2	1	1	1	1	1	2	1
GSM282377	2	2	2	2	2	2	2	2	1	2	2	2	1	2	2	2	2	2	2	2	2	2	2	2	2
GSM282378	2	2	2	2	2	2	2	1	1	2	2	1	1	1	1	1	2	2	1	2	2	2	1	2	1
GSM282379	2	2	2	2	2	2	2	2	2	2	2	2	2	2	2	2	2	2	2	2	2	2	2	2	2
GSM282380	2	2	2	2	2	2	2	2	2	2	2	2	2	2	2	2	2	2	2	2	2	2	2	1	1
GSM282381	1	1	1	1	1	1	1	1	1	1	1	1	1	1	1	1	1	2	1	1	1	1	1	2	1
GSM282382	1	1	1	1	1	1	1	1	1	1	1	1	1	1	1	1	1	1	1	1	1	1	1	1	1
GSM282383	1	1	1	1	1	1	1	1	1	1	1	1	1	1	1	1	1	1	1	1	1	1	1	2	1
GSM282384	1	1	1	1	1	2	1	1	1	2	1	1	1	1	1	1	1	2	1	1	1	1	1	1	1
GSM282385	5	5	5	5	5	5	5	5	5	5	5	5	5	5	5	5	5	5	5	5	5	5	5	5	5
GSM282386	2	2	2	2	2	2	2	2	1	2	1	2	1	2	2	2	2	2	1	2	1	2	2	2	1
GSM282387	1	1	1	1	4	1	1	1	1	1	1	1	1	1	1	1	1	1	1	1	1	1	1	1	1
GSM282388	1	1	1	1	1	1	1	1	1	1	1	1	1	1	1	1	1	2	1	1	1	1	1	2	1
GSM282389	2	2	2	2	2	2	2	2	1	2	1	2	1	2	2	2	2	2	2	2	1	2	1	2	1
GSM282390	1	1	1	1	2	1	1	1	1	1	1	1	1	1	1	1	1	2	1	1	1	1	1	1	1
GSM282391	1	1	1	1	2	2	1	1	1	1	1	1	1	1	1	1	1	1	1	1	1	1	1	1	1
GSM282392	2	2	2	2	2	2	2	2	2	2	2	2	2	2	2	2	2	2	2	2	2	2	2	2	2
GSM282393	1	1	4	4	4	1	1	1	1	1	1	1	1	1	1	1	1	1	1	4	1	1	1	1	1
GSM282394	2	2	2	2	2	2	2	2	1	2	2	2	2	2	2	2	2	2	2	2	2	2	2	2	2
GSM282395	1	1	1	1	2	2	1	1	1	1	1	1	1	1	1	1	1	2	1	1	1	1	1	2	1
GSM282396	2	2	2	2	2	2	2	2	2	2	2	2	2	2	2	2	2	2	2	2	2	2	2	2	2
GSM282397	2	2	2	2	2	2	2	2	2	2	1	1	1	1	2	2	2	2	2	2	1	2	2	2	1
GSM282399	2	2	2	2	2	2	2	2	2	2	2	2	2	2	2	2	2	2	2	2	2	2	2	2	2
GSM282400	1	4	4	4	2	1	2	1	1	1	1	1	1	1	1	1	1	2	4	4	1	2	1	1	1
GSM282401	4	4	4	4	4	4	4	4	4	4	4	4	1	4	4	4	1	4	4	4	4	4	4	4	1
GSM282402	1	1	1	1	1	1	1	1	1	1	1	1	1	1	1	1	1	2	1	1	1	1	1	2	1
GSM282403	2	2	2	2	2	2	2	2	1	2	2	2	2	2	2	2	2	2	2	2	2	2	2	2	1
GSM282404	1	1	1	1	1	1	1	1	1	1	1	1	1	1	1	1	1	2	1	1	1	1	1	2	1
GSM282405	2	1	2	2	2	2	2	1	2	1	1	2	1	2	2	2	2	2	2	2	1	2	2	2	1
GSM282406	1	1	1	1	2	2	2	1	2	2	1	1	2	1	2	1	1	2	1	1	1	2	1	2	1
GSM282407	1	1	1	1	2	1	1	1	1	1	1	1	1	1	1	1	1	2	1	1	1	1	1	2	1
GSM282408	1	1	1	1	1	1	1	1	1	1	1	1	1	1	1	1	1	2	1	1	1	1	1	2	1
GSM282410	3	3	3	3	3	2	2	2	3	3	3	3	2	3	2	3	3	3	3	3	3	2	3	5	3
GSM282411	1	1	1	1	1	1	1	1	1	1	1	1	1	1	1	1	1	1	1	1	1	1	1	1	1
GSM282412	1	1	1	1	1	1	1	1	1	1	2	1	1	1	1	1	1	2	1	1	2	1	1	2	1
GSM282413	5	5	5	5	5	5	5	5	5	5	5	5	5	5	5	5	5	5	5	5	5	5	5	5	5
GSM282414	1	1	1	1	1	1	1	1	2	2	1	1	1	1	1	1	2	2	2	1	1	1	1	2	1
GSM282415	2	2	2	2	2	2	2	2	1	2	1	2	1	2	2	2	2	2	2	2	1	2	2	2	1
GSM282416	1	1	1	1	1	1	1	1	1	2	1	1	1	1	1	1	1	2	1	1	1	1	1	1	1
GSM282417	2	1	2	2	2	2	2	1	1	2	1	1	1	2	2	2	2	2	2	2	1	2	1	1	1
GSM282420	1	4	4	4	4	1	1	1	4	1	1	4	1	1	1	4	1	4	4	4	1	1	1	1	1
GSM282421	1	1	1	1	1	2	1	1	2	2	1	1	1	1	1	1	1	2	1	1	1	1	1	1	1
GSM282422	1	1	1	1	1	1	1	1	1	1	1	1	1	1	1	1	1	2	1	1	1	1	1	2	1
GSM282423	1	1	1	1	1	1	1	1	1	1	1	1	1	1	1	1	1	1	1	1	1	1	1	1	1
GSM282424	2	2	2	2	2	2	2	1	1	1	1	2	1	2	2	2	2	2	2	2	1	2	2	2	1
GSM282425	1	1	1	1	1	1	1	1	1	1	1	1	1	1	1	1	1	2	1	1	1	1	1	2	1
GSM282426	1	1	1	1	2	2	2	1	2	1	1	1	2	1	1	1	1	1	1	1	1	2	1	2	1
GSM282427	5	5	5	5	5	2	5	5	5	2	5	2	5	5	5	5	5	5	1	5	5	5	5	5	1
GSM282428	2	2	2	2	2	2	2	2	2	2	2	2	2	2	2	2	2	2	2	2	2	2	2	2	2
GSM282430	INC	1	1	1	2	2	2	1	2	2	2	2	1	2	1	1	2	1	2	1	2	2	1	1	1
GSM282431	1	1	1	1	1	1	1	1	1	1	1	1	1	1	1	1	1	2	1	1	1	1	1	2	1
GSM282432	1	1	1	1	1	1	1	1	1	1	1	1	1	1	1	1	1	1	1	1	1	1	1	1	1
GSM282433	1	1	1	1	4	1	1	1	1	1	1	1	1	1	1	1	1	2	1	1	1	1	1	1	1
GSM282434	1	4	4	4	4	1	1	1	1	1	1	1	1	1	1	1	1	4	1	4	1	1	4	4	1
GSM282435	5	5	5	5	5	5	5	5	5	5	5	2	5	5	5	5	5	5	5	5	5	5	5	5	1
GSM282436	1	1	4	4	4	1	1	1	1	1	2	1	2	1	1	1	1	2	4	4	2	1	3	2	1
GSM282437	1	1	1	1	2	2	2	1	1	1	1	2	1	1	1	1	2	2	1	1	1	2	1	1	1
GSM282438	1	1	1	1	1	1	1	1	1	1	1	1	1	1	1	1	1	1	1	1	1	1	1	1	1
GSM282439	1	1	1	1	1	1	1	1	1	1	1	1	1	1	1	1	1	2	1	1	1	1	1	2	1
GSM282440	5	5	5	5	5	5	5	5	5	5	5	5	5	5	5	5	5	5	5	5	5	5	5	5	5
GSM282441	1	1	1	1	2	1	1	1	1	1	1	2	1	2	1	1	2	2	2	1	1	1	1	2	1
GSM282442	2	1	2	2	2	2	1	1	1	2	1	2	1	2	2	1	2	2	1	2	1	1	2	2	1
GSM282443	1	1	1	1	1	1	1	1	1	1	1	1	1	1	1	1	1	2	1	1	1	1	1	2	1
GSM282444	1	1	2	2	2	2	1	1	1	1	1	1	1	1	1	1	2	2	1	2	1	1	1	2	1
GSM282445	1	1	4	4	4	1	1	1	1	1	1	1	1	1	1	1	1	1	1	4	1	1	1	1	1
GSM282446	5	5	5	5	5	5	5	5	4	1	4	5	4	5	5	5	5	5	4	5	4	5	5	3	5
GSM282447	1	1	1	1	1	1	1	1	1	1	1	1	1	1	1	1	1	1	1	1	1	1	1	2	1
GSM282448	INC	4	4	4	4	4	4	4	4	1	5	1	3	4	1	1	1	3	4	4	5	4	1	3	1
GSM282449	1	1	1	1	1	1	1	1	1	1	1	1	1	1	1	1	1	1	1	1	1	1	1	1	1
GSM282450	2	2	2	2	2	2	2	2	2	2	2	2	2	2	2	2	2	2	2	2	2	2	2	3	2
GSM282451	1	1	1	1	1	1	1	1	1	1	1	1	1	1	1	1	1	2	1	1	1	1	1	1	1
GSM282452	1	1	1	1	1	1	1	1	2	1	1	1	1	1	1	1	1	2	1	1	1	1	1	2	1
GSM282453	1	4	4	4	4	4	4	4	1	1	1	1	1	1	1	1	1	4	1	4	1	4	1	2	1
GSM282454	5	5	5	5	5	5	5	5	5	5	5	5	5	5	5	5	5	5	5	5	5	5	5	5	5
GSM282455	2	1	1	1	2	2	2	1	2	2	1	1	1	2	2	2	2	2	2	1	1	2	2	2	1
GSM282456	1	1	1	1	1	1	1	1	1	1	1	1	1	1	1	1	1	1	1	1	1	1	1	1	1
GSM282457	3	3	3	3	4	3	2	3	3	2	3	3	3	3	5	3	5	3	4	3	3	2	3	5	3
GSM282458	1	1	1	1	1	1	1	1	1	1	1	1	1	1	1	1	1	1	1	1	1	1	1	1	1
GSM282459	1	4	4	4	1	1	1	1	1	1	1	1	1	1	1	1	1	1	1	4	1	1	1	1	1
GSM282461	2	2	2	2	2	2	2	2	2	2	2	2	2	1	2	2	1	2	2	1	2	2	2	2	1
GSM282462	1	1	1	1	2	1	1	1	1	1	1	1	1	1	1	1	1	2	1	1	1	1	1	1	1
GSM282463	1	1	1	1	1	1	1	1	1	1	1	1	1	1	1	1	1	1	1	1	1	1	1	1	1
GSM282464	5	5	5	5	5	5	5	5	5	5	5	5	5	5	5	5	5	5	5	5	5	5	5	3	5
GSM282465	5	5	5	5	5	5	5	5	5	2	5	5	5	5	5	5	5	5	5	5	5	5	5	5	5
GSM282466	1	1	1	1	1	1	1	1	1	1	1	1	1	1	1	1	1	1	1	1	1	1	1	1	1
GSM282467	INC	4	4	4	4	4	4	4	4	1	1	1	1	1	4	1	1	4	1	4	1	4	1	1	1
GSM282468	2	2	2	2	2	2	2	2	2	2	2	2	2	1	2	2	1	2	2	2	2	2	2	2	1
GSM282469	1	4	4	4	1	1	1	1	1	1	1	1	1	1	1	1	1	2	1	4	1	1	1	1	1
GSM282470	4	4	4	4	4	4	4	4	4	4	4	1	1	4	4	1	1	4	4	4	4	4	1	4	1
GSM282471	5	5	5	5	5	5	5	5	5	5	5	5	5	5	5	5	5	5	5	5	5	5	5	5	5
GSM282472	2	2	2	2	2	2	2	2	2	2	2	2	2	2	2	2	2	2	2	2	2	2	2	2	2
GSM282473	2	2	2	2	2	2	2	2	2	1	2	2	1	2	2	2	2	2	2	2	2	2	2	2	1
GSM282474	5	5	5	5	5	5	5	5	5	2	4	2	2	4	5	5	1	5	1	5	4	5	5	5	1
GSM282475	2	3	2	2	2	2	2	2	2	2	2	2	2	2	2	2	2	2	2	2	2	2	2	2	1
GSM282476	2	1	2	2	2	2	2	2	1	2	1	2	1	2	2	2	2	2	2	2	1	2	2	2	1
GSM282477	3	3	3	3	3	2	2	3	3	2	1	3	3	2	3	3	3	3	3	3	1	2	3	3	3
GSM282478	4	4	4	4	4	5	4	5	4	4	1	1	2	4	5	4	5	4	1	4	1	4	1	4	1
GSM282479	1	1	2	2	2	1	1	1	1	2	1	1	1	2	2	1	2	2	1	2	1	1	1	2	1
GSM282480	2	2	2	2	2	2	2	2	1	2	2	2	2	2	2	2	2	2	2	2	2	2	2	2	2
GSM282481	2	1	2	2	2	2	2	1	2	1	1	2	1	1	2	1	2	2	1	2	1	2	1	2	2
GSM282482	INC	4	4	4	4	5	4	5	5	2	4	5	5	4	5	4	5	5	4	4	4	4	5	5	5
GSM282483	2	2	3	3	2	2	2	2	2	1	5	2	2	2	2	2	2	2	1	2	5	2	2	1	2
GSM282484	2	2	2	2	2	2	2	2	2	2	1	2	2	2	2	2	2	2	1	2	1	2	2	2	2
GSM282485	1	1	1	1	1	1	1	1	2	1	1	1	1	1	1	1	1	2	1	1	1	1	1	2	1
GSM282486	1	1	1	1	2	1	2	1	1	1	1	1	1	1	1	1	1	1	1	1	1	2	1	1	1
GSM282487	1	2	1	1	2	2	2	1	1	1	1	1	2	1	1	2	2	2	1	1	1	2	1	2	1
GSM282488	2	2	2	2	2	2	2	2	2	2	1	2	2	1	2	2	1	2	2	2	1	2	2	2	1
GSM282489	3	3	3	3	3	2	3	3	3	2	1	3	3	3	3	3	5	3	4	3	1	3	3	5	3
GSM282490	2	1	2	2	2	2	2	2	2	2	1	1	1	1	2	1	1	2	1	2	1	2	2	2	2
GSM282491	2	2	2	2	2	2	2	2	2	2	2	2	2	2	2	2	2	2	2	2	2	2	2	2	2
GSM282492	1	1	1	1	2	2	1	1	1	1	1	2	1	1	1	1	1	2	1	1	1	1	1	1	1
GSM282493	3	3	3	3	3	2	3	3	3	2	5	3	3	3	2	3	3	3	4	3	5	3	3	5	3
GSM282494	1	1	1	1	1	1	1	1	1	1	4	1	1	1	1	1	1	2	1	1	4	1	1	2	1
GSM282495	2	2	2	2	2	2	2	2	2	2	2	2	2	2	2	2	2	2	2	2	2	2	2	2	2
GSM282496	1	1	1	1	1	1	1	1	1	1	1	1	1	1	1	1	1	1	1	1	1	1	1	2	1
GSM282497	5	5	5	5	5	5	5	5	5	5	5	2	5	5	5	5	1	5	1	5	5	5	5	5	1
GSM282498	1	1	1	1	1	1	1	1	1	1	1	1	1	1	1	1	1	2	1	1	1	1	1	1	1
GSM282499	INC	1	2	2	2	2	2	1	2	1	1	2	1	1	1	1	1	2	2	2	1	2	1	2	1
GSM282500	1	4	4	4	4	1	1	1	1	4	1	1	1	1	1	1	1	4	1	4	1	1	1	4	1
GSM282501	1	4	4	4	4	1	1	1	1	1	4	1	1	1	1	1	1	2	1	4	4	1	1	1	1
GSM282502	3	3	3	3	3	2	2	2	3	2	3	3	3	3	2	3	3	3	3	3	3	2	3	5	3
GSM282503	1	1	1	1	1	1	1	1	1	1	1	1	1	1	1	1	1	2	1	1	1	1	1	1	1
GSM282504	1	1	1	1	1	1	1	1	1	1	1	1	1	1	1	1	2	2	2	1	1	1	1	2	1
GSM282506	2	2	2	2	2	2	2	2	2	2	1	2	2	2	2	2	1	2	1	2	1	2	1	1	1
GSM282507	2	2	2	2	2	2	2	2	2	2	2	2	2	2	2	2	2	2	2	2	2	2	2	2	2
GSM282508	5	5	5	5	5	5	5	5	5	5	5	5	5	5	5	5	5	5	5	5	5	5	5	5	5
GSM282509	1	1	4	4	1	1	1	1	4	1	1	1	1	1	1	1	1	1	1	4	1	1	1	1	1
GSM282510	2	2	2	2	2	2	2	2	2	2	1	2	2	4	2	2	2	2	2	2	1	2	2	2	1
GSM282511	INC	5	4	4	4	2	5	2	5	2	2	2	2	2	2	2	1	5	1	4	2	5	5	2	1
GSM282512	1	1	1	1	1	1	1	1	1	1	1	1	1	1	1	1	1	1	1	1	1	1	1	1	1
GSM282513	2	2	2	2	2	2	2	2	1	1	1	1	2	2	2	1	1	2	2	2	1	2	1	2	1
GSM282514	1	1	1	1	1	1	1	1	1	1	1	1	1	1	1	1	1	2	1	1	1	1	1	1	1
GSM282515	2	1	2	2	2	2	2	1	1	2	1	1	1	2	2	1	2	2	2	2	1	2	2	2	1
GSM282516	1	1	1	1	2	2	2	1	1	2	1	2	2	1	1	2	1	2	1	1	1	2	1	2	1
GSM282517	1	1	1	1	1	1	1	1	1	1	1	1	1	1	1	1	1	1	1	1	1	1	1	1	1
GSM282519	2	2	2	2	2	2	2	2	2	2	2	2	2	2	2	2	2	2	2	2	2	2	2	2	2
GSM282520	2	2	2	2	2	2	2	2	2	1	2	2	1	2	2	2	2	2	2	2	2	2	1	2	1
GSM282521	1	4	4	4	4	1	1	1	1	1	1	1	1	4	1	1	1	4	1	4	1	1	1	1	1
GSM282522	2	1	2	2	2	2	2	2	1	2	1	2	1	2	2	2	1	2	2	2	1	2	1	2	1
GSM282523	1	1	1	1	2	2	2	1	1	1	1	2	1	2	2	1	1	2	1	1	1	2	1	2	1
GSM282524	1	1	1	1	1	1	1	1	1	1	1	1	1	1	1	1	1	2	1	1	1	1	1	2	1
GSM282525	2	2	2	2	2	2	2	2	2	2	2	2	2	2	2	2	2	2	2	2	2	2	2	2	2
GSM282526	2	2	1	1	2	2	2	2	2	2	2	2	2	2	2	2	1	2	2	1	2	2	2	2	2
GSM282527	2	2	2	2	2	2	2	2	2	2	1	1	1	1	2	1	2	2	2	2	1	2	1	1	1
GSM282528	5	5	5	5	5	5	5	5	5	5	5	5	5	5	5	5	5	5	5	5	5	5	5	5	5
GSM282529	1	1	1	1	1	1	1	1	1	1	1	1	1	1	1	1	1	2	1	1	1	1	1	2	1
GSM282530	1	1	1	1	2	2	2	1	1	2	1	1	1	1	1	1	1	2	1	1	1	2	1	2	1
GSM282531	1	1	1	1	1	2	1	1	1	1	1	1	1	1	1	1	1	2	1	1	1	1	1	2	1
GSM282532	1	1	1	1	2	2	2	1	1	1	1	1	1	1	1	1	1	1	1	1	1	2	1	1	1
GSM282533	1	1	1	1	1	1	1	1	1	1	1	1	1	1	1	1	1	1	1	1	1	1	1	1	1
GSM282534	1	1	1	1	1	1	1	1	1	2	1	2	1	1	1	1	1	1	1	1	1	1	1	1	1
GSM282536	1	1	1	1	1	1	1	1	1	1	1	1	1	1	1	1	1	2	1	1	1	1	1	2	1
GSM282537	2	2	2	2	2	2	2	2	1	1	1	2	2	2	2	2	2	2	2	2	1	2	1	2	1
GSM282538	2	2	2	2	2	2	2	2	2	2	2	2	2	2	2	2	2	2	2	2	2	2	2	2	2
GSM282539	2	2	2	2	2	2	2	2	2	2	2	2	2	2	2	2	2	2	2	2	2	2	2	2	2
GSM282540	1	1	1	1	1	1	1	1	1	1	1	1	1	1	1	1	1	1	1	1	1	1	1	1	1
GSM282541	1	1	1	1	1	1	1	1	1	1	1	1	1	1	1	1	1	1	1	1	1	1	1	1	1
GSM282542	1	1	1	1	1	1	1	1	1	2	1	1	1	1	1	1	2	2	1	1	1	1	1	2	1
GSM282543	2	2	2	2	2	2	2	2	2	2	2	2	2	2	2	2	2	2	2	2	2	2	2	2	2
GSM282545	2	2	2	2	2	2	2	2	2	2	2	2	1	2	2	2	2	2	2	2	2	2	2	2	2
GSM282546	1	1	1	1	1	1	1	1	1	2	1	1	1	1	1	1	1	2	1	1	1	1	1	2	1
GSM282547	1	1	1	1	1	1	1	1	1	1	1	1	1	1	1	1	1	1	1	1	1	1	1	1	1
GSM282548	1	1	1	1	1	1	1	1	1	1	1	1	1	1	1	1	1	2	1	1	1	1	1	2	1
GSM282549	1	1	1	1	1	1	1	1	2	1	1	1	1	1	1	1	1	2	1	1	1	1	1	2	1
GSM282550	1	1	1	1	1	1	1	1	1	1	1	1	1	1	1	1	1	2	1	1	1	1	1	2	1
GSM282551	5	5	5	5	5	5	5	5	5	5	5	5	5	5	5	5	5	5	5	5	5	5	5	5	5
GSM282552	2	2	2	2	2	2	2	2	2	2	1	2	2	1	2	2	2	2	2	2	1	2	2	2	1
GSM282553	1	1	1	1	2	1	2	1	1	2	2	1	1	1	1	2	1	1	3	1	2	2	1	1	1
GSM282556	2	2	2	2	2	2	2	2	2	2	2	2	1	2	2	2	2	2	2	2	2	2	2	2	1
GSM282557	2	1	2	2	2	2	2	1	1	1	1	1	1	1	2	1	2	2	2	2	1	2	2	2	1
GSM282558	2	2	2	2	2	2	2	2	2	1	1	2	2	2	2	2	1	2	2	2	1	2	2	2	1
GSM282559	1	4	4	4	1	1	1	1	1	1	4	1	1	1	1	1	1	1	4	4	4	1	1	1	1
GSM282560	1	1	1	1	1	1	1	1	1	1	1	1	1	1	1	1	1	2	1	1	1	1	1	2	1
GSM282561	2	2	2	2	2	2	2	2	2	2	2	2	2	2	2	2	2	2	2	2	2	2	2	2	2
GSM282562	1	1	1	1	1	1	1	1	1	2	1	1	1	1	1	1	1	1	1	1	1	1	1	1	1
GSM282563	1	1	1	1	4	1	1	1	1	1	1	1	1	1	1	1	1	2	1	1	1	1	1	2	1
GSM282564	1	1	1	1	1	1	1	1	1	1	1	1	1	1	1	1	1	1	1	1	1	1	1	1	1
GSM282565	5	5	5	5	5	5	5	5	5	5	5	5	5	5	5	5	5	5	5	5	5	5	5	5	5
GSM282566	1	1	1	1	1	1	1	1	1	1	1	1	1	1	1	1	1	1	1	1	1	1	1	1	1
GSM282567	2	2	2	2	2	2	2	2	1	2	2	2	1	2	2	2	2	2	2	2	2	2	2	2	1
GSM282568	2	2	2	2	2	2	2	2	2	2	2	2	2	2	2	2	2	2	2	2	2	2	2	2	2
GSM282569	5	5	5	5	5	5	5	5	5	5	3	5	5	5	5	5	5	3	5	5	3	5	5	5	5
GSM282570	2	2	2	2	2	2	2	2	2	2	2	2	2	2	2	2	2	2	2	2	2	2	2	2	2
GSM282572	2	2	2	2	2	2	2	1	2	2	2	2	1	2	1	2	2	2	2	2	2	2	2	2	1
GSM36777	1	1	1	1	1	2	1	1	1	1	1	1	1	1	1	1	2	2	1	1	1	1	1	2	1
GSM36778	2	2	2	2	2	2	2	2	2	1	2	2	2	2	2	2	2	2	2	2	2	2	2	1	1
GSM36779	1	1	1	1	1	1	1	1	1	1	1	1	1	1	1	1	1	2	1	1	1	1	1	2	1
GSM36780	3	3	3	3	3	3	3	3	3	3	1	3	3	3	1	3	5	3	4	3	1	3	3	5	3
GSM36781	3	3	3	3	3	2	3	3	3	3	3	3	3	3	2	3	3	3	3	3	3	3	3	3	3
GSM36782	1	1	1	1	1	1	1	1	1	1	1	1	1	1	1	1	1	2	1	1	1	1	1	1	1
GSM36783	1	1	1	1	1	1	1	1	1	1	1	1	1	1	1	1	1	2	1	1	1	1	1	1	1
GSM36784	1	1	1	1	2	2	2	1	2	2	1	1	1	1	1	1	1	2	1	1	1	2	1	2	1
GSM36785	2	2	2	2	2	2	2	2	2	2	2	2	2	2	2	2	2	2	2	2	2	2	2	2	2
GSM36788	5	5	5	5	5	5	5	5	5	2	3	5	3	5	5	3	5	3	3	5	3	5	5	5	5
GSM36789	2	2	2	2	2	2	2	2	1	2	2	2	1	2	2	2	2	2	2	2	2	2	2	1	1
GSM36790	1	1	1	1	1	1	1	1	1	1	1	1	1	1	1	1	1	2	1	1	1	1	1	2	1
GSM36791	1	1	1	1	2	2	1	1	1	1	1	1	1	1	1	1	1	1	1	1	1	1	1	1	1
GSM36792	2	2	2	2	2	2	2	2	2	2	2	2	1	2	2	2	2	2	2	2	2	2	2	2	2
GSM36793	4	4	4	4	4	4	4	4	4	1	5	1	1	1	4	4	1	5	1	4	5	4	4	2	1
GSM36796	1	1	1	1	2	1	1	1	1	1	1	1	1	1	1	1	1	2	1	1	1	1	1	1	1
GSM36797	5	5	5	5	5	5	5	5	5	2	5	5	5	5	5	5	5	5	5	5	5	5	5	5	5
GSM36798	5	5	5	5	5	5	5	5	5	2	5	5	5	5	5	5	5	5	5	5	5	5	5	5	5
GSM36799	2	2	2	2	2	2	2	2	1	1	2	2	2	2	2	2	2	2	2	2	2	2	2	2	2
GSM36800	2	2	2	2	2	2	2	2	2	2	2	2	2	2	2	2	2	2	2	2	2	2	2	2	1
GSM36801	2	2	2	2	2	2	2	2	2	2	2	2	2	2	2	2	2	2	2	2	2	2	2	2	2
GSM36803	2	1	2	2	2	2	2	1	1	2	1	1	1	1	2	1	2	2	2	2	1	2	1	2	1
GSM36804	1	1	1	1	1	1	1	1	1	1	1	1	1	1	1	1	1	1	1	1	1	1	1	2	1
GSM36805	2	2	2	2	2	2	2	2	2	2	2	2	1	2	2	2	2	2	2	2	2	2	2	2	1
GSM36806	1	1	1	1	1	1	1	1	1	1	1	1	1	1	1	1	1	2	1	1	1	1	1	2	1
GSM36807	1	4	4	4	4	4	1	1	1	1	4	1	1	1	1	1	1	1	1	4	4	1	1	1	1
GSM36808	1	1	4	4	4	1	1	1	1	1	2	1	1	1	1	1	1	1	1	4	2	1	1	2	1
GSM36809	5	5	5	5	5	5	5	5	5	2	3	5	5	5	5	5	5	3	4	5	3	5	5	5	5
GSM36810	2	2	2	2	2	2	2	2	1	1	2	2	1	2	2	2	2	1	2	2	2	2	2	1	1
GSM36811	1	1	1	1	4	1	1	1	1	2	1	1	1	1	1	1	1	2	1	1	1	1	1	2	1
GSM36813	1	1	1	1	2	2	2	1	1	2	1	1	2	2	1	2	1	2	1	1	1	2	1	2	1
GSM36814	1	1	4	4	2	2	2	1	1	1	1	1	2	1	1	1	1	1	1	4	1	2	1	1	1
GSM36816	2	2	4	4	4	2	2	2	2	2	2	2	2	2	2	2	5	5	1	4	2	2	1	2	1
GSM36817	INC	5	4	4	4	5	5	4	4	1	2	2	4	2	5	2	1	5	1	4	2	5	1	2	1
GSM36818	2	2	2	2	2	2	2	2	1	2	1	2	1	2	2	2	2	2	2	2	1	2	2	2	1
GSM36819	1	1	1	1	2	2	1	1	1	1	1	1	1	2	1	1	1	1	1	1	1	1	1	1	1
GSM36820	2	2	2	2	2	2	2	2	2	2	2	2	2	2	2	2	2	2	2	2	2	2	2	2	2
GSM36821	2	2	2	2	2	2	2	2	2	2	2	2	2	2	2	2	2	2	2	2	2	2	2	1	2
GSM36822	5	5	5	5	5	5	5	5	5	2	5	5	5	5	5	5	5	5	5	5	5	5	5	3	5
GSM36824	5	5	5	5	5	5	5	5	5	5	5	5	5	5	5	5	5	5	5	5	5	5	5	3	5
GSM36825	1	1	1	1	1	1	1	1	1	1	1	1	1	1	1	1	1	2	1	1	1	1	1	1	1
GSM36826	2	2	2	2	2	2	2	2	2	1	1	2	1	2	1	1	1	2	1	2	1	2	1	1	1
GSM36827	5	5	5	5	5	5	5	5	5	5	5	5	5	5	5	5	5	5	5	5	5	5	5	5	5
GSM36828	5	5	5	5	5	5	5	5	5	2	5	5	5	5	5	5	5	5	5	5	5	5	5	5	5
GSM36829	2	2	2	2	2	2	2	2	2	2	1	2	2	1	2	1	1	2	2	2	1	2	2	2	2
GSM36830	INC	1	2	2	2	2	2	1	2	1	1	1	1	1	2	1	2	2	1	2	1	2	1	2	1
GSM36831	1	1	1	1	1	1	1	1	1	1	1	1	1	1	1	1	1	1	1	1	1	1	1	1	1
GSM36832	1	1	1	1	1	1	1	1	1	2	1	1	1	1	1	1	1	2	1	1	1	1	1	2	1
GSM36833	3	3	3	3	3	3	3	3	3	3	3	3	3	3	3	3	5	3	3	3	3	3	3	3	3
GSM36834	2	2	2	2	2	2	2	2	2	2	2	2	2	2	2	2	2	2	2	2	2	2	2	2	2
GSM36835	5	5	5	5	5	5	5	5	5	2	5	2	5	5	5	5	5	5	5	5	5	5	5	2	1
GSM36836	1	1	1	1	2	2	1	1	1	2	1	1	1	1	1	1	1	1	1	1	1	1	1	2	1
GSM36837	2	2	2	2	2	2	2	2	2	2	2	2	1	2	2	2	2	2	2	2	2	2	2	2	1
GSM36838	2	2	2	2	2	2	2	2	2	2	1	2	1	2	2	2	1	2	2	2	1	2	2	2	2
GSM36839	1	1	1	1	1	1	1	1	1	1	1	1	1	1	1	1	1	1	1	1	1	1	1	1	1
GSM36841	2	2	2	2	2	2	2	2	2	2	2	2	1	2	2	2	2	2	2	2	2	2	2	2	1
GSM36842	1	1	1	1	4	1	2	1	1	2	1	1	1	1	1	1	1	2	4	1	1	2	1	2	1
GSM36843	2	2	2	2	2	2	2	1	1	1	1	2	1	2	2	2	2	2	2	2	1	2	2	2	1
GSM36844	2	2	2	2	2	2	2	2	2	2	1	2	2	2	2	2	1	2	2	2	1	2	2	2	1
GSM36845	1	1	1	1	1	1	1	1	2	2	1	1	1	1	1	1	1	2	1	1	1	1	1	2	1
GSM36846	5	5	5	5	5	5	5	5	5	2	5	5	5	5	5	5	5	5	5	5	5	5	5	3	5
GSM36847	5	5	4	4	5	5	5	5	5	5	5	5	5	5	5	5	5	5	5	5	5	5	5	3	5
GSM36848	1	1	1	1	1	1	1	1	1	1	1	1	1	1	1	1	1	2	1	1	1	1	1	1	1
GSM36849	1	1	2	2	2	1	1	1	1	2	1	1	1	1	1	2	2	2	1	2	1	1	1	2	1
GSM36850	1	1	1	1	1	1	1	1	2	2	1	1	1	1	1	1	1	2	1	1	1	1	1	2	1
GSM36851	INC	4	4	4	4	4	3	3	3	2	4	5	3	3	4	3	1	3	4	4	4	3	3	5	3
GSM36852	2	1	2	2	2	2	2	2	2	2	2	2	1	2	2	1	2	1	1	2	2	2	1	2	1
GSM36853	1	1	1	1	1	2	1	1	1	1	1	1	1	1	1	1	1	2	1	1	1	1	1	2	1
GSM36854	1	1	1	1	4	2	2	1	2	2	1	2	1	1	2	1	1	1	1	1	1	2	1	2	1
GSM36855	5	5	5	5	5	5	5	5	5	5	5	5	5	5	5	5	5	5	5	5	5	5	5	3	5
GSM36856	2	2	2	2	2	2	2	2	1	1	1	2	1	2	2	2	2	2	2	2	1	2	2	1	2
GSM36857	2	2	2	2	2	2	2	2	1	2	2	2	1	2	2	2	2	2	2	2	2	2	1	1	1
GSM36858	2	2	2	2	2	2	2	2	1	2	2	2	2	2	2	2	2	2	2	2	2	2	2	2	2
GSM36859	1	1	1	1	1	1	1	1	1	1	1	1	1	1	1	1	1	2	1	1	1	1	1	2	1
GSM36860	2	2	2	2	2	2	2	2	2	2	2	2	2	2	2	2	2	2	2	2	2	2	2	2	2
GSM36861	1	1	1	1	1	1	1	1	1	1	1	1	1	1	1	1	1	2	1	1	1	1	1	2	1
GSM36862	5	5	5	5	5	5	5	5	5	5	5	5	5	5	5	5	5	5	5	5	5	5	5	5	5
GSM36863	2	2	2	2	2	2	2	2	1	2	2	2	2	2	2	2	2	2	2	2	2	2	2	1	1
GSM36864	2	2	2	2	2	2	2	2	2	1	2	2	2	2	2	2	2	1	2	2	2	2	2	1	1
GSM36865	5	5	5	5	5	5	5	5	5	2	5	5	5	5	5	5	5	5	5	5	5	5	5	3	5
GSM36866	1	1	1	1	2	1	1	1	1	1	1	1	1	1	1	1	2	2	2	1	1	1	1	2	1
GSM36867	2	2	2	2	2	2	2	2	2	1	1	2	1	2	2	2	2	2	2	2	1	2	1	2	2
GSM36868	1	1	1	1	1	1	1	1	1	1	1	1	1	1	1	1	1	2	1	1	1	1	1	2	1
GSM36870	2	2	2	2	2	2	2	2	2	2	2	2	2	2	2	2	2	2	2	2	2	2	2	2	2
GSM36871	1	1	1	1	1	1	1	1	1	2	1	1	1	1	1	1	1	2	1	1	1	1	1	1	1
GSM36872	2	2	2	2	2	2	2	2	2	2	1	2	2	2	2	2	2	3	1	2	1	2	2	2	1
GSM36873	2	2	2	2	2	2	2	2	2	2	2	2	2	2	2	2	2	2	2	2	2	2	2	2	2
GSM36874	1	1	1	1	2	1	2	1	1	2	1	1	1	2	1	1	1	2	1	1	1	2	1	1	1
GSM36875	5	5	5	5	5	5	5	5	5	2	5	5	5	5	5	5	5	5	5	5	5	5	5	3	5
GSM36876	5	5	5	5	5	5	5	5	5	5	5	5	5	5	5	5	5	5	5	5	5	5	5	3	5
GSM36877	2	2	2	2	2	2	2	2	2	2	2	2	2	2	2	2	2	2	2	2	2	2	2	2	2
GSM36878	2	2	2	2	2	2	2	2	2	2	2	2	2	2	2	2	2	2	2	2	2	2	2	2	2
GSM36879	INC	3	3	3	2	2	2	2	3	1	1	2	2	2	2	2	5	3	1	3	1	2	1	2	1
GSM36880	1	1	1	1	2	2	2	1	1	1	1	2	1	1	1	1	1	2	1	1	1	2	1	1	2
GSM36881	2	2	2	2	2	2	2	2	2	2	2	2	2	2	2	2	2	2	2	2	2	2	2	2	1
GSM36882	1	1	1	1	1	1	1	1	1	1	1	1	1	1	1	1	1	1	1	1	1	1	1	1	1
GSM36883	1	1	4	4	4	1	1	1	4	2	1	1	1	1	1	1	1	1	1	4	1	1	1	2	1
GSM36884	2	2	2	2	2	2	2	2	2	2	2	2	2	2	2	2	2	2	2	2	2	2	2	2	1
GSM36885	1	1	1	1	1	1	1	1	1	1	1	1	1	1	1	1	1	1	1	1	1	1	1	2	1
GSM36886	2	2	2	2	2	2	2	2	2	2	2	2	2	2	2	1	2	2	2	2	2	2	1	1	1
GSM36887	1	1	1	1	2	1	1	1	2	2	2	1	1	1	1	1	1	2	1	1	2	1	1	2	1
GSM36888	2	2	2	2	2	2	2	2	1	2	1	2	2	2	2	2	1	2	2	2	1	2	2	2	2
GSM36889	1	1	4	4	2	1	1	1	1	2	1	1	1	1	2	1	1	1	1	1	1	1	1	2	1
GSM36890	1	1	3	3	4	1	1	1	1	2	1	1	3	1	1	1	5	1	1	3	1	1	1	1	1
GSM36891	5	5	5	5	5	5	5	5	5	5	5	5	5	5	5	5	5	5	5	5	5	5	5	3	5
GSM36892	2	2	1	1	2	2	2	2	1	2	1	2	2	1	2	2	2	2	2	1	1	2	2	1	2
GSM36893	2	1	2	2	2	2	2	2	1	2	1	1	1	2	2	2	1	2	1	2	1	2	1	2	1
GSM36894	1	4	4	4	1	4	1	1	1	1	4	1	1	1	1	1	1	1	1	4	4	1	1	1	1
GSM36895	2	1	2	2	2	1	2	2	2	2	1	1	1	1	1	2	2	2	2	2	1	2	2	2	1
GSM36896	1	1	1	1	1	1	1	1	1	2	1	1	1	1	1	1	2	2	1	1	1	1	1	2	1
GSM36897	1	2	1	1	2	2	2	1	1	2	1	1	1	2	1	1	1	2	1	1	1	2	1	2	2
GSM36898	1	1	4	4	1	2	1	1	1	1	1	1	1	1	1	1	1	2	1	4	1	1	1	1	1
GSM36899	2	2	2	2	2	2	2	2	2	2	2	2	2	2	2	2	2	2	2	2	2	2	2	2	2
GSM36901	5	5	5	5	5	5	5	5	5	5	5	5	5	5	5	5	5	5	5	5	5	5	5	5	5
GSM36902	4	4	4	4	4	4	4	4	4	1	4	5	1	4	4	4	1	5	4	4	4	4	5	3	5
GSM36903	2	2	2	2	2	2	2	2	2	2	2	2	2	2	2	2	2	2	2	2	2	2	2	2	2
GSM36904	1	1	3	3	4	2	2	1	3	2	1	1	1	1	1	1	1	1	4	3	1	2	2	1	1
GSM36905	4	4	4	4	4	4	4	4	4	2	4	4	3	4	4	3	5	3	3	4	4	4	1	3	5
GSM36906	3	3	3	3	3	3	2	3	3	2	3	3	3	3	2	3	3	3	3	3	3	2	3	5	3
GSM36907	1	1	1	1	2	2	1	1	2	1	1	2	1	1	1	2	2	2	2	1	1	1	1	2	1
GSM36908	2	2	2	2	2	2	2	2	2	2	2	2	2	2	2	2	2	2	2	2	2	2	2	2	2
GSM36909	4	4	4	4	4	4	4	4	4	1	2	1	3	4	4	4	1	3	1	4	2	4	1	3	1
GSM36910	1	1	1	1	1	1	1	1	1	1	1	1	1	1	1	1	1	2	1	1	1	1	1	1	1
GSM36911	2	2	2	2	2	2	2	2	2	2	1	2	1	2	2	2	2	2	2	2	1	2	2	2	1
GSM36912	5	5	5	5	5	5	5	5	5	1	5	5	5	5	5	5	5	5	5	5	5	5	5	5	5
GSM36914	1	1	1	1	2	1	1	1	1	1	1	1	1	1	1	1	1	2	1	1	1	1	1	1	1
GSM36915	4	4	4	4	4	4	2	1	4	4	4	3	3	3	4	3	5	4	4	4	4	2	1	3	3
GSM36916	1	1	1	1	1	1	1	1	1	1	1	1	1	1	1	1	1	1	1	1	1	1	1	1	1
GSM36917	1	1	1	1	2	1	1	1	2	1	1	2	1	1	1	1	1	2	1	1	1	1	1	2	2
GSM36918	4	4	4	4	4	4	4	4	4	1	1	1	4	4	4	1	1	4	4	4	1	4	1	2	1
GSM36919	1	1	1	1	2	2	1	1	2	2	1	1	1	1	1	1	1	2	1	1	1	1	1	2	1
GSM36920	2	2	2	2	2	2	2	2	2	1	1	2	2	2	2	2	1	2	2	2	1	2	2	2	2
GSM36921	2	2	2	2	2	2	2	2	1	2	2	2	2	2	2	2	2	2	2	2	2	2	2	2	2
GSM36922	2	2	2	2	2	2	2	2	1	1	2	2	1	2	2	2	2	2	2	2	2	2	2	2	1
GSM36923	5	5	5	5	5	5	5	5	5	2	4	4	5	5	5	5	5	5	4	5	4	5	5	5	5
GSM36924	2	2	2	2	2	2	2	2	2	1	2	2	1	2	2	2	2	2	2	2	2	2	2	2	1
GSM36925	1	1	1	1	1	1	1	1	1	1	1	1	1	1	1	1	1	1	1	1	1	1	1	2	1
GSM36926	3	2	3	3	2	2	2	3	3	2	1	3	3	1	2	3	3	3	3	3	1	2	3	5	3
GSM36927	5	5	5	5	5	5	5	5	5	5	5	5	5	5	5	5	5	5	5	5	5	5	5	5	5
GSM36928	1	1	1	1	1	1	1	1	1	1	1	1	1	1	1	1	2	2	2	1	1	1	1	2	1
GSM36930	2	2	2	2	2	2	2	2	2	2	2	2	1	2	2	2	2	2	2	2	2	2	2	2	1
GSM36931	5	5	5	5	5	5	5	5	5	2	5	5	5	5	5	5	5	5	5	5	5	5	5	5	5
GSM36932	1	1	4	4	1	1	1	1	1	1	1	1	1	1	1	1	1	1	1	4	1	1	1	1	1
GSM36933	2	2	2	2	2	2	2	2	2	1	2	2	2	1	2	2	2	2	2	2	2	2	2	2	2
GSM36934	2	2	2	2	2	2	2	2	2	2	2	2	2	2	2	2	1	2	2	2	2	2	2	2	1
GSM36935	5	5	5	5	5	5	5	5	5	5	5	5	5	5	5	5	5	5	5	5	5	5	5	5	5
GSM36937	5	5	5	5	5	5	5	5	5	5	5	5	5	5	5	5	5	5	5	5	5	5	5	5	5
GSM36938	2	2	2	2	2	2	2	2	2	2	2	2	2	2	2	2	2	2	2	2	2	2	2	1	2
GSM36939	2	2	2	2	2	2	2	2	2	2	2	2	2	2	2	2	2	2	2	2	2	2	2	2	2
GSM36940	5	5	5	5	5	5	5	5	5	5	5	5	5	5	5	5	5	5	5	5	5	5	5	5	5
GSM36941	5	5	5	5	5	5	5	5	5	5	5	5	5	5	5	5	5	5	5	5	5	5	5	3	5
GSM36942	1	1	1	1	1	2	1	1	1	1	1	1	1	1	1	1	1	1	1	1	1	1	1	2	1
GSM36944	1	1	1	1	2	1	1	1	1	1	1	1	1	1	1	1	1	1	1	1	1	1	1	1	1
GSM36945	1	1	1	1	1	1	1	1	1	1	1	1	1	1	1	1	1	2	1	1	1	1	1	2	1
GSM36946	2	2	2	2	2	2	2	2	2	2	2	2	2	2	2	2	2	2	2	2	2	2	2	2	2
GSM36947	2	2	2	2	2	2	2	2	2	2	2	2	2	2	2	2	2	2	2	2	2	2	2	2	2
GSM36948	2	2	2	2	2	2	2	2	2	2	2	2	1	2	2	2	2	2	2	2	2	2	2	2	1
GSM36949	5	5	5	5	5	5	5	5	5	2	3	5	5	5	5	5	5	3	3	5	3	5	5	5	5
GSM36950	1	1	1	1	2	2	1	1	1	1	1	1	1	1	1	1	1	2	1	1	1	1	1	2	1
GSM36951	2	1	2	2	2	2	2	2	2	2	2	2	1	2	2	2	2	2	2	2	2	2	2	2	1
GSM36952	5	5	5	5	5	5	5	5	5	5	5	5	5	5	5	5	5	5	5	5	5	5	5	5	5
GSM36953	INC	3	4	4	2	2	2	1	3	2	5	2	2	1	1	1	5	2	1	4	5	2	1	2	1
GSM36954	2	2	2	2	2	2	2	2	2	2	2	2	2	2	2	2	2	2	2	2	2	2	2	2	2
GSM36955	3	3	3	3	4	2	2	3	3	2	4	3	3	3	2	3	3	3	3	3	4	2	1	3	3
GSM36957	1	1	1	1	1	1	1	1	1	1	1	1	1	1	1	1	1	2	1	1	1	1	1	1	1
GSM36958	1	1	4	4	4	1	1	1	1	1	1	1	1	1	1	1	1	1	4	4	1	1	1	1	1
GSM36959	5	5	5	5	5	5	5	5	5	3	5	5	5	5	5	5	5	5	5	5	5	5	5	5	5
GSM36960	5	5	5	5	5	5	5	5	5	5	5	5	5	5	5	5	5	5	5	5	5	5	5	5	5
GSM36961	3	3	3	3	4	4	3	3	3	2	5	3	3	3	1	3	5	3	4	3	5	3	3	5	3
GSM36962	1	1	4	4	1	1	1	1	1	1	1	1	1	1	1	1	1	2	1	1	1	1	1	1	1
GSM36963	2	2	2	2	2	2	2	2	2	2	1	2	2	2	2	2	1	2	1	2	1	2	1	2	2
GSM36964	3	3	3	3	3	2	2	5	3	3	5	3	3	3	2	3	5	3	3	3	5	2	2	1	3
GSM36965	1	1	1	1	2	2	2	1	1	1	1	1	1	1	1	2	1	1	1	1	1	2	1	1	1
GSM36966	5	5	5	5	5	5	5	5	5	5	5	5	5	5	5	5	5	5	5	5	5	5	5	5	5
GSM36967	2	2	2	2	2	2	2	2	2	2	2	2	2	2	2	2	2	2	2	2	2	2	2	2	1
GSM36968	3	3	3	3	3	3	3	3	3	3	1	3	3	3	5	3	5	3	3	3	1	3	3	3	3
GSM36969	5	5	5	5	5	5	5	5	5	5	5	5	5	5	5	5	5	5	5	5	5	5	5	5	5
GSM36970	1	1	1	1	1	1	1	1	1	2	1	1	1	1	1	1	1	2	1	1	1	1	1	1	1
GSM36971	1	1	1	1	2	2	2	1	2	1	1	2	2	1	2	1	1	2	1	1	1	2	1	1	1
GSM36972	2	1	2	2	2	2	2	2	1	2	1	2	1	2	2	2	2	2	2	2	1	2	1	2	1
GSM36973	2	1	2	2	2	2	2	2	1	2	1	1	1	2	2	2	2	2	2	2	1	2	1	2	1
GSM36974	2	2	2	2	2	2	2	2	2	2	2	2	2	2	2	2	2	2	2	2	2	2	2	2	2
GSM36975	INC	3	3	3	2	2	2	2	2	2	4	3	1	1	1	3	3	3	4	3	4	2	1	3	3
GSM36976	1	1	1	1	2	2	2	1	1	2	1	1	1	1	1	1	1	2	1	1	1	2	1	2	1
GSM36977	5	5	5	5	5	5	5	5	5	3	5	5	5	5	5	5	5	5	5	5	5	5	5	3	5
GSM36978	INC	4	4	4	4	4	1	4	4	1	4	3	3	3	4	3	1	3	4	4	4	1	3	3	3
GSM36979	2	2	2	2	2	2	2	2	2	2	2	2	2	2	2	2	2	2	2	2	2	2	2	2	2
GSM36980	1	1	1	1	1	1	1	1	1	2	1	1	1	1	1	1	1	2	1	1	1	1	1	2	1
GSM36981	5	5	5	5	5	5	5	5	5	3	5	5	5	5	5	5	5	5	5	5	5	5	5	5	5
GSM36982	1	4	4	4	4	4	1	1	1	1	4	1	1	1	1	4	1	1	4	4	4	1	1	1	1
GSM36983	1	1	1	1	1	1	1	1	1	1	1	1	1	1	1	1	1	2	1	1	1	1	1	1	1
GSM36984	2	2	2	2	2	2	2	2	2	2	2	2	1	2	2	1	2	2	2	2	2	2	2	2	1
GSM36985	2	2	2	2	2	2	2	2	2	2	1	1	2	2	2	2	1	2	2	2	1	2	2	2	2
GSM36986	1	1	1	1	1	2	1	1	1	1	1	1	1	1	1	2	2	2	2	1	1	1	1	1	1
GSM36987	1	1	1	1	2	2	2	1	1	1	1	1	1	1	1	1	1	2	1	1	1	2	1	2	1
GSM36988	2	1	2	2	2	2	2	2	2	2	1	2	2	2	2	2	1	2	1	2	1	2	1	2	1
GSM36989	2	2	2	2	2	2	2	2	2	2	2	2	2	2	2	2	2	2	2	2	2	2	2	2	2
GSM36990	1	1	1	1	1	2	1	1	1	2	1	1	1	1	1	1	1	2	1	1	1	1	1	1	1
GSM36991	5	5	5	5	4	5	5	5	5	5	5	5	5	5	5	5	5	5	5	5	5	5	5	5	5
GSM36994	1	1	1	1	1	1	1	1	1	1	1	1	1	1	1	1	1	2	1	1	1	1	1	2	1
GSM36995	2	2	2	2	2	2	2	2	2	2	2	2	2	2	2	2	2	2	2	2	2	2	2	1	2
GSM36996	INC	3	3	3	2	2	2	2	1	2	5	2	2	2	2	2	5	3	1	3	5	2	1	3	1
GSM36997	2	2	2	2	2	2	2	2	2	2	2	2	2	2	2	2	2	2	2	2	2	2	2	2	2
GSM36998	1	1	1	1	1	1	1	1	1	1	1	1	1	1	1	1	1	2	1	1	1	1	1	2	1
GSM36999	1	1	1	1	2	2	1	1	1	1	1	2	1	1	1	2	2	2	1	1	1	1	1	2	1
GSM37000	1	1	1	1	1	2	1	1	1	1	1	1	1	1	1	1	1	1	1	1	1	1	1	2	1
GSM37001	1	1	1	1	2	1	1	1	1	1	1	1	1	1	1	1	1	1	1	1	1	1	1	1	1
GSM37002	5	5	5	5	5	5	5	5	5	5	5	5	5	5	5	5	5	5	5	5	5	5	5	3	5
GSM37003	2	2	2	2	2	2	2	2	2	2	2	2	2	2	2	2	2	2	2	2	2	2	2	2	2
GSM37004	2	2	2	2	2	2	2	2	2	2	1	2	2	2	2	2	2	2	2	2	1	2	2	2	1
GSM37005	1	1	1	1	1	1	1	1	1	2	2	1	1	1	1	1	2	1	1	1	2	1	1	1	1
GSM37006	2	2	2	2	2	2	2	2	2	1	1	2	2	2	2	2	2	2	2	2	1	2	1	2	1
GSM37007	2	2	2	2	2	2	2	2	2	2	2	2	2	2	2	2	2	2	2	2	2	2	2	2	2
GSM37008	1	1	1	1	2	2	2	2	2	1	1	1	1	2	2	1	1	2	1	1	1	2	1	2	1
GSM37009	1	1	1	1	2	2	2	1	1	2	1	1	1	1	1	1	2	2	1	1	1	2	1	2	1
GSM37010	INC	1	1	1	2	2	1	1	2	1	2	2	1	1	1	2	2	2	2	1	2	1	2	2	1
GSM37011	2	2	2	2	2	2	2	2	1	1	1	2	1	2	2	2	2	2	2	2	1	2	2	2	1
GSM37012	1	1	1	1	1	1	1	1	1	1	1	1	1	1	1	1	1	2	1	1	1	1	1	2	1
GSM37013	1	1	1	1	2	2	1	1	2	2	1	1	1	2	1	2	1	2	1	1	1	1	2	2	1
GSM37014	2	2	2	2	2	2	2	2	2	2	2	2	2	2	2	2	2	2	2	2	2	2	2	2	2
GSM37015	1	1	1	1	1	1	1	1	1	1	1	1	1	1	1	1	1	1	1	1	1	1	1	2	1
GSM37016	3	3	3	3	3	3	3	3	3	2	3	3	3	3	2	3	3	3	3	3	3	3	3	5	3
GSM37017	5	5	5	5	5	5	5	5	5	2	5	5	5	5	5	5	5	5	5	5	5	5	5	3	5
GSM37018	2	2	2	2	2	2	2	2	2	2	2	2	2	2	2	2	2	2	2	2	2	2	1	2	2
GSM37019	1	1	1	1	2	2	2	1	1	2	1	1	1	1	1	1	1	1	1	1	1	2	1	1	1
GSM37020	2	3	3	3	2	2	2	2	2	2	2	2	2	2	2	2	2	2	2	3	2	2	2	1	2
GSM37021	5	5	5	5	5	5	5	5	5	5	5	5	5	5	5	5	5	5	5	5	5	5	5	5	5
GSM37022	5	5	5	5	5	5	5	5	5	2	5	5	5	5	5	5	5	5	5	5	5	5	5	5	5
GSM37023	INC	3	3	3	2	2	2	2	2	2	3	3	3	1	5	3	3	3	4	3	3	2	2	5	3
GSM37024	1	1	1	1	2	2	1	1	1	1	1	1	1	1	1	1	2	1	1	1	1	1	1	2	1
GSM37025	1	1	2	2	2	2	2	2	1	1	1	1	1	1	2	1	1	2	1	2	1	2	1	2	1
GSM37026	1	1	1	1	1	2	1	1	1	1	1	1	1	2	1	1	2	1	2	1	1	1	2	2	1
GSM37027	2	2	1	1	2	2	2	2	2	2	1	2	1	1	2	1	2	2	1	1	1	2	1	2	1
GSM37028	1	1	1	1	2	1	1	1	1	1	1	1	1	1	1	1	1	2	1	1	1	1	1	1	1
GSM37029	2	2	2	2	2	2	2	2	2	2	2	2	1	2	2	2	2	2	2	2	2	2	2	2	1
GSM37031	2	2	2	2	2	2	2	2	2	2	2	2	2	2	2	2	2	2	2	2	2	2	2	2	2
GSM37032	1	1	1	1	1	1	1	1	2	2	1	1	1	1	1	1	2	2	1	1	1	1	1	2	1
GSM37033	1	1	1	1	1	1	1	1	1	1	1	1	1	1	1	1	1	1	1	1	1	1	1	1	1
GSM37034	3	3	3	3	2	2	2	2	3	2	1	3	3	3	2	3	3	3	3	3	1	2	2	3	3
GSM37035	2	2	2	2	2	2	2	2	2	2	2	2	2	2	2	2	2	2	2	2	2	2	2	2	2
GSM37036	2	2	2	2	2	2	2	2	2	2	1	2	2	2	2	2	2	1	2	2	1	2	1	2	1
GSM37037	2	2	2	2	2	2	2	2	2	2	2	2	1	2	2	2	2	2	2	2	2	2	2	2	1
GSM37038	2	2	2	2	2	2	2	2	1	2	2	2	2	2	2	2	2	2	2	2	2	2	2	2	2
GSM37039	1	1	1	1	2	1	1	1	1	2	1	1	1	1	1	1	1	2	1	1	1	1	1	2	1
GSM37040	5	5	5	5	5	5	5	5	5	2	3	5	5	5	5	5	5	3	4	5	3	5	5	5	5
GSM37041	1	1	1	1	4	1	1	1	1	2	1	1	1	1	1	1	1	1	1	1	1	1	1	1	1
GSM37042	3	3	3	3	3	3	3	3	3	2	4	3	3	3	2	3	3	3	4	3	4	3	3	5	3
GSM37043	5	5	5	5	5	5	5	5	5	2	5	5	5	5	5	5	5	5	5	5	5	5	5	5	5
GSM37044	INC	1	3	3	2	1	1	1	3	2	1	3	1	1	1	1	5	3	3	3	1	1	1	3	3
GSM37045	5	5	5	5	5	5	5	5	5	2	3	5	5	5	5	3	5	3	5	5	3	5	5	3	5
GSM37046	2	2	2	2	2	2	2	2	2	2	1	2	1	2	2	2	2	2	1	2	1	2	1	2	1
GSM37047	5	5	5	5	5	5	5	5	5	2	3	5	5	5	5	5	5	3	4	5	3	5	5	5	5
GSM37048	5	5	5	5	5	5	4	4	5	5	4	5	5	5	5	5	5	5	4	5	4	4	5	1	5
GSM37049	INC	1	1	1	2	2	2	2	2	1	2	1	2	1	2	1	1	1	2	1	2	2	1	2	1
GSM37051	5	4	4	4	5	5	5	4	5	4	4	4	5	5	5	4	5	5	4	4	4	5	5	5	5
GSM37052	INC	5	4	4	4	5	4	4	3	2	4	5	5	5	5	5	5	5	4	4	4	4	1	5	5
GSM37054	3	3	3	3	2	2	2	3	3	2	1	3	5	3	2	3	3	3	3	3	1	2	3	3	3
GSM37055	2	3	3	3	2	2	2	3	3	2	2	2	2	2	2	2	2	2	2	3	2	2	2	2	1
GSM37056	1	4	4	4	4	1	1	1	4	1	1	1	1	1	1	1	1	1	1	4	1	1	1	1	1
GSM37057	2	2	2	2	2	2	2	2	1	2	2	2	1	2	2	2	2	2	2	2	2	2	2	2	1
GSM37058	1	1	1	1	2	2	2	2	1	1	1	1	2	1	2	1	1	2	1	1	1	2	1	2	1
GSM37059	1	1	1	1	1	1	1	1	1	1	2	1	1	1	1	1	1	1	1	1	2	1	1	1	1
GSM37060	1	1	4	4	4	1	1	1	1	1	1	1	1	1	1	1	1	1	1	4	1	1	1	1	1
GSM37061	1	1	1	1	1	1	1	1	1	1	1	1	1	1	1	1	1	2	1	1	1	1	1	2	1
GSM37062	2	2	2	2	2	2	2	2	2	2	2	2	2	2	2	2	2	2	2	2	2	2	2	2	2
GSM50034	2	2	3	3	2	2	2	2	2	2	2	2	2	2	2	3	2	2	2	3	2	2	2	5	2
GSM50035	5	5	5	5	5	5	5	5	5	5	5	5	5	5	5	5	5	5	5	5	5	5	5	5	5
GSM50036	2	2	2	2	2	2	2	2	2	2	2	2	2	2	2	2	2	2	2	2	2	2	2	2	2
GSM50037	2	2	2	2	2	2	2	2	2	2	2	2	2	2	2	2	2	2	2	2	2	2	2	2	2
GSM50038	2	2	2	2	2	2	2	2	2	2	2	2	2	2	2	2	2	2	2	2	2	2	2	2	1
GSM50039	2	2	2	2	2	2	2	2	2	2	2	2	2	2	2	2	2	2	2	2	2	2	2	2	2
GSM50040	5	5	5	5	5	5	5	5	5	5	5	5	5	5	5	5	5	5	5	5	5	5	5	5	5
GSM50041	5	5	5	5	5	5	5	5	5	5	5	5	5	5	5	5	5	5	5	5	5	5	5	5	5
GSM50042	5	5	5	5	5	5	5	5	5	2	2	2	2	5	5	5	1	5	4	5	2	5	5	2	1
GSM50043	2	2	2	2	2	2	2	2	2	2	2	2	2	2	2	2	2	2	2	2	2	2	2	2	2
GSM50044	2	2	2	2	2	2	2	2	2	2	2	2	1	2	2	2	2	2	2	2	2	2	2	2	1
GSM50045	5	5	5	5	5	5	5	5	5	5	4	5	5	5	5	5	5	5	4	5	4	5	5	5	5
GSM50046	5	5	5	5	5	5	5	5	5	5	5	5	5	5	5	5	5	5	5	5	5	5	5	5	5
GSM50047	2	1	1	1	2	2	2	1	1	2	2	2	2	2	1	2	1	2	1	1	2	2	1	2	1
GSM50048	5	5	5	5	5	5	5	5	5	5	4	5	5	5	5	5	5	5	4	5	4	5	5	5	5
GSM50049	1	1	1	1	1	1	1	1	1	1	1	1	1	1	1	1	1	1	1	1	1	1	1	1	1
GSM50050	5	5	5	5	5	5	5	5	5	5	4	5	5	5	5	5	5	5	3	5	4	5	5	5	5
GSM50051	1	4	4	4	4	1	1	1	1	1	1	1	1	1	1	1	1	1	1	4	1	1	1	1	1
GSM50052	5	5	5	5	5	5	5	5	5	5	4	5	5	5	5	5	5	5	4	5	4	5	5	5	5
GSM50053	1	1	2	2	2	1	1	1	1	2	1	1	1	1	1	1	1	2	1	2	1	1	1	2	1
GSM50054	5	5	5	5	5	5	5	5	5	3	5	5	5	5	5	5	5	5	5	5	5	5	5	5	5
GSM50055	5	5	5	5	5	5	5	5	5	5	4	5	5	5	5	5	3	5	3	5	4	5	5	5	5
GSM50056	2	2	2	2	2	2	2	2	2	2	2	2	2	2	2	2	2	2	2	2	2	2	2	1	2
GSM50057	5	5	5	5	5	5	5	5	5	5	5	5	5	5	5	5	5	5	5	5	5	5	5	5	5
GSM50058	INC	3	4	4	4	3	3	5	4	2	4	5	3	5	5	3	5	3	3	4	4	3	3	5	5
GSM50059	2	2	2	2	2	2	2	2	2	2	2	2	2	2	2	2	2	2	2	2	2	2	2	2	2
GSM50060	3	3	3	3	2	2	2	2	2	2	3	3	3	2	2	3	3	3	3	3	3	2	3	5	3
GSM50061	INC	3	4	4	4	4	3	5	4	2	4	5	3	4	5	3	3	3	4	4	4	3	3	5	5
GSM50062	2	2	2	2	2	2	2	2	2	2	2	2	2	2	2	2	2	2	2	2	2	2	2	2	2
GSM50063	5	5	5	5	5	5	5	5	5	3	4	5	5	5	5	5	5	5	3	5	4	5	5	3	5
GSM50064	4	4	4	4	4	4	4	4	4	2	4	4	4	5	5	4	5	4	4	4	4	4	5	4	5
GSM50065	2	1	2	2	2	2	2	2	1	1	2	1	2	2	2	2	2	2	2	2	2	2	1	1	1
GSM50066	INC	2	4	4	4	2	3	3	4	1	4	4	3	2	2	3	3	3	3	4	4	3	3	5	5
GSM50067	5	5	5	5	5	5	5	5	5	5	5	5	5	5	5	5	5	5	5	5	5	5	5	5	5
GSM50068	1	1	1	1	1	1	1	2	1	2	2	1	2	2	1	2	1	2	3	1	2	1	1	2	1
GSM50069	5	5	5	5	5	5	5	4	4	2	4	5	5	5	5	5	5	5	4	5	4	5	5	5	5
GSM50070	3	3	3	3	3	3	3	3	3	3	3	3	3	3	3	3	5	3	3	3	3	3	3	5	3
GSM50071	INC	3	3	3	4	4	3	3	3	3	5	1	3	3	1	1	1	1	1	3	5	3	1	3	1
GSM50072	3	3	3	3	4	4	3	1	1	2	4	3	3	3	1	3	5	3	4	3	4	3	1	3	3
GSM50073	5	5	5	5	4	5	5	5	5	2	5	5	5	5	5	5	5	5	5	5	5	5	5	5	5
GSM50074	1	1	4	4	1	1	1	1	1	1	1	1	1	1	1	1	1	1	1	4	1	1	1	1	1
GSM50075	INC	1	4	4	4	4	1	1	4	1	4	5	3	1	1	1	3	3	3	4	4	1	3	3	5
GSM50076	1	1	1	1	1	1	1	1	1	1	1	1	1	1	1	1	1	2	1	1	1	1	1	2	1
GSM50077	1	1	1	1	1	1	1	1	1	1	1	1	1	1	1	1	1	2	1	1	1	1	1	2	1
GSM50078	5	3	5	5	5	5	5	5	5	2	4	5	5	5	5	4	5	5	4	5	4	5	5	5	5
GSM50079	5	5	5	5	5	5	5	5	5	5	5	5	5	5	5	5	5	5	5	5	5	5	5	5	5
GSM50080	1	1	1	1	1	1	1	1	1	1	1	1	1	1	1	1	2	1	1	1	1	1	1	1	1
GSM50081	1	1	1	1	1	1	1	1	1	1	1	1	1	1	1	1	1	2	1	1	1	1	1	2	1
GSM50082	1	4	4	4	4	4	1	1	4	1	4	1	1	1	1	1	1	4	4	4	4	1	1	1	1
GSM50083	2	2	2	2	2	1	2	2	2	2	2	2	2	2	1	2	2	2	2	2	2	2	2	2	1
GSM50084	2	2	2	2	2	2	2	2	2	2	2	2	2	1	2	1	2	1	2	2	2	2	2	2	2
GSM50085	2	2	2	2	2	2	2	2	2	2	2	2	2	2	2	2	2	2	2	2	2	2	2	2	2
GSM50086	2	2	2	2	2	2	2	2	2	2	3	2	2	2	2	2	2	2	2	2	3	2	2	2	2
GSM50087	2	2	2	2	2	2	2	2	2	2	2	2	2	2	2	2	2	2	2	2	2	2	2	2	1
GSM50088	1	4	4	4	4	1	1	1	1	1	1	1	1	1	1	1	1	4	1	4	1	1	1	1	1
GSM50089	4	4	4	4	4	4	4	4	4	1	4	4	1	4	4	4	1	4	4	4	4	4	4	4	1
GSM50090	1	1	2	2	2	1	2	2	1	2	1	1	1	1	2	1	2	1	1	2	1	2	1	2	1
GSM50091	2	2	2	2	2	2	2	2	2	2	2	2	2	2	2	2	2	2	2	2	2	2	2	1	2
GSM50092	2	2	3	3	2	2	2	2	2	2	2	2	2	2	2	2	2	2	2	3	2	2	2	2	2
GSM50093	5	5	5	5	5	5	5	5	5	5	5	5	5	5	5	5	5	5	5	5	5	5	5	5	5
GSM50094	5	5	5	5	5	5	5	5	5	5	5	5	5	5	5	5	5	5	5	5	5	5	5	5	5
GSM50095	2	1	2	2	2	2	2	1	1	1	2	2	2	1	1	1	2	1	2	2	2	2	1	2	1
GSM50096	5	5	5	5	5	5	5	5	5	2	4	5	5	5	5	5	5	5	3	5	4	5	5	5	5
GSM50097	2	2	2	2	2	2	2	2	2	2	1	1	2	2	1	2	1	2	1	2	1	2	1	2	1
GSM50098	1	1	1	1	1	1	1	1	1	1	1	1	1	1	1	1	1	1	1	1	1	1	1	2	1
GSM50099	2	2	2	2	2	2	2	2	2	2	2	2	2	2	2	2	2	1	2	2	2	2	2	3	1
GSM50100	1	4	4	4	4	1	1	1	1	1	1	1	1	1	1	1	1	4	1	4	1	1	1	1	1
GSM50101	2	1	2	2	2	2	2	1	2	1	1	2	1	2	2	2	2	2	2	2	1	2	2	2	1
GSM50102	5	5	5	5	5	5	5	5	5	5	5	5	5	5	5	5	5	5	5	5	5	5	5	5	5
GSM50103	5	5	5	5	5	5	5	5	5	1	3	5	5	5	5	5	5	3	3	5	3	5	5	5	5
GSM50105	2	2	2	2	2	2	2	2	2	1	2	2	1	1	2	2	2	1	2	2	2	2	2	2	1
GSM50106	5	3	5	5	5	5	5	5	5	3	5	5	5	5	5	5	3	5	5	5	5	5	5	5	5
GSM50107	5	5	5	5	5	5	5	5	5	5	5	5	5	5	5	5	5	5	5	5	5	5	5	5	5
GSM50109	2	1	1	1	2	2	2	2	2	2	2	1	2	1	2	2	1	2	2	1	2	2	2	2	1
GSM50110	INC	3	4	4	4	2	2	2	3	2	2	2	2	5	5	5	1	5	1	4	2	2	5	5	1
GSM50111	1	1	1	1	2	2	2	1	1	1	1	1	2	1	1	1	1	2	1	1	1	2	1	2	1
GSM50112	5	5	5	5	5	5	5	5	5	5	5	5	5	5	5	5	1	5	5	5	5	5	5	5	5
GSM50113	1	1	1	1	1	1	1	1	1	1	1	1	1	1	1	1	1	1	1	1	1	1	1	2	1
GSM50115	2	1	2	2	2	2	2	2	2	1	1	1	1	1	2	2	2	2	1	2	1	2	2	2	1
GSM50116	1	4	4	4	4	1	1	1	1	1	1	1	1	1	1	1	1	1	1	4	1	1	1	1	1
GSM50117	2	2	2	2	2	2	2	2	2	2	2	2	2	2	2	2	2	2	2	2	2	2	2	3	2
GSM50118	2	2	2	2	2	2	2	2	2	2	2	2	1	2	2	2	2	2	2	2	2	2	2	2	2
GSM50119	5	5	5	5	5	5	5	5	5	5	5	5	5	5	5	5	5	5	5	5	5	5	5	5	5
GSM50120	1	2	1	1	2	1	1	1	2	2	1	1	1	1	1	2	1	1	1	1	1	1	1	1	2
GSM50121	2	2	2	2	2	2	2	2	2	1	2	1	2	2	2	1	2	2	1	2	2	2	2	2	2
GSM50122	2	2	2	2	2	2	2	2	2	2	1	2	1	2	2	2	1	2	2	2	1	2	1	1	2
GSM50123	5	5	5	5	5	5	5	5	5	2	5	5	5	5	5	5	3	5	5	5	5	5	5	5	5
GSM50124	1	1	2	2	2	1	1	1	1	1	1	1	1	1	1	1	2	2	1	2	1	1	1	2	1
GSM50125	3	3	3	3	3	3	3	3	3	3	3	3	3	3	2	3	3	3	3	3	3	3	3	3	3
GSM50126	1	2	1	1	1	1	1	2	1	1	1	1	2	1	2	2	2	1	1	1	1	1	2	2	1
GSM50127	2	3	3	3	2	2	2	2	4	2	2	2	2	1	2	2	2	2	2	3	2	2	2	2	1
GSM50128	2	2	2	2	2	2	2	2	2	1	2	2	1	2	2	1	2	2	2	2	2	2	2	2	1
GSM50129	2	2	2	2	2	2	2	2	2	2	1	1	2	2	2	2	1	2	1	2	1	2	1	2	1
GSM50130	3	3	3	3	4	2	2	5	3	3	3	3	3	3	5	3	3	3	3	3	3	2	3	5	3
GSM50131	2	2	2	2	2	2	2	2	2	2	2	2	2	2	2	2	2	2	2	2	2	2	2	1	2
GSM505342	3	3	3	3	3	3	2	3	3	2	3	3	3	3	2	3	3	3	3	3	3	2	3	5	3
GSM505350	INC	2	3	3	2	2	2	2	3	2	4	3	3	2	2	1	5	3	4	3	4	2	1	3	3
GSM505377	3	3	3	3	3	3	3	3	3	3	3	3	3	3	2	3	3	3	3	3	3	3	3	5	3
GSM505379	2	2	2	2	2	2	2	2	2	2	2	2	2	2	2	2	2	2	2	2	2	2	2	1	1
GSM505381	3	3	3	3	3	3	3	3	3	2	1	3	3	3	3	3	5	3	3	3	1	3	3	5	3
GSM505383	1	1	1	1	1	1	1	1	2	1	2	1	1	1	1	1	2	1	1	1	1	1	1	1	1
GSM505385	2	3	3	3	2	2	2	2	2	2	2	2	2	3	2	2	2	2	2	3	2	2	3	2	2
GSM505387	3	3	3	3	3	3	3	3	3	2	3	3	3	3	3	3	3	3	3	3	3	3	3	3	3
GSM505389	2	2	2	2	2	2	2	2	2	2	2	2	2	2	2	2	2	2	2	2	2	2	2	2	2
GSM505391	2	2	2	2	2	2	2	2	2	2	1	2	2	1	2	2	2	2	2	2	1	2	2	2	2
GSM505393	2	2	2	2	2	2	2	1	2	2	2	2	1	2	2	2	2	2	2	2	2	2	2	2	1
GSM505395	2	2	2	2	2	2	2	2	2	2	2	2	2	2	2	2	2	2	2	2	2	2	2	2	2
GSM505399	2	2	2	2	2	2	2	2	2	2	1	1	2	2	2	2	1	1	2	2	1	2	1	2	1
GSM505401	3	3	3	3	3	3	3	3	2	2	3	3	3	3	2	3	3	3	3	3	3	3	3	5	3
GSM505403	1	1	1	1	1	1	1	1	1	1	1	1	1	1	1	1	1	1	1	1	1	1	1	1	1
GSM505405	2	1	2	2	2	2	2	2	2	1	2	2	1	2	2	2	2	2	2	2	2	2	2	2	1
GSM505407	1	1	1	1	2	2	1	1	2	2	2	2	1	2	2	1	1	2	1	1	2	1	1	2	1
GSM505409	2	2	2	2	2	2	2	2	2	2	2	2	2	2	2	2	2	2	2	2	2	2	2	2	2
GSM505413	5	5	5	5	5	5	5	5	5	5	4	5	5	5	5	5	5	5	4	5	4	5	5	3	5
GSM505427	2	2	2	2	2	2	2	2	2	2	2	2	2	2	2	2	2	2	2	2	2	2	1	2	2
GSM505428	5	5	5	5	5	5	5	5	5	2	5	5	5	5	5	5	5	5	5	5	5	5	5	5	5
GSM505429	1	1	1	1	1	2	1	1	1	1	1	1	1	1	1	1	1	1	1	1	1	1	1	2	1
GSM505430	2	2	2	2	2	2	2	2	2	2	2	2	2	2	2	2	2	2	2	2	2	2	2	2	1
GSM505431	2	2	2	2	2	2	2	2	2	2	2	2	2	2	2	2	2	2	2	2	2	2	2	1	2
GSM505432	1	1	4	4	4	1	1	1	2	1	1	1	1	1	1	1	1	1	1	4	1	1	1	1	1
GSM505433	1	1	1	1	2	1	1	1	1	2	1	1	1	1	1	1	1	1	1	1	1	1	1	2	1
GSM505434	3	3	3	3	3	3	3	3	3	2	4	3	3	3	3	3	3	3	3	3	4	3	3	3	3
GSM505435	INC	2	4	4	4	3	3	3	4	2	4	5	3	2	2	5	5	3	3	4	4	3	3	5	5
GSM505437	3	2	3	3	3	3	2	3	3	2	3	3	3	3	2	3	3	3	3	3	3	2	3	3	3
GSM505438	5	5	5	5	5	5	5	5	5	5	5	5	5	5	5	5	5	5	5	5	5	5	5	5	5
GSM505439	INC	3	4	4	4	3	3	5	4	2	4	5	3	2	5	3	5	3	3	4	4	3	3	5	5
GSM505440	1	1	4	4	1	1	1	1	2	1	1	1	1	1	1	1	1	2	1	4	1	1	1	1	1
GSM505441	2	2	2	2	2	2	2	2	2	2	2	2	2	2	2	2	2	2	2	2	2	2	2	2	1
GSM505442	2	2	2	2	2	2	2	2	2	2	2	2	2	2	2	2	2	2	2	2	2	2	2	2	2
GSM505443	1	1	1	1	1	1	1	1	1	1	1	1	1	1	1	1	1	1	1	1	1	1	1	2	1
GSM505444	2	2	2	2	2	2	2	2	2	2	2	2	2	2	2	2	2	2	2	2	2	2	2	2	1
GSM505445	3	3	3	3	3	3	3	3	3	2	3	3	3	3	3	3	3	3	3	3	3	3	3	3	3
GSM505446	1	1	1	1	2	1	1	1	1	2	1	1	1	1	1	1	1	1	1	1	1	1	1	2	1
GSM505447	3	3	3	3	3	3	2	2	3	2	3	3	3	3	2	3	3	3	4	3	3	2	3	3	3
GSM505448	1	1	1	1	1	1	1	1	1	1	1	1	1	1	1	1	1	1	1	1	1	1	1	1	1
GSM505449	2	2	2	2	2	2	2	2	1	1	2	2	2	2	2	2	2	1	2	2	2	2	2	1	1
GSM505450	2	3	3	3	3	2	2	3	3	3	2	2	2	3	2	2	2	2	2	3	2	2	2	3	2
GSM505451	1	1	1	1	2	2	1	1	1	1	1	1	2	1	1	1	2	2	1	1	1	1	1	2	1
GSM505452	2	1	2	2	2	2	2	1	2	2	1	1	1	2	2	2	2	1	1	2	1	2	1	2	1
GSM505453	2	2	2	2	2	2	2	2	2	2	2	1	2	2	2	2	2	1	2	2	2	2	2	2	2
GSM505454	5	5	5	5	5	5	5	5	5	5	5	5	5	5	5	5	5	5	5	5	5	5	5	5	5
GSM505455	2	2	2	2	2	2	2	2	2	2	2	2	2	2	2	2	2	2	2	2	2	2	2	2	2
GSM505456	2	2	2	2	2	2	2	2	1	2	2	2	2	2	2	2	2	2	2	2	2	2	2	2	1
GSM505457	2	2	2	2	2	2	2	2	2	2	2	2	2	2	2	2	2	2	2	2	2	2	2	2	2
GSM505458	1	4	4	4	4	4	1	1	1	1	1	1	1	1	1	1	1	1	1	4	1	1	1	1	1
GSM505459	2	2	2	2	2	2	2	2	2	2	2	2	2	2	2	3	2	2	2	2	2	2	2	2	2
GSM505460	5	5	5	5	5	5	5	5	5	5	5	5	5	5	5	5	5	5	5	5	5	5	5	5	5
GSM505461	2	2	2	2	2	2	2	2	2	2	2	2	2	2	2	2	2	2	2	2	2	2	2	2	2
GSM505462	5	5	5	5	5	5	5	5	5	5	5	5	5	5	5	5	5	5	5	5	5	5	5	5	5
GSM505463	2	2	2	2	2	2	2	2	2	2	2	2	2	2	2	2	2	5	2	2	2	2	2	2	2
GSM505464	1	1	1	1	1	1	1	1	1	1	1	1	1	1	1	1	1	1	1	1	1	1	1	1	1
GSM505465	2	1	1	1	2	2	2	1	1	1	1	2	2	2	2	1	2	2	2	1	1	2	2	2	1
GSM505466	5	5	5	5	5	5	5	5	5	5	4	5	5	5	5	5	5	5	4	5	4	5	5	5	5
GSM505467	5	5	5	5	5	5	5	5	5	5	4	5	5	5	5	5	5	5	4	5	4	5	5	5	5
GSM505468	2	2	2	2	2	2	2	2	2	1	2	2	2	1	2	2	2	1	2	2	2	2	2	1	1
GSM505469	INC	2	1	1	2	2	2	2	1	1	1	1	2	2	2	2	1	2	1	1	1	2	1	2	1
GSM505471	2	2	2	2	2	2	2	2	2	2	2	2	2	2	2	2	2	2	2	2	2	2	2	2	2
GSM505472	1	1	1	1	1	1	1	1	1	1	1	1	1	1	1	1	1	1	1	1	1	1	1	1	1
GSM505473	2	2	2	2	2	2	2	2	2	2	2	2	2	2	2	2	2	2	2	2	2	2	2	2	2
GSM505474	2	2	2	2	2	2	2	2	2	2	2	2	2	2	2	2	2	2	2	2	2	2	2	2	2
GSM505475	5	5	5	5	5	5	5	5	5	5	4	5	5	4	5	5	5	5	4	5	4	5	5	5	5
GSM505476	2	2	2	2	2	2	2	2	2	2	2	2	2	2	2	2	2	2	2	2	2	2	2	2	2
GSM505477	2	2	2	2	2	2	2	2	1	2	1	2	1	2	2	2	2	1	2	2	1	2	2	1	1
GSM505478	4	4	4	4	4	4	4	4	3	1	4	1	4	4	4	1	5	5	1	4	4	4	4	1	1
GSM505479	2	2	2	2	2	2	2	2	2	2	2	2	2	2	2	2	2	2	2	2	2	2	2	2	2
GSM505480	2	2	2	2	2	2	2	2	2	2	2	2	2	2	2	2	2	2	2	2	2	2	2	2	2
GSM505481	2	2	2	2	2	2	2	2	2	2	2	2	2	2	2	2	2	1	2	2	2	2	2	2	1
GSM505482	INC	1	1	1	2	2	2	2	2	2	2	1	2	1	2	1	1	1	4	1	2	2	1	1	1
GSM505483	2	2	2	2	2	2	2	2	2	2	2	2	2	2	2	2	2	1	2	2	2	2	2	1	1
GSM505484	2	2	1	1	2	2	2	2	2	2	2	2	2	1	2	2	2	2	2	1	2	2	2	2	1
GSM505485	2	2	2	2	2	2	2	2	2	2	2	2	2	2	2	2	2	2	2	2	2	2	2	2	1
GSM505486	2	2	2	2	2	2	2	2	2	2	2	2	2	2	2	2	2	2	2	2	2	2	2	2	1
GSM505487	3	3	3	3	4	3	3	3	3	2	3	3	3	3	2	3	3	3	3	3	3	3	3	3	3
GSM505488	1	1	1	1	2	2	1	1	2	1	1	1	1	2	2	1	2	2	1	1	1	1	1	2	1
GSM505490	INC	5	5	5	4	3	5	5	3	2	4	5	3	5	2	5	5	3	4	5	4	5	3	3	5
GSM505503	5	5	5	5	5	5	5	5	5	2	5	5	5	5	5	5	3	5	5	5	5	5	5	5	5
GSM505504	INC	3	5	5	5	5	5	5	5	3	3	3	5	4	5	3	3	5	4	5	3	5	3	3	3
GSM505505	3	3	3	3	3	3	2	3	3	2	3	3	3	3	2	3	3	2	3	3	3	2	3	3	3
GSM505506	INC	1	2	2	1	2	1	1	1	2	1	2	1	2	1	1	2	2	2	2	1	1	2	2	1
GSM505507	1	4	4	4	4	4	1	1	1	1	1	1	1	1	1	1	1	1	1	4	1	1	1	1	1
GSM505508	1	4	4	4	4	4	1	1	4	1	1	1	1	1	1	1	1	5	1	4	1	1	1	1	1
GSM505509	1	1	1	1	1	1	1	1	1	2	1	1	1	1	1	1	1	1	1	1	1	1	1	1	1
GSM505510	2	2	2	2	4	2	2	2	2	2	1	2	1	2	2	2	2	5	2	2	1	2	2	2	1
GSM505511	3	3	3	3	3	3	3	3	3	2	1	3	3	3	3	3	3	3	3	3	1	3	3	5	3
GSM505512	1	1	1	1	1	1	1	1	2	2	1	1	1	1	1	1	2	1	1	1	1	1	1	1	1
GSM505513	5	5	5	5	5	5	5	5	5	3	5	5	5	5	5	5	5	5	5	5	5	5	5	5	5
GSM505514	5	5	5	5	5	5	5	5	5	2	3	5	5	5	5	5	5	3	4	5	3	5	5	5	5
GSM505515	1	1	1	1	1	1	1	1	2	2	1	1	1	1	1	1	1	2	1	1	1	1	1	2	1
GSM505516	5	5	5	5	5	5	5	5	5	2	5	5	5	5	5	5	5	5	5	5	5	5	5	5	5
GSM505517	1	4	4	4	4	4	4	4	1	1	1	1	1	1	1	1	1	5	1	4	1	4	1	1	1
GSM505518	2	2	3	3	5	5	2	2	2	2	2	2	2	2	2	2	2	5	2	3	2	2	2	5	2
GSM505519	2	2	2	2	2	2	2	2	2	2	2	2	1	2	2	2	2	2	2	2	2	2	2	2	1
GSM505520	1	1	1	1	1	1	1	1	1	1	1	1	1	1	1	1	1	1	1	1	1	1	1	1	1
GSM505521	3	3	3	3	3	3	3	3	3	3	3	3	3	3	3	3	3	3	3	3	3	3	3	3	3
GSM505522	2	2	2	2	2	2	2	2	2	2	2	2	2	2	2	2	2	2	2	2	2	2	2	2	1
GSM505523	1	4	4	4	1	1	1	1	1	1	1	1	1	1	1	1	1	1	1	4	1	1	1	4	1
GSM505524	3	3	3	3	3	3	3	3	3	3	4	3	3	3	3	3	3	3	3	3	4	3	3	3	3
GSM505525	INC	2	4	4	4	2	2	2	2	1	1	1	1	2	2	3	1	5	2	4	1	2	1	2	1
GSM505526	3	3	3	3	3	3	2	3	3	3	3	3	3	3	2	3	5	3	3	3	3	2	3	5	3
GSM505527	3	3	5	5	3	3	3	3	3	2	3	3	3	3	3	3	5	3	4	5	3	3	3	5	3
GSM505528	5	5	5	5	4	5	5	5	5	5	4	5	5	5	5	5	5	5	3	5	4	5	5	5	5
GSM505529	1	1	1	1	1	1	1	1	1	1	1	1	1	1	1	1	1	1	1	1	1	1	1	2	1
GSM505530	1	1	1	1	1	1	1	1	2	1	1	1	1	1	1	1	2	1	1	1	1	1	1	1	1
GSM505531	3	3	3	3	4	3	3	3	3	2	4	3	3	3	2	3	3	3	3	3	4	3	3	3	5
GSM505532	2	2	2	2	2	2	2	2	2	2	2	2	1	2	2	2	2	2	2	2	2	2	2	2	1
GSM505533	4	4	4	4	4	5	4	4	4	2	4	5	5	5	5	5	5	5	4	4	4	4	4	5	5
GSM505534	3	3	3	3	4	5	3	3	3	2	3	3	3	5	2	3	5	3	3	3	3	3	3	3	3
GSM505535	5	5	5	5	5	5	5	5	5	5	5	5	5	5	5	5	5	5	5	5	5	5	5	5	5
GSM505536	4	4	4	4	4	4	4	4	4	4	1	4	1	1	4	4	1	4	4	4	1	4	4	4	1
GSM505537	INC	4	4	4	4	4	1	4	1	1	2	2	2	1	1	1	1	1	4	4	2	1	3	3	1
GSM505538	1	1	1	1	1	1	1	1	1	2	1	1	1	1	1	1	1	1	1	1	1	1	1	2	1
GSM505539	1	1	1	1	1	1	1	1	1	1	1	1	1	1	1	1	1	1	1	1	1	1	1	1	1
GSM505540	5	5	5	5	5	5	5	5	5	2	4	5	5	5	5	5	5	5	4	5	4	5	5	5	5
GSM505541	5	5	5	5	5	5	5	5	5	1	5	5	5	5	5	5	5	5	5	5	5	5	5	5	5
GSM505542	2	2	2	2	2	2	2	2	2	2	2	2	2	2	2	2	2	2	2	2	2	2	2	2	1
GSM505543	5	5	5	5	5	5	5	5	5	5	5	5	5	5	5	5	5	5	5	5	5	5	5	5	5
GSM505544	1	1	1	1	2	2	1	1	1	2	1	2	1	1	1	2	1	1	2	1	1	1	1	2	1
GSM505545	5	5	5	5	5	5	5	5	5	2	5	5	5	5	5	5	5	5	5	5	5	5	5	3	5
GSM505546	3	3	3	3	3	3	3	3	3	2	3	3	3	3	3	3	3	3	3	3	3	3	3	3	3
GSM505547	2	2	2	2	2	2	2	2	1	2	2	2	1	2	2	2	2	2	2	2	2	2	2	2	1
GSM505548	5	5	5	5	5	5	4	4	4	2	4	5	5	5	5	5	5	5	4	5	4	4	5	3	5
GSM505549	1	1	4	4	4	4	1	1	1	1	1	1	1	1	1	1	1	1	1	4	1	1	1	2	1
GSM505550	1	1	1	1	1	1	1	1	1	1	2	1	1	1	1	1	2	1	1	1	1	1	1	1	1
GSM505551	1	1	1	1	4	1	1	1	2	1	1	1	1	1	1	1	2	5	2	1	1	1	1	2	1
GSM505552	5	5	5	5	5	2	5	5	5	2	4	5	5	2	5	5	5	5	3	5	4	5	5	3	5
GSM505553	5	5	5	5	4	5	5	5	5	2	5	5	5	5	5	5	5	5	5	5	5	5	5	5	5
GSM505554	INC	3	5	5	4	3	5	5	2	2	3	5	5	5	2	5	3	3	3	5	3	5	3	3	5
GSM505555	5	5	5	5	5	5	5	5	5	5	4	5	4	5	5	5	5	5	3	5	4	5	5	5	5
GSM505556	2	2	2	2	2	2	2	2	2	2	1	2	1	2	2	2	2	1	2	2	1	2	2	2	1
GSM505557	1	1	1	1	1	2	1	1	2	1	1	1	1	2	1	1	2	1	2	1	1	1	2	2	1
GSM505558	INC	4	3	3	4	3	3	3	1	2	4	5	3	5	1	3	1	5	4	3	4	3	3	3	3
GSM505559	2	2	2	2	2	2	2	2	2	2	2	2	2	2	2	2	2	2	2	2	2	2	2	1	2
GSM505560	2	2	2	2	2	2	2	2	2	2	2	2	2	2	2	2	2	2	2	2	2	2	2	2	2
GSM505561	5	5	5	5	5	5	5	5	5	5	5	5	5	5	5	5	5	4	5	5	5	5	5	5	5
GSM505562	5	5	5	5	5	5	5	5	5	2	5	5	5	5	5	5	5	5	5	5	5	5	5	5	5
GSM505563	5	5	5	5	5	5	5	5	5	2	4	5	4	4	5	5	5	5	4	5	4	5	5	3	5
GSM505564	5	5	5	5	5	5	5	5	5	5	5	5	5	5	5	5	5	5	5	5	5	5	5	5	5
GSM505565	2	1	1	1	2	2	2	1	2	2	1	2	1	2	2	2	2	2	2	1	1	2	2	2	1
GSM505566	5	5	5	5	5	5	5	5	5	5	5	5	5	5	5	5	5	5	5	5	5	5	5	5	5
GSM505567	2	2	2	2	2	2	2	2	2	2	2	2	2	2	2	2	2	2	2	2	2	2	2	2	1
GSM505568	2	2	2	2	2	2	2	2	2	2	2	2	2	2	2	2	2	2	2	2	2	2	2	1	1
GSM505569	1	1	1	1	1	1	1	1	1	1	1	1	1	1	1	1	1	1	1	1	1	1	1	1	1
GSM505570	3	3	3	3	3	3	3	3	3	2	1	3	3	3	2	3	3	3	3	3	1	3	3	3	3
GSM505571	2	2	2	2	2	2	2	2	2	2	2	2	2	2	2	2	2	2	2	2	2	2	2	2	2
GSM505572	5	5	5	5	5	5	5	5	5	5	4	5	5	5	5	4	5	5	4	5	4	5	5	5	5
GSM505573	2	2	2	2	2	2	2	2	2	2	2	2	2	2	2	2	2	2	2	2	2	2	2	2	2
GSM505574	5	3	5	5	5	5	5	5	5	3	5	5	5	3	5	5	3	5	5	5	5	5	5	5	5
GSM505575	5	5	5	5	5	5	5	5	5	5	5	5	5	5	5	5	5	5	5	5	5	5	5	3	5
GSM505576	2	2	2	2	2	2	1	1	2	2	1	2	1	2	1	2	2	2	2	2	1	1	2	2	1
GSM505577	2	2	2	2	2	2	2	2	2	2	2	2	2	2	2	2	2	2	2	2	2	2	2	2	2
GSM505578	1	1	1	1	1	1	1	1	1	1	1	1	1	1	1	1	1	1	1	1	1	1	1	1	1
GSM505579	2	1	1	1	2	2	2	1	2	2	2	2	1	2	2	1	2	2	2	1	2	2	2	2	1
GSM505580	5	5	5	5	5	5	5	5	4	5	4	5	5	5	5	5	5	5	4	5	4	5	5	5	5
GSM505581	1	1	1	1	1	1	1	1	1	1	1	1	1	1	1	1	1	1	1	1	1	1	1	2	1
GSM505582	2	2	2	2	2	2	2	2	2	2	2	2	1	2	2	2	2	2	2	2	2	2	2	1	2
GSM505583	5	5	5	5	5	5	5	5	5	5	5	5	5	5	5	5	5	5	5	5	5	5	5	5	5
GSM505584	5	5	5	5	5	5	5	5	5	5	5	5	5	5	5	5	5	5	5	5	5	5	5	5	5
GSM505585	2	2	2	2	2	2	2	2	2	2	2	2	2	2	2	2	2	2	2	2	2	2	2	2	2
GSM505586	3	3	3	3	3	4	3	3	3	2	4	3	3	3	1	3	5	3	4	3	4	3	1	5	3
GSM505587	1	1	1	1	1	1	1	1	1	1	1	1	1	1	1	1	1	1	1	1	1	1	1	1	1
GSM505588	5	5	5	5	5	5	5	5	3	1	4	5	5	5	5	5	5	5	3	5	4	5	5	5	5
GSM505589	1	1	1	1	1	1	1	1	1	1	1	1	1	1	1	1	1	1	1	1	1	1	1	1	1
GSM505590	2	2	2	2	2	2	2	2	2	2	2	2	2	2	2	2	2	2	2	2	2	2	2	1	2
GSM505591	2	2	2	2	2	2	2	2	2	2	2	2	2	2	2	2	2	2	2	2	2	2	2	2	2
GSM505592	5	5	5	5	5	5	5	5	5	3	3	5	3	5	5	5	5	3	3	5	3	5	5	5	5
GSM505593	2	2	2	2	2	2	2	2	1	1	2	2	1	2	2	2	2	1	2	2	2	2	2	2	1
GSM505594	2	2	2	2	4	2	2	2	2	2	2	2	2	2	2	3	1	5	2	2	2	2	2	2	1
GSM505595	1	1	1	1	1	1	1	1	1	2	1	1	1	1	1	1	1	1	1	1	1	1	1	1	1
GSM505596	2	2	2	2	2	2	2	2	2	2	2	2	2	2	2	2	2	2	2	2	2	2	2	2	1
GSM505597	2	2	2	2	2	2	2	2	2	2	1	2	2	2	2	2	2	1	2	2	2	2	1	2	1
GSM505598	1	1	1	1	1	1	1	1	1	1	1	1	1	1	1	1	1	1	1	1	1	1	1	1	1
GSM505599	1	1	1	1	4	1	1	1	1	1	2	1	1	1	1	1	1	1	1	1	2	1	1	1	1
GSM505600	1	1	4	4	1	1	1	1	2	2	1	1	1	1	1	1	1	1	1	4	1	1	1	1	1
GSM505601	2	2	2	2	2	2	2	2	2	2	1	2	2	2	2	2	2	1	2	2	1	2	2	2	1
GSM505602	2	2	2	2	2	2	2	2	2	2	2	2	2	2	2	2	2	2	2	2	2	2	2	2	2
GSM505603	1	1	1	1	1	1	1	1	1	2	2	1	1	1	1	1	2	1	1	1	2	1	1	1	1
GSM505604	2	2	2	2	2	2	2	2	2	2	2	2	1	2	2	2	2	2	2	2	2	2	2	1	1
GSM505605	2	2	2	2	2	2	2	2	2	2	2	2	2	2	2	2	2	2	2	2	2	2	2	2	2
GSM512539	4	4	4	4	4	4	4	4	4	1	4	1	1	4	4	4	1	5	4	4	4	4	1	1	1
GSM512540	4	4	4	4	4	4	4	4	4	1	4	1	1	4	4	4	1	5	4	4	4	4	1	4	1
GSM512541	4	4	4	4	4	4	4	4	1	1	4	1	1	4	4	1	1	2	1	4	4	4	1	1	1
GSM512543	4	4	4	4	4	4	4	4	4	1	4	1	1	1	4	1	1	1	4	4	4	4	1	4	1
GSM512544	4	4	4	4	4	4	4	4	4	1	4	1	1	4	4	1	1	2	4	4	4	4	1	1	1
GSM512545	4	4	4	4	4	4	4	4	4	1	4	1	1	4	4	1	1	1	4	4	4	4	1	4	1
GSM512546	4	4	4	4	4	4	4	4	4	4	4	1	1	4	4	4	1	4	1	4	4	4	1	1	1
GSM512547	4	4	4	4	4	4	4	4	4	1	4	1	1	1	4	4	1	4	4	4	4	4	1	4	1
GSM512549	4	4	4	4	4	4	4	4	4	1	4	1	1	1	4	1	1	1	4	4	4	4	1	4	1
GSM512550	4	4	4	4	4	4	4	4	4	1	4	1	1	1	4	4	1	1	4	4	4	4	1	4	1
GSM512551	1	1	4	4	1	1	1	1	1	1	1	1	1	1	1	1	1	1	1	4	1	1	1	1	1
GSM512552	4	4	4	4	4	4	4	4	4	1	4	1	1	1	4	1	1	5	4	4	4	4	1	4	1
GSM512553	4	4	4	4	4	4	4	4	4	1	1	1	1	4	4	1	1	1	1	4	1	4	1	4	1
GSM512554	4	4	4	4	4	4	4	4	4	1	4	1	1	4	4	1	1	1	4	4	4	4	1	4	1
GSM512555	4	4	4	4	4	4	4	4	4	2	4	1	1	4	4	4	1	4	4	4	4	4	1	4	1
GSM512556	4	4	4	4	4	4	4	4	4	1	4	4	5	4	5	4	5	5	4	4	4	4	1	4	5
GSM512557	4	4	4	4	4	4	4	4	4	2	4	1	1	1	4	1	1	5	1	4	4	4	1	2	1
GSM512558	4	4	4	4	4	4	4	4	4	1	4	1	1	1	4	4	1	1	1	4	4	4	4	4	1
GSM512559	INC	4	4	4	4	2	4	4	4	2	4	2	1	1	1	1	1	2	1	4	4	4	1	2	1
GSM512560	4	4	4	4	4	4	4	4	4	1	4	1	1	1	4	4	1	5	4	4	4	4	1	4	1
GSM512561	1	4	4	4	4	4	1	4	1	1	1	1	1	1	1	1	1	1	1	4	1	1	1	4	1
GSM512562	4	4	4	4	4	4	4	4	4	1	1	1	1	4	4	1	1	5	1	4	1	4	1	4	1
GSM512563	1	4	4	4	1	4	1	4	4	1	1	1	1	1	4	1	1	1	1	4	1	1	1	4	1
GSM512564	INC	4	4	4	4	4	4	4	1	1	1	1	1	1	1	4	1	5	1	4	1	4	1	4	1
GSM512565	1	4	4	4	4	4	1	1	4	1	4	1	1	1	1	1	1	1	4	4	4	1	1	1	1
GSM512566	4	4	4	4	4	4	4	4	4	1	4	1	1	4	4	4	1	4	4	4	4	4	1	4	1
GSM512567	4	4	4	4	4	4	4	4	4	1	4	1	1	1	4	4	1	1	1	4	4	4	1	4	1
GSM512568	1	4	4	4	4	4	1	1	4	1	4	1	1	1	1	1	1	1	4	4	4	1	1	1	1
GSM512569	1	4	4	4	1	4	1	1	4	1	4	1	1	1	4	1	1	1	1	4	4	1	1	1	1
GSM512570	4	4	4	4	4	4	4	4	4	1	4	1	1	4	4	4	1	5	1	4	4	4	4	1	1
GSM512571	1	1	4	4	1	1	1	1	1	1	1	1	1	1	1	1	1	1	1	4	1	1	1	1	1
GSM512572	4	4	4	4	4	4	4	4	4	1	4	1	1	1	1	1	1	5	4	4	4	4	1	4	1
GSM512573	4	4	4	4	4	4	4	4	4	1	4	1	1	1	4	1	1	1	1	4	4	4	1	1	1
GSM512574	4	4	4	4	4	4	4	4	4	1	4	1	1	4	4	4	1	4	4	4	4	4	1	4	1
GSM512575	4	4	4	4	4	4	4	4	4	1	4	1	1	1	4	1	1	1	1	4	4	4	1	2	1
GSM512576	1	4	4	4	1	4	1	1	1	1	4	1	1	1	1	1	1	1	4	4	4	1	1	1	1
GSM512577	4	4	4	4	4	4	4	4	4	1	4	1	1	4	4	4	1	1	4	4	4	4	1	4	1
GSM512578	4	4	4	4	4	4	4	4	4	1	4	4	1	4	4	4	1	4	4	4	4	4	1	1	1
GSM512579	1	4	4	4	4	4	4	4	4	1	1	1	1	1	1	1	1	1	1	4	1	4	1	4	1
GSM512580	1	4	4	4	4	4	1	4	4	1	4	1	1	1	1	1	1	1	4	4	4	1	1	1	1
GSM65316	2	2	2	2	2	1	2	2	1	2	2	2	1	2	2	2	2	2	2	2	2	2	2	2	2
GSM65317	2	2	2	2	2	2	2	2	2	2	2	2	2	2	2	2	2	2	2	2	2	2	2	2	2
GSM65318	1	1	1	1	1	1	1	1	1	1	1	1	1	1	1	1	1	1	1	1	1	1	1	1	1
GSM65319	1	1	1	1	1	1	1	1	1	1	1	1	1	1	1	1	1	1	1	1	1	1	1	1	1
GSM65320	1	1	1	1	1	1	1	1	1	1	1	1	1	1	1	1	1	1	1	1	1	1	1	1	1
GSM65321	2	2	2	2	2	2	2	2	2	2	2	2	1	2	2	2	2	2	2	2	2	2	2	2	2
GSM65322	2	2	2	2	2	2	2	2	2	2	2	2	2	2	2	2	2	2	2	2	2	2	2	2	2
GSM65323	1	1	1	1	1	1	1	1	1	1	1	1	1	1	1	1	1	1	1	1	1	1	1	1	1
GSM65324	2	2	2	2	2	2	2	2	2	2	2	2	2	2	2	2	2	2	2	2	2	2	2	2	2
GSM65325	2	2	3	3	2	2	2	2	2	2	2	2	2	3	1	2	2	2	3	3	2	2	2	1	2
GSM65326	1	1	1	1	2	2	2	1	1	1	2	1	2	1	1	1	1	2	3	1	2	2	1	1	1
GSM65327	2	2	2	2	2	2	2	2	2	2	1	2	2	2	2	2	1	2	2	2	1	2	2	2	1
GSM65328	2	2	2	2	2	2	2	2	2	2	2	2	2	2	2	2	2	2	2	2	2	2	2	2	2
GSM65329	1	1	1	1	1	1	1	1	1	1	1	1	1	1	1	1	1	1	1	1	1	1	1	1	1
GSM65330	2	2	2	2	2	2	1	1	2	1	1	2	1	2	1	2	2	2	2	2	1	1	1	2	2
GSM65331	1	1	1	1	1	1	1	1	1	1	1	1	1	1	1	1	1	1	1	1	1	1	1	1	1
GSM65332	1	1	1	1	1	1	1	1	1	1	1	1	1	1	1	1	1	1	1	1	1	1	1	1	1
GSM65333	3	3	3	3	3	3	2	3	3	2	1	3	3	3	2	3	3	3	3	3	1	2	3	1	3
GSM65334	1	1	1	1	1	1	1	1	1	1	1	1	1	1	1	1	1	2	1	1	1	1	1	2	1
GSM65335	2	2	2	2	2	2	2	2	2	2	2	2	1	2	2	2	2	2	2	2	2	2	2	2	1
GSM65336	1	1	1	1	1	1	1	1	1	2	1	1	1	1	1	1	1	2	1	1	1	1	1	2	1
GSM65337	2	2	2	2	2	2	2	2	2	2	2	2	2	2	2	2	2	2	2	2	2	2	2	2	2
GSM65338	1	1	2	2	1	1	1	1	1	1	1	2	1	2	1	2	2	2	1	2	1	1	1	2	1
GSM65339	5	5	5	5	5	5	5	5	5	5	5	5	5	5	5	5	5	5	5	5	5	5	5	1	5
GSM65340	1	1	1	1	1	2	1	1	1	1	2	2	1	1	1	1	1	1	1	1	2	1	1	1	1
GSM65341	2	2	2	2	2	2	2	2	2	2	1	2	1	2	2	2	2	2	2	2	1	2	2	2	2
GSM65342	1	1	1	1	1	1	1	1	1	2	1	1	1	1	1	1	1	2	1	1	1	1	1	1	1
GSM65343	1	4	4	4	4	2	1	1	4	1	2	1	1	1	1	1	1	1	1	4	2	1	1	1	1
GSM65344	2	2	2	2	2	2	2	2	2	2	2	2	2	2	2	2	2	2	2	2	2	2	2	2	2
GSM65345	2	2	2	2	2	2	2	2	1	1	1	2	2	2	2	1	1	2	2	2	1	2	2	2	1
GSM65346	1	1	4	4	1	1	1	1	1	1	1	1	1	1	1	1	1	1	1	4	1	1	1	1	1
GSM65347	1	1	1	1	2	1	1	1	2	1	2	2	1	1	1	1	1	1	3	1	2	1	1	2	1
GSM65348	INC	1	2	2	1	1	2	2	1	2	1	2	1	1	1	2	1	2	1	2	1	2	2	2	1
GSM65349	1	1	1	1	1	1	1	1	1	1	1	1	1	1	1	1	1	1	1	1	1	1	1	1	1
GSM65350	2	3	3	3	2	2	2	5	3	2	2	2	2	2	2	2	5	2	1	3	2	2	3	2	1
GSM65351	1	1	1	1	2	2	2	1	1	2	1	2	1	1	2	2	2	1	1	1	1	2	1	2	1
GSM65352	2	2	2	2	2	2	2	2	2	2	2	2	2	2	2	2	2	2	2	2	2	2	2	2	2
GSM65353	2	2	2	2	2	2	2	2	1	2	1	2	1	2	2	2	2	2	1	2	1	2	2	2	2
GSM65354	2	2	2	2	2	2	2	2	2	2	2	2	2	2	2	2	1	2	1	2	2	2	2	2	2
GSM65355	4	4	4	4	4	4	1	1	4	4	4	1	1	4	1	4	1	4	1	4	4	1	4	4	1
GSM65356	2	2	1	1	4	2	2	2	1	2	2	1	2	1	2	2	1	2	4	1	2	2	1	2	1
GSM65357	1	1	1	1	2	1	2	1	2	1	2	1	1	1	1	1	1	2	1	1	2	2	1	2	1
GSM65358	2	1	2	2	2	2	2	2	1	1	1	1	1	2	2	1	1	2	1	2	1	2	2	2	1
GSM65359	2	2	2	2	2	2	2	2	1	1	1	2	2	2	2	2	2	2	2	2	1	2	2	2	2
GSM65360	2	2	2	2	2	2	2	2	1	2	1	2	1	2	2	1	2	2	2	2	1	2	1	2	1
GSM65361	1	1	1	1	1	1	1	1	1	1	1	1	1	1	1	1	1	2	1	1	1	1	1	2	1
GSM65362	1	1	4	4	4	1	1	1	1	1	2	1	1	1	1	1	1	1	1	4	2	1	1	2	1
GSM65363	1	1	1	1	1	1	1	1	1	1	1	1	1	1	1	1	1	2	1	1	1	1	1	2	1
GSM65364	2	1	1	1	2	2	2	2	2	2	1	1	1	2	2	2	1	2	2	1	1	2	1	2	1
GSM65365	1	1	1	1	1	1	1	1	1	2	1	1	1	1	1	1	1	2	1	1	1	1	1	2	1
GSM65366	2	2	2	2	2	2	2	2	1	2	1	2	2	2	2	2	2	2	2	2	1	2	2	2	1
GSM65367	INC	4	4	4	4	4	2	1	1	1	2	1	2	4	1	1	5	2	4	4	2	2	4	2	1
GSM65368	1	1	1	1	1	1	1	1	1	1	1	1	1	1	1	1	1	2	1	1	1	1	1	2	1
GSM65369	2	2	2	2	2	2	2	2	2	2	2	2	2	2	2	2	2	2	2	2	2	2	2	2	2
GSM65370	2	2	2	2	2	2	2	2	2	2	2	2	2	2	2	2	2	2	2	2	2	2	2	2	2
GSM65371	2	2	2	2	2	2	2	2	2	2	2	2	2	2	2	2	2	2	2	2	2	2	2	2	2
GSM65372	2	2	2	2	2	2	2	2	2	2	2	2	2	2	2	2	2	2	2	2	2	2	2	2	2
GSM65373	2	2	2	2	2	2	2	2	1	2	2	2	2	2	2	2	1	2	2	2	2	2	2	2	1
GSM65374	2	2	2	2	2	2	2	2	2	2	2	2	2	2	2	2	2	2	2	2	2	2	2	2	2
GSM65375	2	2	2	2	2	2	2	2	2	1	1	2	2	2	2	2	2	2	2	2	1	2	2	1	2
GSM65376	1	1	1	1	2	2	2	1	1	1	1	1	1	1	1	1	1	2	1	1	1	2	1	1	1
GSM65377	2	2	2	2	2	2	2	2	2	2	2	2	2	2	2	2	2	2	2	2	2	2	2	2	2
GSM65378	INC	1	1	1	4	2	2	2	1	2	2	1	2	2	2	2	1	2	1	1	2	2	1	1	1
GSM65379	1	1	1	1	1	1	1	1	1	1	1	1	1	1	1	1	1	1	1	1	1	1	1	1	1
GSM65752	5	5	5	5	5	5	5	5	5	5	5	5	5	5	5	5	5	5	5	5	5	5	5	5	5
GSM65753	1	1	1	1	1	1	1	1	1	2	1	1	1	1	1	1	1	2	1	1	1	1	1	2	1
GSM65754	1	1	1	1	1	1	1	1	1	1	1	1	1	1	1	1	1	1	1	1	1	1	1	2	1
GSM65755	2	2	2	2	2	2	2	2	1	1	1	2	2	2	2	2	1	2	2	2	1	2	2	1	2
GSM65756	2	2	2	2	2	2	2	2	2	2	2	2	2	2	2	2	2	2	2	2	2	2	2	2	1
GSM65757	2	2	2	2	2	2	2	2	2	2	2	2	2	2	2	2	2	2	2	2	2	2	2	2	1
GSM65758	1	1	1	1	1	1	1	1	1	1	2	1	1	1	1	1	1	1	1	1	2	1	1	1	1
GSM65760	2	2	2	2	2	2	2	2	2	1	2	2	2	2	2	2	2	2	2	2	2	2	2	1	2
GSM65761	2	2	2	2	2	2	2	2	2	2	2	2	2	2	2	2	2	2	2	2	2	2	2	2	2
GSM65762	1	1	1	1	1	1	1	1	1	1	1	1	1	1	1	1	1	1	1	1	1	1	1	1	1
GSM65763	1	1	1	1	1	1	1	1	1	1	2	1	1	1	1	1	1	1	1	1	2	1	1	1	1
GSM65764	1	1	1	1	1	1	1	1	1	1	1	1	1	1	1	1	1	1	1	1	1	1	1	1	1
GSM65765	2	2	2	2	2	1	1	1	1	2	2	2	1	2	1	1	2	2	2	2	2	1	2	2	1
GSM65766	1	4	4	4	1	1	1	1	1	1	1	1	1	1	1	1	1	1	1	4	1	1	1	4	1
GSM65767	1	1	1	1	1	1	1	1	1	1	1	1	1	2	1	1	2	1	1	1	1	1	1	1	1
GSM65768	3	3	3	3	2	2	2	3	3	2	3	3	5	3	2	3	3	3	3	3	3	2	2	5	3
GSM65769	1	1	1	1	2	1	1	1	1	1	1	1	1	1	1	1	1	2	1	1	1	1	1	2	1
GSM65770	1	1	1	1	1	1	1	1	1	1	1	1	1	1	1	1	1	1	1	1	1	1	1	1	1
GSM65771	1	1	1	1	1	1	1	1	1	1	1	1	1	1	1	1	1	2	1	1	1	1	1	2	1
GSM65772	3	3	3	3	4	2	3	2	2	2	4	5	3	1	1	3	3	3	3	3	4	3	1	3	3
GSM65773	1	1	1	1	1	1	1	1	1	1	1	1	1	1	1	1	1	2	4	1	1	1	1	1	1
GSM65774	2	2	2	2	2	2	2	2	2	2	2	2	1	2	2	2	2	2	1	2	2	2	2	2	2
GSM65775	1	1	1	1	2	1	1	1	1	1	1	2	1	1	1	1	1	1	1	1	1	1	1	1	1
GSM65776	1	1	1	1	1	1	1	1	1	2	1	1	1	1	1	1	1	2	1	1	1	1	1	2	1
GSM65779	1	1	4	4	1	1	1	1	1	1	1	1	1	1	1	1	1	1	1	4	1	1	1	1	1
GSM65780	1	1	1	1	1	1	1	1	1	1	1	1	1	1	1	1	1	1	1	1	1	1	1	1	1
GSM65781	1	1	1	1	1	1	1	1	1	1	1	1	1	1	1	1	1	1	1	1	1	1	1	1	1
GSM65782	1	1	1	1	1	1	1	1	1	1	1	1	1	1	1	1	1	2	1	1	1	1	1	2	1
GSM65783	1	1	1	1	1	1	1	1	1	1	1	1	1	1	1	1	1	1	1	1	1	1	1	1	1
GSM65784	1	1	2	2	1	1	1	1	1	1	1	1	1	1	1	1	1	2	1	2	1	1	1	2	1
GSM65785	1	1	1	1	1	1	1	1	1	1	1	1	1	1	1	1	1	1	1	1	1	1	1	1	1
GSM65786	2	2	2	2	2	1	2	2	1	2	2	2	1	2	2	2	2	2	2	2	2	2	1	2	2
GSM65787	1	1	1	1	1	1	1	1	1	1	1	1	1	1	1	1	1	1	1	1	1	1	1	1	1
GSM65788	1	1	1	1	1	1	1	1	1	1	1	1	1	1	1	1	1	1	1	1	1	1	1	1	1
GSM65789	1	1	1	1	1	1	1	1	1	2	1	1	1	1	1	1	1	1	1	1	1	1	1	1	1
GSM65790	1	1	1	1	1	1	1	1	1	1	1	1	1	1	1	1	1	2	1	1	1	1	1	2	1
GSM65791	1	1	1	1	1	1	1	1	1	1	1	1	1	1	1	1	1	1	1	1	1	1	1	1	1
GSM65792	5	5	5	5	5	5	5	5	5	2	5	5	5	5	5	5	5	5	5	5	5	5	5	5	5
GSM65793	1	1	1	1	1	1	1	1	1	1	1	1	1	1	1	1	1	1	1	1	1	1	1	1	1
GSM65794	3	3	3	3	3	2	3	3	3	2	1	3	3	3	2	1	5	3	4	3	1	3	3	5	3
GSM65795	5	5	5	5	5	5	5	5	5	5	5	5	5	5	5	5	5	5	5	5	5	5	5	5	5
GSM65796	1	1	1	1	1	1	1	1	1	1	1	1	1	1	1	1	1	1	1	1	1	1	1	1	1
GSM65797	1	1	1	1	1	1	1	1	1	1	1	1	1	1	1	1	1	1	1	1	1	1	1	1	1
GSM65798	1	1	1	1	1	1	1	1	1	1	1	1	1	1	1	1	1	2	1	1	1	1	1	2	1
GSM65799	1	1	1	1	1	1	1	1	1	1	1	1	1	1	1	1	1	1	1	1	1	1	1	1	1
GSM65800	1	1	1	1	1	1	1	1	1	1	1	1	1	1	1	1	1	1	1	1	1	1	1	2	1
GSM65801	1	1	1	1	1	1	1	1	1	1	2	1	1	1	1	1	1	1	1	1	1	1	1	1	1
GSM65802	5	5	5	5	5	5	5	5	3	2	5	5	5	5	5	5	5	5	5	5	5	5	5	5	5
GSM65803	1	1	1	1	1	1	1	1	1	1	1	1	1	1	1	1	1	1	1	1	1	1	1	1	1
GSM65804	INC	4	4	4	5	4	4	4	5	1	2	1	4	1	5	5	5	5	4	4	2	4	1	1	1
GSM65805	5	5	5	5	5	5	5	5	5	5	5	5	5	5	5	5	5	5	5	5	5	5	5	5	5
GSM65806	5	5	5	5	5	5	5	5	5	2	5	5	5	5	5	5	5	5	5	5	5	5	5	5	5
GSM65807	1	1	1	1	1	1	1	1	1	1	1	1	1	1	1	1	1	1	1	1	1	1	1	1	1
GSM65808	1	1	1	1	1	1	1	1	1	1	1	1	1	1	1	1	1	1	1	1	1	1	1	2	1
GSM65810	1	1	1	1	1	1	1	1	1	2	1	1	1	2	1	2	1	2	1	1	1	1	1	2	2
GSM65811	1	1	1	1	1	1	1	1	1	1	1	1	1	1	1	1	1	1	1	1	1	1	1	2	1
GSM65812	1	1	1	1	1	1	1	1	1	1	1	1	1	1	1	1	1	1	1	1	1	1	1	1	1
GSM65813	2	2	2	2	2	2	2	2	2	2	2	2	2	2	2	2	2	2	2	2	2	2	2	2	2
GSM65814	1	1	1	1	1	1	1	1	1	1	1	1	1	1	1	1	1	1	1	1	1	1	1	1	1
GSM65815	1	1	1	1	2	1	1	1	1	1	1	1	1	1	1	1	1	2	1	1	1	1	1	2	1
GSM65816	5	5	5	5	5	5	5	5	5	3	5	5	5	5	5	5	5	5	5	5	5	5	5	3	5
GSM65817	1	1	1	1	1	1	1	1	1	1	1	1	1	1	1	1	1	1	1	1	1	1	1	2	1
GSM65818	2	2	2	2	2	2	2	2	2	1	1	2	1	2	2	2	2	2	2	2	1	2	1	2	2
GSM65819	2	2	3	3	2	2	2	2	2	2	2	2	2	2	2	2	2	3	2	3	2	2	2	2	2
GSM65820	1	1	1	1	1	1	1	1	1	1	1	1	1	1	1	1	1	1	1	1	1	1	1	1	1
GSM65821	2	2	2	2	2	2	2	1	1	2	1	1	1	2	2	2	2	1	2	2	1	2	1	2	1
GSM65822	2	2	2	2	2	2	2	2	1	1	1	2	2	2	2	1	2	2	1	2	1	2	1	1	1
GSM65823	1	1	1	1	1	1	1	1	1	1	1	1	1	1	1	1	1	2	1	1	1	1	1	2	1
GSM65824	1	4	4	4	4	4	1	1	1	1	2	1	1	1	1	1	1	4	4	4	2	1	1	1	1
GSM65825	3	3	3	3	3	2	2	3	3	3	3	3	2	3	3	3	3	3	3	3	3	2	3	3	3
GSM65826	1	1	1	1	2	1	1	1	1	1	1	1	1	1	1	1	1	2	1	1	1	1	1	2	1
GSM65827	1	1	1	1	2	2	1	1	1	1	1	1	1	1	1	1	2	1	1	1	1	1	1	2	1
GSM65828	2	2	2	2	2	2	2	2	2	2	2	2	2	2	2	2	2	2	2	2	2	2	2	2	1
GSM65829	INC	1	2	2	2	2	2	2	1	2	1	1	2	1	2	1	1	2	1	2	1	2	1	1	1
GSM65830	1	1	1	1	1	1	1	1	1	2	2	1	1	1	1	1	1	1	1	1	2	1	1	1	1
GSM65831	2	2	2	2	2	2	2	2	2	2	2	2	2	2	2	2	2	2	2	2	2	2	2	2	2
GSM65832	1	1	1	1	1	1	1	1	1	1	1	1	1	1	1	1	1	2	1	1	1	1	1	2	1
GSM65833	2	2	2	2	2	2	2	2	2	1	1	2	1	1	2	1	1	2	1	2	1	2	1	1	1
GSM65834	1	1	1	1	2	2	2	2	1	1	1	1	1	2	2	2	1	2	1	1	1	2	1	2	1
GSM65835	3	3	3	3	4	4	3	4	4	3	1	3	3	3	1	3	5	3	4	3	1	3	3	3	3
GSM65836	1	1	1	1	1	1	1	1	1	1	1	1	1	1	1	1	1	1	1	1	1	1	1	1	1
GSM65837	2	2	2	2	2	2	2	2	2	1	1	2	1	2	2	2	2	2	2	2	1	2	2	2	2
GSM65838	3	3	3	3	3	3	2	2	2	2	3	3	3	3	2	3	3	3	3	3	3	2	3	3	3
GSM65839	3	3	3	3	3	3	3	3	3	2	3	3	3	3	2	3	3	3	3	3	3	3	3	3	3
GSM65840	1	1	1	1	1	1	1	1	1	1	1	1	1	1	1	1	1	1	1	1	1	1	1	2	1
GSM65841	5	5	5	5	5	5	5	5	5	5	5	5	5	5	5	5	5	5	5	5	5	5	5	5	5
GSM65842	5	5	5	5	5	5	5	5	5	2	5	5	5	5	5	5	5	5	5	5	5	5	5	3	5
GSM65843	3	3	3	3	3	5	3	3	3	2	5	3	3	3	5	3	5	3	3	3	5	3	3	3	3
GSM65844	2	2	2	2	2	2	2	2	2	2	2	2	2	2	2	2	2	2	2	2	2	2	2	2	2
GSM65845	5	5	5	5	5	5	5	5	5	2	5	5	5	5	5	5	5	5	5	5	5	5	5	3	5
GSM65846	2	2	2	2	2	2	2	2	2	2	2	2	2	2	2	2	2	2	2	2	2	2	2	2	2
GSM65847	1	1	1	1	1	2	1	1	1	1	1	1	1	1	1	1	1	2	1	1	1	1	1	1	1
GSM65848	1	1	1	1	1	1	1	1	1	1	1	1	1	1	1	1	1	2	1	1	1	1	1	1	1
GSM65849	1	1	1	1	1	1	1	1	1	1	1	1	1	1	1	1	1	2	1	1	1	1	1	1	1
GSM65850	5	5	5	5	5	5	5	5	5	5	5	5	5	5	5	5	5	5	5	5	5	5	5	5	5
GSM65851	2	2	2	2	2	2	2	2	2	2	2	2	2	2	2	2	2	2	2	2	2	2	2	2	2
GSM65852	5	5	5	5	5	5	5	5	5	5	5	5	5	5	5	5	5	5	5	5	5	5	5	5	5
GSM65853	1	1	1	1	1	1	1	1	1	1	1	1	1	1	1	1	1	2	1	1	1	1	1	2	1
GSM65854	1	1	1	1	1	2	1	1	1	1	1	1	1	1	1	1	1	2	1	1	1	1	1	1	1
GSM65855	1	1	4	4	2	2	1	1	2	2	1	2	2	1	1	1	5	2	1	4	1	1	1	1	1
GSM65856	2	2	2	2	2	2	2	2	2	2	2	2	1	2	2	2	2	2	2	2	2	2	2	2	2
GSM65857	2	2	2	2	2	2	2	2	2	2	2	2	2	2	2	2	2	2	2	2	2	2	2	2	2
GSM65858	1	1	1	1	1	1	1	1	1	1	1	1	1	1	1	1	1	1	1	1	1	1	1	1	1
GSM65859	1	1	1	1	2	1	1	1	1	1	1	1	1	1	1	1	1	2	1	1	1	1	1	2	1
GSM65860	1	1	1	1	2	1	1	1	1	1	1	1	1	1	1	2	1	2	1	1	1	1	1	2	1
GSM65861	3	3	3	3	4	5	3	3	4	3	4	5	3	3	5	3	3	5	1	3	4	3	5	5	3
GSM65862	1	1	1	1	1	1	1	1	1	1	1	1	1	1	1	1	1	1	1	1	1	1	1	1	1
GSM65863	5	5	5	5	5	5	5	5	5	5	5	5	5	5	5	5	5	5	5	5	5	5	5	5	5
GSM65864	1	1	1	1	1	1	1	1	1	1	1	1	1	1	1	1	1	2	1	1	1	1	1	1	1
GSM65865	4	4	4	4	4	4	4	4	4	4	4	4	4	4	4	4	4	5	4	4	4	4	1	4	1
GSM65866	3	3	3	3	3	2	2	3	5	2	3	3	3	3	2	3	3	3	3	3	3	2	3	3	3
GSM65867	1	1	1	1	1	1	1	1	1	1	1	1	1	2	1	1	1	2	1	1	1	1	1	2	1
GSM65868	2	2	2	2	2	2	2	2	2	2	2	2	2	2	2	2	2	2	2	2	2	2	2	2	2
GSM65869	2	2	2	2	2	2	2	2	1	1	1	2	2	1	2	2	1	2	1	2	1	2	2	2	1
GSM65870	2	3	3	3	2	2	2	2	1	1	2	2	2	2	2	2	5	2	1	3	2	2	2	2	2
GSM65871	1	1	1	1	1	1	1	1	1	1	1	1	1	1	1	1	1	2	1	1	1	1	1	1	1
GSM65872	1	1	1	1	2	2	2	1	1	2	1	1	1	1	1	1	1	1	1	1	1	2	1	1	1
GSM65873	2	1	2	2	2	2	2	1	2	2	1	2	1	2	2	2	2	2	2	2	1	2	2	1	1
GSM65874	4	4	4	4	4	4	4	4	1	1	4	1	1	4	4	1	1	1	4	4	4	4	1	1	1
GSM65875	1	1	1	1	1	1	1	1	2	1	1	1	1	1	1	1	1	1	1	1	1	1	1	1	1
GSM65876	INC	2	4	4	4	2	2	3	4	1	4	5	3	2	2	3	3	3	3	4	4	2	3	5	5
GSM65877	1	1	1	1	1	2	1	1	1	1	1	1	1	1	1	1	1	2	1	1	1	1	1	2	1
GSM65878	5	5	5	5	5	5	5	5	4	1	4	5	5	5	5	5	5	5	4	5	4	5	5	5	5
GSM65879	INC	5	4	4	5	5	4	4	4	1	4	5	5	5	5	5	5	5	4	4	4	4	1	3	5
GSM65880	1	1	1	1	2	2	1	1	1	1	1	1	1	1	1	1	1	1	1	1	1	1	1	1	1

## Sheet: Label METABRIC Discovery CM1
	Luminal A	Luminal B	Her2-enriched	Normal-like	Basal
	X1	X2	X3	X4	X5
MB-0362	19	5	0	0	0
MB-0346	0	1	23	0	0
MB-0386	15	9	0	0	0
MB-0574	21	3	0	0	0
MB-0185	0	24	0	0	0
MB-0503	23	1	0	0	0
MB-0641	5	0	0	19	0
MB-0201	0	0	16	0	8
MB-0218	0	24	0	0	0
MB-0316	0	0	0	1	23
MB-0189	15	0	1	8	0
MB-0891	24	0	0	0	0
MB-0658	0	0	0	0	24
MB-0899	24	0	0	0	0
MB-0605	24	0	0	0	0
MB-0258	23	1	0	0	0
MB-0506	0	1	19	0	4
MB-0420	0	0	0	0	24
MB-0223	21	0	0	3	0
MB-0445	24	0	0	0	0
MB-0199	24	0	0	0	0
MB-0517	24	0	0	0	0
MB-0155	10	0	0	14	0
MB-0428	24	0	0	0	0
MB-0117	24	0	0	0	0
MB-0906	0	0	13	6	5
MB-0249	0	0	19	0	5
MB-0660	0	0	21	1	2
MB-0497	23	1	0	0	0
MB-0434	1	23	0	0	0
MB-0143	21	3	0	0	0
MB-0513	17	7	0	0	0
MB-0541	11	13	0	0	0
MB-0653	2	8	14	0	0
MB-0455	0	24	0	0	0
MB-0540	3	0	1	16	4
MB-0384	12	12	0	0	0
MB-0637	0	24	0	0	0
MB-0157	0	0	1	0	23
MB-0443	16	8	0	0	0
MB-0584	0	24	0	0	0
MB-0292	0	0	23	0	1
MB-0322	23	0	1	0	0
MB-0501	24	0	0	0	0
MB-0401	0	0	0	0	24
MB-0140	19	5	0	0	0
MB-0606	3	21	0	0	0
MB-0666	7	17	0	0	0
MB-0598	5	19	0	0	0
MB-0453	3	5	16	0	0
MB-0138	24	0	0	0	0
MB-0579	8	16	0	0	0
MB-0405	1	23	0	0	0
MB-0471	8	16	0	0	0
MB-0347	0	8	13	0	3
MB-0619	23	0	0	1	0
MB-0171	9	0	0	15	0
MB-0310	24	0	0	0	0
MB-0621	16	0	0	8	0
MB-0614	10	14	0	0	0
MB-0372	0	0	0	0	24
MB-0374	2	21	1	0	0
MB-0382	21	0	0	3	0
MB-0327	24	0	0	0	0
MB-0066	2	22	0	0	0
MB-0144	21	3	0	0	0
MB-0596	24	0	0	0	0
MB-0164	0	0	0	0	24
MB-0215	9	15	0	0	0
MB-0146	3	21	0	0	0
MB-0229	21	3	0	0	0
MB-0505	24	0	0	0	0
MB-0102	2	22	0	0	0
MB-0569	0	24	0	0	0
MB-0516	0	0	0	0	24
MB-0272	0	24	0	0	0
MB-0585	8	16	0	0	0
MB-0494	0	0	16	0	8
MB-0306	20	4	0	0	0
MB-0463	24	0	0	0	0
MB-0198	0	24	0	0	0
MB-0203	23	1	0	0	0
MB-0607	22	0	0	2	0
MB-0631	23	1	0	0	0
MB-0363	0	24	0	0	0
MB-0427	11	12	1	0	0
MB-0519	4	0	0	20	0
MB-0371	10	12	1	0	1
MB-0380	0	24	0	0	0
MB-0221	1	1	22	0	0
MB-0348	24	0	0	0	0
MB-0261	10	14	0	0	0
MB-0576	3	20	1	0	0
MB-0385	6	18	0	0	0
MB-0659	2	0	0	11	11
MB-0270	0	23	1	0	0
MB-0379	24	0	0	0	0
MB-0432	2	0	5	6	11
MB-0527	24	0	0	0	0
MB-0624	19	0	0	5	0
MB-0273	24	0	0	0	0
MB-0050	8	0	0	16	0
MB-0460	13	0	0	11	0
MB-0654	23	1	0	0	0
MB-0454	22	2	0	0	0
MB-0392	7	1	1	15	0
MB-0336	0	24	0	0	0
MB-0467	0	0	23	0	1
MB-0349	4	20	0	0	0
MB-0378	0	0	24	0	0
MB-0176	17	0	0	7	0
MB-0429	1	23	0	0	0
MB-0397	24	0	0	0	0
MB-0571	14	10	0	0	0
MB-0426	16	0	0	8	0
MB-0135	0	24	0	0	0
MB-0112	24	0	0	0	0
MB-0352	3	0	14	6	1
MB-0644	20	0	0	4	0
MB-0601	0	23	1	0	0
MB-0568	24	0	0	0	0
MB-0328	0	24	0	0	0
MB-0325	0	23	1	0	0
MB-0358	18	2	0	4	0
MB-0413	20	4	0	0	0
MB-0158	0	0	20	0	4
MB-0636	20	4	0	0	0
MB-0145	23	0	0	1	0
MB-0195	0	24	0	0	0
MB-0422	23	1	0	0	0
MB-0483	10	14	0	0	0
MB-0317	24	0	0	0	0
MB-0486	23	1	0	0	0
MB-0139	13	0	0	11	0
MB-0257	20	4	0	0	0
MB-0345	24	0	0	0	0
MB-0375	5	0	0	12	7
MB-0419	24	0	0	0	0
MB-0480	24	0	0	0	0
MB-0311	0	24	0	0	0
MB-0324	10	14	0	0	0
MB-0368	0	24	0	0	0
MB-0389	0	24	0	0	0
MB-0248	21	3	0	0	0
MB-0035	4	7	12	0	1
MB-0667	0	24	0	0	0
MB-0423	22	0	0	2	0
MB-0904	24	0	0	0	0
MB-0119	4	20	0	0	0
MB-0650	23	1	0	0	0
MB-0204	24	0	0	0	0
MB-0184	23	1	0	0	0
MB-0600	9	15	0	0	0
MB-0400	0	0	2	0	22
MB-0511	24	0	0	0	0
MB-0059	10	14	0	0	0
MB-0500	0	0	0	0	24
MB-0150	1	0	0	0	23
MB-0895	3	21	0	0	0
MB-0366	23	1	0	0	0
MB-0173	0	24	0	0	0
MB-0131	24	0	0	0	0
MB-0206	0	0	0	0	24
MB-0315	24	0	0	0	0
MB-0361	0	0	21	0	3
MB-0545	6	3	0	15	0
MB-0370	1	23	0	0	0
MB-0642	24	0	0	0	0
MB-0431	24	0	0	0	0
MB-0181	23	0	0	1	0
MB-0603	24	0	0	0	0
MB-0295	24	0	0	0	0
MB-0618	19	5	0	0	0
MB-0496	11	0	0	13	0
MB-0411	24	0	0	0	0
MB-0285	8	0	0	16	0
MB-0360	0	24	0	0	0
MB-0359	21	0	0	3	0
MB-0344	8	0	0	16	0
MB-0583	24	0	0	0	0
MB-0202	17	7	0	0	0
MB-0485	22	0	0	2	0
MB-0609	23	1	0	0	0
MB-0538	24	0	0	0	0
MB-0197	3	21	0	0	0
MB-0410	23	0	0	1	0
MB-0528	24	0	0	0	0
MB-0165	12	3	8	1	0
MB-0152	0	0	23	1	0
MB-0546	20	0	0	4	0
MB-0148	0	1	20	0	3
MB-0594	17	7	0	0	0
MB-0521	15	0	0	9	0
MB-0532	0	23	1	0	0
MB-0536	0	23	0	0	1
MB-0319	1	23	0	0	0
MB-0491	23	1	0	0	0
MB-0404	23	1	0	0	0
MB-0243	23	1	0	0	0
MB-0580	21	3	0	0	0
MB-0312	0	24	0	0	0
MB-0060	1	16	6	0	1
MB-0635	1	0	2	19	2
MB-0649	24	0	0	0	0
MB-0643	0	0	22	0	2
MB-0581	0	0	20	0	4
MB-0383	5	19	0	0	0
MB-0142	24	0	0	0	0
MB-0320	18	0	0	6	0
MB-0207	24	0	0	0	0
MB-0167	0	23	1	0	0
MB-0591	4	20	0	0	0
MB-0613	0	0	9	1	14
MB-0313	0	24	0	0	0
MB-0599	21	0	2	1	0
MB-0286	19	0	0	5	0
MB-0575	24	0	0	0	0
MB-0549	1	23	0	0	0
MB-0214	0	1	1	0	22
MB-0589	18	6	0	0	0
MB-0406	0	24	0	0	0
MB-0452	2	22	0	0	0
MB-0524	13	0	0	11	0
MB-0880	24	0	0	0	0
MB-0573	23	1	0	0	0
MB-0664	0	0	0	0	24
MB-0446	0	0	0	0	24
MB-0008	1	22	1	0	0
MB-0656	0	0	0	1	23
MB-0154	24	0	0	0	0
MB-0597	7	0	0	17	0
MB-0550	0	24	0	0	0
MB-0616	1	23	0	0	0
MB-0448	8	16	0	0	0
MB-0412	0	24	0	0	0
MB-0122	24	0	0	0	0
MB-0425	24	0	0	0	0
MB-0314	0	0	24	0	0
MB-0356	22	2	0	0	0
MB-0440	0	24	0	0	0
MB-0398	3	21	0	0	0
MB-0438	1	0	23	0	0
MB-0449	24	0	0	0	0
MB-0162	24	0	0	0	0
MB-0593	1	0	3	4	16
MB-0301	24	0	0	0	0
MB-0628	19	0	0	5	0
MB-0283	1	22	1	0	0
MB-0106	24	0	0	0	0
MB-0341	23	0	0	1	0
MB-0474	1	23	0	0	0
MB-0394	23	1	0	0	0
MB-0373	1	22	1	0	0
MB-0247	22	0	0	2	0
MB-0225	1	22	1	0	0
MB-0424	0	0	0	22	2
MB-0209	3	0	0	19	2
MB-0115	0	0	0	0	24
MB-0136	24	0	0	0	0
MB-0542	17	0	0	7	0
MB-0354	3	0	10	3	8
MB-0151	18	6	0	0	0
MB-0590	0	24	0	0	0
MB-0608	0	0	0	0	24
MB-0657	4	0	0	20	0
MB-0559	22	2	0	0	0
MB-0893	1	0	4	14	5
MB-0514	1	23	0	0	0
MB-0395	0	0	22	2	0
MB-0294	12	0	1	10	1
MB-0439	0	24	0	0	0
MB-0481	0	0	0	0	24
MB-0529	24	0	0	0	0
MB-0224	24	0	0	0	0
MB-0302	17	0	0	7	0
MB-0126	22	2	0	0	0
MB-0220	1	0	2	21	0
MB-0192	10	1	0	13	0
MB-0121	24	0	0	0	0
MB-0239	24	0	0	0	0
MB-0364	24	0	0	0	0
MB-0232	24	0	0	0	0
MB-0884	0	24	0	0	0
MB-0238	0	0	0	0	24
MB-0194	20	0	0	4	0
MB-0882	0	24	0	0	0
MB-0010	0	24	0	0	0
MB-0236	23	1	0	0	0
MB-0377	7	0	0	17	0
MB-0123	16	8	0	0	0
MB-0504	24	0	0	0	0
MB-0564	3	0	14	4	3
MB-0475	12	6	5	1	0
MB-0321	16	7	1	0	0
MB-0482	0	0	6	6	12
MB-0101	24	0	0	0	0
MB-0662	21	0	2	1	0
MB-0291	1	23	0	0	0
MB-0465	3	20	0	1	0
MB-0630	0	24	0	0	0
MB-0036	24	0	0	0	0
MB-0166	24	0	0	0	0
MB-0180	23	1	0	0	0
MB-0525	0	0	11	0	13
MB-0307	9	0	1	14	0
MB-0002	16	8	0	0	0
MB-0408	24	0	0	0	0
MB-0466	23	0	0	1	0
MB-0632	18	0	5	0	1
MB-0120	10	13	1	0	0
MB-0507	24	0	0	0	0
MB-0287	8	15	1	0	0
MB-0869	0	0	0	0	24
MB-4633	24	0	0	0	0
MB-4627	24	0	0	0	0
MB-4004	8	16	0	0	0
MB-4708	24	0	0	0	0
MB-4618	3	21	0	0	0
MB-4641	24	0	0	0	0
MB-4622	0	0	0	0	24
MB-4634	24	0	0	0	0
MB-4688	0	24	0	0	0
MB-4665	24	0	0	0	0
MB-4666	21	2	0	1	0
MB-4640	1	1	19	0	3
MB-4691	24	0	0	0	0
MB-4671	6	18	0	0	0
MB-4667	4	0	19	1	0
MB-4721	24	0	0	0	0
MB-4723	2	22	0	0	0
MB-4718	7	0	0	17	0
MB-4716	23	0	0	1	0
MB-4729	13	1	9	1	0
MB-4717	0	0	0	0	24
MB-4724	0	0	24	0	0
MB-4770	0	0	23	0	1
MB-4752	24	0	0	0	0
MB-4762	24	0	0	0	0
MB-5169	10	14	0	0	0
MB-4796	0	24	0	0	0
MB-4790	23	0	0	1	0
MB-4797	21	3	0	0	0
MB-4800	24	0	0	0	0
MB-5541	14	0	0	10	0
MB-5549	0	0	24	0	0
MB-5519	2	22	0	0	0
MB-5495	24	0	0	0	0
MB-4832	24	0	0	0	0
MB-4745	1	0	13	1	9
MB-4825	10	14	0	0	0
MB-4814	9	0	0	15	0
MB-4757	0	0	0	0	24
MB-4694	2	3	0	2	17
MB-4698	24	0	0	0	0
MB-4715	0	0	0	0	24
MB-4685	1	23	0	0	0
MB-4712	1	0	15	7	1
MB-4672	11	12	1	0	0
MB-4704	19	0	0	5	0
MB-4655	21	1	1	1	0
MB-4651	1	23	0	0	0
MB-4661	23	1	0	0	0
MB-4649	2	22	0	0	0
MB-4642	2	22	0	0	0
MB-4674	23	1	0	0	0
MB-4648	0	24	0	0	0
MB-5197	17	7	0	0	0
MB-5152	14	10	0	0	0
MB-5201	24	0	0	0	0
MB-5189	24	0	0	0	0
MB-5281	5	0	19	0	0
MB-5212	1	23	0	0	0
MB-5172	0	4	19	0	1
MB-5183	24	0	0	0	0
MB-5185	21	3	0	0	0
MB-5022	7	1	15	1	0
MB-5014	1	23	0	0	0
MB-4994	4	20	0	0	0
MB-5017	18	3	3	0	0
MB-4982	1	1	17	2	3
MB-5004	6	10	5	0	3
MB-4986	16	3	0	5	0
MB-5327	0	0	24	0	0
MB-5341	12	11	1	0	0
MB-5323	0	0	0	0	24
MB-5328	1	23	0	0	0
MB-5318	10	10	0	3	1
MB-5287	24	0	0	0	0
MB-5324	24	0	0	0	0
MB-4682	22	2	0	0	0
MB-4710	20	0	0	4	0
MB-4701	24	0	0	0	0
MB-4709	24	0	0	0	0
MB-4686	24	0	0	0	0
MB-4706	24	0	0	0	0
MB-4719	24	0	0	0	0
MB-4702	1	23	0	0	0
MB-4908	0	24	0	0	0
MB-4871	0	0	13	0	11
MB-4906	23	1	0	0	0
MB-4911	0	0	0	0	24
MB-4866	23	0	1	0	0
MB-4858	17	1	6	0	0
MB-4862	0	24	0	0	0
MB-4872	23	0	0	1	0
MB-4887	16	0	1	7	0
MB-4867	24	0	0	0	0
MB-4888	0	0	0	0	24
MB-4929	3	0	21	0	0
MB-4945	0	0	0	1	23
MB-4930	0	22	2	0	0
MB-4894	5	19	0	0	0
MB-4898	24	0	0	0	0
MB-4670	24	0	0	0	0
MB-5013	24	0	0	0	0
MB-4977	24	0	0	0	0
MB-4967	24	0	0	0	0
MB-4981	24	0	0	0	0
MB-4003	2	22	0	0	0
MB-4968	24	0	0	0	0
MB-5052	0	0	21	1	2
MB-5049	4	20	0	0	0
MB-5041	0	3	21	0	0
MB-5044	0	24	0	0	0
MB-5072	1	0	21	2	0
MB-4171	13	10	1	0	0
MB-5053	24	0	0	0	0
MB-5045	16	4	4	0	0
MB-5116	0	24	0	0	0
MB-5120	0	0	24	0	0
MB-5074	17	7	0	0	0
MB-5119	24	0	0	0	0
MB-5114	1	0	7	0	16
MB-4230	21	2	0	1	0
MB-4154	1	21	1	0	1
MB-5115	0	0	0	0	24
MB-4737	0	24	0	0	0
MB-4764	23	0	0	1	0
MB-4735	24	0	0	0	0
MB-4730	24	0	0	0	0
MB-4733	0	0	1	0	23
MB-4758	0	0	0	2	22
MB-5033	20	4	0	0	0
MB-4741	13	11	0	0	0
MB-4732	1	0	0	0	23
MB-5305	24	0	0	0	0
MB-5256	24	0	0	0	0
MB-5273	0	24	0	0	0
MB-5236	0	0	0	0	24
MB-5238	0	0	0	24	0
MB-5233	0	24	0	0	0
MB-5244	1	23	0	0	0
MB-5253	24	0	0	0	0
MB-5260	1	23	0	0	0
MB-4998	13	11	0	0	0
MB-4993	1	0	12	6	5
MB-5001	20	0	1	2	1
MB-5084	24	0	0	0	0
MB-4969	24	0	0	0	0
MB-4999	22	0	0	2	0
MB-5011	24	0	0	0	0
MB-4959	24	0	0	0	0
MB-4599	24	0	0	0	0
MB-4616	24	0	0	0	0
MB-4623	21	3	0	0	0
MB-4644	0	23	1	0	0
MB-4869	24	0	0	0	0
MB-4878	22	0	0	2	0
MB-4851	18	6	0	0	0
MB-4233	0	23	1	0	0
MB-4937	5	18	1	0	0
MB-4934	6	18	0	0	0
MB-4899	24	0	0	0	0
MB-4912	1	23	0	0	0
MB-4935	0	1	19	0	4
MB-4933	4	15	5	0	0
MB-4900	0	22	2	0	0
MB-4941	24	0	0	0	0
MB-5221	23	1	0	0	0
MB-5139	11	13	0	0	0
MB-5222	0	0	12	0	12
MB-5097	13	11	0	0	0
MB-5338	0	24	0	0	0
MB-5315	0	0	17	2	5
MB-5195	2	21	1	0	0
MB-5226	3	21	0	0	0
MB-5232	1	0	0	0	23
MB-5160	0	24	0	0	0
MB-5126	0	0	0	0	24
MB-5124	0	24	0	0	0
MB-4855	23	1	0	0	0
MB-5279	17	7	0	0	0
MB-4173	24	0	0	0	0
MB-5145	0	0	0	16	8
MB-4944	0	24	0	0	0
MB-4961	20	4	0	0	0
MB-5121	0	24	0	0	0
MB-4956	4	20	0	0	0
MB-4886	0	0	20	1	3
MB-4950	23	1	0	0	0
MB-4965	19	5	0	0	0
MB-4962	24	0	0	0	0
MB-4952	0	0	23	0	1
MB-5267	16	0	0	8	0
MB-5266	0	22	2	0	0
MB-5396	0	24	0	0	0
MB-4938	0	0	0	0	24
MB-5351	2	0	0	22	0
MB-5347	0	24	0	0	0
MB-5312	1	0	13	0	10
MB-5311	23	0	0	1	0
MB-5284	24	0	0	0	0
MB-4148	3	21	0	0	0
MB-5078	6	6	12	0	0
MB-5088	17	7	0	0	0
MB-5064	24	0	0	0	0
MB-5107	0	24	0	0	0
MB-5066	24	0	0	0	0
MB-5068	24	0	0	0	0
MB-5061	2	22	0	0	0
MB-5070	0	0	0	0	24
MB-5059	24	0	0	0	0
MB-4266	11	6	6	1	0
MB-4276	4	11	9	0	0
MB-4771	24	0	0	0	0
MB-4739	24	0	0	0	0
MB-5331	23	0	1	0	0
MB-4743	13	0	0	11	0
MB-4785	17	7	0	0	0
MB-4778	24	0	0	0	0
MB-4763	0	0	24	0	0
MB-4779	24	0	0	0	0
MB-4849	13	11	0	0	0
MB-4787	24	0	0	0	0
MB-4767	7	17	0	0	0
MB-4784	24	0	0	0	0
MB-5043	24	0	0	0	0
MB-4992	18	0	5	1	0
MB-5020	24	0	0	0	0
MB-5019	1	0	14	4	5
MB-5015	23	1	0	0	0
MB-5048	24	0	0	0	0
MB-5035	22	0	0	2	0
MB-5398	24	0	0	0	0
MB-5377	21	3	0	0	0
MB-5291	2	22	0	0	0
MB-5403	24	0	0	0	0
MB-5224	24	0	0	0	0
MB-5369	24	0	0	0	0
MB-5404	23	1	0	0	0
MB-5397	17	7	0	0	0
MB-5378	0	0	0	0	24
MB-5388	24	0	0	0	0
MB-5395	24	0	0	0	0
MB-5365	23	1	0	0	0
MB-5389	17	7	0	0	0
MB-5385	19	5	0	0	0
MB-5393	23	1	0	0	0
MB-5289	24	0	0	0	0
MB-5361	8	16	0	0	0
MB-5392	0	0	22	0	2
MB-5147	19	0	4	1	0
MB-4140	24	0	0	0	0
MB-5138	0	1	3	0	20
MB-5123	24	0	0	0	0
MB-5065	0	0	1	0	23
MB-4127	0	1	23	0	0
MB-5058	3	0	19	2	0
MB-5050	24	0	0	0	0
MB-5027	24	0	0	0	0
MB-5060	0	24	0	0	0
MB-5062	0	23	1	0	0
MB-5383	11	13	0	0	0
MB-5101	1	23	0	0	0
MB-5258	0	0	0	0	24
MB-5268	24	0	0	0	0
MB-5261	2	22	0	0	0
MB-5272	1	2	6	7	8
MB-5264	24	0	0	0	0
MB-5259	0	0	22	0	2
MB-5306	12	12	0	0	0
MB-5270	9	15	0	0	0
MB-5411	0	1	22	0	1
MB-5490	23	1	0	0	0
MB-5421	0	0	0	1	23
MB-5348	0	0	0	0	24
MB-5429	24	0	0	0	0
MB-5405	0	24	0	0	0
MB-5414	5	14	5	0	0
MB-5489	24	0	0	0	0
MB-5417	1	0	20	0	3
MB-5481	2	22	0	0	0
MB-5409	0	0	23	0	1
MB-5413	24	0	0	0	0
MB-5299	0	0	0	0	24
MB-5408	3	0	13	6	2
MB-5475	7	17	0	0	0
MB-5505	1	23	0	0	0
MB-5100	0	0	0	0	24
MB-5325	0	0	0	1	23
MB-5502	0	24	0	0	0
MB-5485	2	21	0	1	0
MB-4293	24	0	0	0	0
MB-4289	9	14	1	0	0
MB-5293	17	7	0	0	0
MB-5381	1	0	21	0	2
MB-4834	1	23	0	0	0
MB-5498	4	12	5	1	2
MB-4749	23	1	0	0	0
MB-4818	13	11	0	0	0
MB-4805	22	2	0	0	0
MB-4809	0	0	0	0	24
MB-5418	0	24	0	0	0
MB-5441	11	0	8	5	0
MB-5424	24	0	0	0	0
MB-5296	1	0	15	5	3
MB-5446	3	0	21	0	0
MB-5137	0	0	0	0	24
MB-5219	24	0	0	0	0
MB-5093	4	20	0	0	0
MB-5350	9	12	3	0	0
MB-5230	23	0	0	1	0
MB-5206	22	0	0	2	0
MB-4687	16	1	2	5	0
MB-5433	19	5	0	0	0
MB-5442	0	0	0	0	24
MB-5427	1	0	0	0	23
MB-5491	6	18	0	0	0
MB-5493	5	19	0	0	0
MB-5451	23	1	0	0	0
MB-5454	1	11	11	0	1
MB-5360	24	0	0	0	0
MB-5229	0	0	15	7	2
MB-4827	24	0	0	0	0
MB-5455	22	0	1	1	0
MB-5349	23	1	0	0	0
MB-5370	0	24	0	0	0
MB-5290	24	0	0	0	0
MB-5366	0	12	11	1	0
MB-5382	24	0	0	0	0
MB-5402	19	5	0	0	0
MB-5288	6	18	0	0	0
MB-5384	22	2	0	0	0
MB-5358	24	0	0	0	0
MB-4357	14	1	9	0	0
MB-4991	0	24	0	0	0
MB-5401	24	0	0	0	0
MB-5387	0	0	0	0	24
MB-5390	0	0	0	0	24
MB-5412	24	0	0	0	0
MB-5193	14	10	0	0	0
MB-5182	24	0	0	0	0
MB-5157	2	0	19	1	2
MB-5205	0	1	0	1	22
MB-5161	5	0	0	19	0
MB-5292	0	24	0	0	0
MB-5211	0	24	0	0	0
MB-5218	0	24	0	0	0
MB-5209	0	1	7	3	13
MB-5227	20	3	1	0	0
MB-5213	0	0	23	0	1
MB-5166	0	24	0	0	0
MB-5163	21	3	0	0	0
MB-5188	0	0	5	1	18
MB-5143	24	0	0	0	0
MB-5329	10	2	8	2	2
MB-5322	22	2	0	0	0
MB-5310	23	1	0	0	0
MB-4000	24	0	0	0	0
MB-5240	24	0	0	0	0
MB-5228	2	22	0	0	0
MB-5136	23	0	0	1	0
MB-5140	4	20	0	0	0
MB-5106	1	23	0	0	0
MB-5117	21	2	0	0	1
MB-5104	24	0	0	0	0
MB-5131	24	0	0	0	0
MB-5109	14	0	2	8	0
MB-5176	7	16	1	0	0
MB-5158	24	0	0	0	0
MB-5076	0	0	0	0	24
MB-5215	10	14	0	0	0
MB-5223	1	0	0	6	17
MB-5179	24	0	0	0	0
MB-5330	24	0	0	0	0
MB-5144	4	19	1	0	0
MB-5196	8	16	0	0	0
MB-5200	0	24	0	0	0
MB-5583	24	0	0	0	0
MB-5601	21	3	0	0	0
MB-5632	1	23	0	0	0
MB-5616	0	0	1	0	23
MB-5604	0	24	0	0	0
MB-5589	24	0	0	0	0
MB-5582	24	0	0	0	0
MB-5625	0	0	0	0	24
MB-5571	19	5	0	0	0
MB-5596	24	0	0	0	0
MB-5590	2	22	0	0	0
MB-5599	24	0	0	0	0
MB-5629	15	9	0	0	0
MB-5579	24	0	0	0	0
MB-5623	8	16	0	0	0
MB-5654	11	13	0	0	0
MB-5617	24	0	0	0	0
MB-5638	19	4	1	0	0
MB-5635	16	2	5	1	0
MB-5642	24	0	0	0	0
MB-5647	22	2	0	0	0
MB-4018	24	0	0	0	0
MB-5584	0	23	1	0	0
MB-5626	24	0	0	0	0
MB-5602	0	0	23	0	1
MB-5653	11	13	0	0	0
MB-5576	1	22	1	0	0
MB-5575	1	23	0	0	0
MB-5646	13	11	0	0	0
MB-5634	0	0	0	0	24
MB-5591	23	1	0	0	0
MB-5567	23	1	0	0	0
MB-5651	0	0	3	0	21
MB-5603	24	0	0	0	0
MB-5622	8	16	0	0	0
MB-5597	24	0	0	0	0
MB-5613	0	23	1	0	0
MB-5580	24	0	0	0	0
MB-5645	19	5	0	0	0
MB-5548	0	0	0	0	24
MB-5526	0	0	0	0	24
MB-5531	0	0	0	0	24
MB-5468	0	0	1	0	23
MB-5474	1	0	7	5	11
MB-5514	23	1	0	0	0
MB-5302	10	3	0	10	1
MB-5510	24	0	0	0	0
MB-5473	24	0	0	0	0
MB-5484	24	0	0	0	0
MB-5432	24	0	0	0	0
MB-5525	1	23	0	0	0
MB-5562	9	15	0	0	0
MB-5497	4	20	0	0	0
MB-5551	0	0	0	0	24
MB-5300	24	0	0	0	0
MB-5560	0	0	1	0	23
MB-5550	22	2	0	0	0
MB-5520	14	10	0	0	0
MB-5529	0	0	0	0	24
MB-5554	17	7	0	0	0
MB-5301	4	0	19	1	0
MB-4421	21	3	0	0	0
MB-4408	0	0	1	0	23
MB-4146	1	0	0	1	22
MB-5534	6	13	4	1	0
MB-5521	14	10	0	0	0
MB-5482	0	0	0	0	24
MB-5483	1	0	22	0	1
MB-5532	14	10	0	0	0
MB-5556	1	23	0	0	0
MB-5518	2	22	0	0	0
MB-5486	4	20	0	0	0
MB-5511	1	0	22	0	1
MB-5422	24	0	0	0	0
MB-5535	0	0	22	0	2
MB-5477	0	24	0	0	0
MB-5472	24	0	0	0	0
MB-5540	0	24	0	0	0
MB-5184	23	0	0	1	0
MB-5294	0	0	0	1	23
MB-5565	0	0	0	0	24
MB-5040	3	21	0	0	0
MB-4801	24	0	0	0	0
MB-5499	24	0	0	0	0
MB-5459	0	24	0	0	0
MB-5243	15	9	0	0	0
MB-4120	24	0	0	0	0
MB-4966	22	0	1	1	0
MB-5457	24	0	0	0	0
MB-4011	20	3	1	0	0
MB-5478	24	0	0	0	0
MB-4822	24	0	0	0	0
MB-4017	0	24	0	0	0
MB-5018	20	4	0	0	0
MB-4791	3	21	0	0	0
MB-5118	24	0	0	0	0
MB-4806	24	0	0	0	0
MB-4970	2	22	0	0	0
MB-2964	16	1	7	0	0
MB-2963	13	3	4	2	2
MB-2957	0	0	0	0	24
MB-2954	8	16	0	0	0
MB-2916	24	0	0	0	0
MB-2725	17	0	0	7	0
MB-2711	24	0	0	0	0
MB-2730	1	23	0	0	0
MB-2669	21	0	1	2	0
MB-2705	1	23	0	0	0
MB-2728	2	22	0	0	0
MB-2708	2	22	0	0	0
MB-2735	5	16	3	0	0
MB-3035	24	0	0	0	0
MB-3064	19	0	0	5	0
MB-3060	1	23	0	0	0
MB-3049	23	1	0	0	0
MB-3037	24	0	0	0	0
MB-3063	0	0	0	0	24
MB-3083	0	24	0	0	0
MB-3046	0	0	0	0	24
MB-3067	0	0	0	0	24
MB-3351	23	1	0	0	0
MB-3367	0	0	1	0	23
MB-3361	0	24	0	0	0
MB-3412	23	1	0	0	0
MB-3371	4	20	0	0	0
MB-3429	1	0	0	23	0
MB-3360	1	23	0	0	0
MB-3403	18	6	0	0	0
MB-3350	3	21	0	0	0
MB-3355	0	0	23	0	1
MB-3329	0	1	22	0	1
MB-3467	2	0	21	0	1
MB-3341	17	7	0	0	0
MB-3298	23	1	0	0	0
MB-3357	0	24	0	0	0
MB-3388	0	24	0	0	0
MB-3365	24	0	0	0	0
MB-2749	23	0	0	1	0
MB-2754	2	0	7	14	1
MB-2752	23	0	0	1	0
MB-2745	23	1	0	0	0
MB-2747	18	6	0	0	0
MB-2760	18	6	0	0	0
MB-2742	0	0	9	2	13
MB-2750	24	0	0	0	0
MB-2753	0	0	1	0	23
MB-2966	20	4	0	0	0
MB-2953	5	18	1	0	0
MB-2969	22	2	0	0	0
MB-3014	0	0	0	0	24
MB-2947	23	0	0	1	0
MB-2951	17	0	0	7	0
MB-2960	22	2	0	0	0
MB-2970	20	0	0	4	0
MB-2971	24	0	0	0	0
MB-2933	23	0	0	1	0
MB-3479	0	0	0	24	0
MB-3490	0	24	0	0	0
MB-3487	1	23	0	0	0
MB-3459	2	22	0	0	0
MB-3476	0	1	1	0	22
MB-3492	10	14	0	0	0
MB-3452	20	1	3	0	0
MB-3303	4	20	0	0	0
MB-3328	24	0	0	0	0
MB-3300	15	9	0	0	0
MB-3277	0	0	0	0	24
MB-3254	24	0	0	0	0
MB-3275	0	24	0	0	0
MB-3272	8	16	0	0	0
MB-3271	0	0	0	0	24
MB-3292	0	0	0	0	24
MB-3840	0	24	0	0	0
MB-2536	24	0	0	0	0
MB-2564	24	0	0	0	0
MB-2513	0	0	23	0	1
MB-2617	2	22	0	0	0
MB-2614	22	2	0	0	0
MB-2632	0	0	22	1	1
MB-2556	1	0	0	21	2
MB-2624	24	0	0	0	0
MB-2867	15	0	0	9	0
MB-2922	0	0	24	0	0
MB-2917	0	0	0	0	24
MB-2858	0	24	0	0	0
MB-2854	24	0	0	0	0
MB-2853	6	18	0	0	0
MB-3235	0	22	2	0	0
MB-3165	0	0	23	0	1
MB-3171	24	0	0	0	0
MB-3167	13	11	0	0	0
MB-3222	24	0	0	0	0
MB-3706	0	0	0	0	24
MB-3497	4	0	19	1	0
MB-3488	2	1	17	4	0
MB-3711	23	1	0	0	0
MB-3548	15	9	0	0	0
MB-3506	0	24	0	0	0
MB-3525	0	24	0	0	0
MB-3606	0	0	23	1	0
MB-3453	1	0	14	5	4
MB-3545	18	0	0	6	0
MB-3470	1	0	16	4	3
MB-2765	23	1	0	0	0
MB-2763	12	12	0	0	0
MB-2767	0	24	0	0	0
MB-2790	20	4	0	0	0
MB-2769	6	18	0	0	0
MB-2842	0	0	1	0	23
MB-2772	2	22	0	0	0
MB-2779	23	1	0	0	0
MB-2774	8	16	0	0	0
MB-2983	0	24	0	0	0
MB-3005	24	0	0	0	0
MB-2977	24	0	0	0	0
MB-2996	21	3	0	0	0
MB-2999	11	13	0	0	0
MB-2994	21	2	0	1	0
MB-3025	0	0	24	0	0
MB-2984	0	23	1	0	0
MB-3002	17	4	0	3	0
MB-2845	20	0	0	4	0
MB-2912	0	0	0	0	24
MB-2844	0	23	1	0	0
MB-2847	0	2	21	0	1
MB-2849	0	0	9	3	12
MB-2851	22	1	0	0	1
MB-2848	23	1	0	0	0
MB-2863	21	1	1	1	0
MB-2840	24	0	0	0	0
MB-2843	24	0	0	0	0
MB-3013	24	0	0	0	0
MB-3058	1	0	0	1	22
MB-3016	1	23	0	0	0
MB-3057	0	0	0	0	24
MB-3008	24	0	0	0	0
MB-3021	21	2	1	0	0
MB-3032	21	1	0	2	0
MB-3007	3	21	0	0	0
MB-3033	24	0	0	0	0
MB-3026	15	9	0	0	0
MB-3006	4	1	0	19	0
MB-3439	24	0	0	0	0
MB-3437	10	14	0	0	0
MB-3395	1	0	0	2	21
MB-3386	0	0	22	0	2
MB-3382	1	22	1	0	0
MB-3379	24	0	0	0	0
MB-3430	24	0	0	0	0
MB-3389	0	23	1	0	0
MB-3378	24	0	0	0	0
MB-3110	24	0	0	0	0
MB-3079	24	0	0	0	0
MB-3103	2	22	0	0	0
MB-3102	14	10	0	0	0
MB-3085	4	0	0	20	0
MB-3122	0	12	12	0	0
MB-3104	21	0	0	2	1
MB-3123	0	0	1	0	23
MB-3121	22	2	0	0	0
MB-2835	23	1	0	0	0
MB-2838	22	2	0	0	0
MB-2801	20	3	1	0	0
MB-2834	0	0	24	0	0
MB-2796	8	16	0	0	0
MB-2857	0	0	0	0	24
MB-2819	23	1	0	0	0
MB-2781	11	12	0	1	0
MB-2793	13	11	0	0	0
MB-2827	0	0	0	0	24
MB-2814	2	22	0	0	0
MB-2791	24	0	0	0	0
MB-2803	0	24	0	0	0
MB-2797	21	1	0	2	0
MB-2795	19	4	0	1	0
MB-2786	23	1	0	0	0
MB-3850	24	0	0	0	0
MB-3556	0	0	24	0	0
MB-3838	2	22	0	0	0
MB-3707	19	4	0	1	0
MB-3600	0	24	0	0	0
MB-3824	0	24	0	0	0
MB-3823	24	0	0	0	0
MB-3781	21	3	0	0	0
MB-2642	0	24	0	0	0
MB-2686	0	21	3	0	0
MB-2616	1	0	0	23	0
MB-2634	0	24	0	0	0
MB-2613	0	24	0	0	0
MB-3842	0	23	0	1	0
MB-3866	0	0	24	0	0
MB-3874	20	4	0	0	0
MB-3871	24	0	0	0	0
MB-3702	0	0	1	6	17
MB-3105	24	0	0	0	0
MB-3852	12	12	0	0	0
MB-3854	21	0	0	3	0
MB-3865	22	0	0	2	0
MB-3228	24	0	0	0	0
MB-3028	11	7	6	0	0
MB-3502	0	0	0	0	24
MB-3567	0	0	0	0	24
MB-3752	0	0	0	0	24
MB-3450	24	0	0	0	0
MB-0444	11	13	0	0	0
MB-0476	1	0	1	22	0
MB-0610	23	0	0	1	0
MB-0451	20	0	0	4	0
MB-0133	21	0	0	3	0

## Sheet: Label METABRIC Validation CM1
	Luminal A	Luminal B	Her2-enriched	Normal-like	Basal
	X1	X2	X3	X4	X5
MB-0005	6	18	0	0	0
MB-0048	6	1	2	13	2
MB-0025	0	24	0	0	0
MB-0083	20	4	0	0	0
MB-0053	0	24	0	0	0
MB-0056	1	23	0	0	0
MB-0068	24	0	0	0	0
MB-0093	5	18	0	1	0
MB-0079	0	1	23	0	0
MB-0108	5	17	0	2	0
MB-0006	14	10	0	0	0
MB-0014	23	1	0	0	0
MB-0022	21	3	0	0	0
MB-0039	8	16	0	0	0
MB-0062	0	1	0	1	22
MB-0054	4	20	0	0	0
MB-0081	13	4	0	6	1
MB-0071	1	22	1	0	0
MB-0099	14	10	0	0	0
MB-0064	2	22	0	0	0
MB-0107	0	24	0	0	0
MB-4681	24	0	0	0	0
MB-4626	23	1	0	0	0
MB-4639	5	19	0	0	0
MB-4673	3	21	0	0	0
MB-4711	1	0	16	0	7
MB-4607	24	0	0	0	0
MB-4669	0	24	0	0	0
MB-4015	0	0	20	0	4
MB-2931	23	1	0	0	0
MB-2927	24	0	0	0	0
MB-2919	24	0	0	0	0
MB-2944	23	1	0	0	0
MB-2929	2	0	22	0	0
MB-2932	0	24	0	0	0
MB-2724	1	0	1	16	6
MB-2712	24	0	0	0	0
MB-2720	14	10	0	0	0
MB-3062	0	0	0	0	24
MB-3050	4	20	0	0	0
MB-4722	24	0	0	0	0
MB-4731	1	0	23	0	0
MB-4725	2	21	1	0	0
MB-4707	0	0	0	0	24
MB-4643	0	0	24	0	0
MB-3363	0	2	4	0	18
MB-3383	0	0	1	0	23
MB-3344	24	0	0	0	0
MB-3381	24	0	0	0	0
MB-3297	0	0	1	1	22
MB-3301	12	11	0	1	0
MB-3088	23	1	0	0	0
MB-2764	0	0	0	24	0
MB-2744	1	0	0	23	0
MB-7114	0	0	0	0	24
MB-7118	24	0	0	0	0
MB-7113	24	0	0	0	0
MB-7130	0	24	0	0	0
MB-7149	2	22	0	0	0
MB-7140	0	24	0	0	0
MB-7148	24	0	0	0	0
MB-7208	0	0	24	0	0
MB-7170	22	2	0	0	0
MB-7174	0	24	0	0	0
MB-7252	0	0	23	0	1
MB-7244	24	0	0	0	0
MB-7187	1	0	0	23	0
MB-7251	1	0	20	0	3
MB-7173	24	0	0	0	0
MB-3001	0	0	0	0	24
MB-2952	24	0	0	0	0
MB-7097	22	2	0	0	0
MB-7104	0	21	3	0	0
MB-7099	1	23	0	0	0
MB-7069	0	0	24	0	0
MB-7066	12	0	3	9	0
MB-7100	3	21	0	0	0
MB-7067	0	0	18	0	6
MB-7073	0	0	19	0	5
MB-7063	24	0	0	0	0
MB-7102	6	18	0	0	0
MB-7068	0	23	1	0	0
MB-7075	0	24	0	0	0
MB-7053	24	0	0	0	0
MB-7074	23	0	0	1	0
MB-7057	0	0	0	23	1
MB-7109	0	24	0	0	0
MB-7051	1	23	0	0	0
MB-7071	7	17	0	0	0
MB-7106	24	0	0	0	0
MB-7059	0	0	24	0	0
MB-7107	18	6	0	0	0
MB-7076	18	6	0	0	0
MB-7111	9	0	0	10	5
MB-7015	1	23	0	0	0
MB-7026	24	0	0	0	0
MB-7013	24	0	0	0	0
MB-7023	0	0	0	0	24
MB-7024	0	24	0	0	0
MB-7014	11	7	6	0	0
MB-7017	0	0	0	0	24
MB-7019	24	0	0	0	0
MB-3510	24	0	0	0	0
MB-3500	0	0	0	0	24
MB-3396	0	0	19	0	5
MB-3435	0	1	23	0	0
MB-7186	0	24	0	0	0
MB-7142	4	19	1	0	0
MB-7196	0	24	0	0	0
MB-7171	3	21	0	0	0
MB-7145	0	0	0	0	24
MB-7132	19	5	0	0	0
MB-7189	0	24	0	0	0
MB-7137	24	0	0	0	0
MB-7181	10	14	0	0	0
MB-7155	0	0	0	0	24
MB-7138	0	24	0	0	0
MB-3295	8	0	0	16	0
MB-3218	0	0	0	0	24
MB-7232	24	0	0	0	0
MB-7281	0	0	22	2	0
MB-7270	0	0	20	0	4
MB-7231	24	0	0	0	0
MB-7220	24	0	0	0	0
MB-7277	24	0	0	0	0
MB-7269	0	0	0	1	23
MB-7280	24	0	0	0	0
MB-7227	18	0	2	4	0
MB-7278	24	0	0	0	0
MB-2610	24	0	0	0	0
MB-2517	0	0	23	0	1
MB-2896	24	0	0	0	0
MB-2901	0	24	0	0	0
MB-2895	0	0	18	1	5
MB-2900	1	0	0	23	0
MB-2939	0	24	0	0	0
MB-7008	2	0	7	15	0
MB-7002	20	4	0	0	0
MB-7000	3	21	0	0	0
MB-7006	24	0	0	0	0
MB-7007	0	0	4	0	20
MB-7011	0	24	0	0	0
MB-7001	22	2	0	0	0
MB-7009	0	0	0	0	24
MB-7003	22	2	0	0	0
MB-7005	24	0	0	0	0
MB-7010	24	0	0	0	0
MB-3153	0	0	20	0	4
MB-3211	0	0	0	0	24
MB-3181	1	23	0	0	0
MB-3252	22	0	0	2	0
MB-3266	14	10	0	0	0
MB-7082	0	0	23	0	1
MB-7081	0	0	0	0	24
MB-7093	24	0	0	0	0
MB-7083	0	24	0	0	0
MB-7091	24	0	0	0	0
MB-7065	16	8	0	0	0
MB-7085	24	0	0	0	0
MB-7096	24	0	0	0	0
MB-7018	22	2	0	0	0
MB-7088	0	6	17	0	1
MB-7055	0	1	9	0	14
MB-7080	24	0	0	0	0
MB-7161	24	0	0	0	0
MB-7115	0	19	5	0	0
MB-7123	24	0	0	0	0
MB-7176	11	13	0	0	0
MB-7121	0	0	0	1	23
MB-7172	13	10	0	1	0
MB-7164	24	0	0	0	0
MB-7127	24	0	0	0	0
MB-7128	24	0	0	0	0
MB-7157	3	21	0	0	0
MB-7092	0	24	0	0	0
MB-7135	0	0	24	0	0
MB-3754	6	17	0	1	0
MB-3536	20	0	1	3	0
MB-3748	23	1	0	0	0
MB-3530	5	19	0	0	0
MB-3582	6	0	0	18	0
MB-3528	0	0	24	0	0
MB-3547	21	0	0	3	0
MB-3576	0	24	0	0	0
MB-2770	24	0	0	0	0
MB-2758	1	0	11	1	11
MB-2771	0	0	0	0	24
MB-7152	1	23	0	0	0
MB-7143	0	0	23	0	1
MB-7197	20	4	0	0	0
MB-7153	9	5	10	0	0
MB-7144	2	22	0	0	0
MB-7185	24	0	0	0	0
MB-7199	0	24	0	0	0
MB-7158	0	0	1	3	20
MB-7163	24	0	0	0	0
MB-7215	24	0	0	0	0
MB-7200	22	2	0	0	0
MB-7193	0	24	0	0	0
MB-7188	24	0	0	0	0
MB-7198	11	2	5	5	1
MB-7256	2	0	18	1	3
MB-7258	0	0	0	0	24
MB-7194	1	23	0	0	0
MB-7254	24	0	0	0	0
MB-7262	0	19	5	0	0
MB-2990	24	0	0	0	0
MB-2993	0	0	0	0	24
MB-3031	2	4	18	0	0
MB-2904	0	0	1	0	23
MB-2846	8	0	3	13	0
MB-7154	0	0	0	0	24
MB-7229	20	4	0	0	0
MB-7151	0	0	0	0	24
MB-7228	21	0	0	3	0
MB-7218	24	0	0	0	0
MB-7147	0	24	0	0	0
MB-7219	24	0	0	0	0
MB-7165	0	0	0	0	24
MB-7150	2	22	0	0	0
MB-3436	2	22	0	0	0
MB-3462	24	0	0	0	0
MB-3417	8	16	0	0	0
MB-2721	23	1	0	0	0
MB-3092	8	16	0	0	0
MB-2821	0	0	2	10	12
MB-2850	0	0	0	0	24
MB-2820	24	0	0	0	0
MB-2823	11	0	0	13	0
MB-2792	2	18	3	1	0
MB-7273	0	0	24	0	0
MB-7283	18	6	0	0	0
MB-7284	24	0	0	0	0
MB-7279	0	16	8	0	0
MB-7233	23	1	0	0	0
MB-7287	0	24	0	0	0
MB-7250	0	0	23	1	0
MB-7238	0	24	0	0	0
MB-7285	15	9	0	0	0
MB-7260	0	22	2	0	0
MB-7264	21	0	0	3	0
MB-7268	23	0	0	1	0
MB-7276	24	0	0	0	0
MB-7212	13	0	0	11	0
MB-7267	0	0	0	0	24
MB-7266	15	9	0	0	0
MB-7216	24	0	0	0	0
MB-7195	24	0	0	0	0
MB-7201	0	0	16	8	0
MB-7217	24	0	0	0	0
MB-2815	15	0	0	9	0
MB-2833	1	0	1	3	19
MB-3614	0	24	0	0	0
MB-7052	0	1	3	0	20
MB-7124	22	2	0	0	0
MB-7122	9	2	12	1	0
MB-7133	4	20	0	0	0
MB-7084	0	0	0	0	24
MB-7101	24	0	0	0	0
MB-7116	8	14	2	0	0
MB-7131	0	24	0	0	0
MB-7090	0	0	9	0	15
MB-7095	17	7	0	0	0
MB-7094	1	21	2	0	0
MB-7087	0	0	0	0	24
MB-7077	24	0	0	0	0
MB-7072	0	24	0	0	0
MB-7041	24	0	0	0	0
MB-7044	2	0	0	22	0
MB-7022	16	8	0	0	0
MB-7070	16	4	4	0	0
MB-7079	3	0	0	21	0
MB-7035	0	3	16	2	3
MB-7025	0	0	1	0	23
MB-7062	24	0	0	0	0
MB-7036	0	0	0	0	24
MB-7046	1	23	0	0	0
MB-4839	22	1	0	1	0
MB-5559	1	0	0	11	12
MB-5463	15	9	0	0	0
MB-4744	0	24	0	0	0
MB-4769	0	0	0	0	24
MB-4484	18	0	0	6	0
MB-5558	2	0	2	17	3
MB-4750	10	14	0	0	0
MB-4793	0	0	0	0	24
MB-4843	24	0	0	0	0
MB-5563	24	0	0	0	0
MB-5546	23	0	0	1	0
MB-5513	2	16	6	0	0
MB-5656	13	0	0	11	0
MB-5530	11	2	2	9	0
MB-5553	18	6	0	0	0
MB-4836	1	21	1	0	1
MB-4828	1	23	0	0	0
MB-4679	0	0	1	0	23
MB-4033	24	0	0	0	0
MB-4692	22	2	0	0	0
MB-4675	24	0	0	0	0
MB-4653	12	0	0	12	0
MB-4663	0	0	12	0	12
MB-4660	0	0	0	0	24
MB-5275	19	5	0	0	0
MB-4654	10	14	0	0	0
MB-2618	0	24	0	0	0
MB-2718	0	0	0	0	24
MB-2643	0	0	5	5	14
MB-2629	3	20	1	0	0
MB-2645	0	17	7	0	0
MB-2626	21	3	0	0	0
MB-6263	22	2	0	0	0
MB-6305	0	0	2	0	22
MB-6185	24	0	0	0	0
MB-6187	0	0	0	24	0
MB-6248	0	0	0	0	24
MB-6330	2	0	20	1	1
MB-6184	0	24	0	0	0
MB-6329	0	24	0	0	0
MB-6283	23	1	0	0	0
MB-6359	20	4	0	0	0
MB-6337	0	0	24	0	0
MB-6256	24	0	0	0	0
MB-6201	20	4	0	0	0
MB-6207	24	0	0	0	0
MB-6194	15	0	4	5	0
MB-6281	4	20	0	0	0
MB-6322	21	3	0	0	0
MB-6223	0	0	19	0	5
MB-6190	24	0	0	0	0
MB-6306	0	24	0	0	0
MB-6188	0	0	0	0	24
MB-6318	0	0	24	0	0
MB-6228	0	0	2	12	10
MB-6226	12	12	0	0	0
MB-6225	24	0	0	0	0
MB-6280	0	0	0	0	24
MB-6253	24	0	0	0	0
MB-6098	0	0	0	0	24
MB-6017	24	0	0	0	0
MB-6019	15	0	0	9	0
MB-6163	24	0	0	0	0
MB-6157	9	9	5	1	0
MB-6179	15	9	0	0	0
MB-6105	23	1	0	0	0
MB-6047	0	24	0	0	0
MB-6001	24	0	0	0	0
MB-6050	24	0	0	0	0
MB-6169	0	0	18	2	4
MB-4548	2	1	14	1	6
MB-4564	24	0	0	0	0
MB-4591	3	21	0	0	0
MB-4557	24	0	0	0	0
MB-4601	0	0	20	0	4
MB-4598	0	24	0	0	0
MB-4578	24	0	0	0	0
MB-4593	24	0	0	0	0
MB-5186	24	0	0	0	0
MB-4974	0	0	0	0	24
MB-4978	12	0	0	12	0
MB-5086	24	0	0	0	0
MB-5150	24	0	0	0	0
MB-5345	24	0	0	0	0
MB-4696	0	1	1	0	22
MB-4695	13	0	0	11	0
MB-4714	0	0	0	0	24
MB-4705	18	0	0	6	0
MB-4882	23	1	0	0	0
MB-4879	0	0	24	0	0
MB-4881	0	0	0	0	24
MB-4846	0	24	0	0	0
MB-4870	22	1	0	1	0
MB-4845	23	1	0	0	0
MB-4904	0	0	23	0	1
MB-4865	0	0	0	0	24
MB-4876	6	13	0	5	0
MB-4860	24	0	0	0	0
MB-5081	23	0	0	1	0
MB-4897	1	0	0	23	0
MB-4925	19	5	0	0	0
MB-4883	24	0	0	0	0
MB-4896	0	1	19	1	3
MB-4987	24	0	0	0	0
MB-4416	0	0	1	0	23
MB-4374	22	1	0	1	0
MB-4407	0	0	0	0	24
MB-5039	4	20	0	0	0
MB-4119	18	6	0	0	0
MB-4091	23	1	0	0	0
MB-5079	24	0	0	0	0
MB-5073	24	0	0	0	0
MB-5105	24	0	0	0	0
MB-4254	0	0	0	0	24
MB-5174	4	12	8	0	0
MB-4742	24	0	0	0	0
MB-5239	2	22	0	0	0
MB-5251	24	0	0	0	0
MB-4996	24	0	0	0	0
MB-4282	22	2	0	0	0
MB-4603	24	0	0	0	0
MB-4621	0	1	1	0	22
MB-4853	24	0	0	0	0
MB-4362	24	0	0	0	0
MB-4602	0	24	0	0	0
MB-4222	6	13	5	0	0
MB-4893	0	0	0	1	23
MB-4859	0	0	0	23	1
MB-4212	24	0	0	0	0
MB-4873	17	7	0	0	0
MB-4942	0	0	0	0	24
MB-4949	0	24	0	0	0
MB-4928	0	4	17	0	3
MB-5098	24	0	0	0	0
MB-5313	10	8	5	1	0
MB-4145	17	7	0	0	0
MB-5122	24	0	0	0	0
MB-5278	14	0	0	10	0
MB-4213	20	4	0	0	0
MB-4126	8	0	15	1	0
MB-4957	5	16	3	0	0
MB-5470	13	11	0	0	0
MB-5317	5	18	1	0	0
MB-5308	8	0	0	16	0
MB-4976	24	0	0	0	0
MB-5277	19	0	0	5	0
MB-5110	7	0	0	17	0
MB-4046	15	5	4	0	0
MB-4012	3	0	21	0	0
MB-4141	20	3	0	1	0
MB-4001	24	0	0	0	0
MB-4792	0	0	0	0	24
MB-4738	13	0	0	11	0
MB-4264	17	2	1	4	0
MB-4794	23	1	0	0	0
MB-4782	1	0	0	23	0
MB-5008	1	4	18	0	1
MB-4426	21	0	1	2	0
MB-4390	24	0	0	0	0
MB-4434	21	3	0	0	0
MB-4368	21	3	0	0	0
MB-4442	23	0	0	0	1
MB-4418	22	2	0	0	0
MB-4381	23	0	1	0	0
MB-4395	2	21	1	0	0
MB-4630	2	20	2	0	0
MB-6010	0	24	0	0	0
MB-6021	24	0	0	0	0
MB-6059	24	0	0	0	0
MB-6154	3	21	0	0	0
MB-6097	22	1	1	0	0
MB-6107	20	0	0	4	0
MB-6023	23	1	0	0	0
MB-6152	0	0	23	0	1
MB-6018	24	0	0	0	0
MB-6082	18	0	0	6	0
MB-6029	24	0	0	0	0
MB-5295	0	0	0	0	24
MB-5386	9	15	0	0	0
MB-5092	23	0	0	1	0
MB-6068	0	0	0	3	21
MB-6039	2	22	0	0	0
MB-6022	8	16	0	0	0
MB-6125	24	0	0	0	0
MB-6053	9	15	0	0	0
MB-6135	0	24	0	0	0
MB-6042	24	0	0	0	0
MB-6058	0	0	0	0	24
MB-6052	1	0	1	19	3
MB-5368	23	0	0	1	0
MB-4189	7	11	5	0	1
MB-5335	0	0	0	0	24
MB-4008	2	22	0	0	0
MB-5134	24	0	0	0	0
MB-4139	0	24	0	0	0
MB-5130	24	0	0	0	0
MB-5135	0	0	0	0	24
MB-4880	0	0	0	0	24
MB-5054	1	0	16	4	3
MB-5057	0	0	0	0	24
MB-4098	23	0	1	0	0
MB-4760	24	0	0	0	0
MB-5102	0	0	5	0	19
MB-5420	6	0	0	18	0
MB-5458	0	0	23	1	0
MB-5492	24	0	0	0	0
MB-5407	24	0	0	0	0
MB-5394	0	0	24	0	0
MB-5410	24	0	0	0	0
MB-5435	0	24	0	0	0
MB-5406	1	23	0	0	0
MB-4329	24	0	0	0	0
MB-4005	12	11	0	1	0
MB-6288	13	11	0	0	0
MB-6272	0	0	0	0	24
MB-6218	24	0	0	0	0
MB-6246	0	6	16	0	2
MB-6217	2	22	0	0	0
MB-6206	24	0	0	0	0
MB-6308	24	0	0	0	0
MB-6271	24	0	0	0	0
MB-6245	0	0	0	0	24
MB-6233	15	9	0	0	0
MB-4343	9	1	13	1	0
MB-4281	0	22	2	0	0
MB-4283	24	0	0	0	0
MB-4341	0	0	24	0	0
MB-4303	0	0	17	0	7
MB-4274	20	4	0	0	0
MB-4292	23	1	0	0	0
MB-4278	12	11	1	0	0
MB-5399	24	0	0	0	0
MB-5364	20	0	0	4	0
MB-3526	15	0	0	9	0
MB-6138	24	0	0	0	0
MB-6049	0	23	1	0	0
MB-6055	0	0	0	0	24
MB-6108	21	0	0	3	0
MB-6044	14	3	6	1	0
MB-6181	24	0	0	0	0
MB-6100	1	0	23	0	0
MB-6085	0	0	24	0	0
MB-6113	18	0	1	5	0
MB-6079	19	5	0	0	0
MB-6103	22	0	0	2	0
MB-6016	24	0	0	0	0
MB-6149	23	1	0	0	0
MB-6131	0	0	24	0	0
MB-6007	19	5	0	0	0
MB-6147	6	0	0	18	0
MB-6114	8	5	8	3	0
MB-6167	24	0	0	0	0
MB-6146	2	19	3	0	0
MB-6092	23	0	0	1	0
MB-6160	0	0	23	0	1
MB-6075	4	20	0	0	0
MB-6011	0	24	0	0	0
MB-6071	24	0	0	0	0
MB-6214	24	0	0	0	0
MB-6334	0	24	0	0	0
MB-6346	17	7	0	0	0
MB-6319	24	0	0	0	0
MB-6200	17	7	0	0	0
MB-6336	0	0	0	0	24
MB-6211	24	0	0	0	0
MB-6232	24	0	0	0	0
MB-6234	14	0	0	10	0
MB-6300	21	3	0	0	0
MB-5533	20	0	0	4	0
MB-5543	23	1	0	0	0
MB-4236	19	2	3	0	0
MB-4234	24	0	0	0	0
MB-4270	0	24	0	0	0
MB-4235	5	1	0	8	10
MB-4250	24	0	0	0	0
MB-5467	10	0	0	14	0
MB-4323	23	1	0	0	0
MB-4318	1	23	0	0	0
MB-4333	24	0	0	0	0
MB-4339	18	4	2	0	0
MB-4322	24	0	0	0	0
MB-4351	2	0	21	0	1
MB-5063	0	0	22	2	0
MB-4360	0	0	9	2	13
MB-4375	20	0	0	4	0
MB-4798	24	0	0	0	0
MB-4746	22	2	0	0	0
MB-4838	0	24	0	0	0
MB-4829	21	3	0	0	0
MB-4802	0	24	0	0	0
MB-5426	0	0	4	2	18
MB-5444	24	0	0	0	0
MB-5431	3	0	0	15	6
MB-5447	0	24	0	0	0
MB-5434	7	17	0	0	0
MB-5255	0	0	0	22	2
MB-5231	0	0	23	0	1
MB-5208	0	0	0	0	24
MB-5428	24	0	0	0	0
MB-5440	0	1	0	0	23
MB-5425	21	3	0	0	0
MB-5298	0	0	0	0	24
MB-5334	22	2	0	0	0
MB-5326	21	0	0	3	0
MB-4059	24	0	0	0	0
MB-6230	24	0	0	0	0
MB-6150	3	21	0	0	0
MB-6014	9	0	0	15	0
MB-6145	0	24	0	0	0
MB-6012	24	0	0	0	0
MB-6024	24	0	0	0	0
MB-6124	13	11	0	0	0
MB-6171	24	0	0	0	0
MB-6060	0	24	0	0	0
MB-6008	0	24	0	0	0
MB-6036	0	0	0	0	24
MB-6144	0	0	1	0	23
MB-5346	0	0	1	0	23
MB-5373	20	4	0	0	0
MB-6178	0	0	0	0	24
MB-6063	3	0	9	7	5
MB-6020	7	17	0	0	0
MB-6062	0	2	2	0	20
MB-6069	24	0	0	0	0
MB-6141	14	10	0	0	0
MB-6118	24	0	0	0	0
MB-6065	24	0	0	0	0
MB-6006	21	3	0	0	0
MB-6048	5	19	0	0	0
MB-6116	0	23	1	0	0
MB-4310	22	2	0	0	0
MB-4300	9	0	15	0	0
MB-4298	13	11	0	0	0
MB-4417	0	0	1	0	23
MB-4079	4	10	9	1	0
MB-4317	7	6	8	3	0
MB-4350	1	0	13	1	9
MB-4332	0	0	1	0	23
MB-4324	4	16	4	0	0
MB-4306	24	0	0	0	0
MB-7226	1	23	0	0	0
MB-7205	0	0	0	0	24
MB-7160	13	11	0	0	0
MB-7159	0	0	0	0	24
MB-7167	13	10	0	0	1
MB-7207	0	0	24	0	0
MB-7241	19	5	0	0	0
MB-7236	22	2	0	0	0
MB-7168	20	0	0	4	0
MB-7162	24	0	0	0	0
MB-7235	24	0	0	0	0
MB-4331	0	24	0	0	0
MB-4353	5	19	0	0	0
MB-4354	2	0	21	0	1
MB-4328	10	14	0	0	0
MB-4348	0	21	3	0	0
MB-6030	24	0	0	0	0
MB-6133	24	0	0	0	0
MB-6083	24	0	0	0	0
MB-6026	0	24	0	0	0
MB-6168	24	0	0	0	0
MB-6101	19	0	0	4	1
MB-6156	0	23	1	0	0
MB-6051	24	0	0	0	0
MB-6182	0	0	24	0	0
MB-6080	0	22	2	0	0
MB-6143	1	0	1	0	22
MB-6164	2	22	0	0	0
MB-0551	1	0	0	23	0
MB-0391	1	0	21	2	0
MB-0367	18	0	0	6	0
MB-5171	1	0	0	23	0
MB-5199	3	0	8	10	3
MB-5177	1	22	0	1	0
MB-5178	24	0	0	0	0
MB-5280	24	0	0	0	0
MB-5148	4	0	2	18	0
MB-4342	24	0	0	0	0
MB-5225	0	0	0	0	24
MB-4024	0	0	0	2	22
MB-6314	0	24	0	0	0
MB-6257	3	21	0	0	0
MB-6358	2	5	14	0	3
MB-6242	0	0	1	0	23
MB-6237	0	0	0	0	24
MB-6183	9	15	0	0	0
MB-6254	23	1	0	0	0
MB-6231	24	0	0	0	0
MB-6204	23	0	0	1	0
MB-6229	24	0	0	0	0
MB-5154	1	0	1	21	1
MB-5175	19	0	0	5	0
MB-5173	0	0	0	0	24
MB-5162	0	0	1	15	8
MB-5164	10	0	0	14	0
MB-7253	0	24	0	0	0
MB-7298	0	24	0	0	0
MB-7299	1	23	0	0	0
MB-7293	24	0	0	0	0
MB-3978	0	7	16	0	1
MB-7288	1	23	0	0	0
MB-2923	0	1	23	0	0
MB-0402	2	0	0	22	0
MB-0381	2	19	3	0	0
MB-0592	14	10	0	0	0
MB-5271	0	24	0	0	0
MB-5235	0	0	0	2	22
MB-4931	0	0	0	0	24
MB-5332	2	22	0	0	0
MB-7045	3	1	18	1	1
MB-7049	0	0	2	0	22
MB-7031	0	0	0	0	24
MB-7061	24	0	0	0	0
MB-7050	16	3	5	0	0
MB-7078	0	1	1	0	22
MB-7054	0	1	1	2	20
MB-7048	24	0	0	0	0
MB-7058	24	0	0	0	0
MB-7056	24	0	0	0	0
MB-7038	0	0	0	0	24
MB-7086	6	18	0	0	0
MB-0177	24	0	0	0	0
MB-0435	1	0	1	9	13
MB-0159	0	0	4	12	8
MB-0399	0	0	24	0	0
MB-0388	14	0	0	10	0
MB-0351	23	1	0	0	0
MB-0615	1	0	3	17	3
MB-0265	1	0	0	21	2
MB-0116	24	0	0	0	0
MB-0472	3	21	0	0	0
MB-0330	7	2	0	13	2
MB-0191	0	0	2	0	22
MB-0231	24	0	0	0	0
MB-0558	0	0	0	0	24
MB-0393	8	1	0	15	0
MB-0553	23	1	0	0	0
MB-0587	18	6	0	0	0
MB-0611	22	2	0	0	0
MB-0640	24	0	0	0	0
MB-0114	24	0	0	0	0
MB-0222	19	0	0	5	0
MB-0284	1	0	0	0	23
MB-0459	5	19	0	0	0
MB-0128	24	0	0	0	0
MB-0639	0	0	0	0	24
MB-0318	1	0	0	20	3
MB-0417	20	4	0	0	0
MB-6238	24	0	0	0	0
MB-6286	24	0	0	0	0
MB-6328	14	10	0	0	0
MB-6284	0	24	0	0	0
MB-6363	1	1	20	0	2
MB-6224	0	0	24	0	0
MB-6297	24	0	0	0	0
MB-6239	24	0	0	0	0
MB-6208	24	0	0	0	0
MB-6273	24	0	0	0	0
MB-6344	3	21	0	0	0
MB-6312	3	21	0	0	0
MB-6212	24	0	0	0	0
MB-6302	0	24	0	0	0
MB-6327	14	10	0	0	0
MB-6287	1	23	0	0	0
MB-6213	24	0	0	0	0
MB-6251	0	0	0	0	24
MB-0489	0	0	0	23	1
MB-0335	12	12	0	0	0
MB-0407	23	0	0	1	0
MB-0876	1	0	0	21	2
MB-0342	3	0	0	21	0
MB-7289	0	0	0	24	0
MB-3253	0	24	0	0	0
MB-7291	0	1	16	2	5
MB-7243	22	2	0	0	0
MB-3466	0	24	0	0	0
MB-7286	1	23	0	0	0
MB-7292	0	24	0	0	0
MB-7275	3	13	8	0	0
MB-7249	24	0	0	0	0
MB-7295	24	0	0	0	0
MB-7297	0	24	0	0	0
MB-7294	3	21	0	0	0
MB-7296	0	24	0	0	0
MB-3402	6	18	0	0	0
MB-5113	23	0	0	1	0
MB-5450	0	0	0	0	24
MB-7032	24	0	0	0	0
MB-7037	24	0	0	0	0
MB-7040	24	0	0	0	0
MB-7020	0	0	22	0	2
MB-7042	3	21	0	0	0
MB-7043	23	0	1	0	0
MB-7028	2	22	0	0	0
MB-7029	24	0	0	0	0
MB-7027	0	0	5	0	19
MB-7060	24	0	0	0	0
MB-7034	21	3	0	0	0
MB-5191	24	0	0	0	0
MB-5214	13	0	0	11	0
MB-5204	24	0	0	0	0
MB-5155	9	0	1	13	1
MB-5190	0	0	4	7	13
MB-5614	24	0	0	0	0
MB-5592	12	12	0	0	0
MB-0437	0	24	0	0	0
MB-0028	0	24	0	0	0
MB-0309	24	0	0	0	0
MB-0100	0	0	0	0	24
MB-5648	24	0	0	0	0
MB-5572	0	0	1	0	23
MB-5655	0	0	0	0	24
MB-5577	3	6	15	0	0
MB-5585	24	0	0	0	0
MB-5620	23	1	0	0	0
MB-5652	0	0	0	24	0
MB-0537	2	0	0	22	0
MB-0544	12	12	0	0	0
MB-0468	24	0	0	0	0
MB-0333	0	1	1	0	22
MB-0205	1	0	0	23	0
MB-0233	24	0	0	0	0
MB-0210	0	0	2	4	18
MB-0200	0	0	1	0	23
MB-0244	24	0	0	0	0
MB-5588	6	1	0	17	0
MB-5628	0	24	0	0	0
MB-5633	0	0	8	1	15
MB-0169	2	0	0	22	0
MB-0253	24	0	0	0	0
MB-0226	24	0	0	0	0
MB-0278	0	0	0	1	23
MB-0266	24	0	0	0	0
MB-0577	0	24	0	0	0
MB-0156	0	0	0	23	1
MB-0531	0	0	0	24	0
MB-0245	24	0	0	0	0
MB-5641	0	24	0	0	0
MB-5640	24	0	0	0	0
MB-0534	0	0	0	24	0
MB-0230	0	0	21	1	2
MB-0433	12	0	0	12	0
MB-0109	1	23	0	0	0
MB-0304	0	24	0	0	0
MB-0369	0	24	0	0	0
MB-0627	0	1	18	1	4
MB-0492	3	21	0	0	0
MB-0147	22	2	0	0	0
MB-0442	14	0	0	10	0
MB-0111	24	0	0	0	0
MB-0634	0	0	0	23	1
MB-0329	19	5	0	0	0
MB-0280	24	0	0	0	0
MB-0490	24	0	0	0	0
MB-0885	0	0	0	19	5
MB-0178	0	24	0	0	0
MB-0242	22	2	0	0	0
MB-5624	0	0	0	0	24
MB-5593	1	0	23	0	0
MB-4010	11	11	2	0	0
MB-5605	2	22	0	0	0
MB-5636	0	24	0	0	0
MB-4529	24	0	0	0	0
MB-5566	0	0	0	0	24
MB-0268	3	21	0	0	0
MB-0160	0	0	0	23	1
MB-0275	14	0	0	10	0
MB-0127	5	0	2	16	1
MB-0045	0	0	0	13	11
MB-0414	0	0	0	0	24
MB-0259	0	0	0	0	24
MB-0396	0	0	0	0	24
MB-0874	0	0	1	0	23
MB-0179	0	0	1	18	5
MB-0526	0	24	0	0	0
MB-0586	24	0	0	0	0
MB-0508	24	0	0	0	0
MB-0288	24	0	0	0	0
MB-0269	0	0	2	2	20
MB-0582	0	0	0	0	24
MB-0901	0	0	0	0	24
MB-0000	0	0	0	24	0
MB-0535	22	2	0	0	0
MB-0469	2	21	1	0	0
MB-0478	17	0	0	7	0
MB-0547	17	7	0	0	0
MB-0499	1	0	0	19	4
MB-0170	24	0	0	0	0
MB-0403	0	0	0	21	3
MB-0464	0	1	21	1	1
MB-0421	1	23	0	0	0
MB-0623	24	0	0	0	0
MB-0241	2	2	11	2	7
MB-0163	0	0	0	0	24
MB-0149	0	0	0	0	24
MB-0153	1	0	2	6	15
MB-0350	0	0	2	0	22
MB-0512	24	0	0	0	0
MB-0020	3	0	0	20	1
MB-0046	20	4	0	0	0
MB-0134	22	2	0	0	0
MB-0495	3	0	15	3	3
MB-0470	0	0	0	20	4
MB-0872	19	0	0	5	0
MB-0661	22	2	0	0	0
MB-0339	24	0	0	0	0
MB-0264	23	1	0	0	0
MB-0175	19	5	0	0	0
MB-0303	0	0	0	0	24
MB-0172	24	0	0	0	0
MB-0125	24	0	0	0	0
MB-0340	0	1	2	2	19
MB-0234	10	14	0	0	0
MB-0487	6	0	0	18	0
MB-0305	23	0	0	1	0
MB-0390	0	1	19	0	4
MB-0502	1	0	0	6	17
MB-0663	0	0	23	0	1
MB-0130	24	0	0	0	0
MB-0289	0	0	1	10	13
MB-0129	1	0	13	1	9
MB-0343	24	0	0	0	0
MB-0458	0	0	0	24	0
MB-0570	0	24	0	0	0
MB-0281	0	0	0	24	0
MB-0488	1	0	0	19	4
MB-0655	23	0	0	1	0
MB-0235	24	0	0	0	0
MB-0484	4	20	0	0	0
MB-0436	1	0	20	0	3
MB-0299	0	0	0	0	24
MB-0877	0	24	0	0	0
MB-0097	24	0	0	0	0
MB-0897	20	0	0	4	0
MB-0095	0	24	0	0	0
MB-0227	24	0	0	0	0
MB-0353	23	1	0	0	0
MB-0522	4	0	16	4	0
MB-0543	0	16	6	1	1
MB-0196	15	0	0	8	1
MB-0646	16	8	0	0	0
MB-0293	0	0	0	24	0
MB-0552	4	0	16	2	2
MB-0260	24	0	0	0	0
MB-0326	23	0	0	1	0
MB-0256	24	0	0	0	0
MB-0539	0	0	4	5	15
MB-0626	0	24	0	0	0
MB-0355	19	5	0	0	0
MB-0211	2	1	11	0	10
MB-0124	22	2	0	0	0
MB-0510	22	0	0	2	0
MB-0365	1	18	5	0	0
MB-0290	24	0	0	0	0
MB-0113	0	0	24	0	0
MB-0620	0	0	0	24	0
MB-0282	15	0	0	9	0
MB-0228	4	0	0	20	0
MB-0578	5	0	0	19	0
MB-0479	0	0	24	0	0
MB-0263	24	0	0	0	0
MB-0509	10	13	0	1	0
MB-0110	1	0	0	19	4
MB-0279	8	0	0	16	0
MB-0168	21	0	0	3	0
MB-0588	1	0	3	19	1
MB-0462	1	1	18	2	2
MB-0262	0	24	0	0	0
MB-0907	1	0	0	23	0
MB-0554	24	0	0	0	0
MB-0418	0	24	0	0	0
MB-0193	12	12	0	0	0
MB-0652	9	14	1	0	0
MB-0638	11	0	0	13	0
MB-0188	0	7	17	0	0
MB-0617	1	0	0	21	2
MB-7225	0	0	0	0	24
MB-7141	24	0	0	0	0
MB-7234	17	7	0	0	0
MB-7089	0	0	1	0	23
MB-7030	1	0	0	5	18
MB-7004	23	1	0	0	0
MB-7119	0	0	0	0	24
MB-7263	0	24	0	0	0
MB-7012	0	0	0	0	24
MB-0174	0	0	0	0	24
MB-7182	0	24	0	0	0
MB-7039	6	0	2	16	0
MB-3797	12	12	0	0	0
MB-7112	7	16	1	0	0
MB-0308	23	0	0	1	0
MB-7230	24	0	0	0	0
MB-5452	24	0	0	0	0
MB-6195	24	0	0	0	0
MB-6317	0	24	0	0	0
MB-5460	17	3	0	3	1
MB-5464	24	0	0	0	0
MB-5552	0	24	0	0	0
MB-5547	0	0	1	0	23
MB-6189	0	24	0	0	0
MB-6122	8	0	2	12	2
MB-6192	1	22	1	0	0
MB-4820	23	1	0	0	0
MB-5527	0	0	18	2	4
MB-5167	0	24	0	0	0
MB-5465	0	0	0	0	24
MB-5453	0	0	0	24	0
MB-5471	21	3	0	0	0
MB-5127	7	17	0	0	0
MB-4313	23	0	0	1	0
MB-4823	0	0	21	3	0

## Sheet: Label ROCK CM1
	Luminal A	Luminal B	Her2-enriched	Normal-like	Basal
	X1	X2	X3	X4	X5
GSM107072	18	6	0	0	0
GSM107073	0	24	0	0	0
GSM107075	16	5	0	3	0
GSM107076	12	12	0	0	0
GSM107077	0	24	0	0	0
GSM107078	13	11	0	0	0
GSM107079	23	0	0	1	0
GSM107080	0	0	1	0	23
GSM107081	12	2	1	9	0
GSM107082	0	0	0	0	24
GSM107083	23	1	0	0	0
GSM107084	1	23	0	0	0
GSM107085	0	24	0	0	0
GSM107086	22	2	0	0	0
GSM107087	1	23	0	0	0
GSM107088	1	23	0	0	0
GSM107089	7	17	0	0	0
GSM107090	2	3	0	3	16
GSM107091	21	3	0	0	0
GSM107092	8	16	0	0	0
GSM107093	0	24	0	0	0
GSM107094	2	22	0	0	0
GSM107095	16	8	0	0	0
GSM107096	24	0	0	0	0
GSM107097	3	21	0	0	0
GSM107098	24	0	0	0	0
GSM107099	0	24	0	0	0
GSM107100	8	0	0	16	0
GSM107101	0	1	16	3	4
GSM107102	0	3	17	0	4
GSM107103	23	1	0	0	0
GSM107104	23	1	0	0	0
GSM107105	23	1	0	0	0
GSM107106	20	4	0	0	0
GSM107107	0	24	0	0	0
GSM107108	20	4	0	0	0
GSM107109	0	6	16	0	2
GSM107110	0	24	0	0	0
GSM107111	24	0	0	0	0
GSM107112	18	6	0	0	0
GSM107113	3	21	0	0	0
GSM107114	23	1	0	0	0
GSM107115	0	0	0	3	21
GSM107117	24	0	0	0	0
GSM107118	24	0	0	0	0
GSM107119	12	12	0	0	0
GSM107120	12	12	0	0	0
GSM107121	7	17	0	0	0
GSM107122	9	0	0	14	1
GSM107123	0	24	0	0	0
GSM107124	20	0	0	4	0
GSM107125	5	5	11	1	2
GSM107126	24	0	0	0	0
GSM107127	21	3	0	0	0
GSM107128	21	3	0	0	0
GSM107129	0	0	0	0	24
GSM107130	24	0	0	0	0
GSM107131	0	2	6	0	16
GSM107132	24	0	0	0	0
GSM107133	11	13	0	0	0
GSM107134	2	22	0	0	0
GSM107135	3	0	1	19	1
GSM107136	17	2	0	5	0
GSM107137	23	1	0	0	0
GSM107138	14	10	0	0	0
GSM107139	20	0	0	4	0
GSM107141	0	0	0	0	24
GSM107142	20	4	0	0	0
GSM107143	24	0	0	0	0
GSM107144	8	0	0	16	0
GSM107145	18	6	0	0	0
GSM107146	14	6	4	0	0
GSM107147	24	0	0	0	0
GSM107148	22	2	0	0	0
GSM107149	6	18	0	0	0
GSM107150	24	0	0	0	0
GSM107151	0	24	0	0	0
GSM107152	1	23	0	0	0
GSM107153	22	2	0	0	0
GSM107155	22	2	0	0	0
GSM107156	20	1	0	3	0
GSM107157	9	15	0	0	0
GSM107158	5	19	0	0	0
GSM107159	18	2	0	4	0
GSM107160	0	24	0	0	0
GSM107161	22	2	0	0	0
GSM107162	12	12	0	0	0
GSM107163	1	19	4	0	0
GSM107164	22	2	0	0	0
GSM107165	24	0	0	0	0
GSM107166	0	2	2	6	14
GSM107167	24	0	0	0	0
GSM107168	2	22	0	0	0
GSM107169	21	0	0	3	0
GSM107171	22	2	0	0	0
GSM107172	23	1	0	0	0
GSM107173	23	1	0	0	0
GSM107174	21	3	0	0	0
GSM107175	3	0	0	21	0
GSM107176	20	0	0	4	0
GSM107178	0	24	0	0	0
GSM107179	8	16	0	0	0
GSM107180	23	1	0	0	0
GSM107181	18	6	0	0	0
GSM107182	22	2	0	0	0
GSM107184	24	0	0	0	0
GSM107185	20	0	0	4	0
GSM107186	4	0	0	17	3
GSM107187	23	1	0	0	0
GSM107188	24	0	0	0	0
GSM107189	22	2	0	0	0
GSM107190	24	0	0	0	0
GSM107191	0	1	0	0	23
GSM107192	0	24	0	0	0
GSM107194	0	24	0	0	0
GSM107195	0	3	20	1	0
GSM107196	0	0	1	0	23
GSM107197	2	22	0	0	0
GSM107198	0	1	0	0	23
GSM107199	2	22	0	0	0
GSM107200	11	13	0	0	0
GSM107201	6	18	0	0	0
GSM107202	15	9	0	0	0
GSM107203	2	22	0	0	0
GSM107204	1	2	0	2	19
GSM107205	5	5	11	2	1
GSM107206	0	3	20	0	1
GSM107207	23	1	0	0	0
GSM107208	6	15	3	0	0
GSM107209	24	0	0	0	0
GSM107210	5	19	0	0	0
GSM107211	3	21	0	0	0
GSM107212	23	1	0	0	0
GSM107213	23	1	0	0	0
GSM107214	24	0	0	0	0
GSM107215	1	0	1	4	18
GSM107216	23	0	0	1	0
GSM107217	0	1	6	0	17
GSM107218	0	0	1	1	22
GSM107219	1	1	19	2	1
GSM107220	6	18	0	0	0
GSM107221	24	0	0	0	0
GSM107222	5	19	0	0	0
GSM107223	12	2	0	10	0
GSM107224	3	21	0	0	0
GSM107225	16	8	0	0	0
GSM107226	0	24	0	0	0
GSM107227	8	16	0	0	0
GSM107228	0	23	1	0	0
GSM107229	3	2	0	0	19
GSM107230	21	3	0	0	0
GSM107231	5	19	0	0	0
GSM136326	0	1	1	0	22
GSM136327	8	2	0	14	0
GSM136328	12	10	0	1	1
GSM136329	2	0	0	17	5
GSM136330	0	1	1	17	5
GSM136331	0	0	1	0	23
GSM136335	0	0	0	0	24
GSM136337	8	0	0	15	1
GSM136338	0	0	1	0	23
GSM136339	2	4	7	7	4
GSM136340	2	1	1	5	15
GSM136341	2	1	0	18	3
GSM136342	20	4	0	0	0
GSM136343	3	6	1	1	13
GSM136344	18	1	0	4	1
GSM136345	20	4	0	0	0
GSM136346	2	8	1	3	10
GSM136347	1	23	0	0	0
GSM136348	2	19	3	0	0
GSM136349	10	1	0	12	1
GSM136350	6	18	0	0	0
GSM136351	8	16	0	0	0
GSM136352	0	3	5	3	13
GSM136353	0	19	5	0	0
GSM136354	23	1	0	0	0
GSM136355	19	5	0	0	0
GSM136356	3	0	1	14	6
GSM136357	5	3	0	14	2
GSM136358	3	0	4	15	2
GSM136359	22	2	0	0	0
GSM136360	1	6	12	3	2
GSM136361	17	3	0	4	0
GSM136362	18	0	0	6	0
GSM136363	15	6	0	3	0
GSM136364	0	2	2	13	7
GSM136365	3	2	0	2	17
GSM136366	13	11	0	0	0
GSM136367	6	3	0	11	4
GSM136368	0	0	0	0	24
GSM136369	3	2	17	0	2
GSM136370	3	0	0	18	3
GSM136371	2	2	13	4	3
GSM136372	9	9	1	4	1
GSM136373	14	0	1	9	0
GSM136374	0	1	1	0	22
GSM136375	12	0	0	12	0
GSM136376	8	15	0	1	0
GSM136377	0	2	2	1	19
GSM136378	1	2	1	13	7
GSM136379	0	1	1	0	22
GSM136381	10	14	0	0	0
GSM136382	24	0	0	0	0
GSM136383	0	0	1	0	23
GSM136384	2	6	3	10	3
GSM136386	0	1	2	5	16
GSM136387	0	2	0	0	22
GSM136388	20	4	0	0	0
GSM136389	0	1	0	18	5
GSM136390	24	0	0	0	0
GSM136391	3	4	2	0	15
GSM136392	23	1	0	0	0
GSM136393	17	7	0	0	0
GSM136394	3	8	1	7	5
GSM136395	2	22	0	0	0
GSM136396	0	22	2	0	0
GSM136397	22	2	0	0	0
GSM136398	3	21	0	0	0
GSM136399	16	8	0	0	0
GSM136401	0	21	3	0	0
GSM136402	24	0	0	0	0
GSM136403	13	11	0	0	0
GSM136404	2	0	2	13	7
GSM136405	10	4	0	10	0
GSM136406	4	2	7	9	2
GSM136407	15	9	0	0	0
GSM136408	1	2	15	4	2
GSM136409	9	2	0	13	0
GSM136410	14	10	0	0	0
GSM136411	19	2	0	3	0
GSM136412	0	1	2	13	8
GSM136413	6	1	0	9	8
GSM136414	3	21	0	0	0
GSM136415	0	0	2	10	12
GSM136416	0	0	0	0	24
GSM136417	3	4	16	0	1
GSM136418	0	0	1	0	23
GSM136419	2	5	14	0	3
GSM136420	1	19	4	0	0
GSM150794	22	2	0	0	0
GSM150795	9	0	0	15	0
GSM150796	7	5	11	0	1
GSM150797	4	0	0	19	1
GSM150798	4	0	0	20	0
GSM150799	24	0	0	0	0
GSM150800	4	0	0	20	0
GSM150801	8	0	0	15	1
GSM150802	11	13	0	0	0
GSM150803	14	0	0	10	0
GSM150804	2	0	17	3	2
GSM150805	2	0	22	0	0
GSM150943	15	0	0	9	0
GSM150944	17	1	0	6	0
GSM150945	2	22	0	0	0
GSM150946	0	24	0	0	0
GSM150947	20	4	0	0	0
GSM150948	19	5	0	0	0
GSM150949	10	14	0	0	0
GSM150950	0	24	0	0	0
GSM150951	7	17	0	0	0
GSM150952	20	4	0	0	0
GSM150953	24	0	0	0	0
GSM150954	14	0	0	10	0
GSM150955	16	8	0	0	0
GSM150956	0	24	0	0	0
GSM150957	5	15	1	3	0
GSM150958	23	1	0	0	0
GSM150959	6	18	0	0	0
GSM150960	0	24	0	0	0
GSM150961	1	22	0	0	1
GSM150962	1	23	0	0	0
GSM150963	20	4	0	0	0
GSM150964	5	19	0	0	0
GSM150965	20	4	0	0	0
GSM150966	13	11	0	0	0
GSM150967	2	21	1	0	0
GSM150968	24	0	0	0	0
GSM150969	5	19	0	0	0
GSM150970	4	20	0	0	0
GSM150971	0	24	0	0	0
GSM150972	3	20	1	0	0
GSM150973	16	8	0	0	0
GSM150974	21	3	0	0	0
GSM150975	5	19	0	0	0
GSM150976	0	24	0	0	0
GSM150977	5	19	0	0	0
GSM150978	23	1	0	0	0
GSM150979	21	3	0	0	0
GSM150980	22	2	0	0	0
GSM150981	14	10	0	0	0
GSM150982	2	22	0	0	0
GSM150983	1	23	0	0	0
GSM150984	4	20	0	0	0
GSM150985	11	13	0	0	0
GSM150986	17	6	0	0	1
GSM150987	19	5	0	0	0
GSM150988	6	18	0	0	0
GSM150989	4	20	0	0	0
GSM150990	17	7	0	0	0
GSM150991	14	10	0	0	0
GSM150992	6	8	2	7	1
GSM150993	10	14	0	0	0
GSM150994	12	12	0	0	0
GSM150995	15	4	0	5	0
GSM150996	1	23	0	0	0
GSM150997	14	4	4	2	0
GSM150998	6	18	0	0	0
GSM150999	0	24	0	0	0
GSM151000	21	3	0	0	0
GSM151001	3	21	0	0	0
GSM151002	9	15	0	0	0
GSM151003	20	4	0	0	0
GSM151004	15	9	0	0	0
GSM151005	21	3	0	0	0
GSM151006	22	2	0	0	0
GSM151007	17	7	0	0	0
GSM151008	6	16	2	0	0
GSM151009	19	5	0	0	0
GSM151010	18	6	0	0	0
GSM151011	9	15	0	0	0
GSM151012	0	0	0	0	24
GSM151013	9	15	0	0	0
GSM151014	24	0	0	0	0
GSM151015	0	1	19	3	1
GSM151016	7	1	0	16	0
GSM151017	21	3	0	0	0
GSM151018	19	5	0	0	0
GSM151019	1	23	0	0	0
GSM151020	3	21	0	0	0
GSM151021	24	0	0	0	0
GSM151022	9	15	0	0	0
GSM151023	7	17	0	0	0
GSM151024	23	1	0	0	0
GSM151025	20	4	0	0	0
GSM151026	0	24	0	0	0
GSM151027	19	0	0	5	0
GSM151028	21	3	0	0	0
GSM151029	4	20	0	0	0
GSM151030	0	2	21	0	1
GSM151031	0	24	0	0	0
GSM151032	4	2	10	7	1
GSM151033	23	0	0	1	0
GSM151034	19	0	0	5	0
GSM151035	24	0	0	0	0
GSM151036	21	3	0	0	0
GSM151037	0	24	0	0	0
GSM151038	1	23	0	0	0
GSM151039	3	21	0	0	0
GSM151040	0	0	11	2	11
GSM151041	22	2	0	0	0
GSM151042	2	22	0	0	0
GSM151043	12	12	0	0	0
GSM151044	24	0	0	0	0
GSM151045	0	2	19	0	3
GSM151046	2	0	17	1	4
GSM151047	24	0	0	0	0
GSM151048	24	0	0	0	0
GSM151049	1	1	22	0	0
GSM151050	10	14	0	0	0
GSM151051	2	0	5	16	1
GSM151052	9	15	0	0	0
GSM151053	24	0	0	0	0
GSM151054	22	2	0	0	0
GSM151055	19	5	0	0	0
GSM151056	5	19	0	0	0
GSM151057	3	21	0	0	0
GSM151058	19	0	0	5	0
GSM151059	22	2	0	0	0
GSM151060	22	2	0	0	0
GSM151061	0	2	21	0	1
GSM151062	21	3	0	0	0
GSM151063	21	2	0	1	0
GSM151064	1	23	0	0	0
GSM151065	10	14	0	0	0
GSM151066	3	21	0	0	0
GSM151067	5	18	1	0	0
GSM151068	20	4	0	0	0
GSM177885	0	5	13	3	3
GSM177886	0	24	0	0	0
GSM177887	0	0	0	3	21
GSM177888	0	24	0	0	0
GSM177889	3	21	0	0	0
GSM177890	14	4	0	6	0
GSM177891	0	0	0	0	24
GSM177892	23	1	0	0	0
GSM177893	4	20	0	0	0
GSM177894	17	3	0	4	0
GSM177895	1	23	0	0	0
GSM177896	22	2	0	0	0
GSM177897	0	0	0	0	24
GSM177898	6	1	7	8	2
GSM177899	1	0	15	1	7
GSM177900	5	19	0	0	0
GSM177901	3	12	6	2	1
GSM177902	0	8	16	0	0
GSM177903	0	3	18	2	1
GSM177904	19	5	0	0	0
GSM177905	20	4	0	0	0
GSM177906	0	1	0	0	23
GSM177907	20	0	0	4	0
GSM177908	0	24	0	0	0
GSM177909	0	1	0	0	23
GSM177910	7	17	0	0	0
GSM177911	24	0	0	0	0
GSM177913	0	0	0	0	24
GSM177914	24	0	0	0	0
GSM177915	4	20	0	0	0
GSM177916	1	23	0	0	0
GSM177917	6	18	0	0	0
GSM177918	3	0	18	2	1
GSM177919	21	3	0	0	0
GSM177920	1	23	0	0	0
GSM177921	22	2	0	0	0
GSM177922	23	1	0	0	0
GSM177923	0	0	0	0	24
GSM177924	19	5	0	0	0
GSM177925	0	0	1	0	23
GSM177926	0	24	0	0	0
GSM177927	0	1	22	0	1
GSM177928	20	4	0	0	0
GSM177929	0	23	1	0	0
GSM177930	24	0	0	0	0
GSM177931	22	1	0	1	0
GSM177932	18	4	0	2	0
GSM177933	2	22	0	0	0
GSM177934	0	24	0	0	0
GSM177935	0	0	3	1	20
GSM177936	22	2	0	0	0
GSM177937	0	1	5	0	18
GSM177938	16	0	0	8	0
GSM177939	0	2	20	0	2
GSM177940	18	6	0	0	0
GSM177941	20	4	0	0	0
GSM177942	0	24	0	0	0
GSM177943	0	0	0	0	24
GSM177944	0	1	3	0	20
GSM177945	8	16	0	0	0
GSM177946	0	24	0	0	0
GSM177947	16	8	0	0	0
GSM177948	18	6	0	0	0
GSM177950	8	16	0	0	0
GSM177952	13	11	0	0	0
GSM177953	4	20	0	0	0
GSM177954	0	0	0	0	24
GSM177955	22	2	0	0	0
GSM177956	0	1	2	0	21
GSM177957	13	8	0	3	0
GSM177958	0	24	0	0	0
GSM177959	0	5	15	1	3
GSM177960	2	22	0	0	0
GSM177961	21	2	0	1	0
GSM177963	0	0	0	2	22
GSM177965	22	2	0	0	0
GSM177966	0	0	0	0	24
GSM177967	23	1	0	0	0
GSM177968	4	8	1	6	5
GSM177969	21	3	0	0	0
GSM177970	0	0	0	0	24
GSM177971	5	19	0	0	0
GSM177972	14	3	0	7	0
GSM177973	1	23	0	0	0
GSM177974	9	15	0	0	0
GSM177975	0	0	1	0	23
GSM177976	17	1	0	6	0
GSM177977	0	2	18	0	4
GSM177978	0	1	1	0	22
GSM177979	0	0	17	0	7
GSM177980	0	1	1	0	22
GSM177981	0	24	0	0	0
GSM177982	15	4	0	5	0
GSM177983	0	24	0	0	0
GSM177984	22	2	0	0	0
GSM177985	0	0	1	2	21
GSM177986	2	16	5	0	1
GSM177988	0	5	9	7	3
GSM177989	22	2	0	0	0
GSM177990	5	19	0	0	0
GSM177991	9	0	0	15	0
GSM177992	22	2	0	0	0
GSM177993	1	0	0	5	18
GSM177995	6	18	0	0	0
GSM177996	24	0	0	0	0
GSM177997	16	8	0	0	0
GSM177998	15	9	0	0	0
GSM177999	0	0	1	0	23
GSM178000	19	5	0	0	0
GSM178001	0	0	0	0	24
GSM178002	21	3	0	0	0
GSM178003	0	1	0	6	17
GSM178004	5	15	1	3	0
GSM178005	2	22	0	0	0
GSM178006	0	0	18	1	5
GSM178007	21	3	0	0	0
GSM178008	6	18	0	0	0
GSM178009	0	2	16	1	5
GSM178010	0	7	16	0	1
GSM178011	0	0	1	11	12
GSM178012	0	0	0	0	24
GSM178013	0	0	0	0	24
GSM178014	7	17	0	0	0
GSM178015	22	2	0	0	0
GSM178016	23	1	0	0	0
GSM178017	0	17	7	0	0
GSM178018	5	19	0	0	0
GSM178019	24	0	0	0	0
GSM178020	0	21	3	0	0
GSM178021	2	6	0	3	13
GSM178022	22	2	0	0	0
GSM178024	13	0	0	11	0
GSM178025	0	24	0	0	0
GSM178026	5	19	0	0	0
GSM178027	20	4	0	0	0
GSM178028	0	0	13	3	8
GSM178029	18	1	0	5	0
GSM178030	18	6	0	0	0
GSM178031	5	19	0	0	0
GSM178032	24	0	0	0	0
GSM178034	0	0	0	0	24
GSM178035	0	0	0	0	24
GSM178036	22	2	0	0	0
GSM178037	9	15	0	0	0
GSM178038	3	21	0	0	0
GSM178039	24	0	0	0	0
GSM178040	23	1	0	0	0
GSM178041	23	1	0	0	0
GSM178042	19	5	0	0	0
GSM178043	22	0	0	1	1
GSM178044	22	2	0	0	0
GSM178045	22	2	0	0	0
GSM178046	4	20	0	0	0
GSM178047	22	2	0	0	0
GSM178049	15	9	0	0	0
GSM178050	0	24	0	0	0
GSM178051	17	0	0	7	0
GSM178052	3	2	18	0	1
GSM178053	2	21	1	0	0
GSM178054	24	0	0	0	0
GSM178055	0	1	6	0	17
GSM178056	2	22	0	0	0
GSM178057	3	21	0	0	0
GSM178058	0	20	3	0	1
GSM178059	0	1	1	0	22
GSM178060	0	24	0	0	0
GSM178061	8	16	0	0	0
GSM178062	20	2	1	1	0
GSM178063	0	2	17	0	5
GSM178064	2	22	0	0	0
GSM178065	0	2	19	0	3
GSM178066	3	6	13	0	2
GSM178068	0	24	0	0	0
GSM178069	0	24	0	0	0
GSM178070	11	13	0	0	0
GSM178071	21	3	0	0	0
GSM178072	10	14	0	0	0
GSM178073	0	2	19	0	3
GSM178074	2	22	0	0	0
GSM178075	0	1	2	0	21
GSM178076	20	3	0	0	1
GSM178077	16	8	0	0	0
GSM178078	0	0	0	0	24
GSM178079	0	0	0	0	24
GSM178080	2	22	0	0	0
GSM178081	19	0	0	4	1
GSM178082	1	0	0	4	19
GSM26804	0	24	0	0	0
GSM26867	0	24	0	0	0
GSM26868	2	22	0	0	0
GSM26869	22	2	0	0	0
GSM26871	0	0	0	0	24
GSM26872	7	17	0	0	0
GSM26873	14	10	0	0	0
GSM26874	16	8	0	0	0
GSM26875	0	24	0	0	0
GSM26876	10	14	0	0	0
GSM26877	10	14	0	0	0
GSM26878	2	5	17	0	0
GSM26879	0	24	0	0	0
GSM26880	2	3	11	1	7
GSM26881	1	23	0	0	0
GSM26882	1	0	0	3	20
GSM26883	2	4	18	0	0
GSM26884	0	0	0	0	24
GSM26885	24	0	0	0	0
GSM26887	1	12	8	0	3
GSM26888	1	0	0	3	20
GSM26889	0	0	0	3	21
GSM26890	1	22	1	0	0
GSM26891	2	22	0	0	0
GSM26892	3	6	0	3	12
GSM26893	0	1	0	0	23
GSM26894	1	22	1	0	0
GSM26895	0	0	2	0	22
GSM26896	12	7	0	5	0
GSM26897	4	20	0	0	0
GSM26898	0	0	0	0	24
GSM26900	3	3	13	0	5
GSM26901	0	24	0	0	0
GSM26902	0	0	1	0	23
GSM26903	1	4	17	2	0
GSM26904	0	24	0	0	0
GSM26905	0	0	1	0	23
GSM26906	0	1	0	0	23
GSM26907	2	22	0	0	0
GSM26908	0	2	6	3	13
GSM26909	12	12	0	0	0
GSM26910	2	1	21	0	0
GSM26911	0	24	0	0	0
GSM26912	1	8	0	3	12
GSM26913	23	1	0	0	0
GSM26914	5	19	0	0	0
GSM282373	0	4	20	0	0
GSM282374	5	19	0	0	0
GSM282375	24	0	0	0	0
GSM282376	20	4	0	0	0
GSM282377	2	22	0	0	0
GSM282378	10	14	0	0	0
GSM282379	0	24	0	0	0
GSM282380	2	22	0	0	0
GSM282381	22	2	0	0	0
GSM282382	24	0	0	0	0
GSM282383	23	1	0	0	0
GSM282384	21	3	0	0	0
GSM282385	0	0	0	0	24
GSM282386	6	18	0	0	0
GSM282387	23	0	0	1	0
GSM282388	22	2	0	0	0
GSM282389	6	18	0	0	0
GSM282390	22	2	0	0	0
GSM282391	22	2	0	0	0
GSM282392	0	24	0	0	0
GSM282393	20	0	0	4	0
GSM282394	1	23	0	0	0
GSM282395	20	4	0	0	0
GSM282396	0	24	0	0	0
GSM282397	6	18	0	0	0
GSM282399	0	24	0	0	0
GSM282400	15	4	0	5	0
GSM282401	3	0	0	21	0
GSM282402	22	2	0	0	0
GSM282403	2	22	0	0	0
GSM282404	22	2	0	0	0
GSM282405	7	17	0	0	0
GSM282406	14	10	0	0	0
GSM282407	21	3	0	0	0
GSM282408	22	2	0	0	0
GSM282410	0	6	17	0	1
GSM282411	24	0	0	0	0
GSM282412	20	4	0	0	0
GSM282413	0	0	0	0	24
GSM282414	18	6	0	0	0
GSM282415	5	19	0	0	0
GSM282416	22	2	0	0	0
GSM282417	10	14	0	0	0
GSM282420	14	0	0	10	0
GSM282421	20	4	0	0	0
GSM282422	22	2	0	0	0
GSM282423	24	0	0	0	0
GSM282424	7	17	0	0	0
GSM282425	22	2	0	0	0
GSM282426	17	7	0	0	0
GSM282427	2	3	0	0	19
GSM282428	0	24	0	0	0
GSM282430	12	12	0	0	0
GSM282431	22	2	0	0	0
GSM282432	24	0	0	0	0
GSM282433	22	1	0	1	0
GSM282434	16	0	0	8	0
GSM282435	1	1	0	0	22
GSM282436	13	5	1	5	0
GSM282437	17	7	0	0	0
GSM282438	24	0	0	0	0
GSM282439	22	2	0	0	0
GSM282440	0	0	0	0	24
GSM282441	17	7	0	0	0
GSM282442	11	13	0	0	0
GSM282443	22	2	0	0	0
GSM282444	16	8	0	0	0
GSM282445	20	0	0	4	0
GSM282446	1	0	1	5	17
GSM282447	23	1	0	0	0
GSM282448	7	0	3	12	2
GSM282449	24	0	0	0	0
GSM282450	0	23	1	0	0
GSM282451	23	1	0	0	0
GSM282452	21	3	0	0	0
GSM282453	13	1	0	10	0
GSM282454	0	0	0	0	24
GSM282455	10	14	0	0	0
GSM282456	24	0	0	0	0
GSM282457	0	3	16	2	3
GSM282458	24	0	0	0	0
GSM282459	20	0	0	4	0
GSM282461	4	20	0	0	0
GSM282462	22	2	0	0	0
GSM282463	24	0	0	0	0
GSM282464	0	0	1	0	23
GSM282465	0	1	0	0	23
GSM282466	24	0	0	0	0
GSM282467	12	0	0	12	0
GSM282468	3	21	0	0	0
GSM282469	19	1	0	4	0
GSM282470	6	0	0	18	0
GSM282471	0	0	0	0	24
GSM282472	0	24	0	0	0
GSM282473	3	21	0	0	0
GSM282474	3	3	0	3	15
GSM282475	1	22	1	0	0
GSM282476	6	18	0	0	0
GSM282477	2	5	17	0	0
GSM282478	6	1	0	13	4
GSM282479	14	10	0	0	0
GSM282480	1	23	0	0	0
GSM282481	10	14	0	0	0
GSM282482	0	1	0	12	11
GSM282483	3	17	2	0	2
GSM282484	3	21	0	0	0
GSM282485	21	3	0	0	0
GSM282486	21	3	0	0	0
GSM282487	14	10	0	0	0
GSM282488	5	19	0	0	0
GSM282489	2	2	17	1	2
GSM282490	9	15	0	0	0
GSM282491	0	24	0	0	0
GSM282492	20	4	0	0	0
GSM282493	0	3	17	1	3
GSM282494	20	2	0	2	0
GSM282495	0	24	0	0	0
GSM282496	23	1	0	0	0
GSM282497	3	1	0	0	20
GSM282498	23	1	0	0	0
GSM282499	12	12	0	0	0
GSM282500	16	0	0	8	0
GSM282501	16	1	0	7	0
GSM282502	0	6	17	0	1
GSM282503	23	1	0	0	0
GSM282504	20	4	0	0	0
GSM282506	7	17	0	0	0
GSM282507	0	24	0	0	0
GSM282508	0	0	0	0	24
GSM282509	20	0	0	4	0
GSM282510	3	20	0	1	0
GSM282511	3	11	0	4	6
GSM282512	24	0	0	0	0
GSM282513	9	15	0	0	0
GSM282514	23	1	0	0	0
GSM282515	9	15	0	0	0
GSM282516	14	10	0	0	0
GSM282517	24	0	0	0	0
GSM282519	0	24	0	0	0
GSM282520	4	20	0	0	0
GSM282521	17	0	0	7	0
GSM282522	8	16	0	0	0
GSM282523	15	9	0	0	0
GSM282524	22	2	0	0	0
GSM282525	0	24	0	0	0
GSM282526	4	20	0	0	0
GSM282527	9	15	0	0	0
GSM282528	0	0	0	0	24
GSM282529	22	2	0	0	0
GSM282530	17	7	0	0	0
GSM282531	21	3	0	0	0
GSM282532	20	4	0	0	0
GSM282533	24	0	0	0	0
GSM282534	22	2	0	0	0
GSM282536	22	2	0	0	0
GSM282537	6	18	0	0	0
GSM282538	0	24	0	0	0
GSM282539	0	24	0	0	0
GSM282540	24	0	0	0	0
GSM282541	24	0	0	0	0
GSM282542	20	4	0	0	0
GSM282543	0	24	0	0	0
GSM282545	1	23	0	0	0
GSM282546	21	3	0	0	0
GSM282547	24	0	0	0	0
GSM282548	22	2	0	0	0
GSM282549	21	3	0	0	0
GSM282550	22	2	0	0	0
GSM282551	0	0	0	0	24
GSM282552	4	20	0	0	0
GSM282553	16	7	1	0	0
GSM282556	2	22	0	0	0
GSM282557	11	13	0	0	0
GSM282558	5	19	0	0	0
GSM282559	17	0	0	7	0
GSM282560	22	2	0	0	0
GSM282561	0	24	0	0	0
GSM282562	23	1	0	0	0
GSM282563	21	2	0	1	0
GSM282564	24	0	0	0	0
GSM282565	0	0	0	0	24
GSM282566	24	0	0	0	0
GSM282567	3	21	0	0	0
GSM282568	0	24	0	0	0
GSM282569	0	0	3	0	21
GSM282570	0	24	0	0	0
GSM282572	4	20	0	0	0
GSM36777	20	4	0	0	0
GSM36778	3	21	0	0	0
GSM36779	22	2	0	0	0
GSM36780	3	0	18	1	2
GSM36781	0	2	22	0	0
GSM36782	23	1	0	0	0
GSM36783	23	1	0	0	0
GSM36784	16	8	0	0	0
GSM36785	0	24	0	0	0
GSM36788	0	1	6	0	17
GSM36789	4	20	0	0	0
GSM36790	22	2	0	0	0
GSM36791	22	2	0	0	0
GSM36792	1	23	0	0	0
GSM36793	7	1	0	13	3
GSM36796	22	2	0	0	0
GSM36797	0	1	0	0	23
GSM36798	0	1	0	0	23
GSM36799	2	22	0	0	0
GSM36800	1	23	0	0	0
GSM36801	0	24	0	0	0
GSM36803	11	13	0	0	0
GSM36804	23	1	0	0	0
GSM36805	2	22	0	0	0
GSM36806	22	2	0	0	0
GSM36807	16	0	0	8	0
GSM36808	17	3	0	4	0
GSM36809	0	1	3	1	19
GSM36810	6	18	0	0	0
GSM36811	20	3	0	1	0
GSM36813	14	10	0	0	0
GSM36814	16	5	0	3	0
GSM36816	3	15	0	4	2
GSM36817	5	6	0	7	6
GSM36818	5	19	0	0	0
GSM36819	21	3	0	0	0
GSM36820	0	24	0	0	0
GSM36821	1	23	0	0	0
GSM36822	0	1	1	0	22
GSM36824	0	0	1	0	23
GSM36825	23	1	0	0	0
GSM36826	11	13	0	0	0
GSM36827	0	0	0	0	24
GSM36828	0	1	0	0	23
GSM36829	5	19	0	0	0
GSM36830	12	12	0	0	0
GSM36831	24	0	0	0	0
GSM36832	21	3	0	0	0
GSM36833	0	0	23	0	1
GSM36834	0	24	0	0	0
GSM36835	1	3	0	0	20
GSM36836	20	4	0	0	0
GSM36837	2	22	0	0	0
GSM36838	4	20	0	0	0
GSM36839	24	0	0	0	0
GSM36841	2	22	0	0	0
GSM36842	17	5	0	2	0
GSM36843	7	17	0	0	0
GSM36844	4	20	0	0	0
GSM36845	20	4	0	0	0
GSM36846	0	1	1	0	22
GSM36847	0	0	1	2	21
GSM36848	23	1	0	0	0
GSM36849	15	9	0	0	0
GSM36850	20	4	0	0	0
GSM36851	1	1	10	10	2
GSM36852	7	17	0	0	0
GSM36853	21	3	0	0	0
GSM36854	15	8	0	1	0
GSM36855	0	0	1	0	23
GSM36856	6	18	0	0	0
GSM36857	5	19	0	0	0
GSM36858	1	23	0	0	0
GSM36859	22	2	0	0	0
GSM36860	0	24	0	0	0
GSM36861	22	2	0	0	0
GSM36862	0	0	0	0	24
GSM36863	3	21	0	0	0
GSM36864	4	20	0	0	0
GSM36865	0	1	1	0	22
GSM36866	19	5	0	0	0
GSM36867	5	19	0	0	0
GSM36868	22	2	0	0	0
GSM36870	0	24	0	0	0
GSM36871	22	2	0	0	0
GSM36872	4	19	1	0	0
GSM36873	0	24	0	0	0
GSM36874	18	6	0	0	0
GSM36875	0	1	1	0	22
GSM36876	0	0	1	0	23
GSM36877	0	24	0	0	0
GSM36878	0	24	0	0	0
GSM36879	6	11	6	0	1
GSM36880	17	7	0	0	0
GSM36881	1	23	0	0	0
GSM36882	24	0	0	0	0
GSM36883	17	2	0	5	0
GSM36884	1	23	0	0	0
GSM36885	23	1	0	0	0
GSM36886	4	20	0	0	0
GSM36887	17	7	0	0	0
GSM36888	4	20	0	0	0
GSM36889	18	4	0	2	0
GSM36890	17	1	4	1	1
GSM36891	0	0	1	0	23
GSM36892	8	16	0	0	0
GSM36893	10	14	0	0	0
GSM36894	17	0	0	7	0
GSM36895	9	15	0	0	0
GSM36896	20	4	0	0	0
GSM36897	14	10	0	0	0
GSM36898	19	2	0	3	0
GSM36899	0	24	0	0	0
GSM36901	0	0	0	0	24
GSM36902	3	0	1	16	4
GSM36903	0	24	0	0	0
GSM36904	13	5	4	2	0
GSM36905	1	1	5	15	2
GSM36906	0	4	19	0	1
GSM36907	15	9	0	0	0
GSM36908	0	24	0	0	0
GSM36909	6	2	3	13	0
GSM36910	23	1	0	0	0
GSM36911	4	20	0	0	0
GSM36912	1	0	0	0	23
GSM36914	22	2	0	0	0
GSM36915	2	2	6	13	1
GSM36916	24	0	0	0	0
GSM36917	18	6	0	0	0
GSM36918	8	1	0	15	0
GSM36919	18	6	0	0	0
GSM36920	4	20	0	0	0
GSM36921	1	23	0	0	0
GSM36922	4	20	0	0	0
GSM36923	0	1	0	4	19
GSM36924	3	21	0	0	0
GSM36925	23	1	0	0	0
GSM36926	3	7	13	0	1
GSM36927	0	0	0	0	24
GSM36928	20	4	0	0	0
GSM36930	2	22	0	0	0
GSM36931	0	1	0	0	23
GSM36932	21	0	0	3	0
GSM36933	2	22	0	0	0
GSM36934	2	22	0	0	0
GSM36935	0	0	0	0	24
GSM36937	0	0	0	0	24
GSM36938	1	23	0	0	0
GSM36939	0	24	0	0	0
GSM36940	0	0	0	0	24
GSM36941	0	0	1	0	23
GSM36942	22	2	0	0	0
GSM36944	23	1	0	0	0
GSM36945	22	2	0	0	0
GSM36946	0	24	0	0	0
GSM36947	0	24	0	0	0
GSM36948	2	22	0	0	0
GSM36949	0	1	4	0	19
GSM36950	20	4	0	0	0
GSM36951	3	21	0	0	0
GSM36952	0	0	0	0	24
GSM36953	7	9	2	3	3
GSM36954	0	24	0	0	0
GSM36955	1	5	15	3	0
GSM36957	23	1	0	0	0
GSM36958	19	0	0	5	0
GSM36959	0	0	1	0	23
GSM36960	0	0	0	0	24
GSM36961	1	1	15	3	4
GSM36962	21	1	0	2	0
GSM36963	5	19	0	0	0
GSM36964	1	5	14	0	4
GSM36965	19	5	0	0	0
GSM36966	0	0	0	0	24
GSM36967	1	23	0	0	0
GSM36968	2	0	20	0	2
GSM36969	0	0	0	0	24
GSM36970	22	2	0	0	0
GSM36971	15	9	0	0	0
GSM36972	7	17	0	0	0
GSM36973	8	16	0	0	0
GSM36974	0	24	0	0	0
GSM36975	4	7	10	3	0
GSM36976	17	7	0	0	0
GSM36977	0	0	2	0	22
GSM36978	4	0	8	12	0
GSM36979	0	24	0	0	0
GSM36980	21	3	0	0	0
GSM36981	0	0	1	0	23
GSM36982	14	0	0	10	0
GSM36983	23	1	0	0	0
GSM36984	3	21	0	0	0
GSM36985	4	20	0	0	0
GSM36986	19	5	0	0	0
GSM36987	18	6	0	0	0
GSM36988	7	17	0	0	0
GSM36989	0	24	0	0	0
GSM36990	21	3	0	0	0
GSM36991	0	0	0	1	23
GSM36994	22	2	0	0	0
GSM36995	1	23	0	0	0
GSM36996	4	11	6	0	3
GSM36997	0	24	0	0	0
GSM36998	22	2	0	0	0
GSM36999	17	7	0	0	0
GSM37000	22	2	0	0	0
GSM37001	23	1	0	0	0
GSM37002	0	0	1	0	23
GSM37003	0	24	0	0	0
GSM37004	3	21	0	0	0
GSM37005	20	4	0	0	0
GSM37006	5	19	0	0	0
GSM37007	0	24	0	0	0
GSM37008	14	10	0	0	0
GSM37009	16	8	0	0	0
GSM37010	12	12	0	0	0
GSM37011	6	18	0	0	0
GSM37012	22	2	0	0	0
GSM37013	15	9	0	0	0
GSM37014	0	24	0	0	0
GSM37015	23	1	0	0	0
GSM37016	0	2	21	0	1
GSM37017	0	1	1	0	22
GSM37018	1	23	0	0	0
GSM37019	19	5	0	0	0
GSM37020	1	19	4	0	0
GSM37021	0	0	0	0	24
GSM37022	0	1	0	0	23
GSM37023	1	8	12	1	2
GSM37024	20	4	0	0	0
GSM37025	13	11	0	0	0
GSM37026	18	6	0	0	0
GSM37027	11	13	0	0	0
GSM37028	22	2	0	0	0
GSM37029	2	22	0	0	0
GSM37031	0	24	0	0	0
GSM37032	19	5	0	0	0
GSM37033	24	0	0	0	0
GSM37034	2	8	14	0	0
GSM37035	0	24	0	0	0
GSM37036	5	19	0	0	0
GSM37037	2	22	0	0	0
GSM37038	1	23	0	0	0
GSM37039	20	4	0	0	0
GSM37040	0	1	3	1	19
GSM37041	22	1	0	1	0
GSM37042	0	2	18	3	1
GSM37043	0	1	0	0	23
GSM37044	12	2	9	0	1
GSM37045	0	1	5	0	18
GSM37046	6	18	0	0	0
GSM37047	0	1	3	1	19
GSM37048	1	0	0	6	17
GSM37049	12	12	0	0	0
GSM37051	0	0	0	11	13
GSM37052	1	1	1	10	11
GSM37054	2	6	15	0	1
GSM37055	1	17	6	0	0
GSM37056	18	0	0	6	0
GSM37057	3	21	0	0	0
GSM37058	15	9	0	0	0
GSM37059	22	2	0	0	0
GSM37060	20	0	0	4	0
GSM37061	22	2	0	0	0
GSM37062	0	24	0	0	0
GSM50034	0	19	4	0	1
GSM50035	0	0	0	0	24
GSM50036	0	24	0	0	0
GSM50037	0	24	0	0	0
GSM50038	1	23	0	0	0
GSM50039	0	24	0	0	0
GSM50040	0	0	0	0	24
GSM50041	0	0	0	0	24
GSM50042	2	6	0	1	15
GSM50043	0	24	0	0	0
GSM50044	2	22	0	0	0
GSM50045	0	0	0	3	21
GSM50046	0	0	0	0	24
GSM50047	11	13	0	0	0
GSM50048	0	0	0	3	21
GSM50049	24	0	0	0	0
GSM50050	0	0	1	2	21
GSM50051	19	0	0	5	0
GSM50052	0	0	0	3	21
GSM50053	17	7	0	0	0
GSM50054	0	0	1	0	23
GSM50055	0	0	2	2	20
GSM50056	1	23	0	0	0
GSM50057	0	0	0	0	24
GSM50058	0	1	9	7	7
GSM50059	0	24	0	0	0
GSM50060	0	9	14	0	1
GSM50061	0	1	8	10	5
GSM50062	0	24	0	0	0
GSM50063	0	0	3	2	19
GSM50064	0	1	0	18	5
GSM50065	7	17	0	0	0
GSM50066	1	4	9	8	2
GSM50067	0	0	0	0	24
GSM50068	14	9	1	0	0
GSM50069	0	1	0	5	18
GSM50070	0	0	22	0	2
GSM50071	8	0	12	2	2
GSM50072	4	1	13	5	1
GSM50073	0	1	0	1	22
GSM50074	21	0	0	3	0
GSM50075	8	0	6	8	2
GSM50076	22	2	0	0	0
GSM50077	22	2	0	0	0
GSM50078	0	1	1	4	18
GSM50079	0	0	0	0	24
GSM50080	23	1	0	0	0
GSM50081	22	2	0	0	0
GSM50082	13	0	0	11	0
GSM50083	3	21	0	0	0
GSM50084	3	21	0	0	0
GSM50085	0	24	0	0	0
GSM50086	0	22	2	0	0
GSM50087	1	23	0	0	0
GSM50088	18	0	0	6	0
GSM50089	4	0	0	20	0
GSM50090	13	11	0	0	0
GSM50091	1	23	0	0	0
GSM50092	0	21	3	0	0
GSM50093	0	0	0	0	24
GSM50094	0	0	0	0	24
GSM50095	10	14	0	0	0
GSM50096	0	1	1	2	20
GSM50097	8	16	0	0	0
GSM50098	23	1	0	0	0
GSM50099	2	21	1	0	0
GSM50100	18	0	0	6	0
GSM50101	7	17	0	0	0
GSM50102	0	0	0	0	24
GSM50103	1	0	4	0	19
GSM50105	5	19	0	0	0
GSM50106	0	0	3	0	21
GSM50107	0	0	0	0	24
GSM50109	8	16	0	0	0
GSM50110	3	9	2	4	6
GSM50111	17	7	0	0	0
GSM50112	1	0	0	0	23
GSM50113	23	1	0	0	0
GSM50115	9	15	0	0	0
GSM50116	19	0	0	5	0
GSM50117	0	23	1	0	0
GSM50118	1	23	0	0	0
GSM50119	0	0	0	0	24
GSM50120	18	6	0	0	0
GSM50121	4	20	0	0	0
GSM50122	6	18	0	0	0
GSM50123	0	1	1	0	22
GSM50124	17	7	0	0	0
GSM50125	0	1	23	0	0
GSM50126	16	8	0	0	0
GSM50127	2	17	4	1	0
GSM50128	4	20	0	0	0
GSM50129	7	17	0	0	0
GSM50130	0	3	17	1	3
GSM50131	1	23	0	0	0
GSM505342	0	4	19	0	1
GSM505350	2	9	9	3	1
GSM505377	0	1	22	0	1
GSM505379	2	22	0	0	0
GSM505381	2	1	19	0	2
GSM505383	21	3	0	0	0
GSM505385	0	18	6	0	0
GSM505387	0	1	23	0	0
GSM505389	0	24	0	0	0
GSM505391	3	21	0	0	0
GSM505393	3	21	0	0	0
GSM505395	0	24	0	0	0
GSM505399	7	17	0	0	0
GSM505401	0	3	20	0	1
GSM505403	24	0	0	0	0
GSM505405	4	20	0	0	0
GSM505407	13	11	0	0	0
GSM505409	0	24	0	0	0
GSM505413	0	0	1	3	20
GSM505427	1	23	0	0	0
GSM505428	0	1	0	0	23
GSM505429	22	2	0	0	0
GSM505430	1	23	0	0	0
GSM505431	1	23	0	0	0
GSM505432	19	1	0	4	0
GSM505433	21	3	0	0	0
GSM505434	0	1	21	2	0
GSM505435	0	4	8	7	5
GSM505437	0	5	19	0	0
GSM505438	0	0	0	0	24
GSM505439	0	2	9	7	6
GSM505440	19	2	0	3	0
GSM505441	1	23	0	0	0
GSM505442	0	24	0	0	0
GSM505443	23	1	0	0	0
GSM505444	1	23	0	0	0
GSM505445	0	1	23	0	0
GSM505446	21	3	0	0	0
GSM505447	0	5	18	1	0
GSM505448	24	0	0	0	0
GSM505449	5	19	0	0	0
GSM505450	0	14	10	0	0
GSM505451	18	6	0	0	0
GSM505452	10	14	0	0	0
GSM505453	2	22	0	0	0
GSM505454	0	0	0	0	24
GSM505455	0	24	0	0	0
GSM505456	2	22	0	0	0
GSM505457	0	24	0	0	0
GSM505458	18	0	0	6	0
GSM505459	0	23	1	0	0
GSM505460	0	0	0	0	24
GSM505461	0	24	0	0	0
GSM505462	0	0	0	0	24
GSM505463	0	23	0	0	1
GSM505464	24	0	0	0	0
GSM505465	11	13	0	0	0
GSM505466	0	0	0	3	21
GSM505467	0	0	0	3	21
GSM505468	5	19	0	0	0
GSM505469	12	12	0	0	0
GSM505471	0	24	0	0	0
GSM505472	24	0	0	0	0
GSM505473	0	24	0	0	0
GSM505474	0	24	0	0	0
GSM505475	0	0	0	4	20
GSM505476	0	24	0	0	0
GSM505477	7	17	0	0	0
GSM505478	6	0	1	15	2
GSM505479	0	24	0	0	0
GSM505480	0	24	0	0	0
GSM505481	2	22	0	0	0
GSM505482	12	11	0	1	0
GSM505483	3	21	0	0	0
GSM505484	5	19	0	0	0
GSM505485	1	23	0	0	0
GSM505486	1	23	0	0	0
GSM505487	0	2	21	1	0
GSM505488	16	8	0	0	0
GSM505490	0	2	6	4	12
GSM505503	0	1	1	0	22
GSM505504	0	0	10	2	12
GSM505505	0	5	19	0	0
GSM505506	12	12	0	0	0
GSM505507	18	0	0	6	0
GSM505508	16	0	0	7	1
GSM505509	23	1	0	0	0
GSM505510	4	18	0	1	1
GSM505511	2	1	20	0	1
GSM505512	21	3	0	0	0
GSM505513	0	0	1	0	23
GSM505514	0	1	3	1	19
GSM505515	20	4	0	0	0
GSM505516	0	1	0	0	23
GSM505517	14	0	0	9	1
GSM505518	0	17	3	0	4
GSM505519	2	22	0	0	0
GSM505520	24	0	0	0	0
GSM505521	0	0	24	0	0
GSM505522	1	23	0	0	0
GSM505523	19	0	0	5	0
GSM505524	0	0	22	2	0
GSM505525	8	10	1	4	1
GSM505526	0	3	19	0	2
GSM505527	0	1	17	1	5
GSM505528	0	0	1	3	20
GSM505529	23	1	0	0	0
GSM505530	22	2	0	0	0
GSM505531	0	2	18	3	1
GSM505532	2	22	0	0	0
GSM505533	0	1	0	13	10
GSM505534	0	2	18	1	3
GSM505535	0	0	0	0	24
GSM505536	6	0	0	18	0
GSM505537	10	4	2	8	0
GSM505538	22	2	0	0	0
GSM505539	24	0	0	0	0
GSM505540	0	1	0	3	20
GSM505541	1	0	0	0	23
GSM505542	1	23	0	0	0
GSM505543	0	0	0	0	24
GSM505544	17	7	0	0	0
GSM505545	0	1	1	0	22
GSM505546	0	1	23	0	0
GSM505547	3	21	0	0	0
GSM505548	0	1	1	7	15
GSM505549	18	1	0	5	0
GSM505550	22	2	0	0	0
GSM505551	18	4	0	1	1
GSM505552	0	3	2	2	17
GSM505553	0	1	0	1	22
GSM505554	0	3	9	1	11
GSM505555	0	0	1	3	20
GSM505556	5	19	0	0	0
GSM505557	17	7	0	0	0
GSM505558	3	1	12	5	3
GSM505559	1	23	0	0	0
GSM505560	0	24	0	0	0
GSM505561	0	0	0	1	23
GSM505562	0	1	0	0	23
GSM505563	0	1	1	5	17
GSM505564	0	0	0	0	24
GSM505565	9	15	0	0	0
GSM505566	0	0	0	0	24
GSM505567	1	23	0	0	0
GSM505568	2	22	0	0	0
GSM505569	24	0	0	0	0
GSM505570	2	2	20	0	0
GSM505571	0	24	0	0	0
GSM505572	0	0	0	4	20
GSM505573	0	24	0	0	0
GSM505574	0	0	4	0	20
GSM505575	0	0	1	0	23
GSM505576	8	16	0	0	0
GSM505577	0	24	0	0	0
GSM505578	24	0	0	0	0
GSM505579	8	16	0	0	0
GSM505580	0	0	0	4	20
GSM505581	23	1	0	0	0
GSM505582	2	22	0	0	0
GSM505583	0	0	0	0	24
GSM505584	0	0	0	0	24
GSM505585	0	24	0	0	0
GSM505586	2	1	15	4	2
GSM505587	24	0	0	0	0
GSM505588	1	0	2	2	19
GSM505589	24	0	0	0	0
GSM505590	1	23	0	0	0
GSM505591	0	24	0	0	0
GSM505592	0	0	6	0	18
GSM505593	5	19	0	0	0
GSM505594	2	19	1	1	1
GSM505595	23	1	0	0	0
GSM505596	1	23	0	0	0
GSM505597	4	20	0	0	0
GSM505598	24	0	0	0	0
GSM505599	21	2	0	1	0
GSM505600	19	2	0	3	0
GSM505601	4	20	0	0	0
GSM505602	0	24	0	0	0
GSM505603	20	4	0	0	0
GSM505604	3	21	0	0	0
GSM505605	0	24	0	0	0
GSM512539	7	0	0	16	1
GSM512540	6	0	0	17	1
GSM512541	10	1	0	13	0
GSM512543	9	0	0	15	0
GSM512544	8	1	0	15	0
GSM512545	8	0	0	16	0
GSM512546	7	0	0	17	0
GSM512547	7	0	0	17	0
GSM512549	9	0	0	15	0
GSM512550	8	0	0	16	0
GSM512551	21	0	0	3	0
GSM512552	8	0	0	15	1
GSM512553	11	0	0	13	0
GSM512554	8	0	0	16	0
GSM512555	5	1	0	18	0
GSM512556	2	0	0	17	5
GSM512557	8	2	0	13	1
GSM512558	8	0	0	16	0
GSM512559	8	5	0	11	0
GSM512560	7	0	0	16	1
GSM512561	16	0	0	8	0
GSM512562	10	0	0	13	1
GSM512563	15	0	0	9	0
GSM512564	12	0	0	11	1
GSM512565	14	0	0	10	0
GSM512566	6	0	0	18	0
GSM512567	9	0	0	15	0
GSM512568	14	0	0	10	0
GSM512569	15	0	0	9	0
GSM512570	7	0	0	16	1
GSM512571	21	0	0	3	0
GSM512572	9	0	0	14	1
GSM512573	11	0	0	13	0
GSM512574	6	0	0	18	0
GSM512575	10	1	0	13	0
GSM512576	16	0	0	8	0
GSM512577	7	0	0	17	0
GSM512578	6	0	0	18	0
GSM512579	13	0	0	11	0
GSM512580	13	0	0	11	0
GSM65316	3	21	0	0	0
GSM65317	0	24	0	0	0
GSM65318	24	0	0	0	0
GSM65319	24	0	0	0	0
GSM65320	24	0	0	0	0
GSM65321	1	23	0	0	0
GSM65322	0	24	0	0	0
GSM65323	24	0	0	0	0
GSM65324	0	24	0	0	0
GSM65325	2	17	5	0	0
GSM65326	15	8	1	0	0
GSM65327	4	20	0	0	0
GSM65328	0	24	0	0	0
GSM65329	24	0	0	0	0
GSM65330	9	15	0	0	0
GSM65331	24	0	0	0	0
GSM65332	24	0	0	0	0
GSM65333	3	4	17	0	0
GSM65334	22	2	0	0	0
GSM65335	2	22	0	0	0
GSM65336	21	3	0	0	0
GSM65337	0	24	0	0	0
GSM65338	15	9	0	0	0
GSM65339	1	0	0	0	23
GSM65340	20	4	0	0	0
GSM65341	3	21	0	0	0
GSM65342	22	2	0	0	0
GSM65343	15	3	0	6	0
GSM65344	0	24	0	0	0
GSM65345	7	17	0	0	0
GSM65346	21	0	0	3	0
GSM65347	17	6	1	0	0
GSM65348	12	12	0	0	0
GSM65349	24	0	0	0	0
GSM65350	2	14	6	0	2
GSM65351	14	10	0	0	0
GSM65352	0	24	0	0	0
GSM65353	5	19	0	0	0
GSM65354	2	22	0	0	0
GSM65355	9	0	0	15	0
GSM65356	9	13	0	2	0
GSM65357	16	8	0	0	0
GSM65358	11	13	0	0	0
GSM65359	4	20	0	0	0
GSM65360	7	17	0	0	0
GSM65361	22	2	0	0	0
GSM65362	17	3	0	4	0
GSM65363	22	2	0	0	0
GSM65364	11	13	0	0	0
GSM65365	21	3	0	0	0
GSM65366	4	20	0	0	0
GSM65367	7	7	0	9	1
GSM65368	22	2	0	0	0
GSM65369	0	24	0	0	0
GSM65370	0	24	0	0	0
GSM65371	0	24	0	0	0
GSM65372	0	24	0	0	0
GSM65373	3	21	0	0	0
GSM65374	0	24	0	0	0
GSM65375	4	20	0	0	0
GSM65376	19	5	0	0	0
GSM65377	0	24	0	0	0
GSM65378	11	12	0	1	0
GSM65379	24	0	0	0	0
GSM65752	0	0	0	0	24
GSM65753	21	3	0	0	0
GSM65754	23	1	0	0	0
GSM65755	6	18	0	0	0
GSM65756	1	23	0	0	0
GSM65757	1	23	0	0	0
GSM65758	22	2	0	0	0
GSM65760	2	22	0	0	0
GSM65761	0	24	0	0	0
GSM65762	24	0	0	0	0
GSM65763	22	2	0	0	0
GSM65764	24	0	0	0	0
GSM65765	9	15	0	0	0
GSM65766	19	0	0	5	0
GSM65767	22	2	0	0	0
GSM65768	0	7	15	0	2
GSM65769	21	3	0	0	0
GSM65770	24	0	0	0	0
GSM65771	22	2	0	0	0
GSM65772	3	4	13	3	1
GSM65773	22	1	0	1	0
GSM65774	2	22	0	0	0
GSM65775	22	2	0	0	0
GSM65776	21	3	0	0	0
GSM65779	21	0	0	3	0
GSM65780	24	0	0	0	0
GSM65781	24	0	0	0	0
GSM65782	22	2	0	0	0
GSM65783	24	0	0	0	0
GSM65784	19	5	0	0	0
GSM65785	24	0	0	0	0
GSM65786	4	20	0	0	0
GSM65787	24	0	0	0	0
GSM65788	24	0	0	0	0
GSM65789	23	1	0	0	0
GSM65790	22	2	0	0	0
GSM65791	24	0	0	0	0
GSM65792	0	1	0	0	23
GSM65793	24	0	0	0	0
GSM65794	3	3	15	1	2
GSM65795	0	0	0	0	24
GSM65796	24	0	0	0	0
GSM65797	24	0	0	0	0
GSM65798	22	2	0	0	0
GSM65799	24	0	0	0	0
GSM65800	23	1	0	0	0
GSM65801	23	1	0	0	0
GSM65802	0	1	1	0	22
GSM65803	24	0	0	0	0
GSM65804	6	2	0	10	6
GSM65805	0	0	0	0	24
GSM65806	0	1	0	0	23
GSM65807	24	0	0	0	0
GSM65808	23	1	0	0	0
GSM65810	18	6	0	0	0
GSM65811	23	1	0	0	0
GSM65812	24	0	0	0	0
GSM65813	0	24	0	0	0
GSM65814	24	0	0	0	0
GSM65815	21	3	0	0	0
GSM65816	0	0	2	0	22
GSM65817	23	1	0	0	0
GSM65818	5	19	0	0	0
GSM65819	0	20	4	0	0
GSM65820	24	0	0	0	0
GSM65821	9	15	0	0	0
GSM65822	9	15	0	0	0
GSM65823	22	2	0	0	0
GSM65824	14	2	0	8	0
GSM65825	0	4	20	0	0
GSM65826	21	3	0	0	0
GSM65827	20	4	0	0	0
GSM65828	1	23	0	0	0
GSM65829	12	12	0	0	0
GSM65830	21	3	0	0	0
GSM65831	0	24	0	0	0
GSM65832	22	2	0	0	0
GSM65833	11	13	0	0	0
GSM65834	14	10	0	0	0
GSM65835	3	0	15	5	1
GSM65836	24	0	0	0	0
GSM65837	4	20	0	0	0
GSM65838	0	6	18	0	0
GSM65839	0	2	22	0	0
GSM65840	23	1	0	0	0
GSM65841	0	0	0	0	24
GSM65842	0	1	1	0	22
GSM65843	0	1	18	0	5
GSM65844	0	24	0	0	0
GSM65845	0	1	1	0	22
GSM65846	0	24	0	0	0
GSM65847	22	2	0	0	0
GSM65848	23	1	0	0	0
GSM65849	23	1	0	0	0
GSM65850	0	0	0	0	24
GSM65851	0	24	0	0	0
GSM65852	0	0	0	0	24
GSM65853	22	2	0	0	0
GSM65854	22	2	0	0	0
GSM65855	13	7	0	3	1
GSM65856	1	23	0	0	0
GSM65857	0	24	0	0	0
GSM65858	24	0	0	0	0
GSM65859	21	3	0	0	0
GSM65860	20	4	0	0	0
GSM65861	1	0	13	4	6
GSM65862	24	0	0	0	0
GSM65863	0	0	0	0	24
GSM65864	23	1	0	0	0
GSM65865	2	0	0	21	1
GSM65866	0	5	18	0	1
GSM65867	21	3	0	0	0
GSM65868	0	24	0	0	0
GSM65869	8	16	0	0	0
GSM65870	3	16	4	0	1
GSM65871	23	1	0	0	0
GSM65872	19	5	0	0	0
GSM65873	7	17	0	0	0
GSM65874	10	0	0	14	0
GSM65875	23	1	0	0	0
GSM65876	1	6	7	7	3
GSM65877	21	3	0	0	0
GSM65878	1	0	0	4	19
GSM65879	2	0	1	10	11
GSM65880	22	2	0	0	0
