# Supplementary material for: The Discovery of Novel Biomarkers Improves Breast Cancer Intrinsic Subtype Prediction and Reconciles the Labels in the METABRIC Data Set
Source: PLoS One. 2015 Jul 1;10(7):e0129711. doi: 10.1371/journal.pone.0129711 (PMC4488510; doi:10.1371/journal.pone.0129711)
Supplement: S3 Table — Table describing the performance of each classifier on the METABRIC discovery and validation sets, and ROCK test set using the PAM50 list. It shows the percentage of correctly, incorrectly and not classified samples, Fleiss Kappa index, Cramer’s V, Average Sensitivity, and other values for classification. The 24 classifiers from the Weka software suite are also listed. The labels predicted by each classifier for all samples using CM1 list are defined as: 1—luminal A, 2—luminal B, 3—HER2-enriched, 4—normal-like, 5—basal-like. Count of predicted labels was obtained with the consensus of the majority of classifiers. (XLSX) [file pone.0129711.s005.xlsx]

## Sheet: Legends
Tab	Content
Perf METABRIC Discovery PAM50	Performance of each classifier on the discovery and validation datasets, for the PAM50 list. Columns are: pctCorrect, pctIncorrect, pctUnclassified: Percentage of correctly, incorrectly and not classified samples, respectively. kappa: Fleiss Kappa index. meanAbsoluteError, rootMeanSquaredError, relativeAbsoluteError, rootRelativeSquaredError: values for the classification. cramerV: Cramer's V ave…
Perf METABRIC Validation PAM50
Perf ROCK PAM50
Pred METABRIC Discovery PAM50	Label predicted by each classifier for all samples in discovery and validation datasets, for PAM50 list. 1: luminal A, 2: luminal B, 3: HER2-enriched, 4: normal-like, 5: basal-like.
Pred METABRIC Validation PAM50
Pred ROCK PAM50
Label METABRIC Discovery PAM50	Count of predicted labels used to obtain the majority of classifiers predicted label, for the discovery and validation dataset, for the PAM50 list. There are 24 classifiers in the Weka suite.
Label METABRIC Validation PAM50
Label ROCK PAM50

## Sheet: Perf METABRIC Discovery PAM50
classifier	type	pctCorrect	pctIncorrect	pctUnclassified	kappa	meanAbsoluteError	rootMeanSquaredError	relativeAbsoluteError	rootRelativeSquaredError	cramerV	averageSensitivity
BayesNet	bayes	84.0522	15.9478	0	0.771506	0.0646226	0.239706	23.5876	64.7951	0.77578	0.846974
NaiveBayes	bayes	84.654	15.346	0	0.780918	0.0604989	0.233719	22.0824	63.1767	0.785223	0.849097
NaiveBayesUpdateable	bayes	84.8546	15.1454	0	0.783721	0.060702	0.23419	22.1565	63.304	0.788108	0.852306
Logistic	functions	84.8546	15.1454	0	0.779242	0.0613225	0.243403	22.383	65.7944	0.737353	0.787189
MultilayerPerceptron	functions	90.2708	9.72919	0	0.857309	0.0427099	0.179821	15.5893	48.6074	0.853173	0.863722
SimpleLogistic	functions	91.0732	8.92678	0	0.868826	0.0522389	0.163462	19.0675	44.1856	0.851113	0.863524
SMO	functions	90.9729	9.02708	0	0.86723	0.244052	0.322385	89.0802	87.144	0.845808	0.866105
IBk	lazy	82.9488	17.0512	0	0.748455	0.0695999	0.260445	25.4043	70.401	0.733382	0.755285
KStar	lazy	79.9398	20.0602	0	0.693725	0.081028	0.275198	29.5756	74.3891	0.679184	0.676585
AttributeSelectedClassifier	meta	80.2407	19.7593	0	0.709768	0.0817569	0.273141	29.8416	73.8327	0.696855	0.744524
Bagging	meta	85.1555	14.8445	0	0.779315	0.096145	0.206519	35.0934	55.8242	0.747019	0.767622
ClassificationViaRegression	meta	86.2588	13.7412	0	0.794751	0.0898861	0.206888	32.8089	55.9242	0.786018	0.777408
LogitBoost	meta	85.5567	14.4433	0	0.786169	0.0772512	0.201698	28.1971	54.5211	0.775358	0.801984
MultiClassClassifier	meta	85.4564	14.5436	0	0.783702	0.291111	0.364736	106.257	98.5917	0.744674	0.766025
RandomCommittee	meta	86.8606	13.1394	0	0.803355	0.0884253	0.196703	32.2756	53.1708	0.782984	0.758814
DecisionTable	rules	74.0221	25.9779	0	0.609519	0.161389	0.268477	58.9079	72.5723	0.605025	0.606409
JRip	rules	79.9398	20.0602	0	0.704663	0.0976974	0.267822	35.66	72.395	0.680024	0.73767
PART	rules	80.7422	19.2578	0	0.717761	0.0789677	0.273104	28.8236	73.8227	0.702072	0.762879
HoeffdingTree	trees	84.3531	15.6469	0	0.776429	0.0604959	0.232606	22.0813	62.8758	0.781095	0.852004
J48	trees	82.7482	17.2518	0	0.747407	0.0707048	0.253231	25.8076	68.4509	0.734968	0.764622
LMT	trees	90.4714	9.52859	0	0.860243	0.0540022	0.169122	19.711	45.7154	0.837491	0.867291
RandomForest	trees	86.2588	13.7412	0	0.79317	0.0962487	0.20351	35.1313	55.0109	0.768873	0.782373
RandomTree	trees	77.9338	22.0662	0	0.67765	0.0882648	0.297094	32.217	80.3074	0.658787	0.65363
REPTree	trees	80.1404	19.8596	0	0.706562	0.101507	0.253683	37.0506	68.5731	0.687536	0.730598

## Sheet: Perf METABRIC Validation PAM50
classifier	type	pctCorrect	pctIncorrect	pctUnclassified	kappa	meanAbsoluteError	rootMeanSquaredError	relativeAbsoluteError	rootRelativeSquaredError	cramerV	average sensitivity
BayesNet	bayes	73.2053	26.7947	0	0.657836	0.1068	0.314117	33.7652	78.9893	0.686642	0.707291
NaiveBayes	bayes	73.2053	26.7947	0	0.657928	0.106944	0.319567	33.8107	80.3599	0.687477	0.706635
NaiveBayesUpdateable	bayes	73.2053	26.7947	0	0.657928	0.106944	0.319567	33.8107	80.3599	0.687477	0.706635
Logistic	functions	72.8008	27.1992	0	0.650097	0.109708	0.327178	34.6846	82.2737	0.674416	0.686862
MultilayerPerceptron	functions	74.2164	25.7836	0	0.66834	0.105926	0.309211	33.4889	77.7557	0.699869	0.704107
SimpleLogistic	functions	73.2053	26.7947	0	0.655148	0.109406	0.294928	34.5892	74.1639	0.688389	0.692068
SMO	functions	72.5986	27.4014	0	0.647344	0.25549	0.339559	80.7744	85.3872	0.683582	0.687713
IBk	lazy	70.1719	29.8281	0	0.614945	0.120314	0.344559	38.0378	86.6446	0.656665	0.647706
KStar	lazy	63.1951	36.8049	0	0.52177	0.147446	0.376586	46.6157	94.6982	0.581356	0.576602
AttributeSelectedClassifier	meta	68.5541	31.4459	0	0.596139	0.127431	0.342551	40.288	86.1394	0.623489	0.648759
Bagging	meta	67.4419	32.5581	0	0.578892	0.148118	0.308101	46.8281	77.4765	0.626374	0.626993
ClassificationViaRegression	meta	68.453	31.547	0	0.59221	0.135429	0.296014	42.8164	74.4371	0.635022	0.636802
LogitBoost	meta	69.6663	30.3337	0	0.608905	0.129654	0.300545	40.9906	75.5765	0.645589	0.652878
MultiClassClassifier	meta	67.1385	32.8615	0	0.574561	0.29669	0.372328	93.8	93.6274	0.611181	0.620451
RandomCommittee	meta	67.1385	32.8615	0	0.574812	0.142568	0.297974	45.0736	74.9301	0.624409	0.623469
DecisionTable	rules	57.5329	42.4671	0	0.446499	0.205475	0.337759	64.9619	84.9346	0.551518	0.52247
JRip	rules	69.363	30.637	0	0.605393	0.144241	0.331817	45.6024	83.4404	0.637305	0.652127
PART	rules	67.7452	32.2548	0	0.584063	0.130012	0.354817	41.104	89.224	0.618713	0.633345
HoeffdingTree	trees	73.2053	26.7947	0	0.657928	0.106956	0.319601	33.8145	80.3684	0.687477	0.706635
J48	trees	66.633	33.367	0	0.570942	0.136676	0.358956	43.2108	90.2648	0.611056	0.631347
LMT	trees	73.2053	26.7947	0	0.655148	0.109406	0.294928	34.5892	74.1639	0.688389	0.692068
RandomForest	trees	66.7341	33.2659	0	0.569138	0.147543	0.302761	46.6464	76.1338	0.623654	0.619098
RandomTree	trees	64.8129	35.1871	0	0.546769	0.140748	0.375164	44.4982	94.3407	0.583985	0.609582
REPTree	trees	66.4307	33.5693	0	0.566427	0.145301	0.331414	45.9376	83.339	0.606158	0.616495

## Sheet: Perf ROCK PAM50
classifier	type	pctCorrect	pctIncorrect	pctUnclassified	kappa	meanAbsoluteError	rootMeanSquaredError	relativeAbsoluteError	rootRelativeSquaredError	cramerV	average sensitivity
BayesNet	bayes	75.3503	24.6497	0	0.668817	0.101931	0.302963	35.5345	80.0123	0.664733	0.821694
NaiveBayes	bayes	68.9809	31.0191	0	0.591646	0.12516	0.345503	43.6323	91.2471	0.624065	0.786615
NaiveBayesUpdateable	bayes	68.9809	31.0191	0	0.591646	0.12516	0.345503	43.6323	91.2471	0.624065	0.786615
Logistic	functions	68.7261	31.2739	0	0.556702	0.124865	0.346982	43.5296	91.6377	0.565935	0.640453
MultilayerPerceptron	functions	74.2038	25.7962	0	0.640395	0.105926	0.30976	36.9271	81.8073	0.636933	0.744451
SimpleLogistic	functions	75.2866	24.7134	0	0.653954	0.105696	0.275979	36.847	72.8856	0.621923	0.684596
SMO	functions	74.9682	25.0318	0	0.655376	0.254344	0.337699	88.6677	89.186	0.643141	0.779551
IBk	lazy	72.2293	27.7707	0	0.61881	0.112125	0.332464	39.0884	87.8034	0.617521	0.767107
KStar	lazy	63.5669	36.4331	0	0.478408	0.146323	0.369995	51.0103	97.7152	0.504431	0.547468
AttributeSelectedClassifier	meta	69.2357	30.7643	0	0.575282	0.127644	0.343188	44.4982	90.6355	0.580747	0.699677
Bagging	meta	70	30	0	0.582277	0.161997	0.292801	56.4742	77.3284	0.588671	0.711369
ClassificationViaRegression	meta	65.6688	34.3312	0	0.512752	0.140961	0.330113	49.1409	87.1824	0.527141	0.574391
LogitBoost	meta	70.4459	29.5541	0	0.58614	0.13109	0.291026	45.6997	76.8598	0.578041	0.674787
MultiClassClassifier	meta	70.2548	29.7452	0	0.578788	0.299232	0.37516	104.316	99.0793	0.577064	0.672905
RandomCommittee	meta	69.2357	30.7643	0	0.56903	0.159592	0.28492	55.636	75.2472	0.589993	0.70684
DecisionTable	rules	48.535	51.465	0	0.352734	0.241152	0.366744	84.0689	96.8566	0.465353	0.606744
JRip	rules	62.4204	37.5796	0	0.486374	0.166231	0.345179	57.9502	91.1615	0.509412	0.622275
PART	rules	64.9682	35.0318	0	0.510786	0.141153	0.372526	49.2079	98.3838	0.516546	0.552078
HoeffdingTree	trees	69.0446	30.9554	0	0.592528	0.124761	0.345021	43.4935	91.1196	0.625449	0.787855
J48	trees	64.2038	35.7962	0	0.506663	0.146771	0.372266	51.1665	98.315	0.549497	0.682026
LMT	trees	75.2866	24.7134	0	0.653954	0.105696	0.275979	36.847	72.8856	0.621923	0.684596
RandomForest	trees	68.5987	31.4013	0	0.558789	0.159949	0.290394	55.7604	76.6927	0.583656	0.711718
RandomTree	trees	65.3503	34.6497	0	0.51087	0.138599	0.372288	48.3174	98.321	0.483115	0.55482
REPTree	trees	66.6879	33.3121	0	0.539773	0.15045	0.333887	52.4487	88.1792	0.566245	0.700993

## Sheet: Pred METABRIC Discovery PAM50
	Class	BayesNet	NaiveBayes	NaiveBayesUpdateable	Logistic	MultilayerPerceptron	SimpleLogistic	SMO	IBk	KStar	AttributeSelectedClassifier	Bagging	ClassificationViaRegression	LogitBoost	MultiClassClassifier	RandomCommittee	DecisionTable	JRip	PART	HoeffdingTree	J48	LMT	RandomForest	RandomTree	REPTree
MB-0362	1	2	2	2	1	1	1	1	1	1	1	1	1	1	1	1	1	1	1	2	2	1	1	1	1
MB-0346	3	3	3	3	3	3	3	3	3	2	3	3	3	3	3	3	3	3	3	3	3	3	3	4	3
MB-0386	1	1	1	1	1	1	1	1	2	2	2	1	1	1	1	1	2	2	1	1	2	1	1	1	2
MB-0574	1	1	1	1	1	2	1	1	2	1	2	1	1	1	1	1	1	2	2	1	1	1	1	1	2
MB-0185	2	2	2	2	2	2	2	2	2	2	3	2	2	2	2	2	2	2	2	2	2	2	2	2	2
MB-0503	1	1	1	1	1	1	1	1	1	1	1	1	1	1	1	1	1	1	1	1	1	1	1	1	1
MB-0641	4	4	4	4	4	4	4	4	4	1	1	4	4	4	1	1	1	4	4	4	4	4	1	4	1
MB-0201	3	3	3	3	5	3	5	3	3	3	3	5	3	3	4	3	3	3	3	3	3	3	3	5	5
MB-0218	2	2	2	2	2	2	2	2	2	2	2	2	2	2	2	2	2	2	2	2	2	2	2	2	2
MB-0316	5	5	5	5	5	5	5	5	5	5	5	5	5	5	5	5	5	5	5	5	5	5	5	5	5
MB-0189	4	4	4	1	1	1	4	4	4	1	4	1	4	4	1	4	1	4	2	4	4	4	4	4	1
MB-0891	1	1	1	1	1	1	1	1	1	1	1	1	1	1	1	1	1	1	1	1	1	1	1	1	1
MB-0658	5	5	5	5	5	5	5	5	5	5	5	5	5	5	5	5	5	5	5	5	5	5	5	5	5
MB-0899	1	1	1	1	1	1	1	1	1	1	1	1	1	1	1	1	1	1	1	1	1	1	1	1	1
MB-0605	1	1	1	1	1	1	1	1	1	1	1	1	1	1	1	1	1	1	1	1	1	1	1	1	1
MB-0258	1	1	1	1	1	1	1	1	1	1	1	1	1	1	1	1	1	1	1	1	1	1	1	1	1
MB-0506	3	3	3	3	3	3	3	3	3	2	4	3	3	3	3	3	3	4	4	3	1	3	3	3	3
MB-0420	5	5	5	5	5	5	5	5	5	5	5	5	5	5	5	5	5	5	5	5	5	5	5	5	5
MB-0223	1	1	1	1	1	1	1	1	1	1	1	1	1	1	1	1	1	1	1	1	1	1	1	1	1
MB-0445	1	1	1	1	1	1	1	1	1	1	1	1	1	1	1	1	1	1	1	1	1	1	1	1	1
MB-0199	1	1	1	1	1	1	1	1	1	1	1	1	1	1	1	1	1	1	1	1	1	1	1	1	1
MB-0517	1	1	1	1	1	1	1	1	1	1	1	1	1	1	1	1	1	1	1	1	1	1	1	1	1
MB-0155	4	4	4	4	1	4	4	4	4	1	1	1	1	4	1	1	1	4	1	4	4	4	1	1	4
MB-0428	1	1	1	1	1	1	1	1	2	1	1	1	1	1	1	1	1	1	1	1	1	1	1	1	2
MB-0117	1	1	1	1	1	1	1	1	1	1	1	1	1	1	1	1	1	1	1	1	1	1	1	1	1
MB-0906	4	4	4	4	3	4	4	4	3	1	4	5	4	3	5	4	3	4	4	4	5	5	4	3	3
MB-0249	INC	3	3	3	4	4	4	4	5	1	3	3	4	4	4	3	3	5	5	3	5	4	3	5	3
MB-0660	3	3	3	3	3	5	3	3	5	1	3	3	3	3	5	3	3	3	3	3	3	3	3	4	3
MB-0497	1	1	1	1	1	1	1	1	1	1	1	1	1	1	1	1	1	1	1	1	1	1	1	1	1
MB-0434	2	2	2	2	2	2	2	2	1	2	2	2	2	3	2	2	1	2	2	2	2	2	2	5	2
MB-0143	1	1	1	1	1	1	1	1	1	1	1	1	1	1	1	1	2	1	2	1	1	1	2	2	2
MB-0513	1	1	1	1	1	1	1	1	1	1	1	1	1	2	1	1	1	1	1	1	2	1	1	1	1
MB-0541	1	1	1	1	2	1	1	1	1	1	1	1	1	1	1	1	2	1	1	1	1	1	1	3	1
MB-0653	3	3	3	3	3	3	3	3	3	2	3	3	3	3	3	3	2	3	3	3	3	3	3	3	3
MB-0455	2	2	2	2	2	2	2	2	2	2	2	2	2	2	2	2	2	2	2	2	2	2	2	2	2
MB-0540	INC	4	4	4	5	5	5	5	5	1	4	5	5	4	4	4	1	1	3	4	4	5	4	1	3
MB-0384	1	2	1	2	1	1	1	1	1	1	1	1	1	1	1	1	2	1	1	2	1	1	2	1	1
MB-0637	2	2	2	2	2	2	2	2	2	2	2	2	2	2	2	2	2	2	2	2	2	2	2	5	2
MB-0157	5	5	5	5	5	5	5	5	5	5	5	5	5	5	5	5	2	5	5	5	5	5	5	5	5
MB-0443	1	1	1	1	1	1	1	1	2	1	2	1	2	2	1	1	1	2	2	1	2	1	1	2	1
MB-0584	2	2	2	2	2	2	2	2	2	1	2	2	2	2	2	2	2	2	2	2	2	2	2	1	2
MB-0292	3	3	3	3	3	3	3	3	3	3	3	3	3	2	3	3	5	3	3	3	3	3	3	5	3
MB-0322	1	1	1	1	1	1	1	1	1	1	1	1	1	1	1	1	1	1	1	1	1	1	1	1	1
MB-0501	1	1	1	1	1	1	1	1	1	1	1	1	1	1	1	1	1	1	1	1	1	1	1	1	1
MB-0401	5	5	5	5	5	5	5	5	5	5	5	5	5	5	5	5	5	5	5	5	5	5	5	5	5
MB-0140	1	1	1	1	2	1	1	1	1	2	1	1	1	1	2	1	1	1	1	1	1	1	1	1	1
MB-0606	2	1	1	1	2	2	2	2	2	1	2	2	2	2	2	2	2	2	2	1	1	2	1	1	2
MB-0666	2	2	2	2	2	2	2	2	1	1	2	2	2	1	2	2	2	1	2	2	2	2	2	1	2
MB-0598	2	2	2	2	3	2	1	1	2	2	1	2	4	2	1	2	2	2	1	2	3	1	2	1	1
MB-0453	3	3	3	3	2	3	3	3	5	3	5	3	3	3	2	3	3	3	5	3	5	3	3	3	5
MB-0138	1	1	1	1	1	1	1	1	1	1	1	1	1	1	1	1	1	1	1	1	1	1	1	1	1
MB-0579	1	1	2	2	2	1	2	1	1	1	1	2	2	1	1	1	1	1	1	2	2	2	2	1	1
MB-0405	2	2	2	2	2	2	2	2	2	2	2	2	2	2	2	2	2	2	2	2	2	2	2	2	2
MB-0471	1	1	2	2	1	1	1	1	2	1	1	1	1	1	1	1	1	1	1	2	1	1	1	2	2
MB-0347	3	3	3	3	2	3	3	3	3	3	2	3	5	3	2	3	2	3	2	3	2	3	3	2	5
MB-0619	1	1	1	1	1	4	1	4	4	1	1	1	1	1	4	1	1	1	1	1	4	4	1	1	1
MB-0171	4	4	4	4	4	4	4	4	4	1	4	4	1	4	4	4	1	4	4	4	4	4	4	4	4
MB-0310	1	1	1	1	1	1	1	1	1	1	1	1	1	1	1	1	1	1	1	1	1	1	1	1	1
MB-0621	INC	4	4	4	4	4	4	4	4	1	1	1	1	1	1	4	4	1	1	4	1	4	1	1	1
MB-0614	1	2	2	2	1	1	1	1	2	1	1	1	1	1	1	1	1	1	4	2	1	1	2	2	1
MB-0372	5	5	5	5	5	5	5	5	5	5	5	5	5	5	5	5	5	5	5	5	5	5	5	5	5
MB-0374	2	2	2	2	2	2	2	2	1	2	1	1	2	2	5	1	2	1	4	2	1	2	2	1	1
MB-0382	1	4	1	1	1	1	1	1	1	4	4	1	1	1	1	1	1	4	1	1	1	1	1	1	1
MB-0327	1	1	1	1	1	1	1	1	1	1	1	1	1	1	1	1	1	1	1	1	1	1	1	1	1
MB-0066	2	2	2	2	2	2	2	2	2	1	2	2	2	2	2	2	2	2	2	2	2	2	2	2	1
MB-0144	1	1	1	1	2	2	2	1	1	1	1	1	2	1	1	1	1	1	1	1	2	1	1	2	1
MB-0596	1	1	1	1	1	1	1	1	1	1	1	1	1	1	1	1	1	1	1	1	1	1	1	1	1
MB-0164	5	5	5	5	2	5	5	5	5	5	5	5	5	5	5	5	3	5	5	5	5	5	5	5	5
MB-0215	2	2	2	2	2	2	2	2	2	2	2	2	2	2	2	1	2	2	1	2	2	2	1	1	2
MB-0146	2	2	2	2	2	2	2	2	2	2	1	2	1	1	2	2	2	2	2	2	2	2	2	1	2
MB-0229	1	1	1	1	1	1	1	1	1	1	1	1	1	1	1	1	1	1	1	1	1	1	1	1	1
MB-0505	1	1	4	4	1	1	1	1	1	1	1	1	1	1	1	1	4	1	1	4	1	1	1	1	1
MB-0102	2	2	2	2	2	2	2	2	2	2	2	2	2	2	2	2	2	2	2	2	2	2	2	2	2
MB-0569	2	2	2	2	2	2	2	2	2	2	2	2	2	2	2	2	1	2	2	2	2	2	2	2	2
MB-0516	5	5	5	5	5	5	5	5	5	5	5	5	5	5	5	5	5	5	5	5	5	5	5	5	5
MB-0272	2	2	2	2	2	2	2	2	2	2	2	2	2	2	2	2	2	2	2	2	2	2	2	2	2
MB-0585	1	1	1	1	2	2	2	2	2	1	1	1	1	1	2	1	1	1	2	1	2	2	1	2	1
MB-0494	INC	3	3	3	3	3	5	5	3	5	3	3	5	5	5	5	5	5	3	3	5	5	3	5	3
MB-0306	1	1	1	1	1	1	1	1	1	1	4	1	1	1	1	1	1	1	1	1	1	1	1	1	1
MB-0463	1	1	1	1	1	1	1	1	1	1	1	1	1	1	1	1	1	1	1	1	1	1	1	1	1
MB-0198	2	2	2	2	2	2	2	2	2	2	2	2	2	2	2	2	3	2	2	2	2	2	2	2	2
MB-0203	1	1	1	1	1	2	1	1	2	2	1	1	1	1	1	1	1	1	1	1	1	1	2	1	1
MB-0607	1	1	1	1	1	1	1	1	1	1	2	1	1	1	1	1	4	1	1	1	1	1	1	1	1
MB-0631	1	1	1	1	1	1	1	1	1	1	1	1	1	1	1	1	1	1	1	1	2	1	1	1	1
MB-0363	2	2	2	2	2	2	2	2	2	2	2	2	2	2	2	2	2	2	2	2	2	2	2	2	2
MB-0427	2	2	1	1	1	1	2	2	1	1	2	1	2	2	2	2	2	2	2	1	2	2	2	2	2
MB-0519	4	4	4	4	4	4	4	4	4	1	1	1	1	4	4	1	1	1	4	4	4	4	1	1	4
MB-0371	2	2	2	2	2	2	2	2	2	2	1	2	2	1	2	2	1	2	2	2	2	2	2	1	2
MB-0380	2	2	2	2	2	2	2	2	2	2	2	2	2	2	2	2	2	2	2	2	2	2	2	2	2
MB-0221	3	3	3	3	3	3	3	3	3	3	3	3	3	3	3	3	3	3	3	3	3	3	3	5	3
MB-0348	1	1	1	1	1	1	1	1	1	1	1	1	1	1	1	1	1	1	1	1	1	1	1	1	1
MB-0261	1	1	2	2	1	1	1	1	1	1	2	1	1	2	1	1	1	1	1	2	1	1	1	1	1
MB-0576	2	2	2	2	2	2	2	2	2	2	1	2	2	2	2	2	1	2	2	2	2	2	2	1	2
MB-0385	INC	2	2	2	1	1	2	2	1	1	2	1	2	2	2	1	1	2	1	2	1	2	1	3	1
MB-0659	4	4	4	4	5	4	4	4	5	1	4	5	4	5	4	4	1	1	4	4	4	4	4	4	4
MB-0270	2	2	2	2	2	2	2	2	2	2	2	2	2	2	2	2	2	2	2	2	2	2	2	2	2
MB-0379	1	1	1	1	1	1	1	1	1	1	1	1	1	1	1	1	1	1	1	1	1	1	1	1	1
MB-0432	INC	4	4	4	5	5	5	5	5	5	1	4	4	5	4	4	3	5	3	4	4	4	4	5	4
MB-0527	1	1	1	1	1	1	1	1	1	1	1	1	1	1	1	1	1	1	1	1	1	1	1	1	1
MB-0624	1	1	4	4	1	1	1	1	1	4	4	1	1	1	1	1	1	4	1	4	4	1	1	1	1
MB-0273	1	1	1	1	1	1	1	1	1	1	1	1	1	1	1	1	1	1	1	1	1	1	1	1	1
MB-0050	4	4	4	4	4	4	1	1	1	1	4	1	1	4	1	1	1	1	4	4	4	4	4	4	1
MB-0460	1	1	4	4	4	4	1	1	1	1	1	1	1	4	1	4	1	4	4	4	1	4	1	1	1
MB-0654	1	1	1	1	1	1	1	1	1	1	1	1	1	1	1	1	1	1	1	1	1	1	1	1	1
MB-0454	1	1	1	1	1	1	1	1	1	1	1	1	1	2	1	1	1	1	1	1	1	1	1	1	1
MB-0392	4	4	4	4	4	4	4	4	1	4	1	1	4	4	1	1	3	1	4	4	4	4	1	4	1
MB-0336	2	2	2	2	2	2	2	2	2	2	2	2	2	2	2	2	2	2	2	2	2	2	2	2	2
MB-0467	3	3	3	3	3	3	3	3	3	2	3	3	3	3	3	3	3	3	3	3	3	3	3	3	3
MB-0349	2	2	2	2	2	1	2	2	1	1	2	2	1	2	1	1	2	2	1	2	1	2	2	1	1
MB-0378	3	3	3	3	3	3	3	3	3	3	3	3	3	3	3	3	3	3	3	3	3	3	3	2	3
MB-0176	1	1	4	4	1	1	1	1	1	1	1	1	1	1	4	1	1	1	1	4	1	1	1	1	4
MB-0429	1	1	1	1	2	1	2	2	1	1	2	1	1	2	2	1	2	2	1	1	1	2	1	1	2
MB-0397	1	1	1	1	1	1	1	1	1	1	1	1	1	1	1	1	1	4	1	1	1	1	1	1	1
MB-0571	2	2	1	2	2	2	1	1	1	2	2	1	1	2	1	2	1	2	2	2	2	1	2	2	2
MB-0426	1	4	4	4	1	1	1	1	1	1	4	4	1	1	1	1	4	1	1	4	4	1	1	4	1
MB-0135	2	2	2	2	2	2	2	2	2	2	2	2	2	2	2	2	2	2	2	2	2	2	2	2	2
MB-0112	1	1	1	1	1	1	1	1	1	1	1	1	1	1	1	1	1	1	1	1	1	1	1	1	1
MB-0352	3	4	3	3	3	3	3	3	4	3	4	3	3	3	3	3	1	3	4	3	4	3	1	3	4
MB-0644	1	1	1	1	1	1	1	1	1	1	1	1	1	1	1	1	1	4	4	1	4	1	1	1	1
MB-0601	2	2	2	2	2	2	2	2	2	2	2	2	2	2	2	2	2	2	2	2	2	2	2	2	2
MB-0568	1	1	1	1	1	1	1	1	1	1	1	1	1	1	1	1	1	1	1	1	1	1	1	1	1
MB-0328	2	2	2	2	2	2	2	2	2	2	2	2	2	2	2	2	2	2	2	2	2	2	2	2	2
MB-0325	2	2	2	2	2	2	2	2	2	2	2	2	2	2	2	2	2	2	2	2	2	2	2	2	2
MB-0358	1	2	1	1	1	1	1	1	1	1	3	1	1	1	1	1	1	3	2	1	4	1	2	3	4
MB-0413	1	1	1	1	1	1	1	1	1	1	1	1	1	1	1	1	1	1	1	1	1	1	1	1	1
MB-0158	3	3	3	3	3	5	5	3	3	1	5	3	5	3	5	3	5	1	3	3	3	5	3	3	1
MB-0636	1	1	2	2	1	2	1	1	1	1	2	1	1	1	1	1	3	1	1	2	4	1	1	4	4
MB-0145	1	1	4	4	1	1	1	1	1	1	1	1	1	1	1	1	1	1	4	4	1	1	1	1	1
MB-0195	2	2	2	2	2	2	2	2	2	2	2	2	2	2	2	2	2	2	2	2	2	2	2	2	2
MB-0422	1	1	1	1	1	1	1	1	1	1	1	1	1	1	1	1	1	1	1	1	1	1	1	1	1
MB-0483	2	2	2	2	2	2	2	2	2	1	2	2	2	1	2	2	1	1	2	2	2	2	2	1	1
MB-0317	1	1	1	1	1	1	1	1	1	1	1	1	1	1	1	1	1	1	1	1	1	1	1	1	1
MB-0486	1	1	1	1	1	1	1	1	1	1	4	1	1	1	1	1	1	1	1	1	1	1	1	2	1
MB-0139	1	4	4	4	4	1	1	1	1	1	1	1	1	1	1	1	1	1	1	4	4	4	1	1	1
MB-0257	1	1	1	1	1	1	1	1	1	1	1	1	1	1	1	1	1	1	2	1	1	1	1	1	1
MB-0345	1	1	1	1	1	1	1	1	1	1	1	1	1	1	1	1	1	1	1	1	1	1	1	1	1
MB-0375	INC	4	4	4	4	4	4	4	5	5	3	1	5	5	5	1	1	2	4	4	4	4	5	1	4
MB-0419	1	1	1	1	1	1	1	1	1	1	1	1	1	1	1	1	1	1	1	1	1	1	1	1	1
MB-0480	1	1	1	1	1	1	1	1	1	1	1	1	1	1	1	1	1	1	1	1	1	1	1	1	1
MB-0311	2	2	2	2	2	2	2	2	2	2	2	2	2	2	2	2	3	2	3	2	2	2	2	2	2
MB-0324	2	2	2	2	2	2	2	2	2	1	2	2	2	2	2	2	2	1	2	2	2	2	1	1	2
MB-0368	2	2	2	2	2	2	2	2	2	2	2	2	2	2	2	2	2	2	2	2	2	2	2	2	2
MB-0389	2	2	2	2	2	2	2	2	2	2	2	2	2	2	2	2	2	2	2	2	2	2	2	2	2
MB-0248	1	1	1	1	1	1	1	1	1	1	1	1	1	1	1	1	1	2	1	1	2	1	1	1	2
MB-0035	3	1	2	2	3	3	3	3	2	1	3	3	1	1	3	3	3	2	3	2	3	3	2	2	3
MB-0667	2	2	2	2	2	2	2	2	2	2	2	2	2	2	2	2	2	2	2	2	2	2	2	2	2
MB-0423	1	1	1	1	1	1	1	1	1	1	1	1	1	1	1	1	1	1	1	1	1	1	1	1	1
MB-0904	1	1	1	1	1	1	1	1	1	1	1	1	1	1	1	1	1	1	1	1	1	1	1	1	1
MB-0119	2	2	2	2	2	2	2	2	2	2	2	2	2	2	2	2	2	2	1	2	2	2	2	2	1
MB-0650	1	1	1	1	1	1	1	1	2	1	1	1	1	1	1	1	1	1	1	1	1	1	1	1	1
MB-0204	1	1	1	1	1	1	1	1	1	1	1	1	1	1	1	1	1	1	1	1	1	1	1	1	1
MB-0184	1	1	1	1	1	2	1	1	1	2	2	1	1	1	1	1	1	1	1	1	1	1	1	1	1
MB-0600	2	2	2	2	2	2	1	2	2	2	2	1	1	1	2	1	1	2	3	2	1	2	2	2	2
MB-0400	5	5	5	5	5	5	5	5	5	5	5	5	5	5	5	5	1	5	5	5	5	5	5	5	5
MB-0511	1	1	1	1	1	1	1	1	1	1	1	1	1	1	1	1	1	1	1	1	1	1	1	1	1
MB-0059	1	1	1	1	2	2	2	1	1	1	1	1	2	2	1	1	1	1	1	1	2	2	1	2	2
MB-0500	5	5	5	5	5	5	5	5	5	5	5	5	5	5	5	5	5	5	5	5	5	5	5	5	5
MB-0150	5	5	5	5	5	5	5	5	5	5	5	5	5	5	5	5	5	5	5	5	5	5	5	5	5
MB-0895	2	2	2	2	2	2	2	2	2	1	2	2	1	2	2	2	1	2	1	2	4	2	1	2	2
MB-0366	1	1	1	1	1	1	1	1	1	1	1	1	1	1	1	1	1	1	1	1	1	1	1	1	1
MB-0173	2	2	2	2	2	2	2	2	2	2	2	2	2	2	2	2	1	2	2	2	1	2	2	1	2
MB-0131	1	1	1	1	1	1	1	1	1	1	1	1	1	1	1	1	1	1	1	1	1	1	1	1	2
MB-0206	5	5	5	5	5	5	5	5	5	5	5	5	5	5	5	5	1	5	5	5	5	5	5	5	5
MB-0315	1	1	1	1	1	1	1	1	1	1	1	1	1	1	1	1	1	1	1	1	1	1	1	1	1
MB-0361	3	3	3	3	3	3	3	3	3	2	3	3	3	3	3	3	2	3	3	3	3	3	3	1	3
MB-0545	4	2	4	4	4	4	4	4	4	4	4	1	4	4	4	1	3	1	4	4	1	4	4	1	1
MB-0370	2	2	2	2	2	2	2	2	2	2	2	2	2	2	2	2	2	2	2	2	2	2	1	2	2
MB-0642	1	1	1	1	1	1	1	1	1	1	1	1	1	1	1	1	1	1	1	1	1	1	1	1	1
MB-0431	1	1	1	1	1	1	1	1	1	1	1	1	1	1	1	1	1	1	1	1	1	1	1	1	1
MB-0181	1	1	1	1	1	1	1	1	1	1	1	1	1	1	1	1	1	1	1	1	1	1	1	1	1
MB-0603	1	1	1	1	1	1	1	1	1	1	1	1	1	1	1	1	1	1	1	1	1	1	1	1	1
MB-0295	1	1	1	1	1	1	1	1	1	1	1	1	1	1	1	1	1	1	1	1	1	1	1	1	1
MB-0618	1	1	1	1	1	2	1	1	1	2	2	1	1	1	1	1	1	1	1	1	1	1	1	1	2
MB-0496	4	4	4	4	4	4	4	4	4	4	1	1	1	1	4	1	1	1	4	4	4	4	4	1	4
MB-0411	1	1	1	1	4	1	1	1	1	1	1	1	1	1	1	1	1	1	1	1	1	1	1	4	1
MB-0285	4	4	4	4	4	4	4	4	4	1	1	1	1	4	4	1	1	4	4	4	1	4	4	1	1
MB-0360	2	2	2	2	2	2	2	2	2	2	2	2	2	2	2	2	2	2	2	2	2	2	2	2	2
MB-0359	1	1	1	1	1	1	1	1	1	1	1	1	1	1	1	1	1	1	1	1	1	1	1	1	1
MB-0344	INC	4	4	4	4	4	4	4	4	1	4	1	1	1	1	1	1	1	4	4	1	4	1	1	1
MB-0583	1	1	1	1	1	1	1	1	1	1	1	1	1	1	1	1	1	1	1	1	1	1	1	1	1
MB-0202	INC	2	2	2	5	1	1	1	2	1	4	1	2	4	5	1	1	1	1	2	2	1	1	4	2
MB-0485	1	1	1	1	1	1	4	1	4	1	1	1	1	1	1	1	1	1	1	1	4	1	1	1	2
MB-0609	1	1	1	1	1	1	1	1	1	1	1	1	1	1	1	1	1	1	1	1	1	1	1	1	1
MB-0538	1	1	1	1	4	1	1	1	1	1	1	1	1	1	4	1	1	1	1	1	1	1	1	1	1
MB-0197	2	2	2	2	2	2	2	2	2	2	2	2	2	2	2	2	1	1	2	2	3	2	2	2	2
MB-0410	1	1	1	1	4	1	1	1	1	1	1	1	1	1	4	1	1	1	1	1	1	1	1	1	1
MB-0528	1	1	1	1	1	1	1	1	1	1	1	1	1	4	1	1	1	1	1	1	1	1	1	3	1
MB-0165	1	2	3	3	4	4	4	1	2	1	1	1	1	1	4	1	1	1	1	3	1	4	2	1	1
MB-0152	3	3	3	3	3	3	3	3	3	3	3	3	3	3	3	3	3	3	3	3	3	3	3	3	3
MB-0546	1	1	1	1	1	1	1	1	1	1	1	1	1	1	1	1	1	1	4	1	4	1	1	1	1
MB-0148	3	3	3	3	3	3	3	3	3	3	3	3	3	3	3	3	3	3	3	3	3	3	3	3	3
MB-0594	2	1	1	1	2	2	2	2	1	2	2	1	2	2	2	2	1	2	2	1	2	2	1	2	1
MB-0521	1	4	4	4	1	1	1	1	4	1	1	1	1	1	1	1	1	1	4	4	1	1	1	1	1
MB-0532	2	2	3	3	2	2	3	2	2	2	2	2	2	2	3	2	3	2	3	3	3	2	2	5	2
MB-0536	2	2	2	2	2	2	2	2	2	2	2	2	2	2	2	2	2	3	2	2	2	2	2	2	1
MB-0319	2	2	2	2	2	2	2	2	2	2	2	2	2	2	2	2	2	1	2	2	2	2	2	2	2
MB-0491	1	1	1	1	1	1	1	1	1	1	4	1	1	1	1	1	2	1	4	1	1	1	1	1	1
MB-0404	1	2	2	2	2	2	1	1	2	1	2	1	1	1	1	1	1	1	1	2	1	2	1	2	2
MB-0243	1	2	2	2	1	1	1	1	2	2	1	2	1	1	1	1	1	2	1	2	2	2	1	1	2
MB-0580	1	2	1	1	1	1	1	1	1	1	1	1	1	1	1	1	1	1	1	1	1	1	1	1	4
MB-0312	2	2	2	2	2	2	2	2	2	2	2	2	2	2	2	2	2	2	2	2	2	2	2	2	2
MB-0060	2	3	2	2	5	2	2	2	2	2	3	3	3	2	2	2	2	2	2	2	5	2	2	2	3
MB-0635	INC	4	4	4	4	5	4	4	5	4	5	5	4	3	4	4	1	5	3	4	3	5	4	5	5
MB-0649	1	1	1	1	1	1	1	1	1	1	1	1	1	1	1	1	1	1	1	1	1	1	1	4	1
MB-0643	3	3	3	3	3	3	3	3	3	3	3	3	3	3	5	3	3	3	3	3	3	3	3	3	3
MB-0581	3	3	3	3	5	3	4	5	5	5	3	3	3	3	3	3	3	3	3	3	3	5	3	4	5
MB-0383	2	2	2	2	2	2	2	2	2	2	2	1	2	2	2	2	2	2	2	2	2	2	2	1	2
MB-0142	1	1	1	1	1	1	1	1	1	1	1	1	1	1	1	1	1	1	1	1	1	1	1	1	1
MB-0320	1	1	1	1	4	1	1	1	1	1	4	1	1	1	1	1	1	1	1	1	1	1	1	4	1
MB-0207	1	1	1	1	1	1	1	1	1	1	4	1	1	1	1	1	1	1	1	1	1	1	1	1	1
MB-0167	2	2	2	2	2	2	2	2	2	2	2	2	2	2	2	2	2	2	2	2	2	2	2	2	2
MB-0591	2	2	2	2	2	2	2	2	2	2	1	2	2	2	2	2	2	2	2	2	1	2	1	1	2
MB-0613	INC	3	3	3	5	5	5	5	5	3	5	5	3	3	1	3	3	3	5	3	5	5	3	3	5
MB-0313	2	2	2	2	2	2	2	2	2	2	2	2	2	2	2	2	2	2	2	2	2	2	2	2	2
MB-0599	1	4	4	4	1	1	1	1	1	1	1	1	1	1	1	1	1	1	1	4	1	1	1	1	4
MB-0286	1	1	4	4	1	1	1	1	1	1	1	1	1	4	1	1	1	1	1	4	1	1	1	1	1
MB-0575	1	1	1	1	1	1	1	1	1	1	1	1	1	1	1	1	1	1	4	1	1	1	1	1	1
MB-0549	2	2	2	2	2	1	2	2	2	2	1	2	2	2	2	2	2	2	2	2	2	2	2	2	2
MB-0214	5	5	5	5	5	5	5	5	5	5	5	5	5	5	5	5	5	5	5	5	5	5	5	5	5
MB-0589	2	2	2	2	2	2	2	2	2	1	2	1	1	1	2	1	2	2	2	2	2	2	1	1	1
MB-0406	2	2	2	2	2	2	2	2	2	2	2	2	2	2	2	2	2	2	2	2	1	2	2	2	2
MB-0452	2	2	2	2	2	2	2	2	2	2	2	2	2	2	2	2	2	2	2	2	2	2	2	1	2
MB-0524	4	4	4	4	4	4	4	4	4	1	4	4	4	4	4	1	1	4	4	4	4	4	1	1	5
MB-0880	1	1	1	1	1	1	1	1	1	1	1	1	1	1	1	1	1	1	1	1	1	1	1	1	1
MB-0573	1	1	1	1	1	1	1	1	1	1	1	1	1	1	1	1	1	1	1	1	1	1	1	1	1
MB-0664	5	5	5	5	4	5	5	5	5	5	5	5	5	5	5	5	5	5	5	5	5	5	5	5	5
MB-0446	5	5	5	5	5	5	5	5	5	5	5	5	5	5	5	5	5	5	5	5	5	5	5	5	5
MB-0008	2	2	2	2	2	2	2	2	2	2	2	2	2	2	2	2	2	2	2	2	2	2	2	2	2
MB-0656	5	5	3	3	5	5	5	5	5	5	5	5	5	5	5	5	3	5	5	3	5	5	5	5	5
MB-0154	1	1	4	4	1	1	1	1	4	1	1	1	1	1	1	1	1	1	1	4	1	1	1	1	1
MB-0597	4	4	4	4	4	4	4	4	4	1	4	4	4	4	4	1	1	1	4	4	4	4	1	4	4
MB-0550	2	2	2	2	2	2	2	2	2	2	2	2	2	2	2	2	2	2	2	2	2	2	2	3	2
MB-0616	2	2	2	2	2	2	2	2	2	2	1	2	2	2	2	2	2	2	1	2	2	2	2	1	2
MB-0448	1	1	1	1	1	1	1	1	2	2	1	1	1	1	1	1	1	2	1	1	1	1	1	2	1
MB-0412	2	2	2	2	2	2	2	2	2	2	2	2	2	2	2	2	2	2	2	2	2	2	2	2	2
MB-0122	1	1	1	1	1	1	1	1	1	1	1	1	1	1	1	1	1	1	1	1	1	1	1	1	1
MB-0425	1	1	1	1	1	1	1	1	1	1	1	1	1	1	1	1	1	1	1	1	1	1	1	1	1
MB-0314	3	3	3	3	3	3	3	3	3	2	1	3	3	3	3	3	3	3	1	3	1	3	3	3	3
MB-0356	1	1	1	1	1	1	1	1	1	1	1	1	1	1	1	1	2	1	1	1	2	1	1	1	1
MB-0440	2	2	2	2	2	2	2	2	2	2	2	2	2	2	2	2	2	2	2	2	2	2	2	2	2
MB-0398	2	2	2	2	2	2	2	2	1	1	2	2	2	2	2	1	2	2	2	2	2	2	2	2	2
MB-0438	3	3	3	3	3	3	3	3	3	3	3	3	3	3	3	1	2	3	3	3	3	3	3	2	3
MB-0449	1	1	1	1	1	1	1	1	1	1	1	1	1	1	1	1	1	1	1	1	1	1	1	1	1
MB-0162	1	1	1	1	1	1	1	1	1	1	1	1	1	1	1	1	1	1	1	1	1	1	1	1	1
MB-0593	3	3	4	4	5	5	3	3	4	1	3	3	3	3	1	5	5	1	3	4	3	3	3	3	3
MB-0301	1	1	1	1	2	2	1	1	1	1	1	1	1	1	2	1	1	2	1	1	1	1	1	1	1
MB-0628	1	4	4	4	1	1	1	1	1	1	1	1	1	1	1	1	1	1	1	4	1	1	1	1	1
MB-0283	2	2	2	2	2	2	2	2	2	2	2	2	2	2	2	2	2	2	2	2	2	2	2	2	2
MB-0106	1	1	1	1	1	1	1	1	1	1	1	1	1	1	1	1	1	1	1	1	1	1	1	1	1
MB-0341	1	1	1	1	1	1	1	1	1	2	1	1	1	1	5	1	1	1	4	1	1	1	1	1	1
MB-0474	2	2	2	2	2	2	2	2	2	2	2	2	2	2	2	2	2	2	2	2	2	2	2	2	2
MB-0394	1	1	1	1	1	1	1	1	1	1	1	1	1	1	1	1	1	1	1	1	1	1	1	1	1
MB-0373	2	2	2	2	2	2	2	2	2	2	2	2	1	2	5	2	2	2	1	2	2	2	2	3	2
MB-0247	1	1	1	1	1	1	1	1	1	1	1	1	1	1	1	1	1	1	1	1	1	1	1	1	1
MB-0225	2	2	2	2	2	2	2	2	2	2	2	2	2	2	2	1	2	2	1	2	2	2	2	2	2
MB-0424	4	4	4	4	4	4	4	4	4	4	4	4	4	4	5	4	1	4	4	4	4	4	4	4	4
MB-0209	4	4	4	4	1	4	4	4	5	4	4	4	4	5	4	4	1	1	4	4	4	4	4	4	4
MB-0115	5	5	5	5	5	5	5	5	5	5	5	5	5	5	5	5	5	5	5	5	5	5	5	5	5
MB-0136	1	1	1	1	1	1	1	1	1	1	1	1	1	1	1	1	1	1	1	1	1	1	1	1	1
MB-0542	1	2	1	1	1	4	4	4	1	1	1	1	4	4	4	1	1	1	4	1	1	4	1	1	1
MB-0354	5	3	3	3	5	5	5	5	3	2	3	5	3	5	5	5	1	5	5	3	5	5	5	3	3
MB-0151	1	1	1	1	1	1	1	1	1	1	2	1	1	2	1	1	1	2	1	1	2	1	1	1	1
MB-0590	2	2	2	2	2	2	2	2	2	2	2	2	2	2	2	2	2	2	2	2	2	2	2	2	2
MB-0608	5	5	5	5	5	5	5	5	5	5	5	5	5	5	5	5	1	5	5	5	5	5	5	5	5
MB-0657	4	4	4	4	4	4	4	4	4	1	4	1	4	4	4	4	1	4	4	4	4	4	4	4	4
MB-0559	1	1	1	1	1	1	1	1	1	1	1	1	1	1	1	1	2	1	1	1	2	1	1	1	1
MB-0893	INC	4	4	4	5	5	5	4	5	4	5	4	5	4	4	4	1	5	5	4	1	5	5	4	3
MB-0514	2	2	2	2	2	2	2	2	2	2	2	2	2	2	1	2	2	2	2	2	2	2	2	2	2
MB-0395	3	3	3	3	3	3	3	3	3	1	3	3	3	3	3	3	3	3	3	3	3	3	3	5	1
MB-0294	4	4	4	4	4	4	4	4	4	1	3	4	1	4	1	4	1	4	3	4	1	4	4	4	4
MB-0439	2	2	2	2	2	2	2	2	2	2	2	2	2	2	2	2	2	2	2	2	2	2	2	2	2
MB-0481	5	5	5	5	5	5	5	5	5	5	5	5	5	5	5	5	5	5	5	5	5	5	5	5	5
MB-0529	1	1	1	2	1	1	1	1	1	1	1	1	1	1	1	1	1	1	1	2	1	1	1	1	1
MB-0224	1	1	1	1	1	1	1	1	1	1	1	1	1	1	1	1	1	1	1	1	1	1	1	1	1
MB-0302	1	1	1	1	1	1	1	1	1	1	1	1	1	1	1	1	1	1	1	1	1	1	1	1	1
MB-0126	1	1	1	1	1	1	1	1	2	2	1	1	2	1	1	1	1	1	1	1	1	1	1	2	1
MB-0220	4	4	4	4	4	4	4	4	1	4	4	4	4	4	4	4	1	4	4	4	4	4	4	4	3
MB-0192	INC	1	1	4	4	4	4	4	4	1	1	1	4	4	4	1	1	1	1	4	1	4	1	2	4
MB-0121	1	1	1	1	1	1	1	1	1	1	1	1	1	1	1	1	1	1	1	1	1	1	1	1	1
MB-0239	1	1	1	1	3	1	1	1	1	1	1	1	1	1	1	1	1	1	1	1	1	1	1	1	1
MB-0364	1	1	1	1	1	1	1	1	1	1	1	1	1	1	1	1	1	1	1	1	1	1	1	1	1
MB-0232	1	1	1	1	1	1	1	1	1	1	1	1	1	1	1	1	2	1	1	1	1	1	1	2	1
MB-0884	2	2	2	2	2	2	2	2	2	2	2	2	2	2	2	2	2	2	2	2	2	2	2	2	2
MB-0238	5	5	5	5	5	5	5	5	5	5	5	5	5	5	4	5	5	5	5	5	5	5	5	5	5
MB-0194	1	1	4	4	1	1	1	1	1	1	1	1	1	1	1	1	1	5	1	4	1	1	1	1	1
MB-0882	2	2	2	2	2	2	2	2	2	2	2	2	2	2	2	2	2	2	2	2	2	2	2	2	2
MB-0010	2	2	2	2	2	2	2	2	2	2	2	2	2	2	2	2	2	3	2	2	2	2	2	2	2
MB-0236	1	1	2	2	1	1	1	1	1	2	1	1	1	1	1	1	1	2	1	2	1	1	1	1	1
MB-0377	INC	4	4	4	1	4	4	4	1	1	4	1	1	4	1	4	1	4	1	4	1	4	1	1	1
MB-0123	2	2	2	2	2	2	2	2	2	1	1	2	2	2	2	1	1	1	1	2	2	2	2	2	2
MB-0504	1	1	1	1	1	1	1	1	1	1	1	1	1	1	1	1	1	1	1	1	1	1	1	1	1
MB-0564	3	4	3	3	3	1	3	3	1	1	3	4	3	3	3	4	3	3	4	3	1	3	4	1	3
MB-0475	INC	1	2	2	5	1	1	1	1	1	4	3	2	1	1	3	2	1	4	2	3	1	1	3	3
MB-0321	1	1	1	1	1	1	1	1	1	1	1	1	1	1	1	1	1	1	2	1	1	1	1	1	1
MB-0482	INC	3	3	3	4	5	5	3	3	3	5	5	3	3	3	5	3	4	5	3	5	4	4	5	5
MB-0101	1	1	1	1	1	1	1	1	1	1	2	1	1	1	1	1	1	1	1	1	1	1	1	1	1
MB-0662	1	4	4	4	5	1	1	1	1	4	1	1	1	1	1	1	1	5	1	4	1	1	4	1	1
MB-0291	2	2	2	2	2	2	2	2	2	1	2	2	2	2	2	2	2	2	2	2	2	2	2	4	2
MB-0465	2	3	3	3	1	2	2	2	2	2	2	1	2	1	2	1	2	2	2	3	1	2	2	2	1
MB-0630	2	2	2	2	2	2	2	2	2	2	2	2	2	2	2	2	2	2	2	2	2	2	2	3	2
MB-0036	1	1	1	1	1	1	1	1	1	1	1	1	1	1	1	1	1	1	1	1	1	1	1	2	1
MB-0166	1	1	1	1	1	1	1	1	1	1	1	1	1	1	1	1	1	1	1	1	1	1	1	1	1
MB-0180	1	1	1	1	1	1	1	1	1	1	1	1	1	1	1	1	1	1	1	1	1	1	1	1	1
MB-0525	5	5	5	5	5	5	5	5	5	5	5	5	5	5	5	5	3	5	3	5	5	5	5	2	3
MB-0307	4	4	4	4	1	1	4	1	4	1	4	3	4	1	4	4	4	1	4	4	4	1	1	1	4
MB-0002	1	1	1	1	1	1	1	1	1	1	1	1	1	1	1	1	1	1	1	1	1	1	1	1	1
MB-0408	1	1	1	1	1	1	1	1	1	1	1	1	1	1	1	1	2	1	1	1	1	1	1	4	1
MB-0466	1	1	1	1	4	1	1	1	1	1	1	1	1	1	1	1	1	1	4	1	1	1	1	1	1
MB-0632	1	1	1	1	4	1	1	1	1	1	4	3	1	1	1	1	1	3	4	1	4	1	1	4	3
MB-0120	2	2	2	2	1	2	2	2	2	1	2	2	2	1	1	2	2	2	2	2	1	2	2	2	2
MB-0507	1	1	1	1	1	1	1	1	1	1	1	1	1	1	1	1	1	1	1	1	1	1	1	1	1
MB-0287	2	2	2	2	2	2	2	2	2	2	2	2	1	2	2	2	1	2	1	2	1	2	2	4	1
MB-0869	5	5	5	5	5	5	5	5	5	5	5	5	5	5	5	5	5	5	5	5	5	5	5	5	5
MB-4633	1	1	1	1	1	1	1	1	1	1	1	1	1	1	1	1	1	1	1	1	1	1	1	1	1
MB-4627	1	1	1	1	1	1	1	1	1	1	1	1	1	1	1	1	1	1	1	1	1	1	1	1	1
MB-4004	1	1	1	1	2	2	2	2	2	2	1	1	2	1	2	1	1	1	1	1	2	2	1	1	1
MB-4708	1	1	1	1	1	1	1	1	1	1	1	1	1	1	1	1	1	1	1	1	1	1	1	1	1
MB-4618	1	2	1	1	1	1	1	1	1	1	2	2	1	2	1	1	1	2	1	1	2	1	1	2	2
MB-4641	1	1	1	1	1	1	1	1	1	1	1	1	1	1	1	1	1	1	1	1	1	1	1	1	1
MB-4622	5	5	5	5	5	5	5	5	5	5	5	5	5	5	5	5	5	5	5	5	5	5	5	5	5
MB-4634	1	1	1	1	1	1	1	1	1	1	1	1	1	1	1	1	1	1	1	2	1	1	1	1	1
MB-4688	2	2	2	2	2	2	2	2	2	2	2	2	2	2	2	2	2	2	2	2	2	2	2	2	2
MB-4665	1	1	1	1	1	1	1	1	1	1	1	1	1	1	1	1	1	1	1	1	2	1	1	1	1
MB-4666	1	1	1	1	1	1	1	1	1	1	4	1	1	1	1	1	1	1	3	1	1	1	1	1	1
MB-4640	3	3	3	3	3	3	3	3	3	3	3	3	3	3	3	3	3	3	3	3	3	3	3	3	3
MB-4691	1	1	1	1	1	1	1	1	1	1	1	1	1	1	1	1	1	1	1	1	1	1	1	1	1
MB-4671	2	2	2	2	1	1	2	1	2	2	2	2	2	2	1	2	2	2	1	2	2	1	2	2	1
MB-4667	3	3	3	3	3	3	3	3	1	1	4	3	3	3	3	3	1	3	4	3	4	3	1	3	1
MB-4721	1	1	1	1	1	1	1	1	1	1	1	1	1	1	1	1	1	1	1	1	1	1	1	1	1
MB-4723	2	2	2	2	2	2	2	2	1	2	2	2	2	2	2	2	2	2	2	2	1	2	2	2	2
MB-4718	4	4	4	4	1	4	4	4	1	1	4	4	4	4	1	1	4	4	4	4	4	1	1	1	1
MB-4716	1	1	1	1	1	1	1	1	1	1	1	1	1	1	1	1	1	1	1	1	1	1	1	2	2
MB-4729	1	3	3	3	1	1	1	1	3	1	1	1	2	1	1	2	2	1	2	3	1	3	1	1	1
MB-4717	5	5	5	5	5	5	5	5	5	5	5	5	5	5	5	5	5	5	5	5	5	5	5	5	5
MB-4724	3	3	3	3	3	3	3	3	3	3	3	3	3	3	3	3	3	3	3	3	3	3	3	3	3
MB-4770	3	3	3	3	3	3	3	3	3	3	3	3	3	5	5	3	3	5	3	3	5	3	3	3	3
MB-4752	1	1	1	1	1	1	1	1	1	1	1	1	1	1	1	1	1	2	1	1	1	1	1	1	2
MB-4762	1	1	1	1	1	1	1	1	1	1	1	1	1	1	1	1	1	1	1	1	1	1	1	3	1
MB-5169	2	2	2	2	1	2	1	1	1	1	2	2	1	1	2	2	2	2	1	2	2	1	2	1	2
MB-4796	2	2	2	2	2	2	2	2	2	2	2	2	2	2	2	2	2	2	2	2	2	2	2	2	2
MB-4790	1	1	1	1	1	1	1	1	1	1	1	1	1	1	1	1	1	1	1	1	1	1	1	4	1
MB-4797	1	2	1	2	1	1	1	1	2	1	2	1	1	1	1	2	1	1	2	2	2	1	1	1	1
MB-4800	1	1	1	1	1	1	1	1	1	1	1	1	1	1	1	1	1	1	1	1	1	1	1	1	1
MB-5541	1	4	4	4	4	1	1	1	4	1	4	1	1	1	1	1	1	1	1	4	1	1	1	1	1
MB-5549	3	3	3	3	3	3	3	3	3	3	3	3	3	3	3	3	5	3	3	3	3	3	3	3	3
MB-5519	2	2	2	2	2	2	2	2	2	2	1	2	2	2	2	2	2	1	2	2	2	2	2	1	2
MB-5495	1	1	1	1	1	1	1	1	1	1	1	1	1	1	1	1	1	1	1	1	1	1	1	1	1
MB-4832	1	1	1	1	1	1	1	1	1	1	1	1	1	1	1	1	1	1	1	1	1	1	1	1	1
MB-4745	3	3	3	3	5	3	3	3	3	5	5	5	5	3	3	3	3	3	5	3	5	3	3	5	5
MB-4825	1	1	1	1	1	1	1	1	1	1	2	1	1	2	1	1	1	2	1	1	1	1	1	1	1
MB-4814	4	4	4	4	4	4	4	4	4	4	1	4	1	4	4	1	1	1	4	4	4	4	1	4	4
MB-4757	5	5	5	5	5	5	5	5	5	5	5	5	5	5	5	5	5	5	5	5	5	5	5	5	5
MB-4694	5	5	5	5	5	5	5	5	5	5	4	2	4	5	5	2	5	5	5	5	4	5	5	2	4
MB-4698	1	1	1	1	1	1	1	1	1	1	1	1	1	1	1	1	1	1	1	1	1	1	1	1	1
MB-4715	5	5	5	5	5	5	5	5	5	5	5	5	5	5	5	5	5	5	5	5	5	5	5	5	5
MB-4685	2	2	2	2	3	2	2	2	2	2	2	2	2	2	2	2	1	2	2	2	2	2	2	2	2
MB-4712	INC	3	3	3	4	4	4	4	4	1	5	3	3	1	4	3	3	3	5	3	3	4	1	1	3
MB-4672	2	2	2	2	2	2	2	2	1	1	2	2	1	1	2	2	2	1	2	2	1	1	1	2	2
MB-4704	1	1	1	1	1	1	1	1	1	1	1	1	1	1	1	1	1	1	1	1	1	1	1	1	1
MB-4655	1	2	2	2	1	1	1	1	1	1	1	1	1	1	1	1	1	1	1	2	1	1	1	1	1
MB-4651	2	2	2	2	2	2	2	2	2	2	2	2	2	2	2	2	2	2	2	2	2	2	2	2	2
MB-4661	1	1	1	1	1	1	1	1	1	1	2	1	1	1	1	1	1	1	1	1	2	1	1	2	1
MB-4649	2	2	2	2	1	2	2	2	1	1	2	2	2	2	1	2	2	2	2	2	2	2	1	2	2
MB-4642	2	2	2	2	2	2	2	2	2	2	2	2	2	2	2	2	1	2	2	2	2	2	1	2	2
MB-4674	1	1	1	1	1	1	1	1	1	1	1	1	1	1	1	1	1	2	1	1	1	1	1	1	1
MB-4648	2	2	2	2	2	2	2	2	2	2	2	2	2	2	2	2	2	2	2	2	2	2	2	2	2
MB-5197	1	2	2	2	1	1	1	1	1	1	1	1	1	1	1	1	1	1	1	2	1	1	1	2	1
MB-5152	1	1	1	1	2	2	1	2	1	1	1	1	1	1	2	2	1	1	1	1	1	1	1	2	1
MB-5201	1	1	1	1	1	1	1	1	1	1	1	1	1	1	1	1	1	1	1	1	1	1	1	1	1
MB-5189	1	1	1	1	1	1	1	1	1	1	1	1	1	1	1	1	1	1	1	1	1	1	1	1	1
MB-5281	INC	4	4	4	3	3	3	3	3	4	1	3	1	3	3	1	3	3	1	4	4	3	1	4	3
MB-5212	2	2	2	2	2	2	2	2	2	2	2	2	2	2	2	2	2	2	2	2	2	2	2	2	2
MB-5172	3	3	3	3	3	3	3	3	3	2	3	3	3	3	3	3	3	3	3	3	3	3	3	3	3
MB-5183	1	1	1	1	1	1	1	1	1	1	1	1	1	1	1	1	1	1	1	1	1	1	1	1	1
MB-5185	1	2	2	2	1	1	1	1	1	1	2	1	2	1	1	1	1	2	1	2	1	1	1	1	2
MB-5022	3	3	3	3	3	3	3	3	3	3	3	3	1	3	3	3	2	3	3	3	3	3	3	1	3
MB-5014	2	2	2	2	2	2	2	2	2	2	2	2	2	2	2	2	2	2	2	2	2	2	2	2	2
MB-4994	2	2	2	2	2	2	2	2	2	2	2	2	2	2	2	2	2	2	2	2	2	2	2	2	2
MB-5017	INC	2	3	3	3	3	3	3	5	2	2	2	2	2	3	2	1	2	1	3	2	3	2	1	2
MB-4982	3	3	3	3	3	3	3	3	3	3	5	5	5	3	3	3	3	3	5	3	5	3	3	4	5
MB-5004	INC	3	3	3	1	3	3	3	1	1	3	2	3	3	1	2	2	5	2	3	1	3	2	2	2
MB-4986	1	4	4	4	1	1	1	1	1	1	4	1	1	1	1	1	1	1	1	4	1	1	1	1	4
MB-5327	3	3	3	3	3	3	3	3	3	3	3	3	3	3	3	3	3	3	3	3	3	3	3	3	3
MB-5341	2	2	2	2	1	1	1	1	1	1	2	2	2	2	1	2	2	2	2	2	2	1	2	1	2
MB-5323	5	5	5	5	5	5	5	5	5	5	5	5	5	5	5	5	5	5	5	5	5	5	5	5	5
MB-5328	2	2	2	2	2	2	2	2	2	2	2	2	2	1	2	2	2	2	2	2	1	2	2	1	2
MB-5318	INC	3	3	3	2	2	2	2	2	2	2	2	1	1	2	1	1	1	2	3	4	2	2	3	1
MB-5287	1	1	1	1	1	1	1	1	1	1	1	1	1	1	1	1	1	1	1	1	1	1	1	1	1
MB-5324	1	1	1	1	1	1	1	1	1	1	1	1	1	1	1	1	1	1	1	1	1	1	1	1	1
MB-4682	1	1	1	1	1	1	1	1	2	2	1	1	1	1	1	1	1	1	1	1	1	1	1	1	1
MB-4710	1	1	1	1	1	1	1	1	1	1	1	1	1	1	1	1	4	1	1	1	1	1	1	1	1
MB-4701	1	1	1	1	1	1	1	1	1	1	1	1	1	1	1	1	1	1	1	1	1	1	1	1	1
MB-4709	1	1	1	1	1	1	1	1	1	1	1	1	1	1	1	1	1	1	1	1	1	1	1	1	1
MB-4686	1	1	1	1	1	1	1	1	1	1	1	1	1	1	1	1	1	1	1	1	1	1	1	1	1
MB-4706	1	1	1	1	1	1	1	1	1	1	1	1	1	1	1	1	1	1	1	1	1	1	1	1	1
MB-4719	1	1	1	1	1	1	1	1	1	1	1	1	1	1	1	1	1	1	1	1	1	1	1	1	1
MB-4702	2	2	2	2	2	2	2	2	2	2	2	2	2	2	2	2	2	2	2	2	2	2	2	2	2
MB-4908	2	2	2	2	2	2	2	2	2	2	2	2	2	2	2	2	2	2	2	2	2	2	2	1	2
MB-4871	5	3	5	5	4	5	5	5	3	3	3	5	5	5	5	5	3	3	2	5	3	5	5	5	5
MB-4906	1	1	1	1	1	1	1	1	1	1	1	1	1	1	1	1	1	1	1	1	1	1	1	1	1
MB-4911	5	5	5	5	5	5	5	5	5	5	5	5	5	5	5	5	5	5	5	5	5	5	5	5	5
MB-4866	1	1	1	1	1	1	1	1	1	1	1	1	1	1	1	1	1	1	1	1	1	1	1	1	1
MB-4858	1	3	3	3	1	1	1	3	3	1	1	1	1	3	3	1	1	1	1	3	1	1	1	1	1
MB-4862	2	2	2	2	2	2	2	2	2	2	2	2	2	2	2	2	2	2	2	2	2	2	2	2	2
MB-4872	1	1	1	1	1	1	1	1	1	1	1	1	1	1	1	1	1	1	1	1	1	1	1	1	1
MB-4887	1	4	4	4	1	1	1	1	1	4	1	1	1	4	1	1	1	3	2	4	1	1	1	2	4
MB-4867	1	1	1	1	1	1	1	1	1	1	1	1	1	1	1	1	1	1	1	1	1	1	1	1	1
MB-4888	5	5	5	5	5	5	5	5	5	5	5	5	5	5	5	5	5	5	5	5	5	5	5	5	5
MB-4929	3	3	3	3	1	3	3	3	3	2	1	3	1	3	3	3	1	3	3	3	3	3	3	3	3
MB-4945	5	5	5	5	4	5	5	5	5	5	5	5	5	5	5	5	5	3	5	5	5	5	5	5	5
MB-4930	2	2	2	2	2	2	2	2	2	2	2	2	2	2	2	2	2	2	2	2	2	2	2	2	2
MB-4894	2	2	2	2	2	2	2	2	2	1	2	2	2	2	2	2	1	2	1	2	2	2	2	1	2
MB-4898	1	1	1	1	1	1	1	1	1	1	1	1	1	1	1	1	1	1	1	1	1	1	1	1	1
MB-4670	1	1	1	1	1	1	1	1	1	1	1	1	1	1	1	1	1	1	1	1	1	1	1	1	1
MB-5013	1	1	1	1	1	1	1	1	1	1	1	1	1	1	1	1	1	1	1	1	1	1	1	1	1
MB-4977	1	1	1	1	1	1	1	1	1	1	1	2	1	1	1	1	1	1	1	1	2	1	1	2	1
MB-4967	1	1	1	1	1	1	1	1	1	1	1	1	1	1	1	1	1	1	1	1	1	1	1	1	1
MB-4981	1	1	1	1	1	1	1	1	1	1	1	1	1	1	1	1	1	1	1	1	1	1	1	1	1
MB-4003	2	3	2	2	2	2	2	2	2	2	2	2	2	2	2	2	2	3	2	2	2	2	2	3	2
MB-4968	1	1	1	1	1	1	1	1	1	1	1	1	1	1	1	1	1	1	1	1	1	1	1	1	1
MB-5052	3	3	3	3	5	3	3	3	5	3	3	3	3	3	5	3	3	3	3	3	3	3	3	3	3
MB-5049	2	2	2	2	2	2	2	2	1	2	1	2	2	2	2	2	2	2	2	2	1	2	2	2	2
MB-5041	INC	3	3	3	2	2	2	3	3	3	4	3	5	3	2	2	2	3	1	3	5	3	3	1	5
MB-5044	2	2	2	2	2	2	2	2	2	2	2	2	2	2	2	2	2	2	2	2	2	2	2	2	2
MB-5072	3	3	3	3	3	3	3	3	3	3	4	3	3	3	4	3	3	3	3	3	3	3	3	3	4
MB-4171	2	2	2	2	1	3	3	3	1	1	2	2	3	2	3	2	2	3	2	2	3	1	2	2	2
MB-5053	1	1	1	1	1	1	1	1	1	1	1	1	1	1	1	1	1	1	1	1	1	1	1	1	1
MB-5045	INC	2	3	3	1	3	1	1	2	1	4	1	2	1	1	1	2	2	2	3	2	1	2	2	2
MB-5116	2	2	2	2	2	2	2	2	2	2	2	2	2	2	2	2	2	2	2	2	2	2	2	2	2
MB-5120	3	3	3	3	3	3	3	3	3	2	3	3	3	3	3	3	3	3	3	3	3	3	3	5	3
MB-5074	1	2	2	2	1	1	1	1	2	1	1	1	1	1	1	1	1	1	1	2	1	1	2	1	1
MB-5119	1	1	1	1	1	1	1	1	1	1	1	1	1	1	1	1	1	1	1	1	1	1	1	1	1
MB-5114	INC	3	3	3	4	4	4	3	3	5	3	3	3	3	4	5	5	5	5	3	3	4	3	5	5
MB-4230	1	2	2	2	1	1	1	1	1	1	1	1	2	1	1	1	1	2	1	2	1	1	1	1	2
MB-4154	2	2	2	2	5	2	2	2	2	2	2	2	2	2	5	2	2	2	2	2	2	2	2	2	2
MB-5115	5	5	5	5	5	5	5	5	5	5	5	5	5	5	5	5	5	5	5	5	5	5	5	5	5
MB-4737	2	2	2	2	2	2	2	2	2	2	2	2	2	2	2	2	2	2	2	2	2	2	2	2	2
MB-4764	1	1	1	1	1	1	1	1	1	1	1	1	1	1	1	1	1	1	1	1	1	1	1	1	1
MB-4735	1	1	1	1	1	1	1	1	1	1	1	1	1	1	1	1	1	1	1	1	1	1	1	1	1
MB-4730	1	1	1	1	1	1	1	1	1	1	1	1	1	1	1	1	1	1	1	1	1	1	1	1	1
MB-4733	5	5	5	5	5	5	5	5	5	5	3	5	5	4	5	5	3	4	3	5	5	5	5	4	4
MB-4758	5	5	5	5	4	5	5	5	5	5	5	5	5	5	5	5	5	5	5	5	5	5	5	5	5
MB-5033	2	1	2	2	1	1	2	2	2	2	2	2	2	1	1	2	1	2	2	2	2	1	1	1	1
MB-4741	2	2	2	2	2	2	2	2	1	1	2	1	2	2	2	1	1	1	1	2	1	2	1	2	2
MB-4732	5	5	5	5	5	5	5	5	5	5	5	5	5	5	5	5	5	5	5	5	5	5	5	5	5
MB-5305	1	1	1	1	1	1	1	1	1	1	1	1	1	1	1	1	1	1	1	1	1	1	1	1	1
MB-5256	1	1	1	1	1	1	1	1	1	2	1	1	1	1	1	1	1	1	1	1	2	1	1	1	1
MB-5273	2	2	2	2	2	2	2	2	2	2	2	2	2	2	2	2	2	2	2	2	2	2	2	2	2
MB-5236	5	5	5	5	5	5	5	5	5	5	5	5	5	5	5	5	5	5	5	5	5	5	5	5	5
MB-5238	4	4	4	4	4	4	4	4	5	3	4	4	4	4	4	5	4	4	4	4	4	4	4	3	1
MB-5233	2	2	2	2	2	2	2	2	2	2	2	2	2	2	2	2	2	2	2	2	2	2	2	2	2
MB-5244	2	2	2	2	2	2	2	2	2	2	2	2	2	2	2	2	2	2	2	2	2	2	2	2	1
MB-5253	1	1	1	1	1	1	1	1	1	1	1	1	1	1	1	1	1	1	1	1	1	1	1	1	1
MB-5260	2	2	2	2	2	2	2	2	2	2	2	2	2	1	2	2	2	1	2	2	1	2	2	2	2
MB-4998	2	2	2	2	1	2	1	1	1	2	1	2	2	2	1	2	1	2	2	2	1	1	2	2	2
MB-4993	3	3	3	3	3	3	3	3	4	3	4	5	4	3	3	3	3	3	5	3	5	3	3	3	5
MB-5001	1	1	1	1	1	1	1	1	2	2	1	1	1	4	1	1	1	1	1	1	1	1	1	2	1
MB-5084	1	1	1	1	1	1	1	1	1	1	1	1	1	1	1	1	1	1	1	1	1	1	1	1	1
MB-4969	1	1	1	1	1	1	1	1	1	1	1	1	1	1	1	1	1	1	1	1	1	1	1	1	1
MB-4999	1	4	4	4	4	1	1	1	1	1	1	1	1	1	1	1	1	1	1	4	1	1	1	4	1
MB-5011	1	1	1	1	1	1	1	1	1	1	1	1	1	1	1	1	1	1	1	1	1	1	1	1	1
MB-4959	1	1	1	1	1	1	1	1	1	1	1	1	1	1	1	1	1	1	1	1	1	1	1	1	1
MB-4599	1	1	1	1	1	1	1	1	1	1	1	1	1	1	1	1	1	1	1	1	1	1	1	1	1
MB-4616	1	1	1	1	1	1	1	1	1	1	1	1	1	1	1	1	1	1	1	1	1	1	1	1	1
MB-4623	1	1	1	1	1	1	1	1	1	2	1	1	1	1	1	1	1	1	3	1	1	1	1	1	1
MB-4644	2	2	2	2	2	2	2	2	2	2	2	2	2	2	2	2	1	2	2	2	2	2	2	2	1
MB-4869	1	1	1	1	1	1	1	1	1	1	2	1	1	1	1	1	1	1	1	1	1	1	1	1	1
MB-4878	1	1	4	1	4	1	1	1	1	1	1	1	1	1	1	1	1	1	1	4	1	1	1	1	2
MB-4851	1	2	2	2	1	2	2	1	2	1	2	1	1	2	1	1	1	2	1	2	1	1	1	2	1
MB-4233	2	2	2	2	2	2	2	2	2	2	2	2	2	2	2	2	2	2	2	2	2	2	2	2	2
MB-4937	2	2	2	2	5	2	2	2	2	2	2	1	2	2	2	2	1	2	3	2	1	2	2	1	2
MB-4934	2	2	2	2	2	2	2	2	1	2	1	2	2	2	2	2	2	2	2	2	2	2	2	2	2
MB-4899	1	1	1	1	1	1	1	1	1	1	1	1	1	1	1	1	1	1	1	1	1	1	1	1	1
MB-4912	2	2	2	2	2	2	2	2	2	2	1	2	2	2	2	2	2	2	1	2	1	2	2	3	2
MB-4935	3	3	3	3	3	3	3	3	3	3	3	3	3	3	3	3	3	3	3	3	3	3	3	5	3
MB-4933	1	2	2	2	1	1	1	1	1	1	1	1	2	2	4	2	2	3	1	2	1	1	1	1	1
MB-4900	2	2	2	2	2	2	2	2	2	2	2	2	2	2	2	2	2	2	2	2	2	2	2	2	1
MB-4941	1	1	1	1	1	1	1	1	1	1	1	1	1	1	4	1	1	1	1	1	1	1	1	1	1
MB-5221	1	1	1	1	1	1	1	1	1	1	1	1	1	1	1	1	1	1	1	1	1	1	1	1	1
MB-5139	2	2	2	2	2	2	2	2	2	1	2	2	2	2	2	2	1	2	2	2	2	2	1	2	1
MB-5222	5	5	5	5	2	5	5	5	5	3	5	5	3	5	5	3	1	5	3	5	3	5	3	5	3
MB-5097	2	2	2	2	2	2	2	2	2	1	2	2	2	2	2	1	2	1	1	2	2	2	2	1	1
MB-5338	2	2	2	2	2	2	2	2	2	2	2	2	2	2	2	2	2	2	2	2	2	2	2	2	1
MB-5315	3	3	3	3	5	3	3	3	3	3	3	5	5	3	3	5	3	3	5	3	5	3	3	3	5
MB-5195	2	2	3	3	3	3	3	2	2	2	2	2	2	2	3	2	2	2	1	3	1	3	2	2	2
MB-5226	2	2	2	2	2	2	2	2	2	2	2	2	2	2	2	2	2	2	2	2	2	2	2	2	2
MB-5232	5	5	5	5	5	5	5	5	5	5	5	5	5	5	5	5	1	5	5	5	5	5	5	5	5
MB-5160	2	2	2	2	2	2	2	2	2	2	2	2	2	2	2	2	2	2	2	2	2	2	2	2	2
MB-5126	5	5	5	5	2	5	5	5	5	5	5	5	5	5	2	5	5	5	5	5	5	5	5	5	5
MB-5124	2	2	2	2	2	2	2	2	2	1	2	2	2	2	2	2	2	2	2	2	2	2	2	2	1
MB-4855	1	1	1	1	1	1	1	1	1	1	2	1	1	1	1	1	1	1	1	1	1	1	1	1	2
MB-5279	1	2	2	2	1	1	1	1	2	1	2	1	1	2	1	1	1	1	1	2	1	1	1	1	1
MB-4173	1	1	1	1	1	1	1	1	1	1	1	1	1	1	1	1	1	1	1	1	1	1	1	1	1
MB-5145	4	4	5	5	4	4	4	4	4	4	4	4	4	4	4	4	4	4	4	5	4	4	4	3	4
MB-4944	2	2	2	2	2	2	2	2	2	2	2	2	2	2	2	2	2	2	2	2	2	2	2	2	2
MB-4961	1	1	1	1	1	1	1	1	1	1	1	1	1	2	1	1	1	1	1	1	1	1	1	1	1
MB-5121	2	2	2	2	2	2	2	2	2	2	2	2	2	2	2	2	2	2	2	2	2	2	2	2	2
MB-4956	2	2	2	2	2	2	2	2	2	2	2	2	2	2	2	2	1	2	2	2	2	2	2	2	2
MB-4886	3	3	3	3	3	3	3	3	3	3	3	3	3	3	3	3	3	3	3	3	3	3	3	3	3
MB-4950	1	1	1	1	1	1	1	1	1	1	2	1	1	1	1	1	2	2	1	1	1	1	1	1	1
MB-4965	1	1	1	1	1	1	1	1	1	1	1	1	1	1	1	1	2	1	1	1	1	1	1	1	1
MB-4962	1	1	1	1	1	1	1	1	1	1	1	1	1	1	1	1	1	1	1	1	1	1	1	1	1
MB-4952	3	3	3	3	3	3	3	3	3	3	3	3	3	3	3	3	2	3	3	3	5	3	3	5	3
MB-5267	1	4	1	1	1	4	1	1	1	1	4	1	1	1	1	1	1	1	4	1	3	1	1	1	1
MB-5266	2	2	2	2	2	2	2	2	2	2	2	2	2	2	2	2	2	2	2	2	2	2	2	2	2
MB-5396	2	2	2	2	2	2	2	2	2	2	2	2	2	2	2	2	2	2	2	2	2	2	2	2	2
MB-4938	5	5	5	5	5	5	5	5	5	5	5	5	5	5	5	5	5	5	5	5	5	5	5	5	5
MB-5351	4	4	4	4	4	4	4	4	4	4	4	4	4	4	4	4	1	4	4	4	4	4	4	1	4
MB-5347	2	2	2	2	2	2	2	2	2	2	2	2	2	2	2	2	2	2	2	2	2	2	2	2	2
MB-5312	3	3	3	3	5	5	5	3	5	5	3	3	3	3	5	3	3	3	5	3	3	5	3	5	3
MB-5311	1	4	4	4	1	1	1	1	1	1	1	1	1	1	1	1	1	4	1	4	1	1	1	1	1
MB-5284	1	1	1	1	1	1	1	1	1	1	1	1	1	1	1	1	1	1	1	1	1	1	1	1	1
MB-4148	2	2	2	2	2	2	2	2	1	2	2	2	2	2	2	2	2	2	2	2	2	2	2	2	2
MB-5078	INC	2	3	3	1	2	3	2	1	2	1	1	2	2	3	2	3	2	2	3	3	1	2	3	1
MB-5088	1	2	2	2	2	2	1	1	1	1	1	1	2	1	1	1	1	1	1	2	1	1	1	1	2
MB-5064	1	1	1	1	1	1	1	1	1	1	1	1	1	1	1	1	1	1	1	1	1	1	1	1	1
MB-5107	2	2	2	2	2	2	2	2	2	2	2	2	2	2	2	2	2	2	2	2	2	2	2	2	2
MB-5066	1	1	1	1	1	1	1	1	1	1	1	1	1	1	1	1	1	1	1	1	1	1	1	1	1
MB-5068	1	1	1	1	1	1	1	1	1	1	1	1	1	1	1	1	1	1	1	1	1	1	1	1	1
MB-5061	2	2	2	2	2	2	2	2	2	2	2	2	2	2	2	2	2	2	1	2	2	2	2	2	2
MB-5070	5	5	5	5	5	5	5	5	5	5	5	5	5	5	5	5	5	5	5	5	5	5	5	5	5
MB-5059	1	1	1	1	1	1	1	1	1	1	1	1	1	1	1	1	1	1	1	1	1	1	1	1	1
MB-4266	2	2	2	2	1	2	1	1	2	1	2	1	2	1	1	2	1	2	2	2	2	1	2	1	2
MB-4276	3	3	3	3	3	3	1	3	3	3	1	2	2	3	3	3	3	3	1	3	1	3	1	3	2
MB-4771	1	1	1	1	1	1	1	1	1	2	1	1	1	1	1	1	1	2	1	1	1	1	1	1	2
MB-4739	1	1	1	1	1	1	1	1	1	1	1	1	1	1	1	1	1	1	1	1	1	1	1	1	1
MB-5331	1	1	4	1	1	1	1	1	1	1	1	1	1	1	1	1	1	1	1	4	1	1	1	1	1
MB-4743	4	4	4	4	4	4	4	4	4	1	4	4	4	4	1	1	1	4	4	4	4	4	4	4	4
MB-4785	1	2	2	2	1	1	1	1	1	1	2	2	2	2	1	2	1	1	1	2	1	1	2	2	1
MB-4778	1	1	1	1	2	1	1	1	1	1	1	1	1	1	1	1	1	1	1	1	1	1	1	1	1
MB-4763	3	3	3	3	3	3	3	3	3	3	3	3	3	3	3	3	3	3	3	3	3	3	3	3	3
MB-4779	1	1	1	1	1	1	1	1	1	1	1	1	1	1	1	1	1	1	1	4	1	1	1	1	1
MB-4849	1	1	1	1	1	1	1	1	1	1	1	1	1	1	1	1	1	1	1	1	1	1	1	1	1
MB-4787	1	1	1	1	1	1	1	1	1	1	1	1	1	1	1	1	1	1	1	1	1	1	1	1	1
MB-4767	1	1	1	1	2	2	2	2	2	1	2	1	1	2	2	1	1	4	1	1	1	2	1	1	2
MB-4784	1	1	1	1	1	1	1	1	1	1	1	1	1	1	1	1	2	1	1	1	1	1	1	1	1
MB-5043	1	1	1	1	1	1	1	1	1	1	1	1	1	1	1	1	2	1	1	1	1	1	1	1	1
MB-4992	1	1	1	1	1	1	1	1	1	3	3	3	1	1	3	1	1	3	3	1	3	1	1	3	3
MB-5020	1	1	1	1	1	1	1	1	1	1	1	1	1	1	1	1	1	2	1	1	1	1	1	1	2
MB-5019	INC	3	3	3	4	5	5	3	5	4	3	3	3	5	5	5	1	1	5	3	4	4	3	4	3
MB-5015	1	1	1	1	1	1	1	1	1	1	1	1	1	1	1	1	1	1	2	1	1	1	1	1	1
MB-5048	1	1	1	1	1	1	1	1	1	1	1	1	1	1	1	1	1	1	2	1	1	1	1	1	1
MB-5035	1	1	1	1	4	1	1	1	1	1	4	1	2	4	1	1	1	1	4	1	4	1	1	1	1
MB-5398	1	1	1	1	1	1	1	1	1	1	1	1	1	1	1	1	1	1	1	1	1	1	1	1	1
MB-5377	1	1	1	1	1	1	1	1	2	2	1	1	1	1	1	1	1	1	2	1	1	1	2	1	2
MB-5291	2	2	2	2	2	2	2	2	1	2	2	2	2	2	2	2	2	2	2	2	2	2	2	2	2
MB-5403	1	1	1	1	1	1	1	1	1	1	1	1	1	1	1	1	1	1	1	1	1	1	1	1	1
MB-5224	1	1	1	1	1	1	1	1	1	1	1	1	1	1	1	1	1	1	1	1	1	1	1	1	1
MB-5369	1	1	1	1	1	2	1	1	1	1	1	1	1	1	1	1	1	2	2	1	1	1	2	1	2
MB-5404	1	1	1	1	1	1	1	1	1	1	2	1	1	1	1	1	1	1	1	1	1	1	1	1	1
MB-5397	1	1	1	1	1	1	1	1	1	1	1	1	1	1	1	1	1	1	1	1	1	1	1	1	1
MB-5378	5	5	5	5	5	5	5	5	5	5	5	5	5	5	5	5	5	5	5	5	5	5	5	5	5
MB-5388	1	1	1	1	1	1	1	1	1	1	1	1	1	1	1	1	1	1	1	1	1	1	1	1	1
MB-5395	1	1	1	1	1	1	1	1	1	1	1	1	1	1	1	1	1	1	1	1	1	1	1	1	1
MB-5365	1	1	1	1	1	1	1	1	1	1	1	1	1	1	1	1	1	1	1	1	1	1	1	1	1
MB-5389	1	1	1	1	1	2	1	1	1	1	1	2	1	1	1	1	1	1	1	1	2	1	2	2	1
MB-5385	1	1	1	1	1	1	1	1	2	1	1	1	1	1	1	1	1	1	1	1	1	1	1	1	1
MB-5393	1	1	1	1	1	1	1	1	2	2	1	1	1	1	2	1	1	2	1	1	1	1	1	1	1
MB-5289	1	1	1	1	1	1	1	1	1	1	1	1	1	1	1	1	1	1	1	1	1	1	1	1	1
MB-5361	2	2	2	2	2	2	2	2	2	2	2	2	2	1	2	1	2	2	2	2	1	2	2	2	1
MB-5392	3	3	3	3	2	3	3	3	3	3	3	4	3	3	3	3	3	4	3	3	3	3	3	2	3
MB-5147	1	1	1	1	1	1	1	1	1	1	1	1	1	1	3	1	1	1	2	1	1	1	1	1	3
MB-4140	1	1	1	1	1	1	1	1	1	1	1	1	1	1	1	1	1	1	1	1	1	1	1	1	1
MB-5138	5	5	5	5	5	5	5	5	5	5	5	5	5	5	5	5	5	5	5	5	5	5	5	5	5
MB-5123	1	1	1	1	1	1	1	1	1	1	1	1	1	1	1	1	1	1	1	1	1	1	1	1	1
MB-5065	5	5	5	5	5	5	5	5	5	5	5	5	5	5	5	5	5	2	5	5	5	5	5	5	5
MB-4127	3	3	3	3	3	3	3	3	3	2	3	3	3	3	3	3	2	3	1	3	3	3	3	3	3
MB-5058	INC	4	4	4	5	3	3	3	3	1	1	3	3	1	3	1	3	3	3	4	4	3	3	4	1
MB-5050	1	1	1	1	1	1	1	1	1	1	1	1	1	1	1	1	1	1	1	1	1	1	1	1	1
MB-5027	1	1	1	1	1	1	1	1	1	1	1	1	1	1	1	1	1	1	1	1	1	1	1	1	1
MB-5060	2	2	2	2	2	2	2	2	1	1	3	1	2	2	2	2	2	2	2	2	2	2	2	1	2
MB-5062	2	2	2	2	2	2	2	2	2	2	2	2	2	2	2	2	2	2	2	2	2	2	2	3	2
MB-5383	1	2	1	1	2	2	2	1	1	1	1	1	1	1	1	1	1	2	1	1	1	2	1	2	1
MB-5101	2	2	2	2	2	2	2	2	1	2	2	2	2	2	2	2	2	2	2	2	2	2	2	2	1
MB-5258	5	5	5	5	5	5	5	5	5	5	5	5	5	5	5	5	5	5	5	5	5	5	5	5	5
MB-5268	1	4	1	1	1	1	1	1	1	1	1	1	1	1	1	1	1	1	1	1	1	1	1	1	1
MB-5261	2	2	2	2	2	2	2	2	2	2	2	2	2	2	2	2	2	2	2	2	2	2	2	1	2
MB-5272	INC	3	3	3	4	5	4	3	1	1	4	3	5	5	4	4	2	5	3	3	3	5	5	5	5
MB-5264	1	1	1	1	1	1	1	1	1	1	1	1	1	1	1	1	1	1	1	1	1	1	1	1	1
MB-5259	3	3	3	3	3	3	3	3	3	3	3	3	3	3	3	3	5	3	1	3	3	3	3	3	3
MB-5306	2	2	2	2	1	1	1	1	1	1	2	2	1	2	1	2	2	2	2	2	2	1	2	2	2
MB-5270	1	1	1	1	1	2	1	1	1	1	2	1	2	1	2	1	1	1	2	1	1	1	1	2	2
MB-5411	3	3	3	3	3	3	3	3	3	3	3	3	3	3	3	3	3	3	3	3	5	3	3	3	3
MB-5490	1	1	1	1	1	1	1	1	1	2	1	1	1	1	1	1	1	1	2	1	1	1	1	1	1
MB-5421	5	5	5	5	5	5	5	5	5	5	5	5	5	5	5	5	5	4	5	5	5	5	5	5	5
MB-5348	5	5	5	5	5	5	5	5	5	5	5	5	5	5	5	5	5	5	5	5	5	5	5	5	5
MB-5429	1	1	1	1	1	1	1	1	1	1	1	1	1	1	1	1	1	1	1	1	1	1	1	1	1
MB-5405	2	2	2	2	2	2	2	2	1	2	2	2	2	2	2	2	2	3	2	2	2	2	2	2	2
MB-5414	2	2	3	3	2	2	2	2	2	2	3	1	2	3	2	2	2	1	2	3	1	2	2	2	2
MB-5489	1	1	1	1	1	1	1	1	1	1	1	1	1	1	1	1	1	1	1	1	1	1	1	1	1
MB-5417	3	3	3	3	3	3	3	3	3	3	3	3	3	3	3	2	5	3	5	3	3	3	3	3	3
MB-5481	2	2	2	2	2	2	2	2	2	1	2	2	2	2	2	2	2	2	1	2	1	2	2	1	2
MB-5409	3	3	3	3	3	3	3	3	3	3	3	3	3	3	3	3	1	3	3	3	3	3	3	3	3
MB-5413	1	1	1	1	1	1	1	1	1	1	1	1	1	1	1	1	1	1	1	1	1	1	1	1	1
MB-5299	5	5	5	5	5	5	5	5	5	5	5	5	5	5	5	5	5	5	5	5	5	5	5	5	5
MB-5408	INC	4	4	4	4	4	4	3	1	1	3	3	4	1	4	1	1	3	3	4	3	4	1	5	3
MB-5475	1	1	1	1	2	2	2	2	2	1	1	1	2	1	2	1	1	2	1	1	1	2	1	1	2
MB-5505	2	2	2	2	2	2	2	2	1	1	2	2	2	2	2	2	2	2	2	2	2	2	2	2	2
MB-5100	5	5	5	5	5	5	5	5	5	5	5	5	5	5	5	5	5	5	5	5	5	5	5	5	5
MB-5325	5	5	5	5	5	5	5	5	5	5	5	5	5	5	5	5	1	5	5	5	5	5	5	5	5
MB-5502	2	2	2	2	2	2	2	2	2	2	2	2	2	2	2	2	2	2	2	2	2	2	2	2	2
MB-5485	2	2	2	2	2	2	2	2	2	2	2	2	2	2	2	2	2	1	2	2	1	2	2	2	1
MB-4293	1	1	1	1	1	1	1	1	1	1	1	1	1	1	1	1	1	1	1	1	1	1	1	1	1
MB-4289	2	2	2	2	3	2	3	2	1	1	3	2	2	3	3	2	2	3	3	2	2	2	2	3	2
MB-5293	1	1	2	2	1	1	1	1	2	1	1	2	1	1	1	1	1	3	1	2	1	1	1	1	2
MB-5381	3	3	3	3	3	3	3	3	3	3	5	3	3	3	3	3	3	3	3	3	3	3	3	3	3
MB-4834	2	2	2	2	2	2	2	2	2	2	2	2	2	2	2	2	2	2	2	2	2	2	2	2	2
MB-5498	INC	3	3	3	1	3	3	3	3	1	3	1	1	3	5	1	1	2	1	3	1	3	3	1	1
MB-4749	1	2	2	2	1	1	1	1	2	1	1	1	1	1	1	1	2	1	2	2	2	1	1	1	2
MB-4818	1	1	1	1	2	2	2	2	2	1	2	1	1	1	2	1	1	2	1	1	2	2	1	1	1
MB-4805	1	1	1	1	1	1	1	1	1	1	1	1	1	1	1	1	1	1	1	1	1	1	1	1	1
MB-4809	5	5	5	5	5	5	5	5	5	5	5	5	5	5	1	5	5	5	5	5	5	5	5	5	5
MB-5418	2	2	2	2	2	2	2	2	2	2	2	2	2	2	2	2	2	2	2	2	2	2	2	2	2
MB-5441	3	1	3	3	3	3	3	3	4	1	1	3	1	3	3	1	1	3	3	3	1	3	1	1	1
MB-5424	1	1	1	1	1	1	1	1	1	1	1	1	1	1	1	1	1	1	1	1	1	1	1	1	1
MB-5296	3	3	3	3	5	3	3	3	3	3	3	3	5	3	1	3	4	1	3	3	3	3	3	3	5
MB-5446	3	3	3	3	5	4	4	3	3	3	3	3	3	3	4	4	3	4	4	3	3	4	3	4	3
MB-5137	5	5	5	5	5	5	5	5	5	5	5	5	5	5	5	5	5	5	5	5	5	5	5	5	5
MB-5219	1	1	1	1	1	1	1	1	1	1	1	1	1	1	1	1	1	1	1	1	1	1	1	1	1
MB-5093	INC	2	2	2	1	2	2	2	1	2	1	1	1	1	1	1	1	2	2	2	4	1	2	3	1
MB-5350	2	3	2	2	2	2	5	2	3	2	2	2	1	2	2	2	1	2	4	2	2	5	3	5	2
MB-5230	1	1	1	1	1	1	1	1	1	1	1	1	1	1	1	1	1	1	1	1	1	1	1	1	1
MB-5206	1	1	1	1	1	1	1	1	1	1	1	1	1	1	1	1	1	1	1	1	1	1	1	1	1
MB-4687	1	2	2	2	1	1	1	1	1	3	1	1	1	1	1	1	1	1	1	2	1	1	1	1	1
MB-5433	1	1	2	1	1	1	1	1	1	1	4	1	1	1	1	1	2	1	1	2	1	1	1	1	1
MB-5442	5	5	5	5	5	5	5	5	5	5	5	5	5	5	5	5	1	5	5	5	5	5	5	5	5
MB-5427	5	5	5	5	5	5	5	5	5	5	5	5	5	5	5	5	5	5	5	5	5	5	5	4	5
MB-5491	1	1	2	2	1	2	2	1	1	1	1	1	1	2	1	1	2	1	1	2	1	1	2	2	2
MB-5493	2	2	2	2	2	2	2	2	2	2	2	2	2	2	2	2	2	2	2	2	2	2	2	1	2
MB-5451	1	1	1	1	1	1	1	1	1	1	1	1	1	1	1	1	1	1	1	1	1	1	1	1	1
MB-5454	2	2	2	2	3	2	2	2	3	5	2	2	2	2	3	2	1	2	2	2	2	2	2	2	2
MB-5360	1	1	1	1	1	1	1	1	1	1	1	1	1	1	1	1	1	1	1	1	1	1	1	1	1
MB-5229	3	3	3	3	5	4	4	4	3	1	3	3	3	1	3	3	3	3	3	3	3	3	1	3	3
MB-4827	1	1	1	1	1	1	1	1	1	1	1	1	1	1	1	1	1	1	1	1	1	1	1	1	1
MB-5455	1	1	1	1	1	1	1	1	1	1	1	1	1	1	1	1	1	1	1	1	4	1	1	1	1
MB-5349	1	1	1	1	1	1	1	1	1	1	1	1	1	1	1	1	1	1	1	1	1	1	1	1	1
MB-5370	2	2	2	2	2	2	2	2	2	2	2	2	2	2	2	2	1	2	2	2	2	2	2	2	2
MB-5290	1	1	1	1	1	1	1	1	1	1	1	1	1	1	1	1	1	1	1	1	1	1	1	1	1
MB-5366	INC	3	3	3	2	2	2	3	1	2	3	2	3	2	3	2	2	2	3	3	2	3	2	3	1
MB-5382	1	1	1	1	1	1	1	1	1	1	2	1	1	1	1	1	1	2	1	1	1	1	1	1	2
MB-5402	1	1	1	1	1	1	1	1	1	1	1	1	1	1	1	1	1	1	1	1	1	1	1	1	2
MB-5288	2	2	2	2	2	2	2	2	2	1	2	2	2	2	2	2	2	2	2	2	2	2	2	2	1
MB-5384	1	2	1	1	1	1	1	1	1	1	1	1	2	1	1	1	1	1	1	1	1	1	4	1	4
MB-5358	1	1	1	1	1	1	1	1	1	1	1	1	1	1	1	1	1	1	1	1	1	1	1	1	1
MB-4357	1	2	3	1	1	1	3	3	3	1	2	2	1	1	3	1	1	1	4	1	1	3	1	1	2
MB-4991	2	2	2	2	2	2	2	2	2	2	2	2	2	2	2	2	2	2	2	2	2	2	2	2	2
MB-5401	1	1	1	1	1	1	1	1	1	1	1	1	1	1	1	1	1	1	1	1	1	1	1	1	1
MB-5387	5	5	5	5	5	5	5	5	5	5	5	5	5	5	5	5	5	5	5	5	5	5	5	5	5
MB-5390	5	5	5	5	5	5	5	5	5	5	5	5	5	5	5	5	5	5	5	5	5	5	5	5	5
MB-5412	1	1	1	1	1	1	1	1	1	1	1	1	1	1	1	1	1	1	1	1	1	1	1	1	1
MB-5193	1	1	1	1	1	2	1	1	1	1	1	1	1	1	1	2	2	1	1	1	2	1	2	1	2
MB-5182	1	1	1	1	1	1	1	1	1	1	1	1	1	1	1	1	1	1	1	1	1	1	1	1	1
MB-5157	3	3	3	3	1	3	3	3	3	3	3	3	5	3	3	3	5	1	3	3	5	3	3	1	5
MB-5205	5	5	5	5	5	5	5	5	5	5	5	5	5	5	5	5	5	5	5	5	5	5	5	5	5
MB-5161	4	4	4	4	4	4	4	4	1	1	1	4	4	4	4	4	4	4	4	4	4	4	4	4	4
MB-5292	2	2	2	2	2	2	2	2	2	2	2	2	2	2	2	2	2	2	2	2	2	2	2	2	2
MB-5211	2	2	2	2	2	2	2	2	2	2	2	2	2	2	2	2	2	2	2	2	2	2	2	2	2
MB-5218	2	2	2	2	2	2	2	2	2	2	2	2	2	2	2	2	2	2	2	2	2	2	2	2	2
MB-5209	5	5	5	5	3	3	5	3	5	3	5	5	5	5	3	5	1	5	5	5	5	3	5	3	5
MB-5227	1	2	1	1	1	1	1	1	1	1	1	1	2	1	1	1	1	1	1	1	1	1	2	1	2
MB-5213	3	3	3	3	5	3	3	3	3	3	3	3	3	3	3	3	5	3	3	3	3	5	3	3	3
MB-5166	2	2	2	2	2	2	2	2	2	2	2	2	2	2	2	2	2	2	2	2	2	2	2	2	1
MB-5163	1	1	1	1	1	1	1	1	1	1	1	1	1	1	1	1	1	2	2	1	1	1	1	1	1
MB-5188	5	5	5	5	5	5	5	5	5	5	3	5	5	5	5	5	5	2	5	5	4	5	3	4	5
MB-5143	1	1	1	1	1	1	1	1	1	1	1	1	1	1	1	1	1	1	1	1	1	1	1	1	1
MB-5329	1	3	3	3	1	1	1	1	3	1	1	1	3	1	1	1	1	3	1	3	1	1	1	3	2
MB-5322	1	2	2	2	1	1	1	1	1	1	1	1	1	1	1	1	1	1	1	2	2	1	1	1	2
MB-5310	1	1	2	2	1	1	1	1	1	1	1	1	1	1	1	1	1	1	1	2	1	1	1	1	1
MB-4000	1	1	1	1	1	1	1	1	1	1	1	1	1	1	1	1	1	1	1	1	1	1	1	1	1
MB-5240	1	1	1	1	1	1	1	1	1	1	1	1	1	1	1	1	1	1	1	1	1	1	1	1	1
MB-5228	2	2	2	2	2	2	1	1	1	1	2	2	2	2	1	2	2	2	2	2	2	1	2	1	2
MB-5136	1	1	1	1	1	1	1	1	1	1	1	1	1	1	1	1	1	1	1	1	1	1	1	1	1
MB-5140	2	2	2	2	2	2	2	2	2	2	2	2	2	2	2	2	1	2	2	2	2	2	2	2	2
MB-5106	2	2	2	2	1	2	2	2	1	2	2	2	2	2	2	2	2	1	2	2	1	2	2	2	2
MB-5117	1	2	1	1	1	1	1	1	1	1	1	1	1	1	1	1	1	1	1	1	1	1	1	1	1
MB-5104	1	1	1	1	1	1	1	1	1	1	1	1	1	1	1	1	1	1	1	1	1	1	1	1	1
MB-5131	1	1	1	1	1	1	1	1	1	1	1	1	1	1	1	1	1	1	1	1	1	1	1	1	1
MB-5109	1	4	4	1	1	1	1	1	1	1	1	4	1	1	1	1	1	4	1	4	4	1	1	1	1
MB-5176	2	2	2	2	1	2	2	2	1	1	2	1	2	2	2	2	2	2	1	2	1	2	2	1	1
MB-5158	1	1	1	1	1	1	1	1	1	1	1	1	1	1	1	1	1	1	1	1	1	1	1	1	1
MB-5076	5	5	5	5	4	5	5	5	5	5	5	5	5	5	5	5	5	5	5	5	5	5	5	4	5
MB-5215	2	2	2	2	2	1	1	2	2	2	1	1	1	2	2	1	1	2	1	2	1	1	2	1	2
MB-5223	5	4	5	5	5	5	5	5	5	5	5	5	5	4	5	4	3	4	5	5	5	5	4	5	4
MB-5179	1	1	1	1	4	1	1	1	1	1	1	1	1	1	1	1	1	1	1	1	1	1	1	1	1
MB-5330	1	1	1	1	1	1	1	1	1	1	1	1	1	1	1	1	1	1	1	1	1	1	1	1	1
MB-5144	2	2	2	2	2	2	2	2	1	1	1	1	2	2	2	2	1	1	2	2	3	2	2	1	2
MB-5196	2	2	2	2	1	1	1	1	2	1	2	2	2	2	1	2	1	2	2	2	2	1	2	2	1
MB-5200	2	2	2	2	2	2	2	2	2	2	2	2	2	2	2	2	2	2	2	2	2	2	2	2	2
MB-5583	1	1	1	1	1	1	1	1	1	1	1	1	1	1	1	1	1	1	1	1	1	1	1	1	1
MB-5601	1	1	1	1	1	1	1	1	1	1	1	1	1	1	1	1	1	1	1	1	1	1	1	1	1
MB-5632	2	2	2	2	2	2	2	2	2	2	2	2	2	2	2	2	1	1	2	2	2	2	2	2	2
MB-5616	5	5	5	5	5	5	5	5	5	5	5	5	5	5	5	5	5	5	5	5	5	5	5	5	5
MB-5604	2	2	2	2	2	2	2	2	2	2	2	2	2	2	2	2	2	2	2	2	2	2	2	2	2
MB-5589	1	1	1	1	1	1	1	1	1	1	1	1	1	1	1	1	1	1	1	1	1	1	1	1	1
MB-5582	1	1	1	1	1	1	1	1	1	1	1	1	1	1	1	1	1	1	1	1	1	1	1	1	1
MB-5625	5	5	5	5	5	5	5	5	5	5	5	5	5	5	5	5	5	5	5	5	5	5	5	5	5
MB-5571	1	1	1	1	1	1	1	1	1	1	1	1	1	1	1	1	1	1	1	1	1	1	1	1	1
MB-5596	1	1	1	1	1	1	1	1	1	1	1	1	1	1	1	1	1	1	1	1	1	1	1	1	1
MB-5590	2	2	2	2	2	2	2	2	2	2	2	2	2	2	2	2	1	2	2	2	1	2	2	2	2
MB-5599	1	1	1	1	1	1	1	1	1	2	1	1	1	1	1	1	1	1	1	1	1	1	1	1	1
MB-5629	1	2	2	2	2	1	1	1	2	1	4	1	1	2	1	1	1	2	2	2	1	1	1	4	1
MB-5579	1	1	1	1	1	1	1	1	1	1	1	1	1	1	1	1	1	1	1	1	1	1	1	1	1
MB-5623	2	2	2	2	2	1	1	1	1	1	2	2	2	2	1	2	2	2	2	2	2	1	2	1	2
MB-5654	2	1	1	1	2	2	2	1	2	2	2	1	1	2	1	2	1	2	2	1	2	2	2	2	1
MB-5617	1	1	1	1	1	1	1	1	1	1	1	1	1	1	1	1	1	1	1	1	1	1	1	1	1
MB-5638	1	1	1	1	1	1	1	1	1	1	1	1	1	1	1	1	2	1	4	1	1	1	1	2	2
MB-5635	1	1	1	1	1	1	1	1	2	1	1	1	1	1	1	1	1	1	3	1	2	1	1	1	2
MB-5642	1	1	1	1	1	1	1	1	1	1	1	1	1	1	1	1	1	1	1	1	1	1	1	1	1
MB-5647	1	1	1	1	1	1	1	1	1	1	2	1	1	1	1	1	1	1	1	1	1	1	1	2	1
MB-4018	1	1	1	1	1	1	1	1	1	1	2	1	1	1	1	1	1	1	1	1	1	1	1	1	1
MB-5584	2	3	3	3	3	3	3	2	2	1	3	2	2	2	3	2	2	2	2	3	2	3	2	2	2
MB-5626	1	1	1	1	1	1	1	1	1	1	1	1	1	1	1	1	1	1	1	1	1	1	1	1	1
MB-5602	3	5	3	3	3	3	3	3	5	3	3	3	3	5	3	3	1	5	3	3	5	3	3	5	5
MB-5653	1	2	1	1	1	2	1	1	2	1	2	2	1	2	2	1	2	1	2	1	1	2	1	1	2
MB-5576	2	2	2	2	2	2	2	2	2	2	2	2	2	2	2	2	1	2	2	2	2	2	2	2	2
MB-5575	2	2	2	2	2	2	2	2	2	2	2	2	2	2	2	2	1	2	2	2	2	2	2	2	2
MB-5646	2	1	2	2	1	2	2	2	2	2	2	1	2	1	2	2	1	1	2	2	2	1	1	1	1
MB-5634	5	5	5	5	5	5	5	5	5	5	5	5	5	5	5	5	1	5	5	5	5	5	5	5	5
MB-5591	1	1	1	1	1	1	1	1	2	2	1	1	1	1	1	2	1	2	2	1	2	1	2	1	1
MB-5567	1	1	1	1	1	1	1	1	1	1	1	1	1	1	1	1	1	1	2	1	1	1	1	1	1
MB-5651	5	5	5	5	5	5	5	5	5	5	3	5	5	5	5	4	5	4	5	5	5	5	5	5	3
MB-5603	1	1	1	1	1	1	1	1	1	1	1	1	1	1	1	1	1	1	1	1	1	1	1	1	1
MB-5622	2	2	2	2	2	2	2	2	2	2	2	2	1	2	2	2	1	2	1	2	2	2	2	1	1
MB-5597	1	1	1	1	1	1	1	1	1	1	1	1	1	1	1	1	1	1	1	1	1	1	1	1	1
MB-5613	2	2	2	2	2	2	2	2	2	2	2	2	2	2	2	2	2	2	2	2	2	2	2	2	2
MB-5580	1	1	1	1	1	1	1	1	1	1	1	1	1	1	1	1	1	1	1	1	1	1	1	1	1
MB-5645	1	1	1	1	1	1	1	1	1	1	1	1	1	1	1	1	1	1	1	1	1	1	1	1	1
MB-5548	5	5	5	5	5	5	5	5	5	5	5	5	5	5	5	5	5	5	5	5	5	5	5	5	5
MB-5526	5	5	5	5	5	5	5	5	5	5	5	5	5	5	5	5	5	5	5	5	5	5	5	5	5
MB-5531	5	5	5	5	5	5	5	5	5	5	5	5	5	5	5	5	5	5	5	5	5	5	5	5	5
MB-5468	5	5	5	5	5	5	5	5	5	5	5	5	5	5	5	5	5	3	5	5	5	5	5	3	5
MB-5474	3	3	3	3	5	3	3	3	5	3	5	5	3	3	1	5	2	3	3	3	5	5	5	5	3
MB-5514	1	1	1	1	1	1	1	1	1	1	1	1	1	1	1	1	1	1	1	1	1	1	1	1	1
MB-5302	INC	4	4	4	5	4	4	1	1	1	1	1	2	4	1	1	1	1	4	4	2	4	2	1	1
MB-5510	1	1	1	1	1	1	1	1	1	1	1	1	1	1	1	1	1	1	1	1	1	1	1	1	1
MB-5473	1	1	1	1	1	1	1	1	1	1	1	1	1	1	1	1	1	1	1	1	1	1	1	1	1
MB-5484	1	1	1	1	1	1	1	1	1	1	1	1	1	1	1	1	1	1	1	1	1	1	1	1	1
MB-5432	1	1	1	1	1	1	1	1	1	1	1	1	1	1	1	1	1	1	1	1	1	1	1	1	1
MB-5525	2	2	2	2	1	1	2	2	3	2	2	2	2	2	2	2	2	2	2	2	2	2	2	2	2
MB-5562	2	2	2	2	2	2	2	1	1	1	2	2	2	1	2	2	2	2	2	2	1	2	2	2	1
MB-5497	2	2	2	2	2	2	2	2	2	1	2	2	2	2	2	2	2	2	2	2	2	2	2	2	2
MB-5551	5	5	5	5	5	5	5	5	5	5	5	5	5	5	5	5	5	5	5	5	5	5	5	5	5
MB-5300	1	1	1	1	1	1	1	1	1	1	1	1	1	1	1	1	1	1	1	1	1	1	1	1	1
MB-5560	5	5	5	5	5	5	5	5	5	5	5	5	5	5	5	5	5	5	5	5	5	5	5	5	5
MB-5550	1	1	1	1	1	1	1	1	2	1	1	1	1	1	2	1	1	1	1	1	1	1	1	1	1
MB-5520	1	2	3	3	1	1	1	1	1	1	1	1	2	1	1	2	1	1	1	3	1	1	1	1	1
MB-5529	5	5	5	5	5	5	5	5	5	5	5	5	5	5	5	5	1	5	5	5	5	5	5	5	5
MB-5554	1	1	1	1	1	1	1	1	1	1	1	1	1	2	2	1	2	1	1	1	2	1	1	1	1
MB-5301	3	1	3	3	3	3	1	3	3	1	3	3	3	1	3	1	1	3	3	3	3	3	1	1	1
MB-4421	1	1	1	1	1	1	1	1	1	2	1	1	1	1	1	1	1	2	1	1	1	1	1	2	1
MB-4408	5	5	5	5	5	5	5	5	5	2	5	5	5	5	5	5	1	3	5	5	5	5	5	3	5
MB-4146	5	5	5	5	5	5	5	5	5	5	5	4	5	5	5	5	5	4	5	5	4	5	5	3	4
MB-5534	2	2	2	2	2	2	2	2	2	2	2	2	2	2	2	2	1	2	2	2	2	2	2	2	2
MB-5521	2	1	2	2	4	2	2	2	2	2	2	1	2	2	1	2	1	2	1	2	2	2	2	2	2
MB-5482	5	5	5	5	5	5	5	5	5	5	5	5	5	5	5	5	5	5	5	5	5	5	5	5	5
MB-5483	3	3	3	3	2	3	3	3	2	2	3	3	3	2	1	3	3	5	3	3	1	2	3	3	3
MB-5532	INC	2	2	2	1	1	1	1	1	1	1	1	2	2	1	1	2	2	1	2	2	1	2	2	2
MB-5556	2	2	2	2	2	2	2	2	2	2	1	2	2	2	2	2	2	2	2	2	1	2	2	2	1
MB-5518	2	2	2	2	2	2	2	2	2	2	2	2	2	2	2	2	1	2	2	2	2	2	2	2	2
MB-5486	2	2	2	2	2	2	2	2	2	2	2	2	2	2	2	2	2	1	2	2	2	2	2	1	2
MB-5511	3	3	3	3	3	3	3	3	3	2	3	3	3	3	1	3	1	1	1	3	3	3	1	3	3
MB-5422	1	1	1	1	1	1	1	1	1	1	1	1	1	1	1	1	2	1	1	1	1	1	1	1	2
MB-5535	3	3	3	3	3	3	3	3	3	3	3	3	3	3	3	3	3	1	3	3	3	3	3	3	3
MB-5477	2	2	2	2	2	2	2	2	2	2	2	2	2	2	2	2	2	2	2	2	2	2	2	2	2
MB-5472	1	1	1	1	1	1	1	1	1	1	1	1	1	1	1	1	1	1	1	1	1	1	1	1	1
MB-5540	2	2	2	2	2	2	2	2	2	2	2	2	2	2	2	2	2	2	2	2	2	2	2	2	2
MB-5184	1	1	1	1	1	1	1	1	1	1	4	1	1	1	1	1	1	1	1	1	4	1	1	1	1
MB-5294	5	5	5	5	5	5	5	5	5	5	5	5	5	5	5	5	5	5	5	5	5	5	5	5	5
MB-5565	5	5	5	5	5	5	5	5	5	5	5	5	5	5	5	5	5	5	5	5	5	5	5	5	5
MB-5040	2	2	2	2	2	2	2	2	2	2	2	2	2	2	2	2	2	2	2	2	2	2	2	1	2
MB-4801	1	1	1	1	1	1	1	1	2	2	1	1	1	1	1	1	1	1	1	1	1	1	1	1	1
MB-5499	1	1	1	1	1	1	1	1	1	1	1	1	1	1	1	1	1	4	1	1	1	1	1	1	1
MB-5459	2	2	2	2	2	2	2	2	2	2	2	2	2	2	2	2	2	2	2	2	2	2	2	3	2
MB-5243	2	2	2	2	2	2	2	2	2	2	1	1	2	2	2	1	2	2	1	2	2	2	1	2	1
MB-4120	1	1	2	2	1	1	1	1	1	1	1	2	1	1	1	1	1	1	1	2	1	1	1	2	1
MB-4966	1	1	1	1	2	1	1	1	1	1	1	1	1	1	1	1	1	2	1	1	2	1	1	3	1
MB-5457	1	1	1	1	1	1	1	1	1	1	1	1	1	1	1	1	1	1	1	1	1	1	1	1	1
MB-4011	1	1	1	1	1	2	2	2	2	1	1	1	1	1	1	1	1	2	2	1	1	1	1	2	1
MB-5478	1	1	1	1	1	1	1	1	1	1	1	1	1	1	1	1	1	1	1	1	1	1	1	1	1
MB-4822	1	1	1	1	1	1	1	1	1	1	1	1	1	1	1	1	1	1	1	1	1	1	1	1	1
MB-4017	2	2	2	2	2	2	2	2	2	2	2	2	2	2	2	2	2	2	2	2	2	2	2	2	2
MB-5018	1	2	1	1	1	1	1	1	1	1	1	1	1	1	1	1	1	2	2	1	1	1	1	1	1
MB-4791	2	2	2	2	2	2	2	2	2	2	2	2	2	2	2	2	2	1	1	2	2	2	2	2	1
MB-5118	1	1	1	1	1	1	1	1	1	1	1	1	1	1	1	1	1	1	1	1	1	1	1	1	1
MB-4806	1	1	1	1	1	1	1	1	1	1	1	1	1	1	1	1	1	1	1	1	1	1	1	1	1
MB-4970	2	2	2	2	2	2	2	1	1	2	1	2	2	2	2	2	1	2	2	2	2	2	2	1	1
MB-2964	INC	3	3	3	1	3	3	3	1	2	3	1	1	1	1	1	1	1	3	3	1	3	3	1	1
MB-2963	INC	1	4	4	2	3	2	2	3	1	4	4	3	5	1	1	1	1	5	4	5	3	1	1	3
MB-2957	5	5	5	5	5	5	5	5	5	5	5	5	5	5	5	5	5	5	5	5	5	5	5	5	5
MB-2954	2	2	2	2	2	2	2	2	2	1	2	1	2	2	2	2	1	2	2	2	2	2	1	2	1
MB-2916	1	1	1	1	1	1	1	1	1	1	1	1	1	1	1	1	1	1	1	1	1	1	1	1	1
MB-2725	1	4	4	4	1	1	1	1	1	1	1	1	1	4	1	1	1	1	1	1	1	1	1	4	1
MB-2711	1	1	1	1	1	1	1	1	1	1	1	1	1	1	1	1	1	1	1	1	1	1	1	1	1
MB-2730	2	2	2	2	2	2	2	2	2	2	1	2	2	2	2	2	2	2	2	2	2	2	2	2	2
MB-2669	1	1	1	1	1	1	1	1	1	1	1	1	1	1	1	1	1	1	1	1	1	1	1	4	1
MB-2705	2	2	2	2	2	2	2	2	2	1	2	2	2	2	2	2	2	2	2	2	1	2	2	2	2
MB-2728	2	2	2	2	2	2	2	2	2	2	2	2	2	2	2	2	1	2	2	2	2	2	2	2	2
MB-2708	2	2	2	2	2	2	2	2	1	2	2	2	2	2	2	2	2	2	2	2	2	2	2	1	2
MB-2735	2	2	2	2	2	2	2	2	2	2	2	2	2	2	1	2	2	2	2	2	2	2	2	2	2
MB-3035	1	1	1	1	1	1	1	1	1	1	1	1	1	1	1	1	1	1	1	1	1	1	1	1	1
MB-3064	1	1	1	1	1	1	1	1	1	1	1	1	1	1	1	1	1	1	1	1	1	1	1	1	1
MB-3060	2	2	2	2	2	2	2	2	2	2	2	2	2	2	2	2	2	2	2	2	2	2	2	2	2
MB-3049	1	1	1	1	4	1	1	1	1	1	1	1	1	1	1	1	1	1	1	1	1	1	1	1	1
MB-3037	1	1	1	1	1	1	1	1	1	1	1	1	1	1	1	1	1	1	1	1	1	1	1	1	2
MB-3063	5	5	5	5	5	5	5	5	5	5	5	5	5	5	5	5	5	5	5	5	5	5	5	5	5
MB-3083	2	2	2	2	2	2	2	2	2	2	2	2	2	2	2	2	2	2	2	2	2	2	2	2	2
MB-3046	5	5	5	5	5	5	5	5	5	5	5	5	5	5	5	5	4	5	5	5	5	5	5	5	5
MB-3067	5	5	5	5	5	5	5	5	5	5	5	5	5	5	5	5	5	5	5	5	5	5	5	5	5
MB-3351	1	1	1	1	1	1	1	1	1	1	1	1	1	1	1	1	1	1	1	1	1	1	1	1	1
MB-3367	5	5	5	5	4	5	5	5	5	5	5	5	5	5	4	5	5	5	5	5	5	5	5	5	5
MB-3361	2	2	2	2	2	2	2	2	2	2	2	2	2	2	2	2	2	2	2	2	2	2	2	2	2
MB-3412	1	1	1	1	1	1	1	1	1	1	1	1	1	1	1	1	1	1	1	1	1	1	1	1	1
MB-3371	2	2	2	2	2	2	2	2	2	2	2	2	1	2	2	1	1	2	1	2	2	2	2	2	2
MB-3429	4	4	4	4	1	4	4	4	4	1	4	4	4	4	1	4	4	4	4	4	4	4	4	1	4
MB-3360	2	2	2	2	2	2	2	2	2	2	2	2	2	2	2	2	1	2	2	2	2	2	2	2	2
MB-3403	1	1	1	1	1	1	1	1	1	1	1	1	1	2	1	1	1	1	1	1	1	1	1	1	2
MB-3350	2	1	2	2	2	2	2	2	2	2	2	1	2	2	2	2	1	2	2	2	1	2	2	1	1
MB-3355	3	3	3	3	3	3	3	3	3	3	3	3	3	3	3	3	1	3	3	3	3	3	3	3	3
MB-3329	3	3	3	3	2	3	3	3	3	2	5	3	3	1	3	3	3	5	3	3	5	3	3	3	3
MB-3467	3	3	3	3	3	3	3	3	3	3	3	3	3	3	3	3	3	3	3	3	3	3	3	5	3
MB-3341	1	1	1	1	1	1	1	1	1	1	1	1	1	1	1	1	1	1	1	1	1	1	1	1	1
MB-3298	1	1	1	1	1	1	1	1	1	1	1	1	1	1	1	1	1	1	1	1	1	1	1	1	1
MB-3357	2	2	2	2	2	2	2	2	2	2	2	2	2	2	2	2	2	2	2	2	2	2	2	2	2
MB-3388	2	2	2	2	2	2	2	2	2	2	2	2	2	2	2	2	2	2	2	2	2	2	2	2	2
MB-3365	1	1	1	1	1	1	1	1	1	1	1	1	1	1	1	1	1	1	1	1	1	1	1	1	1
MB-2749	1	1	1	1	1	1	1	1	1	1	1	1	1	1	1	1	1	4	1	1	1	1	1	1	1
MB-2754	INC	4	4	4	4	4	4	4	1	1	3	3	1	1	1	4	4	4	5	4	4	1	3	3	3
MB-2752	1	1	1	1	1	1	1	1	1	1	1	1	1	1	1	1	1	1	1	1	1	1	1	1	1
MB-2745	1	2	2	2	1	1	1	1	1	1	1	1	1	1	1	1	2	1	1	2	1	1	1	2	1
MB-2747	1	1	1	1	1	1	1	1	1	1	2	1	1	2	1	1	1	1	2	1	1	1	1	2	2
MB-2760	1	1	1	1	2	2	1	1	2	2	2	1	2	1	2	1	1	1	2	1	1	1	1	1	1
MB-2742	3	3	3	3	3	3	3	3	3	3	5	3	5	5	3	3	5	3	5	3	3	5	5	5	3
MB-2750	1	1	1	1	1	1	1	1	1	1	1	1	1	1	1	1	1	1	1	1	1	1	1	1	1
MB-2753	5	5	5	5	5	5	5	5	5	5	5	5	5	5	5	5	5	5	5	5	5	5	5	5	5
MB-2966	1	2	1	1	1	2	1	1	1	1	1	1	1	2	1	1	1	1	1	1	1	2	1	1	2
MB-2953	2	2	2	2	2	2	2	2	2	2	1	2	2	3	2	2	2	2	2	2	2	2	2	3	2
MB-2969	1	1	1	1	1	1	1	1	1	1	1	1	1	1	1	1	1	1	1	1	2	1	1	1	1
MB-3014	5	5	5	5	5	5	5	5	5	5	5	5	5	5	5	5	5	5	5	5	5	5	5	5	5
MB-2947	1	1	1	1	1	1	1	1	1	1	1	1	1	1	1	1	1	1	1	1	1	1	1	1	1
MB-2951	1	1	1	1	1	1	1	1	1	1	1	1	1	1	1	1	1	1	1	1	1	1	1	1	1
MB-2960	1	1	1	1	1	1	1	1	2	1	2	2	2	1	1	1	1	1	2	1	2	1	1	2	2
MB-2970	1	1	1	1	1	1	1	1	1	1	1	1	1	1	1	1	1	1	1	1	1	1	1	1	1
MB-2971	1	1	1	1	1	1	1	1	1	1	1	1	1	1	1	1	1	1	1	1	1	1	1	1	1
MB-2933	1	1	1	1	1	1	1	1	1	1	1	1	1	1	1	1	1	1	1	1	1	1	1	1	1
MB-3479	4	4	4	4	4	4	4	4	4	4	4	4	4	4	4	4	4	4	4	4	4	4	4	4	4
MB-3490	2	2	2	2	2	2	2	2	1	2	2	2	2	2	2	2	2	2	2	2	2	2	2	2	2
MB-3487	2	2	2	2	2	2	2	2	2	2	2	2	2	2	2	2	2	2	2	2	2	2	2	2	2
MB-3459	2	2	2	2	2	2	2	2	2	2	2	2	2	2	2	1	2	2	2	2	2	2	2	2	2
MB-3476	5	5	5	5	5	5	5	5	5	5	5	5	5	5	5	5	3	5	5	5	5	5	5	5	5
MB-3492	2	2	2	2	2	2	2	2	1	2	1	2	1	2	2	2	1	1	2	2	2	2	1	2	2
MB-3452	4	4	4	4	4	4	4	4	3	1	4	4	1	1	4	4	4	4	5	4	4	4	1	1	1
MB-3303	2	2	2	2	2	2	2	2	2	2	2	2	2	2	2	2	2	2	2	2	2	2	2	2	2
MB-3328	1	1	1	1	1	1	1	1	1	1	1	1	1	1	1	1	1	1	1	1	1	1	1	2	1
MB-3300	2	1	1	1	2	2	2	2	2	1	1	2	2	1	2	2	1	1	2	1	2	2	2	2	2
MB-3277	5	5	5	5	5	5	5	5	5	5	5	5	5	5	5	5	5	5	5	5	5	5	5	5	5
MB-3254	1	1	1	1	1	1	1	1	1	1	1	1	1	1	1	1	1	1	1	1	1	1	1	1	1
MB-3275	2	2	2	2	2	2	2	2	2	2	2	2	2	2	2	2	2	2	2	2	2	2	2	2	2
MB-3272	2	2	2	2	1	2	2	2	1	2	2	2	1	2	2	2	2	3	2	2	2	2	2	1	2
MB-3271	5	5	5	5	5	5	5	5	5	5	5	5	5	5	5	5	5	5	5	5	5	5	5	5	5
MB-3292	5	5	5	5	5	5	5	5	5	5	5	5	5	5	5	5	5	5	5	5	5	5	5	5	5
MB-3840	2	1	2	2	2	2	2	2	2	2	2	2	2	2	2	2	2	2	2	2	2	2	2	2	2
MB-2536	1	1	1	1	1	1	1	1	1	1	1	1	1	1	1	1	1	1	1	1	1	1	1	1	1
MB-2564	1	1	1	1	1	1	1	1	1	1	1	1	1	1	1	1	1	1	1	1	1	1	1	1	1
MB-2513	3	3	3	3	3	3	3	3	4	1	3	3	3	3	3	3	1	3	3	3	3	3	3	1	3
MB-2617	2	2	2	2	2	2	2	2	2	1	2	2	2	2	2	2	2	2	3	2	2	2	2	1	2
MB-2614	1	1	1	1	1	1	1	1	1	1	1	1	1	1	1	1	1	1	1	1	1	1	1	1	1
MB-2632	3	3	3	3	3	3	3	3	3	3	3	3	3	3	3	3	5	3	3	3	5	3	3	3	3
MB-2556	4	4	4	4	4	4	4	4	4	4	4	4	4	4	5	4	4	4	4	4	4	4	4	1	4
MB-2624	1	1	1	1	1	1	1	1	1	1	4	1	1	1	1	1	1	1	1	1	4	1	1	1	1
MB-2867	1	1	1	1	1	1	1	1	1	1	1	1	1	1	1	1	1	1	4	1	1	1	1	1	1
MB-2922	3	3	3	3	3	3	3	3	3	3	3	3	3	3	3	3	2	3	3	3	3	3	3	3	3
MB-2917	5	5	5	5	5	5	5	5	5	5	5	5	5	5	5	5	3	5	5	5	5	5	5	5	5
MB-2858	2	2	2	2	2	2	2	2	2	1	2	2	2	2	2	2	2	2	2	2	2	2	2	2	2
MB-2854	1	1	1	1	1	1	1	1	1	1	1	1	1	1	1	1	1	1	1	1	1	1	1	4	1
MB-2853	2	1	2	2	2	2	2	2	1	1	2	1	1	1	2	1	1	2	2	2	2	2	2	3	1
MB-3235	2	2	3	2	2	2	2	2	2	2	2	2	2	2	2	2	3	2	2	3	2	2	2	2	2
MB-3165	INC	5	5	5	3	5	3	3	3	2	5	3	3	3	2	5	5	3	3	5	5	3	5	3	3
MB-3171	1	1	1	1	1	1	1	1	1	1	1	1	1	1	1	1	1	1	1	1	1	1	1	1	1
MB-3167	1	1	1	1	1	1	2	1	1	1	1	1	1	1	1	2	1	2	1	1	1	2	1	2	1
MB-3222	1	1	1	1	1	1	1	1	1	1	1	1	1	1	1	1	1	1	1	1	1	1	1	1	1
MB-3706	5	5	5	5	5	5	5	5	5	5	5	5	5	5	5	5	5	4	5	5	5	5	5	5	5
MB-3497	3	3	3	3	3	3	3	3	3	1	3	3	3	3	3	3	3	3	3	3	3	3	3	4	3
MB-3488	3	3	3	3	1	3	3	3	3	1	3	3	4	3	1	3	3	2	3	3	3	1	3	3	3
MB-3711	1	1	1	1	1	1	1	1	1	1	1	1	1	1	1	1	1	1	1	1	1	1	1	1	1
MB-3548	2	2	2	1	2	2	1	1	1	2	2	2	1	2	1	2	1	2	2	2	1	1	2	2	2
MB-3506	2	2	2	2	2	2	2	2	2	2	3	2	2	2	2	2	2	2	2	2	2	2	2	2	2
MB-3525	2	2	2	2	2	2	2	2	2	2	2	2	2	2	2	2	2	2	2	2	2	2	2	2	2
MB-3606	3	3	3	3	3	3	3	3	3	3	3	3	3	3	3	3	3	3	3	3	3	3	3	3	3
MB-3453	4	4	4	4	4	4	4	4	4	4	5	5	1	4	3	5	5	4	3	4	3	4	1	5	3
MB-3545	1	4	4	4	4	1	1	1	1	1	1	1	1	1	1	1	1	1	1	4	1	1	1	1	1
MB-3470	3	3	3	3	3	3	3	3	1	1	5	3	3	3	3	3	3	3	3	3	4	3	3	3	3
MB-2765	1	1	1	1	1	1	1	1	1	1	1	1	1	1	1	1	1	1	1	1	2	1	1	2	1
MB-2763	1	1	1	1	2	2	2	2	2	1	2	2	1	1	2	1	1	1	1	1	1	1	1	1	2
MB-2767	2	2	2	2	3	2	2	2	2	2	2	2	2	2	2	2	2	2	2	2	2	2	2	5	2
MB-2790	1	1	1	1	1	1	1	1	1	1	1	1	1	1	1	1	2	2	1	1	1	1	1	1	1
MB-2769	2	2	2	2	2	2	2	2	2	2	2	2	2	2	2	2	2	2	2	2	1	2	2	2	2
MB-2842	5	5	5	5	5	5	5	5	5	5	5	5	5	5	5	5	5	5	5	5	5	5	5	5	5
MB-2772	2	2	2	2	2	2	2	2	2	2	2	2	2	2	2	2	1	2	2	2	2	2	2	1	2
MB-2779	1	2	2	2	1	1	1	1	1	2	1	1	1	1	1	1	2	1	1	2	4	1	1	4	1
MB-2774	2	2	2	2	2	1	1	1	2	2	1	2	2	1	1	2	2	1	1	2	2	2	1	2	2
MB-2983	2	2	2	2	2	2	2	2	2	2	2	2	2	2	2	2	2	2	2	2	2	2	2	2	2
MB-3005	1	1	1	1	1	1	1	1	1	1	1	1	1	1	1	1	1	2	1	1	1	1	1	1	1
MB-2977	1	1	1	1	1	1	1	1	1	1	1	1	1	1	1	1	1	1	1	1	1	1	1	1	1
MB-2996	1	1	1	1	1	2	1	1	1	1	1	1	1	1	1	1	1	2	2	1	2	1	1	1	2
MB-2999	1	2	2	2	1	1	1	1	1	1	2	2	1	1	1	2	2	2	1	2	2	1	1	1	1
MB-2994	1	2	2	2	1	1	1	1	2	1	2	1	1	1	1	2	2	1	1	2	2	1	1	1	1
MB-3025	3	3	3	3	2	3	3	3	3	3	3	3	3	3	3	3	3	3	3	3	4	3	3	2	3
MB-2984	2	2	2	2	2	2	2	2	2	2	2	2	2	2	2	2	2	2	2	2	2	2	2	2	2
MB-3002	1	2	1	1	1	1	1	1	1	4	2	1	2	1	2	1	2	1	1	1	4	1	1	1	1
MB-2845	1	4	4	4	1	1	1	1	1	1	4	1	1	1	1	1	1	4	1	4	4	1	1	1	4
MB-2912	5	5	5	5	5	5	5	5	5	5	5	5	5	5	5	5	5	5	5	5	5	5	5	5	5
MB-2844	2	2	2	2	2	2	2	2	2	2	2	2	2	2	2	2	2	3	2	2	2	2	2	2	2
MB-2847	3	3	3	3	3	3	3	3	3	3	3	3	3	3	3	3	2	3	3	3	3	3	3	3	3
MB-2849	5	5	5	5	5	5	4	5	5	5	3	5	5	5	5	5	3	3	5	5	5	5	3	4	3
MB-2851	1	1	1	1	1	1	1	1	1	1	1	1	1	1	1	1	1	1	1	1	4	1	1	4	1
MB-2848	1	1	1	1	1	1	1	1	1	1	1	1	1	1	1	1	1	1	1	1	1	1	1	1	1
MB-2863	1	1	1	1	1	1	1	1	1	1	1	1	1	1	1	1	1	1	1	1	1	1	1	1	1
MB-2840	1	1	1	1	1	1	1	1	1	1	1	1	1	1	1	1	1	1	1	1	1	1	1	1	1
MB-2843	1	1	1	1	1	1	1	1	1	1	1	1	1	1	1	1	1	1	1	1	1	1	1	2	1
MB-3013	1	1	1	1	1	1	1	1	1	1	1	1	1	1	1	1	1	1	1	4	1	1	1	1	1
MB-3058	5	5	5	5	5	5	5	5	5	4	5	5	5	5	5	5	3	4	5	5	5	5	5	5	5
MB-3016	2	2	2	2	2	2	2	2	2	2	2	2	2	2	2	2	2	1	2	2	2	2	2	2	2
MB-3057	5	5	5	5	5	5	5	5	5	5	5	5	5	5	5	5	5	5	5	5	5	5	5	5	5
MB-3008	1	1	1	1	1	1	1	1	1	1	1	1	1	1	1	1	1	1	1	1	1	1	1	1	1
MB-3021	1	2	1	2	1	1	1	1	1	2	1	2	1	2	1	2	1	2	3	2	1	1	1	3	4
MB-3032	1	1	1	1	1	1	1	1	1	1	1	1	1	1	1	1	1	1	4	1	1	1	1	1	1
MB-3007	2	2	2	2	1	1	1	2	2	2	2	2	2	2	1	1	2	2	1	2	1	1	2	2	1
MB-3033	1	1	1	1	1	1	1	1	1	1	1	1	1	1	1	1	1	1	1	1	1	1	1	1	1
MB-3026	1	1	1	1	1	1	1	1	1	1	1	1	1	1	1	1	1	1	2	1	1	1	1	1	1
MB-3006	4	4	4	4	4	4	4	4	4	1	4	1	4	4	4	1	1	4	4	4	4	4	1	1	4
MB-3439	1	1	1	1	1	1	1	1	1	1	1	1	1	1	1	1	1	1	1	1	1	1	1	1	1
MB-3437	2	2	1	1	2	2	2	2	2	2	1	1	1	1	2	2	1	1	1	1	1	2	2	2	2
MB-3395	5	5	5	5	5	5	5	5	5	5	5	5	5	5	5	5	5	5	5	5	5	5	5	5	5
MB-3386	3	3	3	3	3	3	3	3	3	2	3	3	3	3	3	3	3	3	3	3	3	3	3	3	3
MB-3382	2	2	2	2	2	2	2	2	2	2	2	2	2	2	2	2	2	2	2	2	2	2	2	2	2
MB-3379	1	1	1	1	1	1	1	1	1	1	1	1	1	1	1	1	1	1	1	1	1	1	1	1	1
MB-3430	1	2	1	1	1	1	1	1	1	1	1	1	1	1	1	1	1	1	1	1	1	1	1	2	1
MB-3389	2	2	2	2	2	2	2	2	2	2	2	2	2	2	2	2	2	2	2	2	2	2	2	2	2
MB-3378	1	1	1	1	1	1	1	1	1	1	1	1	1	1	1	1	1	1	1	1	1	1	1	1	1
MB-3110	1	1	1	1	1	1	1	1	1	1	1	1	1	1	1	1	1	1	1	1	1	1	1	1	1
MB-3079	1	1	1	1	1	1	1	1	1	1	1	1	1	1	1	1	1	1	1	1	1	1	1	1	1
MB-3103	2	2	2	2	1	2	2	2	2	2	2	2	1	2	2	2	1	1	2	2	2	2	2	1	1
MB-3102	1	1	1	1	2	2	2	2	2	2	1	1	1	1	2	1	1	1	1	1	1	2	1	1	2
MB-3085	4	4	4	4	4	4	4	4	4	1	4	1	4	4	4	4	1	4	4	4	4	4	1	1	1
MB-3122	2	3	3	3	2	2	2	2	2	2	4	2	2	2	2	2	2	2	2	3	2	2	2	2	2
MB-3104	1	2	1	1	1	1	1	1	1	1	1	1	1	1	1	1	2	1	1	1	1	1	1	5	1
MB-3123	5	5	5	5	5	5	5	5	5	5	5	5	5	5	5	5	5	5	5	5	5	5	5	5	5
MB-3121	1	1	1	1	1	1	1	1	1	1	1	1	1	1	1	1	1	1	1	1	1	1	1	1	1
MB-2835	1	1	1	1	1	1	1	1	1	1	4	1	1	1	1	1	1	1	1	1	1	1	1	1	1
MB-2838	1	1	1	1	1	1	1	1	1	1	1	1	1	1	1	1	1	1	1	1	1	1	2	1	1
MB-2801	1	1	1	1	1	1	1	1	1	1	1	1	1	2	1	1	1	1	1	1	1	1	1	1	2
MB-2834	3	3	3	3	3	3	3	3	2	2	5	3	5	3	3	3	3	3	5	3	5	3	3	3	5
MB-2796	2	2	2	2	2	2	2	2	2	1	2	2	2	2	2	2	2	2	1	2	1	2	1	2	2
MB-2857	5	5	5	5	5	5	5	5	5	5	5	5	5	5	5	5	5	5	5	5	5	5	5	5	5
MB-2819	1	1	1	1	1	1	1	1	1	1	1	1	1	1	1	1	1	1	1	1	1	1	1	1	1
MB-2781	2	2	2	2	2	2	2	2	2	2	1	1	2	2	1	2	2	1	2	2	1	2	2	1	2
MB-2793	1	1	1	1	2	1	1	1	1	1	1	1	1	1	1	1	1	1	1	1	1	2	1	1	1
MB-2827	5	5	5	5	5	5	5	5	5	5	5	5	5	5	5	5	5	5	5	5	5	5	5	5	5
MB-2814	2	2	2	2	2	2	2	2	2	2	2	2	2	2	2	1	2	2	2	2	2	2	2	2	2
MB-2791	1	1	1	1	1	1	1	1	1	1	1	1	1	1	1	1	1	1	1	1	1	1	1	1	1
MB-2803	2	2	2	2	2	2	2	2	2	2	2	2	2	2	2	2	2	2	2	2	2	2	2	2	2
MB-2797	1	2	1	1	1	1	1	1	1	1	4	1	1	1	1	1	1	1	4	1	1	1	1	1	4
MB-2795	2	1	1	1	2	2	2	2	1	1	1	2	2	2	2	1	2	2	2	1	2	2	2	1	2
MB-2786	1	2	2	1	1	1	1	1	1	1	1	1	1	1	1	1	1	1	1	1	1	1	1	1	1
MB-3850	1	1	1	1	1	1	1	1	1	1	1	1	1	1	1	1	1	1	1	1	1	1	1	1	1
MB-3556	3	3	3	3	3	3	3	3	3	3	3	3	3	3	3	3	2	3	3	3	3	3	3	2	3
MB-3838	2	2	2	2	2	2	2	2	2	2	2	2	2	2	2	2	1	2	2	2	2	2	2	2	2
MB-3707	1	1	1	1	2	1	1	1	1	2	2	1	2	1	1	1	1	1	2	1	1	1	1	1	2
MB-3600	2	2	2	2	2	2	2	2	2	2	2	2	2	2	2	2	2	2	2	2	2	2	2	2	2
MB-3824	2	2	2	2	2	2	2	2	2	2	2	2	2	2	2	2	2	2	2	2	2	2	2	2	2
MB-3823	1	1	1	1	1	1	1	1	1	1	1	1	1	1	1	1	1	1	1	1	1	1	1	1	1
MB-3781	1	1	1	1	1	1	1	1	1	1	1	1	1	1	1	1	1	1	2	1	1	1	1	1	1
MB-2642	2	2	2	2	2	2	2	2	2	2	2	2	2	2	2	2	2	2	2	2	2	2	2	2	2
MB-2686	2	2	2	2	2	2	2	2	2	2	2	2	2	2	2	2	2	2	2	2	2	2	2	2	2
MB-2616	4	4	4	4	4	4	4	4	1	1	4	1	1	1	1	4	1	1	4	4	4	4	4	1	4
MB-2634	2	2	2	2	2	2	2	2	2	2	2	2	2	2	2	2	2	2	2	2	2	2	2	2	2
MB-2613	2	2	2	2	2	2	2	2	2	2	2	2	2	2	2	2	2	2	2	2	2	2	2	2	2
MB-3842	2	2	2	2	2	2	2	2	2	2	2	2	2	2	2	2	2	2	2	2	2	2	2	2	2
MB-3866	3	3	3	3	3	3	3	3	3	3	3	3	3	3	3	3	3	3	3	3	3	3	3	3	3
MB-3874	1	1	1	1	1	1	1	1	1	1	1	1	2	1	1	1	2	1	1	1	1	1	1	1	1
MB-3871	1	1	1	1	1	1	1	1	1	2	1	1	1	1	1	1	1	1	1	1	1	1	1	1	1
MB-3702	5	5	5	5	5	5	5	5	4	5	5	5	5	5	5	5	3	4	5	5	5	5	5	5	5
MB-3105	1	1	1	1	1	1	1	1	1	1	1	1	1	1	1	1	1	1	1	1	1	1	1	1	1
MB-3852	2	2	2	2	1	1	2	2	1	2	2	1	2	2	2	2	2	2	1	2	2	2	2	1	2
MB-3854	1	1	1	1	1	1	1	1	1	1	1	1	1	1	1	1	1	1	1	1	1	1	1	1	1
MB-3865	1	1	1	1	1	1	1	1	1	1	1	1	1	1	1	1	1	4	1	1	1	1	1	1	1
MB-3228	1	1	1	1	1	1	1	1	1	1	1	1	1	1	1	1	1	1	1	1	1	1	1	1	1
MB-3028	INC	3	3	3	1	1	1	1	2	2	2	2	3	1	1	3	2	2	1	3	3	1	1	1	2
MB-3502	5	5	5	5	5	5	5	5	5	5	5	5	5	5	5	5	5	5	5	5	5	5	5	4	5
MB-3567	5	5	5	5	5	5	5	5	5	5	5	5	5	5	5	5	3	2	5	5	5	5	5	5	5
MB-3752	5	5	5	5	5	5	5	5	5	5	5	5	5	5	5	5	5	5	5	5	5	5	5	5	5
MB-3450	1	1	1	1	1	1	1	1	1	1	1	1	1	1	1	1	1	1	1	1	1	1	1	1	1
MB-0444	2	2	2	2	1	2	2	2	2	1	2	2	2	2	1	2	2	2	1	2	2	1	2	2	2
MB-0476	4	4	4	4	4	4	4	4	4	4	4	4	1	4	5	4	1	4	4	4	4	4	4	1	4
MB-0610	1	1	1	1	1	1	1	1	1	1	4	1	1	1	1	1	1	1	1	1	1	1	1	1	1
MB-0451	1	4	4	1	1	1	1	1	1	1	1	1	1	1	1	1	1	1	1	1	1	1	1	1	1
MB-0133	1	4	4	4	1	1	1	1	1	1	1	1	1	1	1	1	4	1	1	4	1	1	1	1	1

## Sheet: Pred METABRIC Validation PAM50
	Class	BayesNet	NaiveBayes	NaiveBayesUpdateable	Logistic	MultilayerPerceptron	SimpleLogistic	SMO	IBk	KStar	AttributeSelectedClassifier	Bagging	ClassificationViaRegression	LogitBoost	MultiClassClassifier	RandomCommittee	DecisionTable	JRip	PART	HoeffdingTree	J48	LMT	RandomForest	RandomTree	REPTree
MB-0005	2	2	2	2	2	2	2	2	1	1	2	2	2	1	2	2	1	1	2	2	2	2	2	1	2
MB-0048	INC	4	4	4	2	2	2	2	1	1	4	1	5	4	2	1	2	2	2	4	2	2	5	1	1
MB-0025	2	2	2	2	2	2	2	2	2	2	2	2	2	2	2	2	2	2	2	2	2	2	2	2	2
MB-0083	2	2	2	2	2	2	2	2	1	2	2	1	1	2	2	1	1	1	1	2	2	2	1	1	1
MB-0053	2	2	2	2	2	2	2	2	2	2	2	2	2	2	2	2	1	2	2	2	2	2	2	2	2
MB-0056	2	2	2	2	2	2	2	2	2	2	2	2	2	2	2	2	2	2	2	2	2	2	2	2	2
MB-0068	1	1	1	1	1	1	1	1	1	1	4	1	1	1	1	1	1	1	1	1	2	1	1	1	4
MB-0093	2	2	2	2	2	2	2	2	1	2	2	2	2	2	2	2	1	2	2	2	2	2	2	1	2
MB-0079	INC	3	3	3	3	3	2	3	5	2	3	3	5	2	2	2	2	5	3	3	3	2	5	4	3
MB-0108	2	2	2	2	2	2	2	2	1	1	2	2	2	2	2	2	1	2	2	2	2	2	1	4	2
MB-0006	1	1	1	1	2	1	2	2	2	1	2	1	1	1	2	1	1	2	1	1	1	2	1	1	2
MB-0014	1	1	1	1	2	1	1	1	1	1	1	1	1	1	1	1	1	1	1	1	1	1	1	1	2
MB-0022	2	1	2	2	2	2	2	2	2	1	4	1	1	2	2	1	1	2	1	2	2	2	1	1	1
MB-0039	INC	1	1	1	2	2	2	2	1	2	2	1	1	1	2	1	1	2	2	1	2	2	1	1	2
MB-0062	5	5	5	5	5	5	5	5	5	5	5	5	5	5	2	5	5	5	5	5	5	5	5	5	5
MB-0054	2	2	2	2	2	2	2	2	2	2	2	2	2	2	2	2	2	2	2	2	1	2	2	1	2
MB-0081	2	1	2	2	2	2	2	2	1	1	4	1	1	2	2	1	1	2	2	2	2	2	1	1	1
MB-0071	2	2	2	2	2	2	2	2	2	2	1	2	2	2	2	2	1	2	2	2	1	2	2	1	1
MB-0099	2	1	2	2	2	2	2	2	1	1	4	1	1	2	2	1	2	1	2	2	2	2	1	1	1
MB-0064	2	2	2	2	2	2	2	2	2	2	2	2	2	2	2	2	1	2	2	2	2	2	2	2	2
MB-0107	2	2	2	2	2	2	2	2	2	2	2	2	2	2	2	2	2	2	2	2	2	2	2	2	2
MB-4681	1	1	1	1	1	1	1	1	1	1	1	1	1	1	1	1	1	1	1	1	1	1	1	1	1
MB-4626	1	3	3	3	3	1	1	1	1	1	1	1	1	1	1	1	1	1	1	3	3	1	1	1	4
MB-4639	1	1	2	2	1	1	1	1	2	1	2	1	2	1	1	1	1	1	1	2	1	1	1	2	1
MB-4673	2	2	2	2	2	2	2	2	2	2	2	2	2	2	2	2	2	2	2	2	1	2	2	2	2
MB-4711	3	3	3	3	4	3	3	3	5	5	5	3	4	5	4	5	3	3	5	3	5	3	5	3	3
MB-4607	1	1	1	1	1	1	1	1	1	1	1	1	1	1	1	1	1	1	1	1	1	1	1	1	1
MB-4669	2	2	2	2	2	2	2	2	2	2	2	2	2	2	2	2	2	2	2	2	2	2	2	2	2
MB-4015	3	3	3	3	3	3	3	3	3	3	3	3	3	3	5	3	3	3	3	3	3	3	3	5	3
MB-2931	1	1	1	1	2	1	1	1	1	1	1	1	1	1	1	1	1	1	1	1	1	1	1	1	1
MB-2927	1	1	1	1	1	1	1	1	1	1	2	1	1	1	1	1	1	1	1	1	2	1	1	1	1
MB-2919	1	1	1	1	2	1	1	1	1	1	1	1	1	1	1	1	1	1	1	1	1	1	1	1	1
MB-2944	1	1	1	1	1	1	1	1	1	1	1	1	1	1	1	1	1	1	1	1	1	1	1	1	1
MB-2929	3	3	3	3	3	3	3	3	3	3	3	3	3	3	3	3	1	3	3	3	3	3	3	3	3
MB-2932	2	2	2	2	2	2	2	2	2	1	2	2	2	2	2	2	1	2	2	2	2	2	2	2	2
MB-2724	4	4	4	4	4	5	5	5	4	4	4	4	4	5	4	4	1	5	3	4	4	5	4	5	5
MB-2712	1	1	1	1	1	1	1	1	1	1	1	1	1	1	1	1	1	1	1	1	1	1	1	1	1
MB-2720	INC	2	1	1	2	1	2	2	1	1	2	2	2	2	1	2	1	1	1	1	1	2	1	2	2
MB-3062	5	5	5	5	5	5	5	5	5	5	5	5	5	5	5	5	5	5	5	5	5	5	5	5	5
MB-3050	2	2	2	2	2	2	2	2	2	1	2	2	2	2	2	2	2	2	2	2	1	2	2	1	2
MB-4722	1	1	1	1	1	1	1	1	1	1	1	1	1	1	1	1	1	1	1	1	1	1	1	1	1
MB-4731	3	3	3	3	3	3	3	3	3	3	3	3	5	2	3	2	2	3	3	3	3	3	3	2	3
MB-4725	INC	2	2	2	1	1	1	1	1	1	2	2	2	1	1	2	2	2	2	2	1	1	2	1	1
MB-4707	5	5	5	5	5	5	5	5	5	5	5	5	5	5	5	5	5	5	5	5	5	5	5	5	5
MB-4643	3	3	3	3	3	3	3	3	3	3	3	3	3	3	3	3	3	3	3	3	3	3	3	3	3
MB-3363	5	5	5	5	2	2	2	5	3	2	5	5	5	5	2	5	5	3	5	5	5	2	5	5	5
MB-3383	5	5	5	5	5	5	5	5	5	5	5	5	5	5	5	5	5	5	5	5	5	5	5	5	5
MB-3344	1	1	1	1	1	1	1	1	1	1	1	1	1	1	1	1	1	1	1	1	1	1	1	1	1
MB-3381	1	1	1	1	1	1	1	1	1	1	1	1	1	1	1	1	1	4	1	1	1	1	1	1	1
MB-3297	5	5	5	5	5	5	5	5	5	5	5	5	5	5	5	5	5	5	5	5	5	5	5	5	5
MB-3301	INC	2	2	2	2	2	2	1	1	2	1	1	1	1	1	2	2	2	1	2	1	2	1	1	1
MB-3088	1	1	1	1	1	1	1	1	1	1	1	1	1	1	1	1	1	1	1	1	1	1	1	1	1
MB-2764	4	4	4	4	4	4	4	4	4	4	4	4	4	4	4	4	1	4	4	4	4	4	4	4	4
MB-2744	4	4	4	4	4	4	4	4	4	4	4	4	4	4	4	4	4	4	4	4	4	4	4	4	4
MB-7114	5	5	5	5	5	5	5	5	5	5	5	5	5	5	5	5	5	5	5	5	5	5	5	5	5
MB-7118	1	1	1	1	1	1	1	1	1	1	1	1	1	1	1	1	1	1	1	1	1	1	1	1	1
MB-7113	1	1	1	1	1	1	1	1	1	1	1	1	1	1	1	1	1	1	1	1	1	1	1	1	1
MB-7130	2	2	2	2	2	2	2	2	2	2	2	2	2	2	2	2	2	2	2	2	2	2	2	2	1
MB-7149	2	2	2	2	2	2	2	2	2	2	2	2	2	2	2	2	2	2	2	2	2	2	2	2	1
MB-7140	2	2	2	2	2	2	2	2	2	2	2	2	2	2	2	2	2	2	2	2	2	2	2	2	2
MB-7148	1	2	1	1	1	1	1	1	1	1	1	1	1	1	1	1	2	1	1	1	1	1	1	1	1
MB-7208	3	3	3	3	3	3	3	3	3	2	3	3	3	3	3	3	3	5	3	3	3	3	3	3	3
MB-7170	1	1	1	1	1	1	1	1	1	2	1	1	1	1	1	1	1	1	1	1	2	1	1	1	1
MB-7174	2	2	2	2	2	2	2	2	2	2	2	2	2	2	2	2	2	2	2	2	2	2	2	2	2
MB-7252	3	3	3	3	3	3	3	3	3	5	3	3	3	3	3	3	3	3	3	3	3	3	3	3	3
MB-7244	1	1	1	1	1	1	1	1	1	1	1	1	1	1	1	1	1	1	1	1	1	1	1	1	1
MB-7187	4	4	4	4	4	4	4	4	4	4	4	4	1	4	4	4	4	1	4	4	4	4	4	4	4
MB-7251	3	3	3	3	3	3	3	3	3	3	3	3	3	3	3	3	1	3	3	3	3	3	3	3	3
MB-7173	1	2	1	1	1	1	1	1	1	1	1	1	1	1	1	1	2	1	1	1	1	1	1	1	1
MB-3001	5	5	5	5	5	5	5	5	5	5	5	5	5	5	5	5	5	5	5	5	5	5	5	5	5
MB-2952	1	1	1	1	1	1	1	1	1	1	1	1	1	1	1	1	1	1	1	1	1	1	1	1	1
MB-7097	1	2	2	2	1	1	1	1	1	1	2	1	2	1	1	2	1	2	1	2	2	1	1	3	1
MB-7104	2	3	3	3	3	3	3	2	2	3	2	2	2	5	2	2	2	2	2	3	2	3	2	5	2
MB-7099	2	2	2	2	2	2	2	2	2	2	2	2	2	2	2	2	1	3	2	2	2	2	2	2	2
MB-7069	3	3	3	3	3	3	3	3	3	3	3	3	3	3	3	3	1	3	3	3	3	3	3	5	3
MB-7066	1	4	4	4	3	1	1	1	4	4	1	4	1	1	1	4	1	1	1	4	4	1	1	1	1
MB-7100	2	2	2	2	2	2	2	2	1	2	2	2	2	2	2	2	1	2	2	2	2	2	2	1	2
MB-7067	3	3	3	3	3	3	3	3	5	3	3	5	5	3	5	3	3	3	5	3	3	3	3	5	3
MB-7073	3	3	3	3	3	3	3	3	5	3	3	3	3	3	3	3	3	3	3	3	3	3	3	1	3
MB-7063	1	1	1	1	1	1	1	1	1	1	1	1	1	1	1	1	1	1	1	1	1	1	1	1	1
MB-7102	2	2	2	2	2	2	2	2	1	2	2	1	1	2	2	2	1	2	2	2	2	2	2	1	2
MB-7068	2	3	3	3	3	2	2	2	2	2	2	2	2	2	2	2	2	3	2	3	2	2	2	2	2
MB-7075	2	2	2	2	2	2	2	2	2	2	2	2	2	2	2	2	1	2	2	2	2	2	2	2	2
MB-7053	1	1	1	1	1	1	1	1	1	1	1	1	1	1	1	1	1	1	1	1	1	1	1	1	1
MB-7074	1	4	1	1	1	1	1	1	1	1	4	1	1	1	1	1	1	1	1	1	4	1	1	4	1
MB-7057	4	1	4	4	4	4	4	4	4	4	4	4	1	4	4	1	1	1	1	4	1	4	1	1	1
MB-7109	2	2	2	2	2	2	2	2	2	2	2	2	2	2	2	2	2	2	2	2	2	2	2	2	2
MB-7051	2	2	2	2	2	2	2	2	2	2	2	2	1	2	2	2	2	2	2	2	2	2	2	2	2
MB-7071	2	2	2	2	2	2	2	2	2	1	1	2	2	2	2	1	2	2	1	2	2	2	2	1	4
MB-7106	1	1	1	1	1	1	1	1	1	1	1	1	1	1	1	1	1	1	1	1	1	1	1	1	1
MB-7059	3	3	3	3	3	3	3	3	3	2	3	3	3	3	3	3	2	3	3	3	3	3	3	3	3
MB-7107	1	2	1	1	1	1	1	1	1	2	1	1	1	2	1	1	1	3	2	1	1	1	1	3	2
MB-7076	1	1	1	1	1	1	1	1	1	1	1	1	1	1	1	1	1	1	2	1	1	1	1	1	1
MB-7111	2	3	2	2	2	5	2	2	1	1	3	2	2	2	2	1	2	1	5	2	2	2	2	5	4
MB-7015	2	2	2	2	2	2	2	2	2	2	2	2	2	2	2	2	1	2	2	2	2	2	2	2	2
MB-7026	1	1	1	1	2	1	2	1	1	1	1	1	1	1	1	1	1	1	1	1	1	2	1	1	1
MB-7013	1	1	1	1	1	1	1	1	1	1	1	1	1	1	1	1	1	1	1	1	1	1	1	1	1
MB-7023	5	5	5	5	5	5	5	5	5	5	5	5	5	5	5	5	5	5	5	5	5	5	5	5	5
MB-7024	2	2	2	2	2	2	2	2	2	2	2	2	2	2	2	2	2	2	2	2	2	2	2	2	2
MB-7014	INC	2	2	2	2	2	2	2	4	1	4	1	1	2	1	1	3	2	2	2	1	2	1	1	1
MB-7017	5	5	5	5	5	5	5	5	5	5	5	5	5	5	5	5	5	5	5	5	5	5	5	5	5
MB-7019	1	1	1	1	1	1	1	1	1	1	1	1	1	1	1	1	1	1	1	1	1	1	1	1	1
MB-3510	1	1	1	1	1	1	1	1	1	1	1	1	1	1	1	1	1	1	1	1	1	1	1	1	1
MB-3500	5	5	5	5	5	5	5	5	5	5	5	5	5	5	5	5	5	5	5	5	5	5	5	5	5
MB-3396	3	3	3	3	3	5	5	3	5	3	3	5	5	3	5	5	3	3	1	3	3	5	5	5	3
MB-3435	3	3	3	3	3	3	3	3	3	3	3	3	3	3	3	3	2	3	3	3	3	3	3	3	3
MB-7186	2	2	2	2	2	2	2	2	1	2	2	2	2	2	2	2	2	2	2	2	2	2	2	2	2
MB-7142	2	2	2	2	2	2	2	2	2	2	2	2	2	2	2	2	2	2	2	2	2	2	2	1	2
MB-7196	2	2	2	2	2	2	2	2	2	2	4	2	3	2	2	2	2	2	2	2	2	2	2	1	2
MB-7171	2	2	2	2	2	2	2	2	1	2	2	2	2	2	2	2	2	2	2	2	2	2	2	5	1
MB-7145	5	5	5	5	5	5	5	5	5	5	5	5	5	5	5	5	5	5	5	5	5	5	5	5	5
MB-7132	1	1	1	1	1	1	1	1	1	1	1	1	1	1	1	1	1	1	1	1	1	1	1	2	1
MB-7189	2	2	2	2	2	2	2	2	2	2	2	2	2	2	2	2	2	2	2	2	2	2	2	2	2
MB-7137	1	1	1	1	1	1	1	1	1	1	1	1	1	1	1	1	1	1	1	1	1	1	1	1	1
MB-7181	2	1	2	2	2	2	2	2	2	2	1	1	2	1	2	1	1	2	1	2	1	2	1	2	1
MB-7155	5	5	5	5	5	5	5	5	5	5	5	5	5	5	5	5	5	5	5	5	5	5	5	5	5
MB-7138	2	2	2	2	2	2	2	2	2	2	2	2	2	2	2	2	2	2	2	2	2	2	2	2	2
MB-3295	INC	4	4	4	1	4	4	4	1	1	4	1	1	1	1	1	4	1	1	4	4	4	1	4	1
MB-3218	5	5	5	5	5	5	5	5	5	5	5	5	5	5	5	5	5	5	5	5	5	5	5	5	5
MB-7232	1	1	1	1	1	1	1	1	1	1	1	1	1	1	1	1	1	1	1	1	1	1	1	1	1
MB-7281	3	3	3	3	3	3	3	3	3	1	3	3	3	5	3	3	1	3	3	3	3	3	3	5	4
MB-7270	5	5	5	5	5	5	5	5	3	2	3	3	5	5	2	5	3	3	3	5	3	5	5	5	3
MB-7231	1	1	1	1	1	1	1	1	1	1	1	1	1	1	1	1	1	1	1	1	1	1	1	1	1
MB-7220	1	1	1	1	1	1	1	1	2	1	1	1	1	1	1	1	1	1	1	1	1	1	1	1	1
MB-7277	1	1	1	1	1	1	1	1	1	1	1	1	1	1	1	1	1	1	1	1	1	1	1	1	1
MB-7269	5	5	5	5	5	5	5	5	5	5	5	5	5	5	5	5	5	5	5	5	5	5	5	5	5
MB-7280	1	1	1	1	1	1	1	1	1	1	1	1	1	1	1	1	1	1	1	1	1	1	1	1	1
MB-7227	1	1	3	3	4	4	4	4	1	1	1	1	1	1	4	1	1	1	1	3	1	4	1	4	1
MB-7278	1	1	1	1	1	1	1	1	1	1	1	1	1	1	1	1	1	1	1	1	1	1	1	1	1
MB-2610	1	1	1	1	1	1	1	1	1	1	1	1	1	1	1	1	1	1	1	1	1	1	1	1	1
MB-2517	3	3	3	3	3	3	3	3	5	5	3	3	3	3	3	3	2	3	3	3	3	3	3	4	3
MB-2896	1	1	1	1	1	1	1	1	1	1	4	1	1	1	1	1	1	1	1	1	1	1	1	3	1
MB-2901	2	2	2	2	2	2	2	2	2	1	2	2	2	2	2	2	2	2	2	2	2	2	2	2	2
MB-2895	3	3	3	3	3	3	3	3	5	3	3	3	3	3	3	3	3	3	3	3	3	3	3	3	3
MB-2900	4	4	4	4	4	4	4	4	4	1	4	4	4	4	4	4	4	4	4	4	4	4	4	4	4
MB-2939	2	2	2	2	2	2	2	2	2	2	2	2	2	2	2	2	2	2	2	2	2	2	2	2	2
MB-7008	INC	4	4	4	4	3	4	4	3	1	1	1	3	3	3	4	1	5	3	4	4	4	4	1	3
MB-7002	2	2	2	2	1	2	2	1	1	1	2	2	1	2	1	1	1	2	2	2	1	2	1	2	1
MB-7000	2	2	2	2	2	2	2	2	1	2	2	2	2	2	1	2	2	2	2	2	2	2	2	2	2
MB-7006	1	1	1	1	1	1	1	1	1	1	1	1	1	1	1	1	1	1	1	1	1	1	1	1	1
MB-7007	5	5	5	5	5	5	5	5	5	3	5	5	5	5	5	5	3	5	5	5	5	5	5	5	3
MB-7011	2	2	2	2	2	2	2	2	2	2	2	2	2	2	2	2	2	2	2	2	2	2	2	2	2
MB-7001	1	1	1	1	1	1	1	1	1	1	1	1	1	1	1	1	2	1	1	1	1	1	1	1	1
MB-7009	5	5	5	5	5	5	5	5	5	5	5	5	5	5	5	5	5	5	5	5	5	5	5	5	5
MB-7003	1	4	1	1	4	1	1	1	1	1	1	1	1	1	1	1	3	4	1	1	1	1	1	1	1
MB-7005	1	1	1	1	2	1	1	1	1	1	1	1	1	2	2	1	1	1	1	1	1	1	1	1	1
MB-7010	1	1	1	1	1	1	1	1	1	1	1	1	1	1	1	1	1	1	1	1	1	1	1	1	1
MB-3153	3	3	3	3	3	3	3	3	3	3	3	5	3	3	3	3	1	3	3	3	3	3	3	5	5
MB-3211	5	5	5	5	5	5	5	5	5	5	5	5	5	5	5	5	5	5	5	5	5	5	5	5	5
MB-3181	2	2	2	2	2	2	2	2	2	2	2	2	2	2	2	2	2	2	2	2	1	2	2	2	2
MB-3252	1	1	1	1	1	1	1	1	1	1	1	1	1	1	1	1	1	1	1	1	1	1	1	4	1
MB-3266	INC	2	1	1	2	2	2	2	1	2	1	1	1	2	2	1	2	2	1	1	1	2	1	1	2
MB-7082	3	3	3	3	3	3	3	3	3	3	3	3	3	3	3	3	2	3	3	3	3	3	3	3	3
MB-7081	5	5	5	5	5	5	5	5	5	5	5	5	5	5	5	5	5	5	5	5	5	5	5	5	5
MB-7093	1	1	1	1	1	1	1	1	1	1	1	1	1	1	1	1	1	1	1	1	1	1	1	1	1
MB-7083	2	2	2	2	2	2	2	2	1	2	2	2	2	2	2	2	1	2	2	2	2	2	2	1	2
MB-7091	1	1	1	1	1	1	1	1	1	1	1	1	1	1	1	1	1	1	1	1	1	1	1	1	1
MB-7065	1	1	1	1	1	1	1	1	2	1	1	1	1	1	1	1	1	1	2	1	2	1	1	1	2
MB-7085	1	4	1	1	1	1	1	1	1	1	1	1	1	1	1	1	1	1	1	1	1	1	1	1	1
MB-7096	1	1	1	1	1	1	1	1	1	1	1	1	1	1	1	1	1	1	1	1	1	1	1	1	1
MB-7018	1	2	1	1	1	2	2	1	1	2	1	1	2	1	1	1	1	2	1	1	1	2	1	1	2
MB-7088	3	3	3	3	3	3	3	3	3	3	3	3	3	3	3	3	1	3	3	3	3	3	3	4	1
MB-7055	5	5	5	5	5	5	5	5	5	3	5	5	3	5	3	5	3	5	5	5	3	5	5	5	3
MB-7080	1	1	1	1	1	1	1	1	1	1	1	1	1	1	1	1	1	1	1	1	1	1	1	1	1
MB-7161	1	1	1	1	1	1	1	1	1	1	1	1	1	1	1	1	1	1	1	1	1	1	1	1	1
MB-7115	3	3	3	3	3	3	3	3	3	2	3	2	2	3	3	3	2	3	3	3	3	3	2	3	2
MB-7123	1	1	1	1	1	1	1	1	1	1	1	1	1	1	1	1	1	1	1	1	1	1	1	1	1
MB-7176	1	2	2	2	1	1	1	1	1	1	1	1	1	1	1	1	1	2	1	2	1	1	2	1	2
MB-7121	5	5	5	5	5	5	5	5	5	5	5	5	5	5	5	5	5	5	5	5	5	5	5	5	5
MB-7172	1	1	1	1	1	1	1	1	2	1	1	1	1	2	1	1	1	2	1	1	1	1	1	1	1
MB-7164	1	1	1	1	1	1	1	1	1	1	1	1	1	1	1	1	1	1	1	1	1	1	1	1	1
MB-7127	4	4	4	4	4	4	4	4	4	1	2	1	1	4	4	1	1	3	1	4	1	4	4	5	1
MB-7128	1	1	1	1	1	1	1	1	1	1	1	1	1	1	1	1	1	1	1	1	1	1	1	1	1
MB-7157	2	2	2	2	2	2	2	2	2	2	2	2	1	2	2	2	1	2	1	2	2	2	2	1	1
MB-7092	2	2	2	2	2	2	2	2	2	2	2	2	2	2	2	2	2	2	2	2	2	2	2	2	1
MB-7135	3	3	3	3	3	3	3	3	3	3	3	3	3	2	3	3	1	3	3	3	3	3	3	2	3
MB-3754	2	2	2	2	2	2	2	2	2	2	3	1	2	1	2	1	1	1	2	2	1	2	1	3	2
MB-3536	INC	4	4	4	4	4	4	4	1	1	1	1	4	1	1	1	1	1	4	4	4	4	1	1	1
MB-3748	1	1	1	1	1	1	1	1	1	1	1	1	1	1	1	1	1	1	1	1	1	1	1	1	1
MB-3530	1	1	1	1	1	1	1	1	1	1	2	1	1	1	1	1	1	2	1	1	1	1	1	1	2
MB-3582	4	4	4	4	4	4	4	4	4	4	3	4	4	4	4	1	4	1	4	4	4	4	4	1	4
MB-3528	3	3	3	3	3	2	2	3	2	2	1	3	3	3	3	3	2	3	1	3	3	2	3	2	3
MB-3547	1	1	1	1	1	1	1	1	1	1	1	1	1	1	1	1	1	1	1	1	1	1	1	4	1
MB-3576	2	2	2	2	2	2	2	2	2	2	2	2	2	2	2	2	2	2	2	2	2	2	2	2	2
MB-2770	1	1	1	1	1	1	1	1	1	1	1	1	1	1	1	1	1	1	1	1	1	1	1	1	4
MB-2758	3	3	3	3	3	5	5	3	5	5	3	3	5	5	5	3	1	5	3	3	3	5	5	3	3
MB-2771	5	5	5	5	5	5	5	5	5	5	5	5	5	5	5	5	1	5	5	5	5	5	5	5	5
MB-7152	2	2	2	2	2	2	2	2	2	2	2	2	2	2	2	2	2	2	2	2	2	2	2	2	2
MB-7143	3	3	3	3	3	3	3	3	3	3	3	3	3	3	3	3	3	3	3	3	3	3	3	5	3
MB-7197	1	1	2	2	1	1	1	1	1	1	1	1	1	1	1	1	1	1	1	2	1	1	1	1	1
MB-7153	2	2	2	2	2	2	2	2	2	2	2	2	2	2	1	1	1	1	3	2	2	2	2	2	3
MB-7144	2	2	2	2	2	2	2	2	2	2	2	2	2	2	2	2	1	2	2	2	2	2	2	2	1
MB-7185	1	1	1	1	1	1	1	1	1	1	1	1	1	1	1	1	1	1	1	1	1	1	1	1	1
MB-7199	2	2	2	2	2	2	2	2	2	2	2	2	2	2	2	2	1	2	2	2	2	2	2	1	2
MB-7158	5	5	5	5	5	5	5	5	5	5	4	5	4	5	5	5	1	4	4	5	4	5	5	4	5
MB-7163	1	1	1	1	1	1	1	1	1	1	1	1	1	1	1	1	1	1	1	1	1	1	1	1	1
MB-7215	1	1	1	1	1	1	1	1	1	1	1	1	1	1	1	1	1	1	1	1	1	1	1	1	1
MB-7200	1	1	1	1	1	1	1	1	1	1	2	1	1	1	1	1	1	1	2	1	2	1	1	1	1
MB-7193	2	2	2	2	2	2	2	2	2	2	2	2	2	2	2	2	2	2	2	2	2	2	2	2	2
MB-7188	1	1	1	1	1	1	1	1	1	1	1	1	1	1	1	1	1	1	1	1	1	1	1	1	1
MB-7198	INC	3	3	3	5	5	4	2	1	2	4	1	4	2	2	2	1	2	4	3	1	4	2	5	4
MB-7256	3	3	3	3	1	3	3	3	3	1	3	3	3	3	4	3	2	3	3	3	3	3	3	1	3
MB-7258	5	5	5	5	5	5	5	5	5	5	5	5	5	5	5	5	5	5	5	5	5	5	5	5	5
MB-7194	2	2	2	2	2	2	2	2	2	2	2	2	2	2	2	2	2	2	2	2	2	2	2	2	2
MB-7254	1	1	1	1	1	1	1	1	1	2	1	1	1	1	1	1	1	1	1	1	1	1	1	1	1
MB-7262	2	2	3	3	2	3	3	3	3	2	2	2	2	2	2	2	2	3	2	3	2	3	2	2	2
MB-2990	1	1	1	1	1	1	1	1	1	1	1	1	1	1	1	1	1	1	1	1	1	1	1	1	1
MB-2993	5	5	5	5	5	5	5	5	5	5	5	5	5	5	5	5	5	5	5	5	5	5	5	5	5
MB-3031	3	3	3	3	2	2	2	2	3	2	3	3	3	2	2	3	2	5	3	3	3	2	3	2	3
MB-2904	5	5	5	5	5	5	5	5	5	5	5	5	5	5	5	5	5	5	5	5	5	5	5	5	5
MB-2846	INC	4	4	4	4	4	4	4	1	1	1	1	1	1	4	1	3	1	4	4	1	4	1	5	1
MB-7154	5	5	5	5	5	5	5	5	5	5	5	5	5	5	5	5	5	5	5	5	5	5	5	5	5
MB-7229	1	1	1	1	1	1	1	1	2	1	2	1	1	1	1	1	1	1	1	1	1	1	1	1	1
MB-7151	5	5	5	5	5	5	5	5	5	5	5	5	5	5	5	5	5	5	5	5	5	5	5	5	5
MB-7228	1	1	1	1	1	1	1	1	1	1	4	1	1	1	1	1	4	1	1	1	4	1	1	1	4
MB-7218	1	1	1	1	1	1	1	1	1	1	1	1	1	1	1	1	1	1	1	1	1	1	1	1	1
MB-7147	2	2	2	2	2	2	2	2	2	2	2	2	2	2	2	2	2	2	2	2	2	2	2	2	2
MB-7219	1	1	1	1	1	1	1	1	1	1	1	1	1	1	1	1	1	1	1	1	1	1	1	1	1
MB-7165	5	5	5	5	4	5	5	5	5	5	5	5	5	5	4	5	5	5	5	5	5	5	5	5	5
MB-7150	2	2	2	2	2	2	2	2	1	2	2	2	2	2	2	2	2	2	2	2	2	2	2	2	2
MB-3436	2	2	2	2	2	2	2	2	2	2	2	2	2	2	2	2	1	2	2	2	2	2	2	2	2
MB-3462	1	1	1	1	1	1	1	1	1	1	1	1	1	1	1	1	1	1	1	1	1	1	1	1	1
MB-3417	1	1	1	1	2	2	2	1	2	2	2	1	1	2	2	1	1	1	1	1	1	2	1	2	2
MB-2721	1	1	1	1	1	1	1	1	1	1	1	1	1	1	1	1	1	1	1	1	1	1	1	1	1
MB-3092	2	2	2	2	2	2	2	2	2	2	2	2	2	2	2	2	1	1	1	2	1	2	1	1	2
MB-2821	5	4	4	4	5	5	5	5	5	1	5	5	5	5	5	5	5	5	5	4	5	5	5	5	5
MB-2850	5	5	5	5	5	5	5	5	5	5	5	5	5	5	5	5	5	5	5	5	5	5	5	5	5
MB-2820	1	1	1	1	1	1	1	1	1	1	1	1	1	1	1	1	1	1	1	1	1	1	1	1	1
MB-2823	1	4	4	4	1	1	1	4	1	1	1	1	1	1	1	1	1	1	1	4	1	1	1	3	1
MB-2792	2	2	2	2	2	2	2	2	2	2	1	1	1	1	1	1	1	1	2	2	1	2	1	2	1
MB-7273	3	3	3	3	3	3	3	3	3	3	3	3	3	3	3	3	3	3	3	3	3	3	3	3	3
MB-7283	2	2	2	2	1	1	1	1	2	2	2	2	2	2	1	2	2	1	2	2	1	1	1	1	2
MB-7284	1	1	1	1	1	1	1	1	1	1	1	1	1	1	1	1	1	1	1	1	1	1	1	4	1
MB-7279	3	3	3	3	3	3	3	3	3	3	2	2	2	3	3	3	2	3	2	3	2	3	3	3	2
MB-7233	1	1	1	1	1	1	1	1	1	1	1	1	1	1	1	1	1	1	1	1	1	1	1	1	1
MB-7287	2	2	2	2	2	2	2	2	2	2	2	2	2	2	2	2	2	2	2	2	2	2	2	2	2
MB-7250	3	3	3	3	3	3	3	3	1	1	3	3	3	3	3	3	4	1	3	3	3	3	3	5	3
MB-7238	2	2	2	2	2	2	2	2	2	2	2	2	2	2	2	2	2	2	2	2	2	2	2	2	2
MB-7285	1	1	1	1	2	1	1	1	1	1	1	2	2	1	1	2	2	2	1	1	1	1	2	1	1
MB-7260	3	3	3	3	3	2	3	2	2	2	2	1	3	3	3	2	2	2	3	3	3	3	3	2	2
MB-7264	1	1	1	1	1	1	1	1	1	1	1	1	1	1	1	1	1	1	1	1	1	1	1	1	1
MB-7268	1	1	1	1	1	1	1	1	1	1	1	1	1	1	1	1	1	1	1	1	2	1	1	1	1
MB-7276	1	1	1	1	1	1	1	1	2	1	1	1	1	1	1	1	1	1	1	1	1	1	1	1	1
MB-7212	1	1	4	4	1	1	1	1	1	1	1	1	1	1	1	1	1	1	1	4	1	1	1	1	1
MB-7267	5	5	5	5	5	5	5	5	5	5	5	5	5	5	5	5	5	5	5	5	5	5	5	5	5
MB-7266	1	1	1	1	1	1	1	1	1	1	1	1	1	1	1	1	1	2	1	1	1	1	1	1	2
MB-7216	1	1	1	1	1	1	1	1	1	2	1	1	1	1	1	1	1	1	1	1	1	1	1	1	1
MB-7195	1	1	1	1	1	1	1	1	1	1	1	1	1	1	1	1	1	1	1	1	1	1	1	1	1
MB-7201	INC	3	3	3	4	5	4	3	2	1	1	3	3	3	1	3	2	1	4	3	1	4	3	4	3
MB-7217	1	1	1	1	1	1	1	1	1	1	1	1	1	1	1	1	1	1	1	1	1	1	1	1	1
MB-2815	1	4	4	4	1	1	1	1	1	1	1	1	1	1	1	1	1	1	1	4	1	1	1	4	1
MB-2833	5	5	5	5	5	5	5	5	5	5	5	5	5	5	5	5	1	5	5	5	5	5	5	5	5
MB-3614	2	2	2	2	2	2	2	2	2	2	2	2	2	2	2	2	2	2	2	2	2	2	2	2	2
MB-7052	5	5	5	5	5	5	5	5	5	2	3	5	5	5	2	5	5	3	5	5	3	5	5	5	5
MB-7124	1	1	1	1	1	1	1	1	1	1	1	1	1	2	1	1	1	1	1	1	1	1	1	2	1
MB-7122	INC	3	3	3	3	3	3	3	3	1	2	1	1	2	1	2	1	1	2	3	1	3	2	5	2
MB-7133	2	2	2	2	2	2	2	2	2	1	1	2	2	2	1	1	2	1	1	2	2	2	1	2	1
MB-7084	5	5	5	5	5	5	5	5	5	5	5	5	5	5	5	5	5	5	5	5	5	5	5	5	5
MB-7101	1	1	1	1	1	1	1	1	1	1	1	1	1	1	1	1	1	1	1	1	1	1	1	1	1
MB-7116	2	2	2	2	2	2	2	2	2	2	2	2	1	2	2	2	1	2	1	2	1	2	1	1	2
MB-7131	2	2	2	2	2	2	2	2	2	2	2	2	2	2	2	2	1	2	2	2	2	2	2	2	1
MB-7090	5	3	5	5	3	5	5	5	5	5	3	5	3	3	3	5	3	5	3	5	3	5	5	4	3
MB-7095	1	1	1	1	1	1	1	1	1	1	1	1	1	1	1	1	1	1	1	1	2	1	1	1	1
MB-7094	2	2	2	2	2	2	2	2	2	2	3	2	2	2	2	2	1	2	2	2	3	2	2	2	2
MB-7087	5	5	5	5	5	5	5	5	5	5	5	5	5	5	5	5	5	3	5	5	5	5	5	5	5
MB-7077	1	1	1	1	1	1	1	1	1	1	1	1	1	1	1	1	1	1	1	1	1	1	1	1	1
MB-7072	2	2	2	2	2	2	2	2	2	2	2	2	2	2	2	2	2	2	2	2	2	2	2	2	2
MB-7041	1	1	1	1	1	1	1	1	1	1	1	1	1	1	1	1	1	1	1	1	1	1	1	1	1
MB-7044	4	4	4	4	4	4	4	4	4	1	4	4	4	4	4	4	4	4	4	4	4	4	4	4	4
MB-7022	2	2	1	1	2	2	2	2	2	1	2	2	1	2	1	2	1	1	1	1	2	2	2	2	2
MB-7070	2	2	2	2	1	2	2	2	1	2	2	1	1	2	1	1	2	2	1	2	1	2	2	2	1
MB-7079	4	4	4	4	1	4	4	4	1	4	4	1	4	4	1	4	4	1	1	4	4	4	1	1	1
MB-7035	3	3	3	3	2	3	3	2	3	1	1	3	3	4	2	3	2	2	4	3	3	3	4	1	3
MB-7025	5	5	5	5	5	5	5	5	5	5	5	5	5	5	5	5	5	5	5	5	5	5	5	5	5
MB-7062	1	1	1	1	1	1	1	1	1	1	1	1	1	1	1	1	1	1	1	1	1	1	1	1	1
MB-7036	5	5	5	5	5	5	5	5	5	5	5	5	5	5	5	5	5	5	5	5	5	5	5	5	5
MB-7046	2	2	2	2	2	2	2	2	2	2	2	2	2	2	2	2	2	2	2	2	2	2	2	1	2
MB-4839	1	1	1	1	1	1	1	1	1	1	2	1	2	1	1	1	1	2	2	1	1	1	1	2	2
MB-5559	4	4	4	4	4	4	4	4	4	4	3	4	5	4	5	4	5	1	5	4	4	4	5	5	5
MB-5463	2	2	2	2	1	1	1	2	2	2	1	2	2	2	1	2	1	2	2	2	2	1	2	2	1
MB-4744	2	2	2	2	2	2	2	2	1	1	2	2	2	2	1	2	1	2	2	2	1	2	2	1	1
MB-4769	5	5	5	5	5	5	5	5	5	5	5	5	5	5	5	5	1	5	5	5	5	5	5	2	5
MB-4484	1	4	4	4	4	4	4	4	4	1	1	1	1	1	1	1	1	1	1	4	1	4	1	4	1
MB-5558	4	4	4	4	5	4	4	4	5	1	4	3	4	4	4	4	3	5	4	4	5	4	4	5	3
MB-4750	2	2	2	2	2	2	2	2	2	2	2	2	1	2	2	2	2	1	2	2	1	2	1	2	1
MB-4793	5	5	5	5	5	5	5	5	5	5	5	5	5	5	4	5	5	5	5	5	5	5	5	5	5
MB-4843	1	1	1	1	1	1	1	1	1	1	1	1	1	1	1	1	1	1	2	1	1	1	1	1	2
MB-5563	1	1	1	1	1	1	1	1	1	1	1	1	1	1	1	1	1	1	1	1	1	1	1	1	1
MB-5546	1	1	1	1	1	1	1	1	1	1	1	1	1	1	1	1	1	1	1	1	1	1	1	1	1
MB-5513	2	3	3	3	2	2	2	2	2	2	2	2	2	2	2	2	3	2	3	3	2	2	2	3	2
MB-5656	1	4	4	4	1	1	1	1	1	1	1	1	1	1	1	1	1	4	1	4	1	1	1	4	1
MB-5530	1	1	1	1	1	1	1	1	1	1	2	2	1	1	1	1	3	2	2	1	1	1	2	2	2
MB-5553	1	2	1	1	2	2	1	1	2	2	2	1	2	1	2	1	1	1	2	1	2	1	2	1	1
MB-4836	3	2	3	3	3	3	3	3	3	2	1	2	2	2	3	3	3	2	2	3	3	3	2	3	2
MB-4828	2	2	2	2	2	2	2	2	2	2	2	2	2	2	2	2	1	2	2	2	2	2	2	2	2
MB-4679	5	5	5	5	5	5	5	5	5	5	5	5	5	5	5	5	5	5	5	5	5	5	5	5	5
MB-4033	1	1	1	1	1	1	1	1	1	1	1	1	1	1	1	1	1	1	1	1	1	1	1	1	1
MB-4692	1	1	1	1	1	1	1	1	2	1	1	1	1	1	1	1	1	3	1	1	3	1	1	1	1
MB-4675	1	1	1	1	1	1	1	1	1	1	1	1	1	1	1	1	1	1	1	1	1	1	1	1	1
MB-4653	INC	4	4	4	4	4	4	1	4	1	1	1	1	4	1	1	1	4	1	4	1	4	1	4	1
MB-4663	5	5	5	5	5	5	5	5	5	5	3	5	5	5	5	5	3	5	5	5	3	5	3	5	3
MB-4660	5	5	5	5	5	5	5	5	5	5	5	5	5	5	5	5	5	4	5	5	5	5	5	5	5
MB-5275	1	2	2	2	1	1	1	1	1	1	2	2	1	2	1	1	1	3	1	2	3	1	2	2	1
MB-4654	2	2	2	2	2	2	2	2	2	1	2	2	2	2	2	2	1	2	2	2	2	2	2	2	2
MB-2618	2	2	2	2	2	2	2	2	2	2	2	2	2	2	2	2	2	2	2	2	2	2	2	2	2
MB-2718	5	5	5	5	5	5	5	5	5	5	5	5	5	5	5	5	5	5	5	5	5	5	5	5	5
MB-2643	5	3	4	4	5	5	5	5	5	5	4	5	5	5	5	3	1	5	3	4	4	5	3	4	5
MB-2629	2	2	2	2	2	2	2	2	2	1	2	2	2	2	2	2	2	2	2	2	1	2	2	1	2
MB-2645	2	2	2	2	2	2	2	2	2	2	2	2	2	2	2	2	3	2	2	2	2	2	2	5	2
MB-2626	1	1	2	2	1	1	1	1	1	1	4	1	1	1	1	1	1	1	1	2	1	1	1	3	1
MB-6263	1	1	1	1	1	1	1	1	1	1	1	1	1	1	1	1	1	1	1	1	1	1	1	1	1
MB-6305	5	5	5	5	5	5	5	5	5	5	5	5	5	5	5	5	5	5	5	5	5	5	5	5	5
MB-6185	1	1	1	1	1	1	1	1	1	1	1	1	1	1	1	1	1	4	1	1	1	1	1	1	1
MB-6187	4	4	4	4	4	4	4	4	4	4	4	4	4	4	4	4	4	4	4	4	4	4	4	4	4
MB-6248	5	5	5	5	5	5	5	5	5	5	5	5	5	5	5	5	5	5	5	5	5	5	5	5	5
MB-6330	3	3	3	3	3	4	3	3	3	1	1	3	3	3	3	1	1	3	4	3	3	3	3	4	3
MB-6184	2	2	2	2	2	2	2	2	2	2	2	2	2	2	2	2	2	2	2	2	2	2	2	2	2
MB-6329	2	2	2	2	2	2	2	2	2	2	2	2	2	2	2	2	2	2	2	2	2	2	2	2	2
MB-6283	1	1	1	1	1	1	1	1	1	1	1	1	1	1	1	1	1	1	1	1	2	1	1	1	1
MB-6359	1	1	2	2	1	1	1	1	1	2	1	2	2	1	1	1	1	1	1	2	1	1	1	1	1
MB-6337	3	3	3	3	3	3	3	3	3	5	3	3	3	3	3	3	3	3	3	3	3	3	3	5	3
MB-6256	1	1	1	1	1	1	1	1	1	1	1	1	1	1	1	1	1	1	1	1	1	1	1	1	4
MB-6201	1	1	1	1	1	1	1	1	1	1	1	1	1	1	1	1	1	1	1	1	1	1	1	1	1
MB-6207	1	1	1	1	1	1	1	1	1	1	1	1	1	1	1	1	1	1	1	1	1	1	1	1	1
MB-6194	1	4	1	1	4	1	1	1	1	1	4	4	1	1	1	1	1	1	4	1	1	1	1	1	4
MB-6281	1	1	1	1	2	2	2	2	2	2	1	1	2	2	2	1	1	1	1	1	1	2	1	2	1
MB-6322	2	2	1	1	1	2	2	2	1	1	2	2	2	2	2	1	1	2	1	1	1	2	1	2	2
MB-6223	3	5	5	5	5	5	3	3	3	3	3	3	3	3	2	3	3	5	5	5	3	3	3	2	3
MB-6190	1	1	1	1	1	1	1	1	1	1	1	1	1	1	1	1	1	1	1	1	1	1	1	1	1
MB-6306	2	2	2	2	1	2	2	2	2	2	2	2	2	2	2	2	1	1	2	2	2	2	2	2	1
MB-6188	5	5	5	5	5	5	5	5	5	5	5	5	5	5	5	5	5	5	5	5	5	5	5	5	5
MB-6318	3	3	3	3	3	3	3	3	5	2	3	3	3	3	2	3	3	3	5	3	3	3	3	5	3
MB-6228	4	4	4	4	5	4	4	4	4	4	5	4	4	5	5	1	1	4	5	4	5	4	4	4	4
MB-6226	1	2	1	1	4	1	1	1	1	1	1	1	1	1	1	2	2	1	2	1	1	1	1	2	2
MB-6225	1	1	1	1	1	1	1	1	1	1	1	1	1	1	1	1	1	1	1	1	1	1	1	1	1
MB-6280	5	5	5	5	5	5	5	5	5	5	5	5	5	5	5	5	5	5	5	5	5	5	5	5	5
MB-6253	1	1	1	1	1	1	1	1	1	1	1	1	1	1	1	1	1	1	1	1	1	1	1	1	1
MB-6098	5	5	5	5	5	5	5	5	5	5	5	5	5	5	5	5	5	5	5	5	5	5	5	5	5
MB-6017	1	1	1	1	1	1	1	1	1	1	1	1	1	1	1	1	1	1	1	1	1	1	1	1	1
MB-6019	1	4	4	4	4	4	1	1	1	1	1	1	1	1	1	1	1	1	4	4	1	1	1	2	1
MB-6163	1	1	1	1	1	1	1	1	1	1	1	1	1	1	1	1	1	1	1	1	1	1	1	1	1
MB-6157	1	3	3	3	1	1	1	1	2	1	2	1	1	1	1	1	2	1	1	3	1	1	1	4	1
MB-6179	1	2	2	2	1	1	1	1	1	1	1	2	2	1	1	1	1	1	1	2	1	1	1	1	1
MB-6105	1	2	2	2	1	1	1	1	1	1	1	1	1	1	1	1	1	1	1	2	2	1	1	2	1
MB-6047	2	2	2	2	2	2	2	2	2	2	2	2	2	2	2	2	2	2	2	2	2	2	2	2	2
MB-6001	1	1	1	1	1	1	1	1	1	1	1	1	1	1	1	1	1	1	1	1	1	1	1	2	1
MB-6050	1	1	1	1	1	1	1	1	1	1	1	1	1	1	1	1	1	1	1	1	1	1	1	1	1
MB-6169	3	3	3	3	3	3	3	3	2	1	1	3	5	3	1	3	3	5	3	3	3	3	3	5	3
MB-4548	3	3	3	3	3	3	3	3	3	2	5	4	5	3	3	5	1	3	5	3	5	3	3	3	5
MB-4564	1	1	1	1	1	1	1	1	1	1	1	1	1	1	1	1	1	1	1	1	1	1	1	1	1
MB-4591	2	2	2	2	2	2	2	2	1	2	2	2	2	2	2	2	2	2	2	2	2	2	2	1	2
MB-4557	1	1	1	1	1	1	1	1	1	1	1	1	1	1	1	1	1	1	1	1	1	1	1	1	1
MB-4601	3	3	3	3	5	3	3	3	3	3	3	3	3	3	3	3	3	3	3	3	3	3	3	3	3
MB-4598	2	2	2	2	2	2	2	2	2	2	2	2	2	2	2	2	2	2	2	2	2	2	2	2	2
MB-4578	1	1	1	1	1	1	1	1	1	1	1	1	1	1	1	1	1	1	1	1	1	1	1	1	1
MB-4593	1	1	1	1	1	1	1	1	1	1	1	1	1	1	1	1	1	1	1	1	1	1	1	1	1
MB-5186	1	1	1	1	1	1	1	1	1	1	1	1	1	1	1	1	2	1	1	1	1	1	1	1	1
MB-4974	5	5	5	5	5	5	5	5	5	5	5	5	5	5	5	5	5	5	5	5	5	5	5	5	5
MB-4978	4	4	4	4	4	4	4	4	1	1	4	4	1	4	4	4	1	1	4	4	4	4	1	4	1
MB-5086	1	1	1	1	1	1	1	1	1	1	1	1	1	1	1	1	1	1	1	1	1	1	1	1	1
MB-5150	1	1	1	1	1	1	1	1	1	1	1	1	1	1	1	1	1	1	1	1	1	1	1	1	1
MB-5345	1	1	1	1	1	1	1	1	1	1	1	1	1	1	1	1	1	1	4	1	1	1	1	1	4
MB-4696	5	5	5	5	5	5	5	5	5	2	5	5	5	5	5	5	5	5	5	5	5	5	5	5	5
MB-4695	1	4	1	1	4	1	1	1	4	1	4	1	1	1	1	1	1	4	1	1	4	1	1	4	1
MB-4714	5	5	5	5	5	5	5	5	5	5	5	5	5	5	5	5	5	5	5	5	5	5	5	5	5
MB-4705	1	1	4	4	1	1	1	1	1	1	1	1	1	1	1	1	1	1	1	4	1	1	1	1	1
MB-4882	1	1	1	1	1	1	1	1	1	1	1	1	1	1	1	1	1	1	1	1	1	1	1	1	1
MB-4879	3	3	3	3	3	3	3	3	3	3	3	3	3	3	3	3	3	3	5	3	3	3	3	3	3
MB-4881	5	5	5	5	5	5	5	5	5	5	5	5	5	5	5	5	5	5	5	5	5	5	5	5	5
MB-4846	2	2	2	2	2	2	2	2	2	2	2	2	2	2	2	2	2	2	2	2	2	2	2	2	2
MB-4870	1	1	1	1	1	1	1	1	1	1	1	1	1	1	1	1	1	1	1	1	1	1	1	1	1
MB-4845	1	1	1	1	1	1	1	1	1	1	1	1	1	1	1	1	1	1	1	1	1	1	1	1	1
MB-4904	3	3	3	3	3	3	3	3	3	3	3	3	3	3	3	3	2	3	3	3	3	3	3	3	3
MB-4865	5	5	5	5	5	5	5	5	5	5	5	5	5	5	5	5	5	5	5	5	5	5	5	5	5
MB-4876	2	2	2	2	4	2	2	2	2	2	2	2	2	3	2	1	1	2	1	2	4	2	2	2	1
MB-4860	1	1	1	1	1	1	1	1	1	1	1	1	1	1	1	1	1	1	1	1	4	1	1	1	1
MB-5081	1	1	1	1	1	1	1	1	1	1	1	1	1	1	1	1	1	1	4	1	1	1	1	1	1
MB-4897	4	4	4	4	4	4	4	4	4	4	4	4	4	4	4	4	4	1	4	4	4	4	4	4	1
MB-4925	1	1	1	1	1	1	1	1	1	1	1	1	1	1	1	1	1	1	1	1	1	1	1	1	2
MB-4883	1	1	1	1	1	1	1	1	1	1	1	1	1	1	1	1	1	1	1	1	1	1	1	1	1
MB-4896	INC	3	3	3	5	5	5	3	5	5	3	3	4	3	1	4	2	5	5	3	4	5	3	5	3
MB-4987	1	1	1	1	1	1	1	1	1	1	4	1	1	1	1	1	1	1	1	1	4	1	1	1	1
MB-4416	5	5	5	5	5	5	5	5	5	5	5	5	5	5	5	5	5	5	5	5	5	5	5	5	5
MB-4374	1	1	1	1	1	1	1	1	1	1	1	1	1	1	1	1	1	1	1	1	1	1	1	1	1
MB-4407	5	5	5	5	5	5	5	5	5	5	5	5	5	5	5	5	5	4	5	5	5	5	5	5	5
MB-5039	2	2	2	2	2	2	2	2	2	2	2	2	2	2	2	2	2	2	2	2	2	2	2	2	2
MB-4119	2	2	2	2	1	1	1	2	2	2	1	2	1	2	1	2	1	3	1	2	1	1	2	2	2
MB-4091	1	1	1	1	1	1	1	1	1	1	1	1	1	1	1	1	1	1	1	1	1	1	1	1	1
MB-5079	1	1	1	1	1	1	1	1	1	1	1	1	1	1	1	1	1	1	1	1	1	1	1	1	1
MB-5073	1	1	1	1	1	1	1	1	1	1	1	1	1	1	1	1	1	1	1	1	1	1	1	1	1
MB-5105	1	1	1	1	1	1	1	1	1	1	1	1	1	1	1	1	1	1	1	1	1	1	1	1	1
MB-4254	5	5	5	5	5	5	5	5	5	5	5	5	5	5	5	5	5	5	5	5	5	5	5	5	5
MB-5174	3	3	3	3	3	3	3	3	3	3	3	2	3	3	3	2	1	3	1	3	3	3	3	3	2
MB-4742	1	1	1	1	1	1	1	1	1	1	1	1	1	1	1	1	1	1	1	1	1	1	1	1	1
MB-5239	2	2	2	2	2	2	1	1	2	2	2	2	2	1	1	1	1	2	2	2	2	1	2	2	2
MB-5251	1	1	1	1	1	1	1	1	1	1	1	1	1	1	1	1	1	1	1	1	1	1	1	1	1
MB-4996	1	1	1	1	1	1	1	1	1	1	1	1	1	1	1	1	1	1	1	1	1	1	1	1	1
MB-4282	1	1	1	1	1	1	1	1	1	1	1	1	1	1	1	1	1	1	1	1	1	1	1	4	2
MB-4603	1	1	1	1	1	1	1	1	1	1	1	1	1	1	1	1	1	1	1	1	1	1	1	1	1
MB-4621	5	5	5	5	5	5	5	5	5	5	5	5	5	5	5	5	5	5	5	5	5	5	5	5	5
MB-4853	1	1	1	1	1	1	1	1	1	1	1	1	1	1	1	1	1	1	1	1	1	1	1	1	1
MB-4362	1	4	1	1	1	1	1	1	1	1	1	1	1	1	1	1	1	1	1	1	1	1	1	4	1
MB-4602	2	2	2	2	2	2	2	2	2	2	2	2	2	2	2	2	2	2	2	2	2	2	2	2	2
MB-4222	3	3	2	2	3	3	3	3	3	3	2	1	3	1	1	1	1	3	1	2	3	3	3	3	1
MB-4893	5	5	5	5	5	5	5	5	5	5	5	5	5	5	5	5	5	5	5	5	5	5	5	5	5
MB-4859	4	4	4	4	4	4	4	4	4	1	4	4	4	1	1	4	1	4	4	4	4	4	1	4	5
MB-4212	1	1	1	1	1	1	1	1	1	1	1	1	1	1	1	1	1	1	1	1	1	1	1	1	1
MB-4873	1	2	1	1	1	1	1	1	1	2	2	1	1	1	1	2	2	2	1	1	1	1	2	2	1
MB-4942	5	5	5	5	5	5	5	5	5	5	5	5	5	5	5	5	5	5	5	5	5	5	5	5	5
MB-4949	2	2	2	2	2	2	2	2	2	2	1	2	2	2	2	2	2	2	2	2	2	2	2	2	2
MB-4928	3	3	3	3	2	3	2	2	3	3	4	3	3	4	2	3	2	3	3	3	3	2	3	3	3
MB-5098	1	1	1	1	1	1	1	1	1	1	1	1	1	1	4	1	1	1	1	1	1	1	1	1	1
MB-5313	2	2	2	2	1	2	2	2	2	1	4	1	1	1	1	2	2	2	2	2	1	2	1	1	1
MB-4145	1	2	1	1	2	1	1	1	1	1	1	1	1	1	1	1	1	1	1	1	1	1	1	1	2
MB-5122	1	1	1	1	1	1	1	1	1	1	1	1	1	1	1	1	1	1	2	1	1	1	1	1	1
MB-5278	1	4	4	4	4	1	1	1	4	4	4	1	1	1	1	1	1	1	1	4	4	1	1	4	1
MB-4213	1	1	1	1	1	1	1	1	2	2	2	1	1	1	1	1	1	1	2	1	2	1	1	2	2
MB-4126	3	3	3	3	3	1	3	3	3	1	1	1	3	1	3	1	1	4	3	3	1	3	1	3	1
MB-4957	2	2	2	2	2	2	2	2	2	2	2	2	2	2	2	2	1	2	2	2	2	2	2	2	2
MB-5470	1	2	2	2	1	2	1	1	3	1	1	1	1	4	1	1	2	1	4	2	1	1	2	1	1
MB-5317	2	2	2	2	2	2	1	1	2	1	2	2	2	2	1	2	1	2	2	2	1	1	2	2	2
MB-5308	4	4	4	4	4	4	4	4	1	1	4	1	1	1	1	4	1	4	1	4	4	4	1	4	1
MB-4976	1	1	1	1	1	1	1	1	1	1	1	1	1	1	1	1	1	1	1	1	1	1	1	1	1
MB-5277	1	4	1	1	1	1	1	1	1	1	1	1	1	1	1	1	1	1	1	1	1	1	1	1	1
MB-5110	1	4	4	4	1	4	1	4	4	4	1	1	1	4	1	1	1	1	1	4	1	1	1	1	1
MB-4046	INC	2	2	2	1	1	1	1	3	1	3	2	3	3	1	2	1	3	1	2	3	1	1	1	2
MB-4012	3	3	3	3	3	3	3	3	3	3	3	3	3	3	3	3	1	3	3	3	1	3	1	3	3
MB-4141	INC	2	2	2	3	3	1	1	3	2	1	2	1	2	1	2	1	1	1	2	2	1	1	2	2
MB-4001	1	1	1	1	1	1	1	1	1	1	1	1	1	1	1	1	1	1	1	1	1	1	1	1	1
MB-4792	5	5	5	5	5	5	5	5	5	5	5	5	5	5	5	5	5	5	5	5	5	5	5	5	5
MB-4738	1	4	4	4	1	1	1	1	4	1	1	1	1	1	1	1	1	4	4	4	1	1	4	4	4
MB-4264	1	2	2	2	1	1	1	1	1	1	2	2	1	4	1	1	1	1	1	2	1	1	1	2	1
MB-4794	1	1	1	1	1	1	1	1	1	1	1	1	1	1	1	1	1	1	1	1	1	1	1	1	1
MB-4782	4	4	4	4	4	4	4	4	4	4	4	4	4	4	4	4	4	4	4	4	4	4	4	4	4
MB-5008	3	3	3	3	3	3	3	3	3	2	3	3	3	3	3	3	3	3	3	3	3	3	3	3	3
MB-4426	INC	3	2	2	3	3	3	1	3	3	1	1	3	1	3	2	1	4	1	2	3	3	1	1	1
MB-4390	1	1	1	1	1	1	1	1	1	1	1	1	1	1	1	1	1	1	1	1	1	1	1	1	1
MB-4434	INC	2	2	2	1	1	1	1	2	1	3	2	1	3	1	2	1	2	1	2	3	1	1	2	2
MB-4368	1	1	1	1	1	1	1	1	1	1	1	1	1	1	1	1	1	2	1	1	1	1	1	1	1
MB-4442	1	1	1	1	1	1	1	1	1	1	1	1	1	1	1	1	1	4	1	1	1	1	1	4	1
MB-4418	1	1	1	1	1	1	1	1	1	1	2	1	1	1	1	1	1	1	1	1	1	1	1	2	1
MB-4381	1	1	1	1	3	1	1	1	1	1	1	1	1	1	1	1	1	1	1	1	1	1	1	4	1
MB-4395	2	2	2	2	2	2	2	2	2	2	2	2	2	2	2	2	2	2	2	2	2	2	2	3	2
MB-4630	2	2	2	2	2	2	2	2	2	2	2	2	2	2	2	2	2	2	2	2	2	2	2	2	2
MB-6010	2	2	2	2	3	2	2	2	2	2	2	2	2	2	2	2	2	2	2	2	2	2	2	2	2
MB-6021	1	1	1	1	1	1	1	1	1	1	1	1	1	1	1	1	1	1	1	1	1	1	1	1	1
MB-6059	1	1	1	1	1	1	1	1	1	1	1	1	1	1	1	1	1	4	1	1	1	1	1	4	1
MB-6154	2	2	2	2	1	2	2	1	2	2	2	2	2	2	1	2	2	2	1	2	1	2	2	2	2
MB-6097	1	2	2	2	1	1	1	1	1	1	1	1	1	2	1	1	1	3	2	2	3	1	1	3	1
MB-6107	1	3	4	4	1	1	1	1	1	1	1	2	1	1	1	1	3	1	1	4	1	1	1	1	1
MB-6023	1	1	4	4	1	1	1	1	1	1	2	1	4	1	1	1	1	1	1	4	1	1	1	4	1
MB-6152	3	3	3	3	5	5	5	5	3	3	3	3	3	3	3	3	3	3	5	3	3	5	3	5	3
MB-6018	1	1	1	1	1	1	1	1	1	1	1	1	1	1	1	1	1	1	1	1	1	1	1	1	1
MB-6082	1	1	4	4	1	1	1	1	1	4	1	1	1	1	1	1	1	1	1	4	1	1	1	1	1
MB-6029	1	1	1	1	1	1	1	1	1	1	1	1	1	1	1	1	1	1	1	1	1	1	1	1	1
MB-5295	5	5	5	5	5	5	5	5	5	5	5	5	5	5	5	5	5	5	5	5	5	5	5	5	5
MB-5386	1	2	2	2	2	1	1	1	1	1	1	1	1	1	1	1	2	2	2	2	1	1	1	2	1
MB-5092	1	1	1	1	1	1	1	1	1	1	1	1	1	1	1	1	1	1	1	1	1	1	1	1	1
MB-6068	5	5	5	5	5	5	5	5	5	5	5	5	5	5	5	5	5	5	5	5	5	5	5	5	5
MB-6039	2	2	2	2	2	2	2	2	2	2	2	2	2	2	2	2	1	2	2	2	2	2	2	2	2
MB-6022	2	2	2	2	2	2	2	2	2	1	2	2	1	2	2	2	1	2	2	2	2	2	2	2	2
MB-6125	1	1	1	1	1	1	1	1	1	1	1	1	1	1	1	1	1	1	1	1	1	1	1	1	4
MB-6053	2	2	2	2	1	2	2	2	1	1	2	1	2	1	2	2	2	1	2	2	2	2	1	2	1
MB-6135	2	2	2	2	2	2	2	2	2	2	2	2	2	2	2	2	2	2	2	2	2	2	2	2	2
MB-6042	1	1	1	1	1	1	1	1	1	1	1	1	1	1	1	1	1	1	1	1	1	1	1	1	1
MB-6058	5	5	5	5	5	5	5	5	5	5	5	5	5	5	5	5	5	5	5	5	5	5	5	5	5
MB-6052	4	4	4	4	4	4	4	4	4	4	4	4	4	4	5	4	1	4	4	4	4	4	4	1	5
MB-5368	1	1	1	1	1	1	1	1	1	1	1	1	1	1	1	1	1	4	1	1	1	1	1	1	1
MB-4189	3	3	3	3	3	3	3	3	1	3	3	2	3	2	3	2	1	3	1	3	3	3	3	5	2
MB-5335	5	5	5	5	5	5	5	5	5	5	5	5	5	5	5	5	5	5	5	5	5	5	5	5	5
MB-4008	2	2	2	2	2	2	2	2	2	2	1	2	2	2	2	2	1	2	2	2	2	2	2	1	1
MB-5134	1	1	1	1	1	1	1	1	1	1	1	1	1	1	1	1	1	1	1	1	1	1	1	1	1
MB-4139	2	2	2	2	2	2	2	2	2	2	2	2	2	2	2	2	2	2	2	2	2	2	2	2	2
MB-5130	1	1	4	4	1	1	1	1	1	1	1	1	1	1	4	1	1	1	1	4	4	1	1	1	1
MB-5135	5	5	5	5	5	5	5	5	5	5	5	5	5	5	5	5	5	5	5	5	5	5	5	5	5
MB-4880	5	5	5	5	5	5	5	5	5	5	5	5	5	5	5	5	5	5	5	5	5	5	5	5	5
MB-5054	INC	3	3	3	4	4	4	4	3	3	4	3	5	4	4	3	3	5	4	3	5	4	3	4	3
MB-5057	5	5	5	5	5	5	5	5	5	5	5	5	5	5	5	5	5	5	5	5	5	5	5	5	5
MB-4098	1	1	1	1	3	1	1	1	1	2	1	1	1	1	3	1	1	1	1	1	1	1	1	1	1
MB-4760	1	1	1	1	1	1	1	1	1	1	1	1	1	1	1	1	1	1	1	1	1	1	1	1	1
MB-5102	5	5	5	5	5	5	5	5	5	5	5	5	5	5	3	5	5	5	5	5	5	5	5	5	5
MB-5420	INC	4	4	4	4	4	4	4	1	2	1	1	4	4	1	1	2	1	3	4	1	4	1	5	4
MB-5458	3	3	3	3	5	3	3	3	3	3	3	3	3	3	3	3	2	5	3	3	4	3	3	2	3
MB-5492	1	1	1	1	1	1	1	1	1	1	1	1	1	1	1	1	1	1	1	1	1	1	1	1	1
MB-5407	1	1	1	1	1	1	1	1	1	1	1	1	1	1	1	1	1	1	1	1	1	1	1	1	1
MB-5394	3	3	3	3	3	3	3	3	3	3	3	3	3	3	3	3	3	3	3	3	3	3	3	3	3
MB-5410	1	1	1	1	1	1	1	1	1	1	1	1	1	1	1	1	1	1	1	1	1	1	1	1	1
MB-5435	2	2	2	2	2	2	2	2	1	1	2	2	2	1	2	1	2	2	1	2	2	2	2	1	1
MB-5406	2	2	2	2	2	2	2	2	2	2	2	2	2	2	2	2	1	2	2	2	2	2	2	2	2
MB-4329	1	1	1	1	1	1	1	1	1	1	1	1	1	1	1	1	1	1	1	1	1	1	1	2	1
MB-4005	2	2	2	2	2	2	2	2	1	2	1	2	2	2	2	2	2	2	1	2	2	2	2	2	1
MB-6288	1	2	2	2	1	2	1	1	2	1	2	1	1	1	1	1	2	2	1	2	1	1	1	2	2
MB-6272	5	5	5	5	5	5	5	5	5	5	5	5	5	5	5	5	5	5	5	5	5	5	5	5	5
MB-6218	1	1	1	1	1	1	1	1	1	1	1	1	1	1	1	1	1	1	1	1	1	1	1	1	1
MB-6246	3	3	3	3	2	3	3	3	3	3	3	3	3	3	3	3	2	3	3	3	3	3	2	2	3
MB-6217	2	2	2	2	2	2	2	2	1	2	2	2	2	2	2	2	1	2	2	2	2	2	2	2	2
MB-6206	1	1	1	1	1	1	1	1	1	1	1	1	1	1	1	1	1	1	1	1	1	1	1	1	1
MB-6308	1	1	1	1	1	1	1	1	1	1	1	1	1	1	1	1	1	1	1	1	1	1	1	1	1
MB-6271	1	1	1	1	1	1	1	1	1	1	1	1	1	1	1	1	1	1	1	1	1	1	1	1	1
MB-6245	5	5	5	5	5	5	5	5	5	5	5	5	5	5	5	5	5	5	5	5	5	5	5	4	5
MB-6233	1	1	1	1	1	2	1	1	2	2	2	2	2	2	1	1	1	2	1	1	2	1	1	2	2
MB-4343	3	3	3	3	3	3	3	3	1	3	1	2	3	3	3	1	2	3	1	3	1	3	1	3	2
MB-4281	2	3	3	3	3	3	3	2	2	2	2	2	2	2	2	2	2	3	2	3	2	3	2	2	2
MB-4283	1	1	1	1	1	1	1	1	1	1	1	1	1	1	1	1	1	1	1	1	1	1	1	1	1
MB-4341	3	3	3	3	3	3	3	3	3	3	3	3	3	3	3	3	3	3	3	3	3	3	3	3	3
MB-4303	3	3	3	3	3	3	3	3	3	3	5	5	3	5	3	4	3	3	5	3	5	3	3	4	3
MB-4274	1	1	1	1	1	1	1	1	1	1	1	1	1	1	1	1	1	1	1	1	1	1	1	2	1
MB-4292	1	1	1	1	1	1	1	1	1	1	1	1	1	1	1	1	1	1	1	1	1	1	1	1	1
MB-4278	2	2	2	2	1	1	1	1	1	2	2	2	3	3	1	2	1	2	2	2	2	1	2	2	2
MB-5399	1	1	1	1	1	1	1	1	1	1	1	1	1	1	1	1	1	1	1	1	1	1	1	1	1
MB-5364	1	4	1	1	1	1	1	1	1	1	1	1	1	1	1	1	1	1	1	1	1	1	1	1	1
MB-3526	1	4	4	4	4	4	1	1	1	1	1	1	4	1	1	1	1	4	1	4	1	1	1	1	1
MB-6138	1	1	1	1	1	1	1	1	2	2	1	1	1	1	1	1	1	1	1	1	1	1	1	1	1
MB-6049	2	2	2	2	2	2	2	2	2	1	2	2	2	2	2	2	2	2	2	2	2	2	2	2	2
MB-6055	5	5	5	5	5	5	5	5	5	5	5	5	5	5	5	5	5	3	5	5	5	5	5	5	5
MB-6108	1	1	4	4	1	1	1	1	1	1	3	1	1	1	1	1	1	1	1	4	1	1	1	1	1
MB-6044	INC	1	3	3	3	4	4	1	1	1	1	4	1	1	3	1	3	2	4	3	1	4	1	3	4
MB-6181	1	1	1	1	1	1	1	1	1	1	1	1	1	1	1	1	1	1	1	1	1	1	1	1	1
MB-6100	3	3	3	3	3	3	3	3	3	3	3	3	3	3	3	3	3	3	3	3	3	3	3	3	3
MB-6085	3	3	3	3	3	3	3	3	3	3	3	3	3	3	5	3	3	5	3	3	3	3	3	5	3
MB-6113	1	3	4	4	1	1	1	1	1	1	2	1	1	4	1	1	3	1	2	4	1	1	1	1	4
MB-6079	1	1	1	1	1	1	1	1	1	2	1	1	1	1	2	1	1	2	1	1	1	1	1	2	2
MB-6103	1	1	1	1	1	1	1	1	1	1	4	1	1	4	1	1	1	1	1	1	4	1	1	1	1
MB-6016	1	1	1	1	1	1	1	1	1	1	1	1	1	1	1	1	1	1	1	1	1	1	1	1	1
MB-6149	1	2	2	2	1	1	1	1	1	1	1	1	1	1	1	1	1	4	1	2	1	1	1	1	1
MB-6131	3	3	3	3	3	3	3	3	3	2	3	3	3	3	3	3	2	3	3	3	3	3	3	3	3
MB-6007	INC	3	2	2	1	1	1	1	1	1	1	1	2	1	1	2	2	3	1	2	2	1	2	2	2
MB-6147	4	4	4	4	4	4	4	4	4	1	4	4	4	4	4	4	4	4	4	4	4	4	1	4	1
MB-6114	3	3	3	3	1	3	3	3	3	3	1	1	1	3	1	3	3	3	3	3	2	3	1	1	2
MB-6167	1	1	1	1	1	1	1	1	1	1	1	1	1	1	1	1	1	1	2	1	1	1	1	1	1
MB-6146	2	2	2	2	2	3	2	2	3	2	2	2	2	2	2	2	2	2	2	2	1	2	2	2	2
MB-6092	1	1	1	1	1	1	1	1	1	1	1	1	1	1	1	1	1	1	1	1	1	1	1	4	1
MB-6160	3	3	3	3	2	3	3	3	3	3	3	3	3	3	3	3	3	3	3	3	3	3	3	3	3
MB-6075	2	2	2	2	2	2	2	2	2	2	2	2	2	2	2	2	2	2	2	2	2	2	2	2	2
MB-6011	2	2	2	2	2	2	2	2	2	2	2	2	2	2	2	2	2	2	2	2	2	2	2	2	2
MB-6071	1	1	1	1	1	1	1	1	1	1	1	1	1	1	1	1	1	1	1	1	1	1	1	1	1
MB-6214	1	1	1	1	1	1	1	1	1	1	1	1	1	1	1	1	1	1	1	1	1	1	1	1	1
MB-6334	2	2	2	2	2	2	2	2	2	1	1	2	1	2	1	2	1	2	3	2	1	2	2	1	2
MB-6346	1	2	2	2	1	1	1	1	1	1	1	1	1	1	1	1	1	1	2	2	1	1	1	2	1
MB-6319	1	1	1	1	1	1	1	1	1	1	3	1	1	1	1	1	1	1	1	1	2	1	1	1	1
MB-6200	1	1	1	1	1	1	1	1	1	1	1	1	2	1	1	1	2	1	1	1	1	1	1	1	1
MB-6336	5	5	5	5	5	5	5	5	5	5	5	5	5	5	5	5	5	5	5	5	5	5	5	5	5
MB-6211	1	1	1	1	1	1	1	1	1	1	1	1	1	1	1	1	1	1	1	1	1	1	1	1	1
MB-6232	1	1	1	1	1	1	1	1	1	1	1	1	1	1	1	1	1	1	1	1	1	1	1	1	1
MB-6234	1	4	4	4	1	1	1	1	1	1	1	1	1	1	1	1	1	1	1	4	1	1	1	1	1
MB-6300	1	1	1	1	1	1	1	1	2	1	1	1	1	1	1	1	1	1	1	1	1	1	1	1	1
MB-5533	1	1	1	1	1	1	1	1	1	1	1	1	1	1	1	1	4	1	1	1	1	1	1	1	1
MB-5543	1	1	4	4	1	1	1	1	1	1	1	2	1	1	1	1	1	1	1	4	1	1	1	1	1
MB-4236	1	1	2	2	1	1	1	1	2	1	3	1	1	2	1	1	1	1	1	2	3	1	1	2	1
MB-4234	1	1	1	1	1	1	1	1	1	1	1	1	1	1	1	1	1	1	1	1	1	1	1	1	1
MB-4270	2	2	3	3	3	2	3	2	2	2	2	2	2	2	3	2	2	2	2	3	2	3	2	2	2
MB-4235	5	5	5	5	5	5	5	5	5	3	4	1	1	5	5	5	3	1	5	5	1	5	4	4	4
MB-4250	1	1	1	1	1	1	1	1	1	1	1	1	1	1	1	1	1	1	1	1	1	1	1	1	1
MB-5467	1	4	4	4	4	4	4	4	1	1	1	1	1	1	4	1	1	1	1	4	1	4	1	1	1
MB-4323	1	1	2	2	1	1	1	1	1	1	1	1	1	1	1	2	1	1	1	2	1	1	1	1	1
MB-4318	2	2	2	2	2	2	2	2	2	2	2	2	2	2	2	2	2	2	2	2	2	2	2	2	2
MB-4333	1	1	4	4	1	1	1	1	1	1	1	1	1	1	1	1	1	1	1	4	1	1	1	1	1
MB-4339	2	2	2	2	2	2	2	2	2	2	3	2	2	2	2	2	1	2	2	2	3	2	2	2	2
MB-4322	1	1	1	1	1	1	1	1	1	1	1	1	1	1	1	1	1	1	1	1	1	1	1	1	1
MB-4351	3	3	3	3	3	3	3	3	3	2	3	3	3	3	3	3	2	3	4	3	3	3	3	3	3
MB-5063	3	3	3	3	3	3	3	3	3	3	3	3	3	3	3	3	3	3	3	3	3	3	3	3	3
MB-4360	3	5	3	3	3	3	3	3	3	3	3	3	3	3	3	5	1	4	4	3	3	3	5	3	5
MB-4375	1	4	1	1	1	1	1	1	1	1	1	1	1	1	1	1	1	4	1	1	1	1	1	1	4
MB-4798	1	1	1	1	1	1	1	1	1	1	4	1	1	1	1	1	4	1	1	1	4	1	1	1	1
MB-4746	1	2	1	1	1	1	1	1	1	1	1	1	1	1	1	1	1	1	1	1	2	1	1	1	1
MB-4838	2	2	2	2	2	2	2	2	2	2	2	2	2	2	2	2	1	2	2	2	1	2	2	2	2
MB-4829	1	2	2	2	1	1	1	1	1	1	1	1	1	1	1	1	1	1	1	2	1	1	1	2	1
MB-4802	2	2	2	2	1	1	2	2	2	2	2	2	2	2	1	2	2	2	2	2	2	2	2	2	2
MB-5426	5	5	3	3	5	5	5	5	5	5	1	5	3	4	5	5	3	5	5	3	3	5	5	5	3
MB-5444	1	1	1	1	1	1	1	1	1	1	1	1	1	1	1	1	1	1	1	1	1	1	1	1	1
MB-5431	5	5	5	5	5	5	5	5	5	5	3	4	1	5	5	4	5	2	2	5	4	5	5	5	4
MB-5447	2	2	2	2	2	2	2	2	2	2	1	2	2	2	2	2	2	2	2	2	2	2	2	2	2
MB-5434	1	2	2	2	1	1	2	2	1	1	2	1	1	1	1	1	1	1	1	2	2	2	2	1	1
MB-5255	4	4	4	4	5	4	4	4	4	4	4	4	4	4	5	4	1	4	4	4	4	4	4	1	5
MB-5231	3	3	3	3	3	3	3	3	3	1	3	3	3	3	3	3	2	3	3	3	3	3	3	3	3
MB-5208	5	5	5	5	4	5	5	5	5	5	5	5	5	5	4	5	5	5	5	5	5	5	5	5	5
MB-5428	1	1	1	1	1	1	1	1	1	1	1	1	1	1	1	1	1	1	1	1	1	1	1	1	1
MB-5440	5	5	5	5	5	5	5	5	5	5	5	5	5	5	5	5	5	5	5	5	5	5	5	5	5
MB-5425	1	1	1	1	1	1	1	1	1	1	1	1	1	1	1	1	1	1	1	1	1	1	1	1	1
MB-5298	5	5	5	5	5	5	5	5	5	5	5	5	5	5	5	5	5	5	5	5	5	5	5	5	5
MB-5334	1	1	1	1	1	1	1	1	1	1	1	1	1	1	1	1	1	1	1	1	1	1	1	1	2
MB-5326	1	1	1	1	4	1	1	1	1	1	1	1	1	1	1	1	1	1	1	1	1	1	1	1	1
MB-4059	1	1	1	1	4	1	1	1	1	1	1	1	1	1	1	1	1	1	1	1	1	1	1	1	1
MB-6230	1	1	1	1	1	1	1	1	1	1	1	1	1	1	1	1	1	1	1	1	1	1	1	1	1
MB-6150	1	2	1	1	1	1	1	1	1	1	1	1	2	1	1	1	1	2	2	1	2	1	1	1	2
MB-6014	4	4	4	4	4	4	4	4	1	1	4	4	1	1	1	1	1	4	1	4	4	4	4	4	4
MB-6145	2	2	2	2	2	2	2	2	2	2	2	2	2	2	2	2	2	2	2	2	2	2	2	2	2
MB-6012	1	1	1	1	1	1	1	1	1	1	1	1	1	1	1	1	1	1	1	1	2	1	1	1	1
MB-6024	1	1	1	1	1	1	1	1	1	1	1	1	1	1	1	1	1	1	1	1	1	1	1	1	1
MB-6124	1	1	1	1	1	1	1	1	1	1	1	1	1	1	1	1	1	1	1	1	1	1	1	1	1
MB-6171	1	1	1	1	1	1	1	1	1	1	1	1	1	1	1	1	1	1	1	1	1	1	1	1	1
MB-6060	2	2	2	2	2	2	2	2	2	2	2	2	2	2	2	2	2	2	2	2	2	2	2	2	2
MB-6008	2	2	2	2	2	2	2	2	2	2	2	2	2	2	2	2	2	2	2	2	2	2	2	2	2
MB-6036	5	5	5	5	5	5	5	5	5	5	5	5	5	5	5	5	5	5	5	5	5	5	5	3	5
MB-6144	5	5	5	5	5	5	5	5	5	5	5	5	5	5	5	5	5	5	5	5	5	5	5	5	5
MB-5346	5	5	5	5	5	5	5	5	5	5	5	5	5	5	5	5	5	5	5	5	5	5	5	5	5
MB-5373	1	1	1	1	2	1	2	2	1	1	2	1	1	1	2	1	1	1	2	1	2	2	1	1	2
MB-6178	5	5	5	5	5	5	5	5	5	5	5	5	5	5	5	5	5	5	5	5	5	5	5	5	5
MB-6063	INC	3	3	3	3	4	4	4	3	1	3	4	3	3	3	4	1	4	3	3	3	4	1	1	4
MB-6020	2	2	2	2	2	2	2	2	2	2	2	2	2	1	2	2	2	1	1	2	1	2	2	4	1
MB-6062	5	5	5	5	4	5	5	5	5	5	5	5	5	5	5	5	5	3	5	5	5	5	5	5	5
MB-6069	1	1	1	1	1	1	1	1	1	1	1	1	1	1	1	1	1	1	1	1	1	1	1	1	1
MB-6141	2	2	2	2	2	2	2	2	1	2	2	1	2	1	1	2	1	1	2	2	2	2	2	1	1
MB-6118	1	1	1	1	1	1	1	1	1	1	1	1	1	1	1	1	1	1	1	1	1	1	1	1	1
MB-6065	1	1	1	1	1	1	1	1	1	1	1	1	1	1	1	1	1	1	1	1	1	1	1	1	1
MB-6006	1	1	1	1	1	1	1	1	2	2	1	1	1	1	1	1	1	1	1	1	1	1	1	1	1
MB-6048	1	2	2	2	1	1	1	1	1	1	1	1	1	4	4	1	2	1	1	2	1	1	1	2	2
MB-6116	2	2	2	2	2	2	2	2	2	2	2	2	2	2	2	2	2	2	2	2	2	2	2	2	2
MB-4310	1	1	2	2	1	1	1	1	1	1	1	1	3	1	1	2	1	2	2	2	3	1	1	1	2
MB-4300	3	3	3	3	3	3	3	3	1	1	1	1	3	3	3	3	1	3	3	3	3	3	1	1	1
MB-4298	INC	2	2	2	1	1	1	2	2	2	2	1	2	2	1	1	2	3	1	2	1	1	1	2	1
MB-4417	5	5	5	5	5	5	5	5	5	5	5	5	5	5	5	5	5	5	5	5	5	5	5	5	5
MB-4079	2	2	2	2	2	3	2	3	3	2	3	2	3	2	1	2	1	3	1	2	3	2	3	2	2
MB-4317	3	3	3	3	3	3	3	3	2	2	3	2	3	2	3	3	2	2	1	3	3	3	2	3	2
MB-4350	3	3	3	3	3	3	3	3	3	3	5	4	3	3	3	3	1	4	5	3	5	3	3	3	5
MB-4332	5	5	5	5	5	5	5	5	5	5	5	5	5	5	4	5	5	5	5	5	5	5	5	5	5
MB-4324	2	2	2	2	2	2	2	2	2	2	2	2	2	2	2	2	1	2	2	2	2	2	2	2	1
MB-4306	1	1	1	1	1	1	1	1	1	1	1	1	1	1	1	1	1	1	1	1	1	1	1	1	1
MB-7226	2	2	2	2	2	2	2	2	2	2	2	2	2	2	2	2	2	2	2	2	2	2	2	2	2
MB-7205	5	5	5	5	5	5	5	5	5	5	5	5	5	5	5	5	5	5	5	5	5	5	5	5	5
MB-7160	3	3	3	3	5	3	3	1	1	3	3	2	2	3	1	3	2	3	3	3	3	3	3	5	2
MB-7159	5	5	5	5	5	5	5	5	5	5	5	5	5	5	5	5	5	5	5	5	5	5	5	5	5
MB-7167	1	1	1	1	1	1	1	1	2	2	1	2	2	1	1	1	2	2	2	1	1	1	1	2	1
MB-7207	3	3	3	3	3	3	3	3	3	3	3	3	3	3	3	3	2	2	3	3	3	3	3	3	3
MB-7241	1	1	1	1	1	1	1	1	2	1	1	1	1	1	1	1	1	1	1	1	1	1	1	1	1
MB-7236	1	1	1	1	1	1	1	1	1	2	1	1	1	1	1	1	1	1	1	1	1	1	1	1	1
MB-7168	1	1	1	1	1	1	1	1	1	1	1	1	1	1	1	1	1	1	1	1	1	1	1	1	1
MB-7162	1	1	1	1	1	1	1	1	1	1	1	1	1	1	1	1	1	1	1	1	1	1	1	1	1
MB-7235	1	1	1	1	1	1	1	1	1	1	1	1	1	1	1	1	1	1	1	1	1	1	1	2	1
MB-4331	2	2	2	2	2	2	2	2	2	2	2	2	2	2	2	2	2	2	2	2	2	2	2	2	2
MB-4353	2	2	2	2	2	2	2	2	2	2	2	2	2	1	1	2	2	2	1	2	2	2	1	2	2
MB-4354	3	3	3	3	3	3	3	3	1	1	3	3	1	3	3	1	1	3	3	3	3	3	1	1	3
MB-4328	1	1	1	1	1	1	1	1	2	1	2	1	1	1	1	1	1	1	1	1	2	1	1	2	1
MB-4348	3	3	3	3	3	3	3	2	2	3	2	2	2	3	3	3	1	2	2	3	2	3	2	3	2
MB-6030	1	1	1	1	1	1	1	1	1	1	1	1	1	1	1	1	1	1	1	1	1	1	1	1	1
MB-6133	1	1	1	1	1	1	1	1	1	2	1	1	1	1	1	1	1	1	1	1	1	1	1	2	1
MB-6083	1	1	1	1	1	1	1	1	1	1	1	1	1	1	1	1	1	1	1	1	1	1	1	1	1
MB-6026	2	2	2	2	2	2	2	2	2	2	2	2	2	2	2	2	2	2	2	2	2	2	2	2	2
MB-6168	1	1	1	1	1	1	1	1	1	1	1	1	1	1	1	1	1	1	1	1	1	1	1	1	1
MB-6101	1	2	4	4	1	1	4	4	1	1	3	1	1	1	1	1	3	1	1	4	1	4	4	4	1
MB-6156	2	2	3	3	2	2	2	3	1	1	2	2	2	2	2	2	2	2	2	3	3	2	2	3	2
MB-6051	1	1	1	1	1	1	1	1	1	1	1	1	1	1	1	1	1	1	1	1	1	1	1	1	1
MB-6182	3	3	3	3	3	3	3	3	3	3	3	3	3	3	3	3	2	3	3	3	3	3	3	2	3
MB-6080	2	2	2	2	2	2	2	2	2	3	1	2	2	2	2	2	2	2	1	2	2	2	2	1	2
MB-6143	5	5	5	5	5	5	5	5	5	5	5	5	5	5	5	5	5	5	5	5	5	5	5	5	5
MB-6164	INC	1	1	1	2	2	2	2	2	2	1	1	2	2	2	1	1	1	1	1	1	2	1	2	2
MB-0551	4	4	4	4	4	4	4	4	4	4	4	4	4	4	4	4	4	4	4	4	4	4	4	4	4
MB-0391	3	3	3	3	3	3	3	4	4	3	1	3	3	3	4	3	1	3	4	3	3	3	1	1	3
MB-0367	1	4	4	4	1	1	1	1	1	1	1	1	1	1	1	1	1	1	1	4	1	1	1	1	1
MB-5171	4	4	4	4	4	4	4	4	4	1	4	1	1	4	1	4	4	1	4	4	4	4	1	4	4
MB-5199	3	3	3	3	3	3	3	1	3	5	4	3	3	1	3	3	1	1	3	3	5	3	3	5	3
MB-5177	2	2	2	2	2	2	2	2	2	2	2	2	2	2	2	2	2	2	2	2	2	2	2	2	2
MB-5178	1	1	1	1	1	1	1	1	1	1	1	1	1	1	1	1	1	1	1	1	2	1	1	4	1
MB-5280	1	1	1	1	1	1	1	1	1	1	1	1	1	1	1	1	1	1	1	1	1	1	1	1	1
MB-5148	1	4	4	4	1	1	4	1	1	1	1	1	1	1	1	4	1	5	4	4	1	4	1	4	4
MB-4342	1	1	1	1	1	1	1	1	1	1	1	1	1	1	1	1	1	1	1	1	1	1	1	1	4
MB-5225	5	5	5	5	5	5	5	5	5	5	5	5	5	5	5	5	5	5	5	5	5	5	5	5	5
MB-4024	5	5	5	5	5	5	5	5	5	5	5	5	5	5	5	5	5	5	5	5	5	5	5	5	5
MB-6314	2	2	3	3	2	2	2	2	2	2	2	2	2	2	2	2	2	2	2	3	2	2	2	2	2
MB-6257	2	2	2	2	1	2	1	1	2	2	1	2	2	2	1	2	2	2	2	2	2	1	2	2	2
MB-6358	3	3	3	3	2	3	3	3	3	2	3	3	2	2	3	3	2	2	3	3	3	3	3	1	1
MB-6242	5	5	5	5	5	5	5	5	5	5	5	5	5	5	5	5	5	5	5	5	5	5	5	5	5
MB-6237	5	5	5	5	5	5	5	5	5	5	5	5	5	5	5	5	5	5	5	5	5	5	5	5	5
MB-6183	2	2	2	2	2	2	2	2	2	2	2	2	2	2	2	2	2	2	2	2	2	2	2	2	2
MB-6254	1	1	1	1	1	1	1	1	1	2	1	1	1	1	2	1	1	1	1	1	1	1	1	1	1
MB-6231	1	1	1	1	1	1	1	1	4	1	1	1	1	1	1	1	2	1	1	1	1	1	1	1	1
MB-6204	1	1	1	1	1	1	1	1	1	1	4	1	1	4	1	1	1	1	4	1	4	1	1	1	1
MB-6229	1	1	1	1	1	1	1	1	1	1	1	1	1	1	1	1	1	1	1	1	1	1	1	1	1
MB-5154	4	4	4	4	4	4	4	4	4	1	4	4	4	4	4	4	1	4	4	4	3	4	4	4	4
MB-5175	INC	4	4	4	5	1	1	1	1	4	3	1	1	4	5	1	3	1	2	4	4	1	1	1	4
MB-5173	5	5	5	5	5	5	5	5	5	5	5	5	5	5	5	5	5	5	5	5	5	5	5	5	5
MB-5162	INC	4	4	4	5	5	5	4	5	5	4	4	4	5	5	4	5	5	4	4	4	5	4	1	5
MB-5164	INC	4	4	4	4	4	1	1	1	1	1	1	1	4	4	1	1	4	3	4	1	1	1	4	4
MB-7253	2	2	2	2	2	2	2	2	2	2	2	2	2	2	2	2	2	2	2	2	2	2	2	1	2
MB-7298	2	2	2	2	2	2	2	2	2	2	2	2	2	2	2	2	2	2	2	2	2	2	2	1	2
MB-7299	2	2	2	2	2	2	2	2	2	2	2	2	2	2	2	2	1	2	2	2	2	2	2	2	2
MB-7293	1	1	1	1	1	1	1	1	1	1	1	1	1	1	1	1	1	1	1	1	1	1	1	1	1
MB-3978	3	3	3	3	3	3	3	3	3	2	3	3	3	3	3	3	2	5	3	3	3	3	3	3	1
MB-7288	2	2	2	2	2	2	2	2	2	2	2	2	2	2	2	2	2	2	2	2	2	2	2	3	2
MB-2923	3	3	3	3	3	3	2	3	3	2	3	3	3	3	3	3	2	3	3	3	3	2	3	3	3
MB-0402	4	4	4	4	1	4	4	4	1	1	4	4	1	4	1	4	4	4	4	4	4	4	4	4	4
MB-0381	3	3	3	3	3	3	3	3	2	2	3	1	2	3	3	1	3	1	3	3	1	3	2	3	1
MB-0592	1	1	1	1	1	1	1	1	2	1	2	1	1	2	1	1	1	1	1	1	1	1	1	2	2
MB-5271	2	2	2	2	2	2	2	2	2	2	2	2	2	2	2	2	2	2	2	2	2	2	2	2	2
MB-5235	5	5	5	5	5	5	5	5	5	4	5	5	5	5	5	5	5	5	5	5	5	5	5	5	5
MB-4931	5	5	5	5	5	5	5	5	5	5	5	5	5	5	5	5	1	5	5	5	5	5	5	5	5
MB-5332	2	3	2	2	1	3	3	3	2	1	2	2	2	3	1	1	2	3	2	2	2	3	2	2	2
MB-7045	3	3	3	3	3	3	3	3	3	3	3	3	3	3	3	3	3	3	3	3	3	3	3	5	3
MB-7049	5	5	5	5	5	5	5	5	5	5	5	5	5	5	5	5	5	4	5	5	5	5	5	5	5
MB-7031	5	5	5	5	5	5	5	5	5	5	5	5	5	5	5	5	5	5	5	5	5	5	5	5	5
MB-7061	1	1	1	1	1	1	1	1	1	1	4	1	1	4	1	1	1	1	4	1	1	1	1	1	2
MB-7050	1	1	2	2	1	1	1	1	3	1	1	1	1	1	1	1	1	1	1	2	1	1	1	1	1
MB-7078	5	5	5	5	5	5	5	5	2	2	5	5	5	5	5	5	5	3	5	5	5	5	5	5	5
MB-7054	5	5	5	5	3	5	3	5	5	2	3	5	5	5	2	5	5	3	3	5	3	3	5	5	5
MB-7048	1	2	2	2	1	1	1	1	1	1	1	1	1	1	1	1	2	1	2	2	4	1	1	1	1
MB-7058	1	1	4	4	1	1	1	1	1	1	1	1	4	1	1	1	1	1	1	4	1	1	1	1	1
MB-7056	1	1	1	1	1	1	1	1	1	1	1	1	1	1	1	1	1	1	1	1	1	1	1	1	1
MB-7038	5	5	5	5	5	5	5	5	5	5	5	5	5	5	5	5	5	5	5	5	5	5	5	5	5
MB-7086	2	2	2	2	2	2	2	2	2	2	2	2	2	2	2	2	1	2	2	2	2	2	2	2	2
MB-0177	1	1	1	1	1	1	1	1	1	1	1	1	1	1	1	1	1	1	1	1	1	1	1	1	1
MB-0435	5	4	4	4	5	5	5	5	5	4	5	4	5	5	5	4	1	4	5	4	5	5	4	4	5
MB-0159	4	3	3	3	4	4	4	4	3	4	4	3	4	4	4	4	2	4	4	3	4	4	3	4	3
MB-0399	3	3	3	3	3	3	3	3	3	3	3	3	3	3	3	3	3	3	3	3	3	3	3	3	3
MB-0388	1	4	1	1	1	1	1	1	1	1	4	1	1	1	1	1	4	1	1	1	4	1	1	1	1
MB-0351	1	1	1	1	1	1	1	1	1	1	1	1	1	1	1	1	1	1	1	1	1	1	1	1	1
MB-0615	4	4	4	4	4	4	4	4	4	4	4	4	4	4	4	3	3	4	4	4	5	4	4	1	4
MB-0265	4	4	4	4	4	4	4	4	4	4	5	4	4	4	5	4	3	5	5	4	5	4	4	4	4
MB-0116	1	1	1	1	1	1	1	1	1	1	1	1	1	1	1	1	1	1	1	1	1	1	1	1	1
MB-0472	2	1	2	2	2	2	2	2	1	1	2	2	2	2	2	1	1	2	1	2	1	2	2	2	2
MB-0330	INC	3	4	4	4	4	4	4	2	1	4	1	1	3	4	1	2	2	3	4	1	4	3	1	4
MB-0191	5	5	5	5	5	5	5	5	5	5	3	5	5	5	5	5	5	3	5	5	3	5	5	5	5
MB-0231	1	1	1	1	1	1	1	1	1	1	1	1	1	1	1	1	1	1	1	1	1	1	1	1	1
MB-0558	5	5	5	5	5	5	5	5	5	5	5	5	5	5	5	5	5	5	5	5	5	5	5	5	5
MB-0393	4	4	4	4	4	4	4	4	4	1	2	1	4	4	4	4	2	4	4	4	4	4	1	2	1
MB-0553	1	1	1	1	1	1	1	1	1	1	1	1	1	1	1	1	1	1	1	1	1	1	1	2	1
MB-0587	1	1	1	1	1	1	1	1	1	2	1	1	1	1	1	1	1	1	1	1	1	1	1	1	1
MB-0611	1	1	1	1	1	1	1	1	1	1	1	1	1	1	1	1	2	1	2	1	1	1	1	1	1
MB-0640	1	1	1	1	1	1	1	1	1	1	1	1	1	1	1	1	1	1	1	1	1	1	1	1	1
MB-0114	1	1	1	1	1	1	1	1	1	1	1	1	1	1	1	1	1	1	1	1	1	1	1	1	1
MB-0222	1	1	1	1	1	1	1	1	1	1	1	1	1	1	1	1	1	4	1	1	1	1	1	1	1
MB-0284	5	5	5	5	5	5	5	5	5	5	5	5	5	5	5	5	5	5	5	5	5	5	5	5	5
MB-0459	2	2	2	2	2	2	2	2	2	2	2	2	2	2	2	1	2	2	3	2	1	2	1	1	2
MB-0128	1	1	1	1	1	1	1	1	1	1	4	1	1	1	1	1	4	1	1	1	4	1	1	1	1
MB-0639	5	5	5	5	5	5	5	5	5	5	5	5	5	5	5	5	5	5	5	5	5	5	5	5	5
MB-0318	4	4	4	4	5	4	4	4	4	4	4	4	4	4	5	4	4	4	4	4	4	4	4	4	5
MB-0417	1	1	1	1	1	1	1	1	1	1	1	1	1	1	1	1	1	1	1	1	1	1	1	1	1
MB-6238	1	1	1	1	1	1	1	1	1	1	1	1	1	1	1	1	1	1	1	1	1	1	1	1	1
MB-6286	1	1	1	1	1	1	1	1	1	1	1	1	1	1	1	1	1	1	1	1	1	1	1	1	1
MB-6328	1	1	1	1	1	1	1	1	1	1	2	2	2	2	1	1	1	2	1	1	1	1	2	1	1
MB-6284	2	2	2	2	2	2	2	2	2	1	2	2	2	2	2	2	1	2	2	2	2	2	2	2	2
MB-6363	3	3	3	3	1	1	1	3	3	1	1	3	4	3	1	3	2	5	3	3	3	1	3	1	3
MB-6224	3	3	3	3	3	3	3	3	3	3	3	3	3	3	3	3	1	3	3	3	3	3	3	3	3
MB-6297	1	1	1	1	1	1	1	1	1	1	1	1	1	1	1	1	1	1	1	1	1	1	1	1	1
MB-6239	1	1	1	1	1	1	1	1	1	1	1	1	1	1	1	1	1	1	1	1	1	1	1	1	1
MB-6208	1	1	1	1	4	1	1	1	4	4	1	1	1	1	1	1	3	1	1	1	1	1	1	1	1
MB-6273	1	1	1	1	1	1	1	1	1	1	1	1	1	1	1	1	1	1	1	1	1	1	1	1	1
MB-6344	2	2	2	2	2	2	2	2	2	2	2	2	2	2	2	2	1	2	2	2	2	2	2	2	2
MB-6312	2	2	2	2	2	2	2	2	2	2	2	2	2	2	2	2	2	2	2	2	2	2	2	2	1
MB-6212	1	1	1	1	1	1	1	1	1	1	1	1	1	1	1	1	1	1	1	1	1	1	1	1	1
MB-6302	2	2	2	2	2	2	2	2	2	2	2	2	2	2	2	2	2	2	2	2	2	2	2	2	2
MB-6327	1	1	1	1	2	2	2	2	2	2	1	1	1	1	2	1	1	1	2	1	2	2	1	1	2
MB-6287	2	2	2	2	2	2	2	2	2	2	2	2	2	2	2	2	2	2	2	2	2	2	2	2	2
MB-6213	1	1	1	1	1	1	1	1	1	1	1	1	1	1	1	1	1	1	1	1	1	1	1	1	1
MB-6251	5	5	5	5	5	5	5	5	5	5	5	5	5	5	5	5	5	5	5	5	5	5	5	5	5
MB-0489	4	4	4	4	5	4	4	4	4	4	4	4	4	5	5	4	5	5	4	4	4	4	4	1	5
MB-0335	1	1	1	1	1	1	1	1	1	1	2	1	1	1	1	2	1	1	2	1	2	1	1	1	1
MB-0407	1	1	4	4	4	1	1	1	1	1	1	1	1	1	1	1	1	1	1	4	1	1	1	1	1
MB-0876	4	4	4	4	5	4	4	4	4	1	4	4	4	4	5	4	1	5	4	4	4	4	4	4	5
MB-0342	4	4	4	4	4	4	4	4	4	4	4	4	4	4	4	4	4	4	4	4	4	4	1	4	4
MB-7289	4	4	4	4	4	4	4	4	4	4	4	4	4	4	4	4	4	4	4	4	4	4	4	4	4
MB-3253	2	2	2	2	2	2	2	2	2	2	2	2	2	2	2	2	2	2	2	2	2	2	2	2	2
MB-7291	3	3	3	3	2	5	5	3	3	2	3	3	3	5	5	3	3	5	3	3	3	5	3	5	3
MB-7243	1	1	1	1	1	1	1	1	1	1	1	1	1	1	1	1	1	1	1	1	1	1	1	1	1
MB-3466	2	2	2	2	3	2	2	2	3	2	2	2	2	2	2	2	2	2	2	2	2	2	2	2	2
MB-7286	2	2	2	2	2	2	2	2	1	2	2	2	2	2	2	2	2	2	2	2	2	2	2	2	2
MB-7292	2	2	2	2	2	2	2	2	2	2	2	2	2	2	2	2	2	2	2	2	2	2	2	2	2
MB-7275	2	2	2	2	2	2	2	2	2	2	3	3	1	1	1	3	1	2	3	2	1	2	3	2	3
MB-7249	1	1	1	1	1	1	1	1	1	1	1	1	1	1	1	1	1	1	1	1	1	1	1	1	4
MB-7295	1	1	1	1	1	1	1	1	1	1	1	1	1	1	1	1	1	1	1	1	1	1	1	1	1
MB-7297	2	2	2	2	2	2	2	2	2	2	2	2	2	2	2	2	1	2	2	2	2	2	2	2	2
MB-7294	2	2	2	2	1	2	1	1	2	2	2	2	1	2	1	1	1	2	2	2	2	1	2	1	2
MB-7296	2	2	2	2	2	2	2	2	2	2	2	2	2	2	2	2	2	2	2	2	2	2	2	2	2
MB-3402	2	2	2	2	2	2	2	2	1	2	2	2	2	2	2	2	2	2	2	2	1	2	1	2	1
MB-5113	1	1	1	1	1	1	1	1	1	1	1	1	1	1	1	1	1	1	1	1	1	1	1	1	1
MB-5450	5	5	5	5	5	5	5	5	5	5	5	5	5	5	5	5	5	5	5	5	5	5	5	5	5
MB-7032	1	1	1	1	1	1	1	1	1	1	1	1	1	1	1	1	1	1	1	1	1	1	1	1	1
MB-7037	1	1	1	1	1	1	1	1	1	1	1	1	1	1	1	1	1	1	1	1	1	1	1	1	1
MB-7040	1	1	1	1	1	1	1	1	1	1	1	1	1	1	1	1	1	1	1	1	1	1	1	1	1
MB-7020	3	3	3	3	3	3	3	3	3	3	3	3	3	3	3	3	3	3	3	3	5	3	3	5	3
MB-7042	2	2	2	2	2	2	2	2	2	2	2	2	2	1	2	2	2	2	1	2	2	2	2	2	2
MB-7043	1	1	1	1	1	1	1	1	1	1	1	1	1	1	1	1	1	1	1	1	1	1	1	1	1
MB-7028	2	2	2	2	2	2	2	2	2	2	2	2	2	2	1	2	2	2	2	2	2	2	2	2	1
MB-7029	1	1	1	1	1	1	1	1	1	1	1	1	1	1	1	1	1	1	1	1	1	1	1	1	2
MB-7027	INC	3	3	3	3	3	3	3	5	2	5	5	5	5	5	5	5	3	5	3	5	3	3	3	5
MB-7060	1	1	1	1	1	1	1	1	1	1	1	1	1	1	1	1	1	1	1	1	1	1	1	1	1
MB-7034	1	1	1	1	1	1	1	1	1	1	1	1	1	1	1	1	1	1	1	1	1	1	1	1	1
MB-5191	1	1	1	1	1	1	1	1	1	1	1	1	1	1	1	1	1	4	1	1	1	1	1	1	1
MB-5214	4	4	4	4	4	4	4	4	4	4	4	1	1	4	4	1	1	1	1	4	1	4	4	4	1
MB-5204	1	1	1	1	1	1	1	1	1	1	1	1	1	1	1	1	1	1	1	1	1	1	1	1	1
MB-5155	INC	4	4	4	1	1	1	1	1	1	4	4	1	4	1	1	4	4	3	4	4	1	1	4	4
MB-5190	INC	3	5	5	4	4	4	4	3	3	5	4	3	4	4	4	1	4	5	5	5	4	3	4	3
MB-5614	1	1	1	1	1	1	1	1	1	1	1	1	1	1	1	1	1	4	1	1	1	1	1	1	1
MB-5592	2	2	2	2	2	2	2	2	1	2	2	2	2	2	2	2	1	2	2	2	2	2	2	2	2
MB-0437	2	2	2	2	2	2	2	2	2	2	2	2	2	2	2	2	1	2	2	2	2	2	2	2	2
MB-0028	2	2	2	2	2	2	2	2	2	1	2	2	2	2	2	2	2	2	2	2	2	2	2	2	2
MB-0309	1	1	1	1	1	1	1	1	1	1	1	1	1	1	1	1	1	1	1	1	1	1	1	1	1
MB-0100	5	5	5	5	5	5	5	5	5	5	5	5	5	5	5	5	5	5	5	5	5	5	5	5	5
MB-5648	1	1	1	1	1	1	1	1	1	1	1	1	1	1	1	1	1	1	1	1	1	1	1	1	1
MB-5572	5	5	5	5	5	5	5	5	5	5	5	5	5	5	5	5	5	5	5	5	5	5	5	5	5
MB-5655	5	5	5	5	5	5	5	5	5	5	5	5	5	5	5	5	5	5	5	5	5	5	5	5	5
MB-5577	INC	2	2	2	3	3	2	3	1	2	3	3	3	2	2	3	1	3	3	2	3	2	2	1	3
MB-5585	1	1	1	1	1	1	1	1	1	1	1	1	1	1	1	1	1	1	1	1	1	1	1	1	1
MB-5620	1	1	1	1	1	1	1	1	1	1	1	1	1	1	1	1	1	1	1	1	1	1	1	1	1
MB-5652	4	4	4	4	4	4	4	4	4	4	4	4	4	4	4	4	4	4	4	4	4	4	4	4	1
MB-0537	4	4	4	4	4	4	4	4	4	4	4	4	4	4	4	4	4	4	4	4	4	4	4	4	4
MB-0544	1	1	1	1	1	1	1	1	1	2	1	1	1	1	1	1	1	1	2	1	1	1	1	1	2
MB-0468	1	1	1	1	1	1	1	1	1	1	1	1	1	1	1	1	1	1	1	1	1	1	1	1	1
MB-0333	5	5	5	5	5	5	5	5	5	5	5	5	5	5	5	5	5	3	5	5	5	5	5	5	5
MB-0205	4	4	4	4	1	4	4	4	4	1	4	4	4	4	1	4	4	4	4	4	4	4	4	1	4
MB-0233	1	1	1	1	1	1	1	1	1	1	1	1	1	1	1	1	1	1	1	1	1	1	1	1	1
MB-0210	5	3	4	4	5	5	5	5	5	2	3	5	5	5	5	5	1	5	3	4	3	5	5	5	5
MB-0200	5	5	5	5	5	5	5	5	5	5	5	5	5	5	5	5	5	5	5	5	5	5	5	5	5
MB-0244	1	1	1	1	1	1	1	1	1	1	1	1	1	1	1	1	1	1	1	1	1	1	1	1	1
MB-5588	INC	4	4	4	4	4	4	4	4	1	2	1	1	1	1	1	4	4	1	4	1	4	1	5	1
MB-5628	2	2	2	2	2	2	2	2	2	2	2	2	2	2	2	2	2	2	2	2	2	2	2	2	2
MB-5633	5	3	5	5	5	5	5	5	5	3	5	5	5	5	5	5	5	5	5	5	5	5	5	5	5
MB-0169	4	4	4	4	4	4	4	4	1	1	4	4	4	4	4	1	4	4	4	4	4	4	4	4	4
MB-0253	1	1	1	1	1	1	1	1	1	1	1	1	1	1	1	1	1	1	1	1	1	1	1	4	1
MB-0226	1	1	1	1	1	1	1	1	1	1	1	1	1	1	1	1	1	1	1	1	1	1	1	1	1
MB-0278	5	5	5	5	5	5	5	5	5	5	5	5	5	5	5	5	5	5	5	5	5	5	5	5	5
MB-0266	1	1	1	1	1	1	1	1	1	1	1	1	1	1	1	1	1	1	1	1	1	1	1	1	1
MB-0577	2	2	2	2	2	2	2	2	2	2	3	2	2	2	2	2	3	2	2	2	1	2	2	1	2
MB-0156	4	4	4	4	4	4	4	4	4	4	4	4	4	4	4	4	4	4	4	4	4	4	4	4	5
MB-0531	4	4	4	4	4	4	4	4	4	1	4	4	4	4	4	4	4	1	4	4	4	4	4	4	4
MB-0245	1	1	1	1	1	1	1	1	1	1	1	1	1	1	1	1	1	1	1	1	1	1	1	1	1
MB-5641	2	2	2	2	2	2	2	2	2	2	2	2	2	2	2	2	2	2	2	2	2	2	2	2	2
MB-5640	1	1	1	1	1	1	1	1	1	1	1	1	1	1	1	1	1	1	1	1	1	1	1	4	1
MB-0534	4	4	4	4	4	4	4	4	4	4	4	4	4	4	4	4	4	4	4	4	4	4	4	4	4
MB-0230	3	3	3	3	4	3	4	3	3	5	3	3	4	3	4	3	2	3	5	3	4	4	3	4	3
MB-0433	1	4	4	4	1	1	1	1	1	1	1	1	1	1	1	1	1	4	4	4	1	1	1	4	4
MB-0109	2	2	2	2	4	2	2	2	2	2	2	2	2	2	2	2	3	2	2	2	3	2	2	2	2
MB-0304	2	2	2	2	2	2	2	2	2	2	2	2	2	2	2	2	3	2	2	2	2	2	2	2	2
MB-0369	2	2	2	2	2	2	2	2	2	1	2	2	2	2	2	2	2	2	2	2	1	2	2	2	1
MB-0627	3	3	3	3	3	3	5	3	5	3	3	3	3	3	3	5	3	3	4	3	3	5	3	5	3
MB-0492	2	1	2	2	2	2	2	2	2	2	1	1	2	2	2	2	1	2	2	2	1	2	2	1	2
MB-0147	1	1	1	1	1	1	1	1	1	1	1	1	1	1	1	2	1	2	1	1	1	1	1	4	2
MB-0442	1	4	4	4	1	1	1	1	1	1	1	1	1	1	1	1	4	1	1	4	1	1	1	1	1
MB-0111	1	1	1	1	1	1	1	1	1	1	1	1	1	1	1	1	1	1	1	1	1	1	1	1	1
MB-0634	4	4	4	4	4	4	4	4	4	4	4	4	4	4	4	4	4	4	4	4	4	4	4	4	5
MB-0329	INC	2	4	4	1	1	1	1	2	2	2	1	4	4	1	1	1	1	2	4	2	1	1	2	1
MB-0280	1	1	1	1	1	1	1	1	1	1	1	1	1	4	1	1	1	1	1	1	1	1	1	1	1
MB-0490	1	1	1	1	1	1	1	1	1	1	1	1	1	1	1	1	1	1	1	1	1	1	1	1	1
MB-0885	4	4	4	4	5	4	4	4	4	4	4	4	4	4	5	4	4	5	4	4	4	4	4	1	5
MB-0178	2	2	2	2	2	2	2	2	2	2	2	2	2	2	2	2	2	2	2	2	2	2	2	2	2
MB-0242	1	1	1	1	1	1	1	1	1	1	1	1	1	1	1	1	1	1	1	1	1	1	1	1	2
MB-5624	5	5	5	5	5	5	5	5	5	5	5	5	5	5	5	5	5	5	5	5	5	5	5	5	5
MB-5593	3	3	3	3	3	3	3	3	3	3	3	3	3	3	3	3	1	3	3	3	3	3	3	3	3
MB-4010	2	2	2	2	2	2	2	2	2	2	2	2	3	2	2	2	1	2	1	2	2	2	2	2	2
MB-5605	2	1	2	2	2	2	2	2	1	2	1	1	1	2	2	1	1	2	1	2	2	2	2	2	1
MB-5636	2	2	2	2	2	2	2	2	2	2	2	2	2	2	2	2	2	2	2	2	2	2	2	2	2
MB-4529	1	1	1	1	1	1	1	1	1	1	1	1	1	1	1	1	1	1	1	1	1	1	1	1	1
MB-5566	5	5	5	5	5	5	5	5	5	5	5	5	5	5	5	5	5	5	5	5	5	5	5	5	5
MB-0268	2	2	2	2	2	2	2	2	2	2	1	2	2	2	2	1	2	2	2	2	2	2	1	2	2
MB-0160	4	4	4	4	4	4	4	4	4	4	4	4	4	4	4	4	4	4	4	4	4	4	4	4	4
MB-0275	4	4	4	4	4	4	4	1	1	1	4	1	1	1	4	1	4	4	4	4	4	4	1	1	1
MB-0127	4	4	4	4	5	4	4	4	1	1	5	4	4	1	5	1	1	1	4	4	5	4	1	4	4
MB-0045	INC	4	4	4	5	4	4	4	5	4	5	4	5	4	5	5	5	5	5	4	5	4	5	4	5
MB-0414	5	5	5	5	5	5	5	5	5	5	5	5	5	5	5	5	5	5	5	5	5	5	5	5	5
MB-0259	5	5	5	5	5	5	5	5	5	5	5	5	5	5	5	5	5	5	5	5	5	5	5	5	5
MB-0396	5	5	5	5	5	5	5	5	5	5	5	5	5	5	5	5	5	5	5	5	5	5	5	5	5
MB-0874	5	5	5	5	5	5	5	5	5	5	5	5	5	5	5	5	5	5	5	5	5	5	5	5	5
MB-0179	4	4	4	4	4	4	4	4	4	4	4	4	4	4	4	4	1	4	4	4	4	4	4	4	5
MB-0526	2	2	2	2	2	2	2	2	2	2	2	2	2	2	2	2	2	2	2	2	2	2	2	2	2
MB-0586	1	1	1	1	1	1	1	1	1	1	1	1	1	1	1	1	1	1	1	1	1	1	1	1	1
MB-0508	1	2	1	1	1	1	1	4	1	1	1	1	1	1	1	1	2	1	1	1	1	1	1	1	1
MB-0288	1	1	1	1	1	1	1	1	1	4	1	1	1	4	1	1	1	4	1	1	1	1	1	4	1
MB-0269	5	4	4	4	5	5	5	5	5	5	5	5	5	5	5	5	1	5	5	4	5	5	5	5	5
MB-0582	5	5	5	5	5	5	5	5	5	5	5	5	5	5	4	5	5	5	5	5	5	5	5	5	5
MB-0901	5	5	5	5	5	5	5	5	5	5	5	5	5	5	5	5	5	5	5	5	5	5	5	5	5
MB-0000	4	4	4	4	4	4	4	4	4	4	4	4	4	4	4	4	4	4	4	4	4	4	4	4	4
MB-0535	1	1	1	1	1	1	1	1	1	1	1	1	1	1	1	1	1	1	1	1	1	1	1	1	1
MB-0469	2	2	2	2	4	2	2	2	2	2	2	2	2	2	2	2	2	2	2	2	2	2	2	1	2
MB-0478	1	4	4	4	1	1	1	1	1	1	4	4	1	1	1	1	1	4	4	4	4	1	1	4	4
MB-0547	1	1	1	1	1	1	1	1	1	1	1	1	1	1	1	2	1	2	1	1	1	1	1	1	2
MB-0499	4	4	4	4	4	4	5	4	4	4	4	4	4	5	5	4	5	5	4	4	4	5	4	4	5
MB-0170	1	1	1	1	1	1	1	1	1	1	1	1	1	1	1	1	1	1	1	1	1	1	1	1	1
MB-0403	4	4	4	4	4	4	4	4	5	4	4	4	4	4	4	4	5	4	4	4	4	4	4	4	5
MB-0464	INC	3	3	3	5	5	5	5	5	2	3	3	3	2	4	3	2	5	4	3	3	5	3	2	3
MB-0421	2	2	2	2	2	2	2	2	2	2	3	2	2	2	2	2	2	2	2	2	2	2	2	2	2
MB-0623	1	1	1	1	1	1	1	1	1	1	1	1	1	1	1	1	1	1	1	1	1	1	1	1	1
MB-0241	3	3	3	3	5	3	3	3	3	2	3	5	5	2	2	3	2	2	3	3	3	3	2	3	3
MB-0163	5	5	5	5	5	5	5	5	5	5	5	5	5	5	5	5	5	5	5	5	5	5	5	5	5
MB-0149	5	5	5	5	5	5	5	5	5	5	5	5	5	5	5	5	5	5	5	5	5	5	5	5	5
MB-0153	5	4	4	4	5	5	5	5	5	2	4	5	5	5	5	4	5	5	3	4	4	5	4	5	5
MB-0350	5	5	5	5	5	5	5	5	5	5	5	5	5	5	5	5	5	5	5	5	5	5	5	5	5
MB-0512	1	1	1	1	1	1	1	1	1	1	1	1	1	1	1	1	1	1	1	1	1	1	1	1	1
MB-0020	4	4	4	4	4	4	4	4	4	4	1	4	4	4	4	4	3	1	4	4	4	4	4	4	4
MB-0046	1	2	2	2	1	1	1	1	1	2	1	1	1	2	1	1	2	1	2	2	1	1	1	1	1
MB-0134	1	1	1	1	1	2	1	2	1	1	2	1	1	1	2	1	1	2	2	1	2	1	1	1	1
MB-0495	INC	4	4	4	3	3	3	3	3	3	4	4	1	3	3	4	1	5	4	4	4	3	4	4	5
MB-0470	INC	4	4	4	5	5	5	4	5	1	4	5	5	5	1	4	5	5	3	4	4	5	4	4	5
MB-0872	1	1	1	1	4	1	1	1	1	1	1	1	1	1	1	1	1	1	1	1	1	1	1	1	1
MB-0661	1	1	1	1	1	1	1	1	1	1	1	1	1	1	1	1	1	1	1	1	1	1	1	1	1
MB-0339	1	1	1	1	1	1	1	1	1	1	1	1	1	1	1	1	1	1	1	1	1	1	1	1	1
MB-0264	1	1	1	1	1	1	1	1	1	1	1	1	1	1	1	1	1	1	1	1	1	1	1	1	1
MB-0175	1	1	1	1	1	1	1	1	1	1	1	1	1	1	4	1	1	1	1	1	1	1	1	3	1
MB-0303	5	5	5	5	5	5	5	5	5	5	5	5	5	5	5	5	5	5	5	5	5	5	5	5	5
MB-0172	1	1	1	1	1	1	1	1	1	1	1	1	1	1	1	1	1	1	1	1	1	1	1	1	1
MB-0125	1	1	1	1	1	1	1	1	1	1	1	1	1	1	1	1	1	1	1	1	1	1	1	1	1
MB-0340	5	5	5	5	5	2	5	5	5	3	3	5	5	5	2	5	5	3	5	5	3	5	5	5	5
MB-0234	2	2	2	2	2	2	2	2	1	2	2	2	2	1	2	2	2	2	2	2	1	2	1	2	2
MB-0487	4	4	4	4	4	4	4	4	4	4	4	4	4	4	4	4	4	4	4	4	4	4	4	1	4
MB-0305	1	1	1	1	1	1	1	1	4	1	1	1	1	1	1	1	1	1	1	1	1	1	1	1	1
MB-0390	3	3	3	3	3	3	3	3	3	3	3	3	3	3	3	3	2	3	3	3	3	3	3	5	3
MB-0502	5	4	4	4	5	5	5	5	5	5	4	5	5	5	5	5	1	3	3	4	4	5	5	5	5
MB-0663	3	3	3	3	5	3	3	3	3	3	3	3	3	3	3	3	3	3	5	3	3	3	3	3	3
MB-0130	1	1	1	1	1	1	1	1	1	1	1	1	1	1	1	1	1	1	1	1	1	1	1	4	1
MB-0289	5	4	4	4	4	5	5	4	5	5	5	4	5	5	4	4	5	5	5	4	5	5	5	5	5
MB-0129	3	3	3	3	5	3	3	3	3	3	3	5	5	3	5	3	3	3	5	3	3	3	3	3	3
MB-0343	1	1	1	1	1	1	1	1	1	1	1	1	1	1	1	1	1	1	1	1	1	1	1	4	1
MB-0458	4	4	4	4	4	4	4	4	4	1	4	4	4	4	4	4	4	4	4	4	4	4	4	4	4
MB-0570	2	2	2	2	2	2	2	2	2	2	2	2	2	2	2	2	1	2	2	2	2	2	2	2	2
MB-0281	4	4	4	4	4	4	4	4	4	4	4	4	4	4	4	4	4	4	4	4	4	4	4	4	4
MB-0488	4	4	4	4	5	4	4	4	4	1	4	5	4	4	5	4	3	5	4	4	4	4	5	4	5
MB-0655	1	1	1	1	1	1	1	1	1	1	1	1	1	1	1	1	1	1	1	1	1	1	1	4	4
MB-0235	1	1	1	1	1	1	1	1	1	1	1	1	1	1	1	1	1	1	1	1	1	1	1	1	1
MB-0484	1	2	2	2	1	1	1	1	1	2	3	2	1	1	1	1	3	2	3	2	1	1	2	1	1
MB-0436	3	3	3	3	3	3	3	3	5	5	5	5	3	3	5	5	3	3	5	3	5	3	3	5	4
MB-0299	5	5	5	5	5	5	5	5	5	5	5	5	5	5	5	5	5	5	5	5	5	5	5	5	5
MB-0877	2	2	2	2	2	2	2	2	2	2	2	2	2	2	2	2	2	2	2	2	2	2	2	2	2
MB-0097	1	1	1	1	1	1	1	1	1	1	1	1	1	1	1	1	1	1	1	1	2	1	1	1	1
MB-0897	1	1	1	1	1	1	1	1	1	1	1	1	1	1	1	1	1	1	1	1	1	1	1	1	1
MB-0095	2	2	2	2	2	2	2	2	2	2	2	2	2	2	2	2	2	2	2	2	2	2	2	2	2
MB-0227	1	1	1	1	1	1	1	1	1	1	1	1	1	1	1	1	1	1	1	1	1	1	1	1	1
MB-0353	1	1	1	1	1	1	1	1	1	1	1	1	1	1	1	1	1	1	1	1	1	1	1	1	1
MB-0522	INC	3	3	3	1	3	4	1	3	3	3	3	3	1	4	3	1	1	1	3	4	4	3	4	1
MB-0543	3	5	3	3	3	3	3	3	3	3	2	2	5	3	2	2	3	3	5	3	3	3	2	2	2
MB-0196	INC	2	4	4	4	4	4	4	4	1	1	1	1	4	1	1	3	1	2	4	1	4	1	5	4
MB-0646	2	2	2	2	2	2	2	2	1	2	1	2	2	2	2	2	2	2	2	2	1	2	2	1	2
MB-0293	4	4	4	4	4	4	4	4	4	4	4	4	4	4	4	4	4	4	4	4	4	4	4	4	4
MB-0552	3	3	3	3	1	3	3	3	3	3	3	4	4	4	1	3	2	3	3	3	3	3	3	3	3
MB-0260	1	1	1	1	1	1	1	1	1	1	1	1	1	1	1	1	1	1	1	1	1	1	1	1	1
MB-0326	1	4	1	1	1	1	1	1	1	1	1	1	1	1	1	1	1	1	1	1	1	1	1	1	1
MB-0256	1	1	1	1	1	1	1	1	1	1	1	1	1	1	1	1	1	1	1	1	1	1	1	1	1
MB-0539	INC	3	3	3	4	4	4	4	5	4	4	3	4	3	4	3	1	5	3	3	3	4	5	2	3
MB-0626	2	2	2	2	2	2	2	2	2	2	2	2	2	2	2	2	2	2	2	2	2	2	2	2	2
MB-0355	1	1	1	1	1	1	1	1	1	1	1	1	1	1	1	1	1	1	1	1	1	1	1	2	1
MB-0211	INC	4	3	3	5	3	3	3	3	3	5	5	5	1	5	3	3	5	5	3	5	3	4	4	5
MB-0124	1	1	1	1	1	1	1	1	4	1	1	1	1	1	1	1	1	1	1	1	1	1	1	1	1
MB-0510	1	1	1	1	1	1	1	1	1	1	1	1	1	1	1	1	1	1	1	1	1	1	1	1	1
MB-0365	INC	3	3	3	2	3	3	3	3	3	2	2	2	3	2	2	2	2	2	3	2	3	2	3	1
MB-0290	1	1	1	1	1	1	1	1	1	1	1	1	1	1	1	1	1	1	1	1	1	1	1	1	1
MB-0113	3	3	3	3	1	3	3	3	5	1	3	3	3	3	1	3	1	3	3	3	3	3	3	3	3
MB-0620	4	4	4	4	4	4	4	4	4	4	4	4	4	4	4	4	4	4	4	4	4	4	4	4	4
MB-0282	4	4	4	4	4	4	4	4	4	1	4	1	1	1	1	1	1	1	1	4	4	4	1	4	1
MB-0228	4	4	4	4	4	4	4	4	1	1	1	4	1	4	4	4	1	4	4	4	1	4	1	4	4
MB-0578	4	4	4	4	4	4	4	4	4	1	4	4	1	4	4	4	1	1	4	4	4	4	4	4	4
MB-0479	3	3	3	3	3	3	3	3	3	3	3	3	3	3	3	3	1	3	3	3	3	3	3	3	1
MB-0263	1	4	1	1	4	1	1	1	1	1	1	1	1	1	1	1	1	1	1	1	1	1	1	4	1
MB-0509	2	2	2	2	2	2	2	2	2	2	2	2	2	2	2	2	2	2	2	2	1	2	2	2	1
MB-0110	4	4	4	4	1	1	4	4	4	1	4	4	4	4	1	1	4	1	4	4	4	4	4	4	5
MB-0279	1	1	4	4	4	4	4	4	1	1	1	1	1	1	1	1	1	4	1	4	1	4	1	1	4
MB-0168	1	4	4	4	1	1	1	1	1	1	4	1	1	1	1	1	4	4	1	4	1	1	1	4	1
MB-0588	4	4	4	4	4	4	4	4	4	4	4	4	4	4	4	4	4	3	4	4	4	4	4	1	4
MB-0462	3	3	3	3	5	3	3	3	3	1	3	3	5	3	1	3	2	5	1	3	4	3	3	2	3
MB-0262	2	2	2	2	2	2	2	2	2	2	2	2	2	2	2	2	2	2	2	2	2	2	2	2	2
MB-0907	4	4	4	4	4	4	4	4	4	1	4	4	4	4	4	1	1	4	1	4	4	4	4	1	4
MB-0554	1	1	1	1	1	1	1	1	1	1	1	1	1	1	1	1	1	1	1	1	1	1	1	1	1
MB-0418	2	2	2	2	2	2	2	2	2	2	2	2	2	2	2	2	1	2	2	2	2	2	2	2	2
MB-0193	1	1	1	1	1	1	1	1	1	1	1	1	1	1	1	1	2	2	1	1	1	1	1	1	1
MB-0652	1	3	1	1	3	3	3	3	4	1	1	1	1	1	3	1	1	3	3	1	2	3	1	1	1
MB-0638	1	4	4	4	1	1	1	1	1	1	4	1	1	1	1	4	4	4	4	4	4	1	1	1	4
MB-0188	2	3	2	2	2	2	2	3	2	2	3	3	3	3	2	3	2	3	3	2	3	2	2	2	3
MB-0617	4	4	4	4	4	4	4	4	4	4	4	4	4	5	5	4	1	4	4	4	4	4	4	4	5
MB-7225	5	5	5	5	5	5	5	5	5	5	5	5	5	5	5	5	5	5	5	5	5	5	5	5	5
MB-7141	1	1	1	1	1	1	1	1	1	1	1	1	1	1	1	1	1	1	1	1	1	1	1	1	1
MB-7234	1	1	2	2	1	1	1	1	1	1	1	2	2	1	1	1	1	2	1	2	2	1	2	1	2
MB-7089	5	5	5	5	5	5	5	5	5	5	5	5	5	5	5	5	1	5	5	5	5	5	5	4	5
MB-7030	5	4	5	5	5	5	5	5	5	5	4	5	4	5	5	5	5	5	4	5	4	5	5	4	5
MB-7004	1	1	1	1	1	1	1	1	1	1	1	1	1	1	1	1	1	1	1	1	1	1	1	2	1
MB-7119	5	5	5	5	5	5	5	5	5	5	5	5	5	5	5	5	5	3	5	5	5	5	5	5	5
MB-7263	2	2	2	2	2	2	2	2	2	2	2	2	2	2	2	2	2	2	1	2	2	2	2	2	2
MB-7012	5	5	5	5	5	5	5	5	5	5	5	5	5	5	5	5	5	5	5	5	5	5	5	5	5
MB-0174	5	5	5	5	5	5	5	5	5	5	5	5	5	5	5	5	5	5	5	5	5	5	5	5	5
MB-7182	INC	3	3	3	3	3	3	3	2	2	2	2	2	3	3	2	3	2	2	3	2	3	2	2	2
MB-7039	4	4	4	4	4	4	4	4	1	1	4	4	4	4	5	1	1	5	1	4	5	4	1	1	1
MB-3797	1	1	1	1	1	1	1	1	1	1	1	1	1	1	1	1	1	1	1	1	1	1	1	2	1
MB-7112	2	2	2	2	2	2	2	2	2	2	2	2	2	2	2	2	2	2	2	2	4	2	2	2	2
MB-0308	1	4	1	1	1	1	1	1	1	1	4	1	1	1	1	1	1	1	1	1	4	1	1	4	1
MB-7230	1	1	1	1	1	1	1	1	1	1	2	1	1	1	1	1	1	1	2	1	2	1	1	1	1
MB-5452	1	1	1	1	1	1	1	1	1	1	1	1	1	1	1	1	1	1	1	1	1	1	1	1	1
MB-6195	1	1	1	1	1	1	1	1	1	1	1	1	1	1	1	1	1	1	1	1	1	1	1	1	1
MB-6317	2	2	2	2	2	2	2	2	2	2	2	2	2	2	2	2	2	2	2	2	2	2	2	1	2
MB-5460	INC	2	4	4	5	4	5	2	1	2	2	1	2	4	1	1	2	1	2	4	1	5	2	1	1
MB-5464	1	1	1	1	1	1	1	1	1	1	1	1	1	1	1	1	1	1	1	1	1	1	1	1	1
MB-5552	2	2	2	2	2	2	2	2	2	2	2	2	2	2	2	2	1	2	2	2	2	2	2	2	2
MB-5547	5	5	5	5	5	5	5	5	5	5	5	5	5	5	5	5	5	5	5	5	5	5	5	5	5
MB-6189	2	2	2	2	2	2	2	2	2	2	2	2	2	2	2	2	2	2	2	2	2	2	2	2	2
MB-6122	INC	3	3	3	5	4	4	4	4	4	4	1	2	4	5	4	3	1	2	3	2	4	1	1	4
MB-6192	2	2	2	2	2	2	2	2	2	2	2	2	2	2	2	2	2	2	2	2	2	2	2	2	2
MB-4820	1	1	1	1	1	1	1	1	1	1	1	1	1	1	1	1	1	1	1	1	1	1	1	1	1
MB-5527	3	3	3	3	5	3	3	3	3	2	3	3	3	5	5	5	1	5	3	3	3	3	5	3	3
MB-5167	2	2	2	2	2	2	2	2	2	2	2	2	2	2	2	2	2	2	2	2	2	2	2	1	2
MB-5465	5	5	5	5	5	5	5	5	5	5	5	5	5	5	5	5	5	5	5	5	5	5	5	5	5
MB-5453	4	4	4	4	4	4	4	4	4	4	4	4	4	4	4	4	4	4	4	4	4	4	4	4	4
MB-5471	1	1	1	1	1	1	1	1	1	1	1	1	1	1	1	1	1	1	1	1	1	1	1	1	1
MB-5127	2	2	1	1	2	2	2	2	2	2	2	2	2	2	2	2	1	2	2	1	2	2	2	1	2
MB-4313	1	1	1	1	3	1	1	1	1	1	1	1	1	1	1	1	1	1	1	1	1	1	1	4	1
MB-4823	3	3	3	3	4	3	3	3	3	3	3	3	3	3	3	3	2	3	3	3	3	3	3	4	3

## Sheet: Pred ROCK PAM50
	Class	BayesNet	NaiveBayes	NaiveBayesUpdateable	Logistic	MultilayerPerceptron	SimpleLogistic	SMO	IBk	KStar	AttributeSelectedClassifier	Bagging	ClassificationViaRegression	LogitBoost	MultiClassClassifier	RandomCommittee	DecisionTable	JRip	PART	HoeffdingTree	J48	LMT	RandomForest	RandomTree	REPTree
GSM107072	1	1	1	1	1	1	1	1	1	1	1	1	1	1	1	1	3	4	2	1	1	1	1	1	1
GSM107073	2	2	2	2	2	2	2	2	2	2	2	2	2	2	2	2	1	2	2	2	2	2	2	2	2
GSM107075	1	4	4	4	1	1	1	1	4	1	1	1	1	1	1	1	3	1	1	4	1	1	1	1	1
GSM107076	1	1	2	2	1	1	1	2	1	1	1	1	1	1	1	1	3	1	2	2	1	1	1	1	1
GSM107077	2	2	2	2	2	2	2	2	2	2	2	2	2	2	2	2	2	2	2	2	2	2	2	2	2
GSM107078	1	1	1	1	1	1	1	2	1	1	1	1	1	1	1	1	1	1	1	1	1	1	1	1	1
GSM107079	1	1	4	4	1	1	1	1	1	1	1	1	1	1	1	1	3	1	1	4	1	1	1	1	1
GSM107080	5	5	5	5	5	5	5	5	5	2	5	5	5	5	5	5	5	5	5	5	5	5	5	5	5
GSM107081	4	4	4	4	1	4	4	4	4	1	4	1	4	4	4	1	3	4	4	4	4	4	1	1	1
GSM107082	5	5	5	5	5	5	5	5	5	5	5	5	5	5	5	5	5	5	5	5	5	5	5	4	5
GSM107083	1	1	1	1	1	1	1	1	1	1	1	1	1	1	1	1	3	1	1	1	1	1	1	1	1
GSM107084	2	2	2	2	2	2	2	2	2	2	2	2	1	1	2	1	3	1	2	2	2	2	2	2	2
GSM107085	2	2	2	2	2	2	2	2	2	2	2	2	2	2	2	2	2	2	2	2	2	2	2	2	2
GSM107086	1	1	1	1	1	1	1	1	1	1	1	1	1	1	1	1	3	1	1	4	1	1	1	1	1
GSM107087	2	2	2	2	2	2	2	2	2	2	2	1	1	2	2	1	3	1	2	2	1	2	1	2	2
GSM107088	2	1	2	2	2	2	2	2	1	1	2	2	2	2	2	1	2	2	2	2	2	2	2	2	2
GSM107089	1	2	2	2	1	1	1	2	1	1	1	1	1	1	1	1	3	1	1	2	2	1	1	2	1
GSM107090	5	5	5	5	5	5	5	5	5	5	4	1	1	5	5	5	5	4	5	5	2	5	5	4	4
GSM107091	1	1	1	1	1	1	1	1	1	1	1	1	1	1	1	1	1	1	1	1	1	1	1	1	1
GSM107092	1	1	1	1	1	1	1	1	1	1	1	1	1	2	1	1	1	1	1	1	1	1	1	1	1
GSM107093	2	2	4	4	1	2	2	2	2	2	2	2	1	1	2	1	3	1	1	4	2	2	2	2	2
GSM107094	2	2	2	2	2	2	2	2	2	2	2	2	2	2	2	1	3	2	2	2	3	2	1	2	2
GSM107095	1	1	1	1	1	1	1	1	1	1	1	1	1	1	1	1	1	2	2	1	1	1	1	1	1
GSM107096	1	1	4	4	1	1	1	1	1	2	1	1	1	1	1	1	3	1	1	4	1	1	1	1	1
GSM107097	1	1	1	1	1	1	1	1	2	1	1	1	1	1	2	1	2	1	2	1	1	1	1	2	1
GSM107098	1	1	4	4	1	1	1	1	1	1	1	1	1	1	1	1	3	1	1	4	1	1	1	1	1
GSM107099	2	2	2	2	2	1	2	2	2	1	1	1	1	1	2	1	2	2	2	2	3	2	1	2	2
GSM107100	4	4	4	4	1	4	4	4	4	1	4	4	1	1	1	1	3	4	4	4	4	4	1	4	4
GSM107101	3	3	3	3	3	3	5	3	5	2	3	3	3	5	5	3	3	4	3	3	3	5	3	2	3
GSM107102	3	3	3	3	2	3	5	3	3	2	3	5	3	3	3	3	3	4	3	3	3	5	5	2	4
GSM107103	1	1	1	1	1	1	1	1	1	1	1	1	1	1	1	1	3	1	1	1	1	1	1	1	1
GSM107104	1	1	4	4	1	1	1	1	1	1	1	1	1	1	1	1	3	1	1	4	1	1	1	1	1
GSM107105	1	1	1	1	1	1	1	1	1	1	1	1	1	1	1	1	3	1	1	1	1	1	1	1	1
GSM107106	1	1	1	1	1	1	1	1	1	1	1	1	1	1	1	1	3	1	1	1	1	1	1	1	1
GSM107107	2	2	2	2	2	2	2	2	2	2	2	2	2	2	2	2	5	2	2	2	2	2	2	2	2
GSM107108	1	1	1	1	1	1	1	1	1	1	1	1	1	1	1	1	3	1	1	1	1	1	1	1	1
GSM107109	3	3	3	3	2	3	2	5	3	3	1	3	3	3	3	3	1	3	5	3	3	2	3	4	3
GSM107110	2	2	2	2	2	2	2	2	2	2	1	1	2	2	2	1	3	1	2	2	1	2	1	2	2
GSM107111	1	1	4	4	1	1	1	1	1	1	4	1	1	1	1	1	3	1	1	4	4	1	1	1	1
GSM107112	1	1	1	1	1	1	1	1	1	2	1	1	1	1	1	1	3	1	2	1	1	1	1	1	1
GSM107113	2	2	2	2	2	2	2	2	2	2	2	2	2	2	2	2	3	1	2	2	2	2	2	2	2
GSM107114	1	4	4	4	1	1	1	1	1	1	1	1	1	1	1	1	3	1	1	4	1	1	1	1	1
GSM107115	5	5	5	5	5	5	5	5	5	5	4	5	5	5	5	5	5	4	5	5	4	5	5	4	5
GSM107117	1	1	4	4	1	1	1	1	1	1	1	1	1	1	1	1	1	1	1	4	1	1	1	1	1
GSM107118	1	4	4	4	1	1	1	1	1	1	1	1	1	1	1	1	1	1	1	4	1	1	1	1	1
GSM107119	1	1	1	1	1	1	1	1	1	1	1	1	1	1	1	1	3	1	2	1	1	1	1	1	1
GSM107120	1	1	2	2	1	1	1	1	2	2	1	1	1	1	1	1	3	2	2	2	1	1	1	1	1
GSM107121	2	2	2	2	2	1	2	2	2	1	3	2	2	2	2	2	3	2	2	2	1	2	1	1	1
GSM107122	4	4	4	4	4	4	4	4	1	1	4	4	1	4	4	4	4	4	4	4	4	4	1	4	1
GSM107123	2	2	2	2	2	2	2	2	2	2	2	2	2	2	2	2	2	2	2	2	2	2	2	2	2
GSM107124	1	4	4	4	1	1	1	1	1	1	4	1	1	1	1	1	4	4	1	4	4	1	1	1	1
GSM107125	INC	3	3	3	1	1	1	3	3	1	1	3	1	3	1	1	1	3	2	3	3	1	3	1	1
GSM107126	1	1	4	4	1	1	1	1	1	1	1	1	1	1	1	1	1	1	1	4	1	1	1	1	1
GSM107127	1	1	1	1	1	1	1	1	1	1	1	1	1	1	1	1	3	1	1	1	1	1	1	1	1
GSM107128	1	1	1	1	1	1	1	1	1	1	1	1	1	1	1	1	1	1	2	1	1	1	1	1	1
GSM107129	5	5	5	5	5	5	5	5	5	5	5	5	5	5	5	5	5	4	5	5	5	5	5	5	5
GSM107130	1	1	4	4	1	1	1	1	1	1	1	1	1	1	1	1	3	1	1	4	1	1	1	1	1
GSM107131	5	5	5	5	5	5	5	5	5	5	3	5	5	5	3	5	5	3	2	5	3	5	5	5	5
GSM107132	1	1	4	4	1	1	1	1	1	1	1	1	1	1	1	1	1	1	1	4	1	1	1	1	1
GSM107133	1	1	1	1	1	1	1	2	1	1	1	1	1	1	1	1	3	1	2	1	1	1	1	2	1
GSM107134	1	2	3	3	1	1	1	2	2	1	2	1	1	1	1	1	3	1	2	3	1	1	1	2	2
GSM107135	4	4	4	4	1	4	4	4	4	1	4	4	4	4	1	4	4	4	4	4	4	4	4	4	4
GSM107136	1	4	4	4	1	1	4	1	1	1	4	1	1	1	1	1	4	4	1	4	4	4	1	1	1
GSM107137	1	1	4	4	1	1	1	1	1	1	1	1	1	1	1	1	1	1	1	4	1	1	1	1	1
GSM107138	1	4	4	4	1	1	1	1	1	2	1	1	1	1	1	1	3	1	1	4	1	1	1	1	1
GSM107139	1	4	4	4	1	1	1	1	1	1	1	1	1	1	1	1	1	1	1	4	1	1	1	1	1
GSM107141	5	5	5	5	5	5	5	5	5	5	5	5	5	5	5	5	5	5	5	5	5	5	5	5	5
GSM107142	1	1	1	1	1	1	1	1	1	1	1	1	1	1	1	1	3	1	1	1	1	1	1	1	1
GSM107143	1	1	4	4	1	1	1	1	1	1	1	1	1	1	1	1	3	1	1	4	1	1	1	1	1
GSM107144	4	4	3	3	1	4	4	4	4	1	4	4	1	4	4	1	3	4	4	3	4	4	1	4	1
GSM107145	1	1	4	4	1	1	1	1	1	1	1	1	1	1	1	1	3	1	2	4	1	1	1	1	1
GSM107146	1	4	4	4	1	1	1	1	1	1	1	1	1	1	1	1	3	1	2	4	1	1	1	1	1
GSM107147	1	1	4	4	1	1	1	1	1	1	1	1	1	1	1	1	1	1	1	4	1	1	1	1	1
GSM107148	1	1	1	1	1	1	1	1	1	1	1	1	1	1	1	1	1	1	1	1	1	1	1	1	1
GSM107149	2	2	2	2	2	2	2	2	2	2	2	2	2	2	2	2	1	1	1	2	1	2	2	2	2
GSM107150	1	1	4	4	1	1	1	1	1	1	1	1	1	1	1	1	1	1	1	4	1	1	1	1	1
GSM107151	2	2	2	2	2	2	2	2	2	2	2	2	2	2	2	2	2	2	2	2	2	2	2	1	2
GSM107152	2	2	2	2	2	2	2	2	2	2	1	1	1	2	2	1	1	2	1	2	3	2	2	1	2
GSM107153	1	1	4	4	1	1	1	1	1	1	1	1	1	1	1	1	3	1	1	4	1	1	1	1	1
GSM107155	1	1	4	4	1	1	1	1	1	1	4	1	1	1	1	1	3	4	1	4	4	1	1	1	1
GSM107156	1	1	4	4	1	1	1	1	1	1	4	1	1	1	1	1	4	4	4	4	4	1	1	1	1
GSM107157	1	2	2	2	1	1	1	1	2	2	2	1	1	1	1	2	3	1	2	2	1	1	1	1	2
GSM107158	2	1	2	2	2	2	2	2	2	2	2	2	2	2	2	1	2	2	1	2	1	2	1	2	2
GSM107159	1	4	4	4	1	1	1	1	4	1	4	1	1	1	1	1	3	4	1	4	4	1	1	1	1
GSM107160	2	2	2	2	2	2	2	2	2	2	1	2	2	2	2	2	1	1	2	2	3	2	2	2	2
GSM107161	1	1	1	1	1	1	1	1	1	1	1	1	1	1	1	1	1	1	1	1	1	1	1	1	1
GSM107162	2	1	2	2	2	2	1	2	2	2	1	2	2	2	1	1	3	2	1	2	1	1	2	1	1
GSM107163	2	2	2	2	2	2	2	2	2	2	1	2	2	2	2	2	2	2	2	2	2	2	2	2	2
GSM107164	1	1	4	4	1	1	1	1	1	1	1	1	1	1	1	1	3	1	1	4	1	1	1	1	1
GSM107165	1	4	4	4	1	1	1	1	1	1	1	1	1	1	1	1	3	4	1	4	1	1	1	1	1
GSM107166	INC	2	4	4	5	5	5	5	5	2	4	5	3	2	2	3	5	3	2	4	4	5	2	1	5
GSM107167	1	1	4	4	1	1	1	1	1	1	4	1	1	1	1	1	3	4	1	4	4	1	1	1	1
GSM107168	2	2	2	2	2	2	2	2	2	2	2	2	2	2	2	2	2	2	2	2	2	2	2	2	2
GSM107169	1	4	4	4	1	1	1	1	4	1	1	1	1	1	1	1	1	1	1	4	1	1	1	1	1
GSM107171	1	1	4	4	1	1	1	1	1	1	1	1	1	1	1	1	3	1	1	4	1	1	1	4	1
GSM107172	1	1	4	4	1	1	1	1	1	1	4	1	1	1	1	1	3	4	1	4	4	1	1	1	1
GSM107173	1	1	1	1	1	1	1	1	1	1	1	1	1	1	1	1	1	1	1	1	1	1	1	1	1
GSM107174	1	1	1	1	1	1	1	1	1	1	4	1	1	1	1	1	3	4	1	1	4	1	1	1	1
GSM107175	4	4	4	4	4	4	4	4	4	1	4	4	1	4	4	4	1	4	4	4	4	4	1	4	1
GSM107176	1	4	4	4	1	1	1	1	1	1	1	1	1	1	1	1	1	1	1	4	1	1	1	1	1
GSM107178	2	2	2	2	2	2	2	2	2	2	2	2	2	2	2	2	2	2	2	2	1	2	2	2	2
GSM107179	1	1	1	1	2	2	2	2	2	2	1	1	1	2	2	1	1	1	1	1	1	2	1	2	1
GSM107180	1	1	1	1	1	1	1	1	1	2	1	1	1	1	1	1	1	1	1	1	1	1	1	2	1
GSM107181	1	1	4	4	1	1	1	1	1	1	1	1	1	1	1	1	3	1	1	4	1	1	1	1	1
GSM107182	1	1	1	1	1	1	1	1	1	1	1	1	1	1	1	1	3	1	1	1	1	1	1	1	1
GSM107184	1	1	4	4	1	1	1	1	1	1	1	1	1	1	1	1	3	1	1	4	1	1	1	1	1
GSM107185	1	4	4	4	1	1	4	1	1	1	1	1	1	1	1	1	1	1	1	4	1	4	1	1	1
GSM107186	4	4	4	4	5	4	4	4	5	5	4	4	4	4	1	4	4	4	4	4	4	4	4	4	5
GSM107187	1	4	4	4	1	1	1	1	1	1	4	1	1	1	1	1	3	4	4	4	4	1	1	4	1
GSM107188	1	4	4	4	1	1	1	1	1	1	1	1	1	1	1	1	3	1	1	4	1	1	1	1	1
GSM107189	1	4	4	4	1	1	1	1	1	1	1	1	1	1	1	1	3	4	1	4	1	1	1	1	1
GSM107190	1	4	4	4	1	1	1	1	1	1	4	1	1	1	1	1	4	1	1	4	4	1	1	1	1
GSM107191	5	5	5	5	5	5	5	5	5	5	5	5	5	5	5	5	5	5	5	5	5	5	5	4	5
GSM107192	2	2	2	2	2	2	2	2	2	2	2	2	2	2	2	2	2	2	1	2	2	2	2	2	2
GSM107194	2	2	2	2	2	2	2	2	2	2	2	2	2	2	2	2	2	2	2	2	2	2	2	1	2
GSM107195	5	5	5	5	5	5	5	5	5	5	3	3	5	5	3	4	3	3	3	5	3	5	5	4	3
GSM107196	5	5	5	5	5	5	5	5	5	5	5	5	5	5	5	5	5	5	5	5	5	5	5	5	5
GSM107197	2	2	3	3	2	2	2	2	2	2	2	2	2	2	2	1	3	2	2	3	3	2	1	2	2
GSM107198	5	5	5	5	5	5	5	5	5	5	5	5	5	5	5	5	5	5	5	5	5	5	5	5	5
GSM107199	2	2	2	2	2	2	2	2	2	1	2	2	2	2	2	2	1	2	2	2	2	2	2	1	2
GSM107200	1	1	1	1	1	1	1	1	1	1	1	1	1	2	1	1	1	1	1	1	1	1	1	1	2
GSM107201	2	2	4	4	1	2	2	2	2	2	1	2	1	2	2	1	2	2	1	4	1	2	2	2	2
GSM107202	1	1	1	1	2	1	1	1	1	1	1	1	1	2	2	1	1	1	1	1	1	1	1	1	2
GSM107203	2	2	2	2	1	1	2	2	2	1	1	1	1	2	2	1	2	1	1	2	1	2	1	2	2
GSM107204	5	5	5	5	5	5	5	5	5	2	2	2	2	5	5	5	5	1	2	5	2	5	5	5	4
GSM107205	3	3	3	3	1	3	1	3	1	1	1	4	3	3	1	3	3	3	1	3	1	1	3	1	3
GSM107206	3	3	3	3	3	3	2	3	3	3	3	3	3	2	3	3	3	3	2	3	3	2	3	2	1
GSM107207	1	1	4	4	1	1	1	1	1	1	1	1	1	1	1	1	3	1	2	4	1	1	1	1	1
GSM107208	2	2	3	3	2	2	2	2	3	2	3	2	2	2	3	1	3	2	2	3	1	2	1	1	2
GSM107209	1	1	4	4	1	1	1	1	1	1	4	1	1	1	1	1	3	4	1	4	4	1	1	1	1
GSM107210	INC	2	2	2	1	1	2	2	2	2	1	1	1	1	1	1	3	2	2	2	1	2	1	1	2
GSM107211	1	2	2	2	1	1	1	2	2	1	1	1	1	1	1	1	3	2	2	2	1	1	1	1	1
GSM107212	1	1	1	1	1	1	1	1	1	1	1	1	1	1	1	1	1	1	2	1	1	1	1	1	1
GSM107213	1	1	4	4	1	1	1	1	1	1	1	1	1	1	1	1	3	1	2	4	1	1	1	1	1
GSM107214	1	1	4	4	1	1	1	1	1	1	1	1	1	1	1	1	1	1	1	4	1	1	1	1	1
GSM107215	5	5	5	5	5	5	5	5	5	5	4	5	5	5	4	5	5	5	5	5	4	5	5	4	5
GSM107216	1	1	4	4	1	1	1	1	1	1	1	1	1	1	1	1	3	1	1	4	1	1	1	1	1
GSM107217	5	5	5	5	5	5	5	5	5	2	3	5	5	5	2	5	5	3	5	5	3	5	5	5	5
GSM107218	5	5	5	5	5	5	5	5	5	5	5	5	5	4	4	5	5	5	5	5	5	5	5	5	5
GSM107219	3	3	3	3	2	3	3	3	3	1	1	3	3	2	3	3	3	3	1	3	3	3	3	1	3
GSM107220	2	2	2	2	1	1	2	2	2	2	1	1	1	1	1	1	3	2	2	2	2	2	1	1	2
GSM107221	1	4	4	4	1	1	1	1	1	1	1	1	1	1	1	1	3	1	1	4	1	1	1	1	1
GSM107222	2	1	2	2	1	1	1	2	2	1	2	2	2	2	2	2	2	2	1	2	1	1	2	1	2
GSM107223	4	4	4	4	4	4	4	4	4	1	4	4	1	4	4	4	3	4	4	4	4	4	4	4	1
GSM107224	2	2	2	2	2	2	2	2	2	2	2	2	2	2	2	2	2	2	1	2	1	2	2	2	2
GSM107225	1	1	2	2	1	1	1	1	1	2	1	1	1	1	1	1	3	4	2	2	1	1	1	1	1
GSM107226	2	2	2	2	2	2	2	2	2	2	2	2	2	2	2	2	2	2	2	2	2	2	2	2	2
GSM107227	1	1	1	1	1	1	1	1	2	1	1	1	1	1	1	1	2	1	1	1	1	1	1	1	2
GSM107228	2	2	2	2	2	2	2	2	2	2	2	2	2	2	2	2	5	2	2	2	3	2	2	2	2
GSM107229	5	5	5	5	5	5	5	5	5	5	4	5	5	5	5	5	5	1	2	5	4	5	5	2	2
GSM107230	1	1	1	1	1	1	1	1	1	1	1	1	1	1	1	1	3	1	2	1	1	1	1	1	1
GSM107231	2	2	2	2	1	2	2	2	2	2	2	2	2	2	2	2	5	1	1	2	1	2	4	4	1
GSM136326	5	5	5	5	5	5	5	5	5	2	5	5	5	5	5	5	5	3	5	5	5	5	5	5	5
GSM136327	4	4	4	4	1	4	1	4	4	1	4	1	1	4	1	4	3	4	4	4	4	1	1	4	1
GSM136328	INC	4	4	4	2	1	1	2	2	2	4	1	1	1	1	1	1	4	2	4	4	1	1	2	1
GSM136329	4	4	4	4	5	4	4	4	4	1	4	5	4	4	3	4	5	4	4	4	4	4	4	5	5
GSM136330	4	4	4	4	5	5	5	5	5	4	4	4	4	4	4	5	5	4	4	4	4	5	4	1	5
GSM136331	5	5	5	5	5	5	5	5	5	5	5	5	5	5	5	5	5	4	5	5	5	5	5	5	5
GSM136335	5	5	5	5	5	5	5	5	5	5	5	5	5	5	5	5	5	5	5	5	5	5	5	5	5
GSM136337	4	4	4	4	4	4	4	4	4	1	4	1	4	4	4	4	4	4	4	4	4	4	4	4	1
GSM136338	5	5	5	5	5	5	5	5	5	5	5	5	5	5	1	5	5	5	5	5	5	5	5	5	5
GSM136339	INC	4	4	4	3	3	5	5	4	1	4	4	5	2	3	3	5	4	4	4	4	5	1	2	5
GSM136340	5	5	5	5	5	5	5	5	5	5	4	5	5	5	1	5	5	5	5	5	4	5	5	1	5
GSM136341	4	4	4	4	5	4	4	4	4	1	4	4	5	4	4	4	5	4	4	4	4	4	4	4	5
GSM136342	1	1	1	1	1	1	1	1	2	1	1	1	2	1	1	1	1	1	1	1	1	1	1	2	1
GSM136343	5	5	5	5	5	5	5	5	5	1	4	2	2	5	5	5	5	1	2	5	2	5	2	1	4
GSM136344	1	4	4	4	1	1	1	1	1	1	1	1	1	1	1	4	1	4	1	4	1	1	1	4	1
GSM136345	1	1	1	1	1	1	1	1	1	1	1	1	1	1	1	1	2	2	1	1	2	1	1	2	1
GSM136346	5	5	5	5	5	5	5	5	5	5	1	2	2	5	5	5	5	4	5	5	4	5	5	4	4
GSM136347	2	2	2	2	2	1	3	2	2	2	1	2	2	2	3	2	2	2	1	2	1	3	2	3	1
GSM136348	2	2	2	2	2	2	2	2	2	2	3	2	2	2	2	2	5	2	2	2	4	2	2	5	2
GSM136349	4	4	4	4	5	4	4	4	4	1	4	1	4	4	4	1	5	4	1	4	4	4	1	4	1
GSM136350	INC	1	2	2	2	1	1	2	2	1	3	2	2	1	2	1	1	2	2	2	1	1	1	1	1
GSM136351	1	4	4	4	2	1	1	2	1	1	1	1	2	2	1	1	3	4	2	4	1	1	1	1	1
GSM136352	5	5	5	5	5	5	5	5	5	2	4	5	3	2	2	5	5	3	4	5	4	5	3	5	5
GSM136353	2	2	2	2	2	2	2	2	2	2	2	2	2	2	2	2	2	3	2	2	2	2	2	2	2
GSM136354	1	1	1	1	1	1	1	1	1	1	1	1	1	1	1	1	1	1	1	1	1	1	1	1	1
GSM136355	1	1	1	1	1	1	1	1	2	2	1	1	1	1	1	1	3	2	2	1	1	1	1	1	2
GSM136356	4	4	4	4	5	4	4	5	5	4	4	4	4	5	4	4	5	4	4	4	4	4	4	4	5
GSM136357	4	4	4	4	4	4	4	4	4	1	4	1	1	4	1	4	5	4	4	4	4	4	4	4	1
GSM136358	4	4	4	4	1	4	4	4	4	4	1	4	1	4	1	4	3	4	2	4	3	4	4	1	4
GSM136359	1	1	1	1	1	1	1	1	1	1	4	1	1	1	1	1	3	1	1	1	4	1	1	1	1
GSM136360	INC	3	3	3	1	4	4	5	5	2	3	5	5	5	4	5	5	4	5	3	3	4	4	4	3
GSM136361	1	4	4	4	1	1	4	1	1	1	1	1	1	1	1	1	3	1	1	4	1	4	1	1	1
GSM136362	1	4	4	4	1	1	1	1	1	1	4	1	1	4	1	1	4	4	4	4	4	1	1	1	1
GSM136363	1	1	1	1	1	1	1	1	1	1	1	1	1	1	1	1	3	1	2	1	1	1	1	1	1
GSM136364	INC	4	4	4	5	5	5	5	5	1	4	4	4	5	2	4	5	4	4	4	4	5	4	2	5
GSM136365	5	5	5	5	5	5	5	5	5	1	4	4	5	4	5	4	5	4	5	5	4	5	4	4	4
GSM136366	1	4	4	4	1	1	1	1	1	1	2	1	1	1	1	1	3	1	2	4	4	1	1	1	1
GSM136367	INC	4	4	4	5	5	4	4	5	1	1	1	2	4	1	1	5	4	4	4	1	4	4	4	1
GSM136368	5	5	5	5	5	5	5	5	5	5	5	5	5	5	5	5	5	4	5	5	5	5	5	5	5
GSM136369	3	3	3	3	3	3	3	3	3	3	3	3	3	3	3	1	3	4	1	3	3	3	3	3	3
GSM136370	4	4	4	4	5	4	4	4	4	4	4	1	1	4	4	4	5	4	2	4	4	4	4	4	4
GSM136371	3	3	3	3	3	3	3	3	5	3	4	4	3	3	3	3	5	4	4	3	4	3	5	2	5
GSM136372	INC	4	4	4	1	1	4	1	5	1	1	1	1	1	1	1	5	4	4	4	4	4	4	1	4
GSM136373	4	4	4	4	1	4	4	4	4	1	4	1	1	4	4	1	3	1	4	4	4	4	4	4	4
GSM136374	5	5	5	5	5	5	5	5	5	5	5	5	5	5	5	5	5	5	5	5	5	5	5	5	5
GSM136375	4	4	4	4	1	4	4	4	4	1	4	1	4	4	1	1	4	4	4	4	4	4	1	4	1
GSM136376	1	4	4	4	1	4	1	1	4	1	4	2	1	1	1	1	2	4	4	4	1	1	1	1	1
GSM136377	5	5	5	5	5	5	5	5	5	5	5	5	5	5	1	5	5	5	5	5	5	5	5	5	5
GSM136378	INC	4	4	4	5	5	5	5	5	4	4	5	4	2	4	4	1	4	5	4	4	5	4	1	5
GSM136379	5	5	5	5	5	5	5	5	5	5	5	5	5	5	5	5	5	5	5	5	5	5	5	5	5
GSM136381	1	2	2	2	1	1	1	1	2	1	1	1	1	1	2	1	2	1	2	2	2	1	1	1	2
GSM136382	1	1	1	1	1	1	1	1	1	1	1	1	1	1	1	1	4	1	1	1	1	1	1	4	1
GSM136383	5	5	5	5	5	5	5	5	5	5	5	5	5	5	5	5	5	5	5	5	5	5	5	5	5
GSM136384	INC	3	3	3	2	5	5	5	1	1	5	3	1	4	2	1	5	5	1	3	3	5	5	5	4
GSM136386	5	3	4	4	5	5	5	5	5	1	5	5	5	2	2	3	5	4	5	4	5	5	5	2	5
GSM136387	5	5	5	5	5	5	5	5	5	2	5	5	5	5	5	5	1	5	5	5	5	5	5	1	5
GSM136388	1	1	1	1	1	1	1	1	1	1	1	1	1	1	1	1	2	1	1	1	1	1	1	1	1
GSM136389	4	4	4	4	4	4	4	4	4	1	4	4	5	4	1	4	5	4	4	4	4	4	4	4	5
GSM136390	1	1	1	1	1	1	1	1	2	1	1	1	1	1	1	1	1	1	1	1	1	1	1	4	1
GSM136391	5	5	5	5	5	5	5	5	5	2	4	2	2	5	5	5	1	1	2	5	2	5	5	1	4
GSM136392	1	1	1	1	1	1	1	1	1	1	1	1	1	1	1	1	3	4	2	1	1	1	1	1	1
GSM136393	1	1	1	1	1	1	1	1	1	2	1	1	1	1	1	1	1	2	1	1	1	1	1	1	1
GSM136394	5	5	5	5	5	5	5	5	5	5	4	2	2	5	5	5	5	1	5	5	2	5	5	4	4
GSM136395	2	2	2	2	1	3	2	2	2	2	2	2	2	3	1	2	2	2	2	2	1	2	2	1	2
GSM136396	2	2	2	2	2	2	2	2	2	2	2	2	2	2	2	2	2	2	2	2	2	2	2	2	2
GSM136397	1	1	1	1	1	1	1	1	1	1	1	1	1	1	1	1	1	1	2	1	1	1	1	1	1
GSM136398	2	2	2	2	2	2	2	2	2	1	3	2	2	2	2	2	1	2	2	2	1	2	2	2	2
GSM136399	1	4	4	4	1	1	1	1	1	1	2	1	1	4	1	1	3	4	2	4	4	1	1	4	1
GSM136401	2	2	2	2	2	2	2	2	2	2	2	2	2	2	2	2	2	2	2	2	2	2	2	2	2
GSM136402	1	1	1	1	1	1	1	1	1	1	1	1	1	1	1	1	1	1	1	1	1	1	1	1	1
GSM136403	1	2	1	1	1	1	1	1	2	2	1	1	1	1	1	1	2	2	2	1	1	1	1	1	2
GSM136404	INC	4	4	4	5	5	5	5	5	1	4	4	3	2	2	3	1	4	4	4	4	5	5	2	5
GSM136405	4	4	4	4	1	4	4	4	4	4	4	1	1	4	1	2	3	4	4	4	4	4	1	4	4
GSM136406	4	3	4	4	1	4	4	4	3	3	4	4	4	4	4	5	3	1	3	4	3	4	4	4	3
GSM136407	1	1	1	1	1	1	1	1	1	1	1	1	1	2	1	1	2	2	1	1	1	1	1	2	2
GSM136408	5	3	5	5	1	4	5	5	5	5	3	5	5	5	4	5	5	4	5	5	3	5	5	4	3
GSM136409	4	4	4	4	1	4	4	4	4	1	4	1	1	4	4	4	3	4	1	4	4	4	4	1	1
GSM136410	1	1	1	1	1	1	1	1	1	1	1	1	2	2	1	1	2	2	2	1	2	1	1	2	1
GSM136411	1	1	1	1	1	1	1	1	1	1	1	1	1	1	1	1	1	2	2	1	1	1	1	1	1
GSM136412	4	4	4	4	5	5	5	5	4	4	4	4	5	4	4	5	5	4	4	4	4	5	4	2	5
GSM136413	4	4	4	4	5	4	4	4	4	4	4	4	1	4	4	4	5	4	4	4	4	4	4	4	4
GSM136414	2	2	2	2	2	2	2	2	2	2	2	2	2	2	2	2	2	2	2	2	1	2	1	2	2
GSM136415	5	4	5	5	5	5	5	5	5	5	4	5	5	5	4	5	5	4	4	5	4	5	5	4	5
GSM136416	5	5	5	5	5	5	5	5	5	5	5	5	5	5	5	5	5	4	5	5	5	5	5	5	5
GSM136417	3	3	3	3	3	3	3	3	3	2	3	3	3	3	3	3	3	3	3	3	3	3	3	2	1
GSM136418	5	5	5	5	5	5	5	5	5	5	5	5	5	5	5	5	5	4	5	5	5	5	5	4	5
GSM136419	3	3	3	3	3	3	2	3	3	3	3	3	5	3	3	3	3	5	2	3	3	2	3	3	3
GSM136420	INC	3	3	3	2	3	2	5	3	1	4	2	3	4	2	2	3	4	2	3	1	2	3	3	2
GSM150794	1	1	1	1	1	1	1	1	1	1	1	1	1	1	1	1	1	1	1	1	1	1	1	1	1
GSM150795	4	4	4	4	4	4	4	4	4	4	4	4	4	4	4	4	4	4	4	4	4	4	4	4	4
GSM150796	INC	3	3	3	1	1	1	1	2	2	3	3	1	3	1	1	1	3	2	3	3	1	3	2	1
GSM150797	4	4	4	4	5	4	4	4	4	4	4	4	4	4	4	4	1	4	4	4	4	4	4	4	1
GSM150798	4	4	4	4	4	4	4	4	4	1	4	4	4	4	1	4	4	4	4	4	4	4	4	4	4
GSM150799	1	4	4	4	1	1	1	1	1	1	1	1	1	1	1	1	1	1	1	4	1	1	1	1	1
GSM150800	4	4	4	4	1	4	4	4	4	1	4	1	4	1	1	1	4	4	4	4	4	4	1	4	4
GSM150801	4	4	4	4	4	4	4	4	4	1	4	4	1	4	1	4	1	4	4	4	4	4	1	4	1
GSM150802	1	1	1	1	1	1	1	1	1	2	1	1	1	1	1	1	2	1	1	1	1	1	1	1	1
GSM150803	1	4	4	4	1	1	4	1	1	1	4	1	1	1	1	1	4	4	1	4	4	4	1	1	1
GSM150804	INC	3	3	3	1	4	5	3	1	1	1	4	5	4	1	3	3	4	1	3	3	5	1	4	3
GSM150805	3	3	3	3	3	3	3	3	3	3	3	3	3	3	3	3	3	3	3	3	3	3	3	3	3
GSM150943	1	4	4	4	1	1	1	1	1	1	4	1	1	1	1	1	3	4	1	4	4	1	1	4	1
GSM150944	1	4	4	4	1	1	1	1	4	1	1	1	1	1	1	4	3	4	4	4	4	1	1	4	1
GSM150945	2	2	2	2	1	1	2	2	2	2	1	2	1	2	2	2	2	2	2	2	1	2	2	2	2
GSM150946	2	2	2	2	2	2	2	2	2	2	2	2	2	2	2	2	2	2	2	2	2	2	2	2	2
GSM150947	1	1	1	1	1	1	1	1	1	2	1	1	1	1	1	1	1	1	1	1	1	1	1	1	1
GSM150948	1	1	1	1	1	1	1	1	1	1	1	1	1	1	1	1	1	1	1	1	1	1	1	1	1
GSM150949	1	1	2	2	1	1	1	1	1	2	1	1	1	1	1	1	3	4	2	2	1	1	1	1	1
GSM150950	2	2	2	2	2	2	2	2	2	2	2	2	2	2	2	2	2	2	2	2	2	2	2	2	2
GSM150951	2	2	2	2	1	1	2	2	2	2	1	2	1	1	1	1	3	2	2	2	1	2	1	1	2
GSM150952	1	1	4	4	1	1	1	1	2	2	1	1	1	1	1	1	1	1	2	4	1	1	1	1	1
GSM150953	1	1	4	4	1	1	1	1	1	1	1	1	1	1	1	1	1	1	1	4	1	1	1	1	1
GSM150954	INC	4	4	4	1	1	1	1	4	1	4	4	1	1	1	1	3	4	4	4	4	1	1	4	1
GSM150955	1	1	2	2	1	1	1	1	1	2	1	1	1	1	1	1	3	1	2	2	1	1	1	1	2
GSM150956	2	2	2	2	2	2	2	2	2	2	2	2	2	2	2	2	3	4	1	2	2	2	2	2	2
GSM150957	1	2	4	4	1	1	1	1	2	1	1	1	1	1	1	1	2	1	1	4	1	1	1	1	1
GSM150958	1	4	4	4	1	1	1	1	1	1	4	1	1	1	1	1	3	4	4	4	4	1	1	4	1
GSM150959	1	1	2	2	1	1	1	1	1	2	1	1	1	2	1	1	1	1	1	2	1	1	1	2	2
GSM150960	2	2	2	2	2	2	2	2	2	2	2	2	2	2	2	2	2	2	1	2	1	2	2	2	2
GSM150961	2	2	2	2	2	2	2	2	2	2	1	2	2	2	2	2	5	4	2	2	2	2	1	2	2
GSM150962	2	2	2	2	2	2	2	2	2	2	1	1	1	2	2	2	2	2	2	2	1	2	1	2	2
GSM150963	1	4	4	4	1	1	1	1	1	1	1	1	1	1	1	1	3	4	1	4	4	1	1	1	1
GSM150964	1	2	2	2	1	1	1	1	1	2	1	1	1	1	1	2	2	1	1	2	1	1	1	2	2
GSM150965	1	4	4	4	1	1	1	1	2	2	1	1	1	1	1	1	3	4	4	4	4	1	1	4	1
GSM150966	INC	2	2	2	1	1	1	1	2	2	2	1	1	1	1	1	3	4	2	2	1	1	1	2	2
GSM150967	1	2	2	2	1	1	1	2	1	2	1	2	1	2	1	1	2	1	1	2	2	1	1	1	1
GSM150968	1	1	4	4	1	1	1	1	1	1	1	1	1	1	1	1	3	1	1	4	1	1	1	1	1
GSM150969	2	2	2	2	2	1	2	2	2	2	2	2	2	1	2	2	1	2	2	2	1	2	1	2	2
GSM150970	2	2	2	2	2	2	2	2	2	2	3	2	2	2	2	2	1	4	2	2	2	2	1	2	2
GSM150971	2	2	2	2	2	2	2	2	2	2	2	2	2	2	2	2	2	2	2	2	1	2	2	2	2
GSM150972	1	2	2	2	1	1	1	1	1	1	2	1	1	1	1	1	3	1	2	2	2	1	2	1	2
GSM150973	1	1	1	1	1	1	1	1	1	1	1	1	1	1	1	1	1	1	1	1	1	1	1	1	1
GSM150974	1	1	1	1	1	1	1	1	1	1	1	1	1	1	1	1	1	1	2	1	1	1	1	1	1
GSM150975	2	2	2	2	1	1	2	2	1	1	1	1	1	2	2	2	2	2	2	2	1	2	1	2	2
GSM150976	2	2	2	2	2	2	2	2	2	2	1	2	1	2	2	2	2	2	1	2	1	2	2	2	2
GSM150977	2	2	2	2	2	2	2	2	2	1	1	2	1	2	2	2	2	2	2	2	2	2	1	1	2
GSM150978	1	4	4	4	1	1	1	1	1	1	1	1	1	1	1	1	3	4	1	4	4	1	1	1	1
GSM150979	1	1	4	4	1	1	1	1	1	1	1	1	1	1	1	1	3	4	1	4	4	1	1	1	1
GSM150980	1	1	4	4	1	1	1	1	1	1	1	1	1	1	1	1	3	1	1	4	1	1	1	1	1
GSM150981	1	1	4	4	1	1	1	1	1	1	1	2	2	2	2	1	1	1	1	1	1	1	1	2	2
GSM150982	INC	2	1	1	1	2	1	2	2	1	1	2	1	2	2	2	1	2	2	1	1	1	1	2	2
GSM150983	2	2	2	2	2	2	2	2	2	1	2	2	2	2	2	2	2	2	2	2	2	2	2	2	2
GSM150984	INC	2	2	2	1	1	1	2	2	1	1	2	1	1	1	1	3	4	2	2	1	1	1	2	2
GSM150985	1	2	2	2	1	1	1	1	1	1	2	1	1	1	1	1	3	4	2	2	2	1	2	1	2
GSM150986	1	4	4	4	1	1	1	1	1	1	1	1	1	1	1	1	5	4	2	4	2	1	1	1	1
GSM150987	1	1	1	1	1	1	1	1	1	1	1	1	1	1	1	1	3	1	2	1	1	1	1	1	2
GSM150988	2	2	2	2	2	2	2	2	2	2	2	2	2	2	2	2	2	2	2	2	1	2	2	1	2
GSM150989	1	2	1	1	1	1	1	1	2	1	1	2	2	1	2	1	1	1	1	1	1	1	1	2	2
GSM150990	1	1	1	1	1	1	1	1	1	1	1	1	1	1	1	1	1	1	1	1	1	1	1	2	2
GSM150991	2	2	2	2	1	1	2	2	2	1	1	2	2	1	2	2	3	2	2	2	1	2	1	2	2
GSM150992	1	4	4	4	1	1	1	1	2	1	1	1	1	1	1	1	3	4	2	4	1	1	1	4	1
GSM150993	1	1	1	1	1	1	1	1	1	1	2	1	1	1	1	1	1	1	1	1	1	1	1	2	2
GSM150994	1	1	1	1	1	1	1	1	1	2	1	1	1	1	1	1	1	1	1	1	1	1	1	1	2
GSM150995	1	4	4	4	1	1	1	1	1	1	2	1	1	1	1	1	3	4	2	4	4	1	1	4	1
GSM150996	2	2	2	2	2	2	2	2	2	2	1	2	2	2	2	2	2	2	2	2	2	2	2	2	2
GSM150997	1	4	3	3	1	1	1	1	1	1	1	1	1	1	1	1	3	4	2	3	4	1	1	1	1
GSM150998	INC	2	2	2	1	1	2	2	1	1	1	1	1	1	2	1	1	2	2	2	1	2	1	2	2
GSM150999	2	2	2	2	2	2	2	2	2	2	3	2	2	1	2	2	3	4	2	2	2	2	2	2	2
GSM151000	1	1	1	1	1	1	1	1	1	1	4	1	1	1	1	1	3	4	2	1	4	1	1	4	1
GSM151001	2	2	2	2	1	2	2	2	1	1	2	1	2	2	2	1	2	1	1	2	1	2	2	2	1
GSM151002	1	2	2	2	1	2	1	2	1	1	2	2	1	1	2	2	2	1	1	2	1	1	1	1	1
GSM151003	1	1	1	1	1	1	1	1	1	1	1	1	1	1	1	1	2	1	1	1	1	1	1	1	1
GSM151004	2	2	2	2	1	1	2	2	2	2	2	1	1	1	2	1	2	1	2	2	2	2	2	1	2
GSM151005	1	1	1	1	1	1	1	1	1	1	1	1	1	1	1	1	3	4	2	1	4	1	1	1	1
GSM151006	1	1	2	2	1	1	1	1	2	1	1	1	1	1	1	2	2	1	1	2	1	1	1	2	1
GSM151007	1	1	1	1	1	1	1	1	1	1	1	1	1	1	1	1	1	1	1	1	1	1	1	1	1
GSM151008	1	3	3	3	1	1	1	2	2	1	1	1	1	1	1	1	3	4	2	3	1	1	1	2	1
GSM151009	1	1	4	4	1	1	1	1	1	1	1	1	1	1	1	1	3	1	1	4	4	1	1	1	1
GSM151010	1	4	4	4	1	1	1	1	1	1	1	1	1	1	1	1	3	4	2	4	4	1	1	1	1
GSM151011	1	1	1	1	1	1	1	2	2	1	2	2	1	2	2	1	1	1	1	1	1	1	1	1	2
GSM151012	5	5	5	5	5	5	5	5	5	5	5	5	5	5	5	5	5	5	5	5	5	5	5	5	5
GSM151013	1	2	2	2	1	1	1	1	2	2	1	2	1	2	1	1	1	1	1	2	1	1	2	1	2
GSM151014	1	1	1	1	1	1	1	1	1	1	1	1	1	1	1	1	1	1	1	1	1	1	1	1	1
GSM151015	3	3	3	3	3	3	3	3	3	3	3	3	3	3	3	3	3	3	3	3	3	3	3	2	3
GSM151016	4	4	4	4	1	4	4	4	4	1	4	1	1	1	1	4	3	1	4	4	4	4	1	4	4
GSM151017	1	1	1	1	1	1	1	1	1	1	1	1	1	1	1	1	3	1	1	1	1	1	1	1	1
GSM151018	1	1	1	1	1	1	1	1	1	1	1	1	1	2	1	1	1	1	1	1	1	1	1	2	1
GSM151019	2	2	2	2	2	2	2	2	2	1	2	2	2	2	2	2	2	2	2	2	2	2	2	2	2
GSM151020	2	2	2	2	2	2	2	2	2	2	2	2	2	2	2	2	2	2	1	2	2	2	2	2	2
GSM151021	1	1	1	1	1	1	1	1	1	1	1	1	1	1	1	1	3	1	1	1	1	1	1	1	1
GSM151022	1	1	1	1	1	1	1	2	2	2	2	1	1	2	2	1	2	2	1	1	1	1	1	2	1
GSM151023	2	2	2	2	2	2	2	2	2	2	2	2	2	2	2	2	2	2	1	2	1	2	2	2	2
GSM151024	1	1	1	1	1	1	1	1	1	1	1	1	1	1	1	1	1	2	2	1	1	1	1	1	1
GSM151025	1	1	1	1	1	1	1	1	1	2	1	1	1	1	1	1	1	1	1	1	2	1	1	1	1
GSM151026	2	2	2	2	1	2	2	2	2	2	2	2	2	2	2	2	2	2	1	2	1	2	2	1	2
GSM151027	1	4	4	4	1	1	1	1	4	1	1	1	1	1	1	1	3	1	1	4	1	1	1	1	1
GSM151028	1	1	1	1	1	1	1	1	2	1	1	1	1	1	1	1	1	1	1	1	1	1	1	1	1
GSM151029	1	2	2	2	1	1	1	1	2	1	1	1	1	2	1	2	2	2	2	2	1	1	1	1	2
GSM151030	2	2	2	2	2	3	2	3	2	2	1	3	3	2	3	3	2	3	5	2	3	2	2	2	3
GSM151031	2	2	2	2	2	2	2	2	2	2	2	2	2	2	2	2	2	2	2	2	2	2	2	2	2
GSM151032	INC	4	4	4	1	3	2	3	3	2	4	5	3	3	1	1	1	4	4	4	4	2	1	5	3
GSM151033	1	4	4	4	1	1	1	1	1	1	4	1	1	1	1	1	4	4	4	4	4	1	1	4	1
GSM151034	1	4	4	4	1	1	1	1	1	1	4	1	1	1	1	1	4	4	1	4	4	1	1	1	1
GSM151035	1	1	1	1	1	1	1	1	1	1	1	1	1	1	1	1	1	1	1	1	1	1	1	1	1
GSM151036	1	1	1	1	1	1	1	1	1	1	1	1	1	1	1	1	3	1	2	1	1	1	1	3	1
GSM151037	2	2	2	2	2	2	2	2	2	1	2	2	2	2	2	2	2	2	2	2	2	2	2	1	2
GSM151038	2	2	2	2	2	2	2	2	2	2	1	1	1	2	2	2	2	2	2	2	1	2	1	1	2
GSM151039	1	2	1	1	1	1	1	1	1	1	1	1	1	1	1	1	2	1	1	1	1	1	2	2	2
GSM151040	INC	3	3	3	5	5	5	3	5	5	5	5	5	4	5	3	3	4	5	3	5	5	4	4	4
GSM151041	1	1	1	1	1	1	1	1	1	1	1	1	1	1	1	1	2	1	1	1	1	1	1	1	1
GSM151042	2	2	2	2	1	2	2	2	2	2	1	1	1	2	2	1	2	1	2	2	1	2	2	2	2
GSM151043	1	2	1	1	1	1	1	1	1	1	1	1	2	1	1	1	2	1	2	1	1	1	2	1	1
GSM151044	1	1	1	1	1	1	1	1	1	1	1	1	1	1	1	1	1	1	1	1	1	1	1	1	1
GSM151045	3	3	3	3	1	3	5	3	3	3	3	3	1	3	5	3	3	4	2	3	3	5	3	3	3
GSM151046	3	3	3	3	1	3	5	3	3	3	3	3	3	5	3	5	3	3	2	3	3	5	4	4	3
GSM151047	1	1	1	1	1	1	1	1	1	1	1	1	1	1	1	1	1	1	1	1	1	1	1	1	1
GSM151048	1	1	1	1	1	1	1	1	1	1	1	1	1	1	1	1	1	1	1	1	1	1	1	1	1
GSM151049	3	2	3	3	3	3	2	3	5	2	3	3	3	2	2	2	2	3	3	3	3	2	3	2	3
GSM151050	2	1	2	2	1	1	1	1	1	1	2	2	2	2	1	2	2	2	2	2	1	1	2	1	2
GSM151051	INC	4	4	4	1	4	1	4	4	1	1	4	1	4	1	1	3	4	2	4	3	1	1	1	3
GSM151052	1	1	1	1	1	1	1	1	1	1	1	1	1	1	1	1	2	2	1	1	1	1	1	1	1
GSM151053	1	4	4	4	1	1	1	1	1	1	1	1	1	1	1	1	3	1	1	4	1	1	1	1	1
GSM151054	1	1	1	1	1	1	1	1	1	1	1	1	1	1	1	1	3	1	1	1	1	1	1	1	1
GSM151055	1	1	1	1	1	1	1	1	1	1	1	1	1	1	1	1	1	1	1	1	1	1	1	1	1
GSM151056	1	2	1	1	1	1	1	1	1	2	1	1	1	1	1	1	2	1	1	1	1	1	2	2	2
GSM151057	2	2	2	2	2	2	2	2	2	2	2	2	2	2	2	2	2	2	2	2	2	2	2	1	2
GSM151058	1	4	4	4	1	1	1	1	1	1	1	1	1	1	1	1	2	4	1	4	1	1	1	4	1
GSM151059	1	1	1	1	1	1	1	1	1	1	1	1	1	1	1	1	2	1	1	1	1	1	1	1	1
GSM151060	1	2	4	4	1	1	1	1	1	1	1	1	1	1	1	1	1	1	1	4	1	1	1	1	1
GSM151061	3	3	3	3	3	3	2	3	3	2	3	3	3	3	3	3	2	3	3	3	3	2	2	2	3
GSM151062	1	1	1	1	1	1	1	1	1	1	1	1	1	1	1	1	1	1	1	1	1	1	1	1	1
GSM151063	1	4	4	4	1	1	1	1	1	1	4	1	1	1	1	1	3	4	2	4	1	1	1	1	4
GSM151064	2	2	2	2	2	2	2	2	2	2	2	2	1	2	2	2	1	2	2	2	3	2	2	3	2
GSM151065	1	1	2	2	1	1	1	1	1	1	1	2	2	1	1	1	1	1	1	2	1	1	2	1	1
GSM151066	1	2	2	2	1	1	2	1	1	1	1	1	1	1	1	1	2	2	2	2	1	2	2	1	2
GSM151067	INC	2	3	3	1	1	4	2	4	1	1	2	2	3	3	1	3	1	2	3	1	4	1	5	1
GSM151068	1	1	1	1	1	1	1	1	1	1	1	1	1	1	1	1	1	1	1	1	1	1	1	1	1
GSM177885	INC	3	3	3	2	3	5	3	5	2	4	4	2	2	3	5	3	4	2	3	4	5	5	1	3
GSM177886	2	2	2	2	2	2	2	2	2	2	2	2	2	2	2	2	2	2	2	2	2	2	2	2	2
GSM177887	5	5	5	5	5	5	5	5	5	5	4	5	5	5	5	5	5	4	3	5	4	5	5	4	5
GSM177888	2	2	2	2	2	2	2	2	2	2	2	2	2	2	2	2	2	4	1	2	1	2	2	2	2
GSM177889	2	2	2	2	1	2	2	2	2	2	2	2	1	2	2	2	2	2	2	2	1	2	2	2	2
GSM177890	1	4	4	4	1	1	4	1	1	1	1	1	1	4	1	1	3	4	1	4	4	4	1	1	1
GSM177891	5	5	5	5	5	5	5	5	5	5	5	5	5	5	5	5	5	5	5	5	5	5	5	5	5
GSM177892	1	4	4	4	1	1	1	1	1	1	4	1	1	1	1	1	3	4	4	4	4	1	1	4	1
GSM177893	2	2	2	2	2	2	2	2	2	2	2	2	2	2	2	1	2	2	1	2	1	2	2	2	2
GSM177894	1	2	4	4	1	1	1	1	1	1	3	1	1	1	1	1	3	4	4	4	4	1	1	4	1
GSM177895	2	2	2	2	2	1	2	2	2	1	2	2	1	1	2	1	3	1	2	2	1	2	2	1	1
GSM177896	1	1	1	1	1	1	1	1	1	2	1	1	1	1	1	1	3	4	2	1	4	1	1	1	1
GSM177897	5	5	5	5	5	5	5	5	5	5	5	5	5	5	5	5	5	5	5	5	5	5	5	5	5
GSM177898	4	4	4	4	1	1	4	4	4	2	1	4	1	4	4	4	3	4	2	4	4	4	4	4	3
GSM177899	5	5	5	5	5	5	5	5	5	5	3	5	5	5	5	3	5	4	3	5	3	5	5	4	5
GSM177900	2	2	2	2	2	2	1	2	1	2	1	2	2	1	1	2	3	2	2	2	1	1	2	1	2
GSM177901	INC	5	3	3	1	4	5	1	4	2	1	1	1	4	1	5	5	1	2	3	2	5	2	5	4
GSM177902	3	3	3	3	1	3	3	3	3	3	1	4	1	3	1	3	3	3	2	3	1	3	3	2	3
GSM177903	INC	3	3	3	1	3	5	3	5	2	4	4	2	2	4	3	5	4	2	3	4	5	3	2	5
GSM177904	1	1	1	1	1	1	1	1	1	1	1	1	1	1	1	1	3	1	1	1	1	1	1	4	1
GSM177905	1	4	4	4	1	1	1	1	1	1	1	1	1	1	1	1	3	4	2	4	4	1	1	1	4
GSM177906	5	5	5	5	5	5	5	5	5	5	5	5	5	5	3	5	5	5	5	5	5	5	5	3	5
GSM177907	1	4	4	4	1	1	1	1	1	1	1	1	1	1	1	1	4	4	4	4	4	1	1	4	1
GSM177908	2	2	2	2	1	2	2	2	2	2	1	1	1	2	2	2	2	2	1	2	1	2	2	4	2
GSM177909	5	5	5	5	5	5	5	5	5	5	5	5	5	5	5	5	5	5	5	5	5	5	5	3	5
GSM177910	2	1	2	2	1	1	1	2	2	2	1	2	2	2	1	1	3	2	2	2	1	1	2	1	2
GSM177911	1	4	4	4	1	1	1	1	1	1	1	1	1	1	1	1	1	1	1	4	1	1	1	1	1
GSM177913	5	5	5	5	5	5	5	5	5	5	5	5	5	5	5	5	5	5	5	5	5	5	5	4	5
GSM177914	1	1	4	4	1	1	1	1	1	1	1	1	1	1	1	1	4	1	1	4	1	1	1	2	1
GSM177915	2	2	2	2	2	2	2	2	2	1	1	2	2	1	2	2	3	3	2	2	1	2	1	1	2
GSM177916	2	2	2	2	1	2	2	2	2	1	2	2	1	1	2	1	2	1	2	2	1	2	2	2	2
GSM177917	2	2	2	2	2	1	2	1	2	2	2	2	2	2	1	2	2	2	1	2	1	2	2	5	2
GSM177918	3	3	3	3	1	3	3	3	3	1	4	4	3	3	3	4	4	4	4	3	4	3	3	1	3
GSM177919	1	1	1	1	1	1	1	1	1	1	1	1	1	1	1	1	1	1	1	1	1	1	1	2	1
GSM177920	2	2	2	2	2	2	2	2	2	2	2	2	2	2	2	1	3	4	2	2	2	2	2	2	2
GSM177921	1	1	4	4	1	1	1	1	1	1	1	1	1	1	1	1	3	1	1	4	1	1	1	1	1
GSM177922	1	1	4	4	1	1	1	1	2	1	1	1	1	4	1	1	3	4	2	4	4	1	1	1	1
GSM177923	5	5	5	5	5	5	5	5	5	5	5	5	5	5	5	5	5	4	5	5	5	5	5	4	5
GSM177924	1	1	1	1	1	1	1	1	1	2	1	1	1	2	1	1	3	4	2	1	1	1	1	1	2
GSM177925	5	5	5	5	5	5	5	5	5	5	5	5	5	5	5	5	5	5	5	5	5	5	5	4	5
GSM177926	2	2	2	2	2	2	2	2	2	2	2	2	2	2	2	2	2	2	2	2	2	2	2	2	2
GSM177927	3	3	3	3	2	3	3	3	3	2	1	3	2	3	3	2	3	4	2	3	3	3	3	3	3
GSM177928	INC	2	2	2	1	1	1	1	2	1	3	2	2	2	1	2	3	4	2	2	1	1	1	2	2
GSM177929	2	2	2	2	2	2	2	2	2	2	2	2	2	2	2	2	3	4	2	2	2	2	2	2	2
GSM177930	1	4	4	4	1	1	1	1	1	1	4	1	1	1	1	1	4	4	4	4	4	1	1	4	1
GSM177931	1	4	4	4	1	1	1	1	1	1	1	1	1	1	1	1	3	4	4	4	4	1	1	1	1
GSM177932	1	4	4	4	1	1	1	1	1	2	1	1	1	1	1	1	3	1	1	4	1	1	1	1	1
GSM177933	2	2	4	4	1	2	2	2	2	2	2	2	1	2	2	2	2	2	2	2	2	2	2	2	2
GSM177934	2	2	2	2	2	2	2	2	2	2	2	2	2	2	2	2	2	2	2	2	3	2	2	2	2
GSM177935	5	5	5	5	5	5	5	5	5	5	3	5	5	5	5	5	5	3	5	5	3	5	5	4	5
GSM177936	1	1	1	1	1	1	1	1	1	1	1	1	1	1	1	1	1	1	1	1	4	1	1	1	1
GSM177937	5	5	5	5	5	5	5	5	5	5	3	5	5	5	3	5	5	3	3	5	3	5	5	4	5
GSM177938	1	4	4	4	1	1	1	1	4	1	1	1	1	1	1	1	3	1	1	4	1	1	1	1	1
GSM177939	INC	3	3	3	1	5	5	5	3	2	3	3	1	5	5	4	3	4	2	3	3	5	1	1	3
GSM177940	1	1	1	1	1	1	1	1	1	2	1	1	1	1	1	1	1	1	1	1	1	1	1	2	1
GSM177941	1	4	1	1	1	1	1	1	1	2	2	1	1	1	1	1	1	4	2	1	1	1	1	1	2
GSM177942	2	2	2	2	2	2	2	2	2	2	2	2	2	2	2	2	2	2	2	2	2	2	2	2	2
GSM177943	5	5	5	5	5	5	5	5	5	5	5	5	5	5	5	5	5	5	5	5	5	5	5	2	5
GSM177944	5	5	5	5	5	2	5	5	5	2	5	5	5	5	2	3	5	3	5	5	5	5	5	3	5
GSM177945	1	2	1	1	1	1	1	1	1	1	1	1	1	1	1	1	5	1	1	1	1	1	1	1	1
GSM177946	2	2	2	2	1	2	2	2	2	1	2	2	1	2	2	1	3	4	2	2	2	2	2	4	2
GSM177947	1	1	1	1	1	1	1	1	2	1	2	1	2	2	1	1	1	4	1	1	1	1	1	4	1
GSM177948	1	1	1	1	1	1	1	1	1	1	1	1	1	1	1	1	1	4	1	1	1	1	1	1	4
GSM177950	1	1	1	1	1	1	2	2	1	1	1	1	2	2	2	1	1	1	1	1	1	2	1	1	2
GSM177952	2	2	1	1	2	2	2	2	1	1	2	1	1	2	2	1	2	1	2	1	2	2	1	1	2
GSM177953	1	2	2	2	1	1	1	2	1	2	1	1	1	1	1	1	3	4	1	2	1	1	1	2	2
GSM177954	5	5	5	5	5	5	5	5	5	5	5	5	5	5	5	5	5	5	5	5	5	5	5	5	5
GSM177955	1	1	1	1	1	1	1	1	1	1	1	1	1	1	1	1	3	1	1	1	4	1	1	1	1
GSM177956	5	5	5	5	5	5	5	5	5	5	5	5	5	5	5	5	5	5	5	5	5	5	5	2	5
GSM177957	INC	4	4	4	1	1	1	1	1	2	1	1	1	4	1	1	3	4	4	4	4	1	1	4	4
GSM177958	2	2	2	2	2	2	2	2	2	2	2	2	2	2	2	1	3	4	2	2	2	2	2	2	2
GSM177959	INC	3	3	3	2	3	2	3	3	1	3	5	5	3	2	5	5	4	2	3	3	2	3	1	3
GSM177960	2	2	2	2	2	2	2	2	2	2	2	2	2	2	2	2	2	1	2	2	2	2	2	2	2
GSM177961	1	4	4	4	1	1	1	1	4	1	1	1	1	1	1	1	3	4	4	4	4	1	1	1	1
GSM177963	5	5	4	4	5	5	5	5	5	5	5	5	5	5	5	5	5	4	5	5	5	5	4	4	5
GSM177965	1	1	4	4	1	1	1	1	1	1	1	1	1	1	1	1	3	1	1	4	1	1	1	4	1
GSM177966	5	5	5	5	5	5	5	5	5	5	5	5	5	5	5	5	5	5	5	5	5	5	5	5	5
GSM177967	1	1	1	1	1	1	1	1	1	1	1	1	1	1	1	1	1	1	1	1	1	1	1	2	1
GSM177968	INC	5	5	5	4	4	5	5	3	1	2	2	1	4	1	5	5	1	2	5	2	5	2	4	4
GSM177969	1	4	4	4	1	1	1	1	1	1	1	1	1	1	1	1	3	4	4	4	4	1	1	1	1
GSM177970	5	5	5	5	5	5	5	5	5	5	5	5	5	5	5	5	5	5	5	5	5	5	5	4	5
GSM177971	1	2	2	2	1	1	1	1	1	2	1	1	1	1	1	1	3	4	2	2	1	1	1	2	2
GSM177972	4	4	4	4	1	1	4	4	4	1	4	4	1	1	1	4	3	4	4	4	4	4	1	4	1
GSM177973	2	2	2	2	2	2	2	2	2	2	2	2	2	2	2	2	2	1	2	2	2	2	2	2	2
GSM177974	1	2	4	4	1	1	1	1	1	1	1	1	1	1	1	1	2	1	1	4	1	1	1	1	1
GSM177975	5	5	5	5	5	5	5	5	5	5	5	5	5	5	5	5	5	5	5	5	5	5	5	5	5
GSM177976	1	4	4	4	1	1	1	1	1	1	1	1	1	1	1	1	3	4	2	4	4	1	1	4	1
GSM177977	3	3	3	3	3	3	2	3	3	2	3	3	2	2	3	3	3	3	2	3	3	2	3	3	3
GSM177978	5	5	5	5	5	5	5	5	5	2	5	5	5	5	2	5	5	3	5	5	5	5	5	3	5
GSM177979	5	5	5	5	5	5	5	5	5	5	3	5	5	5	2	5	5	3	2	5	3	5	3	1	5
GSM177980	5	5	5	5	5	5	5	5	5	2	5	5	5	2	5	5	5	5	5	5	5	5	5	5	5
GSM177981	INC	3	3	3	1	1	1	3	2	3	3	1	1	3	3	3	3	4	2	3	2	1	2	2	2
GSM177982	1	4	4	4	1	1	1	1	1	1	4	1	1	1	1	1	3	4	2	4	4	1	1	1	1
GSM177983	2	2	2	2	2	2	2	2	2	2	3	2	2	1	2	2	3	1	2	2	1	2	2	2	2
GSM177984	1	1	1	1	1	1	1	1	1	1	1	1	1	1	1	1	1	1	1	1	1	1	1	1	1
GSM177985	5	5	5	5	5	5	5	5	5	5	4	5	5	5	4	5	5	4	2	5	4	5	5	4	5
GSM177986	2	2	2	2	1	2	2	2	2	2	2	1	1	1	2	1	3	4	2	2	2	2	2	1	1
GSM177988	INC	2	5	5	5	5	2	5	5	2	4	5	3	2	2	5	5	3	4	5	4	2	5	2	5
GSM177989	1	4	4	4	1	1	1	1	1	1	4	1	1	1	1	1	3	4	1	4	4	1	1	4	1
GSM177990	1	1	2	2	1	1	1	1	2	1	1	1	1	1	1	1	1	1	2	2	2	1	2	1	2
GSM177991	4	4	4	4	1	4	4	4	4	1	4	4	4	1	1	4	4	4	4	4	4	4	1	4	1
GSM177992	1	1	4	4	1	1	1	1	1	1	1	1	1	1	1	1	3	1	1	4	1	1	1	1	1
GSM177993	5	4	4	4	5	4	5	5	5	4	4	5	5	5	5	5	5	4	5	4	4	5	4	4	5
GSM177995	1	1	4	4	1	1	1	1	2	2	2	1	1	1	1	1	3	1	2	4	1	1	1	2	2
GSM177996	1	4	4	4	1	1	1	1	1	1	4	1	1	1	1	1	4	4	4	4	4	1	1	1	1
GSM177997	INC	1	4	4	2	1	1	1	1	1	3	2	2	1	1	1	3	4	2	4	1	1	2	2	2
GSM177998	1	1	4	4	1	1	1	1	1	1	1	1	1	1	1	1	3	4	2	4	1	1	1	1	1
GSM177999	5	5	5	5	5	5	5	5	5	5	5	5	5	5	4	5	5	4	5	5	5	5	5	4	5
GSM178000	1	2	4	4	1	1	1	1	1	1	2	1	1	1	1	1	3	4	2	4	4	1	4	1	2
GSM178001	5	5	5	5	5	5	5	5	5	5	5	5	5	5	5	5	5	5	5	5	5	5	5	5	5
GSM178002	1	1	1	1	1	1	1	1	1	1	1	1	1	1	1	1	3	1	1	1	1	1	1	1	1
GSM178003	5	5	5	5	4	5	5	5	5	1	4	5	5	4	5	5	5	5	2	5	4	5	5	1	5
GSM178004	1	2	2	2	1	1	1	2	1	1	2	1	1	1	1	1	3	1	2	2	1	1	1	1	2
GSM178005	2	2	2	2	2	2	2	2	2	1	2	1	1	1	2	2	3	4	1	2	4	2	2	2	2
GSM178006	INC	3	3	3	5	3	5	3	3	2	3	5	5	4	5	5	3	5	2	3	3	5	5	4	3
GSM178007	1	1	4	4	2	1	1	2	1	2	1	2	2	1	1	1	3	4	2	4	1	1	1	1	1
GSM178008	1	2	2	2	1	1	1	1	2	2	1	1	1	1	1	1	3	2	2	2	1	1	1	1	2
GSM178009	5	3	5	5	5	5	5	5	5	5	3	5	5	4	3	4	5	3	3	5	3	5	4	2	5
GSM178010	3	3	3	3	3	3	2	3	3	3	3	3	3	2	3	3	3	4	3	3	3	2	3	3	3
GSM178011	5	5	5	5	5	5	5	5	5	5	5	5	5	5	5	5	5	4	5	5	5	5	5	5	5
GSM178012	5	5	5	5	5	5	5	5	5	5	5	5	5	5	5	5	5	5	5	5	5	5	5	5	5
GSM178013	5	5	5	5	5	5	5	5	5	5	5	5	5	5	5	5	5	5	5	5	5	5	5	5	5
GSM178014	INC	2	2	2	1	2	1	2	2	2	1	1	1	1	1	1	3	1	1	2	4	1	1	2	2
GSM178015	1	4	4	4	1	1	1	1	1	1	4	1	1	1	1	1	4	1	1	4	4	1	1	1	1
GSM178016	1	1	4	4	1	1	1	1	1	1	1	1	1	1	1	1	3	4	1	4	1	1	1	2	1
GSM178017	2	2	3	3	2	2	2	3	2	2	2	2	2	2	3	2	3	2	2	3	2	2	2	3	2
GSM178018	2	2	2	2	1	2	2	2	1	1	2	1	1	1	2	1	3	1	2	2	4	2	1	2	2
GSM178019	1	1	4	4	1	1	1	1	1	1	1	1	1	1	1	1	3	1	1	4	1	1	1	1	1
GSM178020	2	2	3	3	2	2	2	2	2	2	3	2	2	2	3	1	3	4	2	3	2	2	2	2	2
GSM178021	5	5	5	5	5	5	5	5	5	2	2	2	2	5	2	5	5	2	2	5	4	5	5	3	2
GSM178022	1	1	1	1	1	1	1	1	1	1	1	1	1	1	1	1	3	1	1	1	4	1	1	1	1
GSM178024	1	4	4	4	1	1	1	1	1	1	1	1	1	1	1	1	1	1	1	4	1	1	1	1	1
GSM178025	2	2	2	2	2	2	2	2	2	2	2	2	2	2	2	2	3	1	1	2	2	2	2	2	2
GSM178026	2	2	2	2	2	2	2	2	2	2	2	2	2	2	2	2	1	2	2	2	1	2	2	2	2
GSM178027	1	1	4	4	1	1	1	1	1	1	1	1	1	1	1	1	3	4	2	4	1	1	1	1	1
GSM178028	INC	5	3	3	1	3	5	3	2	4	3	3	5	5	3	3	3	3	2	3	3	5	1	4	4
GSM178029	INC	4	4	4	1	1	1	1	4	1	4	4	1	1	1	1	3	4	4	4	4	1	1	4	4
GSM178030	1	1	4	4	1	1	1	1	1	1	1	1	1	1	1	1	3	1	1	4	1	1	1	1	1
GSM178031	1	2	1	1	1	1	1	1	1	1	1	1	1	2	1	1	3	1	2	1	1	1	1	1	2
GSM178032	1	1	4	4	1	1	1	1	1	1	1	1	1	1	1	1	3	1	1	4	1	1	1	1	1
GSM178034	5	5	5	5	5	5	5	5	5	5	5	5	5	5	5	5	5	5	5	5	5	5	5	3	5
GSM178035	5	5	5	5	5	5	5	5	5	5	5	5	5	5	5	5	5	4	5	5	5	5	5	5	5
GSM178036	1	2	4	4	1	1	1	1	1	1	2	1	1	1	1	1	3	1	2	4	1	1	1	1	1
GSM178037	1	1	1	1	1	1	1	1	1	1	1	1	1	1	1	1	3	2	2	1	1	1	1	1	2
GSM178038	2	2	2	2	2	2	2	2	2	2	2	2	2	2	2	2	2	2	2	2	2	2	2	1	2
GSM178039	1	4	4	4	1	1	1	1	1	1	4	1	1	1	1	1	3	4	4	4	4	1	1	1	1
GSM178040	1	1	1	1	1	1	1	1	1	1	1	1	1	1	1	1	3	1	2	1	1	1	1	1	1
GSM178041	1	1	4	4	1	1	1	1	1	1	1	1	1	1	1	1	3	4	2	4	1	1	1	1	1
GSM178042	1	1	1	1	1	1	1	1	1	1	1	1	1	1	1	1	3	1	1	1	1	1	1	1	2
GSM178043	1	4	4	4	1	1	1	1	1	1	4	1	1	1	1	1	1	4	4	4	4	1	1	4	1
GSM178044	1	4	4	4	1	1	1	1	1	1	1	1	1	1	1	1	3	4	4	4	4	1	1	1	1
GSM178045	1	1	4	4	1	1	1	1	1	1	1	1	1	1	1	1	3	4	1	4	4	1	1	1	1
GSM178046	INC	2	2	2	1	2	2	2	2	1	1	1	1	2	1	1	3	4	2	2	1	2	1	1	2
GSM178047	1	1	4	4	1	1	1	1	1	1	1	1	1	1	1	1	3	1	1	4	1	1	1	1	1
GSM178049	1	1	1	1	1	1	1	1	1	1	4	1	1	1	1	1	3	1	1	1	1	1	1	1	1
GSM178050	2	2	2	2	2	2	2	2	2	2	2	2	2	2	2	2	3	2	2	2	2	2	2	5	2
GSM178051	1	4	4	4	1	1	1	1	4	1	1	4	1	1	1	1	4	4	4	4	4	1	1	4	1
GSM178052	2	2	3	3	2	2	2	3	3	2	3	3	2	2	2	3	2	3	2	3	3	2	2	2	3
GSM178053	INC	2	4	4	1	1	2	2	1	1	2	2	1	1	2	1	3	1	1	4	2	2	1	2	2
GSM178054	1	1	4	4	1	1	1	1	1	1	4	1	1	1	1	1	4	4	1	4	4	1	1	4	1
GSM178055	5	5	5	5	5	5	5	5	5	2	3	5	5	5	2	5	5	4	5	5	3	5	5	2	5
GSM178056	2	2	2	2	1	1	1	1	2	2	2	2	1	2	1	1	2	2	2	2	2	1	1	1	2
GSM178057	2	2	2	2	2	2	2	2	2	2	2	2	2	2	2	2	2	2	1	2	1	2	2	2	2
GSM178058	2	2	3	3	2	2	2	2	2	2	2	2	2	2	2	2	3	3	2	3	2	2	2	2	2
GSM178059	5	5	5	5	5	5	5	5	5	2	5	5	5	5	5	5	5	4	5	5	5	5	5	4	5
GSM178060	2	2	2	2	2	2	2	2	2	2	2	2	2	2	2	2	2	2	2	2	2	2	2	2	2
GSM178061	1	1	1	1	1	1	1	1	1	2	1	1	1	4	1	1	3	4	2	1	4	1	1	1	1
GSM178062	1	4	4	4	1	1	1	1	1	1	1	1	1	1	1	1	3	4	2	4	1	1	1	1	1
GSM178063	3	3	3	3	2	3	5	3	3	3	3	3	2	5	2	3	5	3	2	3	3	5	3	4	3
GSM178064	1	2	2	2	1	1	1	2	2	2	1	1	1	1	1	1	5	1	1	2	1	1	2	2	2
GSM178065	3	3	3	3	2	3	2	3	3	2	3	3	2	3	3	3	3	4	2	3	3	2	3	2	3
GSM178066	INC	3	3	3	2	2	2	3	3	2	3	3	1	2	2	2	3	3	2	3	1	2	3	1	3
GSM178068	2	2	2	2	2	2	2	2	2	2	2	2	2	2	2	2	2	2	2	2	2	2	2	2	2
GSM178069	2	2	2	2	2	2	2	2	2	2	2	2	2	2	2	2	2	2	2	2	1	2	2	2	2
GSM178070	1	1	1	1	1	1	1	1	2	1	1	1	1	2	1	1	1	1	1	1	1	1	1	2	2
GSM178071	1	1	1	1	1	1	1	1	2	1	1	1	1	1	1	1	3	4	4	1	4	1	1	1	1
GSM178072	1	1	4	4	1	1	1	1	1	2	1	1	1	4	1	1	3	4	4	4	4	1	1	1	1
GSM178073	3	3	3	3	3	2	2	3	2	3	3	3	2	3	2	3	3	4	2	3	3	2	3	3	3
GSM178074	INC	2	2	2	1	1	1	2	2	1	1	2	1	1	2	1	3	1	2	2	1	1	2	2	2
GSM178075	5	5	5	5	5	5	5	5	5	5	5	5	5	5	4	5	5	5	5	5	5	5	5	5	5
GSM178076	1	1	4	4	1	1	1	1	1	1	1	1	1	1	1	1	1	4	1	4	1	1	1	2	1
GSM178077	1	2	4	4	1	1	1	1	1	2	1	1	1	1	1	1	3	4	2	4	4	1	1	4	4
GSM178078	5	5	5	5	5	5	5	5	5	5	5	5	5	5	5	5	5	5	5	5	5	5	5	5	5
GSM178079	5	5	5	5	5	5	5	5	5	5	5	5	5	5	5	5	5	5	5	5	5	5	5	5	5
GSM178080	2	2	2	2	2	2	2	2	2	2	2	2	2	2	2	2	2	2	2	2	2	2	2	2	2
GSM178081	INC	4	4	4	1	1	4	4	1	1	4	1	1	1	1	4	1	4	2	4	4	4	1	4	1
GSM178082	5	5	5	5	5	5	5	5	5	5	4	5	5	5	5	5	5	4	5	5	4	5	5	1	5
GSM26804	2	2	2	2	2	2	2	2	2	2	2	2	2	2	2	2	2	2	2	2	2	2	2	2	2
GSM26867	2	2	2	2	2	2	2	2	2	2	2	2	2	2	2	2	2	2	2	2	2	2	2	2	2
GSM26868	2	2	2	2	2	2	2	2	2	2	2	2	2	2	2	2	2	2	1	2	2	2	2	2	2
GSM26869	1	1	1	1	1	1	1	1	1	1	1	1	1	1	1	1	1	1	1	1	1	1	1	1	1
GSM26871	5	5	5	5	5	5	5	5	5	5	5	5	5	5	5	5	5	5	5	5	5	5	5	4	5
GSM26872	2	1	2	2	2	2	2	2	2	1	1	2	1	2	2	2	2	2	2	2	2	2	1	2	1
GSM26873	1	1	4	4	1	1	1	1	1	1	1	1	1	1	1	1	2	1	1	4	1	1	1	1	1
GSM26874	INC	1	1	1	2	2	2	2	2	1	1	2	2	2	2	2	1	1	1	1	1	2	1	2	1
GSM26875	2	2	2	2	2	2	2	2	2	2	2	2	2	2	2	2	2	2	2	2	2	2	2	2	2
GSM26876	2	2	2	2	2	2	2	2	2	2	2	2	1	2	2	2	2	1	1	2	4	2	2	2	1
GSM26877	1	2	2	2	1	1	1	1	1	1	1	2	1	2	1	1	2	1	2	2	2	1	1	2	2
GSM26878	3	3	3	3	2	3	2	3	5	2	3	3	3	2	2	3	2	3	2	3	3	2	3	2	3
GSM26879	2	2	2	2	2	2	2	2	2	2	2	2	2	2	2	2	2	2	2	2	1	2	2	2	2
GSM26880	5	5	5	5	5	5	5	5	5	5	5	5	5	5	5	5	3	4	5	5	3	5	4	4	3
GSM26881	2	2	2	2	2	2	2	2	2	2	2	2	2	2	2	2	2	2	2	2	4	2	2	2	2
GSM26882	5	5	5	5	5	5	5	5	5	2	5	5	5	5	5	5	1	5	5	5	5	5	5	1	5
GSM26883	3	3	3	3	2	3	2	3	3	2	3	3	3	3	3	3	2	3	3	3	3	2	3	2	3
GSM26884	5	5	5	5	5	5	5	5	5	5	5	5	5	5	5	5	1	5	5	5	5	5	5	1	5
GSM26885	1	1	1	1	1	1	1	1	1	1	1	1	1	1	1	1	2	4	1	1	2	1	1	1	1
GSM26887	2	3	3	3	2	2	2	3	3	3	2	2	2	2	2	2	3	2	2	3	2	2	2	5	2
GSM26888	5	5	5	5	5	5	5	5	5	2	5	5	5	5	5	5	5	5	5	5	5	5	5	1	5
GSM26889	5	5	5	5	5	5	5	5	5	5	5	5	5	5	5	5	5	5	5	5	5	5	5	4	5
GSM26890	2	2	2	2	2	2	2	2	2	2	2	2	2	2	2	2	2	2	2	2	1	2	2	1	2
GSM26891	2	2	2	2	2	2	2	2	2	2	2	2	2	2	2	2	2	2	2	2	2	2	2	2	2
GSM26892	5	5	5	5	5	5	5	5	5	2	2	2	5	2	2	5	1	2	2	5	2	5	5	2	2
GSM26893	5	5	5	5	5	5	5	5	5	5	5	5	5	5	5	5	5	5	5	5	5	5	5	1	5
GSM26894	2	2	2	2	2	2	2	2	2	2	1	2	1	2	2	2	2	2	2	2	1	2	2	2	2
GSM26895	5	5	5	5	5	5	5	5	5	5	5	5	5	5	5	5	1	5	5	5	5	5	5	1	5
GSM26896	INC	4	4	4	1	4	1	1	1	1	4	1	1	2	1	1	2	1	2	4	2	1	2	2	1
GSM26897	2	2	2	2	2	2	2	2	2	2	1	2	1	2	2	1	2	2	2	2	1	2	2	1	2
GSM26898	5	5	5	5	5	5	5	5	5	5	5	5	5	5	5	5	1	5	5	5	5	5	5	1	5
GSM26900	INC	3	3	3	5	3	5	5	3	1	3	3	5	5	3	4	5	4	2	3	3	5	5	2	3
GSM26901	2	2	2	2	2	2	2	2	2	2	2	2	2	2	2	2	2	2	2	2	2	2	2	2	2
GSM26902	5	5	5	5	5	5	5	5	5	5	5	5	5	5	5	5	1	5	5	5	5	5	5	1	5
GSM26903	3	3	3	3	3	3	3	3	5	2	3	3	3	3	3	3	3	3	1	3	3	3	3	3	1
GSM26904	2	2	2	2	2	2	2	2	2	2	2	2	2	2	2	2	2	2	2	2	2	2	2	2	2
GSM26905	5	5	5	5	5	5	5	5	5	2	5	5	5	5	5	5	1	5	5	5	5	5	5	2	5
GSM26906	5	5	5	5	5	5	5	5	5	5	5	5	5	5	5	5	5	3	5	5	5	5	5	4	5
GSM26907	2	2	2	2	2	2	2	2	2	2	2	2	2	2	2	2	2	1	2	2	1	2	2	1	2
GSM26908	5	5	5	5	5	5	5	5	5	2	3	5	5	5	5	5	5	3	2	5	3	5	5	4	5
GSM26909	1	1	1	1	2	2	1	2	1	2	1	1	1	2	2	1	2	1	2	1	2	1	1	1	2
GSM26910	INC	3	3	3	2	5	5	4	3	2	3	3	5	4	1	3	3	4	2	3	3	5	4	2	3
GSM26911	2	2	2	2	2	2	2	2	2	2	2	2	2	2	2	2	2	2	2	2	2	2	2	2	2
GSM26912	5	5	5	5	5	5	5	5	5	5	4	2	2	5	5	5	5	1	2	5	2	5	5	4	4
GSM26913	1	1	1	1	1	1	1	1	1	1	1	1	1	1	1	1	1	1	1	1	1	1	1	1	1
GSM26914	2	2	2	2	2	2	2	2	2	2	2	2	2	2	2	2	2	2	2	2	2	2	2	2	2
GSM282373	3	3	3	3	2	3	2	3	3	2	3	3	3	2	2	3	2	3	3	3	3	2	3	2	3
GSM282374	2	1	2	2	2	2	2	2	2	2	2	2	2	2	2	2	1	1	1	2	1	2	1	1	2
GSM282375	1	4	4	4	1	1	1	1	4	1	4	1	1	1	1	1	3	4	1	4	4	1	1	1	1
GSM282376	1	1	1	1	1	1	1	1	1	1	1	1	1	1	1	1	2	1	1	1	2	1	1	1	1
GSM282377	2	2	2	2	2	2	2	2	2	2	2	2	2	2	2	2	2	2	2	2	2	2	2	2	2
GSM282378	1	2	1	1	1	1	1	1	1	1	2	1	1	1	1	1	3	1	1	1	4	1	1	1	1
GSM282379	2	2	2	2	2	2	2	2	2	2	2	2	2	2	2	2	2	2	2	2	1	2	2	2	2
GSM282380	1	2	4	4	1	1	1	2	1	1	1	1	1	2	1	1	2	1	2	4	2	1	1	3	2
GSM282381	1	1	1	1	1	1	1	1	1	1	1	1	1	1	1	1	1	1	1	1	1	1	1	1	1
GSM282382	1	1	1	1	1	1	1	1	1	1	1	1	1	1	1	1	1	1	1	1	1	1	1	1	1
GSM282383	1	1	4	4	1	1	1	1	1	1	1	1	1	1	1	1	3	4	1	4	4	1	1	1	1
GSM282384	1	1	1	1	1	1	1	1	1	2	1	1	1	1	1	1	1	1	1	1	1	1	1	1	1
GSM282385	5	5	5	5	5	5	5	5	5	5	5	5	5	5	5	5	5	5	5	5	5	5	5	4	5
GSM282386	2	1	2	2	2	2	2	2	1	1	2	2	2	2	2	2	1	1	1	2	1	2	2	2	2
GSM282387	1	1	4	4	1	1	1	1	1	1	2	1	1	1	1	1	3	4	1	4	4	1	1	1	1
GSM282388	1	1	1	1	1	1	1	1	1	1	1	1	1	1	1	1	1	4	1	1	1	1	1	1	1
GSM282389	1	1	1	1	1	1	1	1	2	2	1	1	1	1	1	1	1	1	1	1	1	1	1	2	2
GSM282390	1	1	1	1	1	1	1	1	1	1	1	1	1	1	1	1	1	1	1	1	1	1	1	1	1
GSM282391	1	1	1	1	1	1	1	1	1	1	4	1	1	1	1	1	2	4	1	1	2	1	1	4	1
GSM282392	2	2	2	2	2	2	2	2	2	2	2	2	2	2	2	2	2	2	2	2	2	2	2	2	2
GSM282393	INC	4	4	4	1	1	1	1	4	1	4	4	1	1	1	1	4	4	4	4	4	1	1	4	1
GSM282394	2	2	2	2	2	2	2	2	1	2	2	2	1	2	2	2	2	1	2	2	2	2	2	2	2
GSM282395	1	1	1	1	1	1	1	1	1	1	1	1	1	1	1	1	1	1	1	1	1	1	1	1	1
GSM282396	2	2	3	3	2	2	2	2	3	2	3	2	2	2	2	2	3	2	2	3	2	2	2	2	2
GSM282397	1	2	2	2	1	1	1	1	1	1	1	1	1	2	1	1	2	1	2	2	2	1	1	1	2
GSM282399	2	2	2	2	2	2	2	2	2	2	2	2	1	2	2	1	2	2	1	2	2	2	2	2	2
GSM282400	1	2	4	4	1	1	1	1	1	1	2	1	1	1	1	1	1	1	1	4	1	1	1	4	1
GSM282401	4	4	4	4	1	4	4	4	4	1	4	4	4	4	1	4	4	4	4	4	4	4	1	4	1
GSM282402	1	1	1	1	1	1	1	1	1	1	1	1	1	1	1	1	1	1	1	1	1	1	1	1	1
GSM282403	2	2	2	2	2	2	2	2	2	2	2	2	2	2	2	2	2	2	2	2	2	2	2	2	2
GSM282404	1	1	1	1	1	1	1	1	1	1	4	1	1	1	1	1	2	1	1	1	1	1	1	1	1
GSM282405	1	2	2	2	1	1	1	1	1	1	1	2	1	1	1	1	2	2	1	2	1	1	1	1	2
GSM282406	1	1	1	1	1	1	1	1	1	1	1	1	1	2	1	1	2	1	1	1	2	1	1	4	1
GSM282407	1	1	1	1	1	1	1	1	1	1	1	1	1	1	1	1	1	1	1	1	1	1	1	1	1
GSM282408	1	1	1	1	1	1	1	1	1	1	2	1	1	1	1	1	1	1	1	1	1	1	1	1	1
GSM282410	2	2	3	3	2	2	2	2	3	2	1	3	2	2	2	3	2	3	2	3	3	2	3	2	3
GSM282411	1	1	1	1	1	1	1	1	1	1	1	1	1	1	1	1	1	1	1	1	1	1	1	1	1
GSM282412	1	1	1	1	1	1	1	1	1	1	1	1	1	1	1	1	1	4	1	1	1	1	1	1	1
GSM282413	5	5	5	5	5	5	5	5	5	5	5	5	5	5	5	5	5	4	5	5	5	5	5	5	5
GSM282414	1	1	1	1	1	1	1	1	1	2	1	1	1	2	1	1	1	1	1	1	1	1	1	1	2
GSM282415	1	2	2	2	1	1	1	2	1	2	1	1	1	1	1	1	2	2	2	2	2	1	1	1	2
GSM282416	1	1	1	1	1	1	1	1	1	2	1	1	1	1	1	1	1	1	1	1	1	1	1	1	1
GSM282417	1	1	1	1	1	1	1	1	1	1	1	1	1	1	1	1	2	1	1	1	2	1	1	1	2
GSM282420	4	4	4	4	1	1	1	4	4	1	4	4	4	1	1	4	4	4	4	4	4	1	1	4	1
GSM282421	1	1	1	1	1	1	1	1	1	1	1	1	1	1	1	1	1	1	1	1	1	1	1	1	1
GSM282422	1	1	1	1	1	1	1	1	1	1	1	1	1	1	1	1	3	1	1	1	1	1	1	1	1
GSM282423	1	1	1	1	1	1	1	1	1	1	1	1	1	1	1	1	1	4	1	1	1	1	1	1	1
GSM282424	1	1	1	1	1	1	1	1	1	1	2	2	2	2	1	2	2	2	1	1	1	1	1	1	2
GSM282425	1	1	1	1	1	1	1	1	1	1	1	1	1	1	1	1	1	1	1	1	1	1	1	1	1
GSM282426	1	2	1	1	1	1	1	1	1	1	1	1	1	1	1	1	2	1	1	1	1	1	1	1	2
GSM282427	5	5	5	5	5	5	5	5	5	2	4	1	5	5	5	5	5	1	2	5	1	5	2	4	4
GSM282428	2	2	2	2	2	2	2	2	2	2	2	2	2	2	2	2	2	2	2	2	1	2	2	2	2
GSM282430	1	2	2	2	1	1	1	1	2	1	1	1	1	1	1	1	2	2	2	2	1	1	1	2	2
GSM282431	1	1	1	1	1	1	1	1	1	1	1	1	1	1	1	1	1	1	1	1	1	1	1	1	1
GSM282432	1	1	1	1	1	1	1	1	1	1	1	1	1	1	1	1	1	1	1	1	1	1	1	1	1
GSM282433	1	1	1	1	1	1	1	1	1	1	1	1	1	1	1	1	3	4	1	1	4	1	1	1	1
GSM282434	1	4	4	4	1	1	1	1	4	1	4	1	1	1	1	1	3	4	4	4	4	1	1	4	1
GSM282435	5	5	5	5	5	5	5	5	5	5	4	2	5	5	5	5	5	1	2	5	4	5	5	5	4
GSM282436	1	4	1	1	1	1	1	1	1	1	1	2	2	1	1	1	2	4	1	1	1	1	2	1	1
GSM282437	1	1	1	1	1	1	1	1	1	1	1	1	1	1	1	1	2	1	1	1	1	1	1	2	2
GSM282438	1	1	1	1	1	1	1	1	1	1	1	1	1	1	1	1	1	1	1	1	1	1	1	1	1
GSM282439	1	1	1	1	1	1	1	1	1	1	1	1	1	1	1	1	1	1	1	1	1	1	1	1	1
GSM282440	5	5	5	5	5	5	5	5	5	5	5	5	5	5	5	5	5	5	5	5	5	5	5	5	5
GSM282441	1	1	1	1	1	1	1	1	1	2	1	1	1	1	1	1	2	1	1	1	1	1	1	1	2
GSM282442	1	1	1	1	1	1	1	1	1	1	1	1	1	1	1	1	1	1	1	1	1	1	1	1	1
GSM282443	1	1	1	1	1	1	1	1	1	1	1	1	1	1	1	1	1	1	1	1	1	1	1	1	1
GSM282444	1	1	1	1	1	1	1	1	1	1	1	1	1	2	1	1	1	1	1	1	1	1	1	1	1
GSM282445	1	1	1	1	1	1	1	1	1	1	1	1	1	1	1	1	1	4	1	1	1	1	1	4	1
GSM282446	5	5	5	5	5	5	5	5	5	2	4	5	5	4	4	5	5	4	2	5	4	5	5	4	5
GSM282447	1	4	1	1	1	1	1	1	1	1	4	1	1	1	1	1	3	4	4	1	4	1	1	4	1
GSM282448	1	4	4	4	1	1	1	4	1	1	4	1	1	4	4	1	1	3	2	4	1	1	1	1	1
GSM282449	1	1	1	1	1	1	1	1	1	1	1	1	1	1	1	1	1	1	1	1	1	1	1	1	1
GSM282450	2	2	2	2	2	2	2	2	2	2	2	2	2	2	2	2	2	2	2	2	2	2	2	2	2
GSM282451	1	1	1	1	1	1	1	1	1	1	1	1	1	1	1	1	1	1	1	1	1	1	1	1	1
GSM282452	1	1	1	1	1	1	1	1	1	1	1	1	1	1	1	1	1	1	1	1	1	1	1	1	1
GSM282453	INC	4	4	4	1	4	4	4	1	1	1	1	1	1	1	1	2	4	2	4	1	4	1	4	1
GSM282454	5	5	5	5	5	5	5	5	5	5	5	5	5	5	5	5	5	5	5	5	5	5	5	5	5
GSM282455	1	1	1	1	1	1	1	1	1	1	1	2	1	2	1	1	1	1	1	1	1	1	1	1	1
GSM282456	1	1	1	1	1	1	1	1	1	1	1	1	1	1	1	1	1	4	1	1	1	1	1	1	1
GSM282457	INC	3	3	3	1	5	5	5	5	2	1	3	1	2	4	3	3	3	2	3	3	5	4	1	3
GSM282458	1	1	1	1	1	1	1	1	1	1	1	1	1	1	1	1	1	1	1	1	1	1	1	1	1
GSM282459	INC	4	4	4	1	1	1	1	1	1	4	4	1	1	1	4	4	4	4	4	4	1	1	4	1
GSM282461	1	1	3	3	1	1	1	1	1	1	1	1	1	1	2	1	2	1	2	3	1	1	1	1	1
GSM282462	1	1	1	1	1	1	1	1	1	2	1	1	1	1	1	1	2	1	1	1	1	1	1	4	1
GSM282463	1	1	1	1	1	1	1	1	1	1	1	1	1	1	1	1	1	1	1	1	1	1	1	1	1
GSM282464	5	5	5	5	5	5	5	5	5	5	5	5	5	5	4	5	5	5	5	5	5	5	5	4	5
GSM282465	5	5	5	5	5	5	5	5	5	5	5	5	5	5	5	5	5	4	5	5	5	5	5	4	5
GSM282466	1	1	1	1	1	1	1	1	1	1	1	1	1	1	1	1	1	1	1	1	1	1	1	1	1
GSM282467	1	4	4	4	1	4	4	4	1	1	1	1	1	1	1	1	1	1	1	4	1	4	1	1	1
GSM282468	1	2	3	3	1	1	1	1	1	1	2	2	1	1	1	1	1	1	1	3	1	1	2	1	1
GSM282469	1	4	4	4	1	1	1	1	4	1	4	1	1	1	1	1	3	1	1	4	1	1	1	1	1
GSM282470	4	4	4	4	1	4	4	4	4	1	4	1	1	4	1	4	3	4	4	4	4	4	4	4	4
GSM282471	5	5	5	5	5	5	5	5	5	5	5	5	5	5	5	5	5	5	5	5	5	5	5	5	5
GSM282472	2	2	2	2	2	2	2	2	2	2	2	2	2	2	2	2	2	1	2	2	2	2	2	2	2
GSM282473	2	2	2	2	2	2	2	2	1	2	2	2	1	2	2	2	2	2	2	2	2	2	2	1	2
GSM282474	5	5	5	5	5	5	5	5	5	2	2	2	2	5	2	5	5	1	2	5	2	5	5	4	4
GSM282475	2	2	2	2	1	2	2	2	2	2	1	2	1	2	2	2	2	1	2	2	2	2	2	1	2
GSM282476	2	2	2	2	1	2	2	2	2	2	2	2	1	2	2	1	2	1	2	2	2	2	1	2	2
GSM282477	3	3	3	3	2	3	2	3	3	2	3	3	1	2	3	3	3	3	2	3	3	2	3	2	3
GSM282478	INC	5	5	5	5	5	5	5	5	2	4	2	1	4	1	4	3	4	2	5	2	5	4	4	4
GSM282479	1	1	1	1	1	1	1	1	1	2	1	1	1	2	1	1	1	1	1	1	1	1	1	1	2
GSM282480	2	2	2	2	2	2	2	2	2	1	2	2	2	2	2	2	2	2	1	2	2	2	2	2	2
GSM282481	1	1	2	2	1	1	1	1	1	1	1	1	1	2	1	1	2	2	1	2	1	1	1	2	2
GSM282482	5	5	5	5	5	5	5	5	5	4	4	5	5	4	5	5	5	4	2	5	4	5	5	1	5
GSM282483	2	2	2	2	2	2	2	2	2	2	1	2	2	2	2	2	2	2	2	2	1	2	1	2	2
GSM282484	2	2	2	2	2	2	2	2	2	2	2	2	2	2	2	2	2	1	2	2	1	2	2	2	2
GSM282485	1	1	1	1	1	1	1	1	1	2	1	1	1	1	1	1	1	1	1	1	1	1	1	1	1
GSM282486	1	1	1	1	1	1	1	1	1	1	1	1	1	1	1	1	2	4	1	1	2	1	1	1	1
GSM282487	1	2	1	1	1	1	1	1	1	1	1	2	1	1	1	1	2	1	1	1	2	1	1	1	1
GSM282488	2	2	2	2	2	2	2	2	2	1	2	2	2	1	2	2	2	1	1	2	1	2	2	1	2
GSM282489	3	3	3	3	2	3	3	3	3	2	1	3	2	3	3	2	3	3	2	3	3	3	3	1	3
GSM282490	1	2	4	4	1	1	1	1	1	1	1	1	1	1	1	1	3	1	1	4	1	1	1	1	1
GSM282491	2	2	2	2	2	2	2	2	2	2	2	1	2	2	2	2	2	1	2	2	1	2	2	2	2
GSM282492	1	1	1	1	1	1	1	1	1	1	1	1	1	1	1	1	1	1	1	1	1	1	1	1	1
GSM282493	INC	3	3	3	1	3	5	3	5	5	3	4	5	5	5	2	3	4	2	3	3	5	3	3	3
GSM282494	1	1	4	4	1	1	1	1	1	1	4	1	1	1	1	1	1	1	1	4	1	1	1	4	1
GSM282495	2	2	2	2	2	2	2	2	2	2	2	2	2	2	2	2	2	1	1	2	1	2	2	1	1
GSM282496	1	1	1	1	1	1	1	1	1	1	1	1	1	1	1	1	1	1	1	1	1	1	1	1	1
GSM282497	5	5	5	5	5	5	5	5	5	5	2	2	5	5	5	5	5	1	3	5	2	5	5	5	2
GSM282498	1	1	1	1	1	1	1	1	1	1	1	1	1	1	1	1	1	1	1	1	1	1	1	1	1
GSM282499	1	1	1	1	1	1	1	1	1	2	1	1	1	1	1	1	1	1	1	1	1	1	1	2	1
GSM282500	1	1	4	4	1	1	1	1	4	1	1	1	1	1	1	1	2	4	2	4	1	1	1	4	1
GSM282501	1	4	4	4	1	1	1	1	1	1	2	1	1	1	1	1	1	1	1	4	1	1	1	1	1
GSM282502	INC	3	3	3	2	5	5	5	2	2	3	3	2	2	2	3	2	3	2	3	5	5	2	1	3
GSM282503	1	1	4	4	1	1	1	1	4	1	1	1	1	1	1	1	3	1	1	4	1	1	1	1	1
GSM282504	1	1	1	1	1	1	1	1	1	1	1	1	1	1	1	1	2	1	1	1	1	1	1	1	1
GSM282506	1	2	1	1	1	1	1	1	1	1	2	1	1	1	1	1	2	1	2	1	1	1	2	1	1
GSM282507	2	2	2	2	2	2	2	2	2	2	1	2	2	2	2	2	2	2	2	2	2	2	2	2	2
GSM282508	5	5	5	5	5	5	5	5	5	5	5	5	5	5	5	5	5	5	5	5	5	5	5	3	5
GSM282509	1	1	1	1	1	1	1	1	1	1	1	1	1	1	1	1	1	1	2	1	1	1	1	1	1
GSM282510	2	2	2	2	2	2	2	2	1	2	2	2	2	2	2	2	2	1	2	2	1	2	2	1	1
GSM282511	5	5	5	5	5	5	5	5	5	2	2	2	2	5	5	5	5	1	2	5	2	5	5	5	4
GSM282512	1	4	4	4	1	1	1	1	1	1	1	1	1	1	1	1	2	4	1	1	1	1	1	4	1
GSM282513	INC	2	2	2	1	1	1	2	2	2	2	1	1	1	1	1	2	1	2	2	2	1	1	1	2
GSM282514	1	4	4	4	1	1	1	1	1	1	1	1	1	1	1	1	1	1	1	4	1	1	1	1	1
GSM282515	1	1	1	1	1	1	1	1	1	2	1	1	1	2	1	1	2	2	1	1	1	1	1	1	2
GSM282516	1	1	2	2	1	1	1	1	2	1	1	1	1	1	1	1	3	1	1	2	1	1	1	1	2
GSM282517	1	1	1	1	1	1	1	1	1	1	4	1	1	1	1	1	1	4	1	1	4	1	1	1	1
GSM282519	2	2	2	2	1	1	2	2	2	2	1	1	1	2	2	1	2	1	1	2	1	2	2	1	2
GSM282520	2	2	2	2	2	2	2	2	1	1	2	2	2	2	2	2	2	2	1	2	1	2	2	2	2
GSM282521	1	4	4	4	1	1	1	1	1	1	4	1	1	1	1	1	4	1	4	4	4	1	1	4	1
GSM282522	1	2	2	2	1	1	1	1	1	1	2	1	1	1	1	1	2	1	1	2	2	1	1	1	1
GSM282523	1	1	1	1	1	1	1	1	1	1	2	1	1	1	2	2	3	4	4	1	4	1	1	1	1
GSM282524	1	2	1	1	1	1	1	1	1	1	1	1	1	1	1	1	2	1	1	1	2	1	1	1	1
GSM282525	2	2	2	2	2	2	2	2	2	2	2	2	2	2	2	2	2	2	2	2	2	2	2	3	2
GSM282526	INC	2	4	4	1	1	2	2	2	1	1	1	1	2	2	1	1	2	2	4	1	2	2	2	2
GSM282527	1	2	2	2	1	1	1	2	1	1	2	2	1	1	2	1	2	1	1	2	1	1	2	2	1
GSM282528	5	5	5	5	5	5	5	5	5	5	5	5	5	5	5	5	5	5	5	5	5	5	5	5	5
GSM282529	1	1	1	1	1	1	1	1	1	1	1	1	1	1	1	1	1	1	1	1	1	1	1	1	1
GSM282530	1	1	1	1	1	1	1	1	1	1	1	1	1	1	1	1	2	1	1	1	2	1	1	1	2
GSM282531	1	1	1	1	1	1	1	1	1	1	1	1	1	1	1	1	2	4	1	1	1	1	1	1	1
GSM282532	1	1	1	1	1	1	1	1	1	1	1	1	1	1	1	1	2	4	1	1	2	1	1	1	1
GSM282533	1	1	1	1	1	1	1	1	1	1	1	1	1	1	1	1	1	1	1	1	1	1	1	1	1
GSM282534	1	1	1	1	1	1	1	1	1	1	1	1	1	1	1	1	1	4	1	1	1	1	1	4	1
GSM282536	1	1	1	1	1	1	1	1	1	1	1	1	1	1	1	1	1	1	1	1	1	1	1	1	1
GSM282537	2	2	2	2	2	2	2	2	2	2	2	2	2	2	2	1	2	2	1	2	1	2	2	1	2
GSM282538	2	2	2	2	2	2	2	2	2	2	2	2	2	2	2	2	2	2	2	2	2	2	2	2	2
GSM282539	2	2	2	2	2	2	2	2	2	2	2	2	2	2	2	2	2	2	2	2	2	2	2	1	2
GSM282540	1	1	4	4	1	1	1	1	1	1	4	1	1	1	1	1	4	4	4	4	4	1	1	4	1
GSM282541	1	1	1	1	1	1	1	1	1	1	1	1	1	1	1	1	1	1	1	1	1	1	1	1	1
GSM282542	1	1	1	1	1	1	1	1	1	1	1	1	1	1	1	1	1	1	1	1	1	1	1	2	1
GSM282543	2	2	2	2	1	2	2	2	2	1	2	1	1	2	2	2	2	1	1	2	1	2	2	2	2
GSM282545	2	2	2	2	2	2	2	2	2	2	2	2	2	2	2	2	2	2	2	2	1	2	2	2	2
GSM282546	1	1	1	1	1	1	1	1	1	2	1	1	1	1	1	1	1	1	1	1	1	1	1	1	1
GSM282547	1	4	4	4	1	1	1	1	1	1	4	1	1	1	1	1	4	4	1	4	4	1	1	1	1
GSM282548	1	1	1	1	1	1	1	1	1	1	1	1	1	1	1	1	2	1	1	1	1	1	1	1	1
GSM282549	1	1	1	1	1	1	1	1	1	1	1	1	1	1	1	1	2	1	1	1	1	1	1	1	1
GSM282550	1	1	1	1	1	1	1	1	1	1	1	1	1	1	1	1	1	4	1	4	1	1	1	1	1
GSM282551	5	5	5	5	5	5	5	5	5	5	5	5	5	4	5	5	1	5	5	5	5	5	5	4	5
GSM282552	2	2	2	2	1	2	2	2	2	2	2	2	2	2	2	1	2	2	1	2	1	2	1	1	2
GSM282553	2	2	2	2	1	1	2	2	2	2	2	2	1	2	2	1	2	1	1	2	2	2	2	1	1
GSM282556	2	2	2	2	2	2	2	2	2	2	2	2	2	2	2	2	2	2	2	2	2	2	2	2	2
GSM282557	1	1	1	1	1	1	1	1	1	2	1	2	1	2	1	1	2	2	1	1	1	1	1	1	2
GSM282558	INC	2	4	4	1	2	1	1	1	2	2	2	2	2	1	2	2	1	1	4	1	1	2	2	1
GSM282559	1	4	4	4	1	1	1	1	1	1	4	4	1	1	1	1	4	4	4	4	4	1	1	4	1
GSM282560	1	1	1	1	1	1	1	1	1	1	1	1	1	1	1	1	1	1	1	1	1	1	1	4	1
GSM282561	2	2	2	2	2	2	2	2	2	2	2	2	2	2	2	2	2	2	2	2	2	2	2	2	2
GSM282562	1	1	1	1	1	1	1	1	1	1	1	1	1	1	1	1	1	1	1	1	1	1	1	1	1
GSM282563	1	4	4	4	1	1	1	1	1	1	2	1	1	1	1	1	3	4	4	4	4	1	1	1	4
GSM282564	1	1	1	1	1	1	1	1	1	1	1	1	1	1	1	1	1	4	1	1	1	1	1	1	1
GSM282565	5	5	5	5	5	5	5	5	5	5	5	5	5	5	5	5	5	5	5	5	5	5	5	1	5
GSM282566	1	1	1	1	1	1	1	1	1	1	1	1	1	1	1	1	3	1	1	1	1	1	1	1	1
GSM282567	2	2	2	2	2	2	2	2	2	2	2	2	2	2	2	2	2	2	1	2	1	2	2	2	2
GSM282568	2	2	2	2	2	2	2	2	2	2	2	2	2	2	2	2	2	2	2	2	2	2	2	2	2
GSM282569	5	5	5	5	5	5	5	5	5	5	3	5	5	5	5	5	5	3	2	5	3	5	5	5	5
GSM282570	2	2	2	2	2	2	2	2	2	2	2	2	2	2	2	2	2	2	2	2	2	2	2	2	2
GSM282572	INC	2	4	4	1	2	1	1	1	2	1	2	1	2	2	2	2	2	1	4	2	1	1	2	2
GSM36777	1	1	1	1	1	1	1	1	1	1	1	1	1	1	1	1	2	1	1	1	1	1	1	1	1
GSM36778	2	2	2	2	1	1	1	2	2	1	1	2	1	2	1	1	2	1	2	2	1	1	2	2	2
GSM36779	1	1	1	1	1	1	1	1	1	2	1	1	1	1	1	1	1	1	1	1	1	1	1	4	1
GSM36780	INC	3	3	3	1	1	1	1	3	1	3	3	1	3	1	4	2	3	2	3	5	1	3	1	1
GSM36781	3	3	3	3	3	3	3	3	3	3	3	3	3	3	3	3	2	3	3	3	3	3	3	2	3
GSM36782	1	1	1	1	1	1	1	1	1	1	1	1	1	1	1	1	2	1	1	1	1	1	1	1	1
GSM36783	1	1	1	1	1	1	1	1	1	1	1	1	1	1	1	1	2	1	1	1	1	1	1	1	1
GSM36784	1	1	1	1	1	1	1	1	1	1	2	1	1	1	1	1	2	1	1	1	2	1	1	4	1
GSM36785	2	2	2	2	2	2	2	2	2	1	2	2	2	2	2	2	2	2	2	2	2	2	2	2	2
GSM36788	5	5	5	5	5	5	5	5	5	5	3	5	5	5	5	5	5	3	5	5	3	5	5	4	5
GSM36789	2	2	2	2	1	2	2	2	2	2	2	2	2	2	2	2	2	1	2	2	1	2	2	2	2
GSM36790	1	1	1	1	1	1	1	1	1	1	1	1	1	1	1	1	1	1	1	1	1	1	1	1	1
GSM36791	1	1	1	1	1	1	1	1	1	1	1	1	1	1	1	1	2	1	1	1	1	1	1	1	1
GSM36792	2	2	2	2	2	2	2	2	2	2	1	2	1	2	2	2	2	2	2	2	1	2	2	2	2
GSM36793	4	4	4	4	5	4	4	4	4	1	4	4	4	4	1	4	1	4	4	4	4	4	4	4	4
GSM36796	1	2	1	1	1	1	1	1	1	1	1	1	1	1	1	2	2	1	1	1	1	1	1	4	1
GSM36797	5	5	5	5	5	5	5	5	5	5	5	5	5	5	5	5	5	5	5	5	5	5	5	4	5
GSM36798	5	5	5	5	5	5	5	5	5	5	5	5	5	5	5	5	5	5	5	5	5	5	5	4	5
GSM36799	2	2	2	2	1	1	2	1	2	2	1	1	1	2	1	1	2	1	2	2	1	2	2	3	2
GSM36800	2	2	2	2	1	2	2	2	2	2	2	2	2	2	2	2	2	2	2	2	2	2	2	2	2
GSM36801	2	2	2	2	2	2	2	2	2	2	1	2	2	2	2	1	2	2	2	2	1	2	2	2	2
GSM36803	2	1	2	2	1	1	1	2	2	1	2	2	2	2	2	2	2	2	1	2	1	1	1	1	2
GSM36804	1	1	1	1	1	1	1	1	1	1	1	1	1	1	1	1	1	1	1	1	1	1	1	1	1
GSM36805	2	2	2	2	2	2	2	2	2	2	2	2	2	2	2	2	2	2	2	2	2	2	2	2	2
GSM36806	1	1	1	1	1	1	1	1	1	1	1	1	1	1	1	1	1	1	1	1	1	1	1	1	1
GSM36807	INC	4	4	4	1	1	4	4	4	1	4	4	1	1	1	1	3	1	1	4	4	4	1	1	1
GSM36808	INC	3	4	4	1	4	4	4	1	1	2	1	1	1	1	4	3	1	1	4	4	4	1	4	1
GSM36809	5	5	5	5	5	5	5	5	5	5	3	5	5	5	5	5	5	4	5	5	3	5	4	4	5
GSM36810	2	2	2	2	2	2	2	2	2	2	2	2	2	2	2	2	2	2	2	2	2	2	2	2	2
GSM36811	1	1	1	1	1	1	1	1	1	1	1	1	1	1	1	1	2	4	1	1	1	1	1	1	1
GSM36813	1	2	1	1	1	1	1	1	1	2	4	1	1	1	1	1	2	1	2	1	2	1	1	4	1
GSM36814	1	2	3	3	1	1	1	1	1	2	4	1	1	1	1	1	2	1	1	3	1	1	2	1	1
GSM36816	INC	5	3	3	1	5	5	2	1	2	2	1	2	2	2	4	3	1	2	3	4	5	1	1	4
GSM36817	INC	5	5	5	5	4	5	5	5	2	4	1	4	4	4	5	5	4	2	5	4	5	4	4	4
GSM36818	2	2	2	2	2	2	2	2	2	2	2	2	2	2	2	2	2	2	2	2	2	2	2	1	2
GSM36819	1	1	1	1	1	1	1	1	1	1	1	1	1	1	1	1	2	1	1	1	1	1	1	4	1
GSM36820	2	2	2	2	2	2	2	2	2	2	2	2	2	2	2	2	2	2	2	2	1	2	2	1	2
GSM36821	2	2	2	2	1	1	2	2	2	2	1	1	1	2	2	1	2	2	2	2	2	2	2	2	2
GSM36822	5	5	5	5	5	5	5	5	5	5	5	5	5	5	5	5	5	5	5	5	5	5	5	4	5
GSM36824	5	5	5	5	5	5	5	5	5	5	5	5	5	5	4	5	5	5	5	5	5	5	5	4	5
GSM36825	1	1	1	1	1	1	1	1	1	1	1	1	1	1	1	1	1	1	1	1	1	1	1	1	1
GSM36826	1	2	2	2	1	1	1	1	1	1	1	1	1	1	1	2	1	2	2	2	1	1	1	1	1
GSM36827	5	5	5	5	5	5	5	5	5	5	5	5	5	5	5	5	5	5	5	5	5	5	5	4	5
GSM36828	5	5	5	5	5	5	5	5	5	5	5	5	5	5	5	5	5	5	5	5	5	5	5	5	5
GSM36829	2	2	2	2	2	2	2	2	2	2	2	2	1	2	2	2	3	2	2	2	2	2	2	4	2
GSM36830	1	1	2	2	1	1	1	1	2	2	1	1	2	2	2	1	1	1	1	2	1	1	1	1	2
GSM36831	1	1	1	1	1	1	1	1	1	1	1	1	1	1	1	1	1	1	1	1	1	1	1	1	1
GSM36832	1	1	1	1	1	1	1	1	1	1	1	1	1	1	1	1	2	1	1	1	1	1	1	1	1
GSM36833	3	5	3	3	3	3	3	3	3	3	3	3	3	3	3	3	3	3	2	3	3	3	3	2	3
GSM36834	2	2	2	2	2	2	2	2	2	2	2	2	2	2	2	2	2	2	2	2	2	2	2	2	2
GSM36835	5	5	5	5	5	5	5	5	5	5	1	1	5	5	5	5	5	1	3	5	2	5	5	4	4
GSM36836	1	1	1	1	1	1	1	1	1	1	1	1	1	1	1	1	2	1	1	1	2	1	1	1	1
GSM36837	2	2	2	2	1	2	2	2	2	1	2	2	2	2	1	2	2	2	2	2	1	2	2	2	2
GSM36838	INC	2	2	2	1	1	2	1	2	2	1	2	1	1	1	2	2	1	1	2	2	2	1	1	1
GSM36839	1	1	1	1	1	1	1	1	1	1	1	1	1	1	1	1	1	1	1	1	1	1	1	1	1
GSM36841	2	2	2	2	1	2	2	2	2	2	2	2	2	2	2	2	2	2	2	2	1	2	2	2	2
GSM36842	1	2	4	4	1	1	1	1	1	1	2	2	1	1	1	1	2	1	1	4	1	1	2	1	1
GSM36843	1	1	2	2	1	1	1	1	1	2	1	2	1	2	1	1	2	2	1	2	1	1	1	1	2
GSM36844	2	2	2	2	2	2	2	2	2	2	2	2	2	2	2	2	2	1	2	2	2	2	2	1	2
GSM36845	1	1	1	1	1	1	1	1	1	1	1	1	1	1	1	1	1	1	1	1	1	1	1	1	1
GSM36846	5	5	5	5	5	5	5	5	5	5	5	5	5	5	5	5	1	5	5	5	5	5	5	5	5
GSM36847	5	5	5	5	5	5	5	5	5	5	5	5	5	5	1	5	5	5	5	5	5	5	5	5	5
GSM36848	1	1	1	1	1	1	1	1	1	1	4	1	1	1	1	1	1	4	1	1	4	1	1	1	1
GSM36849	1	1	1	1	1	1	1	1	1	2	1	1	1	2	1	1	1	1	1	1	1	1	1	1	1
GSM36850	1	1	1	1	1	1	1	1	2	2	1	2	1	1	1	1	2	2	1	1	2	1	1	1	2
GSM36851	INC	4	4	4	1	1	1	1	1	1	4	4	3	1	1	4	2	4	4	4	4	1	1	4	3
GSM36852	1	1	1	1	1	1	1	1	1	1	1	1	1	1	1	1	1	1	1	1	1	1	1	1	2
GSM36853	1	1	1	1	1	1	1	1	1	1	1	2	1	2	1	1	2	2	2	1	2	1	1	1	2
GSM36854	1	1	1	1	1	1	1	1	2	2	1	1	1	2	2	1	2	1	1	1	1	1	1	1	2
GSM36855	5	5	5	5	5	5	5	5	5	5	5	5	5	5	5	5	5	5	5	5	5	5	5	5	5
GSM36856	2	2	2	2	1	1	2	2	2	2	2	2	1	2	1	2	2	2	2	2	1	2	2	2	2
GSM36857	2	1	2	2	1	1	2	2	2	2	1	1	1	2	2	2	2	2	2	2	1	2	1	2	2
GSM36858	2	3	2	2	2	2	2	2	2	2	3	2	2	2	2	2	2	3	2	2	2	2	2	1	2
GSM36859	1	1	1	1	1	1	1	1	1	1	1	1	1	1	1	1	1	1	1	1	1	1	1	1	1
GSM36860	2	2	2	2	2	2	2	2	2	2	2	2	2	2	2	2	2	2	2	2	2	2	2	2	2
GSM36861	1	1	1	1	1	1	1	1	1	1	1	1	1	1	1	1	2	4	1	1	1	1	1	1	1
GSM36862	5	5	5	5	5	5	5	5	5	5	5	5	5	5	5	5	5	5	5	5	5	5	5	4	5
GSM36863	2	2	2	2	1	1	1	2	2	2	1	2	1	1	1	1	2	1	2	2	2	1	2	2	2
GSM36864	2	2	2	2	2	2	2	2	2	2	2	2	2	2	2	2	2	2	2	2	2	2	2	2	2
GSM36865	5	5	5	5	5	5	5	5	5	5	5	5	5	5	5	5	5	4	5	5	5	5	5	5	5
GSM36866	1	1	1	1	1	1	1	1	1	1	1	1	1	2	1	1	1	1	1	1	1	1	1	1	1
GSM36867	2	2	2	2	1	1	2	1	1	2	1	2	1	2	1	1	2	2	2	2	2	2	1	2	2
GSM36868	1	1	1	1	1	1	1	1	1	1	1	1	1	1	1	1	1	1	1	1	1	1	1	1	1
GSM36870	2	2	2	2	2	2	2	2	2	2	2	2	2	2	2	2	2	2	2	2	2	2	2	2	2
GSM36871	1	1	1	1	1	1	1	1	1	2	1	1	1	1	1	1	1	1	1	1	1	1	1	1	1
GSM36872	2	2	2	2	1	1	2	2	2	2	2	2	2	2	2	2	2	1	2	2	1	2	2	1	2
GSM36873	2	2	2	2	1	2	2	2	2	2	2	2	1	2	2	1	2	1	2	2	1	2	2	2	2
GSM36874	1	2	4	4	1	1	1	1	1	1	1	1	1	1	1	1	2	1	1	4	1	1	2	4	1
GSM36875	5	5	5	5	5	5	5	5	5	5	5	5	5	5	3	5	5	5	5	5	5	5	5	5	5
GSM36876	5	5	5	5	5	5	5	5	5	5	5	5	5	5	5	5	5	5	5	5	5	5	5	5	5
GSM36877	2	2	3	3	2	2	2	2	2	2	3	2	2	2	2	2	3	2	2	3	2	2	2	2	2
GSM36878	2	2	2	2	2	2	2	2	2	2	2	2	2	2	2	2	2	2	2	2	1	2	2	2	2
GSM36879	1	3	3	3	1	1	1	3	3	3	1	1	3	1	1	1	3	1	1	3	4	1	1	4	1
GSM36880	1	1	1	1	1	1	1	1	1	1	1	1	1	1	1	1	3	4	4	1	1	1	1	1	1
GSM36881	2	2	2	2	2	2	2	2	2	2	2	2	2	2	2	2	2	2	2	2	2	2	2	2	2
GSM36882	1	4	4	4	1	1	1	1	1	1	1	1	1	1	1	1	2	4	2	4	1	1	1	4	1
GSM36883	1	1	4	4	1	1	1	1	4	1	1	1	1	1	1	1	2	1	2	4	1	1	1	1	1
GSM36884	2	2	3	3	2	2	2	2	2	2	2	2	2	2	2	2	2	1	2	3	2	2	2	1	2
GSM36885	1	4	4	4	1	1	1	1	1	1	4	4	1	1	1	1	3	4	4	4	4	1	1	4	1
GSM36886	INC	3	3	3	1	2	2	2	2	2	2	2	1	1	1	3	3	4	2	3	4	2	1	2	2
GSM36887	1	1	1	1	1	1	1	1	1	2	1	1	1	1	1	1	1	1	1	1	1	1	1	1	1
GSM36888	1	2	2	2	1	1	1	2	2	1	2	2	1	1	1	2	2	1	1	2	1	1	2	1	1
GSM36889	2	2	2	2	2	2	2	2	1	1	2	2	2	2	2	2	2	2	2	2	1	2	1	1	2
GSM36890	1	4	4	4	1	1	1	3	4	1	3	1	1	1	1	1	3	1	4	4	4	1	1	4	1
GSM36891	5	5	5	5	5	5	5	5	5	5	5	5	5	4	1	5	5	5	5	5	5	5	5	5	5
GSM36892	INC	2	2	2	1	1	2	2	1	1	1	1	1	2	1	1	2	1	2	2	1	2	2	1	2
GSM36893	1	2	2	2	1	1	1	1	2	2	1	1	1	1	1	1	2	2	2	2	1	1	2	1	2
GSM36894	1	4	4	4	1	1	1	1	1	1	1	1	1	1	1	1	3	1	1	4	1	1	1	4	1
GSM36895	1	1	1	1	1	1	1	1	2	2	1	2	1	2	1	1	1	1	1	1	1	1	1	2	2
GSM36896	1	1	1	1	1	1	1	1	1	2	1	1	2	1	1	1	1	1	1	1	1	1	1	2	2
GSM36897	1	2	4	4	1	1	1	1	1	1	1	1	1	1	1	1	2	1	1	4	1	1	1	1	1
GSM36898	1	4	4	4	1	1	1	1	1	1	1	1	1	1	1	1	3	1	1	4	1	1	1	4	1
GSM36899	2	2	2	2	2	2	2	2	2	2	2	2	2	2	2	2	2	2	2	2	2	2	2	2	2
GSM36901	5	5	5	5	5	5	5	5	5	5	5	5	5	5	5	5	5	5	5	5	5	5	5	5	5
GSM36902	4	4	4	4	5	4	4	4	4	4	4	4	1	1	1	1	5	4	2	4	4	4	4	4	5
GSM36903	2	2	2	2	2	2	2	2	2	2	2	2	2	2	2	2	2	2	2	2	2	2	2	2	2
GSM36904	1	3	3	3	1	1	1	1	3	3	1	1	1	1	1	1	1	1	2	3	2	1	1	1	1
GSM36905	INC	4	4	4	5	5	5	5	5	1	4	5	5	2	2	5	1	3	4	4	4	5	4	3	5
GSM36906	INC	3	3	3	2	2	2	5	5	2	3	3	2	5	2	3	3	4	2	3	3	2	3	3	3
GSM36907	1	1	1	1	1	1	1	1	1	1	1	1	1	1	1	1	2	1	2	1	2	1	1	1	2
GSM36908	2	2	2	2	2	2	2	2	2	2	2	2	2	2	2	2	2	2	2	2	2	2	2	2	2
GSM36909	4	4	4	4	5	4	4	4	4	1	1	1	4	4	4	4	5	4	4	4	4	4	1	1	4
GSM36910	1	1	1	1	1	1	1	1	1	1	1	1	1	1	1	1	2	1	1	1	1	1	1	1	1
GSM36911	2	1	2	2	1	1	2	2	2	2	2	2	2	2	2	1	2	2	1	2	1	2	1	1	2
GSM36912	5	5	5	5	5	5	5	5	5	5	5	5	5	5	5	5	5	5	5	5	5	5	5	5	5
GSM36914	1	1	1	1	1	1	1	1	1	1	1	1	1	1	1	1	2	1	1	1	2	1	1	4	1
GSM36915	INC	4	4	4	1	1	1	1	4	4	1	4	1	4	1	1	3	4	2	4	3	1	1	1	3
GSM36916	1	4	4	4	1	1	1	1	1	1	1	1	1	1	1	1	1	1	1	4	1	1	1	1	1
GSM36917	1	2	1	1	1	1	1	1	1	2	1	1	1	1	1	1	2	1	1	1	1	1	1	4	1
GSM36918	4	5	5	5	4	4	4	4	5	4	4	4	1	4	4	4	3	4	5	5	4	4	5	4	1
GSM36919	1	2	1	1	1	1	1	1	1	2	1	1	1	1	1	1	2	1	1	1	2	1	1	1	1
GSM36920	1	2	2	2	1	1	1	2	2	1	1	2	1	2	1	1	2	1	2	2	1	1	2	1	1
GSM36921	2	2	2	2	1	1	2	1	2	1	1	2	2	2	1	1	2	1	2	2	1	2	2	2	2
GSM36922	2	2	2	2	1	2	2	2	2	2	2	2	2	2	2	2	2	2	2	2	2	2	2	2	2
GSM36923	5	5	5	5	5	5	5	5	5	5	4	5	5	5	1	5	5	4	3	5	4	5	4	4	5
GSM36924	2	2	2	2	2	2	2	2	2	2	2	2	1	2	2	1	2	1	2	2	1	2	2	2	2
GSM36925	1	1	1	1	1	1	1	1	1	1	1	1	1	1	1	1	1	1	1	1	1	1	1	1	1
GSM36926	3	3	3	3	1	3	3	3	3	2	1	3	1	3	3	3	3	3	2	3	3	3	3	2	3
GSM36927	5	5	5	5	5	5	5	5	5	5	5	5	5	5	5	5	5	5	5	5	5	5	5	5	5
GSM36928	1	1	1	1	1	1	1	1	1	1	1	2	1	1	1	2	1	1	1	1	1	1	1	1	1
GSM36930	2	2	2	2	1	2	2	2	2	2	2	2	2	2	2	2	2	2	2	2	1	2	2	2	2
GSM36931	5	5	5	5	5	5	5	5	5	5	5	5	5	5	5	5	5	4	5	5	5	5	5	4	5
GSM36932	1	1	4	4	1	1	1	1	4	1	1	1	1	1	1	1	1	1	1	4	1	1	1	1	1
GSM36933	2	2	2	2	2	1	2	2	1	2	1	1	1	2	2	2	2	3	1	2	1	2	1	2	2
GSM36934	2	2	3	3	1	2	2	2	2	2	2	2	2	2	2	2	2	1	1	3	2	2	2	4	1
GSM36935	5	5	5	5	5	5	5	5	5	5	5	5	5	5	5	5	5	4	5	5	5	5	5	4	5
GSM36937	5	5	5	5	5	5	5	5	5	5	5	5	5	5	5	5	5	5	5	5	5	5	5	5	5
GSM36938	2	2	2	2	2	2	2	2	2	2	2	2	2	2	2	2	2	2	2	2	2	2	2	2	2
GSM36939	2	2	2	2	2	2	2	2	2	2	2	2	2	2	2	2	2	2	1	2	1	2	2	1	2
GSM36940	5	5	5	5	5	5	5	5	5	5	5	5	5	5	5	5	5	5	5	5	5	5	5	5	5
GSM36941	5	5	5	5	5	5	5	5	5	5	5	5	5	5	5	5	5	5	5	5	5	5	5	5	5
GSM36942	1	1	1	1	1	1	1	1	1	1	1	1	1	1	1	1	1	1	1	1	1	1	1	1	2
GSM36944	1	4	4	4	1	1	1	1	1	1	1	1	1	1	1	1	2	1	1	4	1	1	1	4	1
GSM36945	1	1	1	1	1	1	1	1	1	1	1	1	1	1	1	1	2	1	1	1	1	1	1	1	1
GSM36946	2	2	2	2	2	2	2	2	2	2	2	2	2	2	2	2	2	2	2	2	1	2	2	2	2
GSM36947	2	2	2	2	2	2	2	2	2	2	2	2	2	2	2	2	2	2	2	2	1	2	2	2	2
GSM36948	2	2	2	2	2	2	2	2	2	2	2	2	2	2	2	2	2	2	2	2	2	2	2	2	2
GSM36949	5	5	5	5	5	5	5	5	5	2	3	5	5	5	2	5	1	3	4	5	3	5	5	3	5
GSM36950	1	1	1	1	1	1	1	1	1	2	1	1	1	1	1	1	2	1	1	1	1	1	1	1	1
GSM36951	2	2	2	2	1	1	1	1	1	2	2	2	2	2	1	2	2	2	2	2	2	1	2	2	2
GSM36952	5	5	5	5	5	5	5	5	5	5	5	5	5	5	5	5	5	5	5	5	5	5	5	4	5
GSM36953	1	3	3	3	1	1	1	3	1	2	1	1	1	1	1	1	2	1	1	3	2	1	2	4	1
GSM36954	2	2	2	2	2	2	2	2	2	2	2	2	2	2	2	2	2	2	2	2	2	2	2	2	2
GSM36955	3	3	3	3	3	3	2	3	5	2	3	3	3	2	3	3	3	4	3	3	3	2	3	1	3
GSM36957	1	1	1	1	1	1	1	1	1	1	1	1	1	1	1	1	2	1	1	1	1	1	1	1	1
GSM36958	INC	4	4	4	1	4	1	4	1	1	1	1	1	1	1	4	3	4	2	4	4	1	1	4	1
GSM36959	5	5	5	5	5	5	5	5	5	5	5	5	5	5	5	5	5	3	5	5	5	5	5	5	5
GSM36960	5	5	5	5	5	5	5	5	5	5	5	5	5	5	5	5	5	4	5	5	5	5	5	5	5
GSM36961	3	3	5	5	3	3	3	3	4	3	3	3	3	3	3	3	3	3	4	5	3	3	3	5	3
GSM36962	1	1	1	1	1	1	1	1	1	1	1	1	1	1	1	1	1	1	1	1	1	1	1	1	1
GSM36963	2	2	2	2	1	2	2	2	2	2	1	1	1	1	2	1	2	1	2	2	1	2	1	1	2
GSM36964	3	3	3	3	3	3	3	3	3	3	3	3	3	3	3	3	3	4	3	3	3	3	3	5	3
GSM36965	1	1	1	1	1	1	1	1	1	1	1	1	1	1	1	1	2	4	2	1	1	1	1	1	1
GSM36966	5	5	5	5	5	5	5	5	5	2	5	5	5	5	5	5	5	5	5	5	5	5	5	5	5
GSM36967	1	2	2	2	1	1	1	2	2	2	1	1	1	1	1	1	2	1	2	2	1	1	1	2	2
GSM36968	3	3	3	3	2	3	5	3	3	3	3	3	3	5	2	3	2	3	3	3	3	5	3	1	3
GSM36969	5	5	5	5	5	5	5	5	5	5	5	5	5	5	5	5	5	5	5	5	5	5	5	5	5
GSM36970	1	1	1	1	1	1	1	1	1	1	1	1	1	1	1	1	1	1	1	1	1	1	1	4	1
GSM36971	1	2	1	1	1	1	1	1	1	1	1	1	1	1	1	1	2	1	1	1	1	1	1	1	1
GSM36972	2	2	2	2	1	1	1	2	2	2	2	2	2	2	1	2	2	2	2	2	2	1	1	1	2
GSM36973	1	1	1	1	1	1	1	1	2	2	1	1	1	1	1	1	1	1	1	1	1	1	1	1	2
GSM36974	2	2	2	2	2	2	2	2	2	2	2	2	2	2	2	2	2	2	2	2	2	2	2	2	2
GSM36975	INC	3	2	2	1	1	1	1	2	1	3	3	1	1	1	1	2	3	3	2	3	1	3	1	3
GSM36976	1	2	4	4	1	1	1	1	1	1	1	1	1	1	1	1	2	1	1	4	2	1	1	1	1
GSM36977	5	5	5	5	5	5	5	5	5	5	5	5	5	4	5	5	5	5	5	5	5	5	5	4	5
GSM36978	1	4	4	4	1	1	1	1	1	1	1	4	1	1	1	1	2	4	2	4	3	1	1	4	3
GSM36979	2	2	2	2	2	2	2	2	2	2	2	2	2	2	2	2	2	2	2	2	2	2	2	2	2
GSM36980	1	1	1	1	1	1	1	1	1	2	1	1	1	1	1	1	1	1	1	1	1	1	1	1	1
GSM36981	5	5	5	5	5	5	5	5	5	5	5	5	5	5	5	5	5	5	5	5	5	5	5	5	5
GSM36982	4	4	4	4	1	4	4	4	4	1	4	4	4	1	1	1	4	4	4	4	4	4	1	4	1
GSM36983	1	1	1	1	1	1	1	1	1	1	1	1	1	1	1	1	3	1	1	1	1	1	1	1	1
GSM36984	2	2	2	2	2	2	2	2	1	2	2	2	2	2	2	2	2	2	1	2	1	2	2	2	2
GSM36985	2	2	2	2	1	2	2	2	2	2	2	2	2	2	2	2	2	1	2	2	2	2	2	1	2
GSM36986	1	1	1	1	1	1	1	1	1	1	1	1	1	1	1	1	2	1	1	1	1	1	1	2	1
GSM36987	1	2	1	1	1	1	1	1	1	1	1	1	1	1	1	1	2	4	1	1	2	1	1	1	1
GSM36988	2	2	2	2	1	1	2	1	2	2	2	1	1	1	1	1	2	1	2	2	1	2	2	1	2
GSM36989	2	2	2	2	2	2	2	2	2	2	2	2	1	2	2	2	2	2	2	2	1	2	2	2	2
GSM36990	1	1	1	1	1	1	1	1	1	1	1	1	1	1	1	1	1	1	1	1	1	1	1	2	1
GSM36991	5	5	5	5	5	5	5	5	5	5	5	5	5	5	5	5	5	5	5	5	5	5	5	5	3
GSM36994	1	1	1	1	1	1	1	1	1	1	1	1	1	1	1	1	2	1	1	1	1	1	1	1	1
GSM36995	2	2	2	2	2	2	2	2	2	2	2	2	2	2	2	2	2	2	2	2	1	2	2	2	2
GSM36996	2	2	3	3	1	2	2	2	2	2	2	2	2	2	2	2	2	1	1	3	2	2	2	1	1
GSM36997	2	2	2	2	2	2	2	2	2	2	2	2	2	2	2	2	2	2	2	2	2	2	2	2	2
GSM36998	1	1	1	1	1	1	1	1	1	1	1	1	1	1	1	1	1	1	1	1	1	1	1	1	1
GSM36999	1	1	1	1	1	1	1	1	1	1	1	1	1	1	1	1	2	1	1	1	1	1	1	1	1
GSM37000	1	1	1	1	1	1	1	1	1	1	1	1	1	1	1	1	1	1	1	1	1	1	1	1	1
GSM37001	1	1	4	4	1	1	1	1	1	1	1	1	1	1	1	1	2	1	1	4	1	1	1	1	1
GSM37002	5	5	5	5	5	5	5	5	5	5	5	5	5	5	5	5	5	4	5	5	5	5	5	5	5
GSM37003	2	2	2	2	2	2	2	2	2	2	2	2	2	2	2	2	2	2	2	2	2	2	2	2	2
GSM37004	2	2	2	2	2	1	2	2	1	2	2	2	2	2	2	2	2	2	1	2	1	2	1	1	2
GSM37005	1	1	1	1	1	1	1	1	1	1	1	1	1	1	1	1	1	1	1	1	1	1	1	2	2
GSM37006	2	2	2	2	2	2	2	2	2	1	2	2	2	1	2	2	2	1	2	2	1	2	2	2	2
GSM37007	2	2	2	2	2	2	2	2	2	2	2	2	2	2	2	2	2	2	2	2	2	2	2	2	2
GSM37008	INC	1	2	2	1	1	1	1	2	1	2	2	2	2	2	1	2	2	2	2	1	1	1	1	1
GSM37009	1	1	1	1	1	1	1	1	1	2	1	1	1	1	1	1	2	1	2	1	1	1	1	1	1
GSM37010	1	1	2	2	1	1	1	1	1	1	1	1	1	2	1	1	2	2	1	2	1	1	2	2	2
GSM37011	1	1	1	1	1	1	1	2	1	2	2	1	2	2	2	1	2	2	1	1	1	1	1	1	2
GSM37012	1	1	1	1	1	1	1	1	1	1	1	1	1	1	1	1	1	1	1	1	1	1	1	1	1
GSM37013	1	1	1	1	1	1	1	1	1	1	1	1	1	2	1	1	1	1	1	1	1	1	1	1	2
GSM37014	2	2	2	2	1	2	2	2	2	2	2	2	1	2	2	1	2	1	2	2	2	2	2	2	2
GSM37015	1	1	1	1	1	1	1	1	1	1	1	1	1	1	1	1	1	1	1	1	1	1	1	1	1
GSM37016	3	3	3	3	3	3	2	3	3	2	3	3	3	2	3	3	2	3	3	3	3	2	3	3	3
GSM37017	5	5	5	5	5	5	5	5	5	5	5	5	5	5	5	5	5	5	5	5	5	5	5	3	5
GSM37018	2	2	2	2	2	2	2	2	2	2	2	2	2	2	2	2	2	2	2	2	2	2	2	2	2
GSM37019	1	2	4	4	1	1	1	1	1	1	1	1	1	1	1	1	2	1	1	4	2	1	1	4	1
GSM37020	INC	3	3	3	2	2	3	3	3	2	2	2	2	3	3	2	2	3	2	3	2	3	2	3	2
GSM37021	5	5	5	5	5	5	5	5	5	5	5	5	5	5	5	5	5	5	5	5	5	5	5	5	5
GSM37022	5	5	5	5	5	5	5	5	5	5	5	5	5	5	5	5	5	5	5	5	5	5	5	3	5
GSM37023	3	3	3	3	1	3	3	3	3	2	3	3	1	3	3	3	2	3	3	3	3	3	3	1	3
GSM37024	1	1	1	1	1	1	1	1	1	1	1	1	1	1	1	1	2	1	1	1	1	1	1	1	1
GSM37025	1	1	1	1	1	1	1	1	1	2	1	1	1	1	1	1	2	1	1	1	2	1	1	1	1
GSM37026	1	1	1	1	1	1	1	1	1	1	1	1	1	1	1	1	1	2	2	1	1	1	1	1	1
GSM37027	1	2	4	4	1	1	1	1	1	1	1	1	1	1	1	1	2	1	2	4	1	1	2	2	1
GSM37028	1	1	1	1	1	1	1	1	1	1	1	1	1	1	1	1	2	1	1	1	2	1	1	1	1
GSM37029	2	2	2	2	1	1	2	2	2	2	1	1	1	2	2	2	2	2	2	2	1	2	2	2	2
GSM37031	2	2	2	2	2	2	2	2	2	2	2	2	2	2	2	2	2	2	2	2	2	2	2	2	2
GSM37032	1	1	1	1	1	1	1	1	1	1	1	1	1	1	1	1	2	2	2	1	1	1	1	1	1
GSM37033	1	1	4	4	1	1	1	1	1	2	4	1	1	1	1	1	2	1	1	4	1	1	1	4	1
GSM37034	3	3	3	3	3	3	3	3	3	2	3	3	3	2	3	3	2	3	3	3	3	3	3	2	3
GSM37035	2	2	2	2	2	2	2	2	2	2	2	2	2	2	2	2	2	2	2	2	2	2	2	2	2
GSM37036	2	2	2	2	2	2	2	2	2	1	1	2	2	2	2	1	2	2	1	2	1	2	1	1	1
GSM37037	2	1	2	2	2	1	1	2	2	1	2	2	2	2	2	2	2	2	2	2	2	1	2	2	2
GSM37038	2	2	2	2	2	2	2	2	2	2	2	2	1	2	2	1	2	1	2	2	2	2	2	2	2
GSM37039	1	1	1	1	1	1	1	1	1	1	1	1	1	1	1	1	1	1	1	1	1	1	1	1	2
GSM37040	5	5	5	5	5	5	5	5	5	5	3	5	5	5	5	5	5	4	3	5	3	5	5	5	5
GSM37041	1	4	4	4	1	1	1	1	1	1	1	1	1	1	1	1	3	4	4	4	4	1	1	4	1
GSM37042	3	3	3	3	2	3	2	3	3	2	3	3	2	3	2	3	3	3	2	3	3	2	3	2	3
GSM37043	5	5	5	5	5	5	5	5	5	5	5	5	5	5	5	5	5	5	5	5	5	5	5	4	5
GSM37044	1	1	1	1	1	1	1	1	1	1	1	3	1	1	1	1	2	3	1	1	1	1	1	1	1
GSM37045	5	5	5	5	5	5	5	5	5	1	3	5	5	5	5	5	1	3	3	5	3	5	3	1	5
GSM37046	1	1	1	1	1	1	1	1	1	1	1	1	1	2	1	2	1	1	1	1	1	1	1	1	2
GSM37047	5	5	5	5	5	5	5	5	5	5	3	5	5	5	1	5	5	3	3	5	3	5	5	5	5
GSM37048	4	4	4	4	5	4	4	5	5	3	4	4	5	4	5	4	5	4	3	4	4	4	4	4	5
GSM37049	1	4	1	1	1	1	1	1	1	1	1	1	1	1	1	1	3	4	4	1	4	1	1	1	1
GSM37051	5	5	5	5	5	5	5	5	5	5	4	5	5	4	5	5	5	4	3	5	4	5	4	4	5
GSM37052	4	4	4	4	4	4	4	3	4	1	4	5	4	4	1	4	5	4	1	4	4	4	4	4	5
GSM37054	3	3	3	3	2	2	2	3	3	3	3	3	1	2	2	3	3	3	2	3	3	2	3	2	3
GSM37055	2	3	3	3	2	3	2	3	2	2	2	2	2	2	2	2	2	2	2	3	2	2	2	2	2
GSM37056	1	4	4	4	1	1	1	1	1	1	4	1	1	1	1	1	3	4	4	4	4	1	1	4	1
GSM37057	2	2	2	2	2	1	1	2	2	1	1	2	2	2	2	1	3	2	2	2	1	1	1	2	2
GSM37058	2	2	2	2	2	2	2	2	2	2	2	2	2	2	2	2	2	2	2	2	2	2	2	4	2
GSM37059	1	1	1	1	1	1	1	1	1	1	1	1	1	1	1	1	1	1	1	1	1	1	1	1	1
GSM37060	1	2	4	4	1	1	1	1	1	1	2	1	1	1	1	1	2	1	1	4	1	1	1	4	1
GSM37061	1	1	1	1	1	1	1	1	1	1	1	1	1	1	1	1	1	1	1	1	1	1	1	1	1
GSM37062	2	2	3	3	1	2	2	2	2	2	2	2	2	2	1	2	3	1	2	3	1	2	2	2	2
GSM50034	2	3	3	3	3	3	2	2	3	2	2	2	2	2	2	2	2	2	2	3	1	2	2	2	2
GSM50035	5	5	5	5	5	5	5	5	5	5	5	5	5	5	5	5	5	5	5	5	5	5	5	5	5
GSM50036	1	2	2	2	1	1	1	2	1	2	2	1	1	1	1	1	3	1	2	2	1	1	1	2	2
GSM50037	2	2	2	2	2	2	2	2	2	2	2	2	1	2	2	2	2	2	2	2	1	2	2	1	2
GSM50038	2	2	2	2	2	2	2	2	2	2	2	2	2	2	2	2	2	2	2	2	1	2	2	2	2
GSM50039	2	2	2	2	2	2	2	2	2	2	2	2	2	2	2	2	2	2	2	2	2	2	2	2	2
GSM50040	5	5	5	5	5	5	5	5	5	5	5	5	5	5	5	5	5	5	5	5	5	5	5	5	5
GSM50041	5	5	5	5	5	5	5	5	5	5	5	5	5	5	5	5	5	4	5	5	5	5	5	3	5
GSM50042	5	5	5	5	5	5	5	5	5	4	4	1	1	4	4	5	5	1	5	5	2	5	4	4	4
GSM50043	2	2	2	2	2	2	2	2	2	2	2	2	2	2	2	2	2	2	2	2	2	2	2	2	2
GSM50044	2	2	2	2	2	2	2	2	2	1	2	2	1	2	2	2	2	2	2	2	1	2	2	2	2
GSM50045	5	5	5	5	5	5	5	5	5	5	4	5	5	5	5	5	5	4	2	5	4	5	5	1	5
GSM50046	5	5	5	5	5	5	5	5	5	5	5	5	5	5	5	5	5	5	5	5	5	5	5	5	5
GSM50047	1	1	1	1	1	1	1	1	1	2	1	1	1	1	1	1	1	1	1	1	1	1	1	2	2
GSM50048	5	5	5	5	5	5	5	5	5	5	4	5	5	5	5	5	5	5	5	5	4	5	5	4	5
GSM50049	1	1	1	1	1	1	1	1	1	1	1	1	1	1	1	1	1	1	1	1	1	1	1	1	1
GSM50050	5	5	5	5	5	5	5	5	5	5	4	5	5	5	4	5	5	5	5	5	4	5	5	4	5
GSM50051	4	4	4	4	1	1	1	1	4	4	4	4	1	1	1	1	4	4	4	4	4	1	1	4	1
GSM50052	5	5	5	5	5	5	5	5	5	5	4	5	5	4	5	5	5	5	3	5	4	5	5	5	5
GSM50053	1	1	1	1	1	1	1	1	2	2	1	1	1	2	1	1	1	1	1	1	1	1	1	2	2
GSM50054	5	5	5	5	5	5	5	5	5	5	5	5	5	5	5	5	5	5	5	5	5	5	5	4	5
GSM50055	5	5	5	5	5	5	5	5	5	5	4	5	5	4	4	5	5	4	2	5	4	5	5	4	5
GSM50056	2	2	2	2	2	2	2	2	2	2	3	2	2	2	2	2	3	2	2	2	3	2	2	2	2
GSM50057	5	5	5	5	5	5	5	5	5	5	5	5	5	5	5	5	5	5	5	5	5	5	5	5	5
GSM50058	INC	4	4	4	5	5	5	5	5	3	4	4	4	5	3	5	5	4	2	4	4	5	4	1	5
GSM50059	2	2	2	2	2	2	2	2	2	2	2	2	2	2	2	2	2	2	2	2	1	2	2	2	2
GSM50060	3	3	3	3	3	2	2	3	3	2	3	3	2	2	3	3	3	3	2	3	3	2	3	2	1
GSM50061	5	4	4	4	5	5	5	5	5	4	4	5	5	5	4	5	5	4	2	4	4	5	5	1	5
GSM50062	2	2	2	2	2	2	2	2	2	2	2	2	2	2	2	2	2	2	2	2	2	2	2	1	2
GSM50063	5	5	5	5	5	5	5	5	5	1	4	5	5	5	4	5	5	4	4	5	4	5	5	4	5
GSM50064	4	4	4	4	5	4	4	4	4	4	4	4	5	5	4	4	5	4	4	4	4	4	4	4	5
GSM50065	1	4	3	3	1	1	1	2	4	1	1	1	1	4	1	1	3	4	2	3	1	1	1	1	2
GSM50066	INC	4	4	4	5	3	2	5	5	2	4	4	3	2	2	5	5	4	5	4	4	2	5	2	5
GSM50067	5	5	5	5	5	5	5	5	5	5	5	5	5	5	5	5	5	5	5	5	5	5	5	2	5
GSM50068	1	1	2	2	1	1	1	1	1	1	2	2	2	2	1	1	1	2	2	2	1	1	1	1	1
GSM50069	5	4	4	4	5	5	5	5	5	1	4	5	5	5	3	5	5	4	5	4	4	5	4	4	5
GSM50070	3	3	3	3	3	3	3	3	5	5	3	3	3	3	3	3	3	3	3	3	3	3	3	1	3
GSM50071	1	1	3	3	3	1	1	1	1	1	1	1	2	2	1	1	1	4	1	3	1	1	1	4	2
GSM50072	INC	3	3	3	1	4	1	3	4	1	3	4	1	4	1	4	2	4	2	3	3	1	1	1	3
GSM50073	5	5	5	5	5	5	5	5	5	1	5	5	5	5	5	5	1	3	5	5	5	5	5	4	5
GSM50074	1	1	4	4	1	1	1	1	1	1	1	1	1	1	1	1	1	1	1	4	1	1	1	1	1
GSM50075	INC	4	4	4	1	1	1	1	1	1	4	1	1	4	1	3	5	3	2	4	4	1	1	2	5
GSM50076	1	1	1	1	1	1	1	1	1	1	1	1	1	1	1	1	2	1	1	1	1	1	2	1	1
GSM50077	1	1	1	1	1	1	1	1	1	1	1	1	1	1	1	1	2	1	1	1	1	1	1	1	1
GSM50078	5	5	5	5	5	5	5	5	5	3	4	5	5	5	5	4	5	4	3	5	4	5	5	4	5
GSM50079	5	5	5	5	5	5	5	5	5	5	5	5	5	4	5	5	5	5	5	5	5	5	5	5	5
GSM50080	1	1	1	1	1	1	1	1	1	1	4	1	1	1	1	1	1	1	1	1	4	1	1	2	1
GSM50081	1	1	1	1	1	1	1	1	1	1	1	1	1	1	1	1	1	1	1	1	1	1	1	1	1
GSM50082	1	4	4	4	1	1	4	4	4	1	1	1	1	1	1	1	3	1	1	4	1	4	1	1	1
GSM50083	2	2	2	2	1	1	1	2	2	1	2	2	2	2	2	2	2	2	2	2	2	1	2	2	2
GSM50084	INC	2	3	3	1	1	2	2	2	1	3	2	1	2	3	2	3	2	2	3	1	2	1	1	2
GSM50085	2	2	2	2	2	2	2	2	2	2	2	2	2	2	2	2	2	2	2	2	2	2	2	2	2
GSM50086	2	2	2	2	1	2	2	2	2	1	1	1	1	2	2	1	2	1	2	2	1	2	2	2	2
GSM50087	2	2	2	2	2	2	2	2	2	2	1	2	2	2	2	2	1	2	2	2	3	2	1	2	2
GSM50088	1	4	4	4	1	4	4	4	4	1	1	4	1	1	1	1	3	1	1	4	1	4	1	1	1
GSM50089	4	4	4	4	5	4	4	4	4	1	4	4	4	4	4	4	1	4	4	4	4	4	4	4	1
GSM50090	1	1	1	1	2	1	1	2	1	1	1	1	1	1	1	1	1	1	1	1	1	1	1	1	1
GSM50091	2	2	2	2	2	2	2	2	2	2	2	2	2	2	2	2	2	2	2	2	2	2	2	1	2
GSM50092	INC	3	4	4	5	3	5	5	2	1	2	2	4	2	4	2	3	4	4	4	2	5	3	4	2
GSM50093	5	5	5	5	5	5	5	5	5	5	5	5	5	5	5	5	5	5	5	5	5	5	5	4	5
GSM50094	5	5	5	5	5	5	5	5	5	5	5	5	5	5	5	5	5	4	5	5	5	5	5	4	5
GSM50095	1	1	1	1	1	1	1	1	1	1	1	1	1	1	1	1	2	1	1	1	1	1	1	2	1
GSM50096	5	5	5	5	5	5	5	5	5	5	4	5	5	5	5	5	5	4	2	5	4	5	5	4	5
GSM50097	INC	2	2	2	1	1	1	2	2	2	1	1	1	2	2	1	2	1	1	2	1	1	2	1	2
GSM50098	1	1	1	1	1	1	1	1	1	1	1	1	1	1	1	1	1	1	1	1	1	1	1	1	1
GSM50099	2	2	2	2	2	2	2	2	2	1	2	2	2	2	2	2	2	2	2	2	2	2	2	2	2
GSM50100	1	4	4	4	1	1	1	1	4	1	1	1	1	1	1	1	1	1	1	4	1	1	1	1	1
GSM50101	INC	1	2	2	1	1	2	1	1	1	2	2	1	2	1	2	2	2	1	2	1	2	1	1	2
GSM50102	5	5	5	5	5	5	5	5	5	5	5	5	5	5	5	5	5	5	5	5	5	5	5	5	5
GSM50103	5	5	5	5	5	5	5	5	3	2	3	5	3	5	3	5	5	4	2	5	3	5	3	4	5
GSM50105	2	2	2	2	2	2	2	2	2	1	2	2	2	2	2	2	2	2	1	2	1	2	2	1	2
GSM50106	5	5	5	5	5	5	5	5	5	5	5	5	5	5	5	5	5	4	5	5	5	5	5	4	5
GSM50107	5	5	5	5	5	5	5	5	5	5	5	5	5	5	5	5	5	5	5	5	5	5	5	1	5
GSM50109	1	2	1	1	1	1	1	2	2	1	1	1	2	1	2	1	2	1	1	1	2	1	1	1	1
GSM50110	5	5	5	5	5	5	5	5	5	1	2	1	1	5	2	5	5	4	2	5	2	5	5	4	4
GSM50111	1	1	1	1	1	1	1	1	1	1	1	1	1	1	1	1	1	1	1	1	1	1	1	1	2
GSM50112	5	5	5	5	5	5	5	5	5	2	5	5	5	5	5	5	1	5	5	5	5	5	5	1	5
GSM50113	1	1	1	1	1	1	1	1	1	1	1	1	1	1	1	1	1	1	1	1	1	1	1	1	1
GSM50115	1	2	2	2	1	1	1	1	2	2	1	1	1	1	1	1	2	2	2	2	1	1	2	1	1
GSM50116	1	4	4	4	1	1	1	1	1	1	1	1	1	1	1	1	1	1	1	4	1	1	1	4	1
GSM50117	2	2	2	2	2	2	2	2	2	2	2	2	2	2	2	2	2	2	2	2	2	2	2	2	2
GSM50118	2	2	2	2	2	2	2	2	2	2	2	2	2	2	2	2	2	2	2	2	2	2	2	2	2
GSM50119	5	5	5	5	5	5	5	5	5	5	5	5	5	5	4	5	5	5	5	5	5	5	5	4	5
GSM50120	1	2	1	1	1	1	1	1	1	1	1	1	1	1	1	1	1	1	1	1	1	1	1	1	2
GSM50121	2	1	2	2	2	1	2	2	2	1	1	2	2	2	2	1	1	1	1	2	1	2	1	1	2
GSM50122	2	2	2	2	2	2	2	2	1	1	2	2	1	2	2	2	2	2	1	2	2	2	2	1	2
GSM50123	5	5	5	5	5	5	5	5	5	2	5	5	5	5	5	5	5	4	5	5	5	5	5	1	5
GSM50124	1	1	1	1	1	1	1	1	1	1	1	1	1	2	1	1	1	1	1	1	1	1	1	1	2
GSM50125	INC	3	3	3	2	2	2	3	3	2	1	3	2	2	2	3	2	3	2	3	3	2	2	2	3
GSM50126	1	2	4	4	1	1	1	1	4	2	1	1	1	1	1	1	2	1	1	4	1	1	1	2	2
GSM50127	1	3	3	3	1	1	1	1	4	1	1	2	1	1	1	1	2	1	2	3	2	1	1	1	2
GSM50128	2	2	2	2	1	1	1	2	2	2	1	2	1	2	1	2	2	2	2	2	1	1	1	2	2
GSM50129	2	2	2	2	1	1	1	2	2	2	2	1	1	1	1	1	2	1	2	2	2	1	2	1	2
GSM50130	INC	3	3	3	1	5	5	3	3	3	1	3	1	3	4	5	2	3	2	3	3	5	2	1	3
GSM50131	2	2	2	2	2	2	2	2	2	2	2	2	2	2	2	2	2	2	2	2	2	2	2	2	2
GSM505342	3	3	3	3	2	3	3	3	3	2	1	3	3	3	2	3	2	3	2	3	3	3	3	3	1
GSM505350	INC	2	3	3	2	3	1	2	3	2	1	1	3	2	3	2	3	3	2	3	1	1	1	2	1
GSM505377	3	3	3	3	3	3	3	3	3	3	3	3	2	3	3	3	3	3	2	3	3	3	3	2	3
GSM505379	2	2	2	2	1	2	2	2	2	2	2	2	2	2	2	2	2	2	2	2	2	2	2	3	2
GSM505381	3	3	3	3	3	3	3	3	3	2	1	3	3	3	3	3	1	3	2	3	3	3	3	1	3
GSM505383	1	1	1	1	1	1	1	1	1	1	1	1	1	1	1	1	3	1	1	1	1	1	1	1	1
GSM505385	2	3	3	3	2	2	2	2	3	2	2	2	2	2	2	2	2	2	2	3	2	2	2	2	2
GSM505387	3	3	3	3	3	3	3	3	3	3	3	3	3	3	3	3	3	3	2	3	3	3	3	2	3
GSM505389	2	2	2	2	2	2	2	2	2	2	2	2	2	2	2	2	2	2	2	2	2	2	2	2	2
GSM505391	2	2	2	2	1	2	2	2	2	1	2	2	1	2	2	1	2	1	2	2	2	2	2	2	1
GSM505393	1	2	1	1	1	1	1	1	1	2	1	1	1	2	1	1	2	2	2	1	2	1	2	2	2
GSM505395	2	2	2	2	2	2	2	2	2	2	2	2	2	2	2	2	2	2	2	2	2	2	2	2	2
GSM505399	1	2	4	4	1	1	1	1	1	1	2	2	1	1	1	1	2	1	2	4	2	1	2	1	1
GSM505401	3	3	3	3	3	3	2	3	3	2	3	3	2	2	2	3	2	3	2	3	3	2	2	2	3
GSM505403	1	1	1	1	1	1	1	1	1	1	1	1	1	1	1	1	1	1	1	1	1	1	1	1	1
GSM505405	2	2	2	2	1	1	2	2	2	2	4	1	1	2	2	1	2	2	2	2	1	2	2	2	2
GSM505407	2	2	2	2	1	1	1	1	1	2	2	2	2	2	1	2	1	2	2	2	2	1	2	2	2
GSM505409	2	2	2	2	2	2	2	2	2	2	2	2	2	2	2	2	2	2	2	2	2	2	2	2	2
GSM505413	5	5	5	5	5	5	5	5	5	3	4	5	5	5	1	5	5	4	3	5	4	5	5	4	5
GSM505427	2	2	2	2	2	2	2	2	2	2	2	2	2	2	2	2	2	2	2	2	1	2	2	3	2
GSM505428	5	5	5	5	5	5	5	5	5	5	5	5	5	5	5	5	1	5	5	5	5	5	5	4	5
GSM505429	1	1	1	1	1	1	1	1	1	1	1	1	1	1	1	1	2	1	1	1	1	1	1	1	1
GSM505430	2	2	2	2	2	2	2	2	2	2	1	2	1	2	2	2	2	1	2	2	1	2	2	2	2
GSM505431	2	2	2	2	2	2	2	2	2	2	2	2	2	2	2	2	2	2	2	2	2	2	2	2	2
GSM505432	1	4	4	4	1	1	1	1	1	1	1	1	1	1	1	1	3	1	1	4	1	1	1	4	1
GSM505433	1	1	1	1	1	1	1	1	1	1	2	1	1	1	1	2	2	4	1	1	1	1	1	1	1
GSM505434	3	3	3	3	3	3	3	3	3	3	3	3	3	3	3	3	2	3	3	3	3	3	3	3	3
GSM505435	INC	4	4	4	5	5	5	5	4	4	4	5	5	2	2	5	1	4	4	4	4	5	1	2	5
GSM505437	3	3	3	3	3	3	3	3	3	2	3	3	2	3	3	3	3	3	2	3	3	3	3	3	3
GSM505438	5	5	5	5	5	5	5	5	5	5	5	5	5	5	5	5	5	4	5	5	5	5	5	4	5
GSM505439	INC	2	4	4	5	5	5	5	5	2	4	5	5	2	2	5	1	4	4	4	4	5	5	2	5
GSM505440	1	1	4	4	1	1	1	1	1	1	1	1	1	1	1	1	3	1	1	4	1	1	1	1	1
GSM505441	2	2	2	2	2	2	2	2	2	2	2	2	2	2	2	2	2	2	2	2	1	2	2	2	2
GSM505442	2	2	2	2	2	2	2	2	2	2	2	2	2	2	2	2	2	2	2	2	2	2	2	2	2
GSM505443	1	1	4	4	1	1	1	1	1	1	1	1	1	1	1	1	1	4	1	4	1	1	1	1	1
GSM505444	2	2	2	2	2	2	2	2	2	2	1	1	2	2	2	2	2	1	2	2	1	2	2	2	2
GSM505445	3	3	3	3	3	3	3	3	3	3	3	3	3	4	3	3	3	3	3	3	3	3	3	3	3
GSM505446	1	1	1	1	1	1	1	1	1	1	2	1	1	1	1	1	2	4	1	1	1	1	1	1	1
GSM505447	3	3	3	3	3	3	3	3	3	2	1	3	3	3	3	3	3	3	2	3	3	3	3	2	3
GSM505448	1	1	1	1	1	1	1	1	1	1	4	1	1	1	1	1	4	4	4	1	4	1	1	1	1
GSM505449	2	2	2	2	1	2	2	2	2	2	2	2	1	2	1	1	2	1	2	2	2	2	2	2	2
GSM505450	2	2	3	3	2	3	2	2	2	2	1	2	2	2	3	2	3	2	2	3	2	2	2	5	2
GSM505451	1	1	1	1	1	1	1	1	1	1	1	1	1	1	1	1	2	1	1	1	2	1	1	1	1
GSM505452	1	1	1	1	1	2	2	2	2	2	1	2	1	2	2	1	1	1	1	1	1	2	1	2	2
GSM505453	2	2	2	2	2	2	2	2	2	2	2	2	2	2	2	2	1	2	1	2	1	2	2	2	2
GSM505454	5	5	5	5	5	5	5	5	5	5	5	5	5	5	5	5	1	5	5	5	5	5	5	2	5
GSM505455	2	2	2	2	2	2	2	2	2	2	2	2	2	2	2	2	2	2	2	2	1	2	2	3	2
GSM505456	2	2	2	2	2	2	2	2	1	2	2	2	2	2	2	2	2	2	2	2	2	2	2	1	2
GSM505457	2	2	2	2	2	2	2	2	2	2	2	2	2	2	2	2	2	2	2	2	1	2	2	2	2
GSM505458	INC	4	4	4	1	1	1	1	4	1	4	1	4	1	1	1	4	4	4	4	4	1	1	4	1
GSM505459	2	2	2	2	3	2	2	2	2	2	2	2	2	2	2	2	2	2	2	2	1	2	2	2	2
GSM505460	5	5	5	5	5	5	5	5	5	5	5	5	5	5	5	5	5	5	5	5	5	5	5	4	5
GSM505461	2	2	2	2	2	2	2	2	2	2	2	2	2	2	2	2	2	2	2	2	1	2	2	3	2
GSM505462	5	5	5	5	5	5	5	5	5	5	5	5	5	5	4	5	5	5	5	5	5	5	5	5	5
GSM505463	2	2	2	2	2	2	2	2	2	2	2	2	2	2	2	2	1	2	2	2	2	2	2	2	2
GSM505464	1	1	1	1	1	1	1	1	1	1	1	1	1	1	1	1	1	1	1	1	1	1	1	4	1
GSM505465	1	1	1	1	1	1	1	1	1	1	4	2	1	2	1	1	1	1	1	1	1	1	1	1	2
GSM505466	5	5	5	5	5	5	5	5	5	1	4	5	5	5	2	5	1	5	2	5	4	5	5	5	5
GSM505467	5	5	5	5	5	5	5	5	5	2	4	5	5	5	5	5	5	4	5	5	4	5	5	4	5
GSM505468	2	2	2	2	3	3	2	2	2	2	2	2	1	2	2	2	5	1	2	2	2	2	2	2	2
GSM505469	1	2	1	1	1	1	1	1	1	2	1	1	1	1	1	1	2	4	2	1	1	1	2	1	1
GSM505471	2	2	2	2	2	2	2	2	2	2	2	2	2	2	2	2	2	2	2	2	2	2	2	2	2
GSM505472	1	1	1	1	1	1	1	1	1	1	1	1	1	1	1	1	4	4	1	1	1	1	1	4	1
GSM505473	2	2	2	2	2	2	2	2	2	2	2	2	2	2	2	2	1	2	2	2	2	2	2	2	2
GSM505474	2	2	2	2	2	2	2	2	2	2	2	2	2	2	2	2	2	2	2	2	2	2	2	1	2
GSM505475	5	5	5	5	5	5	5	5	5	5	4	5	5	4	5	5	5	4	2	5	4	5	5	4	5
GSM505476	2	2	2	2	2	2	2	2	2	2	2	2	2	2	2	2	2	2	2	2	2	2	2	2	2
GSM505477	1	2	2	2	1	1	1	1	1	1	4	1	1	2	1	1	2	2	1	2	1	1	1	1	2
GSM505478	4	4	4	4	4	4	4	4	4	4	4	4	1	4	4	4	5	4	2	4	4	4	4	4	4
GSM505479	2	2	2	2	2	2	2	2	2	2	2	2	2	2	2	2	2	2	2	2	2	2	2	3	2
GSM505480	2	2	2	2	2	2	2	2	2	2	2	2	2	2	2	2	2	2	2	2	2	2	2	2	2
GSM505481	2	2	2	2	2	2	2	2	2	1	2	2	1	1	2	2	2	1	2	2	2	2	2	2	2
GSM505482	1	2	4	4	1	1	1	1	1	1	2	1	1	1	1	1	2	1	1	4	2	1	1	1	1
GSM505483	2	2	2	2	2	2	2	2	2	2	2	2	2	2	2	1	2	2	2	2	1	2	2	2	2
GSM505484	1	2	1	1	1	1	1	1	1	1	1	1	1	1	1	1	2	1	1	1	1	1	1	1	2
GSM505485	2	2	2	2	2	2	2	2	2	1	2	2	2	2	2	2	2	2	2	2	2	2	2	2	2
GSM505486	2	2	2	2	2	2	2	2	2	2	2	2	1	2	2	2	2	2	2	2	2	2	2	2	2
GSM505487	3	3	3	3	3	3	3	3	3	2	1	3	3	2	3	3	3	4	1	3	1	3	3	2	3
GSM505488	1	1	1	1	1	1	1	1	1	1	1	1	1	2	1	1	1	1	1	1	1	1	1	2	2
GSM505490	5	4	5	5	5	5	5	5	5	2	4	5	5	5	3	5	5	3	4	5	4	5	5	5	5
GSM505503	5	5	5	5	5	5	5	5	5	2	5	5	5	5	5	5	5	5	5	5	5	5	5	5	5
GSM505504	5	5	5	5	5	5	5	5	5	5	3	3	5	4	3	3	3	3	3	5	3	5	5	4	3
GSM505505	3	3	3	3	3	3	3	3	3	3	3	3	3	3	3	3	2	3	3	3	3	3	3	2	3
GSM505506	1	1	1	1	1	1	1	1	1	1	1	1	1	1	1	1	2	1	2	1	2	1	1	1	2
GSM505507	1	4	4	4	1	1	1	1	1	1	4	1	1	1	1	1	4	4	1	4	4	1	1	1	1
GSM505508	1	4	4	4	4	4	1	1	1	1	1	1	1	1	1	1	5	4	1	4	1	1	1	1	4
GSM505509	1	1	1	1	1	1	1	1	1	1	1	1	1	1	1	1	1	1	1	1	1	1	1	1	1
GSM505510	2	1	2	2	2	2	2	2	2	2	2	2	2	2	2	2	5	2	2	2	1	2	1	2	2
GSM505511	3	3	3	3	3	3	2	3	3	2	3	3	2	2	3	3	2	3	2	3	3	2	3	2	3
GSM505512	1	1	1	1	1	1	1	1	1	1	1	1	1	1	1	1	1	1	1	1	1	1	1	1	1
GSM505513	5	5	5	5	5	5	5	5	5	5	5	5	5	5	5	5	5	5	5	5	5	5	5	5	5
GSM505514	5	5	5	5	5	5	5	5	5	5	3	5	5	5	5	5	5	3	5	5	3	5	5	1	5
GSM505515	1	1	1	1	1	1	1	1	1	1	1	1	1	1	1	1	1	1	1	1	1	1	1	1	1
GSM505516	5	5	5	5	5	5	5	5	5	2	5	5	5	5	5	5	5	3	5	5	5	5	5	3	5
GSM505517	4	4	4	4	4	4	4	4	4	1	4	1	4	4	1	1	1	4	4	4	4	4	1	1	1
GSM505518	INC	5	5	5	5	2	2	5	3	2	2	2	2	5	5	2	5	4	5	5	3	2	3	4	2
GSM505519	2	2	2	2	1	2	2	2	2	2	1	1	1	2	2	1	2	2	2	2	1	2	2	2	2
GSM505520	1	1	1	1	1	1	1	1	1	1	1	1	1	1	1	1	1	4	1	1	1	1	1	1	1
GSM505521	3	3	3	3	3	3	3	3	3	3	3	3	3	3	3	3	3	3	3	3	3	3	3	4	3
GSM505522	2	2	2	2	2	2	2	2	2	1	2	1	2	2	2	2	2	2	2	2	1	2	2	2	2
GSM505523	1	1	1	1	1	1	1	1	1	2	1	1	1	1	1	1	1	4	1	1	1	1	1	1	1
GSM505524	3	3	3	3	3	3	3	3	3	2	3	3	1	2	3	3	3	3	2	3	3	3	3	2	3
GSM505525	2	1	4	4	2	2	2	2	2	1	1	2	2	2	2	1	1	2	1	4	1	2	2	3	2
GSM505526	3	5	3	3	3	3	5	3	5	5	3	3	5	2	3	5	3	3	2	3	3	5	5	5	3
GSM505527	5	5	5	5	5	5	5	5	5	5	3	3	5	4	3	5	3	4	2	5	3	5	4	4	3
GSM505528	5	5	5	5	5	5	5	5	5	1	4	5	5	5	4	5	5	5	5	5	4	5	5	4	5
GSM505529	1	1	1	1	1	1	1	1	1	1	1	1	1	1	1	1	1	1	1	1	1	1	1	1	1
GSM505530	1	1	1	1	1	1	1	1	1	1	1	1	1	1	1	1	1	1	1	1	1	1	1	1	1
GSM505531	3	3	3	3	3	3	2	3	3	3	4	3	3	2	2	3	1	3	4	3	4	2	3	1	5
GSM505532	2	2	2	2	1	1	1	1	1	1	2	2	1	2	1	2	2	2	1	2	1	1	2	2	2
GSM505533	4	4	4	4	5	4	4	4	5	1	4	4	3	4	4	5	1	4	4	4	4	4	4	4	5
GSM505534	5	5	5	5	5	5	5	5	5	2	3	5	5	5	2	5	1	3	2	5	3	5	5	3	3
GSM505535	5	5	5	5	5	5	5	5	5	5	5	5	5	5	4	5	5	5	5	5	5	5	5	1	5
GSM505536	4	4	4	4	1	4	4	4	1	1	4	4	1	4	1	4	4	4	4	4	4	4	1	4	1
GSM505537	4	4	4	4	4	4	4	4	4	4	4	4	1	4	4	1	3	4	4	4	4	4	1	1	4
GSM505538	1	1	1	1	1	1	1	1	1	1	1	1	1	1	1	1	1	1	2	1	2	1	1	1	1
GSM505539	1	1	1	1	1	1	1	1	1	1	1	1	1	1	1	1	1	1	1	1	1	1	1	2	1
GSM505540	5	5	5	5	5	5	5	5	5	5	4	5	5	5	5	5	1	5	2	5	4	5	5	1	5
GSM505541	5	5	5	5	5	5	5	5	5	5	5	5	5	5	5	5	5	4	5	5	5	5	5	4	5
GSM505542	2	2	2	2	2	2	2	2	2	2	2	2	2	2	2	2	2	2	2	2	1	2	2	3	2
GSM505543	5	5	5	5	5	5	5	5	5	5	5	5	5	5	5	5	5	5	5	5	5	5	5	1	5
GSM505544	1	1	1	1	1	1	1	1	1	1	1	1	1	1	1	1	2	1	1	1	1	1	1	1	1
GSM505545	5	5	5	5	5	5	5	5	5	2	5	5	5	5	3	5	5	5	5	5	5	5	5	4	5
GSM505546	3	3	3	3	3	1	3	3	3	3	1	3	3	2	3	1	2	3	1	3	3	3	1	3	1
GSM505547	2	2	2	2	2	2	2	2	2	2	2	2	2	2	2	2	2	2	2	2	2	2	2	2	2
GSM505548	INC	4	4	4	5	4	5	5	5	1	4	4	5	5	5	5	5	4	4	4	4	5	5	4	5
GSM505549	1	4	4	4	1	1	1	1	4	1	4	1	1	1	1	1	1	4	4	4	4	1	1	4	1
GSM505550	1	1	1	1	1	1	1	1	1	1	1	1	1	1	1	1	1	1	1	1	1	1	1	1	1
GSM505551	1	1	1	1	1	1	1	1	1	1	1	1	1	1	1	1	1	1	1	1	1	1	1	2	1
GSM505552	5	5	5	5	5	5	5	5	5	2	4	5	5	5	2	5	5	4	5	5	4	5	5	4	5
GSM505553	5	5	5	5	5	5	5	5	5	2	5	5	5	4	2	5	5	5	5	5	5	5	5	4	5
GSM505554	5	5	5	5	5	5	5	5	5	2	3	5	3	5	3	5	5	3	5	5	3	5	3	2	5
GSM505555	5	5	5	5	5	5	5	5	5	2	4	5	5	2	2	5	5	5	2	5	4	5	5	4	5
GSM505556	2	2	2	2	2	2	2	2	1	2	1	2	2	2	2	1	2	2	2	2	1	2	2	2	1
GSM505557	1	1	1	1	1	1	1	1	1	2	1	2	2	2	1	1	2	2	1	1	1	1	1	1	1
GSM505558	INC	4	3	3	5	5	5	5	1	1	4	5	5	4	4	5	5	5	2	3	4	5	5	4	4
GSM505559	2	2	2	2	2	2	2	2	2	1	2	2	2	2	2	2	2	2	2	2	1	2	2	2	2
GSM505560	2	2	2	2	2	2	2	2	2	2	2	2	2	2	2	2	2	2	2	2	2	2	2	2	2
GSM505561	5	5	5	5	5	5	5	5	5	5	5	5	5	5	5	5	5	5	5	5	5	5	5	5	5
GSM505562	5	5	5	5	5	5	5	5	5	5	5	5	5	5	5	5	5	5	5	5	5	5	5	2	5
GSM505563	5	5	5	5	5	5	5	5	5	2	4	5	5	4	4	5	5	5	5	5	4	5	5	4	5
GSM505564	5	5	5	5	5	5	5	5	5	5	5	5	5	5	3	5	5	5	5	5	5	5	5	1	5
GSM505565	2	1	2	2	1	1	2	2	2	2	2	2	2	2	2	2	2	2	1	2	1	2	2	2	2
GSM505566	5	5	5	5	5	5	5	5	5	5	5	5	5	5	5	5	5	5	5	5	5	5	5	4	5
GSM505567	2	1	2	2	2	2	2	2	2	2	2	2	2	2	2	1	2	2	2	2	2	2	1	2	2
GSM505568	2	2	2	2	2	3	2	2	2	1	2	2	2	2	2	1	2	4	2	2	1	2	2	2	2
GSM505569	1	4	4	4	1	1	1	1	4	1	1	1	1	1	1	1	1	1	1	4	1	1	1	1	1
GSM505570	3	3	3	3	3	3	3	3	5	2	3	3	5	2	3	3	3	3	2	3	3	3	3	2	3
GSM505571	2	2	2	2	2	2	2	2	2	2	2	2	2	2	2	2	2	2	2	2	2	2	2	2	2
GSM505572	INC	4	4	4	5	5	5	5	5	3	4	4	5	5	1	5	5	4	5	4	4	5	1	1	5
GSM505573	2	2	2	2	2	2	2	2	2	2	2	2	2	2	2	2	2	2	2	2	2	2	2	1	2
GSM505574	5	5	5	5	5	5	5	5	5	5	5	5	5	4	4	5	5	3	5	5	5	5	5	5	5
GSM505575	5	5	5	5	5	5	5	5	5	5	5	5	5	5	2	5	5	5	5	5	5	5	5	4	5
GSM505576	1	1	1	1	1	1	1	1	1	2	1	1	1	1	1	1	2	1	1	1	2	1	1	1	1
GSM505577	2	2	2	2	2	2	2	2	2	2	2	2	2	2	2	2	2	2	2	2	2	2	2	2	2
GSM505578	1	1	1	1	1	1	1	1	1	1	1	1	1	1	1	1	1	1	1	1	1	1	1	1	1
GSM505579	2	1	2	2	1	1	1	2	1	2	2	2	2	2	2	1	2	2	2	2	2	1	2	2	2
GSM505580	5	5	4	4	5	5	5	5	5	2	4	5	5	5	4	5	5	4	2	4	4	5	5	4	5
GSM505581	1	1	1	1	1	1	1	1	1	1	1	1	1	1	1	1	1	1	1	1	1	1	1	2	1
GSM505582	2	2	2	2	2	2	2	2	2	2	2	2	2	2	2	2	2	2	2	2	1	2	2	2	2
GSM505583	5	5	5	5	5	5	5	5	5	5	5	5	5	5	5	5	5	5	5	5	5	5	5	5	5
GSM505584	5	5	5	5	5	5	5	5	5	1	5	5	5	5	5	5	5	5	5	5	5	5	5	1	5
GSM505585	2	2	2	2	2	2	2	2	2	1	2	2	2	2	2	2	2	2	1	2	1	2	1	2	2
GSM505586	INC	4	4	4	3	4	4	3	4	4	1	3	3	1	3	4	3	3	4	4	3	4	1	1	3
GSM505587	1	1	1	1	1	1	1	1	1	1	1	1	1	1	1	1	1	1	1	1	1	1	1	4	1
GSM505588	5	5	5	5	5	5	5	5	5	5	4	5	5	5	4	5	5	5	2	5	4	5	5	5	5
GSM505589	1	1	1	1	1	1	1	1	1	1	1	1	1	1	1	1	1	1	1	1	1	1	1	4	1
GSM505590	2	2	2	2	1	2	2	2	2	2	2	2	1	2	1	1	2	2	2	2	1	2	2	2	2
GSM505591	2	2	2	2	2	2	2	2	2	2	2	2	2	2	2	2	2	2	2	2	2	2	2	2	2
GSM505592	5	5	5	5	5	5	5	5	5	5	3	5	5	5	5	5	5	3	5	5	3	5	5	5	5
GSM505593	2	2	2	2	1	1	2	2	2	2	2	2	1	2	2	1	2	2	2	2	1	2	2	2	2
GSM505594	2	4	2	2	2	2	2	2	2	2	2	2	2	2	2	1	1	1	2	2	2	2	1	2	2
GSM505595	1	1	1	1	1	1	1	1	1	1	1	1	1	1	1	1	1	1	1	1	1	1	1	1	1
GSM505596	2	2	2	2	2	2	2	2	2	2	2	2	2	2	2	2	2	2	2	2	2	2	2	2	2
GSM505597	2	1	2	2	2	1	1	2	1	1	2	2	2	2	2	1	2	2	2	2	1	1	2	2	2
GSM505598	1	1	1	1	1	1	1	1	1	1	1	1	1	1	1	1	3	1	1	1	1	1	1	1	1
GSM505599	1	1	1	1	1	1	1	1	2	1	2	1	1	2	1	1	2	2	1	1	1	1	1	1	1
GSM505600	1	1	1	1	1	1	1	1	1	1	3	1	1	1	1	1	2	1	1	1	1	1	1	1	1
GSM505601	1	1	1	1	1	1	1	1	2	1	2	2	2	2	1	1	2	2	1	1	1	1	1	1	2
GSM505602	2	2	2	2	2	2	2	2	2	2	2	2	2	2	2	2	2	2	2	2	2	2	2	1	2
GSM505603	1	1	1	1	1	1	1	1	1	1	2	2	1	1	1	1	1	1	1	1	1	1	1	1	2
GSM505604	2	2	2	2	2	2	2	2	2	2	2	2	2	2	2	2	2	2	2	2	1	2	2	2	2
GSM505605	2	2	2	2	2	2	2	2	2	2	2	2	2	2	2	2	2	2	2	2	2	2	2	2	2
GSM512539	4	4	4	4	5	4	4	4	4	1	4	1	1	4	1	4	1	4	4	4	4	4	1	4	1
GSM512540	4	4	4	4	4	4	4	4	4	1	4	4	1	4	1	1	1	4	4	4	4	4	1	4	1
GSM512541	4	4	4	4	1	4	4	4	4	1	4	1	1	4	1	1	3	4	4	4	4	4	1	4	1
GSM512543	4	4	4	4	4	4	4	4	4	1	4	4	4	1	4	4	4	1	4	4	4	4	4	4	4
GSM512544	4	4	4	4	1	4	4	4	4	1	4	1	1	4	1	1	3	1	4	4	4	4	1	4	1
GSM512545	4	4	4	4	1	4	4	4	4	1	4	1	1	1	1	1	4	4	4	4	4	4	1	4	4
GSM512546	4	4	4	4	1	4	4	4	4	4	4	1	1	4	1	1	5	4	4	4	4	4	1	4	4
GSM512547	4	4	4	4	4	4	4	4	4	4	4	4	4	4	4	4	1	4	4	4	4	4	1	4	4
GSM512549	4	4	4	4	1	4	4	4	4	4	4	4	1	4	1	4	4	4	4	4	4	4	4	4	4
GSM512550	4	4	4	4	4	4	4	4	4	1	4	4	4	4	1	4	3	4	4	4	4	4	1	4	1
GSM512551	1	4	4	4	1	1	1	1	4	1	1	1	1	1	1	1	1	1	1	4	1	1	1	1	1
GSM512552	4	4	4	4	4	4	4	4	4	4	4	4	4	4	1	4	4	4	4	4	4	4	4	4	4
GSM512553	4	4	4	4	1	4	4	4	4	4	4	1	1	4	1	1	4	4	4	4	4	4	1	4	4
GSM512554	4	4	4	4	1	4	4	4	4	1	4	4	1	4	4	4	4	4	4	4	4	4	1	4	4
GSM512555	4	4	4	4	1	4	4	4	4	1	4	1	1	4	1	1	3	4	4	4	4	4	1	4	1
GSM512556	4	4	4	4	5	4	4	4	4	1	4	4	5	4	4	4	1	4	4	4	4	4	4	4	5
GSM512557	4	4	4	4	5	4	4	4	4	1	4	1	4	4	1	4	1	4	4	4	4	4	1	4	4
GSM512558	4	4	4	4	4	4	4	4	4	1	4	4	1	1	1	1	3	4	4	4	4	4	4	4	1
GSM512559	4	4	4	4	1	4	4	4	4	1	3	1	2	4	1	1	3	4	2	4	4	4	1	4	4
GSM512560	4	4	4	4	4	4	4	4	4	4	4	4	1	4	4	4	1	4	4	4	4	4	1	4	4
GSM512561	4	4	4	4	4	4	4	4	4	1	4	4	4	4	1	4	4	4	4	4	4	4	4	4	1
GSM512562	4	4	4	4	4	4	4	4	4	4	4	4	4	4	4	4	4	4	4	4	4	4	4	4	4
GSM512563	1	4	4	4	1	1	1	1	4	1	1	1	1	1	1	1	3	1	4	4	1	1	1	4	1
GSM512564	4	4	4	4	4	4	4	4	4	1	4	4	1	1	1	4	1	4	4	4	4	4	1	4	1
GSM512565	1	4	4	4	1	1	1	1	4	1	1	1	1	1	1	1	3	1	1	4	1	1	1	1	1
GSM512566	4	4	4	4	4	4	4	4	4	4	4	4	4	4	1	4	1	4	4	4	4	4	4	4	1
GSM512567	4	4	4	4	4	4	4	4	4	4	4	4	1	4	1	4	3	4	4	4	4	4	4	4	4
GSM512568	4	4	4	4	1	4	4	4	4	1	4	4	1	1	1	4	4	4	4	4	4	4	1	4	4
GSM512569	INC	4	4	4	1	4	4	4	1	1	4	4	1	1	1	1	3	1	1	4	4	4	1	4	1
GSM512570	4	4	4	4	4	4	4	4	4	1	4	4	1	4	4	1	5	4	4	4	4	4	4	4	4
GSM512571	1	4	4	4	1	1	1	1	1	1	1	1	1	1	1	1	1	1	1	4	1	1	1	1	1
GSM512572	4	4	4	4	4	4	4	4	4	1	4	4	1	4	1	4	1	4	4	4	4	4	4	4	1
GSM512573	4	4	4	4	4	4	4	4	4	1	4	4	1	4	1	1	4	4	4	4	4	4	4	4	1
GSM512574	4	4	4	4	4	4	4	4	4	1	4	4	1	4	1	4	3	4	4	4	4	4	4	4	4
GSM512575	4	4	4	4	1	4	4	4	4	1	4	1	1	1	1	4	3	4	4	4	4	4	1	4	1
GSM512576	1	4	4	4	1	1	1	4	4	1	1	1	1	1	1	1	3	1	1	4	1	1	1	1	1
GSM512577	4	4	4	4	4	4	4	4	4	4	4	4	1	4	1	1	4	4	4	4	4	4	1	4	1
GSM512578	4	4	4	4	4	4	4	4	4	4	4	4	4	1	1	4	4	4	4	4	4	4	1	4	4
GSM512579	4	4	4	4	4	4	4	4	4	1	4	1	1	1	1	1	4	4	4	4	4	4	1	4	4
GSM512580	4	4	4	4	4	4	4	4	4	1	4	4	4	1	1	1	4	4	4	4	4	4	1	4	1
GSM65316	1	2	4	4	1	1	1	1	2	1	1	2	1	1	1	1	1	1	2	4	1	1	2	3	2
GSM65317	2	2	2	2	2	2	2	2	2	2	2	2	2	2	2	2	2	2	2	2	1	2	2	2	2
GSM65318	1	1	1	1	1	1	1	1	1	1	1	1	1	1	1	1	1	1	1	1	1	1	1	1	1
GSM65319	1	1	1	1	1	1	1	1	1	1	1	1	1	1	1	1	1	1	1	1	1	1	1	1	1
GSM65320	1	1	1	1	1	1	1	1	1	1	1	1	1	1	1	1	1	4	1	1	1	1	1	1	1
GSM65321	2	2	2	2	2	2	2	2	2	2	2	2	2	2	2	2	2	2	2	2	2	2	2	2	2
GSM65322	2	2	2	2	2	2	2	2	2	2	2	2	2	2	2	2	2	2	2	2	2	2	2	2	2
GSM65323	1	1	1	1	1	1	1	1	1	1	1	1	1	1	1	1	1	1	1	1	1	1	1	4	1
GSM65324	2	2	2	2	1	1	2	2	1	1	1	2	1	2	1	2	2	2	2	2	2	2	2	1	2
GSM65325	2	2	3	3	2	2	2	2	3	2	1	2	2	2	2	2	5	2	2	3	2	2	2	2	2
GSM65326	1	4	4	4	1	1	1	1	1	1	1	1	1	1	1	1	2	1	1	4	1	1	1	1	1
GSM65327	1	2	1	1	1	1	1	1	2	1	2	2	2	2	1	2	2	1	1	1	1	1	1	2	1
GSM65328	2	2	1	1	1	1	2	1	2	2	2	2	2	2	1	2	2	2	2	2	1	2	2	2	2
GSM65329	1	1	1	1	1	1	1	1	1	1	1	1	1	1	1	1	1	1	1	1	1	1	1	1	1
GSM65330	1	2	2	2	1	1	1	1	2	1	1	2	1	2	1	1	2	1	2	2	1	1	1	2	2
GSM65331	1	1	1	1	1	1	1	1	1	1	1	1	1	1	1	1	1	1	1	1	1	1	1	1	1
GSM65332	1	1	1	1	1	1	1	1	1	1	1	1	1	1	1	1	1	1	1	1	1	1	1	1	1
GSM65333	3	3	3	3	3	3	5	3	5	1	3	3	3	3	3	3	3	3	3	3	3	5	3	2	3
GSM65334	1	1	1	1	1	1	1	1	1	1	1	1	1	1	1	1	1	1	1	1	1	1	1	1	1
GSM65335	2	2	2	2	2	2	2	2	2	2	2	2	2	2	2	2	2	2	2	2	1	2	2	2	2
GSM65336	1	1	1	1	1	1	1	1	1	1	1	1	1	1	1	1	1	1	1	1	1	1	1	1	1
GSM65337	2	2	2	2	2	2	2	2	2	2	2	2	2	2	2	2	2	2	2	2	2	2	2	2	2
GSM65338	1	2	2	2	1	2	1	2	1	1	1	2	2	2	1	1	1	1	1	2	1	1	1	2	2
GSM65339	5	5	5	5	5	5	5	5	5	5	5	5	5	5	5	5	5	4	5	5	5	5	5	4	5
GSM65340	1	4	4	4	1	1	1	1	4	1	1	1	1	1	1	1	3	4	4	4	4	1	1	4	1
GSM65341	2	2	2	2	2	2	2	2	2	2	3	2	2	2	1	2	3	2	2	2	1	2	2	2	2
GSM65342	1	1	1	1	1	1	1	1	1	1	1	1	1	1	1	1	3	4	1	1	4	1	1	1	1
GSM65343	1	4	4	4	1	1	1	1	1	1	1	1	1	1	1	1	3	1	2	4	4	1	1	1	1
GSM65344	2	2	2	2	2	2	2	2	2	2	1	2	2	2	2	2	3	2	2	2	2	2	2	2	2
GSM65345	2	2	2	2	1	1	2	2	2	2	1	2	1	2	2	1	1	1	1	2	1	2	1	2	2
GSM65346	1	4	4	4	1	1	1	1	1	1	4	1	1	1	1	1	4	4	4	4	4	1	1	4	1
GSM65347	1	4	4	4	1	1	1	1	1	1	1	1	1	1	1	1	3	1	2	4	1	1	1	1	2
GSM65348	1	2	2	2	1	1	1	1	1	1	1	1	1	1	1	1	1	1	1	2	1	1	1	1	2
GSM65349	1	1	4	4	1	1	1	1	1	1	1	1	1	1	1	1	1	1	1	4	1	1	1	1	1
GSM65350	2	3	3	3	2	2	2	3	2	2	2	2	2	4	2	2	3	4	2	3	1	2	2	1	2
GSM65351	1	2	2	2	1	1	1	1	1	2	1	1	1	1	1	1	2	1	1	2	1	1	1	1	2
GSM65352	2	2	2	2	2	2	2	2	2	2	2	2	2	2	2	2	2	2	2	2	2	2	2	2	2
GSM65353	2	2	1	1	1	2	2	2	2	2	2	2	2	2	2	2	1	1	2	1	1	2	2	2	2
GSM65354	2	2	2	2	2	2	2	2	2	2	2	2	2	1	2	2	3	1	2	2	1	2	1	1	2
GSM65355	4	4	4	4	1	1	1	1	4	1	4	4	1	1	1	4	4	4	4	4	4	1	1	4	1
GSM65356	INC	2	4	4	1	1	1	4	4	1	2	1	1	1	1	1	3	4	2	4	1	1	2	4	1
GSM65357	1	1	4	4	1	1	1	1	2	2	1	1	1	1	1	1	3	4	2	4	4	1	1	1	2
GSM65358	1	1	1	1	1	1	1	1	2	2	1	1	1	2	2	1	1	1	1	1	1	1	1	1	1
GSM65359	2	2	2	2	2	2	2	2	2	2	2	2	1	2	2	2	2	2	2	2	1	2	2	2	2
GSM65360	1	1	2	2	1	1	1	1	1	2	1	2	1	2	2	1	2	2	1	2	1	1	1	1	2
GSM65361	1	1	1	1	1	1	1	1	1	1	1	1	1	1	1	1	3	1	1	1	1	1	1	1	1
GSM65362	1	4	4	4	1	1	1	1	4	1	1	1	1	1	1	1	3	4	4	4	4	1	1	4	1
GSM65363	1	1	4	4	1	1	1	1	1	1	1	1	1	1	1	1	3	1	1	4	1	1	1	1	1
GSM65364	1	2	2	2	1	1	1	1	1	1	1	1	1	1	1	1	3	1	2	2	2	1	1	1	2
GSM65365	1	1	1	1	1	1	1	1	1	1	1	1	1	1	1	1	3	1	1	1	1	1	1	1	1
GSM65366	2	2	2	2	2	2	2	2	2	2	2	2	2	2	2	2	2	2	2	2	2	2	2	1	2
GSM65367	1	3	3	3	1	1	4	1	1	1	1	1	2	1	1	1	3	4	2	3	1	4	1	4	1
GSM65368	1	1	4	4	1	1	1	1	1	1	4	1	1	1	1	1	3	4	1	4	4	1	1	1	1
GSM65369	2	2	2	2	2	2	2	2	2	2	3	2	2	2	2	2	3	4	2	2	1	2	3	2	2
GSM65370	2	2	2	2	2	2	2	2	2	2	2	2	1	2	2	1	3	2	1	2	2	2	2	2	2
GSM65371	2	2	2	2	2	2	2	2	2	2	2	2	2	2	2	2	2	2	2	2	1	2	2	2	2
GSM65372	2	2	2	2	2	2	2	2	2	2	2	2	2	2	2	2	2	2	2	2	1	2	2	2	2
GSM65373	1	1	2	2	1	1	1	2	2	1	1	2	1	1	2	1	2	2	1	2	1	1	2	1	2
GSM65374	2	2	2	2	2	2	2	2	2	2	2	2	2	2	2	2	2	2	2	2	2	2	2	2	2
GSM65375	2	2	2	2	2	2	2	2	2	2	1	2	2	2	2	2	2	2	2	2	1	2	2	1	2
GSM65376	1	2	4	4	1	1	1	1	1	1	2	1	1	1	1	1	3	4	2	4	4	1	1	1	1
GSM65377	2	2	2	2	2	2	2	2	2	2	2	2	2	2	2	2	2	2	2	2	2	2	2	2	2
GSM65378	1	4	4	4	1	1	1	1	1	1	2	1	1	1	1	1	3	4	2	4	1	1	4	1	1
GSM65379	1	1	1	1	1	1	1	1	1	1	1	1	1	1	1	1	1	1	1	1	1	1	1	1	1
GSM65752	5	5	5	5	5	5	5	5	5	5	5	5	5	5	5	5	5	5	5	5	5	5	5	5	5
GSM65753	1	1	1	1	1	1	1	1	1	1	4	1	1	1	1	1	3	1	1	1	4	1	1	1	1
GSM65754	1	4	4	4	1	1	1	1	1	1	1	1	1	1	1	1	3	1	1	4	1	1	1	1	1
GSM65755	1	2	3	3	1	1	1	1	2	1	2	2	1	1	1	2	3	1	1	3	1	1	2	4	1
GSM65756	1	2	2	2	1	1	1	1	2	1	2	1	1	1	1	2	3	1	1	2	1	1	1	2	2
GSM65757	INC	2	3	3	1	2	1	2	2	1	1	1	1	2	2	2	2	1	2	3	2	1	2	1	1
GSM65758	1	1	1	1	1	1	1	1	1	1	1	1	1	1	1	1	1	1	1	1	1	1	1	1	1
GSM65760	2	2	2	2	2	2	2	2	2	2	2	2	2	2	2	2	2	2	2	2	2	2	2	2	2
GSM65761	2	2	2	2	1	2	2	2	2	2	1	2	1	2	2	2	2	2	2	2	1	2	2	2	2
GSM65762	1	1	4	4	1	1	1	1	1	1	1	1	1	1	1	1	1	1	4	4	1	1	1	1	1
GSM65763	1	1	1	1	1	1	1	1	1	1	1	1	1	1	1	1	1	1	1	1	1	1	1	1	1
GSM65764	1	1	1	1	1	1	1	1	1	1	1	1	1	1	1	1	1	1	1	1	1	1	1	1	1
GSM65765	1	1	1	1	1	1	1	1	1	1	1	1	1	1	1	1	2	2	2	1	1	1	1	1	1
GSM65766	1	4	4	4	1	1	1	1	1	1	4	1	1	1	1	1	4	4	4	4	4	1	1	1	1
GSM65767	1	1	1	1	1	1	1	1	1	1	1	1	1	1	1	1	1	1	1	1	1	1	1	1	1
GSM65768	2	2	2	2	2	2	2	2	2	2	3	3	5	2	2	3	2	3	2	2	3	2	2	2	3
GSM65769	1	4	4	4	1	1	1	1	1	1	1	1	1	1	1	4	3	1	1	4	1	1	1	4	1
GSM65770	1	1	4	4	1	1	1	1	1	1	1	1	1	1	1	1	1	1	1	4	1	1	1	1	1
GSM65771	1	1	1	1	1	1	1	1	1	1	1	1	1	1	1	1	3	1	1	1	1	1	1	1	1
GSM65772	INC	4	3	3	1	1	1	1	3	2	4	5	1	1	1	1	3	4	4	3	4	1	4	1	3
GSM65773	1	4	4	4	1	1	1	1	1	1	1	1	1	1	1	1	3	4	4	4	1	1	1	4	1
GSM65774	2	2	2	2	2	2	2	2	2	2	2	2	2	2	2	2	1	2	2	2	2	2	2	2	2
GSM65775	1	1	1	1	1	1	1	1	1	1	1	1	1	1	1	1	3	2	2	1	1	1	1	1	1
GSM65776	1	1	1	1	1	1	1	1	1	1	1	1	1	1	1	1	3	4	4	1	4	1	1	1	1
GSM65779	1	4	4	4	1	1	1	1	1	1	4	1	1	1	1	1	3	4	1	4	4	1	1	1	1
GSM65780	1	1	1	1	1	1	1	1	1	1	1	1	1	1	1	1	3	1	1	1	1	1	1	1	1
GSM65781	1	1	1	1	1	1	1	1	1	1	1	1	1	1	1	1	1	1	1	1	1	1	1	1	1
GSM65782	1	1	4	4	1	1	1	1	1	1	1	1	1	1	1	1	1	1	1	4	1	1	1	1	1
GSM65783	1	1	1	1	1	1	1	1	1	1	4	1	1	1	1	1	1	4	4	1	4	1	1	4	1
GSM65784	1	1	1	1	1	1	1	1	1	2	1	1	1	1	1	1	1	1	1	1	1	1	1	1	1
GSM65785	1	1	1	1	1	1	1	1	1	1	1	1	1	1	1	1	1	1	1	1	1	1	1	1	1
GSM65786	1	2	2	2	1	1	1	1	1	2	1	1	1	2	1	1	2	2	2	2	2	1	1	2	1
GSM65787	1	1	1	1	1	1	1	1	1	1	1	1	1	1	1	1	1	1	1	1	1	1	1	1	1
GSM65788	1	4	4	4	1	1	1	1	1	1	4	4	1	1	1	1	4	4	4	4	4	1	1	4	1
GSM65789	1	1	1	1	1	1	1	1	1	1	1	1	1	1	1	1	3	1	1	1	1	1	1	1	1
GSM65790	1	1	1	1	1	1	1	1	1	1	1	2	1	1	1	1	1	4	2	1	1	1	1	1	1
GSM65791	1	1	1	1	1	1	1	1	1	1	1	1	1	1	1	1	1	1	1	1	1	1	1	1	1
GSM65792	5	5	5	5	5	5	5	5	5	5	5	5	5	5	5	5	5	5	5	5	5	5	5	4	5
GSM65793	1	1	4	4	1	1	1	1	1	1	1	1	1	1	1	1	3	1	1	4	1	1	1	1	1
GSM65794	3	3	3	3	1	1	1	3	4	4	1	3	3	3	3	1	3	4	1	3	3	1	3	5	3
GSM65795	5	5	5	5	5	5	5	5	5	5	5	5	5	5	5	5	5	5	5	5	5	5	5	5	5
GSM65796	1	1	1	1	1	1	1	1	1	1	1	1	1	1	1	1	3	1	1	1	1	1	1	1	1
GSM65797	1	1	1	1	1	1	1	1	1	1	1	1	1	1	1	1	1	1	1	1	1	1	1	1	1
GSM65798	1	1	1	1	1	1	1	1	1	1	1	1	1	1	1	1	1	1	1	1	1	1	1	1	1
GSM65799	1	1	1	1	1	1	1	1	1	1	1	1	1	1	1	1	1	1	1	1	1	1	1	1	1
GSM65800	1	1	1	1	1	1	1	1	1	1	1	1	1	1	1	1	3	1	1	1	1	1	1	1	1
GSM65801	1	1	1	1	1	1	1	1	1	1	1	1	1	1	1	1	1	1	1	1	1	1	1	1	1
GSM65802	5	5	5	5	5	5	5	5	5	5	5	5	5	5	5	5	5	4	5	5	5	5	5	5	3
GSM65803	1	1	4	4	1	1	1	1	1	1	4	1	1	1	1	1	3	4	4	4	4	1	1	4	1
GSM65804	5	5	5	5	5	5	5	5	5	5	4	4	1	4	5	5	5	1	2	5	2	5	5	5	4
GSM65805	5	5	5	5	5	5	5	5	5	5	5	5	5	5	5	5	5	5	5	5	5	5	5	5	5
GSM65806	5	5	5	5	5	5	5	5	5	5	5	5	5	5	5	5	5	5	5	5	5	5	5	4	5
GSM65807	1	4	4	4	1	1	1	1	1	1	1	1	1	1	1	1	4	1	1	4	1	1	1	1	1
GSM65808	1	1	1	1	1	1	1	1	1	1	1	1	1	1	1	1	1	1	1	1	1	1	1	1	1
GSM65810	1	1	1	1	1	1	1	1	1	1	1	1	1	1	1	1	1	1	1	1	1	1	1	1	1
GSM65811	1	4	4	4	1	1	1	1	1	1	1	4	1	1	1	1	3	1	1	4	1	1	1	1	1
GSM65812	1	1	1	1	1	1	1	1	1	1	1	1	1	1	1	1	1	1	1	1	1	1	1	1	1
GSM65813	2	3	3	3	1	2	2	2	2	2	1	2	1	2	2	2	2	1	1	3	1	2	2	1	2
GSM65814	1	1	1	1	1	1	1	1	1	1	1	1	1	1	1	1	3	1	1	1	1	1	1	1	1
GSM65815	1	1	1	1	1	1	1	1	1	1	1	1	1	1	1	1	2	1	1	1	1	1	1	1	1
GSM65816	5	5	5	5	5	5	5	5	5	5	5	5	5	5	5	5	5	5	5	5	5	5	5	5	5
GSM65817	1	1	1	1	1	1	1	1	1	1	1	1	1	1	1	1	1	1	1	1	1	1	1	1	1
GSM65818	2	2	2	2	2	1	2	2	2	2	2	2	2	2	2	2	2	2	2	2	1	2	1	1	2
GSM65819	2	2	3	3	2	2	2	2	2	2	2	2	2	2	2	2	2	2	3	3	3	2	3	1	2
GSM65820	1	1	1	1	1	1	1	1	1	1	1	1	1	1	1	1	2	1	1	1	2	1	1	1	1
GSM65821	1	1	2	2	1	1	1	1	1	1	2	2	1	2	1	2	2	2	2	2	1	1	1	1	2
GSM65822	1	2	2	2	1	1	1	1	1	1	1	2	1	1	1	1	2	2	2	2	2	1	1	1	1
GSM65823	1	1	1	1	1	1	1	1	1	1	1	1	1	1	1	1	1	1	1	1	1	1	1	1	1
GSM65824	1	4	4	4	1	1	4	4	4	1	1	1	1	1	1	1	3	1	1	4	1	4	1	1	1
GSM65825	3	3	3	3	2	3	2	5	3	2	3	3	2	2	2	3	3	3	2	3	3	2	3	3	3
GSM65826	1	1	4	4	1	1	1	1	1	1	1	1	1	1	1	1	3	1	1	4	1	1	1	1	1
GSM65827	1	1	1	1	1	1	1	1	1	2	1	1	1	1	1	1	3	1	1	1	1	1	1	1	1
GSM65828	2	2	2	2	2	2	2	2	2	2	2	2	1	2	2	2	2	2	2	2	2	2	2	2	2
GSM65829	1	2	1	1	1	1	1	1	1	1	1	1	1	1	1	1	2	1	1	1	1	1	1	1	1
GSM65830	1	1	4	4	1	1	1	1	1	1	1	1	1	1	1	1	3	1	1	4	1	1	1	1	1
GSM65831	2	2	2	2	2	2	2	2	2	2	2	2	2	2	2	2	2	2	2	2	2	2	2	2	2
GSM65832	1	1	1	1	1	1	1	1	1	1	1	1	1	1	1	1	1	1	1	1	1	1	1	1	1
GSM65833	1	2	4	4	1	1	1	1	1	1	1	1	1	1	1	1	1	1	1	4	1	1	1	1	1
GSM65834	2	1	1	1	2	2	2	2	2	2	3	2	2	1	2	2	1	1	2	1	1	2	1	1	2
GSM65835	3	3	3	3	1	4	4	3	5	3	3	3	1	3	4	5	3	3	2	3	3	4	4	4	3
GSM65836	1	4	4	4	1	1	1	1	1	1	1	1	1	1	1	1	3	1	1	4	1	1	1	1	1
GSM65837	2	2	2	2	2	2	2	2	2	2	2	2	2	2	2	2	2	2	2	2	2	2	2	2	2
GSM65838	3	3	3	3	3	3	2	3	3	2	3	3	3	2	3	3	3	3	2	3	3	2	3	3	3
GSM65839	3	3	3	3	2	3	3	3	3	2	3	3	5	2	3	3	3	3	2	3	3	3	3	2	3
GSM65840	1	4	4	4	1	1	1	1	1	1	4	4	1	1	1	1	3	4	4	4	4	1	1	4	1
GSM65841	5	5	5	5	5	5	5	5	5	5	5	5	5	5	3	5	5	5	5	5	5	5	5	4	5
GSM65842	5	5	5	5	5	5	5	5	5	2	5	5	5	5	2	5	5	3	5	5	5	5	5	3	5
GSM65843	5	5	5	5	5	5	5	5	5	5	3	5	5	5	5	5	3	3	2	5	3	5	3	4	3
GSM65844	2	2	2	2	2	2	2	2	2	2	2	2	2	2	2	2	2	2	2	2	1	2	2	2	2
GSM65845	5	5	5	5	5	5	5	5	5	2	5	5	5	5	5	5	5	5	5	5	5	5	5	5	5
GSM65846	INC	3	3	3	2	2	3	3	3	2	3	2	2	3	3	2	2	2	2	3	2	3	1	1	2
GSM65847	1	1	1	1	1	1	1	1	1	1	1	1	1	1	1	1	1	1	2	1	1	1	1	1	1
GSM65848	1	1	1	1	1	1	1	1	1	1	1	1	1	1	1	1	3	1	1	1	1	1	1	1	1
GSM65849	1	4	4	4	1	1	1	1	1	1	1	1	1	1	1	1	3	1	1	4	1	1	1	1	1
GSM65850	5	5	5	5	5	5	5	5	5	5	5	5	5	5	5	5	5	4	5	5	5	5	5	4	5
GSM65851	2	2	2	2	2	2	2	2	2	2	2	2	2	2	2	2	2	2	2	2	1	2	2	2	2
GSM65852	5	5	5	5	5	5	5	5	5	2	5	5	5	5	5	5	5	5	5	5	5	5	5	3	5
GSM65853	1	1	1	1	1	1	1	1	1	1	1	1	1	1	1	1	1	1	2	1	1	1	1	1	1
GSM65854	1	1	1	1	1	1	1	1	1	1	1	1	1	1	1	1	3	1	1	1	1	1	1	1	1
GSM65855	1	1	1	1	1	1	1	1	1	1	1	1	1	1	1	1	3	1	1	1	1	1	1	1	1
GSM65856	2	2	2	2	2	2	2	2	2	2	2	2	1	2	2	2	2	2	1	2	1	2	2	1	2
GSM65857	2	2	2	2	2	2	2	2	2	2	2	2	2	2	2	2	2	2	2	2	2	2	2	1	2
GSM65858	1	1	1	1	1	1	1	1	1	1	1	1	1	1	1	1	1	1	1	1	1	1	1	1	1
GSM65859	1	1	1	1	1	1	1	1	1	1	1	1	1	1	1	1	1	1	1	1	1	1	1	1	1
GSM65860	1	1	1	1	1	1	1	1	1	1	1	1	1	1	1	1	1	1	1	1	1	1	1	1	1
GSM65861	INC	3	5	5	5	4	5	5	5	3	4	5	4	4	5	4	3	4	1	5	4	5	4	2	4
GSM65862	1	1	1	1	1	1	1	1	1	1	1	1	1	1	1	1	1	1	1	1	1	1	1	1	1
GSM65863	5	5	5	5	5	5	5	5	5	5	5	5	5	5	5	5	5	4	5	5	5	5	5	4	5
GSM65864	1	1	4	4	1	1	1	1	1	1	1	1	1	1	1	1	3	1	1	4	1	1	1	1	1
GSM65865	4	4	4	4	4	4	4	4	4	4	4	4	4	4	4	4	4	4	4	4	4	4	4	4	1
GSM65866	3	3	3	3	3	3	2	3	3	2	3	3	3	3	3	3	2	3	3	3	3	2	3	2	3
GSM65867	1	1	2	2	1	1	1	1	1	1	1	1	1	1	1	2	1	1	1	2	1	1	1	1	1
GSM65868	2	2	2	2	2	2	2	2	2	2	2	2	2	2	2	2	2	2	2	2	2	2	2	2	2
GSM65869	1	2	1	1	1	1	1	1	2	1	1	1	1	1	1	1	2	1	1	1	1	1	1	2	1
GSM65870	2	2	2	2	1	1	2	2	2	2	2	2	1	1	2	1	5	1	1	2	1	2	2	1	1
GSM65871	1	1	4	4	1	1	1	1	1	1	1	1	1	1	1	1	3	1	1	4	1	1	1	1	1
GSM65872	1	1	4	4	1	1	1	1	1	1	1	1	1	1	1	1	3	1	2	4	1	1	1	1	2
GSM65873	1	1	1	1	1	1	1	1	2	1	1	1	1	1	1	1	1	2	1	1	1	1	1	1	2
GSM65874	4	4	4	4	1	4	4	4	4	1	4	1	4	1	1	1	3	1	4	4	4	4	1	4	4
GSM65875	1	1	1	1	1	1	1	1	1	1	1	1	1	1	1	1	1	1	1	1	1	1	1	2	1
GSM65876	INC	4	4	4	5	3	2	5	4	1	4	5	5	5	2	5	1	4	4	4	4	2	5	2	5
GSM65877	1	1	4	4	1	1	1	1	1	1	1	1	1	1	1	1	3	1	1	4	1	1	1	1	1
GSM65878	4	4	4	4	5	4	5	5	5	4	4	5	5	5	5	4	5	4	4	4	4	5	4	4	5
GSM65879	4	4	4	4	5	4	4	4	4	1	4	5	5	4	1	4	5	4	4	4	4	4	4	4	5
GSM65880	1	1	4	4	1	1	1	1	1	1	1	1	1	1	1	1	3	1	1	4	1	1	1	1	1

## Sheet: Label METABRIC Discovery PAM50
	Luminal A	Luminal B	Her2-enriched	Normal-like	Basal
	X1	X2	X3	X4	X5
MB-0362	19	5	0	0	0
MB-0346	0	1	22	1	0
MB-0386	17	7	0	0	0
MB-0574	18	6	0	0	0
MB-0185	0	23	1	0	0
MB-0503	24	0	0	0	0
MB-0641	7	0	0	17	0
MB-0201	0	0	18	1	5
MB-0218	0	24	0	0	0
MB-0316	0	0	0	0	24
MB-0189	8	1	0	15	0
MB-0891	24	0	0	0	0
MB-0658	0	0	0	0	24
MB-0899	24	0	0	0	0
MB-0605	24	0	0	0	0
MB-0258	24	0	0	0	0
MB-0506	1	1	19	3	0
MB-0420	0	0	0	0	24
MB-0223	24	0	0	0	0
MB-0445	24	0	0	0	0
MB-0199	24	0	0	0	0
MB-0517	24	0	0	0	0
MB-0155	11	0	0	13	0
MB-0428	22	2	0	0	0
MB-0117	24	0	0	0	0
MB-0906	1	0	6	13	4
MB-0249	1	0	10	8	5
MB-0660	1	0	19	1	3
MB-0497	24	0	0	0	0
MB-0434	2	20	1	0	1
MB-0143	19	5	0	0	0
MB-0513	22	2	0	0	0
MB-0541	21	2	1	0	0
MB-0653	0	2	22	0	0
MB-0455	0	24	0	0	0
MB-0540	4	0	2	10	8
MB-0384	19	5	0	0	0
MB-0637	0	23	0	0	1
MB-0157	0	1	0	0	23
MB-0443	16	8	0	0	0
MB-0584	2	22	0	0	0
MB-0292	0	1	21	0	2
MB-0322	24	0	0	0	0
MB-0501	24	0	0	0	0
MB-0401	0	0	0	0	24
MB-0140	21	3	0	0	0
MB-0606	8	16	0	0	0
MB-0666	5	19	0	0	0
MB-0598	8	13	2	1	0
MB-0453	0	2	17	0	5
MB-0138	24	0	0	0	0
MB-0579	14	10	0	0	0
MB-0405	0	24	0	0	0
MB-0471	18	6	0	0	0
MB-0347	0	7	15	0	2
MB-0619	18	0	0	6	0
MB-0171	3	0	0	21	0
MB-0310	24	0	0	0	0
MB-0621	12	0	0	12	0
MB-0614	16	7	0	1	0
MB-0372	0	0	0	0	24
MB-0374	8	14	0	1	1
MB-0382	20	0	0	4	0
MB-0327	24	0	0	0	0
MB-0066	2	22	0	0	0
MB-0144	18	6	0	0	0
MB-0596	24	0	0	0	0
MB-0164	0	1	1	0	22
MB-0215	4	20	0	0	0
MB-0146	4	20	0	0	0
MB-0229	24	0	0	0	0
MB-0505	20	0	0	4	0
MB-0102	0	24	0	0	0
MB-0569	1	23	0	0	0
MB-0516	0	0	0	0	24
MB-0272	0	24	0	0	0
MB-0585	14	10	0	0	0
MB-0494	0	0	12	0	12
MB-0306	23	0	0	1	0
MB-0463	24	0	0	0	0
MB-0198	0	23	1	0	0
MB-0203	20	4	0	0	0
MB-0607	22	1	0	1	0
MB-0631	23	1	0	0	0
MB-0363	0	24	0	0	0
MB-0427	8	16	0	0	0
MB-0519	9	0	0	15	0
MB-0371	4	20	0	0	0
MB-0380	0	24	0	0	0
MB-0221	0	0	23	0	1
MB-0348	24	0	0	0	0
MB-0261	19	5	0	0	0
MB-0576	3	21	0	0	0
MB-0385	11	12	1	0	0
MB-0659	3	0	0	17	4
MB-0270	0	24	0	0	0
MB-0379	24	0	0	0	0
MB-0432	1	0	2	12	9
MB-0527	24	0	0	0	0
MB-0624	17	0	0	7	0
MB-0273	24	0	0	0	0
MB-0050	11	0	0	13	0
MB-0460	14	0	0	10	0
MB-0654	24	0	0	0	0
MB-0454	23	1	0	0	0
MB-0392	8	0	1	15	0
MB-0336	0	24	0	0	0
MB-0467	0	1	23	0	0
MB-0349	10	14	0	0	0
MB-0378	0	1	23	0	0
MB-0176	19	0	0	5	0
MB-0429	14	10	0	0	0
MB-0397	23	0	0	1	0
MB-0571	9	15	0	0	0
MB-0426	15	0	0	9	0
MB-0135	0	24	0	0	0
MB-0112	24	0	0	0	0
MB-0352	2	0	16	6	0
MB-0644	21	0	0	3	0
MB-0601	0	24	0	0	0
MB-0568	24	0	0	0	0
MB-0328	0	24	0	0	0
MB-0325	0	24	0	0	0
MB-0358	16	3	3	2	0
MB-0413	24	0	0	0	0
MB-0158	3	0	14	0	7
MB-0636	15	5	1	3	0
MB-0145	20	0	0	4	0
MB-0195	0	24	0	0	0
MB-0422	24	0	0	0	0
MB-0483	6	18	0	0	0
MB-0317	24	0	0	0	0
MB-0486	22	1	0	1	0
MB-0139	17	0	0	7	0
MB-0257	23	1	0	0	0
MB-0345	24	0	0	0	0
MB-0375	4	1	1	12	6
MB-0419	24	0	0	0	0
MB-0480	24	0	0	0	0
MB-0311	0	22	2	0	0
MB-0324	4	20	0	0	0
MB-0368	0	24	0	0	0
MB-0389	0	24	0	0	0
MB-0248	21	3	0	0	0
MB-0035	4	7	13	0	0
MB-0667	0	24	0	0	0
MB-0423	24	0	0	0	0
MB-0904	24	0	0	0	0
MB-0119	2	22	0	0	0
MB-0650	23	1	0	0	0
MB-0204	24	0	0	0	0
MB-0184	21	3	0	0	0
MB-0600	7	16	1	0	0
MB-0400	1	0	0	0	23
MB-0511	24	0	0	0	0
MB-0059	15	9	0	0	0
MB-0500	0	0	0	0	24
MB-0150	0	0	0	0	24
MB-0895	5	18	0	1	0
MB-0366	24	0	0	0	0
MB-0173	3	21	0	0	0
MB-0131	23	1	0	0	0
MB-0206	1	0	0	0	23
MB-0315	24	0	0	0	0
MB-0361	1	2	21	0	0
MB-0545	6	1	1	16	0
MB-0370	1	23	0	0	0
MB-0642	24	0	0	0	0
MB-0431	24	0	0	0	0
MB-0181	24	0	0	0	0
MB-0603	24	0	0	0	0
MB-0295	24	0	0	0	0
MB-0618	20	4	0	0	0
MB-0496	8	0	0	16	0
MB-0411	22	0	0	2	0
MB-0285	9	0	0	15	0
MB-0360	0	24	0	0	0
MB-0359	24	0	0	0	0
MB-0344	12	0	0	12	0
MB-0583	24	0	0	0	0
MB-0202	11	8	0	3	2
MB-0485	20	1	0	3	0
MB-0609	24	0	0	0	0
MB-0538	22	0	0	2	0
MB-0197	2	21	1	0	0
MB-0410	22	0	0	2	0
MB-0528	22	0	1	1	0
MB-0165	13	3	3	5	0
MB-0152	0	0	24	0	0
MB-0546	22	0	0	2	0
MB-0148	0	0	24	0	0
MB-0594	9	15	0	0	0
MB-0521	18	0	0	6	0
MB-0532	0	15	8	0	1
MB-0536	1	22	1	0	0
MB-0319	1	23	0	0	0
MB-0491	21	1	0	2	0
MB-0404	13	11	0	0	0
MB-0243	13	11	0	0	0
MB-0580	22	1	0	1	0
MB-0312	0	24	0	0	0
MB-0060	0	17	5	0	2
MB-0635	1	0	3	12	8
MB-0649	23	0	0	1	0
MB-0643	0	0	23	0	1
MB-0581	0	0	16	2	6
MB-0383	2	22	0	0	0
MB-0142	24	0	0	0	0
MB-0320	21	0	0	3	0
MB-0207	23	0	0	1	0
MB-0167	0	24	0	0	0
MB-0591	4	20	0	0	0
MB-0613	1	0	12	0	11
MB-0313	0	24	0	0	0
MB-0599	19	0	0	5	0
MB-0286	20	0	0	4	0
MB-0575	23	0	0	1	0
MB-0549	2	22	0	0	0
MB-0214	0	0	0	0	24
MB-0589	8	16	0	0	0
MB-0406	1	23	0	0	0
MB-0452	1	23	0	0	0
MB-0524	5	0	0	18	1
MB-0880	24	0	0	0	0
MB-0573	24	0	0	0	0
MB-0664	0	0	0	1	23
MB-0446	0	0	0	0	24
MB-0008	0	24	0	0	0
MB-0656	0	0	4	0	20
MB-0154	20	0	0	4	0
MB-0597	5	0	0	19	0
MB-0550	0	23	1	0	0
MB-0616	3	21	0	0	0
MB-0448	20	4	0	0	0
MB-0412	0	24	0	0	0
MB-0122	24	0	0	0	0
MB-0425	24	0	0	0	0
MB-0314	3	1	20	0	0
MB-0356	22	2	0	0	0
MB-0440	0	24	0	0	0
MB-0398	3	21	0	0	0
MB-0438	1	2	21	0	0
MB-0449	24	0	0	0	0
MB-0162	24	0	0	0	0
MB-0593	3	0	13	4	4
MB-0301	20	4	0	0	0
MB-0628	20	0	0	4	0
MB-0283	0	24	0	0	0
MB-0106	24	0	0	0	0
MB-0341	21	1	0	1	1
MB-0474	0	24	0	0	0
MB-0394	24	0	0	0	0
MB-0373	2	20	1	0	1
MB-0247	24	0	0	0	0
MB-0225	2	22	0	0	0
MB-0424	1	0	0	22	1
MB-0209	3	0	0	19	2
MB-0115	0	0	0	0	24
MB-0136	24	0	0	0	0
MB-0542	15	1	0	8	0
MB-0354	1	1	9	0	13
MB-0151	20	4	0	0	0
MB-0590	0	24	0	0	0
MB-0608	1	0	0	0	23
MB-0657	3	0	0	21	0
MB-0559	22	2	0	0	0
MB-0893	2	0	1	11	10
MB-0514	1	23	0	0	0
MB-0395	2	0	21	0	1
MB-0294	5	0	2	17	0
MB-0439	0	24	0	0	0
MB-0481	0	0	0	0	24
MB-0529	22	2	0	0	0
MB-0224	24	0	0	0	0
MB-0302	24	0	0	0	0
MB-0126	20	4	0	0	0
MB-0220	2	0	1	21	0
MB-0192	11	1	0	12	0
MB-0121	24	0	0	0	0
MB-0239	23	0	1	0	0
MB-0364	24	0	0	0	0
MB-0232	22	2	0	0	0
MB-0884	0	24	0	0	0
MB-0238	0	0	0	1	23
MB-0194	20	0	0	3	1
MB-0882	0	24	0	0	0
MB-0010	0	23	1	0	0
MB-0236	19	5	0	0	0
MB-0377	12	0	0	12	0
MB-0123	6	18	0	0	0
MB-0504	24	0	0	0	0
MB-0564	5	0	14	5	0
MB-0475	11	5	5	2	1
MB-0321	23	1	0	0	0
MB-0482	0	0	11	4	9
MB-0101	23	1	0	0	0
MB-0662	16	0	0	6	2
MB-0291	1	22	0	1	0
MB-0465	6	14	4	0	0
MB-0630	0	23	1	0	0
MB-0036	23	1	0	0	0
MB-0166	24	0	0	0	0
MB-0180	24	0	0	0	0
MB-0525	0	1	3	0	20
MB-0307	9	0	1	14	0
MB-0002	24	0	0	0	0
MB-0408	22	1	0	1	0
MB-0466	22	0	0	2	0
MB-0632	16	0	3	5	0
MB-0120	5	19	0	0	0
MB-0507	24	0	0	0	0
MB-0287	5	18	0	1	0
MB-0869	0	0	0	0	24
MB-4633	24	0	0	0	0
MB-4627	24	0	0	0	0
MB-4004	14	10	0	0	0
MB-4708	24	0	0	0	0
MB-4618	16	8	0	0	0
MB-4641	24	0	0	0	0
MB-4622	0	0	0	0	24
MB-4634	23	1	0	0	0
MB-4688	0	24	0	0	0
MB-4665	23	1	0	0	0
MB-4666	22	0	1	1	0
MB-4640	0	0	24	0	0
MB-4691	24	0	0	0	0
MB-4671	7	17	0	0	0
MB-4667	5	0	16	3	0
MB-4721	24	0	0	0	0
MB-4723	2	22	0	0	0
MB-4718	9	0	0	15	0
MB-4716	22	2	0	0	0
MB-4729	14	4	6	0	0
MB-4717	0	0	0	0	24
MB-4724	0	0	24	0	0
MB-4770	0	0	20	0	4
MB-4752	22	2	0	0	0
MB-4762	23	0	1	0	0
MB-5169	10	14	0	0	0
MB-4796	0	24	0	0	0
MB-4790	23	0	0	1	0
MB-4797	16	8	0	0	0
MB-4800	24	0	0	0	0
MB-5541	17	0	0	7	0
MB-5549	0	0	23	0	1
MB-5519	3	21	0	0	0
MB-5495	24	0	0	0	0
MB-4832	24	0	0	0	0
MB-4745	0	0	15	0	9
MB-4825	21	3	0	0	0
MB-4814	6	0	0	18	0
MB-4757	0	0	0	0	24
MB-4694	0	3	0	4	17
MB-4698	24	0	0	0	0
MB-4715	0	0	0	0	24
MB-4685	1	22	1	0	0
MB-4712	4	0	11	7	2
MB-4672	8	16	0	0	0
MB-4704	24	0	0	0	0
MB-4655	20	4	0	0	0
MB-4651	0	24	0	0	0
MB-4661	21	3	0	0	0
MB-4649	5	19	0	0	0
MB-4642	2	22	0	0	0
MB-4674	23	1	0	0	0
MB-4648	0	24	0	0	0
MB-5197	19	5	0	0	0
MB-5152	18	6	0	0	0
MB-5201	24	0	0	0	0
MB-5189	24	0	0	0	0
MB-5281	5	0	12	7	0
MB-5212	0	24	0	0	0
MB-5172	0	1	23	0	0
MB-5183	24	0	0	0	0
MB-5185	16	8	0	0	0
MB-5022	2	1	21	0	0
MB-5014	0	24	0	0	0
MB-4994	0	24	0	0	0
MB-5017	3	11	9	0	1
MB-4982	0	0	17	1	6
MB-5004	5	7	11	0	1
MB-4986	18	0	0	6	0
MB-5327	0	0	24	0	0
MB-5341	9	15	0	0	0
MB-5323	0	0	0	0	24
MB-5328	3	21	0	0	0
MB-5318	6	12	5	1	0
MB-5287	24	0	0	0	0
MB-5324	24	0	0	0	0
MB-4682	22	2	0	0	0
MB-4710	23	0	0	1	0
MB-4701	24	0	0	0	0
MB-4709	24	0	0	0	0
MB-4686	24	0	0	0	0
MB-4706	24	0	0	0	0
MB-4719	24	0	0	0	0
MB-4702	0	24	0	0	0
MB-4908	1	23	0	0	0
MB-4871	0	1	7	1	15
MB-4906	24	0	0	0	0
MB-4911	0	0	0	0	24
MB-4866	24	0	0	0	0
MB-4858	16	0	8	0	0
MB-4862	0	24	0	0	0
MB-4872	24	0	0	0	0
MB-4887	14	2	1	7	0
MB-4867	24	0	0	0	0
MB-4888	0	0	0	0	24
MB-4929	4	1	19	0	0
MB-4945	0	0	1	1	22
MB-4930	0	24	0	0	0
MB-4894	4	20	0	0	0
MB-4898	24	0	0	0	0
MB-4670	24	0	0	0	0
MB-5013	24	0	0	0	0
MB-4977	21	3	0	0	0
MB-4967	24	0	0	0	0
MB-4981	24	0	0	0	0
MB-4003	0	21	3	0	0
MB-4968	24	0	0	0	0
MB-5052	0	0	21	0	3
MB-5049	3	21	0	0	0
MB-5041	2	6	12	1	3
MB-5044	0	24	0	0	0
MB-5072	0	0	21	3	0
MB-4171	4	13	7	0	0
MB-5053	24	0	0	0	0
MB-5045	9	10	4	1	0
MB-5116	0	24	0	0	0
MB-5120	0	1	22	0	1
MB-5074	18	6	0	0	0
MB-5119	24	0	0	0	0
MB-5114	0	0	12	5	7
MB-4230	17	7	0	0	0
MB-4154	0	22	0	0	2
MB-5115	0	0	0	0	24
MB-4737	0	24	0	0	0
MB-4764	24	0	0	0	0
MB-4735	24	0	0	0	0
MB-4730	24	0	0	0	0
MB-4733	0	0	3	4	17
MB-4758	0	0	0	1	23
MB-5033	10	14	0	0	0
MB-4741	9	15	0	0	0
MB-4732	0	0	0	0	24
MB-5305	24	0	0	0	0
MB-5256	22	2	0	0	0
MB-5273	0	24	0	0	0
MB-5236	0	0	0	0	24
MB-5238	1	0	2	19	2
MB-5233	0	24	0	0	0
MB-5244	1	23	0	0	0
MB-5253	24	0	0	0	0
MB-5260	3	21	0	0	0
MB-4998	9	15	0	0	0
MB-4993	0	0	17	3	4
MB-5001	20	3	0	1	0
MB-5084	24	0	0	0	0
MB-4969	24	0	0	0	0
MB-4999	18	0	0	6	0
MB-5011	24	0	0	0	0
MB-4959	24	0	0	0	0
MB-4599	24	0	0	0	0
MB-4616	24	0	0	0	0
MB-4623	22	1	1	0	0
MB-4644	2	22	0	0	0
MB-4869	23	1	0	0	0
MB-4878	20	1	0	3	0
MB-4851	13	11	0	0	0
MB-4233	0	24	0	0	0
MB-4937	4	18	1	0	1
MB-4934	2	22	0	0	0
MB-4899	24	0	0	0	0
MB-4912	3	20	1	0	0
MB-4935	0	0	23	0	1
MB-4933	14	8	1	1	0
MB-4900	1	23	0	0	0
MB-4941	23	0	0	1	0
MB-5221	24	0	0	0	0
MB-5139	4	20	0	0	0
MB-5222	1	1	7	0	15
MB-5097	6	18	0	0	0
MB-5338	1	23	0	0	0
MB-5315	0	0	17	0	7
MB-5195	2	14	8	0	0
MB-5226	0	24	0	0	0
MB-5232	1	0	0	0	23
MB-5160	0	24	0	0	0
MB-5126	0	2	0	0	22
MB-5124	2	22	0	0	0
MB-4855	22	2	0	0	0
MB-5279	17	7	0	0	0
MB-4173	24	0	0	0	0
MB-5145	0	0	1	20	3
MB-4944	0	24	0	0	0
MB-4961	23	1	0	0	0
MB-5121	0	24	0	0	0
MB-4956	1	23	0	0	0
MB-4886	0	0	24	0	0
MB-4950	21	3	0	0	0
MB-4965	23	1	0	0	0
MB-4962	24	0	0	0	0
MB-4952	0	1	21	0	2
MB-5267	19	0	1	4	0
MB-5266	0	24	0	0	0
MB-5396	0	24	0	0	0
MB-4938	0	0	0	0	24
MB-5351	2	0	0	22	0
MB-5347	0	24	0	0	0
MB-5312	0	0	15	0	9
MB-5311	19	0	0	5	0
MB-5284	24	0	0	0	0
MB-4148	1	23	0	0	0
MB-5078	6	10	8	0	0
MB-5088	16	8	0	0	0
MB-5064	24	0	0	0	0
MB-5107	0	24	0	0	0
MB-5066	24	0	0	0	0
MB-5068	24	0	0	0	0
MB-5061	1	23	0	0	0
MB-5070	0	0	0	0	24
MB-5059	24	0	0	0	0
MB-4266	10	14	0	0	0
MB-4276	5	3	16	0	0
MB-4771	21	3	0	0	0
MB-4739	24	0	0	0	0
MB-5331	22	0	0	2	0
MB-4743	4	0	0	20	0
MB-4785	13	11	0	0	0
MB-4778	23	1	0	0	0
MB-4763	0	0	24	0	0
MB-4779	23	0	0	1	0
MB-4849	24	0	0	0	0
MB-4787	24	0	0	0	0
MB-4767	13	10	0	1	0
MB-4784	23	1	0	0	0
MB-5043	23	1	0	0	0
MB-4992	15	0	9	0	0
MB-5020	22	2	0	0	0
MB-5019	2	0	10	5	7
MB-5015	23	1	0	0	0
MB-5048	23	1	0	0	0
MB-5035	18	1	0	5	0
MB-5398	24	0	0	0	0
MB-5377	19	5	0	0	0
MB-5291	1	23	0	0	0
MB-5403	24	0	0	0	0
MB-5224	24	0	0	0	0
MB-5369	19	5	0	0	0
MB-5404	23	1	0	0	0
MB-5397	24	0	0	0	0
MB-5378	0	0	0	0	24
MB-5388	24	0	0	0	0
MB-5395	24	0	0	0	0
MB-5365	24	0	0	0	0
MB-5389	19	5	0	0	0
MB-5385	23	1	0	0	0
MB-5393	20	4	0	0	0
MB-5289	24	0	0	0	0
MB-5361	4	20	0	0	0
MB-5392	0	2	20	2	0
MB-5147	21	1	2	0	0
MB-4140	24	0	0	0	0
MB-5138	0	0	0	0	24
MB-5123	24	0	0	0	0
MB-5065	0	1	0	0	23
MB-4127	1	2	21	0	0
MB-5058	5	0	12	6	1
MB-5050	24	0	0	0	0
MB-5027	24	0	0	0	0
MB-5060	4	19	1	0	0
MB-5062	0	23	1	0	0
MB-5383	17	7	0	0	0
MB-5101	2	22	0	0	0
MB-5258	0	0	0	0	24
MB-5268	23	0	0	1	0
MB-5261	1	23	0	0	0
MB-5272	2	1	8	5	8
MB-5264	24	0	0	0	0
MB-5259	1	0	22	0	1
MB-5306	9	15	0	0	0
MB-5270	17	7	0	0	0
MB-5411	0	0	23	0	1
MB-5490	22	2	0	0	0
MB-5421	0	0	0	1	23
MB-5348	0	0	0	0	24
MB-5429	24	0	0	0	0
MB-5405	1	22	1	0	0
MB-5414	3	16	5	0	0
MB-5489	24	0	0	0	0
MB-5417	0	1	21	0	2
MB-5481	4	20	0	0	0
MB-5409	1	0	23	0	0
MB-5413	24	0	0	0	0
MB-5299	0	0	0	0	24
MB-5408	6	0	7	10	1
MB-5475	14	10	0	0	0
MB-5505	2	22	0	0	0
MB-5100	0	0	0	0	24
MB-5325	1	0	0	0	23
MB-5502	0	24	0	0	0
MB-5485	3	21	0	0	0
MB-4293	24	0	0	0	0
MB-4289	2	14	8	0	0
MB-5293	17	6	1	0	0
MB-5381	0	0	23	0	1
MB-4834	0	24	0	0	0
MB-5498	10	1	12	0	1
MB-4749	15	9	0	0	0
MB-4818	14	10	0	0	0
MB-4805	24	0	0	0	0
MB-4809	1	0	0	0	23
MB-5418	0	24	0	0	0
MB-5441	10	0	13	1	0
MB-5424	24	0	0	0	0
MB-5296	2	0	18	1	3
MB-5446	0	0	15	8	1
MB-5137	0	0	0	0	24
MB-5219	24	0	0	0	0
MB-5093	11	11	1	1	0
MB-5350	2	15	3	1	3
MB-5230	24	0	0	0	0
MB-5206	24	0	0	0	0
MB-4687	19	4	1	0	0
MB-5433	20	3	0	1	0
MB-5442	1	0	0	0	23
MB-5427	0	0	0	1	23
MB-5491	14	10	0	0	0
MB-5493	1	23	0	0	0
MB-5451	24	0	0	0	0
MB-5454	1	19	3	0	1
MB-5360	24	0	0	0	0
MB-5229	3	0	17	3	1
MB-4827	24	0	0	0	0
MB-5455	23	0	0	1	0
MB-5349	24	0	0	0	0
MB-5370	1	23	0	0	0
MB-5290	24	0	0	0	0
MB-5366	2	11	11	0	0
MB-5382	21	3	0	0	0
MB-5402	23	1	0	0	0
MB-5288	2	22	0	0	0
MB-5384	20	2	0	2	0
MB-5358	24	0	0	0	0
MB-4357	13	4	6	1	0
MB-4991	0	24	0	0	0
MB-5401	24	0	0	0	0
MB-5387	0	0	0	0	24
MB-5390	0	0	0	0	24
MB-5412	24	0	0	0	0
MB-5193	18	6	0	0	0
MB-5182	24	0	0	0	0
MB-5157	3	0	17	0	4
MB-5205	0	0	0	0	24
MB-5161	3	0	0	21	0
MB-5292	0	24	0	0	0
MB-5211	0	24	0	0	0
MB-5218	0	24	0	0	0
MB-5209	1	0	7	0	16
MB-5227	20	4	0	0	0
MB-5213	0	0	21	0	3
MB-5166	1	23	0	0	0
MB-5163	22	2	0	0	0
MB-5188	0	1	2	2	19
MB-5143	24	0	0	0	0
MB-5329	15	1	8	0	0
MB-5322	18	6	0	0	0
MB-5310	21	3	0	0	0
MB-4000	24	0	0	0	0
MB-5240	24	0	0	0	0
MB-5228	7	17	0	0	0
MB-5136	24	0	0	0	0
MB-5140	1	23	0	0	0
MB-5106	4	20	0	0	0
MB-5117	23	1	0	0	0
MB-5104	24	0	0	0	0
MB-5131	24	0	0	0	0
MB-5109	18	0	0	6	0
MB-5176	8	16	0	0	0
MB-5158	24	0	0	0	0
MB-5076	0	0	0	2	22
MB-5215	11	13	0	0	0
MB-5223	0	0	1	6	17
MB-5179	23	0	0	1	0
MB-5330	24	0	0	0	0
MB-5144	7	16	1	0	0
MB-5196	9	15	0	0	0
MB-5200	0	24	0	0	0
MB-5583	24	0	0	0	0
MB-5601	24	0	0	0	0
MB-5632	2	22	0	0	0
MB-5616	0	0	0	0	24
MB-5604	0	24	0	0	0
MB-5589	24	0	0	0	0
MB-5582	24	0	0	0	0
MB-5625	0	0	0	0	24
MB-5571	24	0	0	0	0
MB-5596	24	0	0	0	0
MB-5590	2	22	0	0	0
MB-5599	23	1	0	0	0
MB-5629	13	9	0	2	0
MB-5579	24	0	0	0	0
MB-5623	8	16	0	0	0
MB-5654	10	14	0	0	0
MB-5617	24	0	0	0	0
MB-5638	20	3	0	1	0
MB-5635	20	3	1	0	0
MB-5642	24	0	0	0	0
MB-5647	22	2	0	0	0
MB-4018	23	1	0	0	0
MB-5584	1	13	10	0	0
MB-5626	24	0	0	0	0
MB-5602	1	0	16	0	7
MB-5653	13	11	0	0	0
MB-5576	1	23	0	0	0
MB-5575	1	23	0	0	0
MB-5646	10	14	0	0	0
MB-5634	1	0	0	0	23
MB-5591	17	7	0	0	0
MB-5567	23	1	0	0	0
MB-5651	0	0	2	2	20
MB-5603	24	0	0	0	0
MB-5622	5	19	0	0	0
MB-5597	24	0	0	0	0
MB-5613	0	24	0	0	0
MB-5580	24	0	0	0	0
MB-5645	24	0	0	0	0
MB-5548	0	0	0	0	24
MB-5526	0	0	0	0	24
MB-5531	0	0	0	0	24
MB-5468	0	0	2	0	22
MB-5474	1	1	13	0	9
MB-5514	24	0	0	0	0
MB-5302	11	3	0	9	1
MB-5510	24	0	0	0	0
MB-5473	24	0	0	0	0
MB-5484	24	0	0	0	0
MB-5432	24	0	0	0	0
MB-5525	2	21	1	0	0
MB-5562	6	18	0	0	0
MB-5497	1	23	0	0	0
MB-5551	0	0	0	0	24
MB-5300	24	0	0	0	0
MB-5560	0	0	0	0	24
MB-5550	22	2	0	0	0
MB-5520	18	3	3	0	0
MB-5529	1	0	0	0	23
MB-5554	20	4	0	0	0
MB-5301	9	0	15	0	0
MB-4421	21	3	0	0	0
MB-4408	1	1	2	0	20
MB-4146	0	0	1	4	19
MB-5534	1	23	0	0	0
MB-5521	5	18	0	1	0
MB-5482	0	0	0	0	24
MB-5483	2	5	16	0	1
MB-5532	12	12	0	0	0
MB-5556	3	21	0	0	0
MB-5518	1	23	0	0	0
MB-5486	2	22	0	0	0
MB-5511	5	1	18	0	0
MB-5422	22	2	0	0	0
MB-5535	1	0	23	0	0
MB-5477	0	24	0	0	0
MB-5472	24	0	0	0	0
MB-5540	0	24	0	0	0
MB-5184	22	0	0	2	0
MB-5294	0	0	0	0	24
MB-5565	0	0	0	0	24
MB-5040	1	23	0	0	0
MB-4801	22	2	0	0	0
MB-5499	23	0	0	1	0
MB-5459	0	23	1	0	0
MB-5243	6	18	0	0	0
MB-4120	19	5	0	0	0
MB-4966	20	3	1	0	0
MB-5457	24	0	0	0	0
MB-4011	17	7	0	0	0
MB-5478	24	0	0	0	0
MB-4822	24	0	0	0	0
MB-4017	0	24	0	0	0
MB-5018	21	3	0	0	0
MB-4791	3	21	0	0	0
MB-5118	24	0	0	0	0
MB-4806	24	0	0	0	0
MB-4970	6	18	0	0	0
MB-2964	12	1	11	0	0
MB-2963	8	3	5	5	3
MB-2957	0	0	0	0	24
MB-2954	5	19	0	0	0
MB-2916	24	0	0	0	0
MB-2725	19	0	0	5	0
MB-2711	24	0	0	0	0
MB-2730	1	23	0	0	0
MB-2669	23	0	0	1	0
MB-2705	2	22	0	0	0
MB-2728	1	23	0	0	0
MB-2708	2	22	0	0	0
MB-2735	1	23	0	0	0
MB-3035	24	0	0	0	0
MB-3064	24	0	0	0	0
MB-3060	0	24	0	0	0
MB-3049	23	0	0	1	0
MB-3037	23	1	0	0	0
MB-3063	0	0	0	0	24
MB-3083	0	24	0	0	0
MB-3046	0	0	0	1	23
MB-3067	0	0	0	0	24
MB-3351	24	0	0	0	0
MB-3367	0	0	0	2	22
MB-3361	0	24	0	0	0
MB-3412	24	0	0	0	0
MB-3371	4	20	0	0	0
MB-3429	4	0	0	20	0
MB-3360	1	23	0	0	0
MB-3403	22	2	0	0	0
MB-3350	6	18	0	0	0
MB-3355	1	0	23	0	0
MB-3329	1	2	18	0	3
MB-3467	0	0	23	0	1
MB-3341	24	0	0	0	0
MB-3298	24	0	0	0	0
MB-3357	0	24	0	0	0
MB-3388	0	24	0	0	0
MB-3365	24	0	0	0	0
MB-2749	23	0	0	1	0
MB-2754	6	0	5	12	1
MB-2752	24	0	0	0	0
MB-2745	18	6	0	0	0
MB-2747	19	5	0	0	0
MB-2760	16	8	0	0	0
MB-2742	0	0	16	0	8
MB-2750	24	0	0	0	0
MB-2753	0	0	0	0	24
MB-2966	19	5	0	0	0
MB-2953	1	21	2	0	0
MB-2969	23	1	0	0	0
MB-3014	0	0	0	0	24
MB-2947	24	0	0	0	0
MB-2951	24	0	0	0	0
MB-2960	16	8	0	0	0
MB-2970	24	0	0	0	0
MB-2971	24	0	0	0	0
MB-2933	24	0	0	0	0
MB-3479	0	0	0	24	0
MB-3490	1	23	0	0	0
MB-3487	0	24	0	0	0
MB-3459	1	23	0	0	0
MB-3476	0	0	1	0	23
MB-3492	6	18	0	0	0
MB-3452	6	0	1	16	1
MB-3303	0	24	0	0	0
MB-3328	23	1	0	0	0
MB-3300	9	15	0	0	0
MB-3277	0	0	0	0	24
MB-3254	24	0	0	0	0
MB-3275	0	24	0	0	0
MB-3272	4	19	1	0	0
MB-3271	0	0	0	0	24
MB-3292	0	0	0	0	24
MB-3840	1	23	0	0	0
MB-2536	24	0	0	0	0
MB-2564	24	0	0	0	0
MB-2513	3	0	20	1	0
MB-2617	2	21	1	0	0
MB-2614	24	0	0	0	0
MB-2632	0	0	22	0	2
MB-2556	1	0	0	22	1
MB-2624	22	0	0	2	0
MB-2867	23	0	0	1	0
MB-2922	0	1	23	0	0
MB-2917	0	0	1	0	23
MB-2858	1	23	0	0	0
MB-2854	23	0	0	1	0
MB-2853	9	14	1	0	0
MB-3235	0	21	3	0	0
MB-3165	0	2	12	0	10
MB-3171	24	0	0	0	0
MB-3167	19	5	0	0	0
MB-3222	24	0	0	0	0
MB-3706	0	0	0	1	23
MB-3497	1	0	22	1	0
MB-3488	4	1	18	1	0
MB-3711	24	0	0	0	0
MB-3548	9	15	0	0	0
MB-3506	0	23	1	0	0
MB-3525	0	24	0	0	0
MB-3606	0	0	24	0	0
MB-3453	2	0	4	13	5
MB-3545	19	0	0	5	0
MB-3470	2	0	20	1	1
MB-2765	22	2	0	0	0
MB-2763	15	9	0	0	0
MB-2767	0	22	1	0	1
MB-2790	22	2	0	0	0
MB-2769	1	23	0	0	0
MB-2842	0	0	0	0	24
MB-2772	2	22	0	0	0
MB-2779	16	6	0	2	0
MB-2774	9	15	0	0	0
MB-2983	0	24	0	0	0
MB-3005	23	1	0	0	0
MB-2977	24	0	0	0	0
MB-2996	19	5	0	0	0
MB-2999	14	10	0	0	0
MB-2994	15	9	0	0	0
MB-3025	0	2	21	1	0
MB-2984	0	24	0	0	0
MB-3002	17	5	0	2	0
MB-2845	16	0	0	8	0
MB-2912	0	0	0	0	24
MB-2844	0	23	1	0	0
MB-2847	0	1	23	0	0
MB-2849	0	0	5	2	17
MB-2851	22	0	0	2	0
MB-2848	24	0	0	0	0
MB-2863	24	0	0	0	0
MB-2840	24	0	0	0	0
MB-2843	23	1	0	0	0
MB-3013	23	0	0	1	0
MB-3058	0	0	1	2	21
MB-3016	1	23	0	0	0
MB-3057	0	0	0	0	24
MB-3008	24	0	0	0	0
MB-3021	13	8	2	1	0
MB-3032	23	0	0	1	0
MB-3007	9	15	0	0	0
MB-3033	24	0	0	0	0
MB-3026	23	1	0	0	0
MB-3006	6	0	0	18	0
MB-3439	24	0	0	0	0
MB-3437	11	13	0	0	0
MB-3395	0	0	0	0	24
MB-3386	0	1	23	0	0
MB-3382	0	24	0	0	0
MB-3379	24	0	0	0	0
MB-3430	22	2	0	0	0
MB-3389	0	24	0	0	0
MB-3378	24	0	0	0	0
MB-3110	24	0	0	0	0
MB-3079	24	0	0	0	0
MB-3103	6	18	0	0	0
MB-3102	15	9	0	0	0
MB-3085	6	0	0	18	0
MB-3122	0	19	4	1	0
MB-3104	21	2	0	0	1
MB-3123	0	0	0	0	24
MB-3121	24	0	0	0	0
MB-2835	23	0	0	1	0
MB-2838	23	1	0	0	0
MB-2801	22	2	0	0	0
MB-2834	0	2	17	0	5
MB-2796	4	20	0	0	0
MB-2857	0	0	0	0	24
MB-2819	24	0	0	0	0
MB-2781	6	18	0	0	0
MB-2793	22	2	0	0	0
MB-2827	0	0	0	0	24
MB-2814	1	23	0	0	0
MB-2791	24	0	0	0	0
MB-2803	0	24	0	0	0
MB-2797	20	1	0	3	0
MB-2795	9	15	0	0	0
MB-2786	22	2	0	0	0
MB-3850	24	0	0	0	0
MB-3556	0	2	22	0	0
MB-3838	1	23	0	0	0
MB-3707	18	6	0	0	0
MB-3600	0	24	0	0	0
MB-3824	0	24	0	0	0
MB-3823	24	0	0	0	0
MB-3781	23	1	0	0	0
MB-2642	0	24	0	0	0
MB-2686	0	24	0	0	0
MB-2616	9	0	0	15	0
MB-2634	0	24	0	0	0
MB-2613	0	24	0	0	0
MB-3842	0	24	0	0	0
MB-3866	0	0	24	0	0
MB-3874	22	2	0	0	0
MB-3871	23	1	0	0	0
MB-3702	0	0	1	2	21
MB-3105	24	0	0	0	0
MB-3852	6	18	0	0	0
MB-3854	24	0	0	0	0
MB-3865	23	0	0	1	0
MB-3228	24	0	0	0	0
MB-3028	10	7	7	0	0
MB-3502	0	0	0	1	23
MB-3567	0	1	1	0	22
MB-3752	0	0	0	0	24
MB-3450	24	0	0	0	0
MB-0444	5	19	0	0	0
MB-0476	3	0	0	20	1
MB-0610	23	0	0	1	0
MB-0451	22	0	0	2	0
MB-0133	19	0	0	5	0

## Sheet: Label METABRIC Validat. PAM50
	Luminal A	Luminal B	Her2-enriched	Normal-like	Basal
	X1	X2	X3	X4	X5
MB-0005	6	18	0	0	0
MB-0048	6	10	0	6	2
MB-0025	0	24	0	0	0
MB-0083	10	14	0	0	0
MB-0053	1	23	0	0	0
MB-0056	0	24	0	0	0
MB-0068	21	1	0	2	0
MB-0093	3	21	0	0	0
MB-0079	0	7	12	1	4
MB-0108	4	19	0	1	0
MB-0006	15	9	0	0	0
MB-0014	22	2	0	0	0
MB-0022	10	13	0	1	0
MB-0039	12	12	0	0	0
MB-0062	0	1	0	0	23
MB-0054	2	22	0	0	0
MB-0081	10	13	0	1	0
MB-0071	5	19	0	0	0
MB-0099	10	13	0	1	0
MB-0064	1	23	0	0	0
MB-0107	0	24	0	0	0
MB-4681	24	0	0	0	0
MB-4626	17	0	6	1	0
MB-4639	17	7	0	0	0
MB-4673	1	23	0	0	0
MB-4711	0	0	13	3	8
MB-4607	24	0	0	0	0
MB-4669	0	24	0	0	0
MB-4015	0	0	22	0	2
MB-2931	23	1	0	0	0
MB-2927	22	2	0	0	0
MB-2919	23	1	0	0	0
MB-2944	24	0	0	0	0
MB-2929	1	0	23	0	0
MB-2932	2	22	0	0	0
MB-2724	1	0	1	14	8
MB-2712	24	0	0	0	0
MB-2720	12	12	0	0	0
MB-3062	0	0	0	0	24
MB-3050	3	21	0	0	0
MB-4722	24	0	0	0	0
MB-4731	0	4	19	0	1
MB-4725	12	12	0	0	0
MB-4707	0	0	0	0	24
MB-4643	0	0	24	0	0
MB-3363	0	6	2	0	16
MB-3383	0	0	0	0	24
MB-3344	24	0	0	0	0
MB-3381	23	0	0	1	0
MB-3297	0	0	0	0	24
MB-3301	12	12	0	0	0
MB-3088	24	0	0	0	0
MB-2764	1	0	0	23	0
MB-2744	0	0	0	24	0
MB-7114	0	0	0	0	24
MB-7118	24	0	0	0	0
MB-7113	24	0	0	0	0
MB-7130	1	23	0	0	0
MB-7149	1	23	0	0	0
MB-7140	0	24	0	0	0
MB-7148	22	2	0	0	0
MB-7208	0	1	22	0	1
MB-7170	22	2	0	0	0
MB-7174	0	24	0	0	0
MB-7252	0	0	23	0	1
MB-7244	24	0	0	0	0
MB-7187	2	0	0	22	0
MB-7251	1	0	23	0	0
MB-7173	22	2	0	0	0
MB-3001	0	0	0	0	24
MB-2952	24	0	0	0	0
MB-7097	14	9	1	0	0
MB-7104	0	13	9	0	2
MB-7099	1	22	1	0	0
MB-7069	1	0	22	0	1
MB-7066	14	0	1	9	0
MB-7100	3	21	0	0	0
MB-7067	0	0	18	0	6
MB-7073	1	0	22	0	1
MB-7063	24	0	0	0	0
MB-7102	5	19	0	0	0
MB-7068	0	18	6	0	0
MB-7075	1	23	0	0	0
MB-7053	24	0	0	0	0
MB-7074	20	0	0	4	0
MB-7057	10	0	0	14	0
MB-7109	0	24	0	0	0
MB-7051	1	23	0	0	0
MB-7071	5	18	0	1	0
MB-7106	24	0	0	0	0
MB-7059	0	2	22	0	0
MB-7107	17	5	2	0	0
MB-7076	23	1	0	0	0
MB-7111	4	14	2	1	3
MB-7015	1	23	0	0	0
MB-7026	21	3	0	0	0
MB-7013	24	0	0	0	0
MB-7023	0	0	0	0	24
MB-7024	0	24	0	0	0
MB-7014	9	12	1	2	0
MB-7017	0	0	0	0	24
MB-7019	24	0	0	0	0
MB-3510	24	0	0	0	0
MB-3500	0	0	0	0	24
MB-3396	1	0	13	0	10
MB-3435	0	1	23	0	0
MB-7186	1	23	0	0	0
MB-7142	1	23	0	0	0
MB-7196	1	21	1	1	0
MB-7171	2	21	0	0	1
MB-7145	0	0	0	0	24
MB-7132	23	1	0	0	0
MB-7189	0	24	0	0	0
MB-7137	24	0	0	0	0
MB-7181	10	14	0	0	0
MB-7155	0	0	0	0	24
MB-7138	0	24	0	0	0
MB-3295	12	0	0	12	0
MB-3218	0	0	0	0	24
MB-7232	24	0	0	0	0
MB-7281	2	0	19	1	2
MB-7270	0	2	8	0	14
MB-7231	24	0	0	0	0
MB-7220	23	1	0	0	0
MB-7277	24	0	0	0	0
MB-7269	0	0	0	0	24
MB-7280	24	0	0	0	0
MB-7227	14	0	3	7	0
MB-7278	24	0	0	0	0
MB-2610	24	0	0	0	0
MB-2517	0	1	20	1	2
MB-2896	22	0	1	1	0
MB-2901	1	23	0	0	0
MB-2895	0	0	23	0	1
MB-2900	1	0	0	23	0
MB-2939	0	24	0	0	0
MB-7008	5	0	7	11	1
MB-7002	11	13	0	0	0
MB-7000	2	22	0	0	0
MB-7006	24	0	0	0	0
MB-7007	0	0	3	0	21
MB-7011	0	24	0	0	0
MB-7001	23	1	0	0	0
MB-7009	0	0	0	0	24
MB-7003	20	0	1	3	0
MB-7005	21	3	0	0	0
MB-7010	24	0	0	0	0
MB-3153	1	0	20	0	3
MB-3211	0	0	0	0	24
MB-3181	1	23	0	0	0
MB-3252	23	0	0	1	0
MB-3266	12	12	0	0	0
MB-7082	0	1	23	0	0
MB-7081	0	0	0	0	24
MB-7093	24	0	0	0	0
MB-7083	3	21	0	0	0
MB-7091	24	0	0	0	0
MB-7065	20	4	0	0	0
MB-7085	23	0	0	1	0
MB-7096	24	0	0	0	0
MB-7018	16	8	0	0	0
MB-7088	2	0	21	1	0
MB-7055	0	0	6	0	18
MB-7080	24	0	0	0	0
MB-7161	24	0	0	0	0
MB-7115	0	6	18	0	0
MB-7123	24	0	0	0	0
MB-7176	17	7	0	0	0
MB-7121	0	0	0	0	24
MB-7172	21	3	0	0	0
MB-7164	24	0	0	0	0
MB-7127	8	1	1	13	1
MB-7128	24	0	0	0	0
MB-7157	5	19	0	0	0
MB-7092	1	23	0	0	0
MB-7135	1	2	21	0	0
MB-3754	7	15	2	0	0
MB-3536	12	0	0	12	0
MB-3748	24	0	0	0	0
MB-3530	21	3	0	0	0
MB-3582	3	0	1	20	0
MB-3528	2	7	15	0	0
MB-3547	23	0	0	1	0
MB-3576	0	24	0	0	0
MB-2770	23	0	0	1	0
MB-2758	1	0	13	0	10
MB-2771	1	0	0	0	23
MB-7152	0	24	0	0	0
MB-7143	0	0	23	0	1
MB-7197	21	3	0	0	0
MB-7153	4	18	2	0	0
MB-7144	2	22	0	0	0
MB-7185	24	0	0	0	0
MB-7199	2	22	0	0	0
MB-7158	1	0	0	6	17
MB-7163	24	0	0	0	0
MB-7215	24	0	0	0	0
MB-7200	21	3	0	0	0
MB-7193	0	24	0	0	0
MB-7188	24	0	0	0	0
MB-7198	4	7	4	6	3
MB-7256	3	1	19	1	0
MB-7258	0	0	0	0	24
MB-7194	0	24	0	0	0
MB-7254	23	1	0	0	0
MB-7262	0	15	9	0	0
MB-2990	24	0	0	0	0
MB-2993	0	0	0	0	24
MB-3031	0	10	13	0	1
MB-2904	0	0	0	0	24
MB-2846	11	0	1	11	1
MB-7154	0	0	0	0	24
MB-7229	22	2	0	0	0
MB-7151	0	0	0	0	24
MB-7228	20	0	0	4	0
MB-7218	24	0	0	0	0
MB-7147	0	24	0	0	0
MB-7219	24	0	0	0	0
MB-7165	0	0	0	2	22
MB-7150	1	23	0	0	0
MB-3436	1	23	0	0	0
MB-3462	24	0	0	0	0
MB-3417	13	11	0	0	0
MB-2721	24	0	0	0	0
MB-3092	6	18	0	0	0
MB-2821	1	0	0	4	19
MB-2850	0	0	0	0	24
MB-2820	24	0	0	0	0
MB-2823	18	0	1	5	0
MB-2792	11	13	0	0	0
MB-7273	0	0	24	0	0
MB-7283	10	14	0	0	0
MB-7284	23	0	0	1	0
MB-7279	0	7	17	0	0
MB-7233	24	0	0	0	0
MB-7287	0	24	0	0	0
MB-7250	3	0	19	1	1
MB-7238	0	24	0	0	0
MB-7285	17	7	0	0	0
MB-7260	1	10	13	0	0
MB-7264	24	0	0	0	0
MB-7268	23	1	0	0	0
MB-7276	23	1	0	0	0
MB-7212	21	0	0	3	0
MB-7267	0	0	0	0	24
MB-7266	22	2	0	0	0
MB-7216	23	1	0	0	0
MB-7195	24	0	0	0	0
MB-7201	5	2	11	5	1
MB-7217	24	0	0	0	0
MB-2815	19	0	0	5	0
MB-2833	1	0	0	0	23
MB-3614	0	24	0	0	0
MB-7052	0	2	3	0	19
MB-7124	22	2	0	0	0
MB-7122	7	6	10	0	1
MB-7133	8	16	0	0	0
MB-7084	0	0	0	0	24
MB-7101	24	0	0	0	0
MB-7116	6	18	0	0	0
MB-7131	2	22	0	0	0
MB-7090	0	0	10	1	13
MB-7095	23	1	0	0	0
MB-7094	1	21	2	0	0
MB-7087	0	0	1	0	23
MB-7077	24	0	0	0	0
MB-7072	0	24	0	0	0
MB-7041	24	0	0	0	0
MB-7044	1	0	0	23	0
MB-7022	9	15	0	0	0
MB-7070	9	15	0	0	0
MB-7079	9	0	0	15	0
MB-7035	3	5	13	3	0
MB-7025	0	0	0	0	24
MB-7062	24	0	0	0	0
MB-7036	0	0	0	0	24
MB-7046	1	23	0	0	0
MB-4839	18	6	0	0	0
MB-5559	1	0	1	15	7
MB-5463	8	16	0	0	0
MB-4744	7	17	0	0	0
MB-4769	1	1	0	0	22
MB-4484	13	0	0	11	0
MB-5558	1	0	3	15	5
MB-4750	5	19	0	0	0
MB-4793	0	0	0	1	23
MB-4843	22	2	0	0	0
MB-5563	24	0	0	0	0
MB-5546	24	0	0	0	0
MB-5513	0	17	7	0	0
MB-5656	18	0	0	6	0
MB-5530	16	7	1	0	0
MB-5553	13	11	0	0	0
MB-4836	1	9	14	0	0
MB-4828	1	23	0	0	0
MB-4679	0	0	0	0	24
MB-4033	24	0	0	0	0
MB-4692	21	1	2	0	0
MB-4675	24	0	0	0	0
MB-4653	12	0	0	12	0
MB-4663	0	0	5	0	19
MB-4660	0	0	0	1	23
MB-5275	13	9	2	0	0
MB-4654	2	22	0	0	0
MB-2618	0	24	0	0	0
MB-2718	0	0	0	0	24
MB-2643	1	0	4	6	13
MB-2629	3	21	0	0	0
MB-2645	0	22	1	0	1
MB-2626	19	3	1	1	0
MB-6263	24	0	0	0	0
MB-6305	0	0	0	0	24
MB-6185	23	0	0	1	0
MB-6187	0	0	0	24	0
MB-6248	0	0	0	0	24
MB-6330	4	0	17	3	0
MB-6184	0	24	0	0	0
MB-6329	0	24	0	0	0
MB-6283	23	1	0	0	0
MB-6359	18	6	0	0	0
MB-6337	0	0	22	0	2
MB-6256	23	0	0	1	0
MB-6201	24	0	0	0	0
MB-6207	24	0	0	0	0
MB-6194	18	0	0	6	0
MB-6281	13	11	0	0	0
MB-6322	11	13	0	0	0
MB-6223	0	2	14	0	8
MB-6190	24	0	0	0	0
MB-6306	4	20	0	0	0
MB-6188	0	0	0	0	24
MB-6318	0	2	19	0	3
MB-6228	2	0	0	16	6
MB-6226	17	6	0	1	0
MB-6225	24	0	0	0	0
MB-6280	0	0	0	0	24
MB-6253	24	0	0	0	0
MB-6098	0	0	0	0	24
MB-6017	24	0	0	0	0
MB-6019	16	1	0	7	0
MB-6163	24	0	0	0	0
MB-6157	16	3	4	1	0
MB-6179	18	6	0	0	0
MB-6105	18	6	0	0	0
MB-6047	0	24	0	0	0
MB-6001	23	1	0	0	0
MB-6050	24	0	0	0	0
MB-6169	3	1	17	0	3
MB-4548	1	1	15	1	6
MB-4564	24	0	0	0	0
MB-4591	2	22	0	0	0
MB-4557	24	0	0	0	0
MB-4601	0	0	23	0	1
MB-4598	0	24	0	0	0
MB-4578	24	0	0	0	0
MB-4593	24	0	0	0	0
MB-5186	23	1	0	0	0
MB-4974	0	0	0	0	24
MB-4978	7	0	0	17	0
MB-5086	24	0	0	0	0
MB-5150	24	0	0	0	0
MB-5345	22	0	0	2	0
MB-4696	0	1	0	0	23
MB-4695	17	0	0	7	0
MB-4714	0	0	0	0	24
MB-4705	21	0	0	3	0
MB-4882	24	0	0	0	0
MB-4879	0	0	23	0	1
MB-4881	0	0	0	0	24
MB-4846	0	24	0	0	0
MB-4870	24	0	0	0	0
MB-4845	24	0	0	0	0
MB-4904	0	1	23	0	0
MB-4865	0	0	0	0	24
MB-4876	4	17	1	2	0
MB-4860	23	0	0	1	0
MB-5081	23	0	0	1	0
MB-4897	2	0	0	22	0
MB-4925	23	1	0	0	0
MB-4883	24	0	0	0	0
MB-4896	1	1	10	3	9
MB-4987	22	0	0	2	0
MB-4416	0	0	0	0	24
MB-4374	24	0	0	0	0
MB-4407	0	0	0	1	23
MB-5039	0	24	0	0	0
MB-4119	10	13	1	0	0
MB-4091	24	0	0	0	0
MB-5079	24	0	0	0	0
MB-5073	24	0	0	0	0
MB-5105	24	0	0	0	0
MB-4254	0	0	0	0	24
MB-5174	2	3	19	0	0
MB-4742	24	0	0	0	0
MB-5239	7	17	0	0	0
MB-5251	24	0	0	0	0
MB-4996	24	0	0	0	0
MB-4282	22	1	0	1	0
MB-4603	24	0	0	0	0
MB-4621	0	0	0	0	24
MB-4853	24	0	0	0	0
MB-4362	22	0	0	2	0
MB-4602	0	24	0	0	0
MB-4222	7	4	13	0	0
MB-4893	0	0	0	0	24
MB-4859	5	0	0	18	1
MB-4212	24	0	0	0	0
MB-4873	16	8	0	0	0
MB-4942	0	0	0	0	24
MB-4949	1	23	0	0	0
MB-4928	0	6	16	2	0
MB-5098	23	0	0	1	0
MB-5313	10	13	0	1	0
MB-4145	21	3	0	0	0
MB-5122	23	1	0	0	0
MB-5278	14	0	0	10	0
MB-4213	17	7	0	0	0
MB-4126	10	0	13	1	0
MB-4957	1	23	0	0	0
MB-5470	14	7	1	2	0
MB-5317	7	17	0	0	0
MB-5308	10	0	0	14	0
MB-4976	24	0	0	0	0
MB-5277	23	0	0	1	0
MB-5110	15	0	0	9	0
MB-4046	11	7	6	0	0
MB-4012	3	0	21	0	0
MB-4141	10	11	3	0	0
MB-4001	24	0	0	0	0
MB-4792	0	0	0	0	24
MB-4738	14	0	0	10	0
MB-4264	16	7	0	1	0
MB-4794	24	0	0	0	0
MB-4782	0	0	0	24	0
MB-5008	0	1	23	0	0
MB-4426	9	4	10	1	0
MB-4390	24	0	0	0	0
MB-4434	11	10	3	0	0
MB-4368	23	1	0	0	0
MB-4442	22	0	0	2	0
MB-4418	22	2	0	0	0
MB-4381	22	0	1	1	0
MB-4395	0	23	1	0	0
MB-4630	0	24	0	0	0
MB-6010	0	23	1	0	0
MB-6021	24	0	0	0	0
MB-6059	22	0	0	2	0
MB-6154	5	19	0	0	0
MB-6097	15	6	3	0	0
MB-6107	18	1	2	3	0
MB-6023	18	1	0	5	0
MB-6152	0	0	17	0	7
MB-6018	24	0	0	0	0
MB-6082	20	0	0	4	0
MB-6029	24	0	0	0	0
MB-5295	0	0	0	0	24
MB-5386	15	9	0	0	0
MB-5092	24	0	0	0	0
MB-6068	0	0	0	0	24
MB-6039	1	23	0	0	0
MB-6022	3	21	0	0	0
MB-6125	23	0	0	1	0
MB-6053	8	16	0	0	0
MB-6135	0	24	0	0	0
MB-6042	24	0	0	0	0
MB-6058	0	0	0	0	24
MB-6052	2	0	0	20	2
MB-5368	23	0	0	1	0
MB-4189	3	4	16	0	1
MB-5335	0	0	0	0	24
MB-4008	4	20	0	0	0
MB-5134	24	0	0	0	0
MB-4139	0	24	0	0	0
MB-5130	19	0	0	5	0
MB-5135	0	0	0	0	24
MB-4880	0	0	0	0	24
MB-5054	0	0	11	10	3
MB-5057	0	0	0	0	24
MB-4098	21	1	2	0	0
MB-4760	24	0	0	0	0
MB-5102	0	0	1	0	23
MB-5420	8	2	1	12	1
MB-5458	0	2	19	1	2
MB-5492	24	0	0	0	0
MB-5407	24	0	0	0	0
MB-5394	0	0	24	0	0
MB-5410	24	0	0	0	0
MB-5435	7	17	0	0	0
MB-5406	1	23	0	0	0
MB-4329	23	1	0	0	0
MB-4005	4	20	0	0	0
MB-6288	13	11	0	0	0
MB-6272	0	0	0	0	24
MB-6218	24	0	0	0	0
MB-6246	0	4	20	0	0
MB-6217	2	22	0	0	0
MB-6206	24	0	0	0	0
MB-6308	24	0	0	0	0
MB-6271	24	0	0	0	0
MB-6245	0	0	0	1	23
MB-6233	13	11	0	0	0
MB-4343	6	3	15	0	0
MB-4281	0	15	9	0	0
MB-4283	24	0	0	0	0
MB-4341	0	0	24	0	0
MB-4303	0	0	17	2	5
MB-4274	23	1	0	0	0
MB-4292	24	0	0	0	0
MB-4278	8	14	2	0	0
MB-5399	24	0	0	0	0
MB-5364	23	0	0	1	0
MB-3526	16	0	0	8	0
MB-6138	22	2	0	0	0
MB-6049	1	23	0	0	0
MB-6055	0	0	1	0	23
MB-6108	20	0	1	3	0
MB-6044	10	1	7	6	0
MB-6181	24	0	0	0	0
MB-6100	0	0	24	0	0
MB-6085	0	0	21	0	3
MB-6113	15	2	2	5	0
MB-6079	19	5	0	0	0
MB-6103	21	0	0	3	0
MB-6016	24	0	0	0	0
MB-6149	19	4	0	1	0
MB-6131	0	2	22	0	0
MB-6007	12	10	2	0	0
MB-6147	3	0	0	21	0
MB-6114	7	2	15	0	0
MB-6167	23	1	0	0	0
MB-6146	1	21	2	0	0
MB-6092	23	0	0	1	0
MB-6160	0	1	23	0	0
MB-6075	0	24	0	0	0
MB-6011	0	24	0	0	0
MB-6071	24	0	0	0	0
MB-6214	24	0	0	0	0
MB-6334	7	16	1	0	0
MB-6346	18	6	0	0	0
MB-6319	22	1	1	0	0
MB-6200	22	2	0	0	0
MB-6336	0	0	0	0	24
MB-6211	24	0	0	0	0
MB-6232	24	0	0	0	0
MB-6234	20	0	0	4	0
MB-6300	23	1	0	0	0
MB-5533	23	0	0	1	0
MB-5543	20	1	0	3	0
MB-4236	16	6	2	0	0
MB-4234	24	0	0	0	0
MB-4270	0	17	7	0	0
MB-4235	4	0	2	4	14
MB-4250	24	0	0	0	0
MB-5467	14	0	0	10	0
MB-4323	20	4	0	0	0
MB-4318	0	24	0	0	0
MB-4333	21	0	0	3	0
MB-4339	1	21	2	0	0
MB-4322	24	0	0	0	0
MB-4351	0	2	21	1	0
MB-5063	0	0	24	0	0
MB-4360	1	0	17	2	4
MB-4375	21	0	0	3	0
MB-4798	21	0	0	3	0
MB-4746	22	2	0	0	0
MB-4838	2	22	0	0	0
MB-4829	19	5	0	0	0
MB-4802	3	21	0	0	0
MB-5426	1	0	7	1	15
MB-5444	24	0	0	0	0
MB-5431	1	2	1	4	16
MB-5447	1	23	0	0	0
MB-5434	14	10	0	0	0
MB-5255	2	0	0	19	3
MB-5231	1	1	22	0	0
MB-5208	0	0	0	2	22
MB-5428	24	0	0	0	0
MB-5440	0	0	0	0	24
MB-5425	24	0	0	0	0
MB-5298	0	0	0	0	24
MB-5334	23	1	0	0	0
MB-5326	23	0	0	1	0
MB-4059	23	0	0	1	0
MB-6230	24	0	0	0	0
MB-6150	18	6	0	0	0
MB-6014	8	0	0	16	0
MB-6145	0	24	0	0	0
MB-6012	23	1	0	0	0
MB-6024	24	0	0	0	0
MB-6124	24	0	0	0	0
MB-6171	24	0	0	0	0
MB-6060	0	24	0	0	0
MB-6008	0	24	0	0	0
MB-6036	0	0	1	0	23
MB-6144	0	0	0	0	24
MB-5346	0	0	0	0	24
MB-5373	15	9	0	0	0
MB-6178	0	0	0	0	24
MB-6063	4	0	12	8	0
MB-6020	5	18	0	1	0
MB-6062	0	0	1	1	22
MB-6069	24	0	0	0	0
MB-6141	8	16	0	0	0
MB-6118	24	0	0	0	0
MB-6065	24	0	0	0	0
MB-6006	22	2	0	0	0
MB-6048	15	7	0	2	0
MB-6116	0	24	0	0	0
MB-4310	15	7	2	0	0
MB-4300	8	0	16	0	0
MB-4298	11	12	1	0	0
MB-4417	0	0	0	0	24
MB-4079	3	13	8	0	0
MB-4317	1	8	15	0	0
MB-4350	1	0	17	2	4
MB-4332	0	0	0	1	23
MB-4324	2	22	0	0	0
MB-4306	24	0	0	0	0
MB-7226	0	24	0	0	0
MB-7205	0	0	0	0	24
MB-7160	3	4	15	0	2
MB-7159	0	0	0	0	24
MB-7167	16	8	0	0	0
MB-7207	0	2	22	0	0
MB-7241	23	1	0	0	0
MB-7236	23	1	0	0	0
MB-7168	24	0	0	0	0
MB-7162	24	0	0	0	0
MB-7235	23	1	0	0	0
MB-4331	0	24	0	0	0
MB-4353	4	20	0	0	0
MB-4354	7	0	17	0	0
MB-4328	20	4	0	0	0
MB-4348	1	10	13	0	0
MB-6030	24	0	0	0	0
MB-6133	22	2	0	0	0
MB-6083	24	0	0	0	0
MB-6026	0	24	0	0	0
MB-6168	24	0	0	0	0
MB-6101	13	1	2	8	0
MB-6156	2	16	6	0	0
MB-6051	24	0	0	0	0
MB-6182	0	2	22	0	0
MB-6080	3	20	1	0	0
MB-6143	0	0	0	0	24
MB-6164	12	12	0	0	0
MB-0551	0	0	0	24	0
MB-0391	4	0	16	4	0
MB-0367	20	0	0	4	0
MB-5171	6	0	0	18	0
MB-5199	4	0	16	1	3
MB-5177	0	24	0	0	0
MB-5178	22	1	0	1	0
MB-5280	24	0	0	0	0
MB-5148	13	0	0	10	1
MB-4342	23	0	0	1	0
MB-5225	0	0	0	0	24
MB-4024	0	0	0	0	24
MB-6314	0	21	3	0	0
MB-6257	6	18	0	0	0
MB-6358	2	6	16	0	0
MB-6242	0	0	0	0	24
MB-6237	0	0	0	0	24
MB-6183	0	24	0	0	0
MB-6254	22	2	0	0	0
MB-6231	22	1	0	1	0
MB-6204	20	0	0	4	0
MB-6229	24	0	0	0	0
MB-5154	2	0	1	21	0
MB-5175	11	1	2	8	2
MB-5173	0	0	0	0	24
MB-5162	1	0	0	12	11
MB-5164	12	0	1	11	0
MB-7253	1	23	0	0	0
MB-7298	1	23	0	0	0
MB-7299	1	23	0	0	0
MB-7293	24	0	0	0	0
MB-3978	1	2	20	0	1
MB-7288	0	23	1	0	0
MB-2923	0	4	20	0	0
MB-0402	5	0	0	19	0
MB-0381	5	4	15	0	0
MB-0592	19	5	0	0	0
MB-5271	0	24	0	0	0
MB-5235	0	0	0	1	23
MB-4931	1	0	0	0	23
MB-5332	4	13	7	0	0
MB-7045	0	0	23	0	1
MB-7049	0	0	0	1	23
MB-7031	0	0	0	0	24
MB-7061	20	1	0	3	0
MB-7050	20	3	1	0	0
MB-7078	0	2	1	0	21
MB-7054	0	2	7	0	15
MB-7048	17	6	0	1	0
MB-7058	20	0	0	4	0
MB-7056	24	0	0	0	0
MB-7038	0	0	0	0	24
MB-7086	1	23	0	0	0
MB-0177	24	0	0	0	0
MB-0435	1	0	0	10	13
MB-0159	0	1	8	15	0
MB-0399	0	0	24	0	0
MB-0388	20	0	0	4	0
MB-0351	24	0	0	0	0
MB-0615	1	0	2	20	1
MB-0265	0	0	1	18	5
MB-0116	24	0	0	0	0
MB-0472	7	17	0	0	0
MB-0330	6	3	4	11	0
MB-0191	0	0	3	0	21
MB-0231	24	0	0	0	0
MB-0558	0	0	0	0	24
MB-0393	4	3	0	17	0
MB-0553	23	1	0	0	0
MB-0587	23	1	0	0	0
MB-0611	22	2	0	0	0
MB-0640	24	0	0	0	0
MB-0114	24	0	0	0	0
MB-0222	23	0	0	1	0
MB-0284	0	0	0	0	24
MB-0459	4	19	1	0	0
MB-0128	21	0	0	3	0
MB-0639	0	0	0	0	24
MB-0318	0	0	0	21	3
MB-0417	24	0	0	0	0
MB-6238	24	0	0	0	0
MB-6286	24	0	0	0	0
MB-6328	18	6	0	0	0
MB-6284	2	22	0	0	0
MB-6363	8	1	13	1	1
MB-6224	1	0	23	0	0
MB-6297	24	0	0	0	0
MB-6239	24	0	0	0	0
MB-6208	20	0	1	3	0
MB-6273	24	0	0	0	0
MB-6344	1	23	0	0	0
MB-6312	1	23	0	0	0
MB-6212	24	0	0	0	0
MB-6302	0	24	0	0	0
MB-6327	13	11	0	0	0
MB-6287	0	24	0	0	0
MB-6213	24	0	0	0	0
MB-6251	0	0	0	0	24
MB-0489	1	0	0	17	6
MB-0335	20	4	0	0	0
MB-0407	20	0	0	4	0
MB-0876	2	0	0	18	4
MB-0342	1	0	0	23	0
MB-7289	0	0	0	24	0
MB-3253	0	24	0	0	0
MB-7291	0	2	15	0	7
MB-7243	24	0	0	0	0
MB-3466	0	22	2	0	0
MB-7286	1	23	0	0	0
MB-7292	0	24	0	0	0
MB-7275	5	13	6	0	0
MB-7249	23	0	0	1	0
MB-7295	24	0	0	0	0
MB-7297	1	23	0	0	0
MB-7294	9	15	0	0	0
MB-7296	0	24	0	0	0
MB-3402	4	20	0	0	0
MB-5113	24	0	0	0	0
MB-5450	0	0	0	0	24
MB-7032	24	0	0	0	0
MB-7037	24	0	0	0	0
MB-7040	24	0	0	0	0
MB-7020	0	0	22	0	2
MB-7042	2	22	0	0	0
MB-7043	24	0	0	0	0
MB-7028	2	22	0	0	0
MB-7029	23	1	0	0	0
MB-7027	0	1	12	0	11
MB-7060	24	0	0	0	0
MB-7034	24	0	0	0	0
MB-5191	23	0	0	1	0
MB-5214	8	0	0	16	0
MB-5204	24	0	0	0	0
MB-5155	11	0	1	12	0
MB-5190	1	0	6	11	6
MB-5614	23	0	0	1	0
MB-5592	2	22	0	0	0
MB-0437	1	23	0	0	0
MB-0028	1	23	0	0	0
MB-0309	24	0	0	0	0
MB-0100	0	0	0	0	24
MB-5648	24	0	0	0	0
MB-5572	0	0	0	0	24
MB-5655	0	0	0	0	24
MB-5577	3	10	11	0	0
MB-5585	24	0	0	0	0
MB-5620	24	0	0	0	0
MB-5652	1	0	0	23	0
MB-0537	0	0	0	24	0
MB-0544	21	3	0	0	0
MB-0468	24	0	0	0	0
MB-0333	0	0	1	0	23
MB-0205	4	0	0	20	0
MB-0233	24	0	0	0	0
MB-0210	1	1	4	3	15
MB-0200	0	0	0	0	24
MB-0244	24	0	0	0	0
MB-5588	10	1	0	12	1
MB-5628	0	24	0	0	0
MB-5633	0	0	2	0	22
MB-0169	3	0	0	21	0
MB-0253	23	0	0	1	0
MB-0226	24	0	0	0	0
MB-0278	0	0	0	0	24
MB-0266	24	0	0	0	0
MB-0577	2	20	2	0	0
MB-0156	0	0	0	23	1
MB-0531	2	0	0	22	0
MB-0245	24	0	0	0	0
MB-5641	0	24	0	0	0
MB-5640	23	0	0	1	0
MB-0534	0	0	0	24	0
MB-0230	0	1	14	7	2
MB-0433	16	0	0	8	0
MB-0109	0	21	2	1	0
MB-0304	0	23	1	0	0
MB-0369	3	21	0	0	0
MB-0627	0	0	18	1	5
MB-0492	6	18	0	0	0
MB-0147	20	3	0	1	0
MB-0442	19	0	0	5	0
MB-0111	24	0	0	0	0
MB-0634	0	0	0	23	1
MB-0329	12	7	0	5	0
MB-0280	23	0	0	1	0
MB-0490	24	0	0	0	0
MB-0885	1	0	0	19	4
MB-0178	0	24	0	0	0
MB-0242	23	1	0	0	0
MB-5624	0	0	0	0	24
MB-5593	1	0	23	0	0
MB-4010	2	21	1	0	0
MB-5605	9	15	0	0	0
MB-5636	0	24	0	0	0
MB-4529	24	0	0	0	0
MB-5566	0	0	0	0	24
MB-0268	3	21	0	0	0
MB-0160	0	0	0	24	0
MB-0275	10	0	0	14	0
MB-0127	7	0	0	13	4
MB-0045	0	0	0	12	12
MB-0414	0	0	0	0	24
MB-0259	0	0	0	0	24
MB-0396	0	0	0	0	24
MB-0874	0	0	0	0	24
MB-0179	1	0	0	22	1
MB-0526	0	24	0	0	0
MB-0586	24	0	0	0	0
MB-0508	21	2	0	1	0
MB-0288	20	0	0	4	0
MB-0269	1	0	0	4	19
MB-0582	0	0	0	1	23
MB-0901	0	0	0	0	24
MB-0000	0	0	0	24	0
MB-0535	24	0	0	0	0
MB-0469	1	22	0	1	0
MB-0478	13	0	0	11	0
MB-0547	21	3	0	0	0
MB-0499	0	0	0	17	7
MB-0170	24	0	0	0	0
MB-0403	0	0	0	21	3
MB-0464	0	4	11	2	7
MB-0421	0	23	1	0	0
MB-0623	24	0	0	0	0
MB-0241	0	6	15	0	3
MB-0163	0	0	0	0	24
MB-0149	0	0	0	0	24
MB-0153	0	1	1	8	14
MB-0350	0	0	0	0	24
MB-0512	24	0	0	0	0
MB-0020	2	0	1	21	0
MB-0046	16	8	0	0	0
MB-0134	17	7	0	0	0
MB-0495	2	0	9	11	2
MB-0470	2	0	1	10	11
MB-0872	23	0	0	1	0
MB-0661	24	0	0	0	0
MB-0339	24	0	0	0	0
MB-0264	24	0	0	0	0
MB-0175	22	0	1	1	0
MB-0303	0	0	0	0	24
MB-0172	24	0	0	0	0
MB-0125	24	0	0	0	0
MB-0340	0	2	4	0	18
MB-0234	4	20	0	0	0
MB-0487	1	0	0	23	0
MB-0305	23	0	0	1	0
MB-0390	0	1	22	0	1
MB-0502	1	0	2	6	15
MB-0663	0	0	22	0	2
MB-0130	23	0	0	1	0
MB-0289	0	0	0	9	15
MB-0129	0	0	19	0	5
MB-0343	23	0	0	1	0
MB-0458	1	0	0	23	0
MB-0570	1	23	0	0	0
MB-0281	0	0	0	24	0
MB-0488	1	0	1	16	6
MB-0655	22	0	0	2	0
MB-0235	24	0	0	0	0
MB-0484	13	8	3	0	0
MB-0436	0	0	14	1	9
MB-0299	0	0	0	0	24
MB-0877	0	24	0	0	0
MB-0097	23	1	0	0	0
MB-0897	24	0	0	0	0
MB-0095	0	24	0	0	0
MB-0227	24	0	0	0	0
MB-0353	24	0	0	0	0
MB-0522	7	0	12	5	0
MB-0543	0	7	14	0	3
MB-0196	9	2	1	11	1
MB-0646	4	20	0	0	0
MB-0293	0	0	0	24	0
MB-0552	2	1	18	3	0
MB-0260	24	0	0	0	0
MB-0326	23	0	0	1	0
MB-0256	24	0	0	0	0
MB-0539	1	1	10	9	3
MB-0626	0	24	0	0	0
MB-0355	23	1	0	0	0
MB-0211	1	0	11	3	9
MB-0124	23	0	0	1	0
MB-0510	24	0	0	0	0
MB-0365	1	11	12	0	0
MB-0290	24	0	0	0	0
MB-0113	4	0	19	0	1
MB-0620	0	0	0	24	0
MB-0282	11	0	0	13	0
MB-0228	7	0	0	17	0
MB-0578	4	0	0	20	0
MB-0479	2	0	22	0	0
MB-0263	21	0	0	3	0
MB-0509	2	22	0	0	0
MB-0110	6	0	0	17	1
MB-0279	14	0	0	10	0
MB-0168	16	0	0	8	0
MB-0588	1	0	1	22	0
MB-0462	3	2	15	1	3
MB-0262	0	24	0	0	0
MB-0907	5	0	0	19	0
MB-0554	24	0	0	0	0
MB-0418	1	23	0	0	0
MB-0193	22	2	0	0	0
MB-0652	13	1	9	1	0
MB-0638	13	0	0	11	0
MB-0188	0	13	11	0	0
MB-0617	1	0	0	20	3
MB-7225	0	0	0	0	24
MB-7141	24	0	0	0	0
MB-7234	15	9	0	0	0
MB-7089	1	0	0	1	22
MB-7030	0	0	0	6	18
MB-7004	23	1	0	0	0
MB-7119	0	0	1	0	23
MB-7263	1	23	0	0	0
MB-7012	0	0	0	0	24
MB-0174	0	0	0	0	24
MB-7182	0	12	12	0	0
MB-7039	8	0	0	13	3
MB-3797	23	1	0	0	0
MB-7112	0	23	0	1	0
MB-0308	20	0	0	4	0
MB-7230	21	3	0	0	0
MB-5452	24	0	0	0	0
MB-6195	24	0	0	0	0
MB-6317	1	23	0	0	0
MB-5460	8	8	0	5	3
MB-5464	24	0	0	0	0
MB-5552	1	23	0	0	0
MB-5547	0	0	0	0	24
MB-6189	0	24	0	0	0
MB-6122	4	3	5	10	2
MB-6192	0	24	0	0	0
MB-4820	24	0	0	0	0
MB-5527	1	1	16	0	6
MB-5167	1	23	0	0	0
MB-5465	0	0	0	0	24
MB-5453	0	0	0	24	0
MB-5471	24	0	0	0	0
MB-5127	5	19	0	0	0
MB-4313	22	0	1	1	0
MB-4823	0	1	21	2	0

## Sheet: Label ROCK PAM50
	Luminal A	Luminal B	Her2-enriched	Normal-like	Basal
	X1	X2	X3	X4	X5
GSM107072	21	1	1	1	0
GSM107073	1	23	0	0	0
GSM107075	18	0	1	5	0
GSM107076	18	5	1	0	0
GSM107077	0	24	0	0	0
GSM107078	23	1	0	0	0
GSM107079	20	0	1	3	0
GSM107080	0	1	0	0	23
GSM107081	7	0	1	16	0
GSM107082	0	0	0	1	23
GSM107083	23	0	1	0	0
GSM107084	4	19	1	0	0
GSM107085	0	24	0	0	0
GSM107086	22	0	1	1	0
GSM107087	6	17	1	0	0
GSM107088	4	20	0	0	0
GSM107089	16	7	1	0	0
GSM107090	2	1	0	4	17
GSM107091	24	0	0	0	0
GSM107092	23	1	0	0	0
GSM107093	6	14	1	3	0
GSM107094	2	20	2	0	0
GSM107095	22	2	0	0	0
GSM107096	19	1	1	3	0
GSM107097	19	5	0	0	0
GSM107098	20	0	1	3	0
GSM107099	8	15	1	0	0
GSM107100	7	0	1	16	0
GSM107101	0	2	16	1	5
GSM107102	0	3	15	2	4
GSM107103	23	0	1	0	0
GSM107104	20	0	1	3	0
GSM107105	23	0	1	0	0
GSM107106	23	0	1	0	0
GSM107107	0	23	0	0	1
GSM107108	23	0	1	0	0
GSM107109	2	3	16	1	2
GSM107110	6	17	1	0	0
GSM107111	18	0	1	5	0
GSM107112	21	2	1	0	0
GSM107113	1	22	1	0	0
GSM107114	19	0	1	4	0
GSM107115	0	0	0	4	20
GSM107117	21	0	0	3	0
GSM107118	20	0	0	4	0
GSM107119	22	1	1	0	0
GSM107120	16	7	1	0	0
GSM107121	6	16	2	0	0
GSM107122	5	0	0	19	0
GSM107123	0	24	0	0	0
GSM107124	16	0	0	8	0
GSM107125	12	1	11	0	0
GSM107126	21	0	0	3	0
GSM107127	23	0	1	0	0
GSM107128	23	1	0	0	0
GSM107129	0	0	0	1	23
GSM107130	20	0	1	3	0
GSM107131	0	1	4	0	19
GSM107132	21	0	0	3	0
GSM107133	20	3	1	0	0
GSM107134	13	7	4	0	0
GSM107135	3	0	0	21	0
GSM107136	14	0	0	10	0
GSM107137	21	0	0	3	0
GSM107138	18	1	1	4	0
GSM107139	20	0	0	4	0
GSM107141	0	0	0	0	24
GSM107142	23	0	1	0	0
GSM107143	20	0	1	3	0
GSM107144	6	0	4	14	0
GSM107145	19	1	1	3	0
GSM107146	18	1	1	4	0
GSM107147	21	0	0	3	0
GSM107148	24	0	0	0	0
GSM107149	4	20	0	0	0
GSM107150	21	0	0	3	0
GSM107151	1	23	0	0	0
GSM107152	7	16	1	0	0
GSM107153	20	0	1	3	0
GSM107155	17	0	1	6	0
GSM107156	16	0	0	8	0
GSM107157	13	10	1	0	0
GSM107158	5	19	0	0	0
GSM107159	15	0	1	8	0
GSM107160	3	20	1	0	0
GSM107161	24	0	0	0	0
GSM107162	10	13	1	0	0
GSM107163	1	23	0	0	0
GSM107164	20	0	1	3	0
GSM107165	18	0	1	5	0
GSM107166	1	6	3	5	9
GSM107167	17	0	1	6	0
GSM107168	0	24	0	0	0
GSM107169	19	0	0	5	0
GSM107171	19	0	1	4	0
GSM107172	17	0	1	6	0
GSM107173	24	0	0	0	0
GSM107174	20	0	1	3	0
GSM107175	5	0	0	19	0
GSM107176	20	0	0	4	0
GSM107178	1	23	0	0	0
GSM107179	14	10	0	0	0
GSM107180	22	2	0	0	0
GSM107181	20	0	1	3	0
GSM107182	23	0	1	0	0
GSM107184	20	0	1	3	0
GSM107185	18	0	0	6	0
GSM107186	1	0	0	19	4
GSM107187	14	0	1	9	0
GSM107188	19	0	1	4	0
GSM107189	18	0	1	5	0
GSM107190	17	0	0	7	0
GSM107191	0	0	0	1	23
GSM107192	1	23	0	0	0
GSM107194	1	23	0	0	0
GSM107195	0	0	8	2	14
GSM107196	0	0	0	0	24
GSM107197	2	17	5	0	0
GSM107198	0	0	0	0	24
GSM107199	3	21	0	0	0
GSM107200	22	2	0	0	0
GSM107201	6	15	0	3	0
GSM107202	20	4	0	0	0
GSM107203	11	13	0	0	0
GSM107204	1	6	0	1	16
GSM107205	10	0	13	1	0
GSM107206	1	5	18	0	0
GSM107207	19	1	1	3	0
GSM107208	4	13	7	0	0
GSM107209	17	0	1	6	0
GSM107210	11	12	1	0	0
GSM107211	15	8	1	0	0
GSM107212	23	1	0	0	0
GSM107213	19	1	1	3	0
GSM107214	21	0	0	3	0
GSM107215	0	0	0	4	20
GSM107216	20	0	1	3	0
GSM107217	0	2	3	0	19
GSM107218	0	0	0	2	22
GSM107219	4	2	18	0	0
GSM107220	10	13	1	0	0
GSM107221	19	0	1	4	0
GSM107222	9	15	0	0	0
GSM107223	3	0	1	20	0
GSM107224	2	22	0	0	0
GSM107225	17	5	1	1	0
GSM107226	0	24	0	0	0
GSM107227	21	3	0	0	0
GSM107228	0	22	1	0	1
GSM107229	1	3	0	2	18
GSM107230	22	1	1	0	0
GSM107231	5	16	0	2	1
GSM136326	0	1	1	0	22
GSM136327	9	0	1	14	0
GSM136328	11	6	0	7	0
GSM136329	1	0	1	17	5
GSM136330	1	0	0	14	9
GSM136331	0	0	0	1	23
GSM136335	0	0	0	0	24
GSM136337	3	0	0	21	0
GSM136338	1	0	0	0	23
GSM136339	2	2	4	10	6
GSM136340	2	0	0	2	20
GSM136341	1	0	0	19	4
GSM136342	21	3	0	0	0
GSM136343	3	5	0	2	14
GSM136344	17	0	0	7	0
GSM136345	20	4	0	0	0
GSM136346	1	2	0	4	17
GSM136347	5	15	4	0	0
GSM136348	0	20	1	1	2
GSM136349	6	0	0	16	2
GSM136350	12	11	1	0	0
GSM136351	13	5	1	5	0
GSM136352	0	3	3	3	15
GSM136353	0	23	1	0	0
GSM136354	24	0	0	0	0
GSM136355	18	5	1	0	0
GSM136356	0	0	0	18	6
GSM136357	5	0	0	18	1
GSM136358	5	1	2	16	0
GSM136359	21	0	1	2	0
GSM136360	1	1	7	7	8
GSM136361	17	0	1	6	0
GSM136362	14	0	0	10	0
GSM136363	22	1	1	0	0
GSM136364	1	2	0	12	9
GSM136365	1	0	0	9	14
GSM136366	16	2	1	5	0
GSM136367	7	1	0	12	4
GSM136368	0	0	0	1	23
GSM136369	2	0	21	1	0
GSM136370	2	1	0	19	2
GSM136371	0	1	14	5	4
GSM136372	11	0	0	11	2
GSM136373	6	0	1	17	0
GSM136374	0	0	0	0	24
GSM136375	7	0	0	17	0
GSM136376	13	2	0	9	0
GSM136377	1	0	0	0	23
GSM136378	2	1	0	12	9
GSM136379	0	0	0	0	24
GSM136381	14	10	0	0	0
GSM136382	22	0	0	2	0
GSM136383	0	0	0	0	24
GSM136384	5	2	6	2	9
GSM136386	1	3	2	4	14
GSM136387	2	1	0	0	21
GSM136388	23	1	0	0	0
GSM136389	2	0	0	19	3
GSM136390	22	1	0	1	0
GSM136391	3	5	0	2	14
GSM136392	21	1	1	1	0
GSM136393	22	2	0	0	0
GSM136394	1	3	0	3	17
GSM136395	4	18	2	0	0
GSM136396	0	24	0	0	0
GSM136397	23	1	0	0	0
GSM136398	3	20	1	0	0
GSM136399	13	2	1	8	0
GSM136401	0	24	0	0	0
GSM136402	24	0	0	0	0
GSM136403	17	7	0	0	0
GSM136404	2	3	2	9	8
GSM136405	5	1	1	17	0
GSM136406	2	0	7	14	1
GSM136407	19	5	0	0	0
GSM136408	1	0	4	4	15
GSM136409	7	0	1	16	0
GSM136410	17	7	0	0	0
GSM136411	22	2	0	0	0
GSM136412	0	1	0	14	9
GSM136413	1	0	0	21	2
GSM136414	2	22	0	0	0
GSM136415	0	0	0	7	17
GSM136416	0	0	0	1	23
GSM136417	1	2	21	0	0
GSM136418	0	0	0	2	22
GSM136419	0	3	19	0	2
GSM136420	2	8	10	3	1
GSM150794	24	0	0	0	0
GSM150795	0	0	0	24	0
GSM150796	10	4	10	0	0
GSM150797	2	0	0	21	1
GSM150798	2	0	0	22	0
GSM150799	20	0	0	4	0
GSM150800	7	0	0	17	0
GSM150801	6	0	0	18	0
GSM150802	22	2	0	0	0
GSM150803	14	0	0	10	0
GSM150804	7	0	9	5	3
GSM150805	0	0	24	0	0
GSM150943	15	0	1	8	0
GSM150944	13	0	1	10	0
GSM150945	5	19	0	0	0
GSM150946	0	24	0	0	0
GSM150947	23	1	0	0	0
GSM150948	24	0	0	0	0
GSM150949	17	5	1	1	0
GSM150950	0	24	0	0	0
GSM150951	10	13	1	0	0
GSM150952	18	3	0	3	0
GSM150953	21	0	0	3	0
GSM150954	12	0	1	11	0
GSM150955	17	6	1	0	0
GSM150956	1	21	1	1	0
GSM150957	18	3	0	3	0
GSM150958	14	0	1	9	0
GSM150959	17	7	0	0	0
GSM150960	2	22	0	0	0
GSM150961	2	20	0	1	1
GSM150962	5	19	0	0	0
GSM150963	17	0	1	6	0
GSM150964	15	9	0	0	0
GSM150965	13	2	1	8	0
GSM150966	12	10	1	1	0
GSM150967	14	10	0	0	0
GSM150968	20	0	1	3	0
GSM150969	5	19	0	0	0
GSM150970	2	20	1	1	0
GSM150971	1	23	0	0	0
GSM150972	14	9	1	0	0
GSM150973	24	0	0	0	0
GSM150974	23	1	0	0	0
GSM150975	9	15	0	0	0
GSM150976	4	20	0	0	0
GSM150977	5	19	0	0	0
GSM150978	17	0	1	6	0
GSM150979	18	0	1	5	0
GSM150980	20	0	1	3	0
GSM150981	16	6	0	2	0
GSM150982	12	12	0	0	0
GSM150983	1	23	0	0	0
GSM150984	12	10	1	1	0
GSM150985	13	9	1	1	0
GSM150986	16	2	0	5	1
GSM150987	21	2	1	0	0
GSM150988	2	22	0	0	0
GSM150989	17	7	0	0	0
GSM150990	22	2	0	0	0
GSM150991	7	16	1	0	0
GSM150992	15	2	1	6	0
GSM150993	21	3	0	0	0
GSM150994	22	2	0	0	0
GSM150995	14	2	1	7	0
GSM150996	1	23	0	0	0
GSM150997	16	1	4	3	0
GSM150998	12	12	0	0	0
GSM150999	1	20	2	1	0
GSM151000	18	1	1	4	0
GSM151001	9	15	0	0	0
GSM151002	13	11	0	0	0
GSM151003	23	1	0	0	0
GSM151004	8	16	0	0	0
GSM151005	20	1	1	2	0
GSM151006	17	7	0	0	0
GSM151007	24	0	0	0	0
GSM151008	14	4	5	1	0
GSM151009	19	0	1	4	0
GSM151010	16	1	1	6	0
GSM151011	17	7	0	0	0
GSM151012	0	0	0	0	24
GSM151013	14	10	0	0	0
GSM151014	24	0	0	0	0
GSM151015	0	1	23	0	0
GSM151016	8	0	1	15	0
GSM151017	23	0	1	0	0
GSM151018	22	2	0	0	0
GSM151019	1	23	0	0	0
GSM151020	1	23	0	0	0
GSM151021	23	0	1	0	0
GSM151022	15	9	0	0	0
GSM151023	2	22	0	0	0
GSM151024	22	2	0	0	0
GSM151025	22	2	0	0	0
GSM151026	4	20	0	0	0
GSM151027	18	0	1	5	0
GSM151028	23	1	0	0	0
GSM151029	13	11	0	0	0
GSM151030	1	13	9	0	1
GSM151031	0	24	0	0	0
GSM151032	5	3	6	8	2
GSM151033	14	0	0	10	0
GSM151034	16	0	0	8	0
GSM151035	24	0	0	0	0
GSM151036	21	1	2	0	0
GSM151037	2	22	0	0	0
GSM151038	6	18	0	0	0
GSM151039	19	5	0	0	0
GSM151040	0	0	7	5	12
GSM151041	23	1	0	0	0
GSM151042	7	17	0	0	0
GSM151043	19	5	0	0	0
GSM151044	24	0	0	0	0
GSM151045	2	1	17	1	3
GSM151046	1	1	16	2	4
GSM151047	24	0	0	0	0
GSM151048	24	0	0	0	0
GSM151049	0	9	14	0	1
GSM151050	11	13	0	0	0
GSM151051	10	1	3	10	0
GSM151052	22	2	0	0	0
GSM151053	19	0	1	4	0
GSM151054	23	0	1	0	0
GSM151055	24	0	0	0	0
GSM151056	18	6	0	0	0
GSM151057	1	23	0	0	0
GSM151058	17	1	0	6	0
GSM151059	23	1	0	0	0
GSM151060	20	1	0	3	0
GSM151061	0	6	18	0	0
GSM151062	24	0	0	0	0
GSM151063	15	1	1	7	0
GSM151064	2	20	2	0	0
GSM151065	18	6	0	0	0
GSM151066	13	11	0	0	0
GSM151067	9	5	6	3	1
GSM151068	24	0	0	0	0
GSM177885	1	5	9	4	5
GSM177886	0	24	0	0	0
GSM177887	0	0	1	4	19
GSM177888	2	21	0	1	0
GSM177889	3	21	0	0	0
GSM177890	14	0	1	9	0
GSM177891	0	0	0	0	24
GSM177892	14	0	1	9	0
GSM177893	3	21	0	0	0
GSM177894	14	1	2	7	0
GSM177895	9	14	1	0	0
GSM177896	19	2	1	2	0
GSM177897	0	0	0	0	24
GSM177898	4	2	2	16	0
GSM177899	0	0	4	2	18
GSM177900	8	15	1	0	0
GSM177901	7	4	3	4	6
GSM177902	5	2	16	1	0
GSM177903	1	5	8	5	5
GSM177904	22	0	1	1	0
GSM177905	15	1	1	7	0
GSM177906	0	0	2	0	22
GSM177907	15	0	0	9	0
GSM177908	6	17	0	1	0
GSM177909	0	0	1	0	23
GSM177910	10	13	1	0	0
GSM177911	20	0	0	4	0
GSM177913	0	0	0	1	23
GSM177914	19	1	0	4	0
GSM177915	6	16	2	0	0
GSM177916	7	17	0	0	0
GSM177917	5	18	0	0	1
GSM177918	3	0	14	7	0
GSM177919	23	1	0	0	0
GSM177920	1	21	1	1	0
GSM177921	20	0	1	3	0
GSM177922	15	2	1	6	0
GSM177923	0	0	0	2	22
GSM177924	18	4	1	1	0
GSM177925	0	0	0	1	23
GSM177926	0	24	0	0	0
GSM177927	1	5	17	1	0
GSM177928	9	12	2	1	0
GSM177929	0	22	1	1	0
GSM177930	14	0	0	10	0
GSM177931	16	0	1	7	0
GSM177932	18	1	1	4	0
GSM177933	2	20	0	2	0
GSM177934	0	23	1	0	0
GSM177935	0	0	3	1	20
GSM177936	23	0	0	1	0
GSM177937	0	0	5	1	18
GSM177938	18	0	1	5	0
GSM177939	4	2	10	2	6
GSM177940	22	2	0	0	0
GSM177941	18	4	0	2	0
GSM177942	0	24	0	0	0
GSM177943	0	1	0	0	23
GSM177944	0	3	3	0	18
GSM177945	22	1	0	0	1
GSM177946	4	17	1	2	0
GSM177947	18	4	0	2	0
GSM177948	22	0	0	2	0
GSM177950	17	7	0	0	0
GSM177952	11	13	0	0	0
GSM177953	14	8	1	1	0
GSM177954	0	0	0	0	24
GSM177955	22	0	1	1	0
GSM177956	0	1	0	0	23
GSM177957	12	1	1	10	0
GSM177958	1	21	1	1	0
GSM177959	2	5	12	1	4
GSM177960	1	23	0	0	0
GSM177961	15	0	1	8	0
GSM177963	0	0	0	5	19
GSM177965	19	0	1	4	0
GSM177966	0	0	0	0	24
GSM177967	23	1	0	0	0
GSM177968	4	5	1	5	9
GSM177969	16	0	1	7	0
GSM177970	0	0	0	1	23
GSM177971	14	8	1	1	0
GSM177972	8	0	1	15	0
GSM177973	1	23	0	0	0
GSM177974	19	2	0	3	0
GSM177975	0	0	0	0	24
GSM177976	15	1	1	7	0
GSM177977	0	6	18	0	0
GSM177978	0	2	2	0	20
GSM177979	1	2	4	0	17
GSM177980	0	2	0	0	22
GSM177981	6	6	11	1	0
GSM177982	15	1	1	7	0
GSM177983	3	19	2	0	0
GSM177984	24	0	0	0	0
GSM177985	0	1	0	5	18
GSM177986	7	15	1	1	0
GSM177988	0	7	2	3	12
GSM177989	15	0	1	8	0
GSM177990	16	8	0	0	0
GSM177991	6	0	0	18	0
GSM177992	20	0	1	3	0
GSM177993	0	0	0	11	13
GSM177995	14	6	1	3	0
GSM177996	15	0	0	9	0
GSM177997	11	7	2	4	0
GSM177998	18	1	1	4	0
GSM177999	0	0	0	3	21
GSM178000	13	4	1	6	0
GSM178001	0	0	0	0	24
GSM178002	23	0	1	0	0
GSM178003	2	1	0	4	17
GSM178004	15	8	1	0	0
GSM178005	5	16	1	2	0
GSM178006	0	2	11	2	9
GSM178007	13	6	1	4	0
GSM178008	14	9	1	0	0
GSM178009	0	1	6	3	14
GSM178010	0	3	20	1	0
GSM178011	0	0	0	1	23
GSM178012	0	0	0	0	24
GSM178013	0	0	0	0	24
GSM178014	12	10	1	1	0
GSM178015	17	0	0	7	0
GSM178016	18	1	1	4	0
GSM178017	0	17	7	0	0
GSM178018	9	13	1	1	0
GSM178019	20	0	1	3	0
GSM178020	1	16	6	1	0
GSM178021	0	8	1	1	14
GSM178022	22	0	1	1	0
GSM178024	20	0	0	4	0
GSM178025	2	21	1	0	0
GSM178026	2	22	0	0	0
GSM178027	18	1	1	4	0
GSM178028	2	2	12	3	5
GSM178029	11	0	1	12	0
GSM178030	20	0	1	3	0
GSM178031	19	4	1	0	0
GSM178032	20	0	1	3	0
GSM178034	0	0	1	0	23
GSM178035	0	0	0	1	23
GSM178036	17	3	1	3	0
GSM178037	20	3	1	0	0
GSM178038	1	23	0	0	0
GSM178039	15	0	1	8	0
GSM178040	22	1	1	0	0
GSM178041	18	1	1	4	0
GSM178042	22	1	1	0	0
GSM178043	15	0	0	9	0
GSM178044	16	0	1	7	0
GSM178045	18	0	1	5	0
GSM178046	10	12	1	1	0
GSM178047	20	0	1	3	0
GSM178049	22	0	1	1	0
GSM178050	0	22	1	0	1
GSM178051	13	0	0	11	0
GSM178052	0	13	11	0	0
GSM178053	10	10	1	3	0
GSM178054	16	0	0	8	0
GSM178055	0	3	2	1	18
GSM178056	10	14	0	0	0
GSM178057	2	22	0	0	0
GSM178058	0	19	5	0	0
GSM178059	0	1	0	2	21
GSM178060	0	24	0	0	0
GSM178061	18	2	1	3	0
GSM178062	17	1	1	5	0
GSM178063	0	4	15	1	4
GSM178064	13	10	0	0	1
GSM178065	0	7	16	1	0
GSM178066	3	9	12	0	0
GSM178068	0	24	0	0	0
GSM178069	1	23	0	0	0
GSM178070	20	4	0	0	0
GSM178071	19	1	1	3	0
GSM178072	15	1	1	7	0
GSM178073	0	7	16	1	0
GSM178074	11	12	1	0	0
GSM178075	0	0	0	1	23
GSM178076	19	1	0	4	0
GSM178077	13	3	1	7	0
GSM178078	0	0	0	0	24
GSM178079	0	0	0	0	24
GSM178080	0	24	0	0	0
GSM178081	11	1	0	12	0
GSM178082	1	0	0	3	20
GSM26804	0	24	0	0	0
GSM26867	0	24	0	0	0
GSM26868	1	23	0	0	0
GSM26869	24	0	0	0	0
GSM26871	0	0	0	1	23
GSM26872	6	18	0	0	0
GSM26873	20	1	0	3	0
GSM26874	12	12	0	0	0
GSM26875	0	24	0	0	0
GSM26876	4	19	0	1	0
GSM26877	13	11	0	0	0
GSM26878	0	9	14	0	1
GSM26879	1	23	0	0	0
GSM26880	0	0	3	3	18
GSM26881	0	23	0	1	0
GSM26882	2	1	0	0	21
GSM26883	0	6	18	0	0
GSM26884	2	0	0	0	22
GSM26885	21	2	0	1	0
GSM26887	0	15	8	0	1
GSM26888	1	1	0	0	22
GSM26889	0	0	0	1	23
GSM26890	2	22	0	0	0
GSM26891	0	24	0	0	0
GSM26892	1	10	0	0	13
GSM26893	1	0	0	0	23
GSM26894	3	21	0	0	0
GSM26895	2	0	0	0	22
GSM26896	12	6	0	6	0
GSM26897	5	19	0	0	0
GSM26898	2	0	0	0	22
GSM26900	1	2	11	2	8
GSM26901	0	24	0	0	0
GSM26902	2	0	0	0	22
GSM26903	2	1	20	0	1
GSM26904	0	24	0	0	0
GSM26905	1	2	0	0	21
GSM26906	0	0	1	1	22
GSM26907	3	21	0	0	0
GSM26908	0	2	3	1	18
GSM26909	14	10	0	0	0
GSM26910	1	4	11	4	4
GSM26911	0	24	0	0	0
GSM26912	1	4	0	3	16
GSM26913	24	0	0	0	0
GSM26914	0	24	0	0	0
GSM282373	0	8	16	0	0
GSM282374	7	17	0	0	0
GSM282375	15	0	1	8	0
GSM282376	22	2	0	0	0
GSM282377	0	24	0	0	0
GSM282378	20	2	1	1	0
GSM282379	1	23	0	0	0
GSM282380	13	7	1	3	0
GSM282381	24	0	0	0	0
GSM282382	24	0	0	0	0
GSM282383	18	0	1	5	0
GSM282384	23	1	0	0	0
GSM282385	0	0	0	1	23
GSM282386	7	17	0	0	0
GSM282387	17	1	1	5	0
GSM282388	23	0	0	1	0
GSM282389	20	4	0	0	0
GSM282390	24	0	0	0	0
GSM282391	19	2	0	3	0
GSM282392	0	24	0	0	0
GSM282393	12	0	0	12	0
GSM282394	3	21	0	0	0
GSM282395	24	0	0	0	0
GSM282396	0	18	6	0	0
GSM282397	15	9	0	0	0
GSM282399	3	21	0	0	0
GSM282400	18	2	0	4	0
GSM282401	5	0	0	19	0
GSM282402	24	0	0	0	0
GSM282403	0	24	0	0	0
GSM282404	22	1	0	1	0
GSM282405	16	8	0	0	0
GSM282406	20	3	0	1	0
GSM282407	24	0	0	0	0
GSM282408	23	1	0	0	0
GSM282410	1	13	10	0	0
GSM282411	24	0	0	0	0
GSM282412	23	0	0	1	0
GSM282413	0	0	0	1	23
GSM282414	21	3	0	0	0
GSM282415	13	11	0	0	0
GSM282416	23	1	0	0	0
GSM282417	21	3	0	0	0
GSM282420	9	0	0	15	0
GSM282421	24	0	0	0	0
GSM282422	23	0	1	0	0
GSM282423	23	0	0	1	0
GSM282424	16	8	0	0	0
GSM282425	24	0	0	0	0
GSM282426	21	3	0	0	0
GSM282427	3	3	0	3	15
GSM282428	1	23	0	0	0
GSM282430	14	10	0	0	0
GSM282431	24	0	0	0	0
GSM282432	24	0	0	0	0
GSM282433	21	0	1	2	0
GSM282434	13	0	1	10	0
GSM282435	1	2	0	3	18
GSM282436	18	4	0	2	0
GSM282437	21	3	0	0	0
GSM282438	24	0	0	0	0
GSM282439	24	0	0	0	0
GSM282440	0	0	0	0	24
GSM282441	21	3	0	0	0
GSM282442	24	0	0	0	0
GSM282443	24	0	0	0	0
GSM282444	23	1	0	0	0
GSM282445	22	0	0	2	0
GSM282446	0	2	0	6	16
GSM282447	17	0	1	6	0
GSM282448	14	1	1	8	0
GSM282449	24	0	0	0	0
GSM282450	0	24	0	0	0
GSM282451	24	0	0	0	0
GSM282452	24	0	0	0	0
GSM282453	12	2	0	10	0
GSM282454	0	0	0	0	24
GSM282455	22	2	0	0	0
GSM282456	23	0	0	1	0
GSM282457	4	3	10	2	5
GSM282458	24	0	0	0	0
GSM282459	12	0	0	12	0
GSM282461	18	3	3	0	0
GSM282462	21	2	0	1	0
GSM282463	24	0	0	0	0
GSM282464	0	0	0	2	22
GSM282465	0	0	0	2	22
GSM282466	24	0	0	0	0
GSM282467	16	0	0	8	0
GSM282468	17	4	3	0	0
GSM282469	17	0	1	6	0
GSM282470	5	0	1	18	0
GSM282471	0	0	0	0	24
GSM282472	1	23	0	0	0
GSM282473	3	21	0	0	0
GSM282474	1	7	0	2	14
GSM282475	5	19	0	0	0
GSM282476	5	19	0	0	0
GSM282477	1	7	16	0	0
GSM282478	2	4	1	7	10
GSM282479	21	3	0	0	0
GSM282480	2	22	0	0	0
GSM282481	16	8	0	0	0
GSM282482	1	1	0	5	17
GSM282483	3	21	0	0	0
GSM282484	2	22	0	0	0
GSM282485	23	1	0	0	0
GSM282486	21	2	0	1	0
GSM282487	20	4	0	0	0
GSM282488	6	18	0	0	0
GSM282489	2	5	17	0	0
GSM282490	19	1	1	3	0
GSM282491	3	21	0	0	0
GSM282492	24	0	0	0	0
GSM282493	1	2	12	2	7
GSM282494	19	0	0	5	0
GSM282495	5	19	0	0	0
GSM282496	24	0	0	0	0
GSM282497	1	4	1	0	18
GSM282498	24	0	0	0	0
GSM282499	22	2	0	0	0
GSM282500	16	2	0	6	0
GSM282501	19	1	0	4	0
GSM282502	1	9	9	0	5
GSM282503	19	0	1	4	0
GSM282504	23	1	0	0	0
GSM282506	19	5	0	0	0
GSM282507	1	23	0	0	0
GSM282508	0	0	1	0	23
GSM282509	23	1	0	0	0
GSM282510	5	19	0	0	0
GSM282511	1	6	0	1	16
GSM282512	18	1	0	5	0
GSM282513	12	12	0	0	0
GSM282514	20	0	0	4	0
GSM282515	19	5	0	0	0
GSM282516	18	5	1	0	0
GSM282517	21	0	0	3	0
GSM282519	10	14	0	0	0
GSM282520	4	20	0	0	0
GSM282521	15	0	0	9	0
GSM282522	17	7	0	0	0
GSM282523	17	3	1	3	0
GSM282524	21	3	0	0	0
GSM282525	0	23	1	0	0
GSM282526	9	12	0	3	0
GSM282527	13	11	0	0	0
GSM282528	0	0	0	0	24
GSM282529	24	0	0	0	0
GSM282530	21	3	0	0	0
GSM282531	22	1	0	1	0
GSM282532	21	2	0	1	0
GSM282533	24	0	0	0	0
GSM282534	22	0	0	2	0
GSM282536	24	0	0	0	0
GSM282537	4	20	0	0	0
GSM282538	0	24	0	0	0
GSM282539	1	23	0	0	0
GSM282540	15	0	0	9	0
GSM282541	24	0	0	0	0
GSM282542	23	1	0	0	0
GSM282543	7	17	0	0	0
GSM282545	1	23	0	0	0
GSM282546	23	1	0	0	0
GSM282547	16	0	0	8	0
GSM282548	23	1	0	0	0
GSM282549	23	1	0	0	0
GSM282550	22	0	0	2	0
GSM282551	1	0	0	2	21
GSM282552	6	18	0	0	0
GSM282553	8	16	0	0	0
GSM282556	0	24	0	0	0
GSM282557	18	6	0	0	0
GSM282558	10	11	0	3	0
GSM282559	13	0	0	11	0
GSM282560	23	0	0	1	0
GSM282561	0	24	0	0	0
GSM282562	24	0	0	0	0
GSM282563	14	1	1	8	0
GSM282564	23	0	0	1	0
GSM282565	1	0	0	0	23
GSM282566	23	0	1	0	0
GSM282567	2	22	0	0	0
GSM282568	0	24	0	0	0
GSM282569	0	1	3	0	20
GSM282570	0	24	0	0	0
GSM282572	9	12	0	3	0
GSM36777	23	1	0	0	0
GSM36778	11	13	0	0	0
GSM36779	22	1	0	1	0
GSM36780	10	2	10	1	1
GSM36781	0	2	22	0	0
GSM36782	23	1	0	0	0
GSM36783	23	1	0	0	0
GSM36784	20	3	0	1	0
GSM36785	1	23	0	0	0
GSM36788	0	0	3	1	20
GSM36789	3	21	0	0	0
GSM36790	24	0	0	0	0
GSM36791	23	1	0	0	0
GSM36792	3	21	0	0	0
GSM36793	3	0	0	20	1
GSM36796	20	3	0	1	0
GSM36797	0	0	0	1	23
GSM36798	0	0	0	1	23
GSM36799	10	13	1	0	0
GSM36800	1	23	0	0	0
GSM36801	3	21	0	0	0
GSM36803	10	14	0	0	0
GSM36804	24	0	0	0	0
GSM36805	0	24	0	0	0
GSM36806	24	0	0	0	0
GSM36807	12	0	1	11	0
GSM36808	11	1	2	10	0
GSM36809	0	0	2	3	19
GSM36810	0	24	0	0	0
GSM36811	22	1	0	1	0
GSM36813	17	5	0	2	0
GSM36814	16	4	3	1	0
GSM36816	6	7	4	3	4
GSM36817	1	2	0	10	11
GSM36818	1	23	0	0	0
GSM36819	22	1	0	1	0
GSM36820	2	22	0	0	0
GSM36821	6	18	0	0	0
GSM36822	0	0	0	1	23
GSM36824	0	0	0	2	22
GSM36825	24	0	0	0	0
GSM36826	17	7	0	0	0
GSM36827	0	0	0	1	23
GSM36828	0	0	0	0	24
GSM36829	1	21	1	1	0
GSM36830	15	9	0	0	0
GSM36831	24	0	0	0	0
GSM36832	23	1	0	0	0
GSM36833	0	2	21	0	1
GSM36834	0	24	0	0	0
GSM36835	3	1	1	2	17
GSM36836	22	2	0	0	0
GSM36837	4	20	0	0	0
GSM36838	12	12	0	0	0
GSM36839	24	0	0	0	0
GSM36841	2	22	0	0	0
GSM36842	16	5	0	3	0
GSM36843	15	9	0	0	0
GSM36844	2	22	0	0	0
GSM36845	24	0	0	0	0
GSM36846	1	0	0	0	23
GSM36847	1	0	0	0	23
GSM36848	21	0	0	3	0
GSM36849	22	2	0	0	0
GSM36850	17	7	0	0	0
GSM36851	10	1	2	11	0
GSM36852	23	1	0	0	0
GSM36853	17	7	0	0	0
GSM36854	18	6	0	0	0
GSM36855	0	0	0	0	24
GSM36856	5	19	0	0	0
GSM36857	8	16	0	0	0
GSM36858	1	20	3	0	0
GSM36859	24	0	0	0	0
GSM36860	0	24	0	0	0
GSM36861	22	1	0	1	0
GSM36862	0	0	0	1	23
GSM36863	10	14	0	0	0
GSM36864	0	24	0	0	0
GSM36865	0	0	0	1	23
GSM36866	23	1	0	0	0
GSM36867	9	15	0	0	0
GSM36868	24	0	0	0	0
GSM36870	0	24	0	0	0
GSM36871	23	1	0	0	0
GSM36872	5	19	0	0	0
GSM36873	5	19	0	0	0
GSM36874	17	3	0	4	0
GSM36875	0	0	1	0	23
GSM36876	0	0	0	0	24
GSM36877	0	19	5	0	0
GSM36878	1	23	0	0	0
GSM36879	13	0	9	2	0
GSM36880	21	0	1	2	0
GSM36881	0	24	0	0	0
GSM36882	16	2	0	6	0
GSM36883	18	2	0	4	0
GSM36884	2	19	3	0	0
GSM36885	13	0	1	10	0
GSM36886	5	11	6	2	0
GSM36887	23	1	0	0	0
GSM36888	13	11	0	0	0
GSM36889	5	19	0	0	0
GSM36890	13	0	3	8	0
GSM36891	1	0	0	1	22
GSM36892	12	12	0	0	0
GSM36893	13	11	0	0	0
GSM36894	18	0	1	5	0
GSM36895	18	6	0	0	0
GSM36896	20	4	0	0	0
GSM36897	19	2	0	3	0
GSM36898	18	0	1	5	0
GSM36899	0	24	0	0	0
GSM36901	0	0	0	0	24
GSM36902	4	1	0	16	3
GSM36903	0	24	0	0	0
GSM36904	16	2	6	0	0
GSM36905	2	2	2	8	10
GSM36906	0	8	12	1	3
GSM36907	20	4	0	0	0
GSM36908	0	24	0	0	0
GSM36909	5	0	0	17	2
GSM36910	23	1	0	0	0
GSM36911	8	16	0	0	0
GSM36912	0	0	0	0	24
GSM36914	21	2	0	1	0
GSM36915	11	1	3	9	0
GSM36916	20	0	0	4	0
GSM36917	20	3	0	1	0
GSM36918	2	0	1	14	7
GSM36919	20	4	0	0	0
GSM36920	13	11	0	0	0
GSM36921	9	15	0	0	0
GSM36922	1	23	0	0	0
GSM36923	1	0	1	5	17
GSM36924	4	20	0	0	0
GSM36925	24	0	0	0	0
GSM36926	3	3	18	0	0
GSM36927	0	0	0	0	24
GSM36928	22	2	0	0	0
GSM36930	2	22	0	0	0
GSM36931	0	0	0	2	22
GSM36932	20	0	0	4	0
GSM36933	8	15	1	0	0
GSM36934	4	16	3	1	0
GSM36935	0	0	0	2	22
GSM36937	0	0	0	0	24
GSM36938	0	24	0	0	0
GSM36939	3	21	0	0	0
GSM36940	0	0	0	0	24
GSM36941	0	0	0	0	24
GSM36942	23	1	0	0	0
GSM36944	18	1	0	5	0
GSM36945	23	1	0	0	0
GSM36946	1	23	0	0	0
GSM36947	1	23	0	0	0
GSM36948	0	24	0	0	0
GSM36949	1	2	4	1	16
GSM36950	22	2	0	0	0
GSM36951	7	17	0	0	0
GSM36952	0	0	0	1	23
GSM36953	14	4	5	1	0
GSM36954	0	24	0	0	0
GSM36955	1	4	17	1	1
GSM36957	23	1	0	0	0
GSM36958	12	1	1	10	0
GSM36959	0	0	1	0	23
GSM36960	0	0	0	1	23
GSM36961	0	0	18	2	4
GSM36962	24	0	0	0	0
GSM36963	10	14	0	0	0
GSM36964	0	0	22	1	1
GSM36965	21	2	0	1	0
GSM36966	0	1	0	0	23
GSM36967	13	11	0	0	0
GSM36968	1	3	17	0	3
GSM36969	0	0	0	0	24
GSM36970	23	0	0	1	0
GSM36971	22	2	0	0	0
GSM36972	7	17	0	0	0
GSM36973	21	3	0	0	0
GSM36974	0	24	0	0	0
GSM36975	11	5	8	0	0
GSM36976	18	3	0	3	0
GSM36977	0	0	0	2	22
GSM36978	13	2	2	7	0
GSM36979	0	24	0	0	0
GSM36980	23	1	0	0	0
GSM36981	0	0	0	0	24
GSM36982	7	0	0	17	0
GSM36983	23	0	1	0	0
GSM36984	3	21	0	0	0
GSM36985	3	21	0	0	0
GSM36986	22	2	0	0	0
GSM36987	20	3	0	1	0
GSM36988	11	13	0	0	0
GSM36989	2	22	0	0	0
GSM36990	23	1	0	0	0
GSM36991	0	0	1	0	23
GSM36994	23	1	0	0	0
GSM36995	1	23	0	0	0
GSM36996	5	16	3	0	0
GSM36997	0	24	0	0	0
GSM36998	24	0	0	0	0
GSM36999	23	1	0	0	0
GSM37000	24	0	0	0	0
GSM37001	20	1	0	3	0
GSM37002	0	0	0	1	23
GSM37003	0	24	0	0	0
GSM37004	6	18	0	0	0
GSM37005	22	2	0	0	0
GSM37006	4	20	0	0	0
GSM37007	0	24	0	0	0
GSM37008	12	12	0	0	0
GSM37009	21	3	0	0	0
GSM37010	15	9	0	0	0
GSM37011	15	9	0	0	0
GSM37012	24	0	0	0	0
GSM37013	22	2	0	0	0
GSM37014	4	20	0	0	0
GSM37015	24	0	0	0	0
GSM37016	0	5	19	0	0
GSM37017	0	0	1	0	23
GSM37018	0	24	0	0	0
GSM37019	17	3	0	4	0
GSM37020	0	12	12	0	0
GSM37021	0	0	0	0	24
GSM37022	0	0	1	0	23
GSM37023	3	2	19	0	0
GSM37024	23	1	0	0	0
GSM37025	21	3	0	0	0
GSM37026	22	2	0	0	0
GSM37027	16	5	0	3	0
GSM37028	22	2	0	0	0
GSM37029	6	18	0	0	0
GSM37031	0	24	0	0	0
GSM37032	21	3	0	0	0
GSM37033	17	2	0	5	0
GSM37034	0	4	20	0	0
GSM37035	0	24	0	0	0
GSM37036	8	16	0	0	0
GSM37037	5	19	0	0	0
GSM37038	3	21	0	0	0
GSM37039	23	1	0	0	0
GSM37040	0	0	3	1	20
GSM37041	15	0	1	8	0
GSM37042	0	8	16	0	0
GSM37043	0	0	0	1	23
GSM37044	21	1	2	0	0
GSM37045	3	0	5	0	16
GSM37046	21	3	0	0	0
GSM37047	1	0	4	0	19
GSM37048	0	0	2	15	7
GSM37049	19	0	1	4	0
GSM37051	0	0	1	6	17
GSM37052	3	0	1	17	3
GSM37054	1	8	15	0	0
GSM37055	0	18	6	0	0
GSM37056	14	0	1	9	0
GSM37057	8	15	1	0	0
GSM37058	0	23	0	1	0
GSM37059	24	0	0	0	0
GSM37060	17	3	0	4	0
GSM37061	24	0	0	0	0
GSM37062	4	16	4	0	0
GSM50034	1	16	7	0	0
GSM50035	0	0	0	0	24
GSM50036	13	10	1	0	0
GSM50037	3	21	0	0	0
GSM50038	1	23	0	0	0
GSM50039	0	24	0	0	0
GSM50040	0	0	0	0	24
GSM50041	0	0	1	1	22
GSM50042	3	1	0	7	13
GSM50043	0	24	0	0	0
GSM50044	3	21	0	0	0
GSM50045	1	1	0	3	19
GSM50046	0	0	0	0	24
GSM50047	21	3	0	0	0
GSM50048	0	0	0	3	21
GSM50049	24	0	0	0	0
GSM50050	0	0	0	4	20
GSM50051	11	0	0	13	0
GSM50052	0	0	1	3	20
GSM50053	19	5	0	0	0
GSM50054	0	0	0	1	23
GSM50055	0	1	0	6	17
GSM50056	0	21	3	0	0
GSM50057	0	0	0	0	24
GSM50058	1	1	2	10	10
GSM50059	1	23	0	0	0
GSM50060	1	8	15	0	0
GSM50061	1	1	0	9	13
GSM50062	1	23	0	0	0
GSM50063	1	0	0	6	17
GSM50064	0	0	0	19	5
GSM50065	13	3	4	4	0
GSM50066	0	6	2	8	8
GSM50067	0	1	0	0	23
GSM50068	15	9	0	0	0
GSM50069	1	0	1	9	13
GSM50070	1	0	21	0	2
GSM50071	15	3	4	2	0
GSM50072	8	2	8	6	0
GSM50073	2	0	1	1	20
GSM50074	21	0	0	3	0
GSM50075	11	2	2	7	2
GSM50076	22	2	0	0	0
GSM50077	23	1	0	0	0
GSM50078	0	0	2	5	17
GSM50079	0	0	0	1	23
GSM50080	21	1	0	2	0
GSM50081	24	0	0	0	0
GSM50082	15	0	1	8	0
GSM50083	5	19	0	0	0
GSM50084	7	11	6	0	0
GSM50085	0	24	0	0	0
GSM50086	8	16	0	0	0
GSM50087	3	20	1	0	0
GSM50088	13	0	1	10	0
GSM50089	3	0	0	20	1
GSM50090	22	2	0	0	0
GSM50091	1	23	0	0	0
GSM50092	1	7	4	8	4
GSM50093	0	0	0	1	23
GSM50094	0	0	0	2	22
GSM50095	22	2	0	0	0
GSM50096	0	1	0	4	19
GSM50097	12	12	0	0	0
GSM50098	24	0	0	0	0
GSM50099	1	23	0	0	0
GSM50100	19	0	0	5	0
GSM50101	12	12	0	0	0
GSM50102	0	0	0	0	24
GSM50103	0	2	6	2	14
GSM50105	4	20	0	0	0
GSM50106	0	0	0	2	22
GSM50107	1	0	0	0	23
GSM50109	17	7	0	0	0
GSM50110	3	4	0	3	14
GSM50111	23	1	0	0	0
GSM50112	2	1	0	0	21
GSM50113	24	0	0	0	0
GSM50115	14	10	0	0	0
GSM50116	19	0	0	5	0
GSM50117	0	24	0	0	0
GSM50118	0	24	0	0	0
GSM50119	0	0	0	2	22
GSM50120	22	2	0	0	0
GSM50121	11	13	0	0	0
GSM50122	5	19	0	0	0
GSM50123	1	1	0	1	21
GSM50124	22	2	0	0	0
GSM50125	1	12	11	0	0
GSM50126	15	5	0	4	0
GSM50127	14	5	4	1	0
GSM50128	9	15	0	0	0
GSM50129	11	13	0	0	0
GSM50130	4	3	12	1	4
GSM50131	0	24	0	0	0
GSM505342	2	5	17	0	0
GSM505350	7	8	9	0	0
GSM505377	0	3	21	0	0
GSM505379	1	22	1	0	0
GSM505381	3	2	19	0	0
GSM505383	23	0	1	0	0
GSM505385	0	19	5	0	0
GSM505387	0	2	22	0	0
GSM505389	0	24	0	0	0
GSM505391	6	18	0	0	0
GSM505393	14	10	0	0	0
GSM505395	0	24	0	0	0
GSM505399	14	7	0	3	0
GSM505401	0	10	14	0	0
GSM505403	24	0	0	0	0
GSM505405	6	17	0	1	0
GSM505407	8	16	0	0	0
GSM505409	0	24	0	0	0
GSM505413	1	0	2	4	17
GSM505427	1	22	1	0	0
GSM505428	1	0	0	1	22
GSM505429	23	1	0	0	0
GSM505430	4	20	0	0	0
GSM505431	0	24	0	0	0
GSM505432	18	0	1	5	0
GSM505433	20	3	0	1	0
GSM505434	0	1	23	0	0
GSM505435	2	3	0	10	9
GSM505437	0	3	21	0	0
GSM505438	0	0	0	2	22
GSM505439	1	5	0	7	11
GSM505440	20	0	1	3	0
GSM505441	1	23	0	0	0
GSM505442	0	24	0	0	0
GSM505443	20	0	0	4	0
GSM505444	4	20	0	0	0
GSM505445	0	0	23	1	0
GSM505446	21	2	0	1	0
GSM505447	1	3	20	0	0
GSM505448	19	0	0	5	0
GSM505449	5	19	0	0	0
GSM505450	1	16	6	0	1
GSM505451	22	2	0	0	0
GSM505452	13	11	0	0	0
GSM505453	3	21	0	0	0
GSM505454	1	1	0	0	22
GSM505455	1	22	1	0	0
GSM505456	2	22	0	0	0
GSM505457	1	23	0	0	0
GSM505458	12	0	0	12	0
GSM505459	1	22	1	0	0
GSM505460	0	0	0	1	23
GSM505461	1	22	1	0	0
GSM505462	0	0	0	1	23
GSM505463	1	23	0	0	0
GSM505464	23	0	0	1	0
GSM505465	20	3	0	1	0
GSM505466	2	2	0	2	18
GSM505467	0	1	0	4	19
GSM505468	2	19	2	0	1
GSM505469	18	5	0	1	0
GSM505471	0	24	0	0	0
GSM505472	21	0	0	3	0
GSM505473	1	23	0	0	0
GSM505474	1	23	0	0	0
GSM505475	0	1	0	5	18
GSM505476	0	24	0	0	0
GSM505477	15	8	0	1	0
GSM505478	1	1	0	21	1
GSM505479	0	23	1	0	0
GSM505480	0	24	0	0	0
GSM505481	4	20	0	0	0
GSM505482	17	4	0	3	0
GSM505483	2	22	0	0	0
GSM505484	21	3	0	0	0
GSM505485	1	23	0	0	0
GSM505486	1	23	0	0	0
GSM505487	3	3	17	1	0
GSM505488	21	3	0	0	0
GSM505490	0	1	2	4	17
GSM505503	0	1	0	0	23
GSM505504	0	0	9	2	13
GSM505505	0	2	22	0	0
GSM505506	20	4	0	0	0
GSM505507	16	0	0	8	0
GSM505508	15	0	0	8	1
GSM505509	24	0	0	0	0
GSM505510	3	20	0	0	1
GSM505511	0	8	16	0	0
GSM505512	24	0	0	0	0
GSM505513	0	0	0	0	24
GSM505514	1	0	3	0	20
GSM505515	24	0	0	0	0
GSM505516	0	1	2	0	21
GSM505517	8	0	0	16	0
GSM505518	0	9	3	2	10
GSM505519	6	18	0	0	0
GSM505520	23	0	0	1	0
GSM505521	0	0	23	1	0
GSM505522	3	21	0	0	0
GSM505523	22	1	0	1	0
GSM505524	1	4	19	0	0
GSM505525	7	13	1	3	0
GSM505526	0	2	13	0	9
GSM505527	0	1	6	4	13
GSM505528	1	0	0	4	19
GSM505529	24	0	0	0	0
GSM505530	24	0	0	0	0
GSM505531	2	4	14	3	1
GSM505532	11	13	0	0	0
GSM505533	2	0	1	17	4
GSM505534	1	3	5	0	15
GSM505535	1	0	0	1	22
GSM505536	7	0	0	17	0
GSM505537	4	0	1	19	0
GSM505538	22	2	0	0	0
GSM505539	23	1	0	0	0
GSM505540	2	1	0	2	19
GSM505541	0	0	0	2	22
GSM505542	1	22	1	0	0
GSM505543	1	0	0	0	23
GSM505544	23	1	0	0	0
GSM505545	0	1	1	1	21
GSM505546	6	2	16	0	0
GSM505547	0	24	0	0	0
GSM505548	1	0	0	11	12
GSM505549	14	0	0	10	0
GSM505550	24	0	0	0	0
GSM505551	23	1	0	0	0
GSM505552	0	2	0	4	18
GSM505553	0	2	0	2	20
GSM505554	0	2	6	0	16
GSM505555	0	4	0	3	17
GSM505556	5	19	0	0	0
GSM505557	18	6	0	0	0
GSM505558	2	1	3	7	11
GSM505559	2	22	0	0	0
GSM505560	0	24	0	0	0
GSM505561	0	0	0	0	24
GSM505562	0	1	0	0	23
GSM505563	0	1	0	5	18
GSM505564	1	0	1	0	22
GSM505565	5	19	0	0	0
GSM505566	0	0	0	1	23
GSM505567	3	21	0	0	0
GSM505568	3	19	1	1	0
GSM505569	19	0	0	5	0
GSM505570	0	4	18	0	2
GSM505571	0	24	0	0	0
GSM505572	3	0	1	8	12
GSM505573	1	23	0	0	0
GSM505574	0	0	1	2	21
GSM505575	0	1	0	1	22
GSM505576	21	3	0	0	0
GSM505577	0	24	0	0	0
GSM505578	24	0	0	0	0
GSM505579	7	17	0	0	0
GSM505580	0	2	0	8	14
GSM505581	23	1	0	0	0
GSM505582	1	23	0	0	0
GSM505583	0	0	0	0	24
GSM505584	2	0	0	0	22
GSM505585	4	20	0	0	0
GSM505586	4	0	9	11	0
GSM505587	23	0	0	1	0
GSM505588	0	1	0	3	20
GSM505589	23	0	0	1	0
GSM505590	5	19	0	0	0
GSM505591	0	24	0	0	0
GSM505592	0	0	3	0	21
GSM505593	5	19	0	0	0
GSM505594	4	19	0	1	0
GSM505595	24	0	0	0	0
GSM505596	0	24	0	0	0
GSM505597	8	16	0	0	0
GSM505598	23	0	1	0	0
GSM505599	19	5	0	0	0
GSM505600	22	1	1	0	0
GSM505601	16	8	0	0	0
GSM505602	1	23	0	0	0
GSM505603	21	3	0	0	0
GSM505604	1	23	0	0	0
GSM505605	0	24	0	0	0
GSM512539	7	0	0	16	1
GSM512540	7	0	0	17	0
GSM512541	8	0	1	15	0
GSM512543	3	0	0	21	0
GSM512544	9	0	1	14	0
GSM512545	8	0	0	16	0
GSM512546	6	0	0	17	1
GSM512547	2	0	0	22	0
GSM512549	3	0	0	21	0
GSM512550	4	0	1	19	0
GSM512551	19	0	0	5	0
GSM512552	1	0	0	23	0
GSM512553	6	0	0	18	0
GSM512554	4	0	0	20	0
GSM512555	8	0	1	15	0
GSM512556	2	0	0	19	3
GSM512557	5	0	0	18	1
GSM512558	6	0	1	17	0
GSM512559	6	2	2	14	0
GSM512560	3	0	0	21	0
GSM512561	3	0	0	21	0
GSM512562	0	0	0	24	0
GSM512563	16	0	1	7	0
GSM512564	7	0	0	17	0
GSM512565	18	0	1	5	0
GSM512566	3	0	0	21	0
GSM512567	2	0	1	21	0
GSM512568	6	0	0	18	0
GSM512569	11	0	1	12	0
GSM512570	3	0	0	20	1
GSM512571	20	0	0	4	0
GSM512572	5	0	0	19	0
GSM512573	5	0	0	19	0
GSM512574	3	0	1	20	0
GSM512575	8	0	1	15	0
GSM512576	17	0	1	6	0
GSM512577	5	0	0	19	0
GSM512578	3	0	0	21	0
GSM512579	7	0	0	17	0
GSM512580	6	0	0	18	0
GSM65316	14	6	1	3	0
GSM65317	1	23	0	0	0
GSM65318	24	0	0	0	0
GSM65319	24	0	0	0	0
GSM65320	23	0	0	1	0
GSM65321	0	24	0	0	0
GSM65322	0	24	0	0	0
GSM65323	23	0	0	1	0
GSM65324	8	16	0	0	0
GSM65325	1	18	4	0	1
GSM65326	19	1	0	4	0
GSM65327	15	9	0	0	0
GSM65328	7	17	0	0	0
GSM65329	24	0	0	0	0
GSM65330	13	11	0	0	0
GSM65331	24	0	0	0	0
GSM65332	24	0	0	0	0
GSM65333	1	1	19	0	3
GSM65334	24	0	0	0	0
GSM65335	1	23	0	0	0
GSM65336	24	0	0	0	0
GSM65337	0	24	0	0	0
GSM65338	13	11	0	0	0
GSM65339	0	0	0	2	22
GSM65340	14	0	1	9	0
GSM65341	2	20	2	0	0
GSM65342	21	0	1	2	0
GSM65343	17	1	1	5	0
GSM65344	1	22	1	0	0
GSM65345	10	14	0	0	0
GSM65346	14	0	0	10	0
GSM65347	17	2	1	4	0
GSM65348	19	5	0	0	0
GSM65349	21	0	0	3	0
GSM65350	2	14	6	2	0
GSM65351	17	7	0	0	0
GSM65352	0	24	0	0	0
GSM65353	7	17	0	0	0
GSM65354	5	18	1	0	0
GSM65355	11	0	0	13	0
GSM65356	12	4	1	7	0
GSM65357	14	4	1	5	0
GSM65358	20	4	0	0	0
GSM65359	2	22	0	0	0
GSM65360	14	10	0	0	0
GSM65361	23	0	1	0	0
GSM65362	14	0	1	9	0
GSM65363	20	0	1	3	0
GSM65364	16	7	1	0	0
GSM65365	23	0	1	0	0
GSM65366	1	23	0	0	0
GSM65367	13	2	5	4	0
GSM65368	17	0	1	6	0
GSM65369	1	19	3	1	0
GSM65370	3	20	1	0	0
GSM65371	1	23	0	0	0
GSM65372	1	23	0	0	0
GSM65373	13	11	0	0	0
GSM65374	0	24	0	0	0
GSM65375	3	21	0	0	0
GSM65376	15	3	1	5	0
GSM65377	0	24	0	0	0
GSM65378	15	2	1	6	0
GSM65379	24	0	0	0	0
GSM65752	0	0	0	0	24
GSM65753	21	0	1	2	0
GSM65754	19	0	1	4	0
GSM65755	13	6	4	1	0
GSM65756	14	9	1	0	0
GSM65757	10	11	3	0	0
GSM65758	24	0	0	0	0
GSM65760	0	24	0	0	0
GSM65761	4	20	0	0	0
GSM65762	20	0	0	4	0
GSM65763	24	0	0	0	0
GSM65764	24	0	0	0	0
GSM65765	21	3	0	0	0
GSM65766	15	0	0	9	0
GSM65767	24	0	0	0	0
GSM65768	0	17	6	0	1
GSM65769	17	0	1	6	0
GSM65770	21	0	0	3	0
GSM65771	23	0	1	0	0
GSM65772	10	1	6	6	1
GSM65773	16	0	1	7	0
GSM65774	1	23	0	0	0
GSM65775	21	2	1	0	0
GSM65776	20	0	1	3	0
GSM65779	16	0	1	7	0
GSM65780	23	0	1	0	0
GSM65781	24	0	0	0	0
GSM65782	21	0	0	3	0
GSM65783	19	0	0	5	0
GSM65784	23	1	0	0	0
GSM65785	24	0	0	0	0
GSM65786	13	11	0	0	0
GSM65787	24	0	0	0	0
GSM65788	13	0	0	11	0
GSM65789	23	0	1	0	0
GSM65790	21	2	0	1	0
GSM65791	24	0	0	0	0
GSM65792	0	0	0	1	23
GSM65793	20	0	1	3	0
GSM65794	7	0	13	3	1
GSM65795	0	0	0	0	24
GSM65796	23	0	1	0	0
GSM65797	24	0	0	0	0
GSM65798	24	0	0	0	0
GSM65799	24	0	0	0	0
GSM65800	23	0	1	0	0
GSM65801	24	0	0	0	0
GSM65802	0	0	1	1	22
GSM65803	15	0	1	8	0
GSM65804	2	2	0	4	16
GSM65805	0	0	0	0	24
GSM65806	0	0	0	1	23
GSM65807	19	0	0	5	0
GSM65808	24	0	0	0	0
GSM65810	24	0	0	0	0
GSM65811	18	0	1	5	0
GSM65812	24	0	0	0	0
GSM65813	7	13	4	0	0
GSM65814	23	0	1	0	0
GSM65815	23	1	0	0	0
GSM65816	0	0	0	0	24
GSM65817	24	0	0	0	0
GSM65818	4	20	0	0	0
GSM65819	1	17	6	0	0
GSM65820	22	2	0	0	0
GSM65821	13	11	0	0	0
GSM65822	15	9	0	0	0
GSM65823	24	0	0	0	0
GSM65824	15	0	1	8	0
GSM65825	0	8	15	0	1
GSM65826	20	0	1	3	0
GSM65827	22	1	1	0	0
GSM65828	1	23	0	0	0
GSM65829	22	2	0	0	0
GSM65830	20	0	1	3	0
GSM65831	0	24	0	0	0
GSM65832	24	0	0	0	0
GSM65833	20	1	0	3	0
GSM65834	10	13	1	0	0
GSM65835	2	1	13	6	2
GSM65836	19	0	1	4	0
GSM65837	0	24	0	0	0
GSM65838	0	5	19	0	0
GSM65839	0	5	18	0	1
GSM65840	13	0	1	10	0
GSM65841	0	0	1	1	22
GSM65842	0	2	2	0	20
GSM65843	0	1	6	1	16
GSM65844	1	23	0	0	0
GSM65845	0	1	0	0	23
GSM65846	2	11	11	0	0
GSM65847	23	1	0	0	0
GSM65848	23	0	1	0	0
GSM65849	19	0	1	4	0
GSM65850	0	0	0	2	22
GSM65851	1	23	0	0	0
GSM65852	0	1	1	0	22
GSM65853	23	1	0	0	0
GSM65854	23	0	1	0	0
GSM65855	23	0	1	0	0
GSM65856	4	20	0	0	0
GSM65857	1	23	0	0	0
GSM65858	24	0	0	0	0
GSM65859	24	0	0	0	0
GSM65860	24	0	0	0	0
GSM65861	1	1	3	9	10
GSM65862	24	0	0	0	0
GSM65863	0	0	0	2	22
GSM65864	20	0	1	3	0
GSM65865	1	0	0	23	0
GSM65866	0	5	19	0	0
GSM65867	20	4	0	0	0
GSM65868	0	24	0	0	0
GSM65869	20	4	0	0	0
GSM65870	10	13	0	0	1
GSM65871	20	0	1	3	0
GSM65872	18	2	1	3	0
GSM65873	21	3	0	0	0
GSM65874	8	0	1	15	0
GSM65875	23	1	0	0	0
GSM65876	2	4	1	9	8
GSM65877	20	0	1	3	0
GSM65878	0	0	0	13	11
GSM65879	2	0	0	17	5
GSM65880	20	0	1	3	0
