# Supplementary material for: The Discovery of Novel Biomarkers Improves Breast Cancer Intrinsic Subtype Prediction and Reconciles the Labels in the METABRIC Data Set
Source: PLoS One. 2015 Jul 1;10(7):e0129711. doi: 10.1371/journal.pone.0129711 (PMC4488510; doi:10.1371/journal.pone.0129711)
Supplement: S4 Table — Table containing the Fleiss’ Kappa agreement of labels for the METABRIC discovery and validation sets, and ROCK test set. It shows the overall agreement Among classifiers using CM1 and PAM50 lists, as well as the agreement for each subtype. The predicted—original are described in the table and contain the agreement between the mostly predicted and initial labels of samples; whereas the CM1—PAM50 show agreement between labels assigned by the majority of classifiers using CM1 and PAM50 lists. The file also has the Jensen-Shannon divergence between two probability distributions. Numbers represent the similarity between subtypes distribution for METABRIC discovery and validation sets, and ROCK test set. The similarity is measured using the square root of the Jensen-Shannon divergence. (XLSX) [file pone.0129711.s006.xlsx]

## Sheet: Legends
Sheet	Content
Kappa	Fleiss' Kappa agreement of labels for the METABRIC discovery and validation sets, and ROCK test set. Columns are: Classifiers.CM1: Agreement between classifiers, CM1 list. Classifiers.PAM50: Same, for PAM50 list. Majority.CM1: Agreement between labels selected by majority of classifiers and the original METABRIC label, CM1 list. Majority.PAM50: Same, for PAM50 list. CM1.PAM50: Agreement of labels…
Jensen-Shannon	Jensen-Shannon divergence between two probability distributions. The table shows the similarity between the subtypes distribution for METABRIC discovery (MD) and validation (MD) sets, and ROCK data set (RS). The labels were assigned in the original data sets using the PAM50 method, and relabelled in this study using an ensemble learning with PAM50 and CM1 lists. The similarity is measured using t…

## Sheet: Kappa
	METABRIC Discovery
	Classifiers.CM1	Classifiers.PAM50	Majority.CM1	Majority.PAM50	CM1.PAM50
Luminal A	0.726	0.727	0.867	0.889	0.916
Luminal B	0.738	0.734	0.875	0.877	0.905
Her2	0.701	0.68	0.8	0.891	0.965
Normal	0.485	0.476	0.699	0.822	0.9
Basal	0.861	0.854	0.928	0.948	0.984
Overall	0.73	0.724	0.814	0.84	0.859
	METABRIC Validation
	Classifiers.CM1	Classifiers.PAM50	Majority.CM1	Majority.PAM50	CM1.PAM50
Luminal A	0.758	0.739	0.603	0.622	0.918
Luminal B	0.753	0.721	0.65	0.69	0.889
Her2	0.703	0.655	0.545	0.618	0.925
Normal	0.641	0.593	0.479	0.477	0.911
Basal	0.849	0.858	0.799	0.837	0.987
Overall	0.753	0.729	0.596	0.618	0.832
	ROCK test set
	Classifiers.CM1	Classifiers.PAM50	Majority.CM1	Majority.PAM50	CM1.PAM50
Luminal A	0.603	0.575	0.627	0.695	0.781
Luminal B	0.622	0.627	0.678	0.729	0.759
Her2	0.581	0.444	0.16	0.238	0.822
Normal	0.401	0.373	0.314	0.379	0.769
Basal	0.81	0.793	0.793	0.76	0.923
Overall	0.626	0.59	0.591	0.641	0.804
Columns entitled `Among classifiers' indicate agreement of classifiers alone, while columns entitled `Predicted -- Original' contain the agreement between the mostly predicted and initial label of samples. Finally, columns entitled `CM1 -- PAM50' contain the agreement between the mostly predicted labels using the CM1 and PAM50 lists.

## Sheet: Jensen-Shannon
		Original labels			CM1 list			PAM50 list
		discovery	validation	ROCK set	discovery	validation	ROCK set	discovery	validation	ROCK set
PAM50 list	discovery	0	0.20014	0.21259	0.12074	0.12995	0.15672	0.12299	0.14551	0.16726	Single Classifier (PAM)
	validation	0.20014	0	0.2467	0.23648	0.17753	0.21653	0.23824	0.18188	0.23424
	ROCK set	0.21259	0.2467	0	0.26627	0.24094	0.24051	0.2632	0.25343	0.23765
CM1 list	discovery	0.12074	0.23648	0.26627	0	0.08106	0.0962	0.00791	0.08638	0.09971	Ensenble Learning
	validation	0.12995	0.17753	0.24094	0.08106	0	0.09889	0.0814	0.02035	0.08399
	ROCK set	0.15672	0.21653	0.24051	0.0962	0.09889	0	0.09065	0.0997	0.07215
PAM50 list	discovery	0.12299	0.23824	0.2632	0.00791	0.0814	0.09065	0	0.08653	0.09405	Ensenble Learning
	validation	0.14551	0.18188	0.25343	0.08638	0.02035	0.0997	0.08653	0	0.08427
	ROCK set	0.16726	0.23424	0.23765	0.09971	0.08399	0.07215	0.09405	0.08427	0
